# Supplementary material for: A roadmap for ribosome assembly in human mitochondria
Source: PubMed Central journal article supplement (PMC11638073; doi:10.1038/s41594-024-01356-w), 2024-07-11

uL1m  
MRPL1  
Q9BYD6  
39S ribosomal protein L1, mitochondrial

Cell lysate

Mitochondria

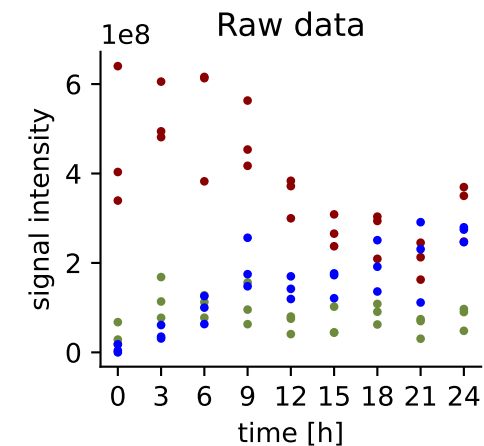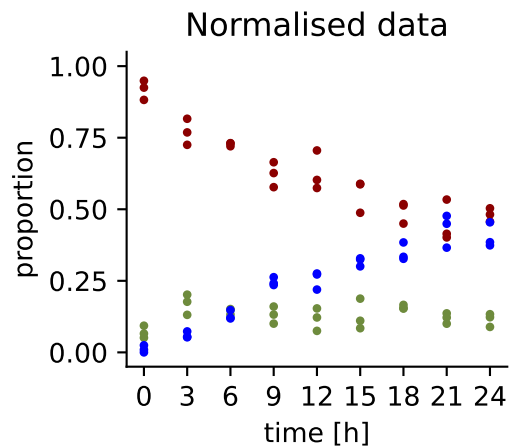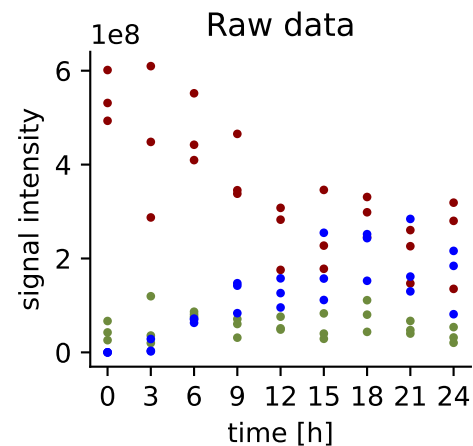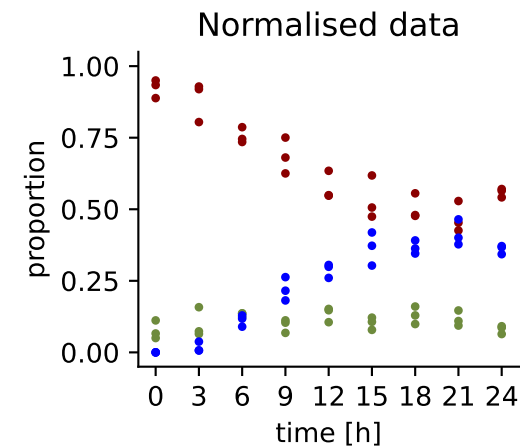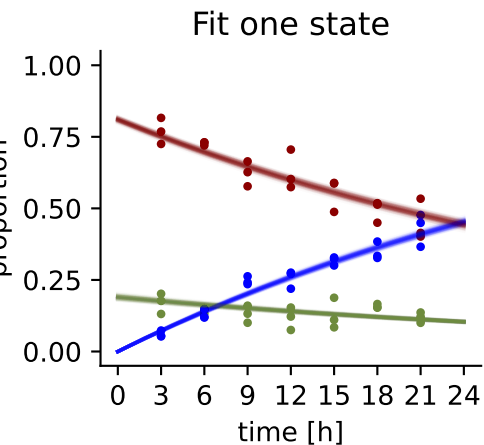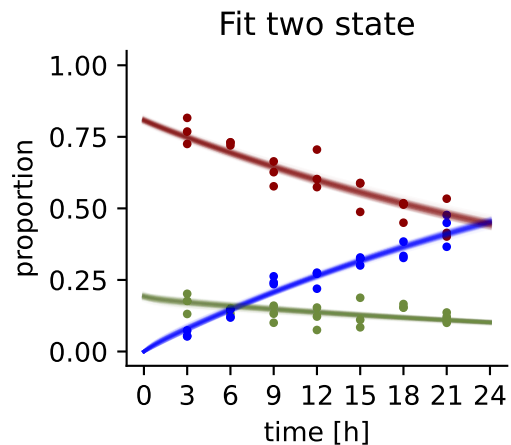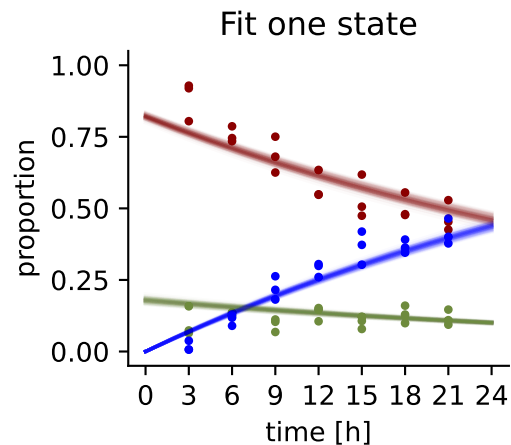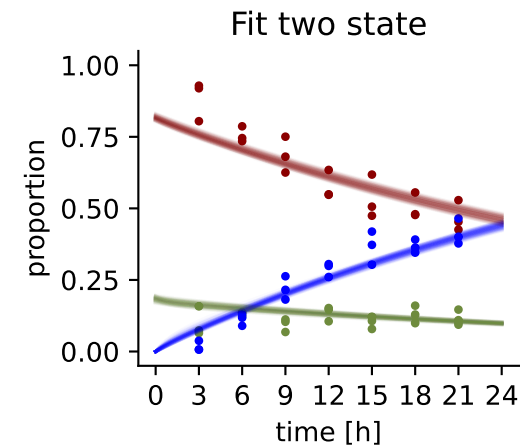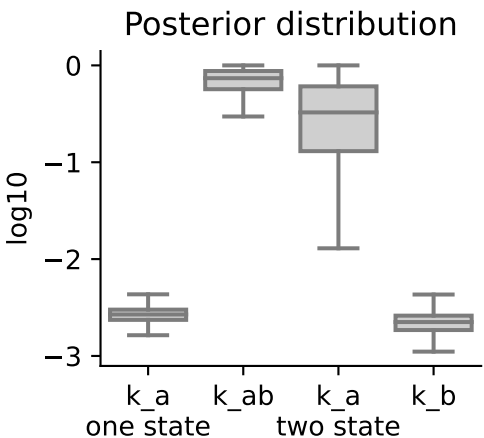

|                          |          |
|--------------------------|----------|
| p value                  | 9.95E-01 |
| log likelihood one state | 115.884  |
| log likelihood two state | 115.889  |
| rmse one state           | 0.291    |
| rmse two state           | 0.29     |
| k_a one state            | 0.003    |
| k_ab                     | 0.738    |
| k_a two state            | 0.327    |
| k_b                      | 0.002    |
| sigma one state          | 0.039    |
| sigma two state          | 0.039    |

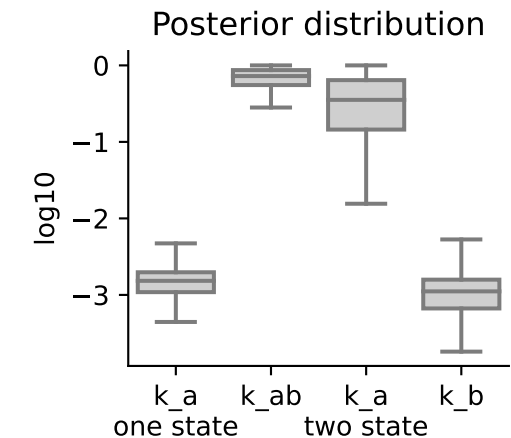

|                          |          |
|--------------------------|----------|
| p value                  | 9.81E-01 |
| log likelihood one state | 92.671   |
| log likelihood two state | 92.69    |
| rmse one state           | 0.311    |
| rmse two state           | 0.311    |
| k_a one state            | 0.002    |
| k_ab                     | 0.725    |
| k_a two state            | 0.354    |
| k_b                      | 0.001    |
| sigma one state          | 0.057    |
| sigma two state          | 0.057    |

uL2m  
MRPL2  
Q5T653  
39S ribosomal protein L2, mitochondrial

Cell lysate

Mitochondria

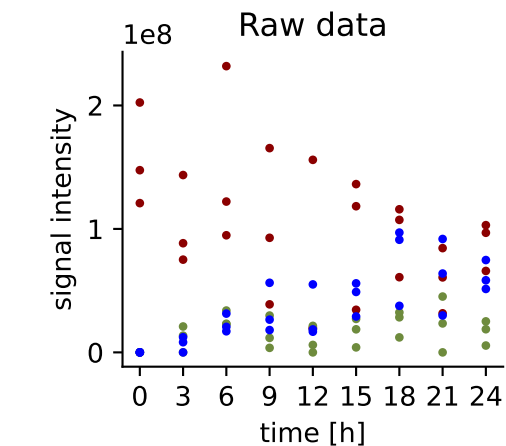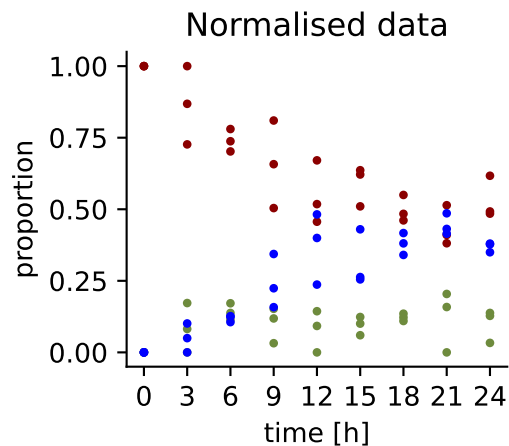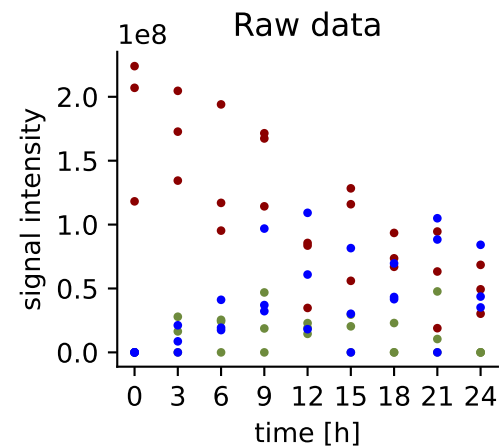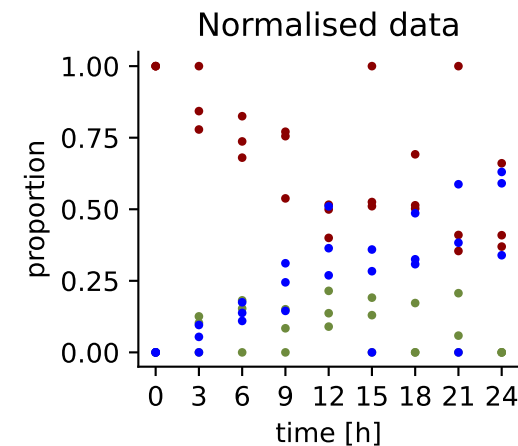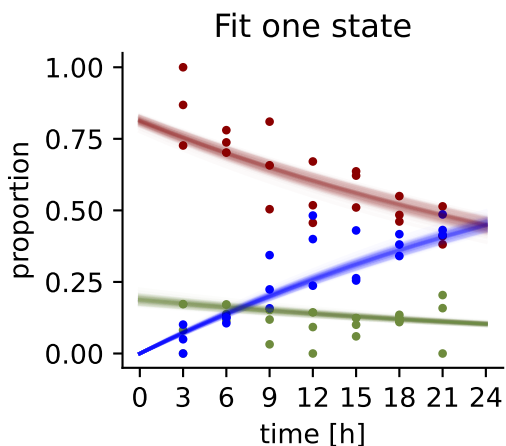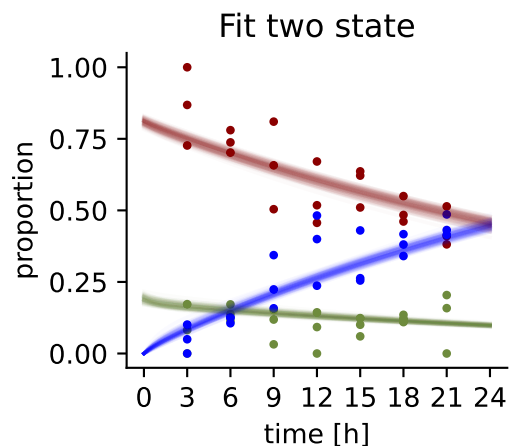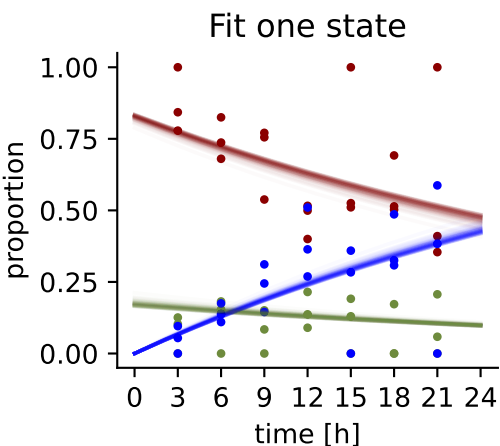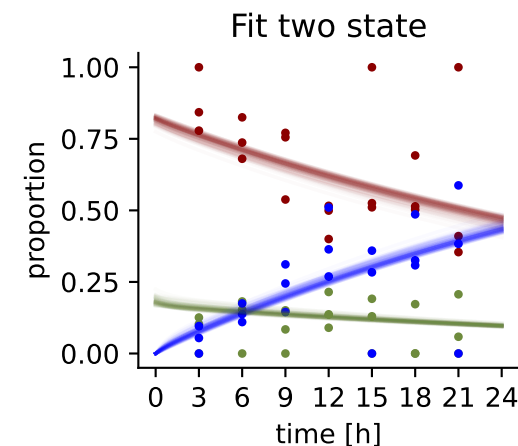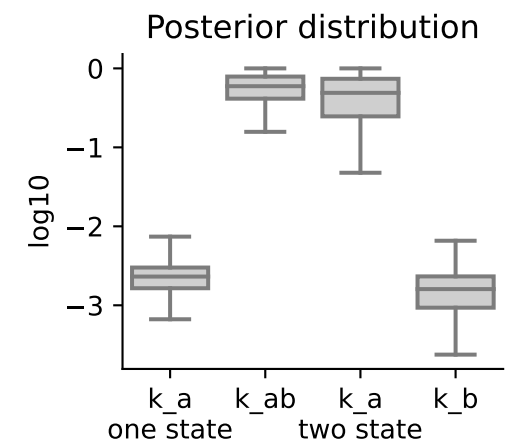

|                          |          |
|--------------------------|----------|
| p value                  | 4.68E-01 |
| log likelihood one state | 67.289   |
| log likelihood two state | 68.048   |
| rmse one state           | 0.339    |
| rmse two state           | 0.324    |
| k_a one state            | 0.002    |
| k_ab                     | 0.595    |
| k_a two state            | 0.49     |
| k_b                      | 0.002    |
| sigma one state          | 0.085    |
| sigma two state          | 0.084    |

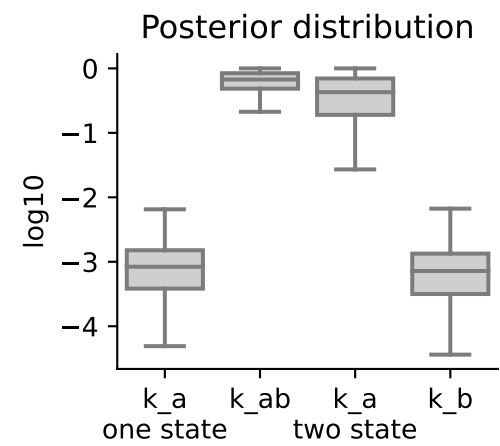

|                          |          |
|--------------------------|----------|
| p value                  | 9.77E-01 |
| log likelihood one state | 34.72    |
| log likelihood two state | 34.744   |
| rmse one state           | 0.352    |
| rmse two state           | 0.347    |
| k_a one state            | 0.001    |
| k_ab                     | 0.672    |
| k_a two state            | 0.427    |
| k_b                      | 0.001    |
| sigma one state          | 0.14     |
| sigma two state          | 0.141    |

uL3m  
MRPL3  
P09001  
39S ribosomal protein L3, mitochondrial

Cell lysate

Mitochondria

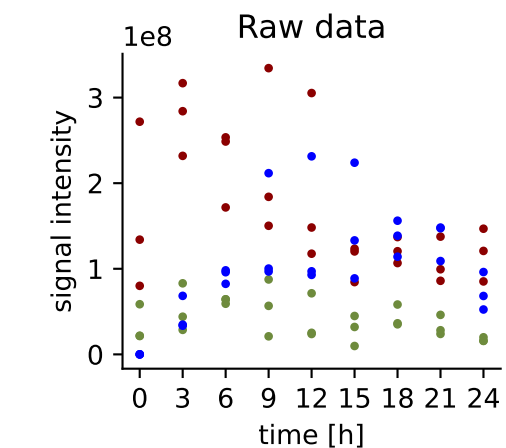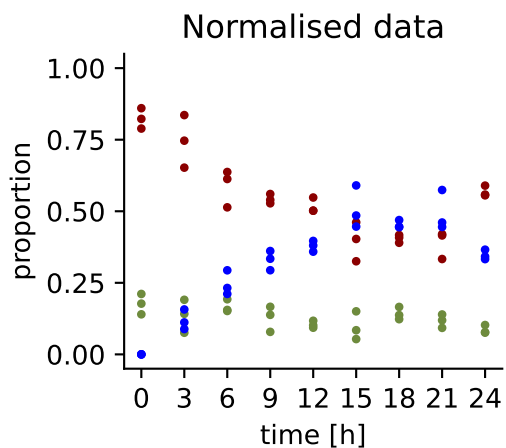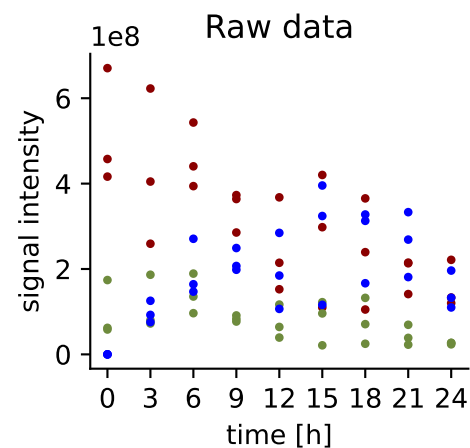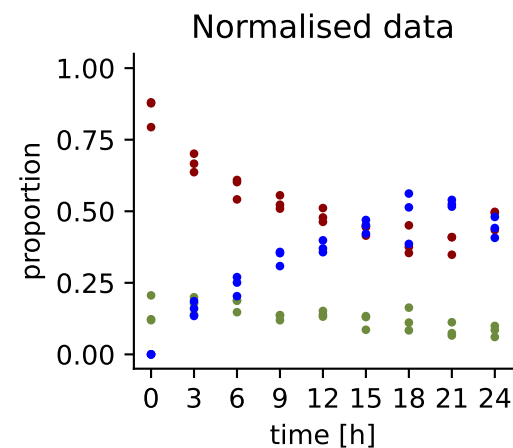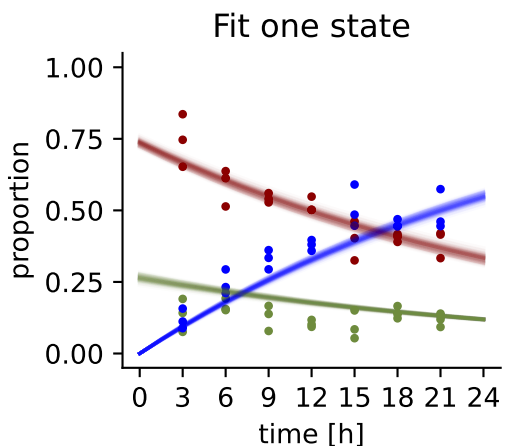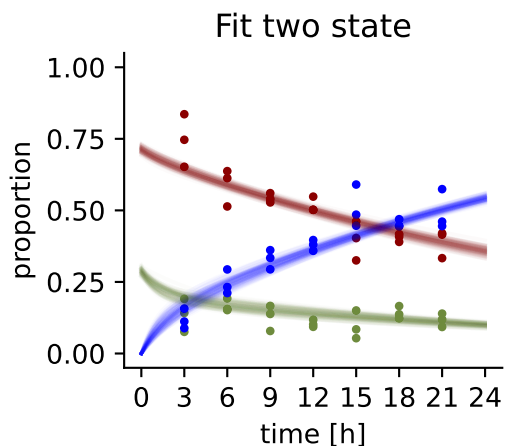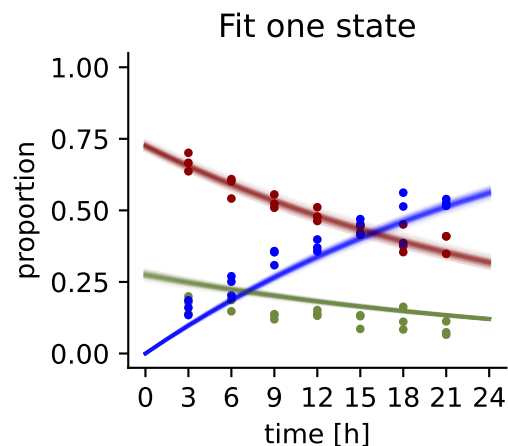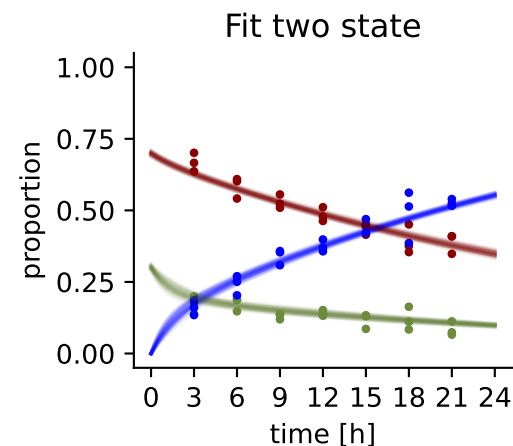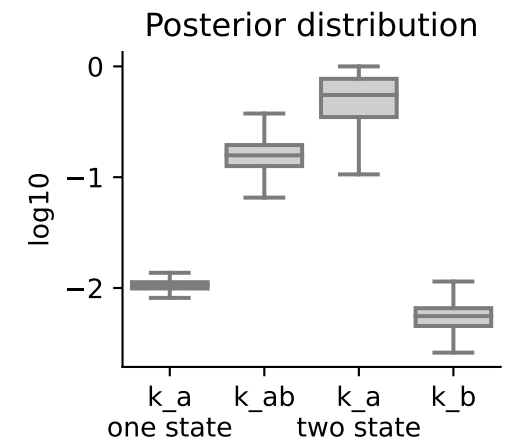

|                          |          |
|--------------------------|----------|
| p value                  | 4.88E-06 |
| log likelihood one state | 80.916   |
| log likelihood two state | 93.147   |
| rmse one state           | 0.379    |
| rmse two state           | 0.312    |
| k_a one state            | 0.011    |
| k_ab                     | 0.158    |
| k_a two state            | 0.552    |
| k_b                      | 0.006    |
| sigma one state          | 0.068    |
| sigma two state          | 0.057    |

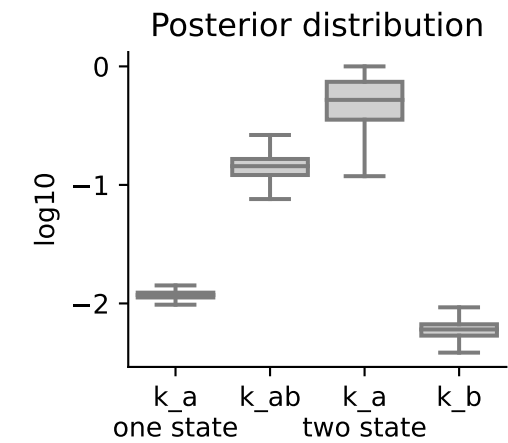

|                          |          |
|--------------------------|----------|
| p value                  | 3.02E-13 |
| log likelihood one state | 97.884   |
| log likelihood two state | 126.714  |
| rmse one state           | 0.372    |
| rmse two state           | 0.296    |
| k_a one state            | 0.012    |
| k_ab                     | 0.144    |
| k_a two state            | 0.522    |
| k_b                      | 0.006    |
| sigma one state          | 0.052    |
| sigma two state          | 0.034    |

uL4m  
MRPL4  
Q9BYD3  
39S ribosomal protein L4, mitochondrial

Cell lysate

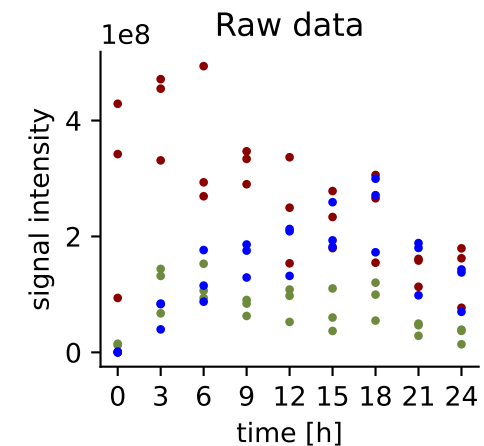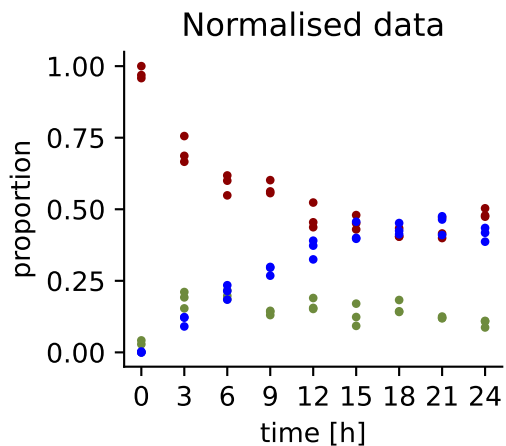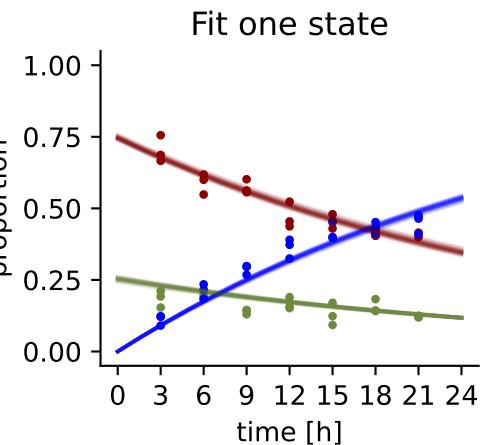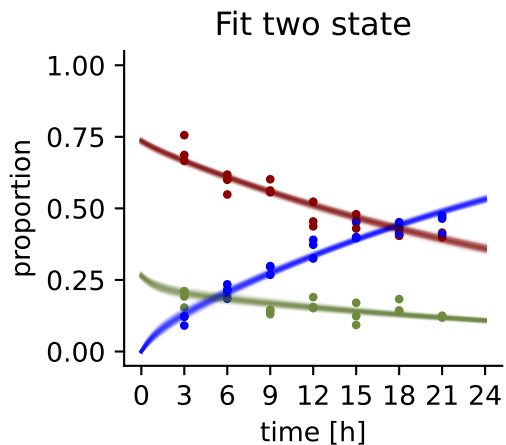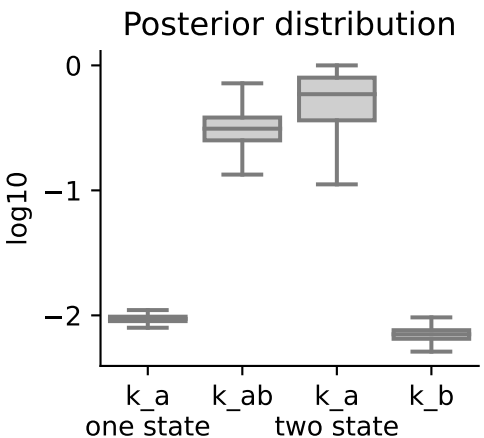

|                          |          |
|--------------------------|----------|
| p value                  | 9.60E-05 |
| log likelihood one state | 116.234  |
| log likelihood two state | 125.485  |
| rmse one state           | 0.333    |
| rmse two state           | 0.297    |
| k_a one state            | 0.009    |
| k_ab                     | 0.312    |
| k_a two state            | 0.588    |
| k_b                      | 0.007    |
| sigma one state          | 0.039    |
| sigma two state          | 0.034    |

Mitochondria

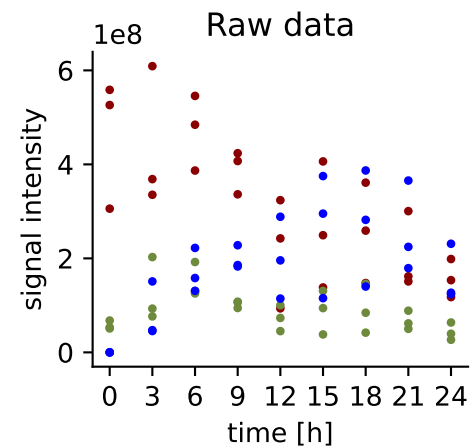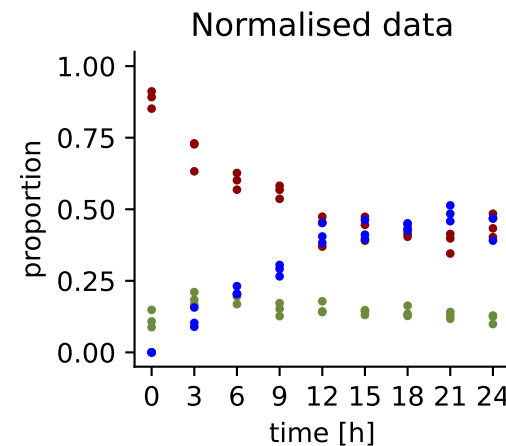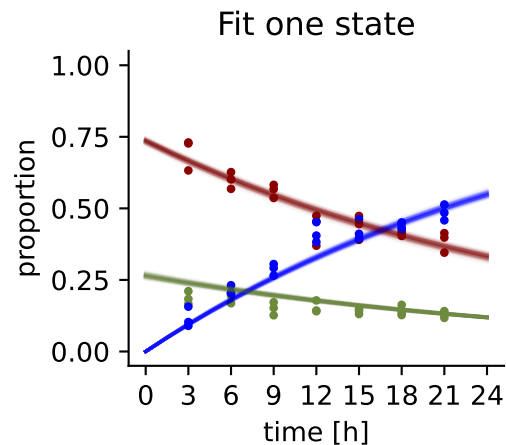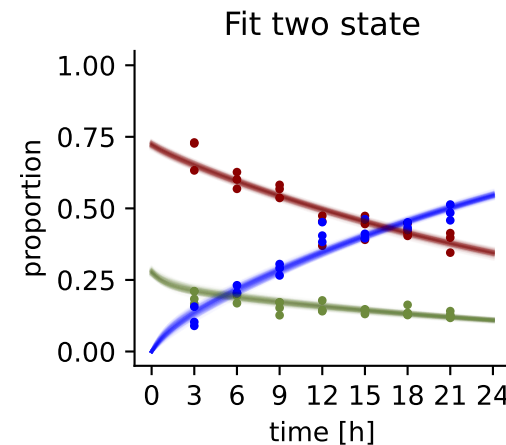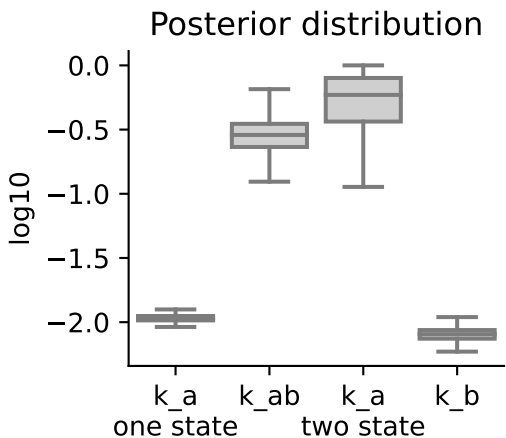

|                          |          |
|--------------------------|----------|
| p value                  | 5.01E-05 |
| log likelihood one state | 111.213  |
| log likelihood two state | 121.115  |
| rmse one state           | 0.349    |
| rmse two state           | 0.31     |
| k_a one state            | 0.011    |
| k_ab                     | 0.287    |
| k_a two state            | 0.589    |
| k_b                      | 0.008    |
| sigma one state          | 0.042    |
| sigma two state          | 0.037    |



bL9m  
MRPL9  
Q9BYD2  
39S ribosomal protein L9, mitochondrial

Cell lysate

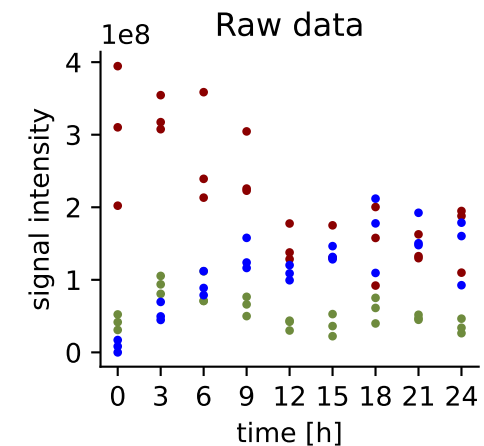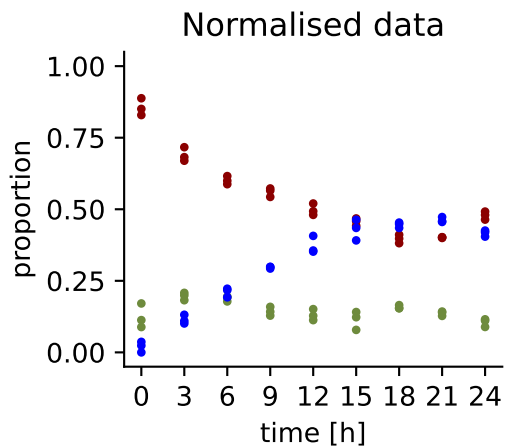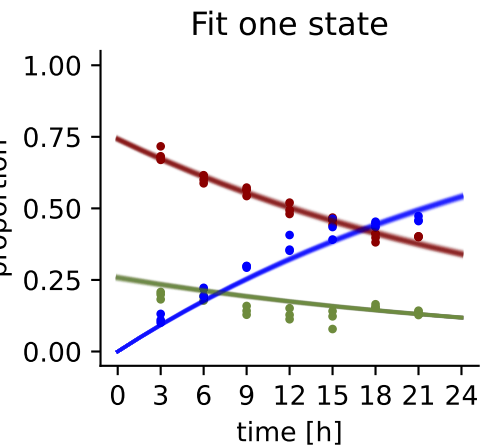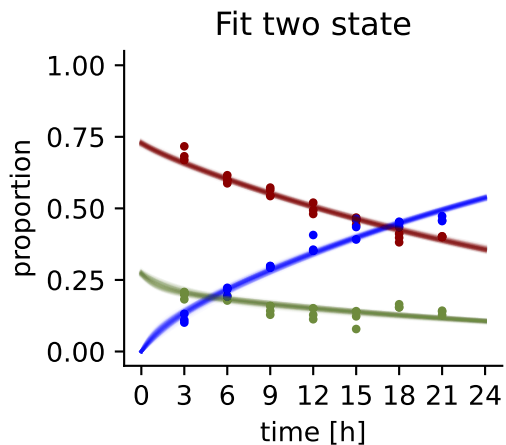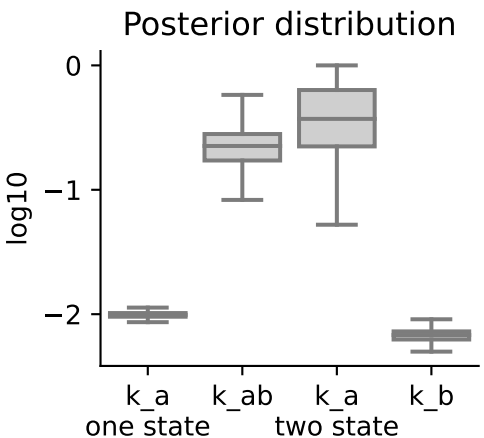

|                          |          |
|--------------------------|----------|
| p value                  | 5.36E-09 |
| log likelihood one state | 124.742  |
| log likelihood two state | 143.785  |
| rmse one state           | 0.341    |
| rmse two state           | 0.304    |
| k_a one state            | 0.01     |
| k_ab                     | 0.225    |
| k_a two state            | 0.372    |
| k_b                      | 0.007    |
| sigma one state          | 0.034    |
| sigma two state          | 0.026    |

Mitochondria

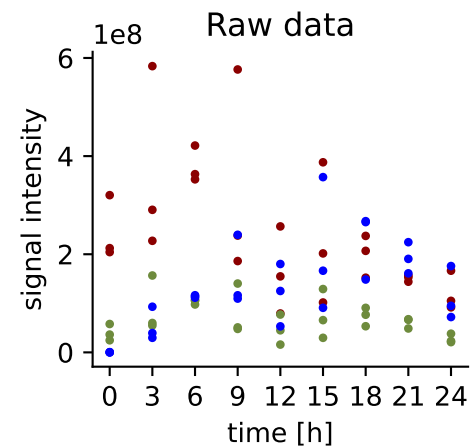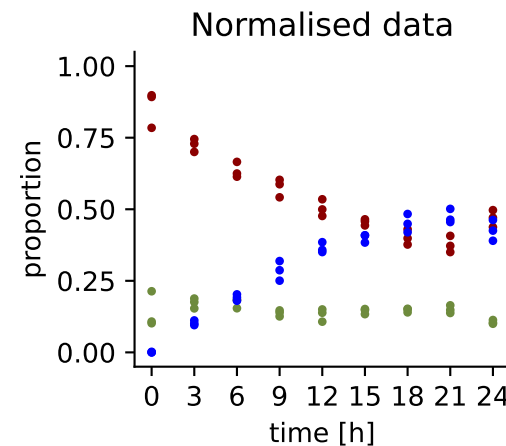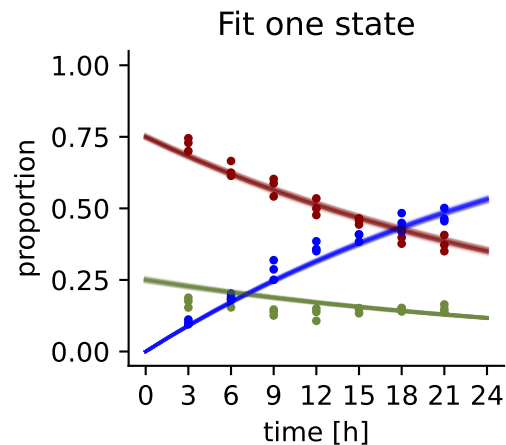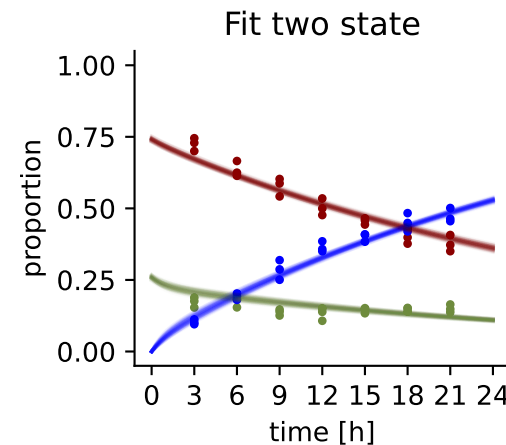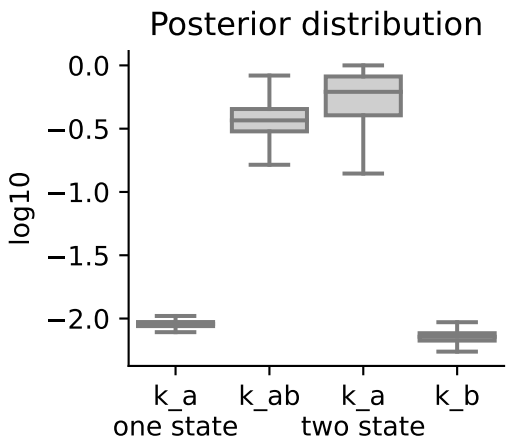

|                          |          |
|--------------------------|----------|
| p value                  | 2.57E-04 |
| log likelihood one state | 124.116  |
| log likelihood two state | 132.381  |
| rmse one state           | 0.341    |
| rmse two state           | 0.309    |
| k_a one state            | 0.009    |
| k_ab                     | 0.368    |
| k_a two state            | 0.618    |
| k_b                      | 0.007    |
| sigma one state          | 0.034    |
| sigma two state          | 0.031    |

uL10m  
MRPL10  
Q7Z7H8  
39S ribosomal protein L10, mitochondrial

Cell lysate

Mitochondria

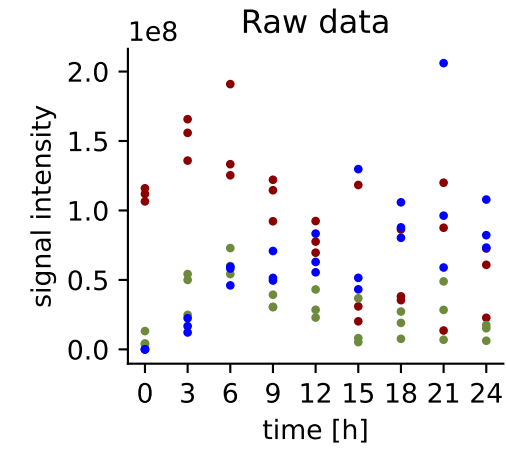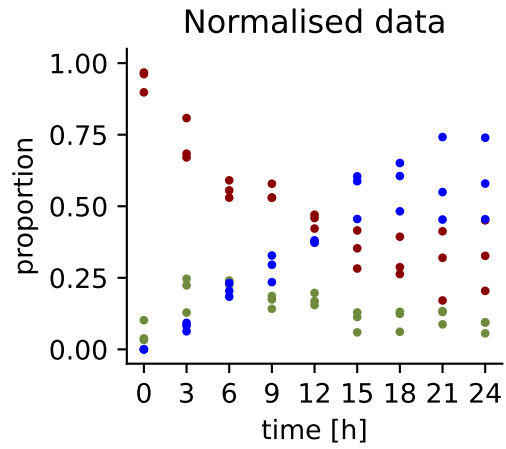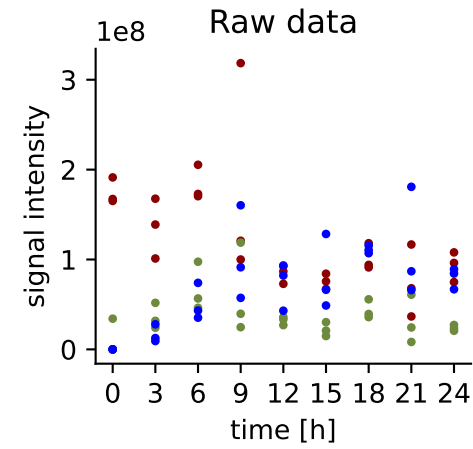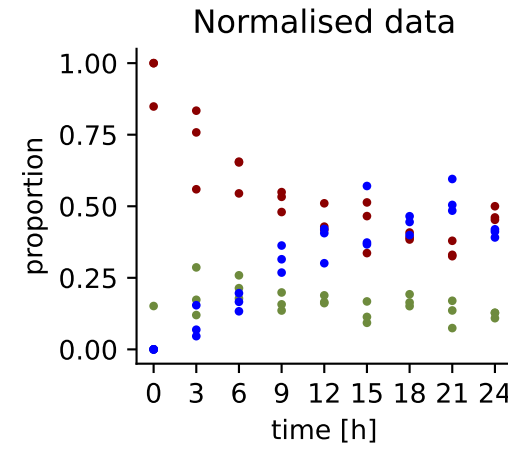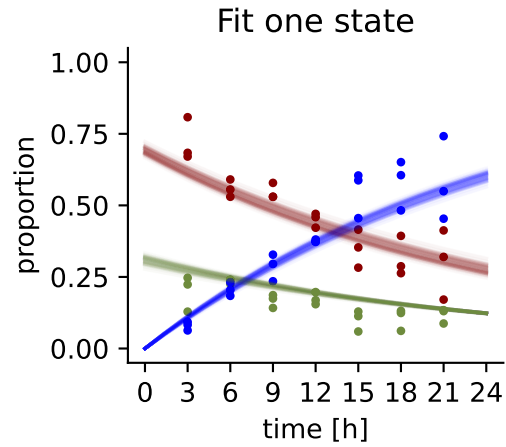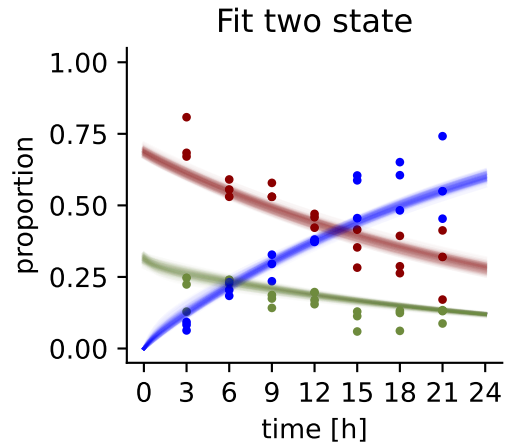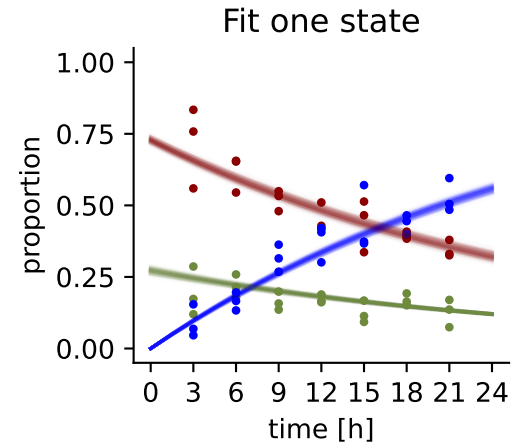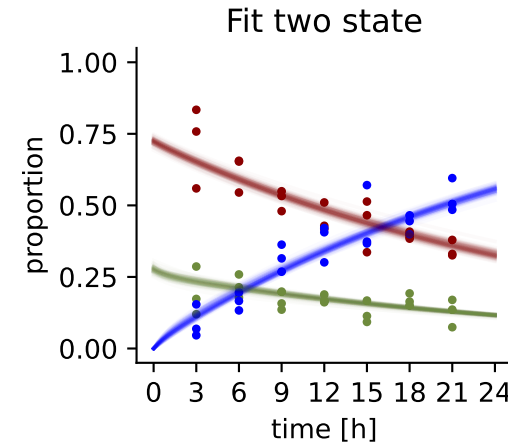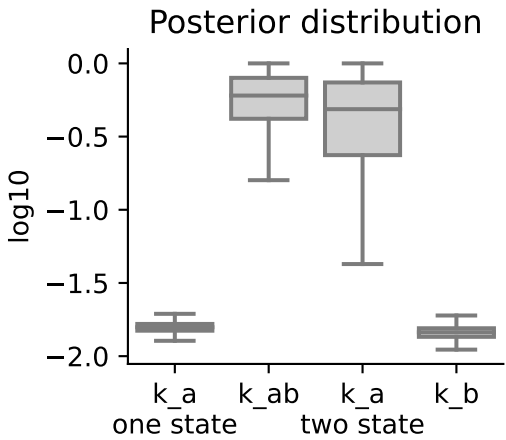

|                          |          |
|--------------------------|----------|
| p value                  | 3.37E-01 |
| log likelihood one state | 76.634   |
| log likelihood two state | 77.72    |
| rmse one state           | 0.419    |
| rmse two state           | 0.405    |
| k_a one state            | 0.016    |
| k_ab                     | 0.603    |
| k_a two state            | 0.487    |
| k_b                      | 0.015    |
| sigma one state          | 0.073    |
| sigma two state          | 0.072    |

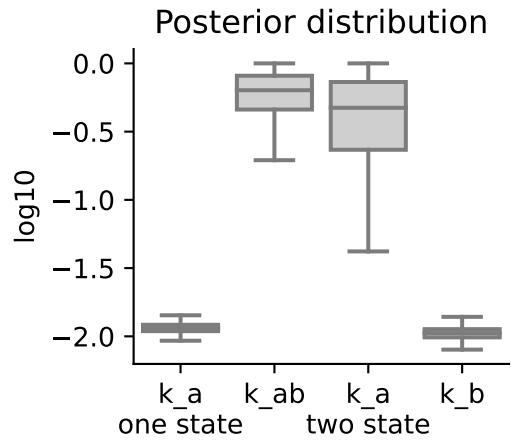

|                          |          |
|--------------------------|----------|
| p value                  | 5.23E-01 |
| log likelihood one state | 89.227   |
| log likelihood two state | 89.875   |
| rmse one state           | 0.365    |
| rmse two state           | 0.35     |
| k_a one state            | 0.012    |
| k_ab                     | 0.636    |
| k_a two state            | 0.473    |
| k_b                      | 0.011    |
| sigma one state          | 0.06     |
| sigma two state          | 0.059    |

uL11m  
MRPL11  
Q9Y3B7  
39S ribosomal protein L11, mitochondrial

Cell lysate

Mitochondria

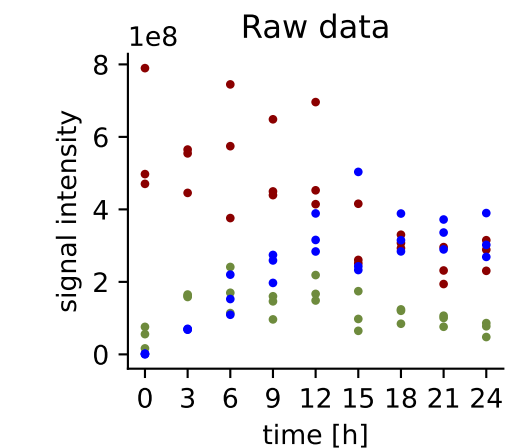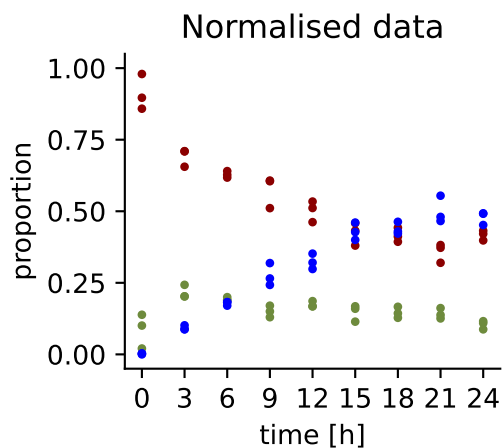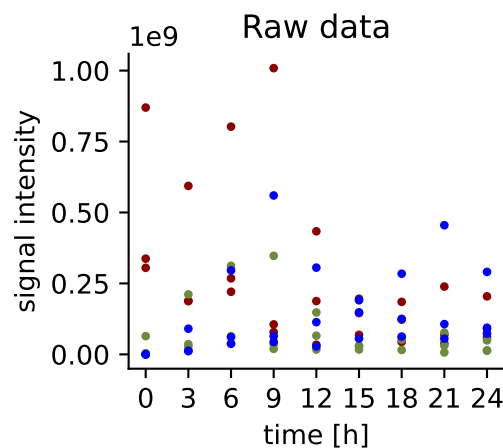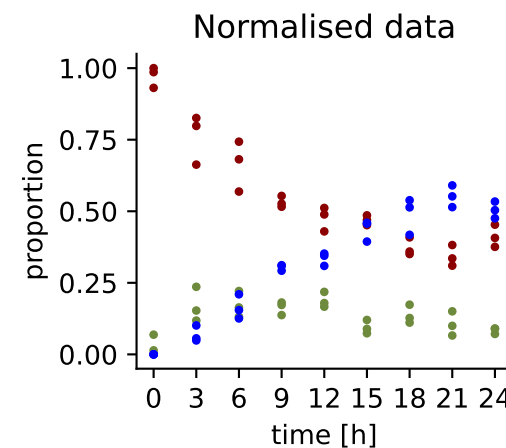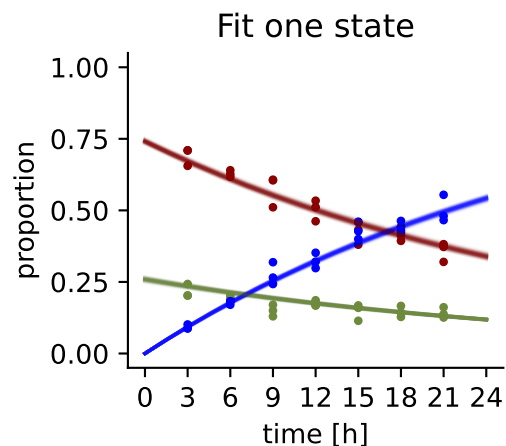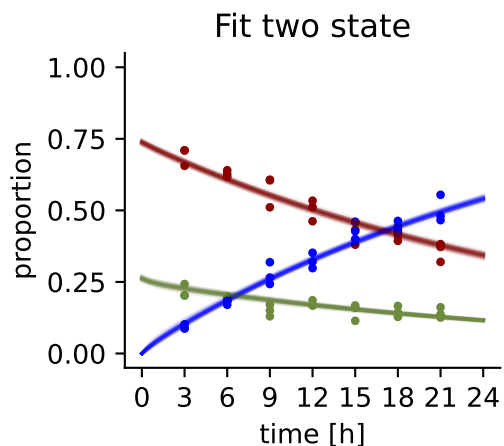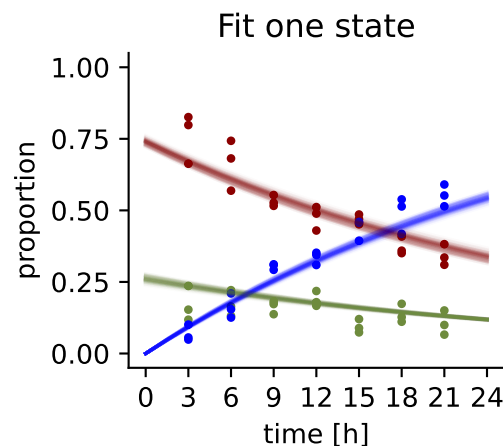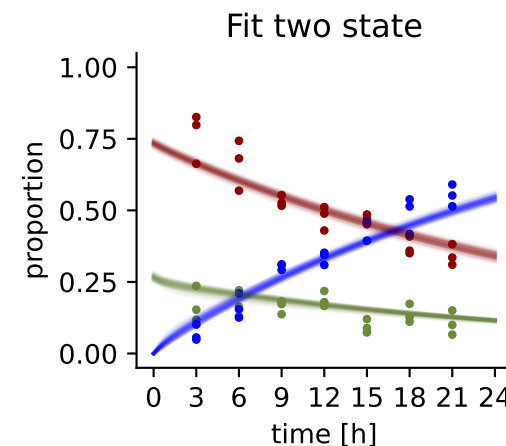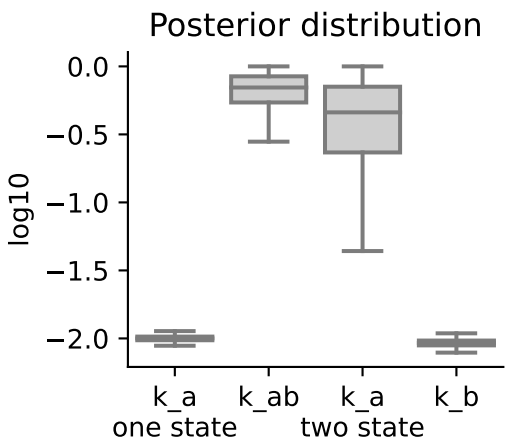

|                          |          |
|--------------------------|----------|
| p value                  | 2.82E-01 |
| log likelihood one state | 130.818  |
| log likelihood two state | 132.084  |
| rmse one state           | 0.34     |
| rmse two state           | 0.33     |
| k_a one state            | 0.01     |
| k_ab                     | 0.699    |
| k_a two state            | 0.459    |
| k_b                      | 0.009    |
| sigma one state          | 0.031    |
| sigma two state          | 0.031    |

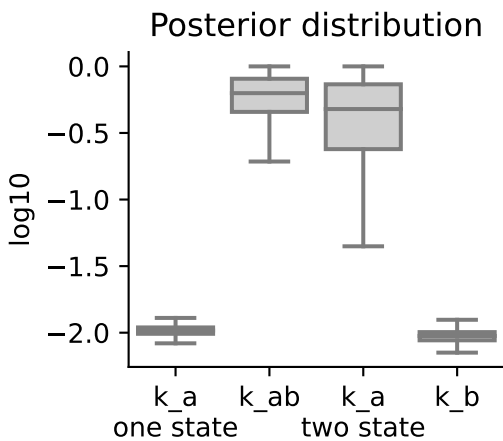

|                          |          |
|--------------------------|----------|
| p value                  | 4.01E-01 |
| log likelihood one state | 92.416   |
| log likelihood two state | 93.329   |
| rmse one state           | 0.375    |
| rmse two state           | 0.366    |
| k_a one state            | 0.01     |
| k_ab                     | 0.63     |
| k_a two state            | 0.478    |
| k_b                      | 0.009    |
| sigma one state          | 0.057    |
| sigma two state          | 0.056    |

bL12m  
MRPL12  
P52815  
39S ribosomal protein L12, mitochondrial

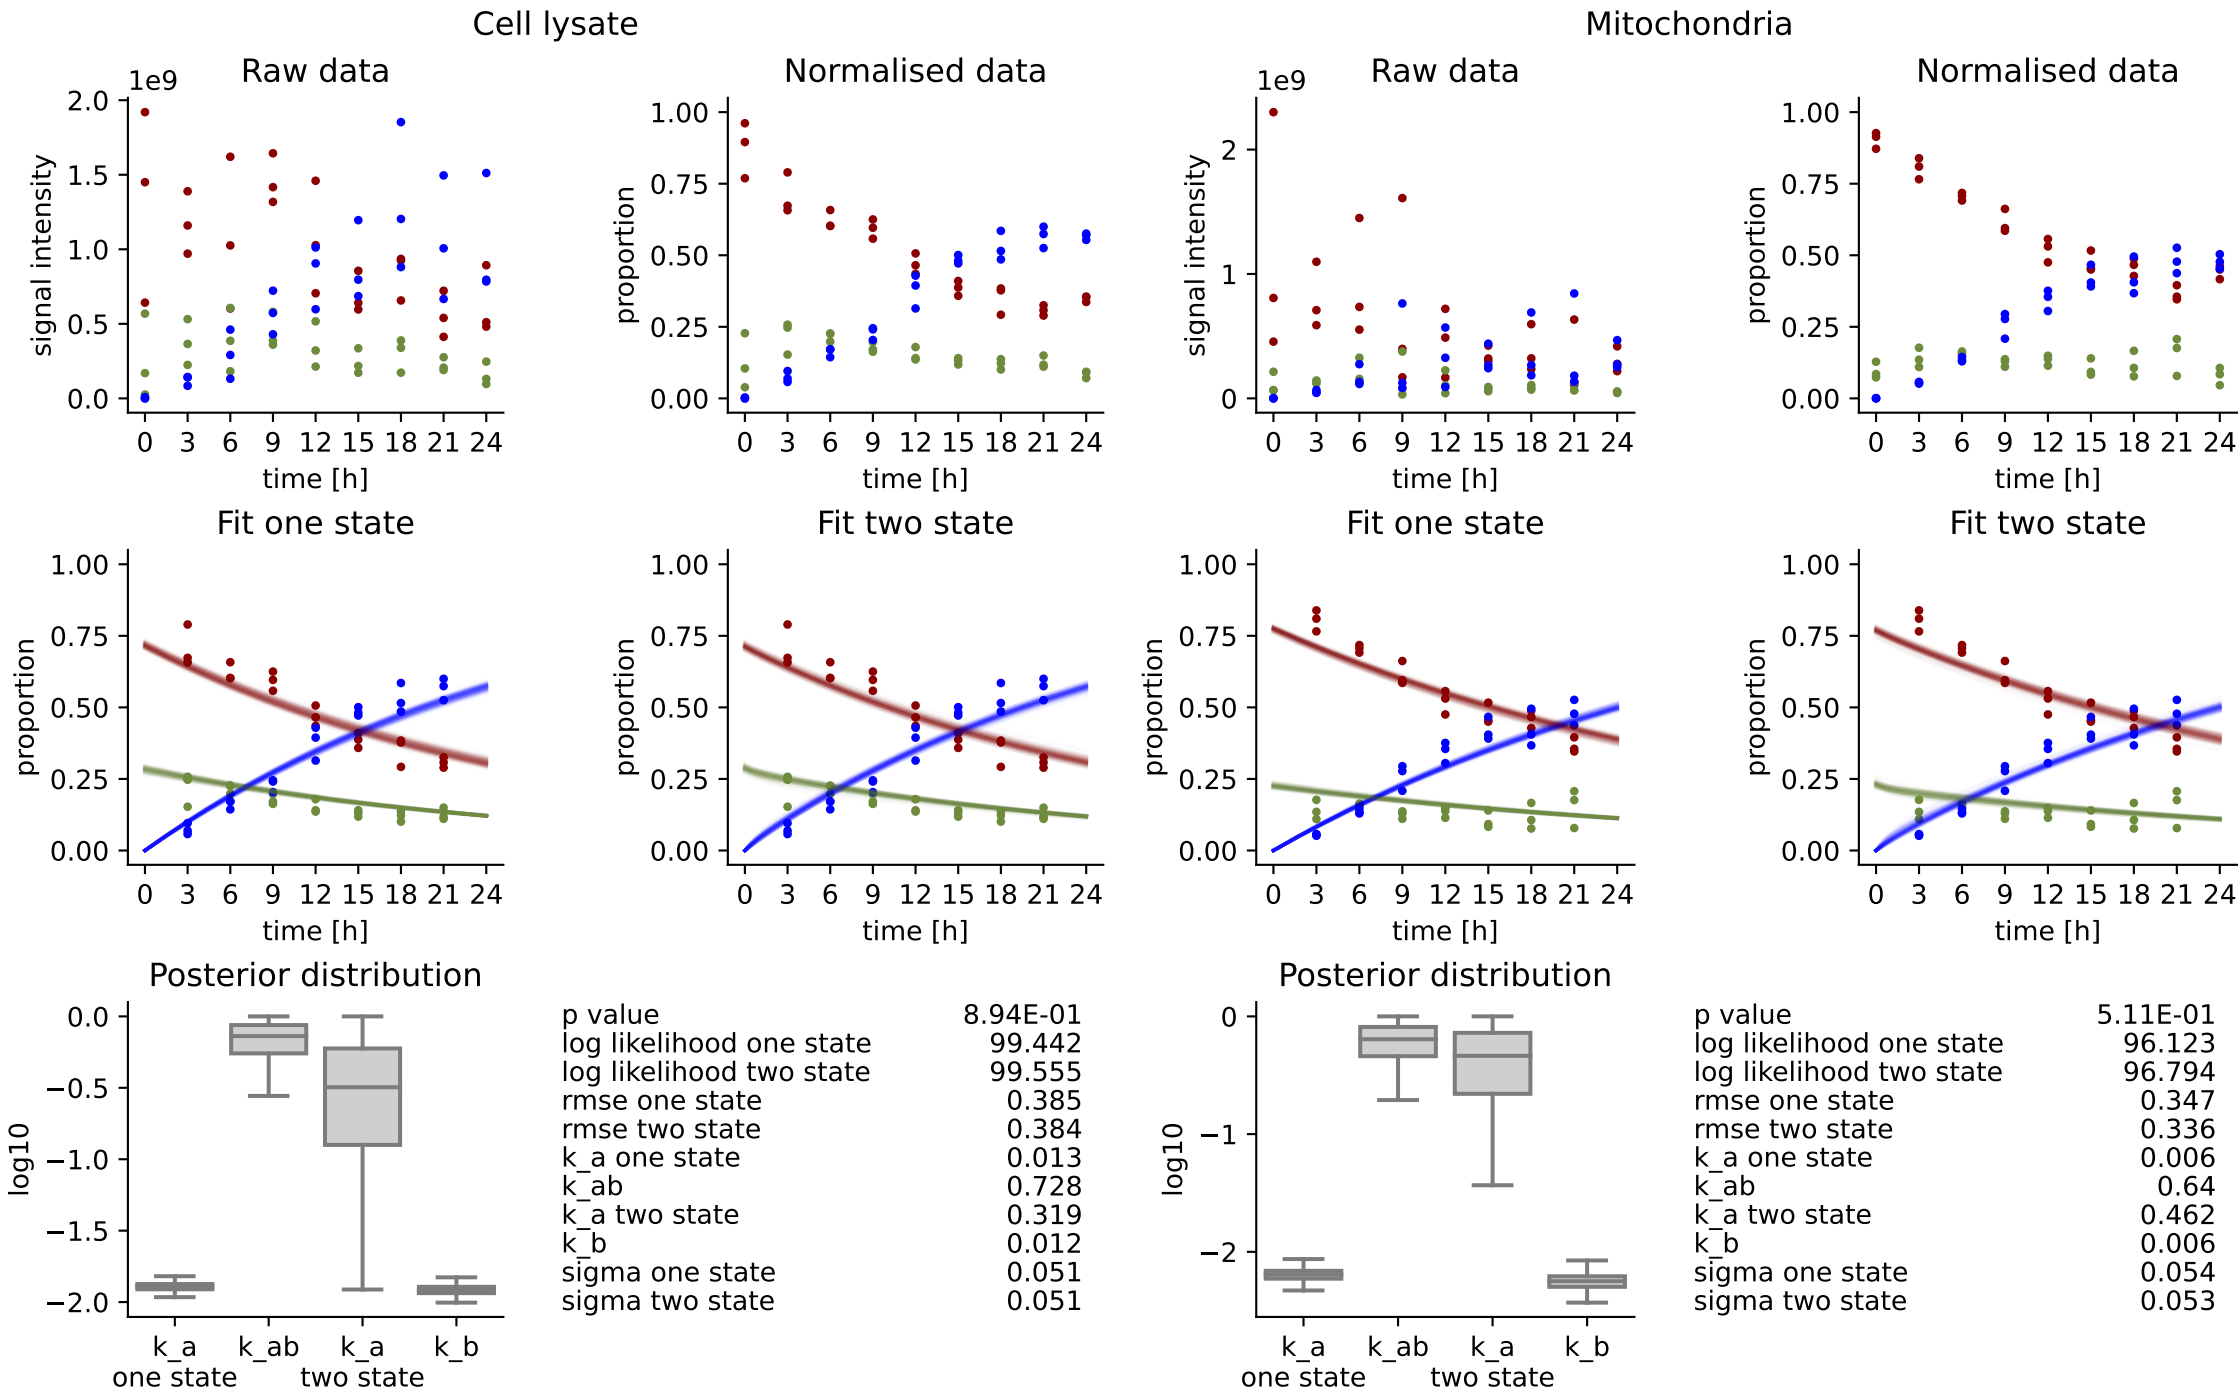

uL13m  
MRPL13  
Q9BYD1  
39S ribosomal protein L13, mitochondrial

Cell lysate

Mitochondria

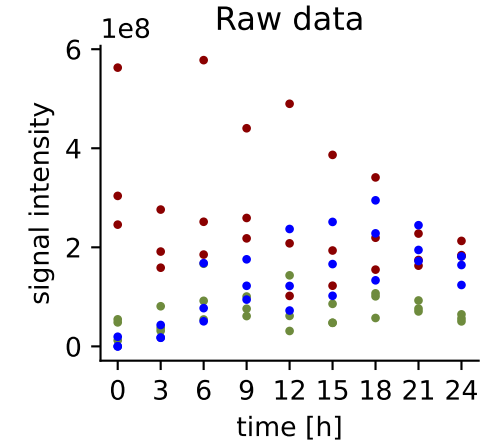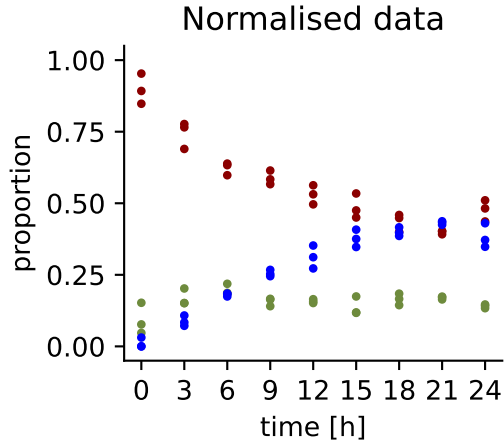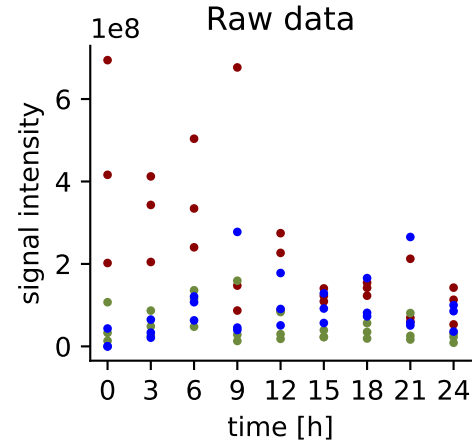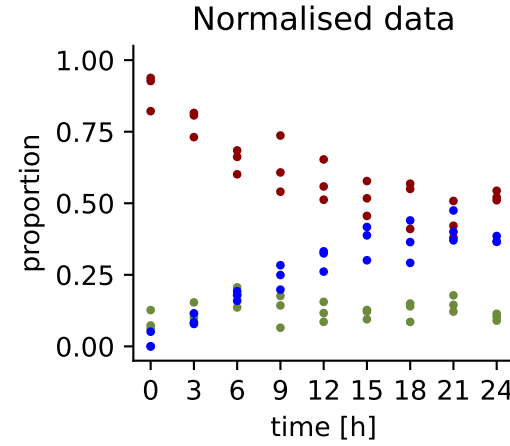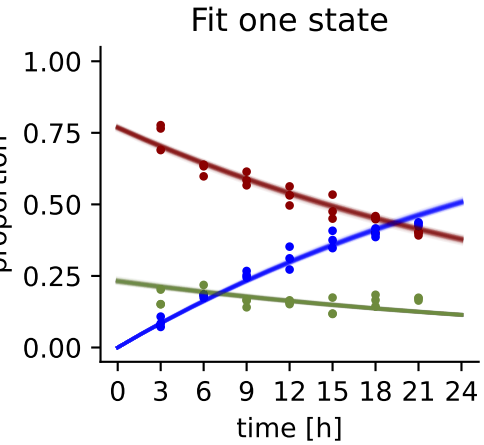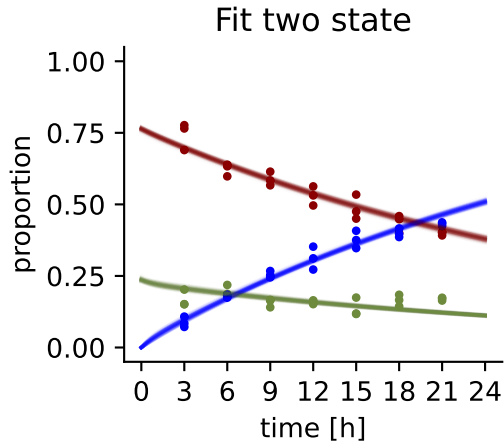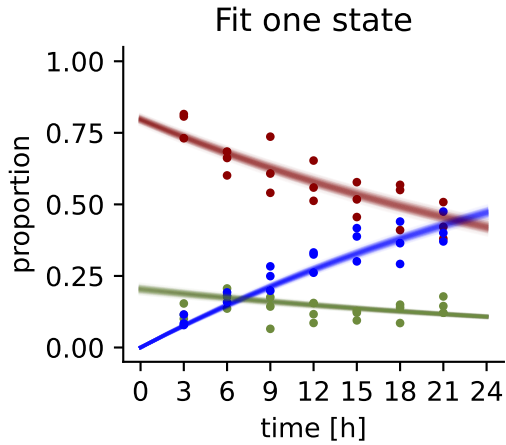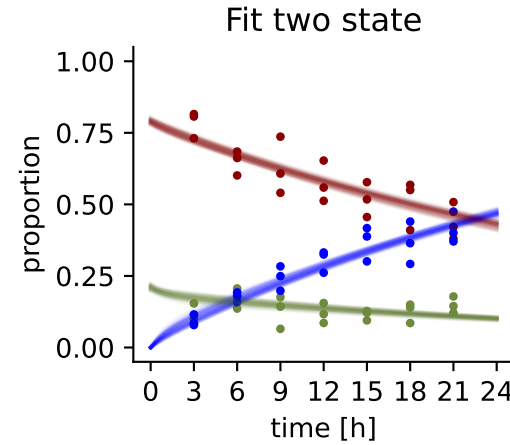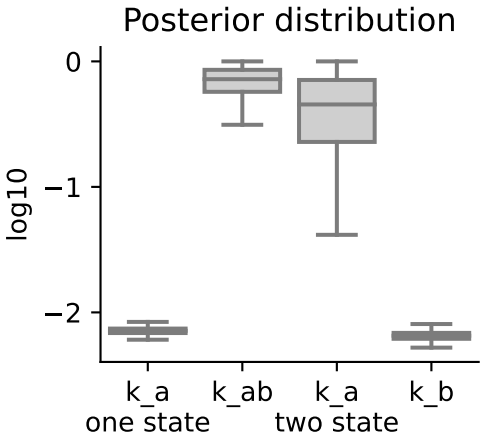

|                          |          |
|--------------------------|----------|
| p value                  | 4.45E-01 |
| log likelihood one state | 130.478  |
| log likelihood two state | 131.286  |
| rmse one state           | 0.312    |
| rmse two state           | 0.301    |
| k_a one state            | 0.007    |
| k_ab                     | 0.721    |
| k_a two state            | 0.454    |
| k_b                      | 0.007    |
| sigma one state          | 0.031    |
| sigma two state          | 0.031    |

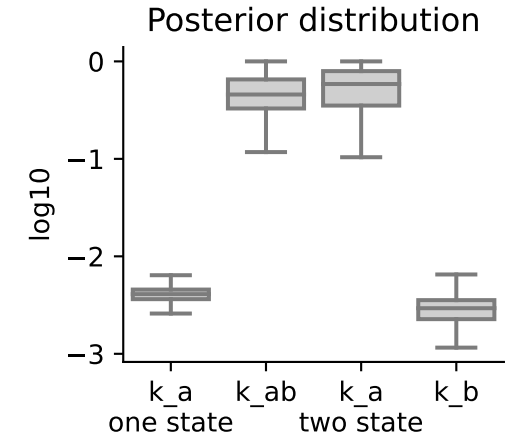

|                          |          |
|--------------------------|----------|
| p value                  | 7.45E-02 |
| log likelihood one state | 96.916   |
| log likelihood two state | 99.514   |
| rmse one state           | 0.31     |
| rmse two state           | 0.28     |
| k_a one state            | 0.004    |
| k_ab                     | 0.457    |
| k_a two state            | 0.586    |
| k_b                      | 0.003    |
| sigma one state          | 0.053    |
| sigma two state          | 0.051    |

uL14m  
MRPL14  
Q6P1L8  
39S ribosomal protein L14, mitochondrial

Cell lysate

Mitochondria

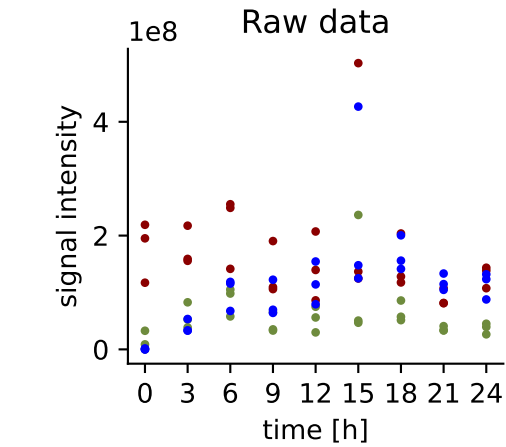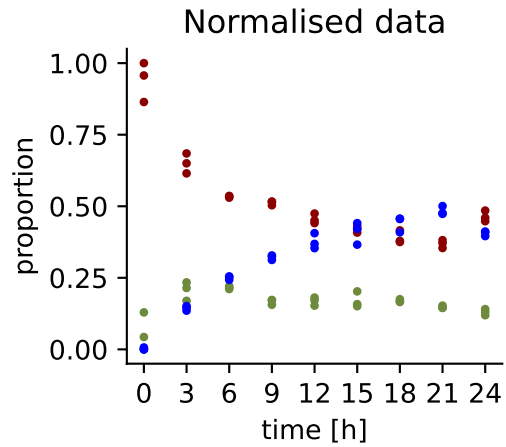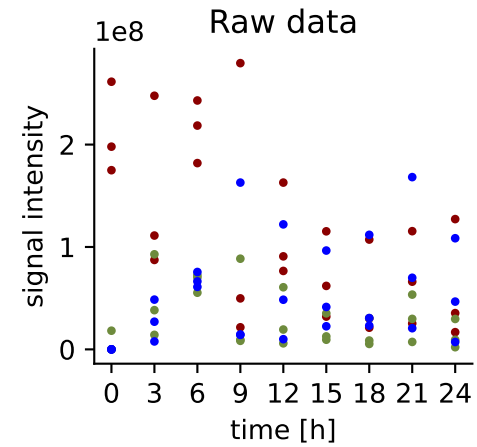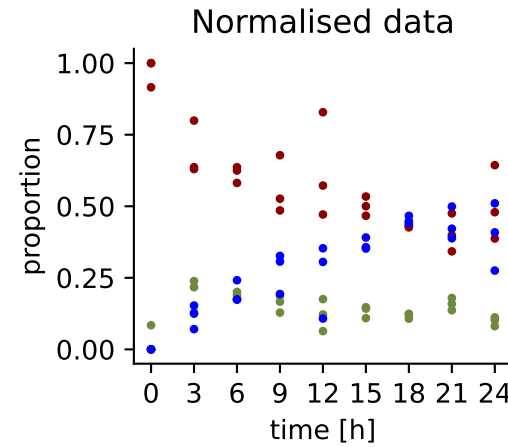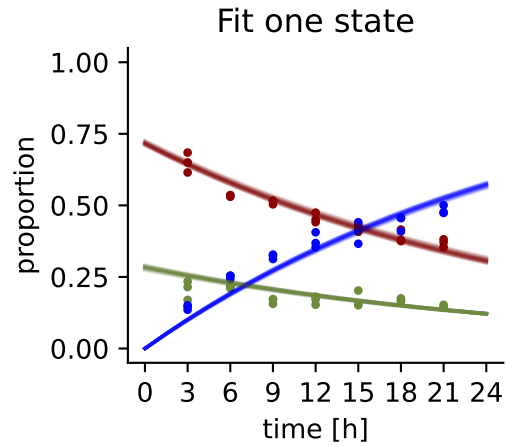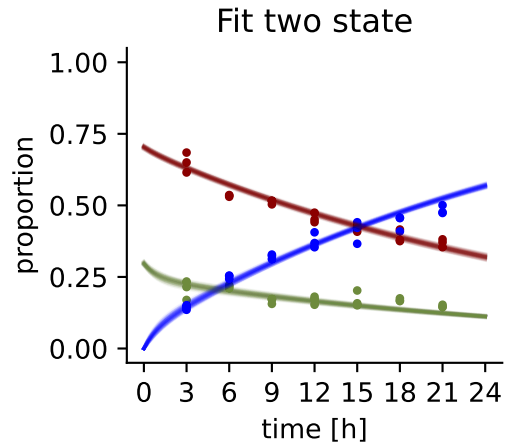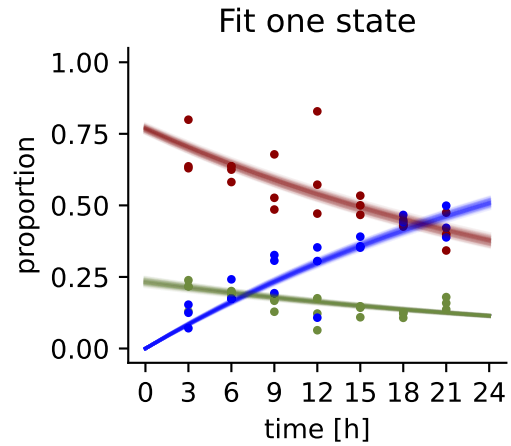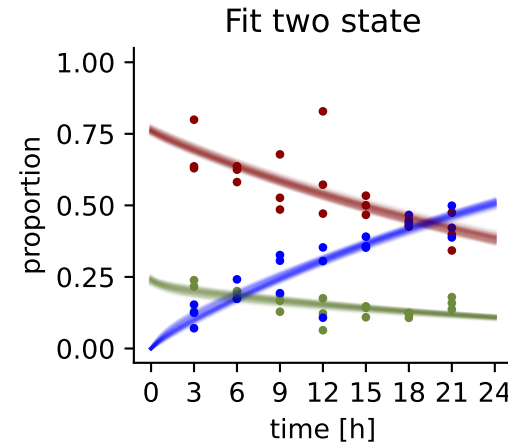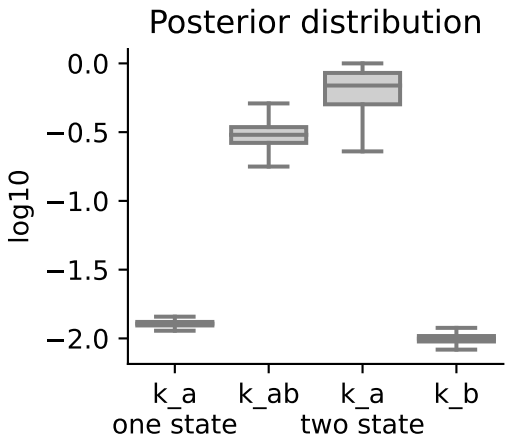

|                          |          |
|--------------------------|----------|
| p value                  | 1.12E-07 |
| log likelihood one state | 122.816  |
| log likelihood two state | 138.818  |
| rmse one state           | 0.341    |
| rmse two state           | 0.292    |
| k_a one state            | 0.013    |
| k_ab                     | 0.303    |
| k_a two state            | 0.69     |
| k_b                      | 0.01     |
| sigma one state          | 0.035    |
| sigma two state          | 0.028    |

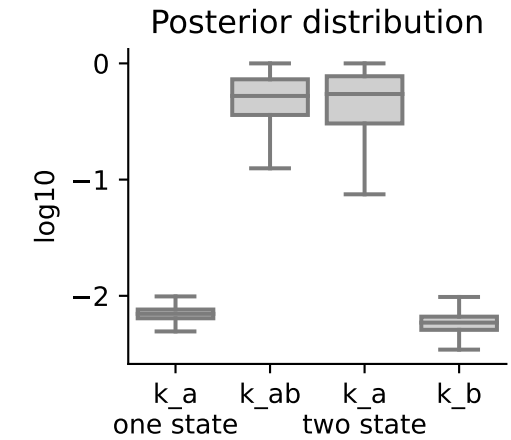

|                          |          |
|--------------------------|----------|
| p value                  | 2.32E-01 |
| log likelihood one state | 83.532   |
| log likelihood two state | 84.991   |
| rmse one state           | 0.327    |
| rmse two state           | 0.298    |
| k_a one state            | 0.007    |
| k_ab                     | 0.525    |
| k_a two state            | 0.545    |
| k_b                      | 0.006    |
| sigma one state          | 0.065    |
| sigma two state          | 0.064    |

uL15m  
MRPL15  
Q9P015  
39S ribosomal protein L15, mitochondrial

Cell lysate

Mitochondria

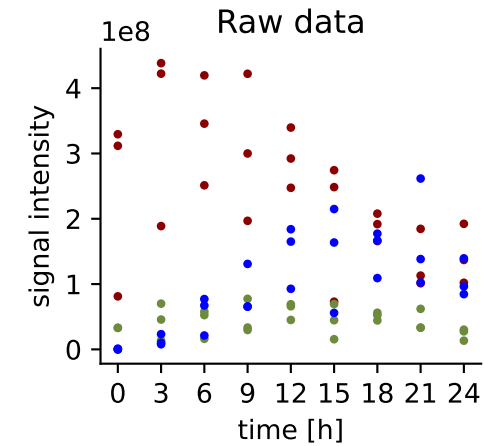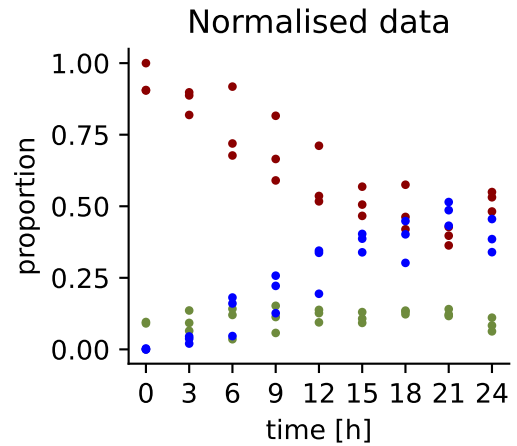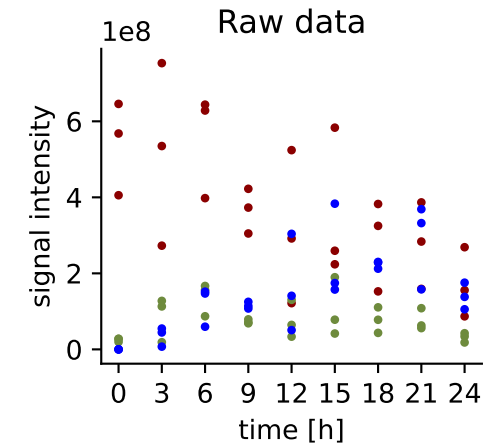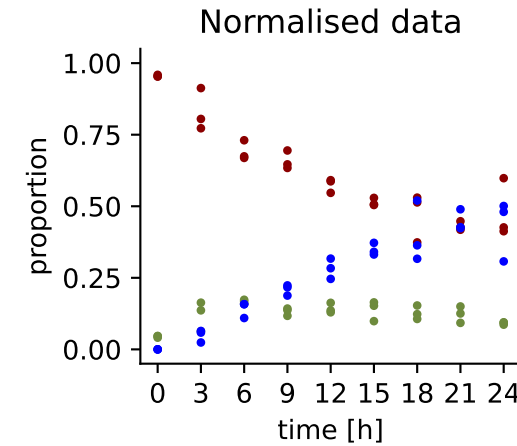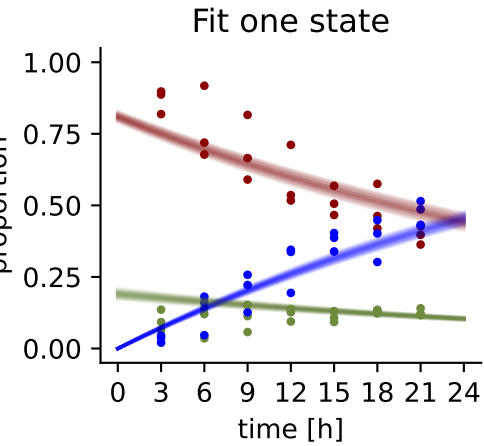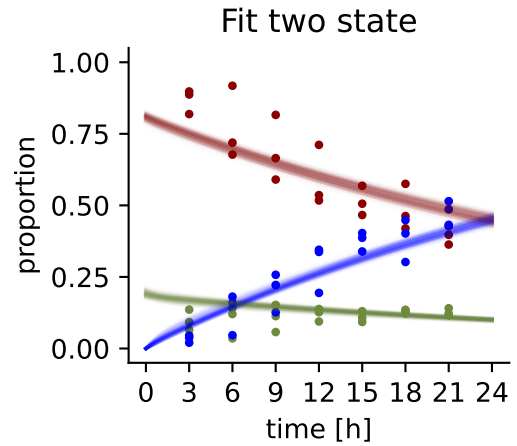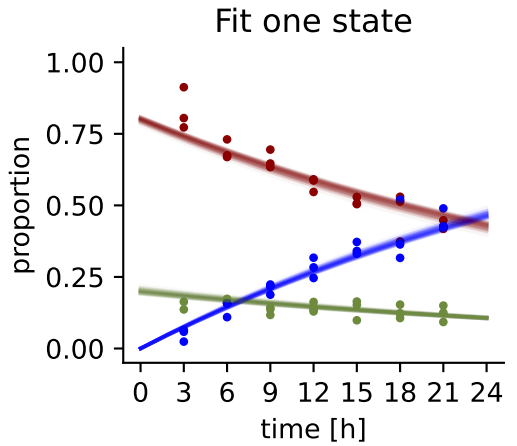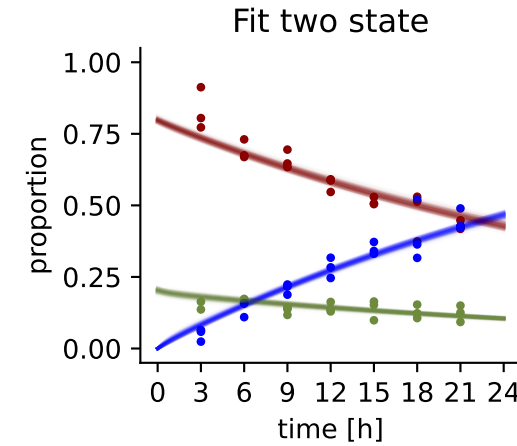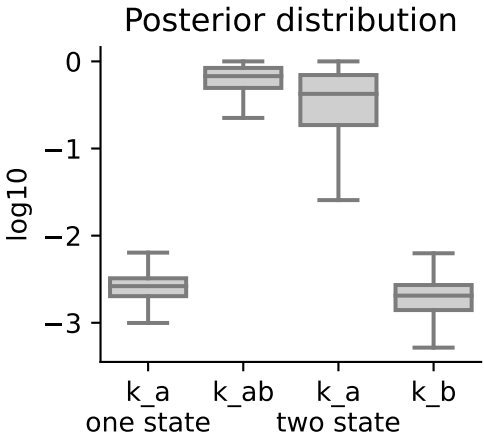

|                          |          |
|--------------------------|----------|
| p value                  | 9.89E-01 |
| log likelihood one state | 75.09    |
| log likelihood two state | 75.101   |
| rmse one state           | 0.34     |
| rmse two state           | 0.337    |
| k_a one state            | 0.003    |
| k_ab                     | 0.677    |
| k_a two state            | 0.424    |
| k_b                      | 0.002    |
| sigma one state          | 0.075    |
| sigma two state          | 0.075    |

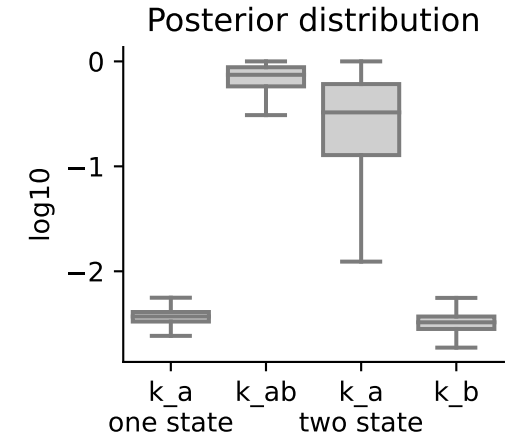

|                          |          |
|--------------------------|----------|
| p value                  | 9.35E-01 |
| log likelihood one state | 104.791  |
| log likelihood two state | 104.858  |
| rmse one state           | 0.313    |
| rmse two state           | 0.314    |
| k_a one state            | 0.004    |
| k_ab                     | 0.745    |
| k_a two state            | 0.327    |
| k_b                      | 0.003    |
| sigma one state          | 0.047    |
| sigma two state          | 0.047    |



uL16m  
MRPL16  
Q9NX20  
39S ribosomal protein L16, mitochondrial

Cell lysate

Mitochondria

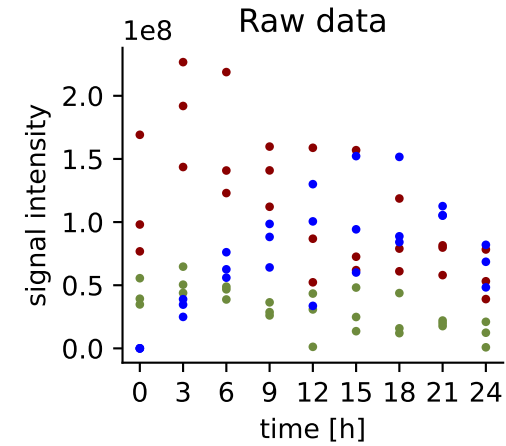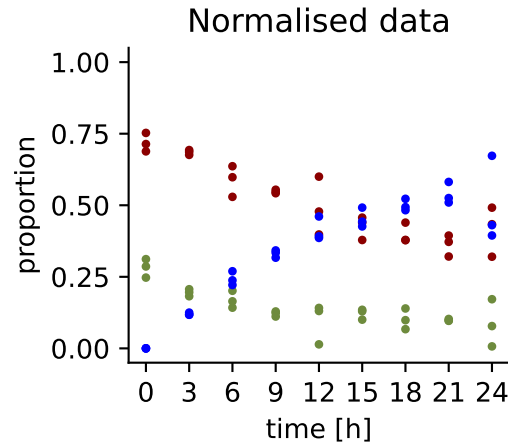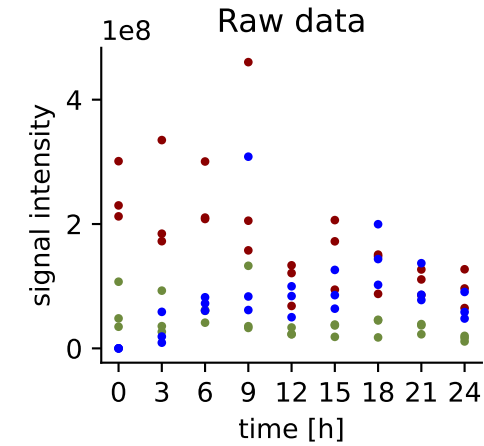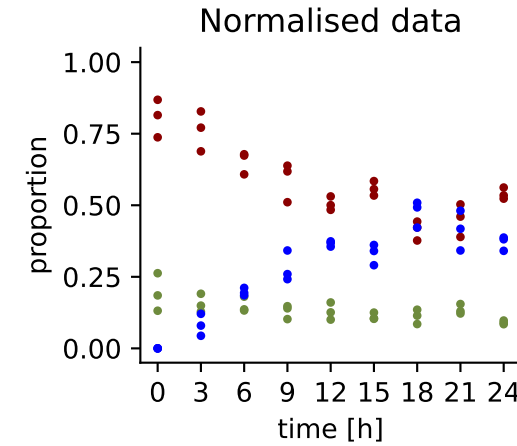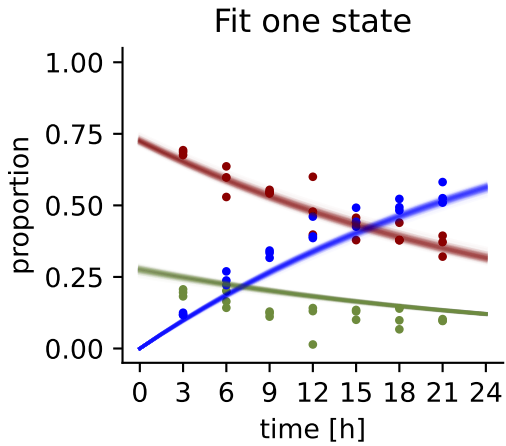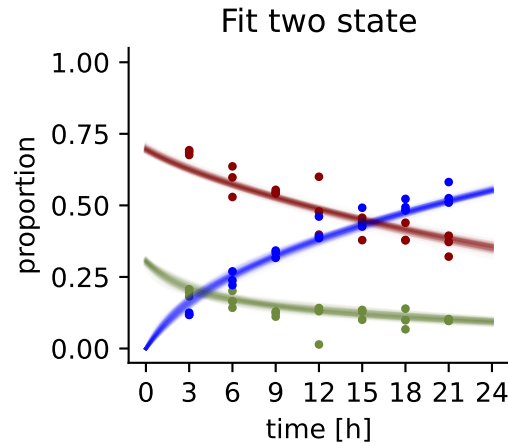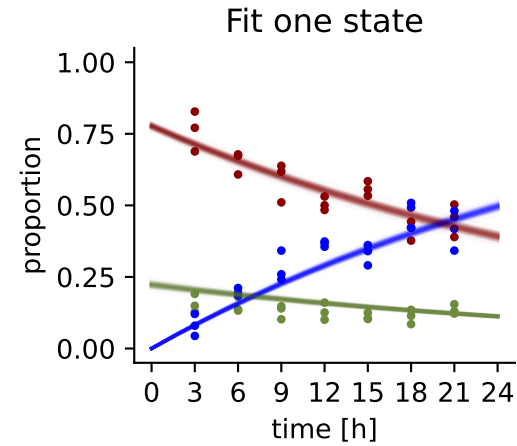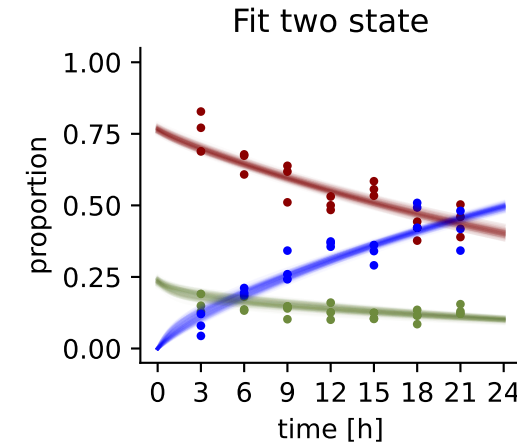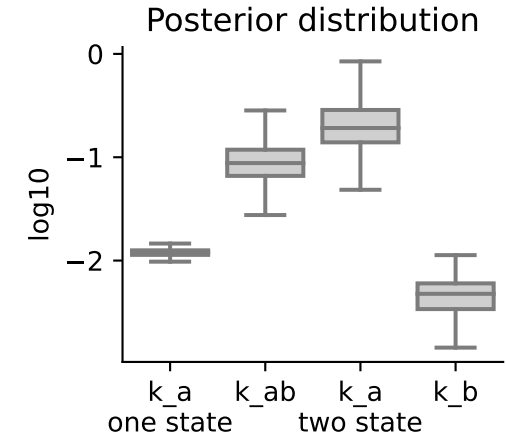

|                          |          |
|--------------------------|----------|
| p value                  | 2.28E-10 |
| log likelihood one state | 92.396   |
| log likelihood two state | 114.599  |
| rmse one state           | 0.384    |
| rmse two state           | 0.33     |
| k_a one state            | 0.012    |
| k_ab                     | 0.088    |
| k_a two state            | 0.192    |
| k_b                      | 0.005    |
| sigma one state          | 0.057    |
| sigma two state          | 0.041    |

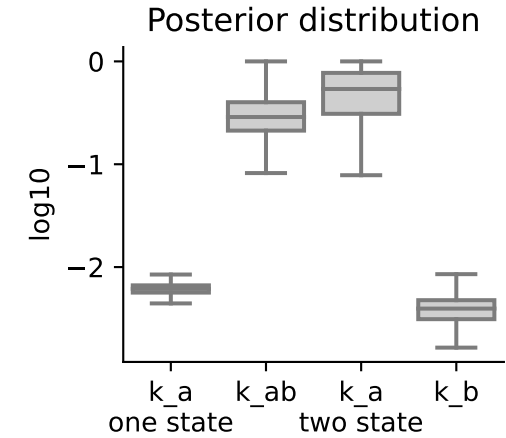

|                          |          |
|--------------------------|----------|
| p value                  | 2.90E-03 |
| log likelihood one state | 95.829   |
| log likelihood two state | 101.671  |
| rmse one state           | 0.331    |
| rmse two state           | 0.298    |
| k_a one state            | 0.006    |
| k_ab                     | 0.288    |
| k_a two state            | 0.539    |
| k_b                      | 0.004    |
| sigma one state          | 0.054    |
| sigma two state          | 0.05     |

bL17m  
MRPL17  
Q9NRX2  
39S ribosomal protein L17, mitochondrial

Cell lysate

Mitochondria

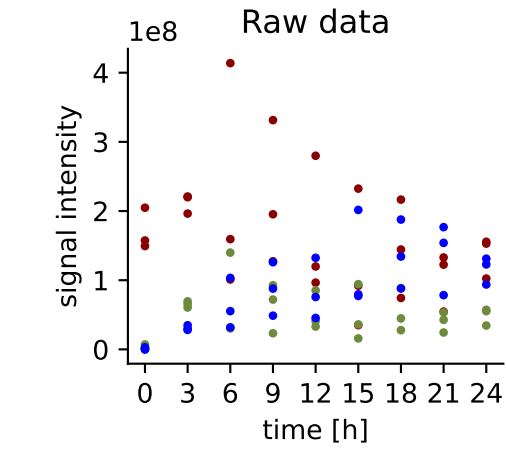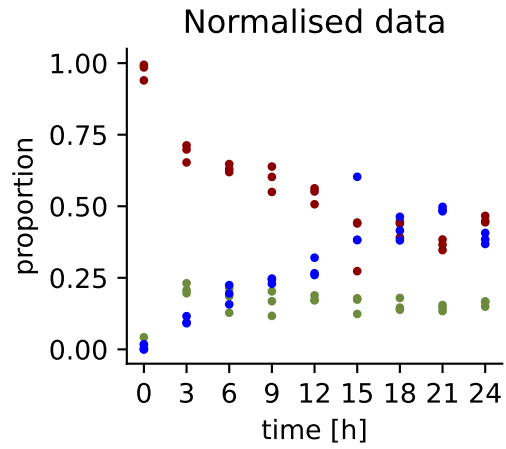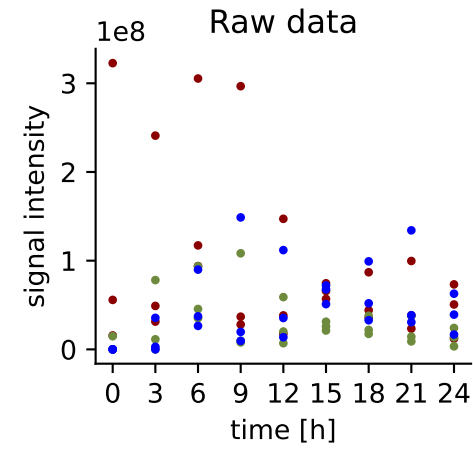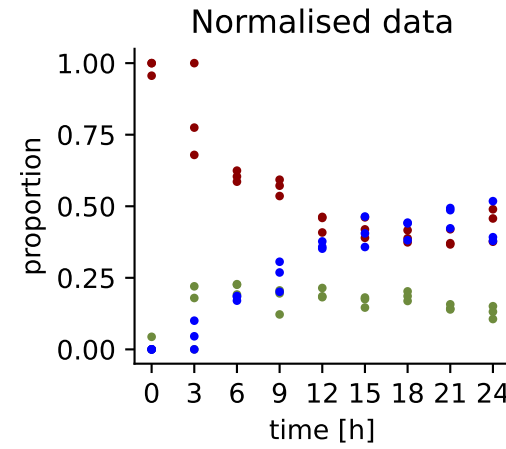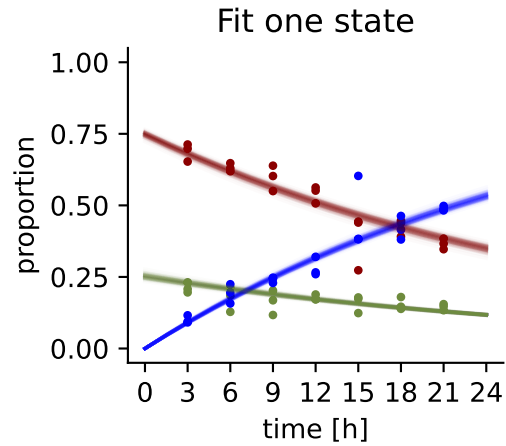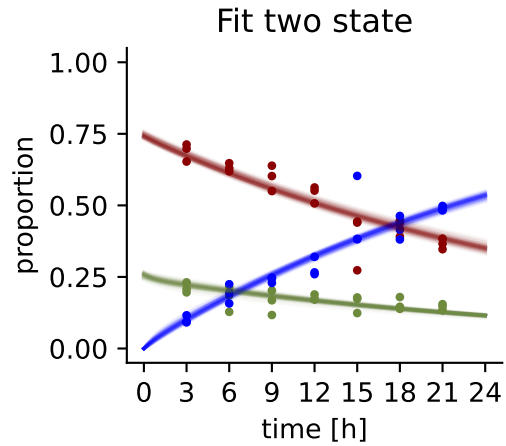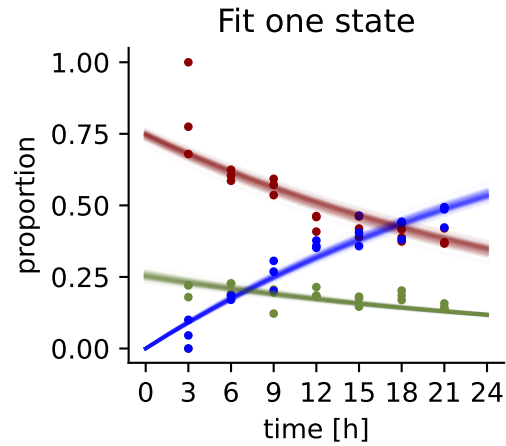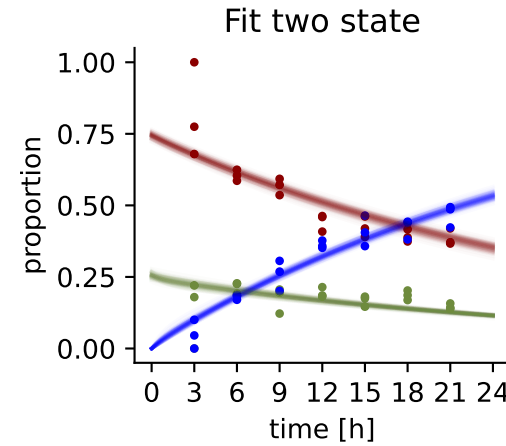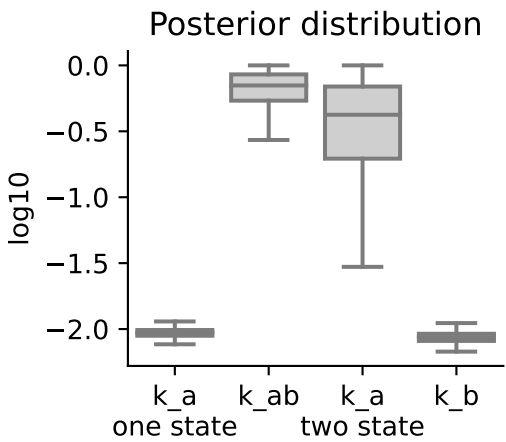

|                          |          |
|--------------------------|----------|
| p value                  | 7.88E-01 |
| log likelihood one state | 103.064  |
| log likelihood two state | 103.303  |
| rmse one state           | 0.338    |
| rmse two state           | 0.329    |
| k_a one state            | 0.009    |
| k_ab                     | 0.704    |
| k_a two state            | 0.422    |
| k_b                      | 0.009    |
| sigma one state          | 0.048    |
| sigma two state          | 0.048    |

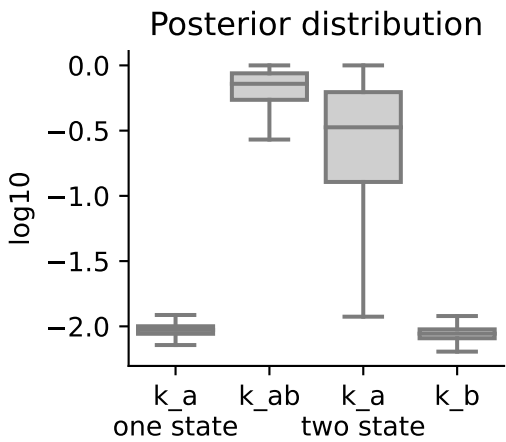

|                          |          |
|--------------------------|----------|
| p value                  | 6.36E-01 |
| log likelihood one state | 84.429   |
| log likelihood two state | 84.881   |
| rmse one state           | 0.35     |
| rmse two state           | 0.354    |
| k_a one state            | 0.009    |
| k_ab                     | 0.723    |
| k_a two state            | 0.335    |
| k_b                      | 0.009    |
| sigma one state          | 0.064    |
| sigma two state          | 0.065    |

uL18m  
MRPL18  
Q9H0U6  
39S ribosomal protein L18, mitochondrial

Cell lysate

Mitochondria

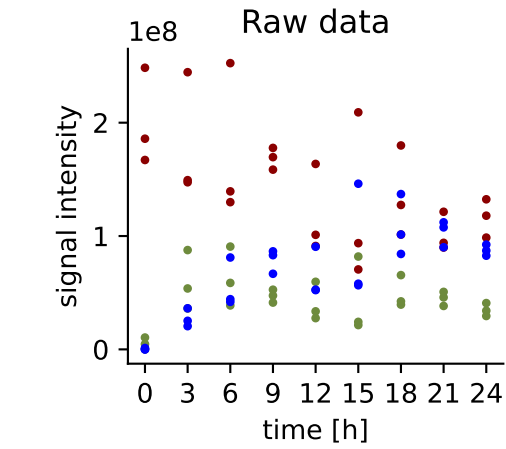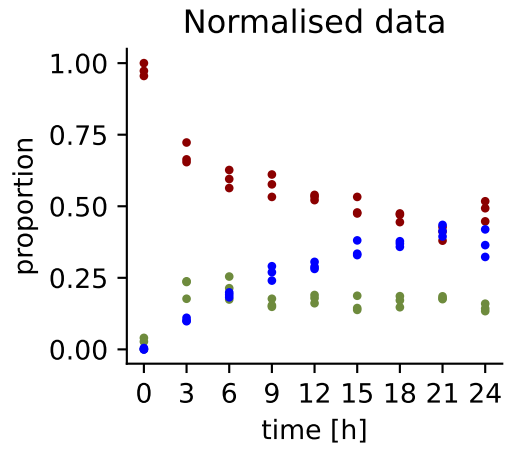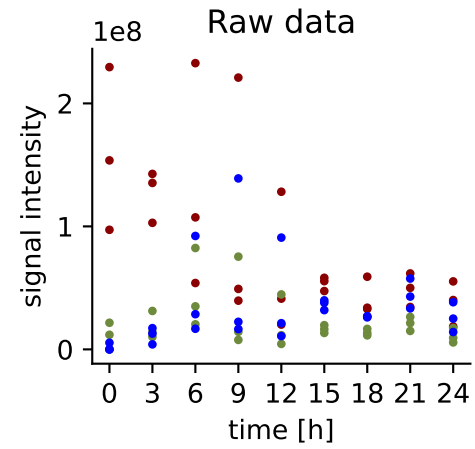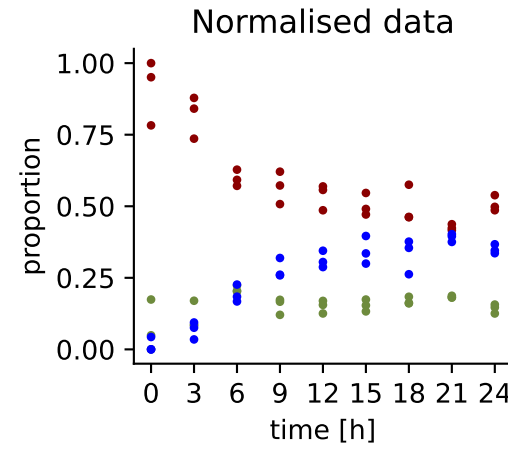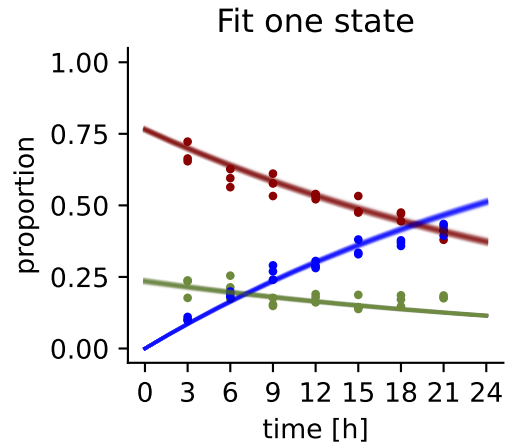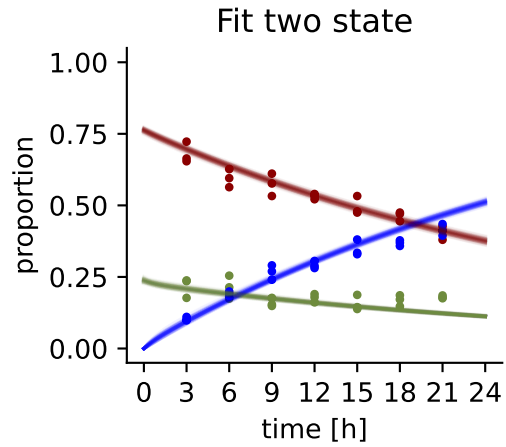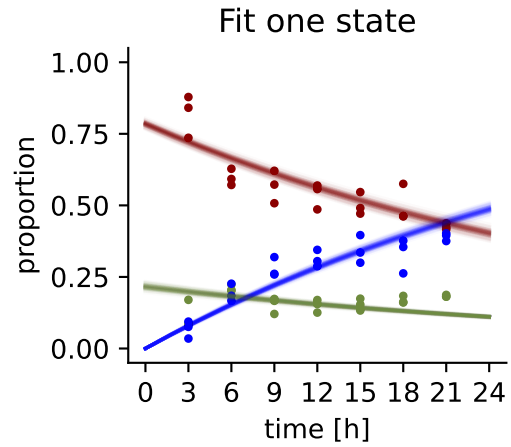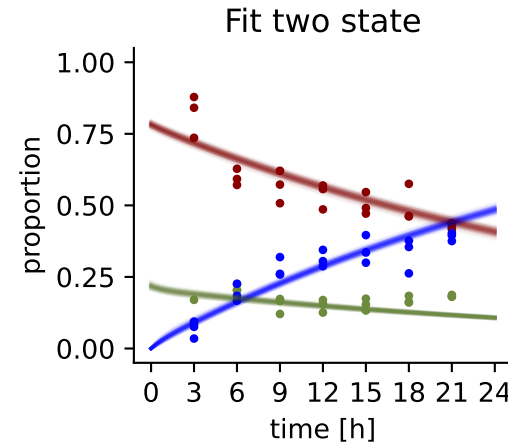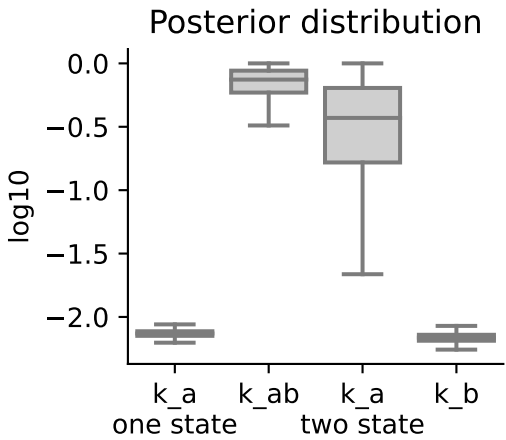

|                          |          |
|--------------------------|----------|
| p value                  | 7.86E-01 |
| log likelihood one state | 125.155  |
| log likelihood two state | 125.395  |
| rmse one state           | 0.293    |
| rmse two state           | 0.286    |
| k_a one state            | 0.007    |
| k_ab                     | 0.745    |
| k_a two state            | 0.371    |
| k_b                      | 0.007    |
| sigma one state          | 0.034    |
| sigma two state          | 0.034    |

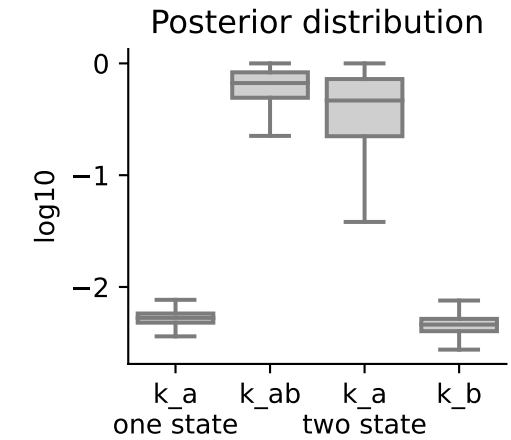

|                          |          |
|--------------------------|----------|
| p value                  | 7.23E-01 |
| log likelihood one state | 92.685   |
| log likelihood two state | 93.009   |
| rmse one state           | 0.302    |
| rmse two state           | 0.29     |
| k_a one state            | 0.005    |
| k_ab                     | 0.667    |
| k_a two state            | 0.465    |
| k_b                      | 0.005    |
| sigma one state          | 0.057    |
| sigma two state          | 0.056    |

bL19m  
MRPL19  
P49406  
39S ribosomal protein L19, mitochondrial

Cell lysate

Mitochondria

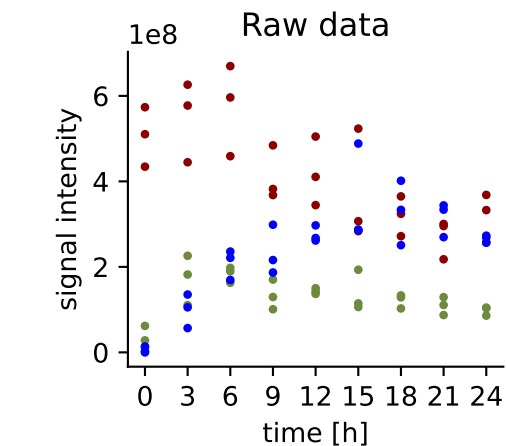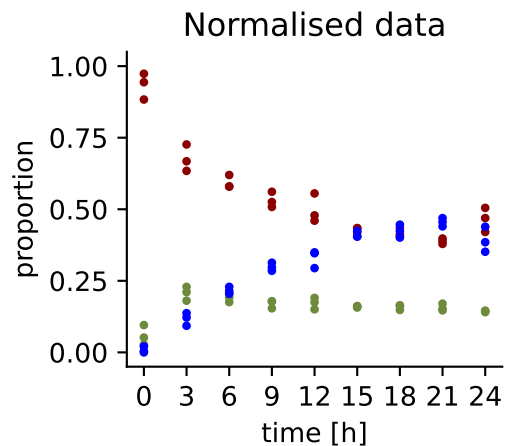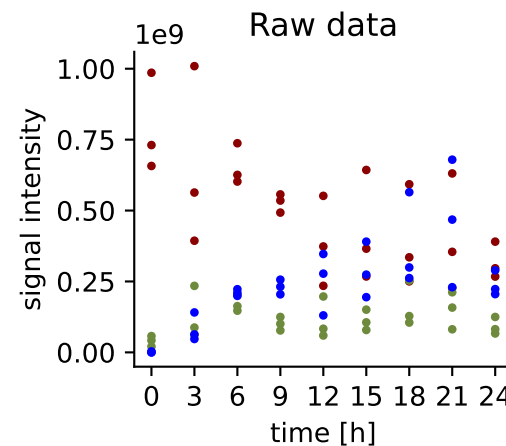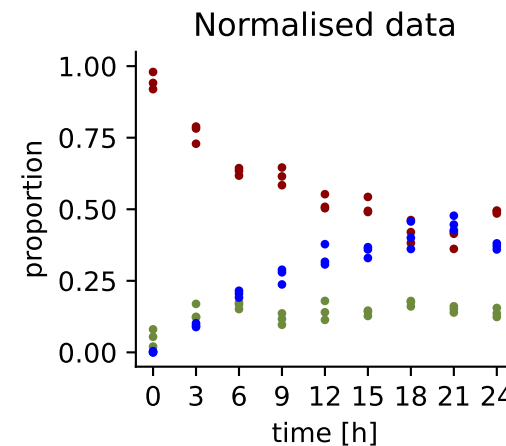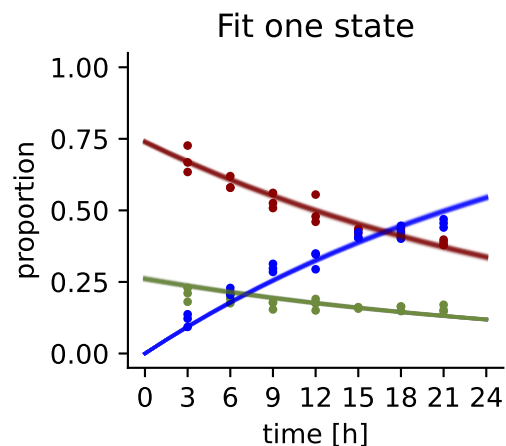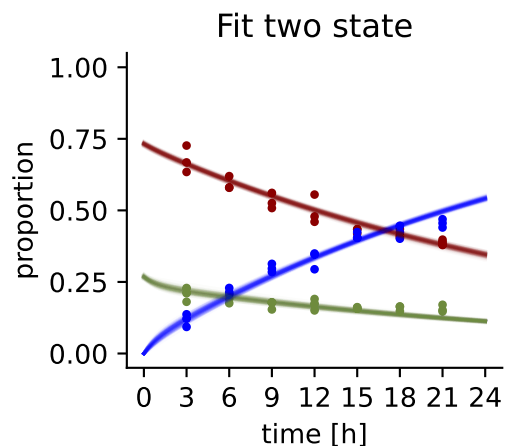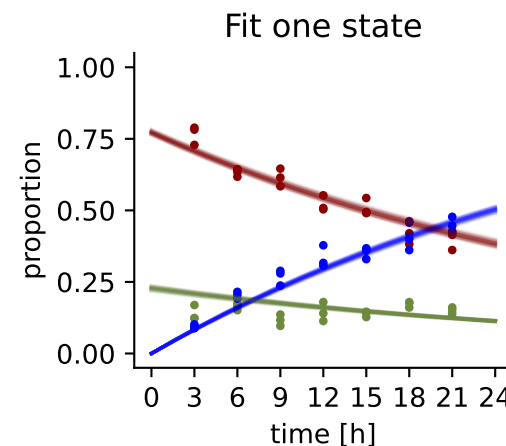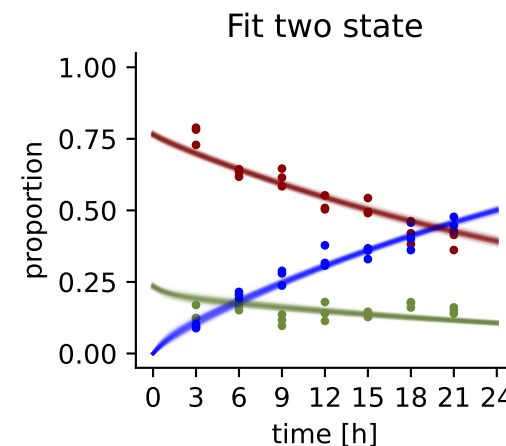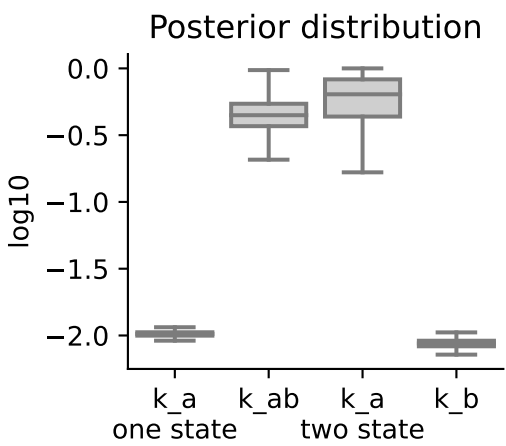

|                          |          |
|--------------------------|----------|
| p value                  | 5.53E-04 |
| log likelihood one state | 132.793  |
| log likelihood two state | 140.292  |
| rmse one state           | 0.326    |
| rmse two state           | 0.297    |
| k_a one state            | 0.01     |
| k_ab                     | 0.446    |
| k_a two state            | 0.64     |
| k_b                      | 0.009    |
| sigma one state          | 0.03     |
| sigma two state          | 0.027    |

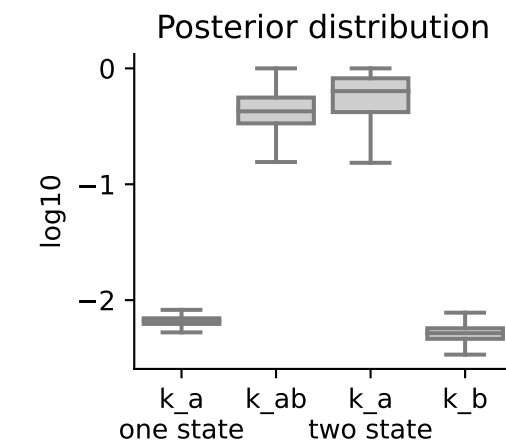

|                          |          |
|--------------------------|----------|
| p value                  | 9.32E-03 |
| log likelihood one state | 113.902  |
| log likelihood two state | 118.578  |
| rmse one state           | 0.323    |
| rmse two state           | 0.291    |
| k_a one state            | 0.007    |
| k_ab                     | 0.426    |
| k_a two state            | 0.636    |
| k_b                      | 0.005    |
| sigma one state          | 0.04     |
| sigma two state          | 0.038    |

bL20m  
MRPL20  
Q9BYC9  
39S ribosomal protein L20, mitochondrial

Cell lysate

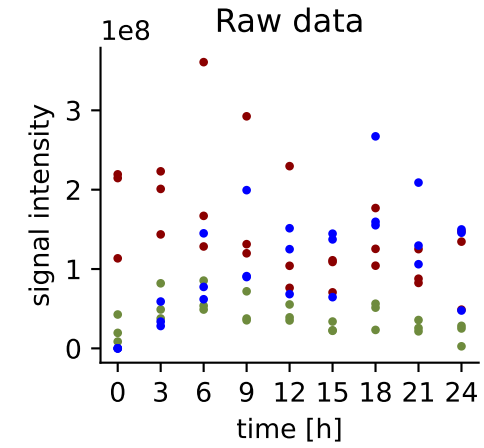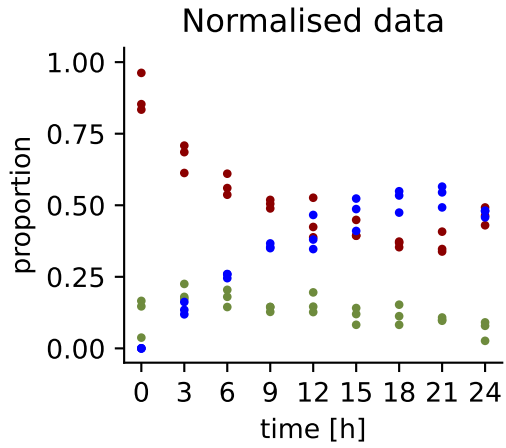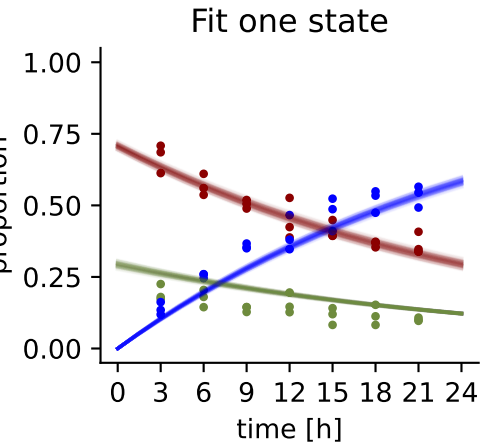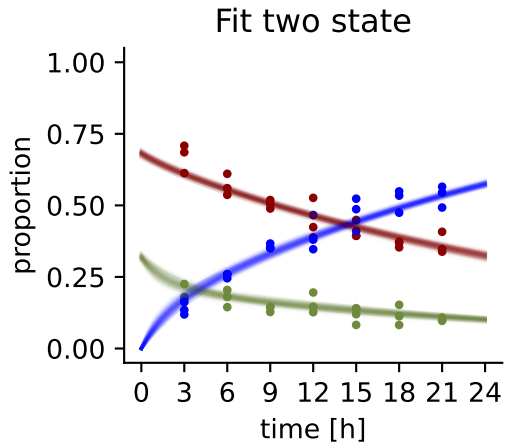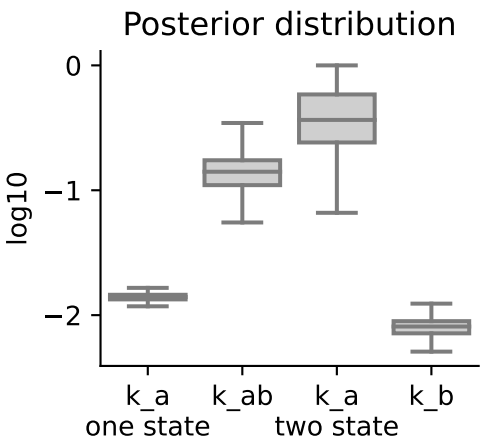

|                          |          |
|--------------------------|----------|
| p value                  | 1.50E-10 |
| log likelihood one state | 96.204   |
| log likelihood two state | 118.828  |
| rmse one state           | 0.387    |
| rmse two state           | 0.324    |
| k_a one state            | 0.014    |
| k_ab                     | 0.141    |
| k_a two state            | 0.366    |
| k_b                      | 0.008    |
| sigma one state          | 0.054    |
| sigma two state          | 0.038    |

Mitochondria

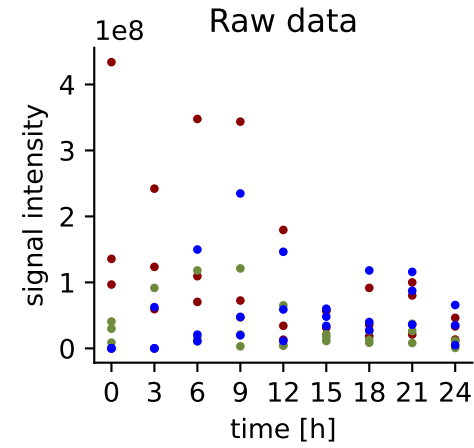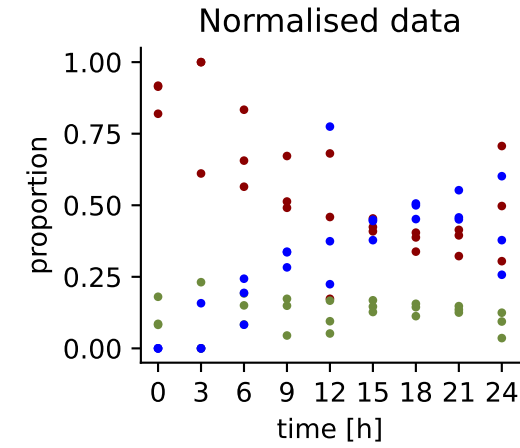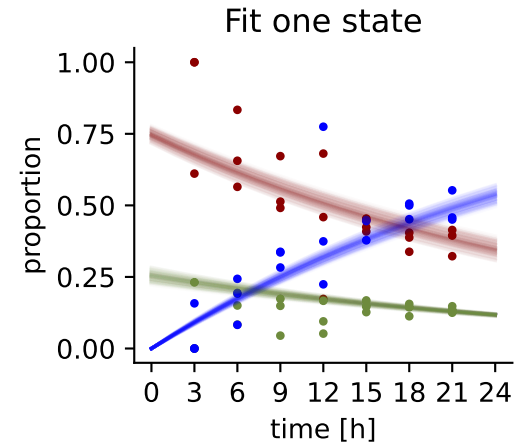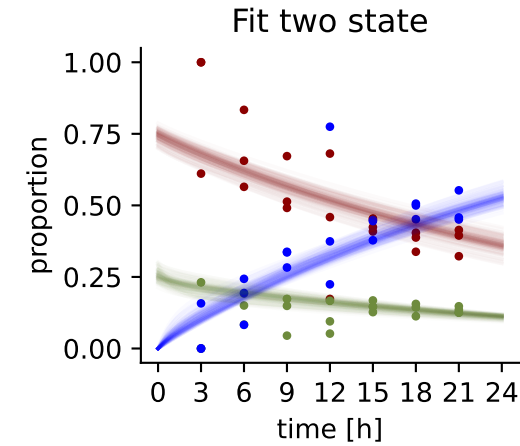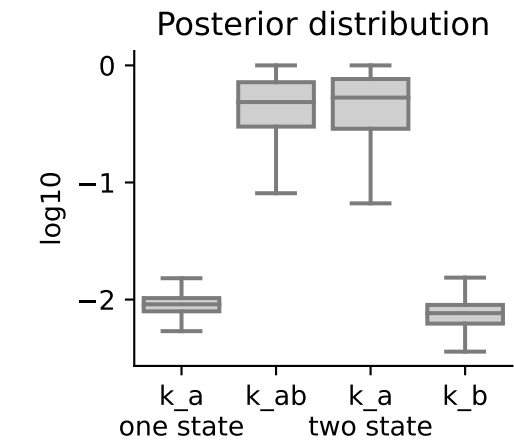

|                          |          |
|--------------------------|----------|
| p value                  | 3.63E-01 |
| log likelihood one state | 44.038   |
| log likelihood two state | 45.052   |
| rmse one state           | 0.422    |
| rmse two state           | 0.39     |
| k_a one state            | 0.009    |
| k_ab                     | 0.486    |
| k_a two state            | 0.531    |
| k_b                      | 0.008    |
| sigma one state          | 0.121    |
| sigma two state          | 0.12     |

bL21m  
MRPL21  
Q7Z2W9  
39S ribosomal protein L21, mitochondrial

Cell lysate

Mitochondria

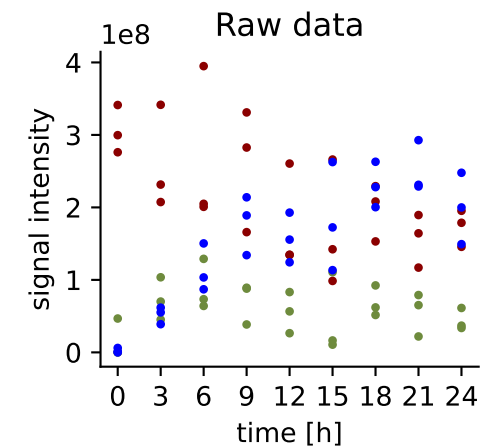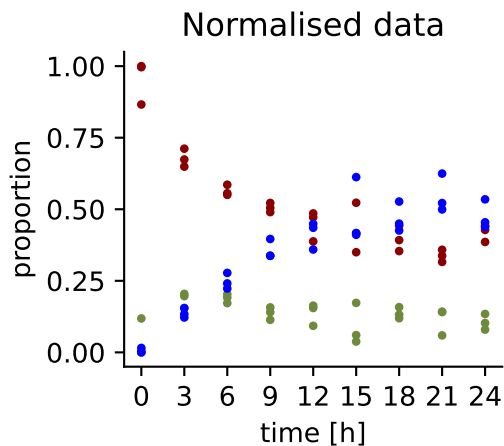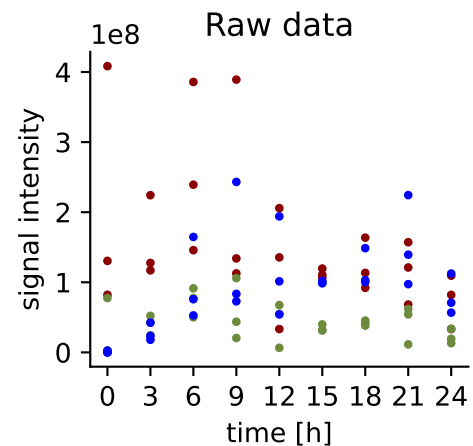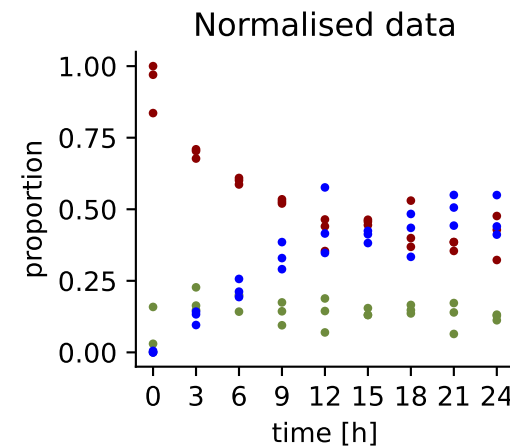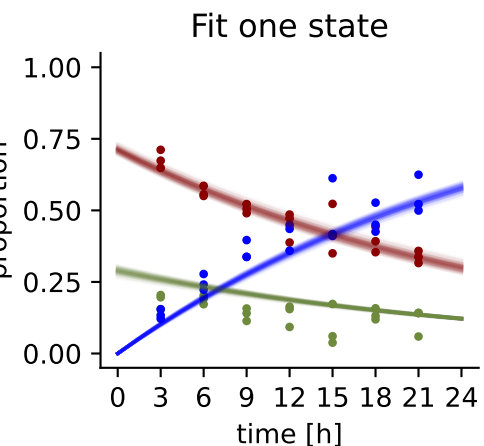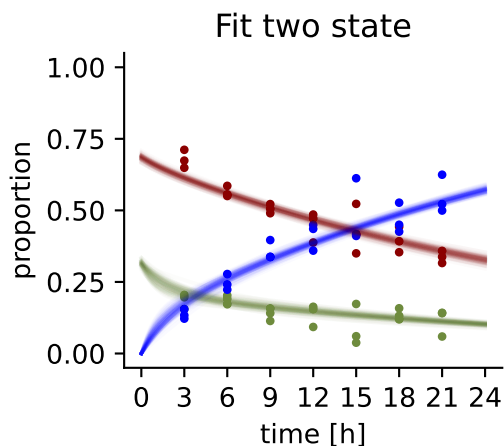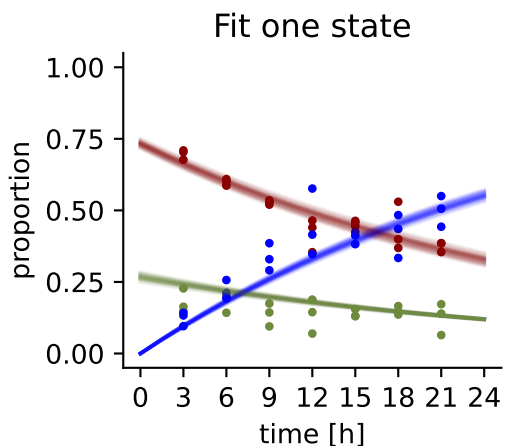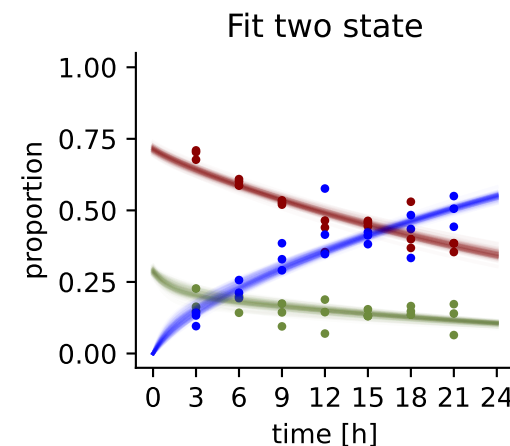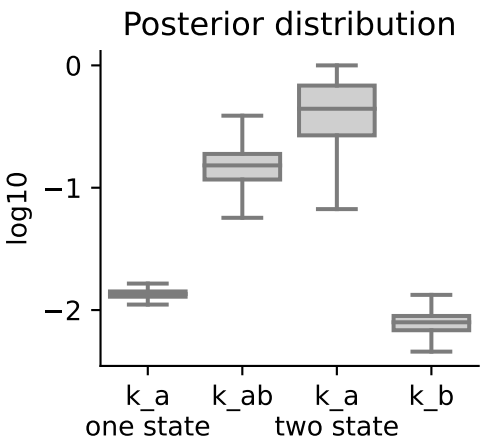

|                          |          |
|--------------------------|----------|
| p value                  | 1.59E-07 |
| log likelihood one state | 87.264   |
| log likelihood two state | 102.918  |
| rmse one state           | 0.388    |
| rmse two state           | 0.326    |
| k_a one state            | 0.014    |
| k_ab                     | 0.152    |
| k_a two state            | 0.442    |
| k_b                      | 0.008    |
| sigma one state          | 0.062    |
| sigma two state          | 0.049    |

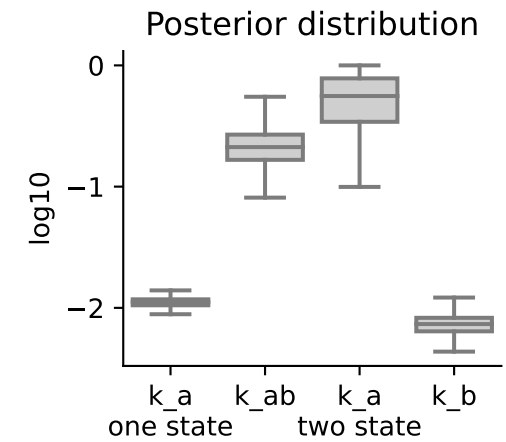

|                          |          |
|--------------------------|----------|
| p value                  | 1.03E-04 |
| log likelihood one state | 88.008   |
| log likelihood two state | 97.19    |
| rmse one state           | 0.361    |
| rmse two state           | 0.31     |
| k_a one state            | 0.011    |
| k_ab                     | 0.212    |
| k_a two state            | 0.559    |
| k_b                      | 0.007    |
| sigma one state          | 0.061    |
| sigma two state          | 0.054    |

uL22m  
MRPL22  
Q9NWU5  
39S ribosomal protein L22, mitochondrial

Cell lysate

Mitochondria

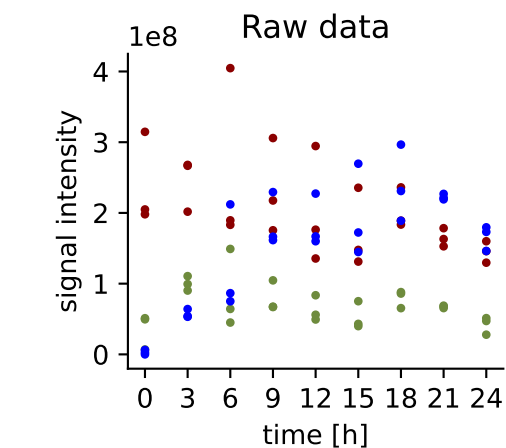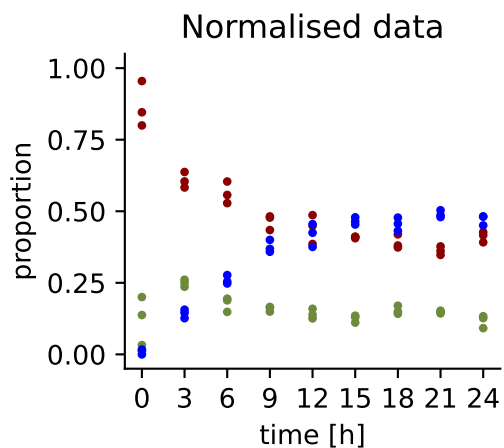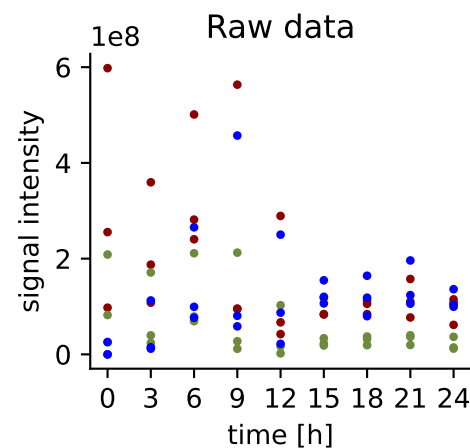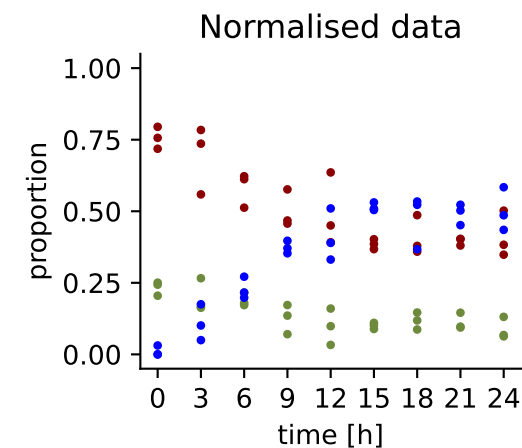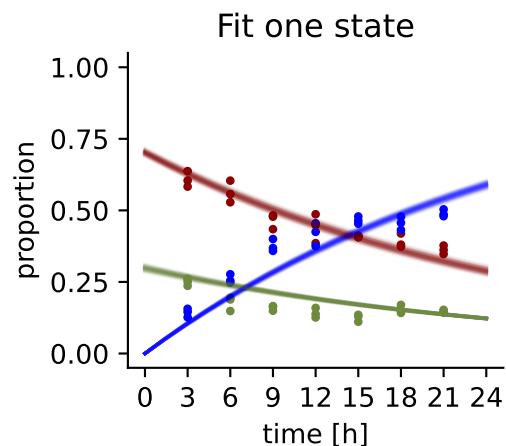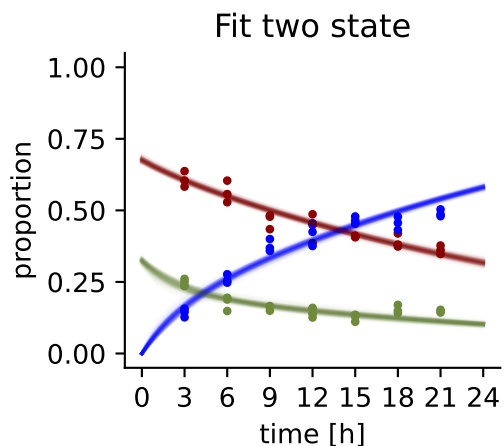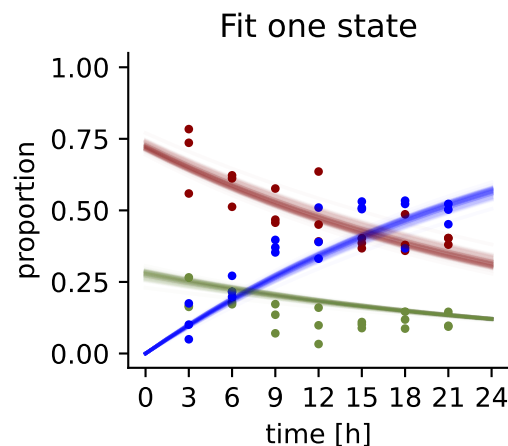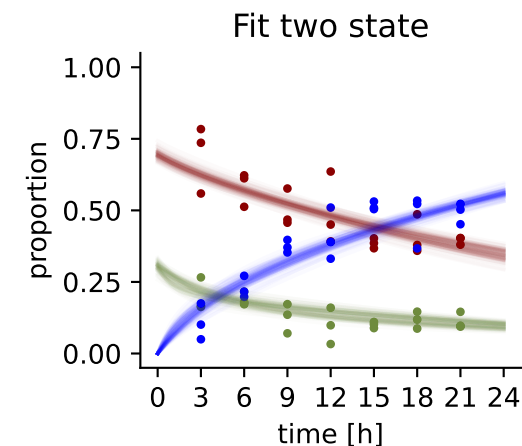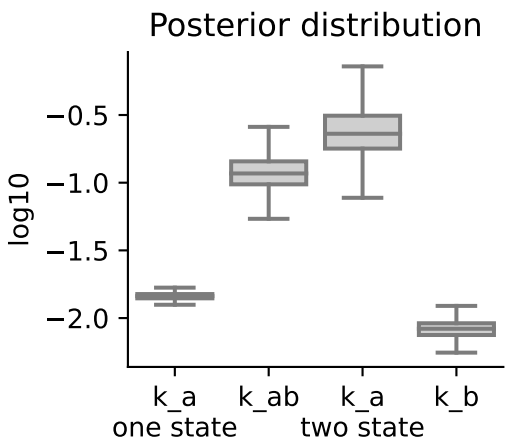

|                          |          |
|--------------------------|----------|
| p value                  | 2.76E-12 |
| log likelihood one state | 103.559  |
| log likelihood two state | 130.176  |
| rmse one state           | 0.364    |
| rmse two state           | 0.305    |
| k_a one state            | 0.015    |
| k_ab                     | 0.117    |
| k_a two state            | 0.23     |
| k_b                      | 0.008    |
| sigma one state          | 0.048    |
| sigma two state          | 0.032    |

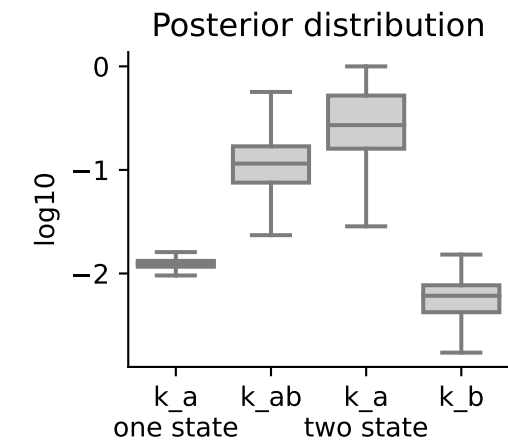

|                          |          |
|--------------------------|----------|
| p value                  | 5.27E-06 |
| log likelihood one state | 74.788   |
| log likelihood two state | 86.94    |
| rmse one state           | 0.389    |
| rmse two state           | 0.341    |
| k_a one state            | 0.012    |
| k_ab                     | 0.115    |
| k_a two state            | 0.271    |
| k_b                      | 0.006    |
| sigma one state          | 0.075    |
| sigma two state          | 0.064    |



uL23m  
MRPL23  
Q16540  
39S ribosomal protein L23, mitochondrial

Cell lysate

Mitochondria

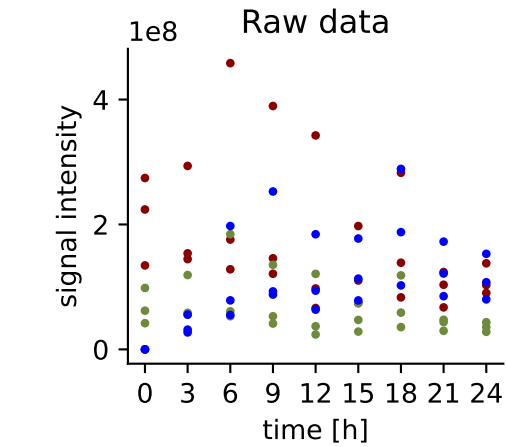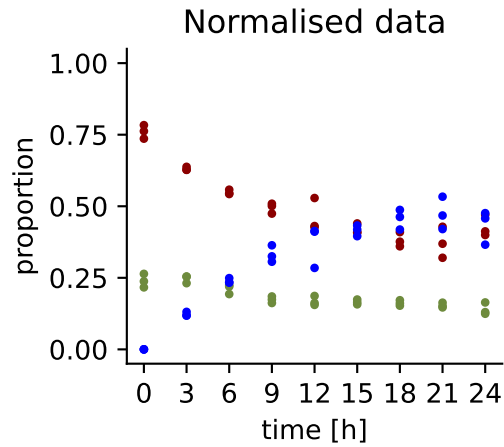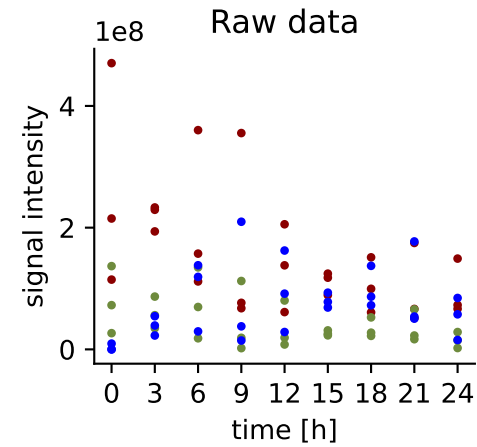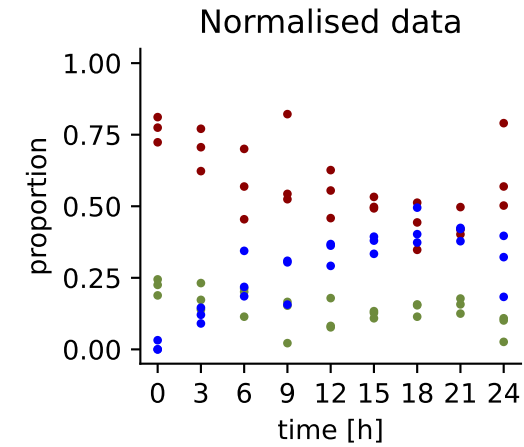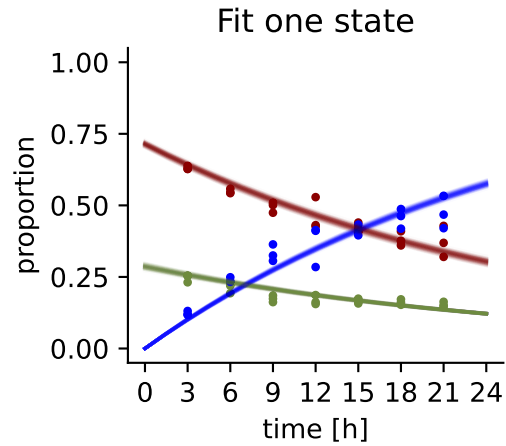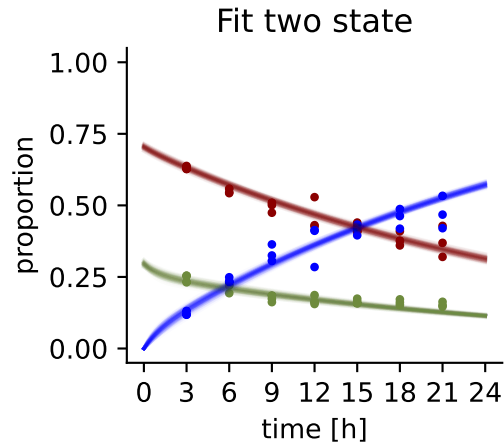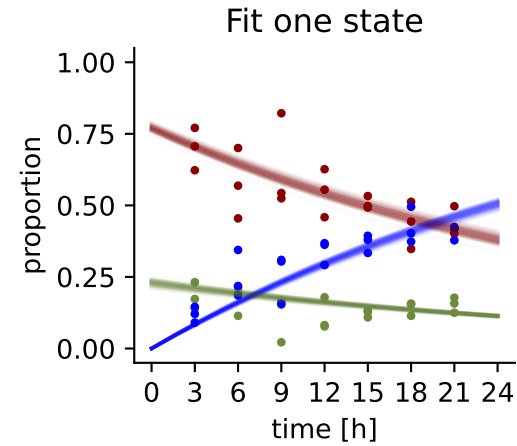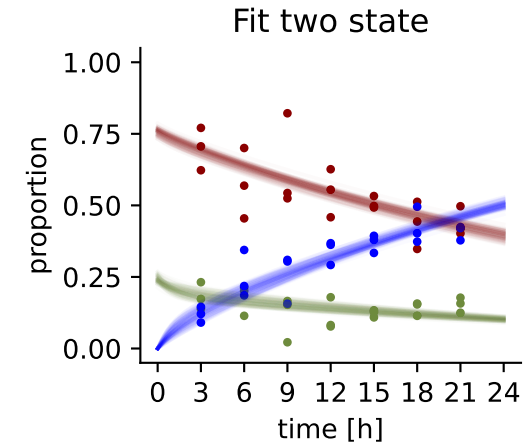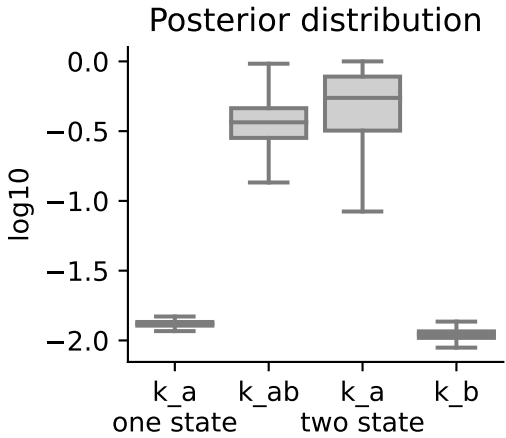

|                          |          |
|--------------------------|----------|
| p value                  | 3.37E-04 |
| log likelihood one state | 119.244  |
| log likelihood two state | 127.24   |
| rmse one state           | 0.342    |
| rmse two state           | 0.31     |
| k_a one state            | 0.013    |
| k_ab                     | 0.366    |
| k_a two state            | 0.548    |
| k_b                      | 0.011    |
| sigma one state          | 0.037    |
| sigma two state          | 0.033    |

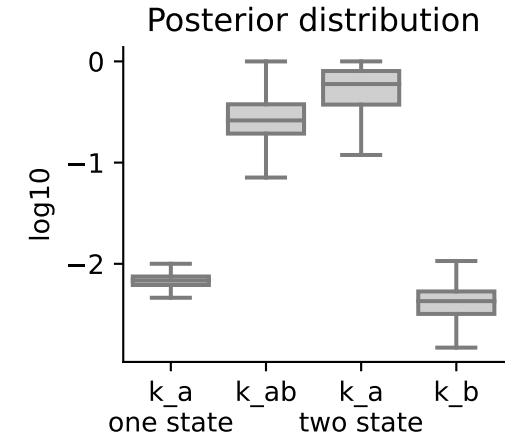

|                          |          |
|--------------------------|----------|
| p value                  | 7.15E-03 |
| log likelihood one state | 78.772   |
| log likelihood two state | 83.712   |
| rmse one state           | 0.33     |
| rmse two state           | 0.284    |
| k_a one state            | 0.007    |
| k_ab                     | 0.261    |
| k_a two state            | 0.597    |
| k_b                      | 0.004    |
| sigma one state          | 0.071    |
| sigma two state          | 0.066    |

uL24m  
MRPL24  
Q96A35  
39S ribosomal protein L24, mitochondrial

Cell lysate

Mitochondria

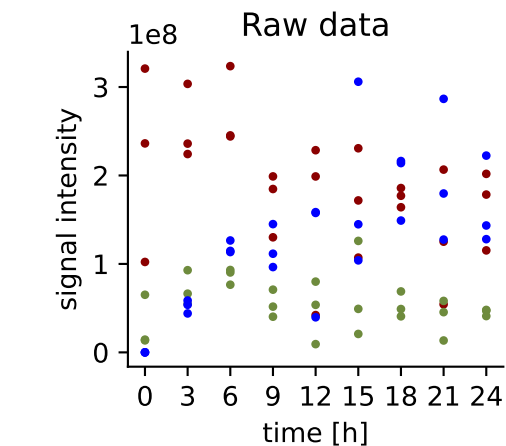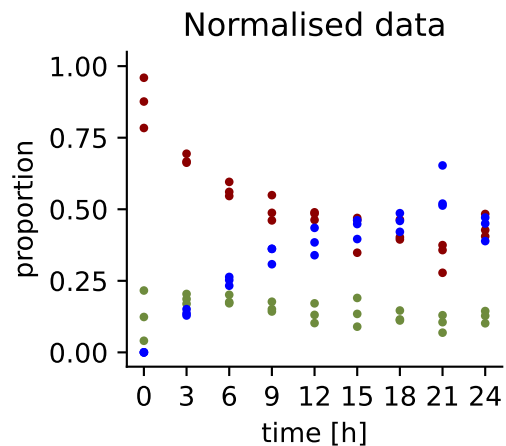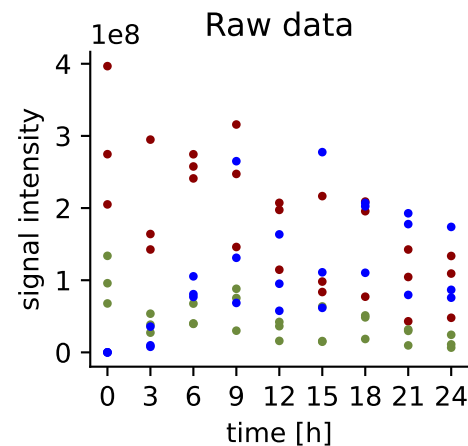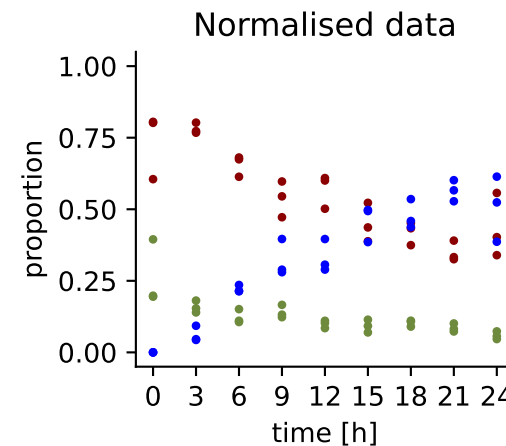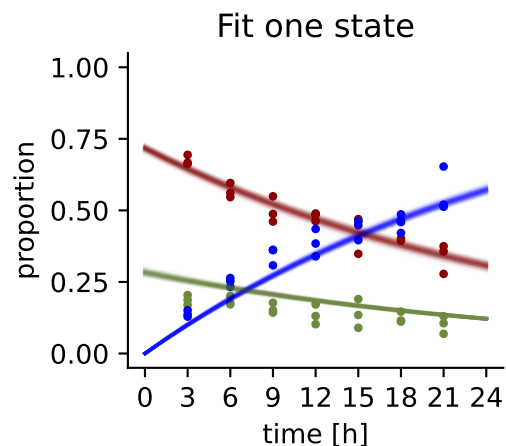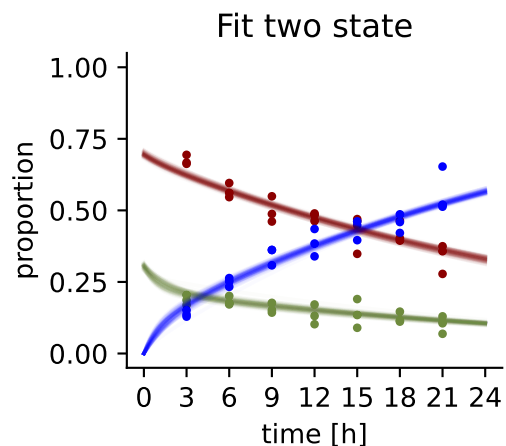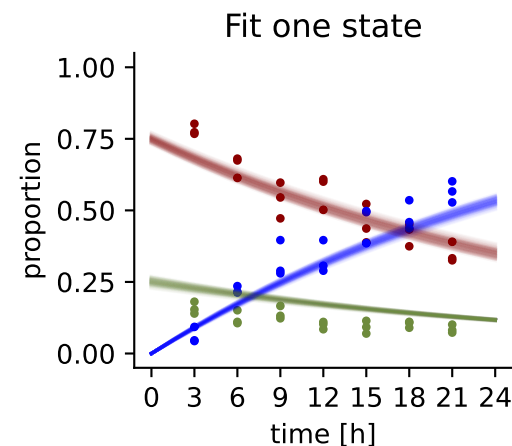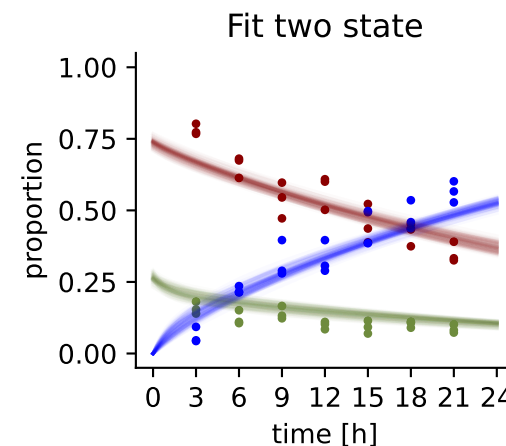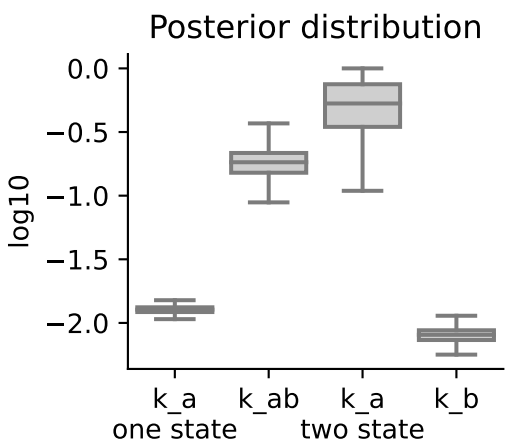

|                          |          |
|--------------------------|----------|
| p value                  | 1.03E-08 |
| log likelihood one state | 99.902   |
| log likelihood two state | 118.291  |
| rmse one state           | 0.373    |
| rmse two state           | 0.312    |
| k_a one state            | 0.013    |
| k_ab                     | 0.183    |
| k_a two state            | 0.53     |
| k_b                      | 0.008    |
| sigma one state          | 0.051    |
| sigma two state          | 0.038    |

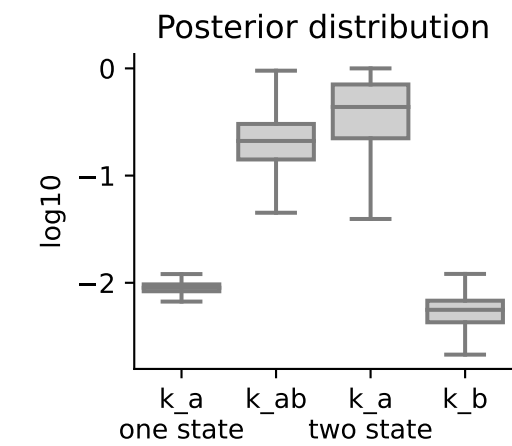

|                          |          |
|--------------------------|----------|
| p value                  | 5.94E-04 |
| log likelihood one state | 81.78    |
| log likelihood two state | 89.208   |
| rmse one state           | 0.385    |
| rmse two state           | 0.355    |
| k_a one state            | 0.009    |
| k_ab                     | 0.21     |
| k_a two state            | 0.437    |
| k_b                      | 0.006    |
| sigma one state          | 0.067    |
| sigma two state          | 0.062    |

bL27m  
MRPL27  
Q9P0M9  
39S ribosomal protein L27, mitochondrial

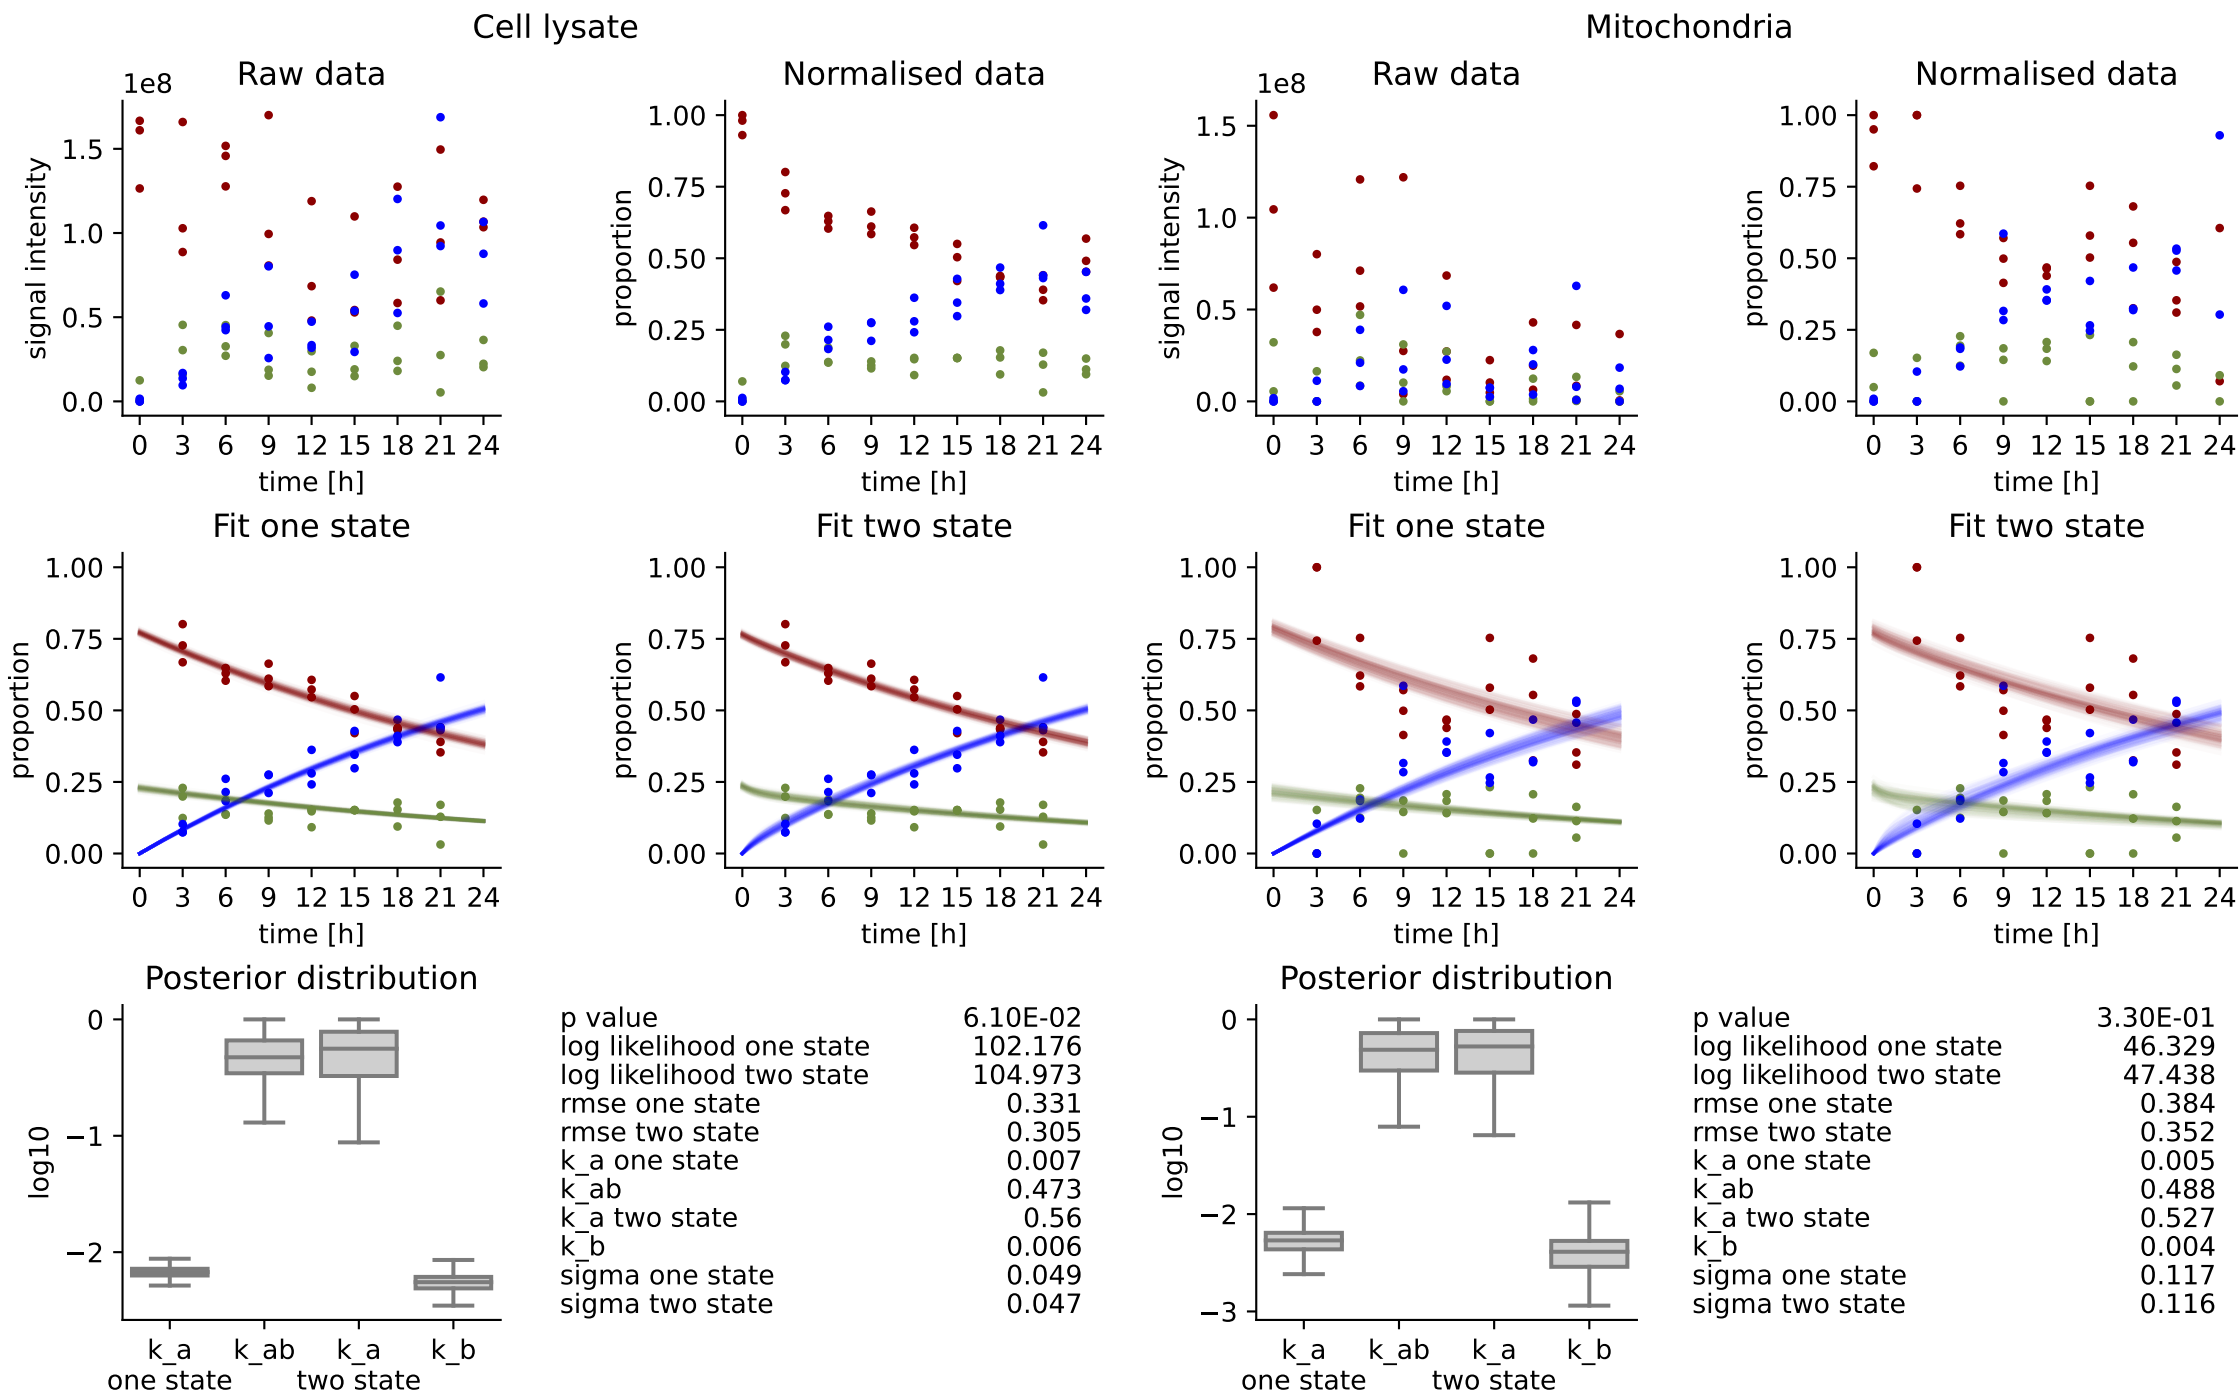

bL28m  
MRPL28  
Q13084  
39S ribosomal protein L28, mitochondrial

Cell lysate

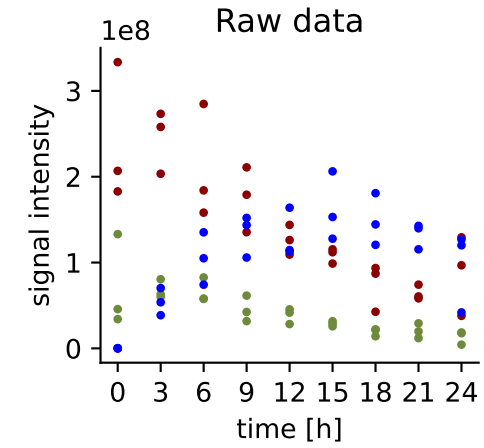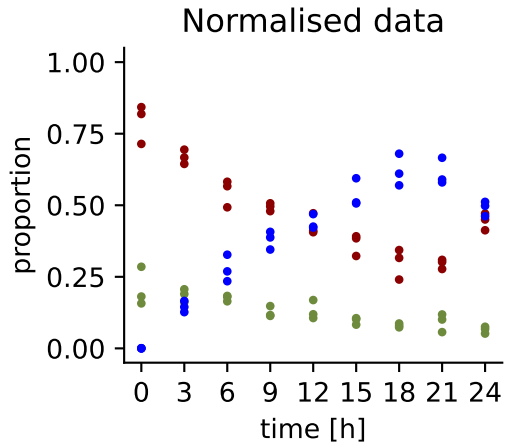

Mitochondria

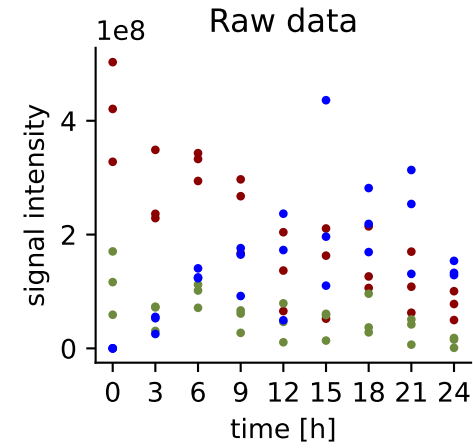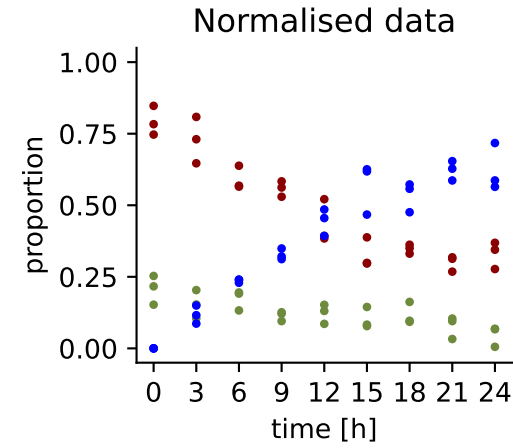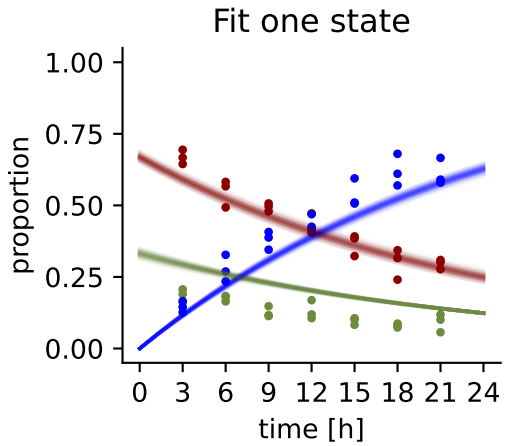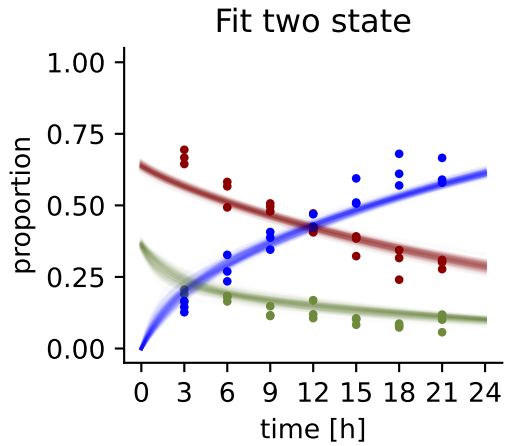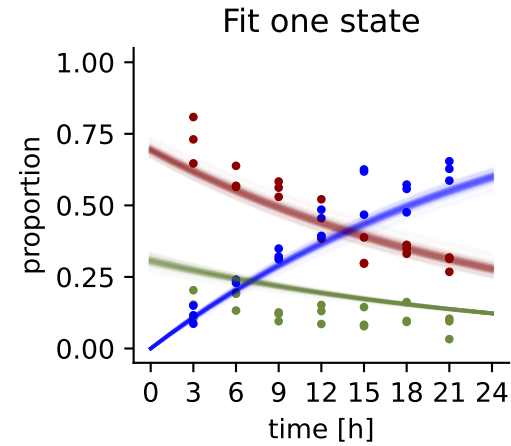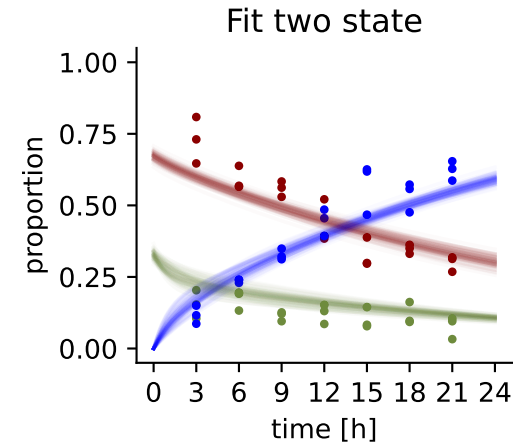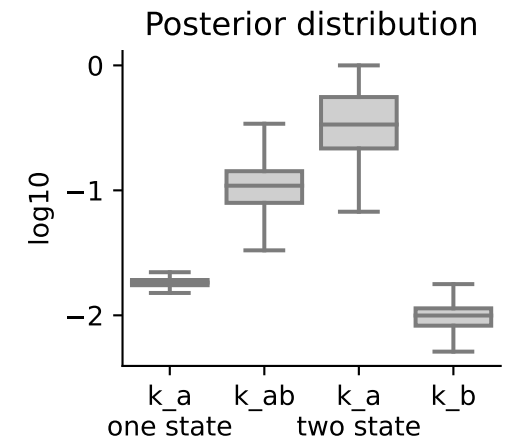

|                          |          |
|--------------------------|----------|
| p value                  | 2.86E-09 |
| log likelihood one state | 78.374   |
| log likelihood two state | 98.047   |
| rmse one state           | 0.442    |
| rmse two state           | 0.371    |
| k_a one state            | 0.018    |
| k_ab                     | 0.109    |
| k_a two state            | 0.336    |
| k_b                      | 0.01     |
| sigma one state          | 0.071    |
| sigma two state          | 0.053    |

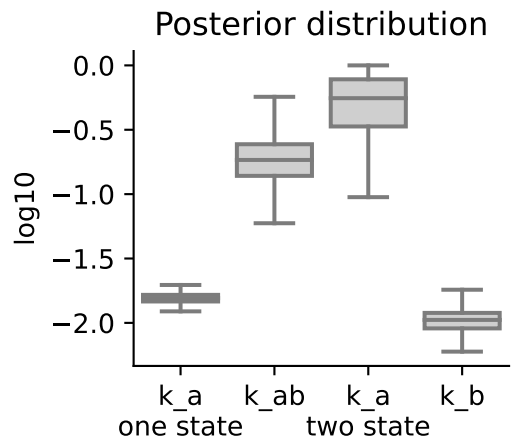

|                          |          |
|--------------------------|----------|
| p value                  | 2.54E-04 |
| log likelihood one state | 70.718   |
| log likelihood two state | 78.996   |
| rmse one state           | 0.438    |
| rmse two state           | 0.38     |
| k_a one state            | 0.016    |
| k_ab                     | 0.184    |
| k_a two state            | 0.556    |
| k_b                      | 0.011    |
| sigma one state          | 0.08     |
| sigma two state          | 0.072    |

uL29m  
MRPL47  
Q9HD33  
39S ribosomal protein L47, mitochondrial

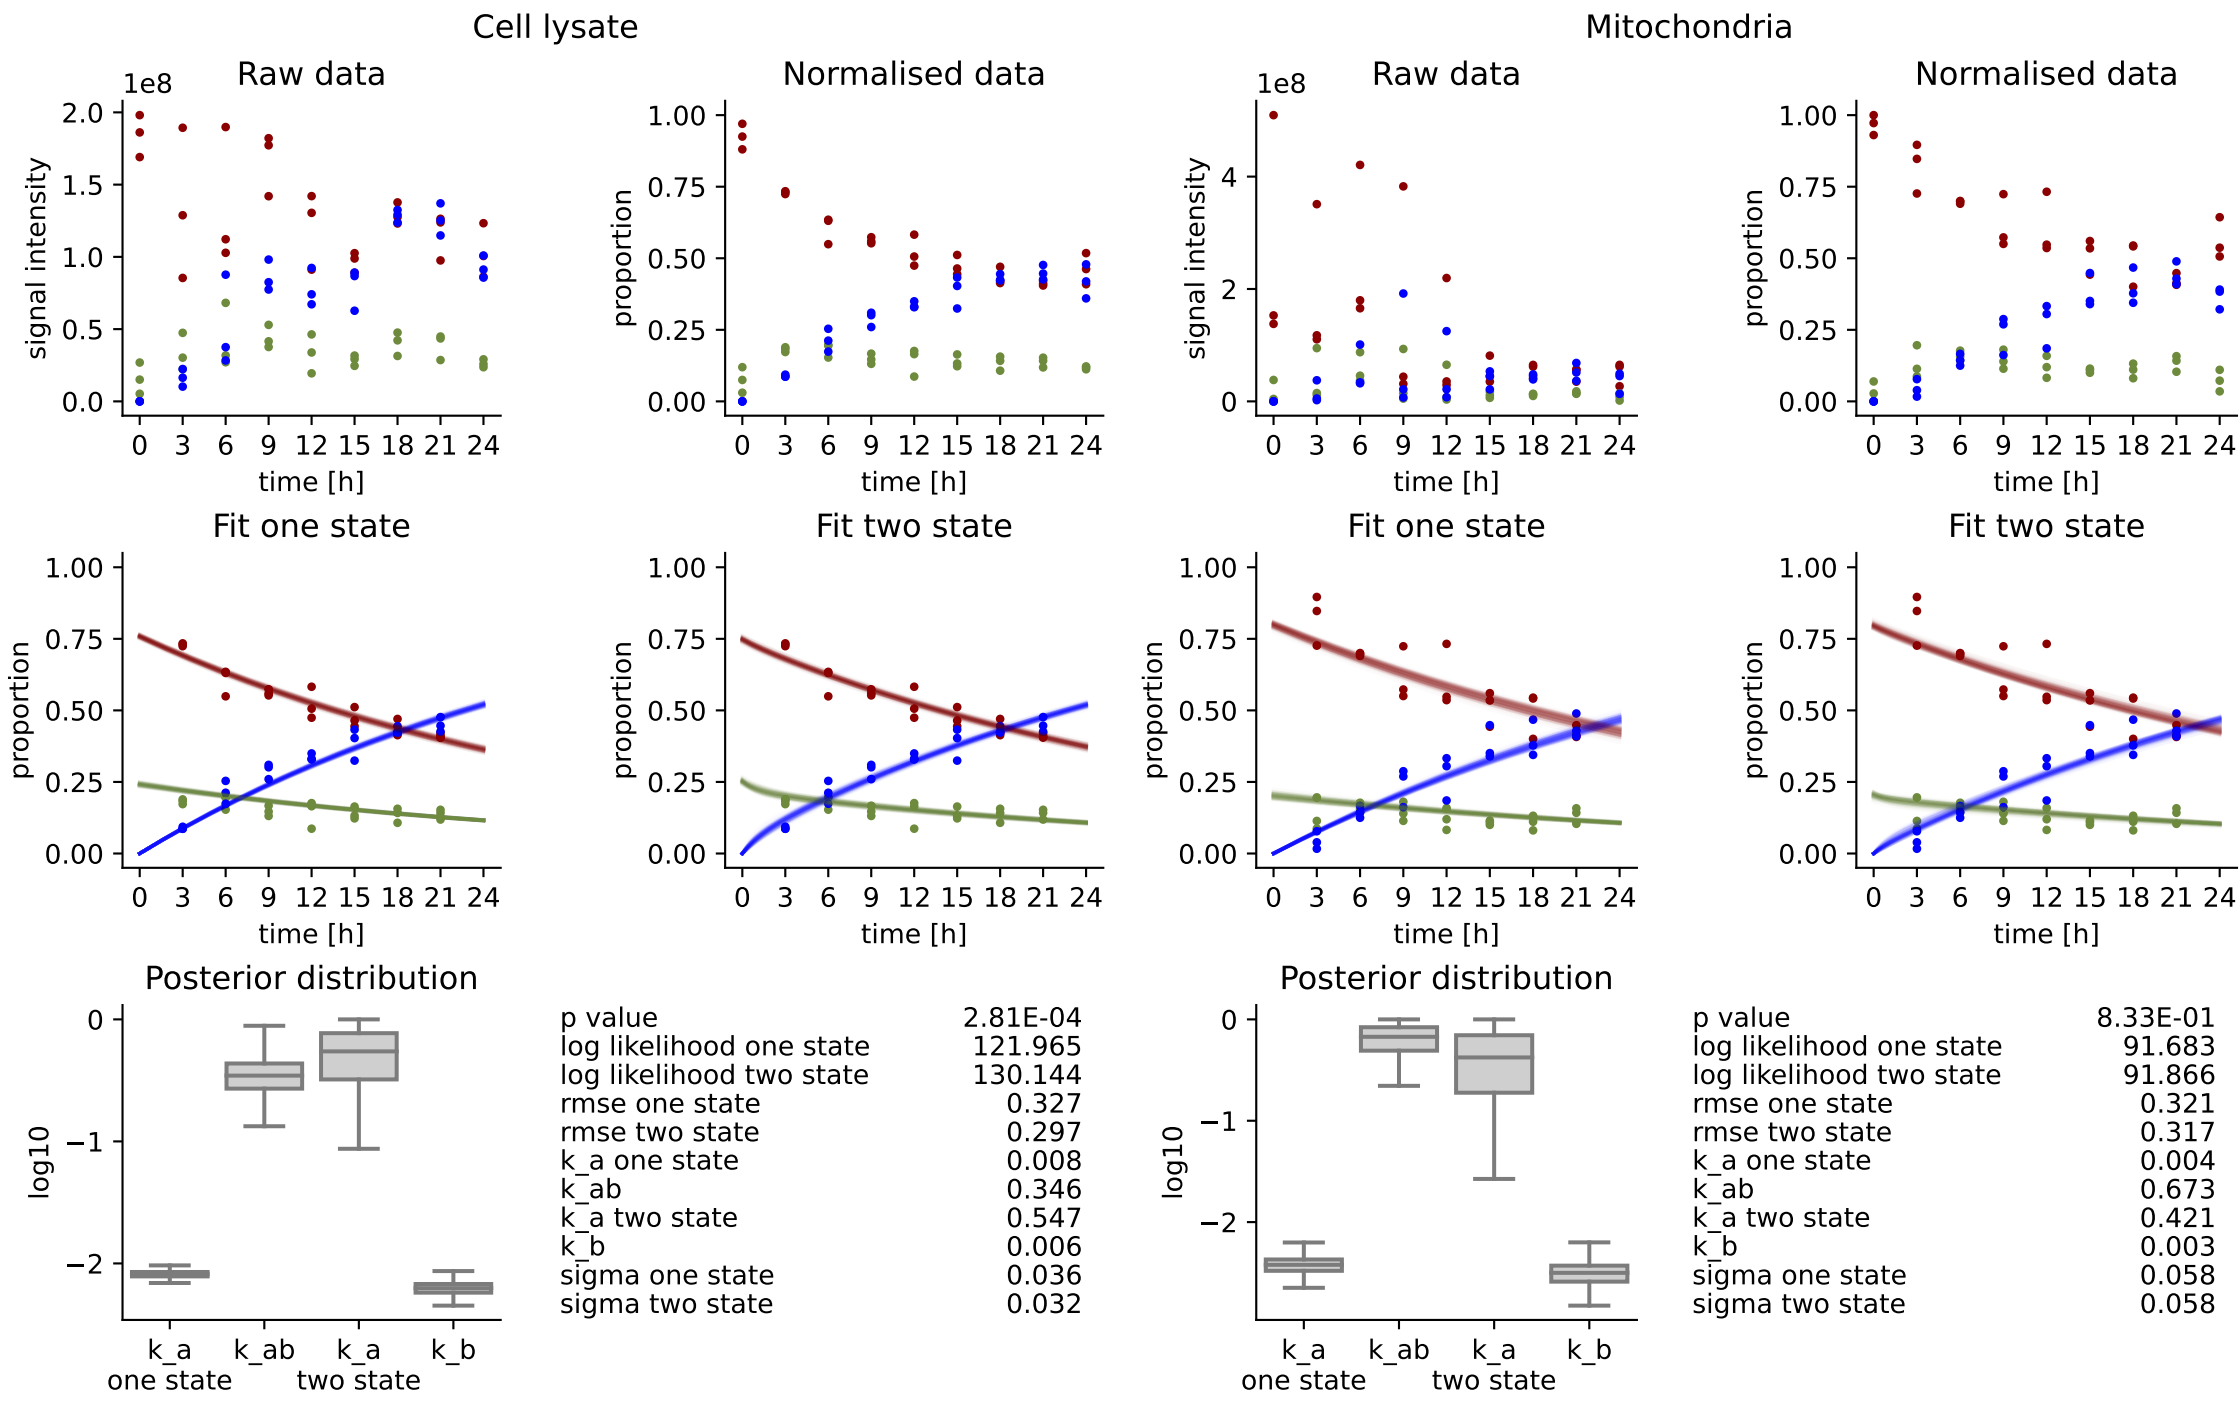

uL30m  
MRPL30  
Q8TCC3  
39S ribosomal protein L30, mitochondrial

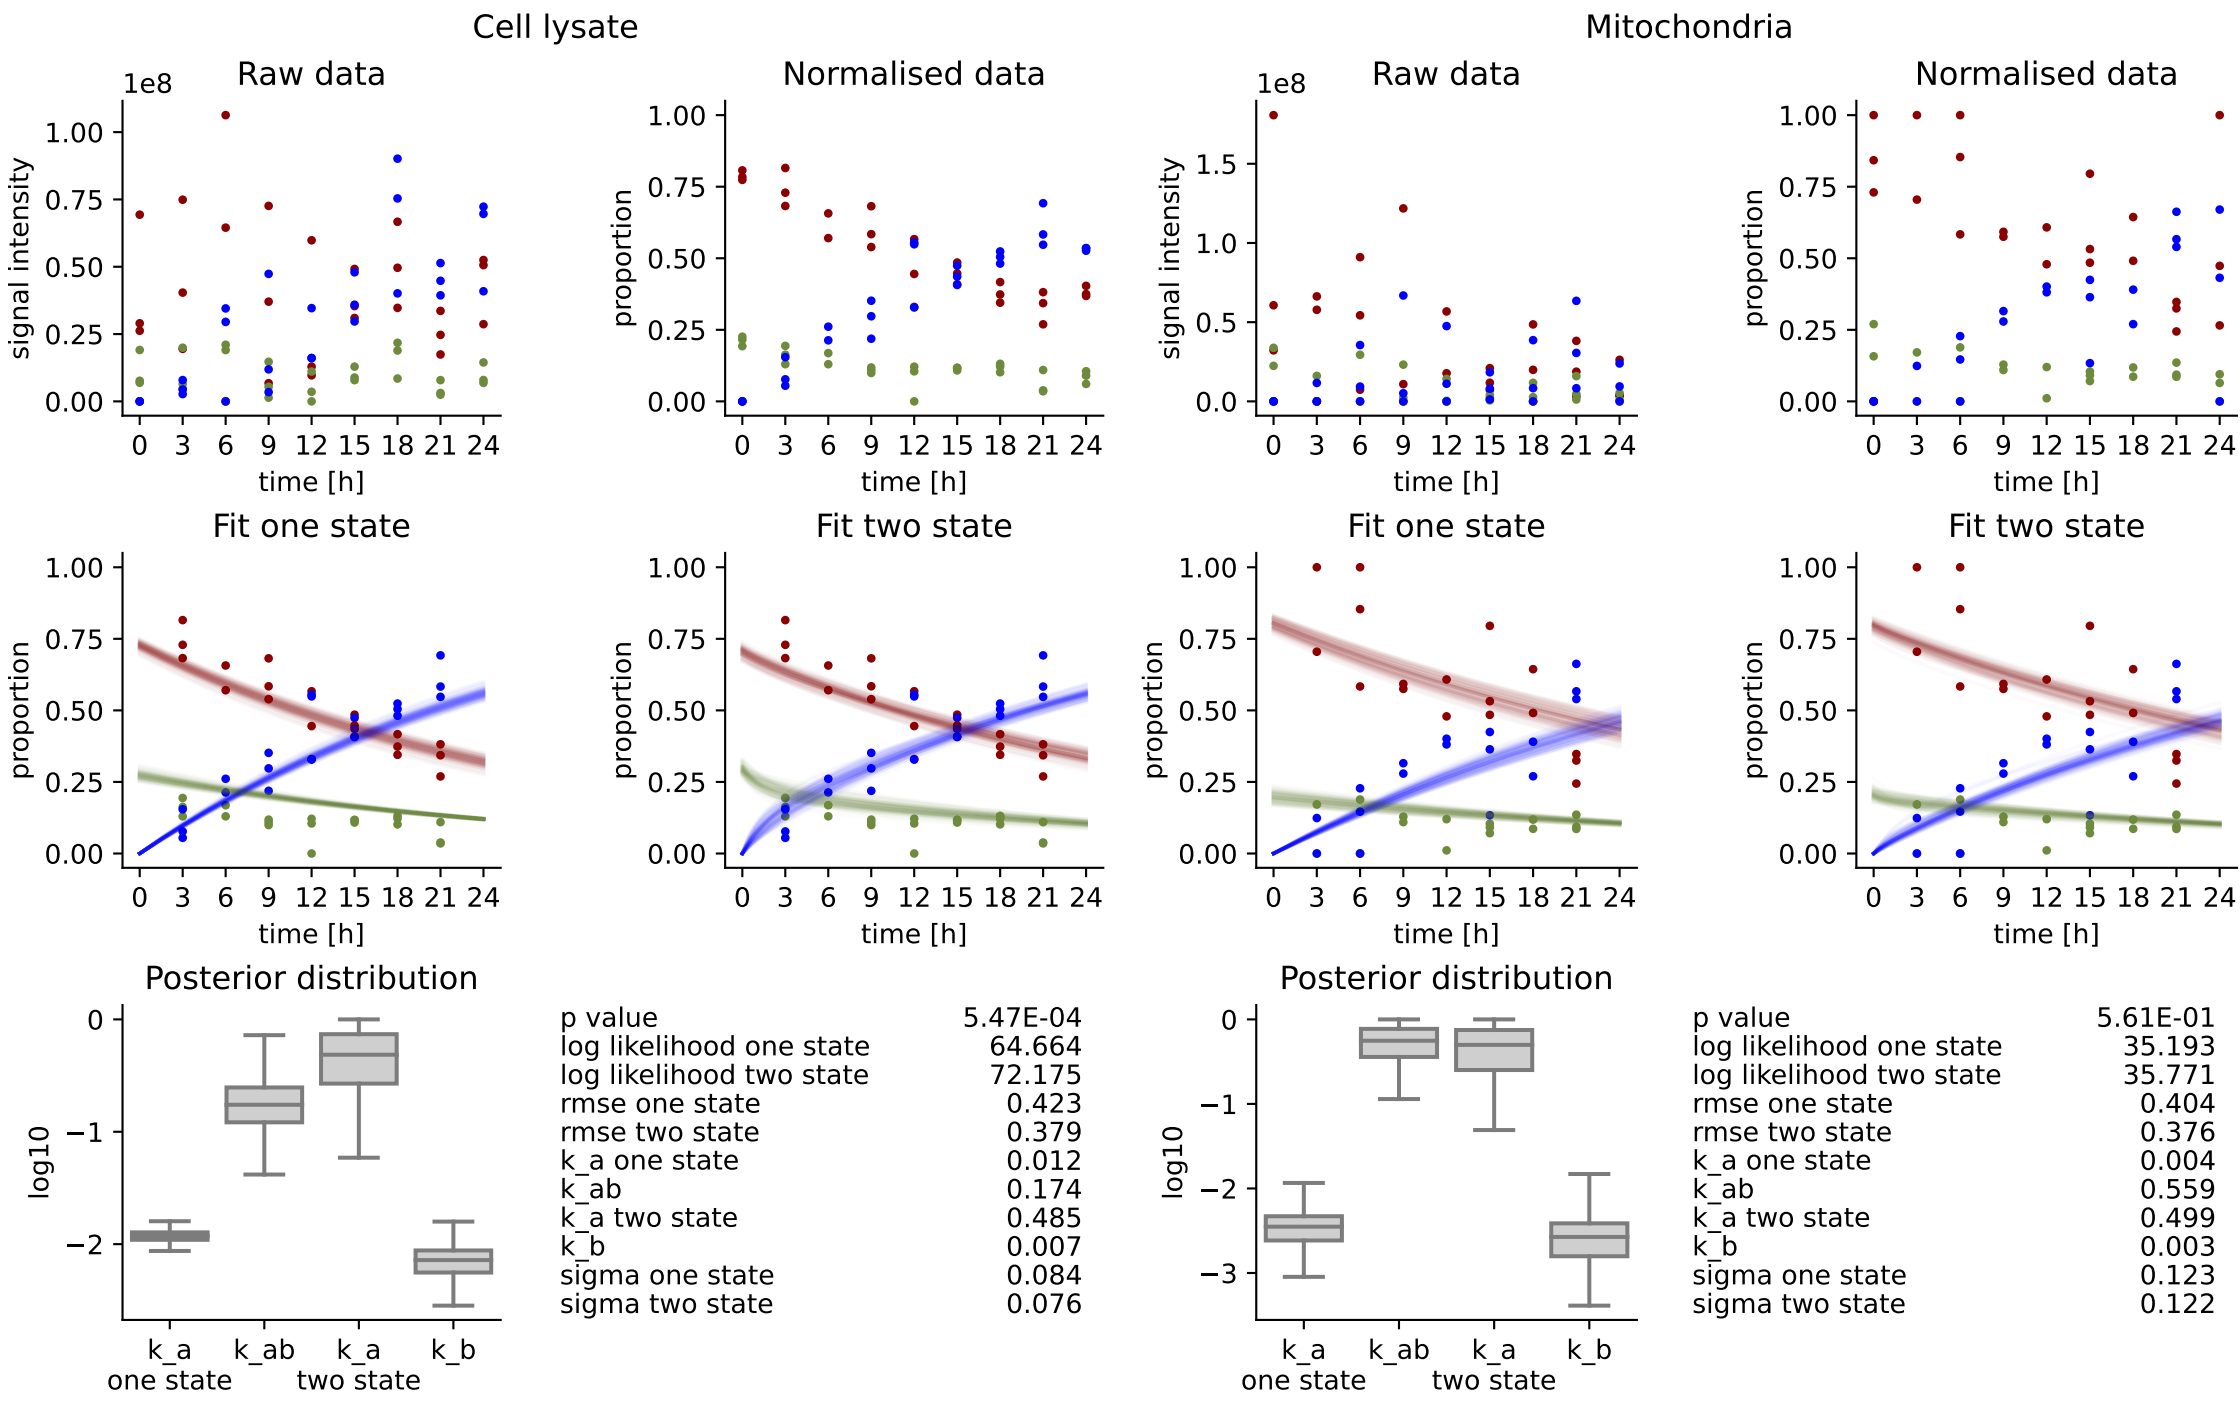

bL31m  
MRPL55  
Q7Z7F7  
39S ribosomal protein L55, mitochondrial

Cell lysate

Mitochondria

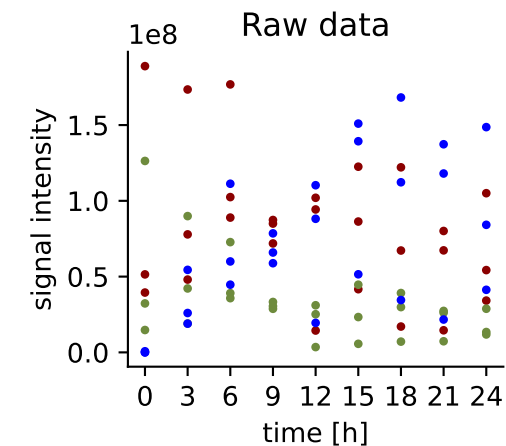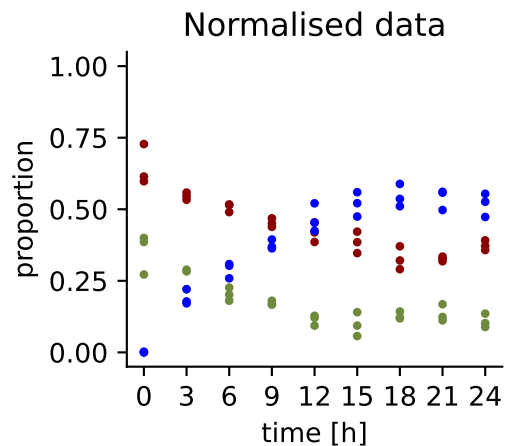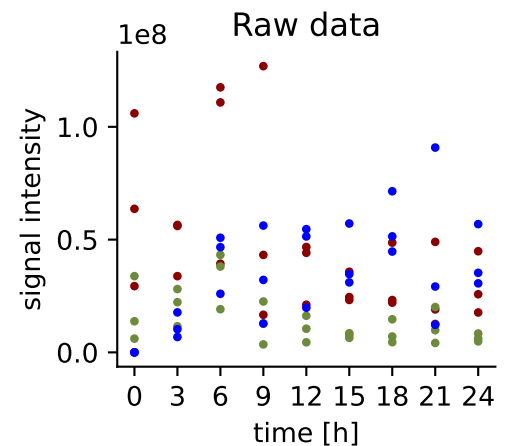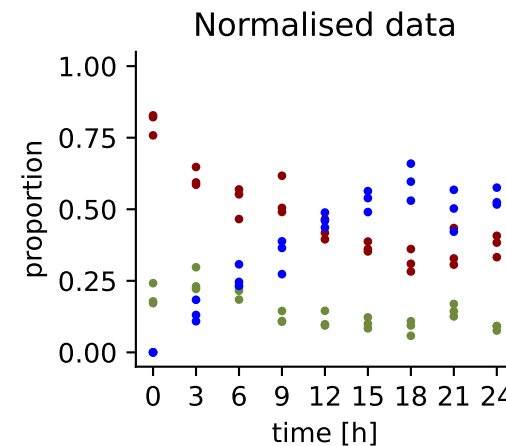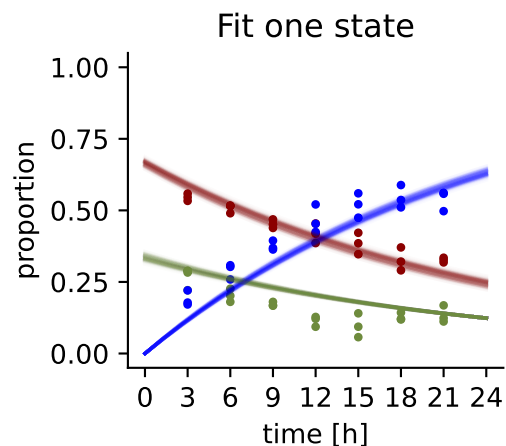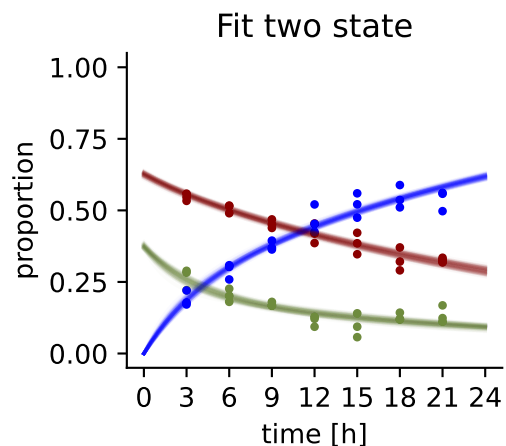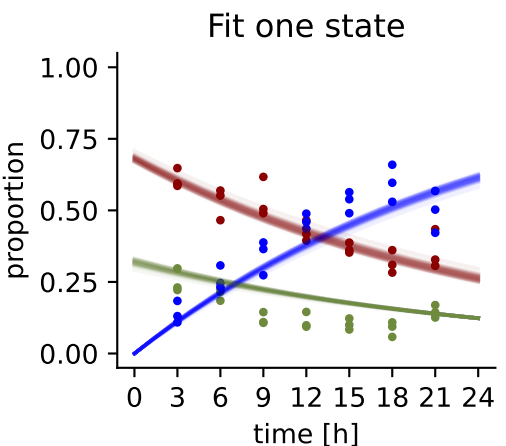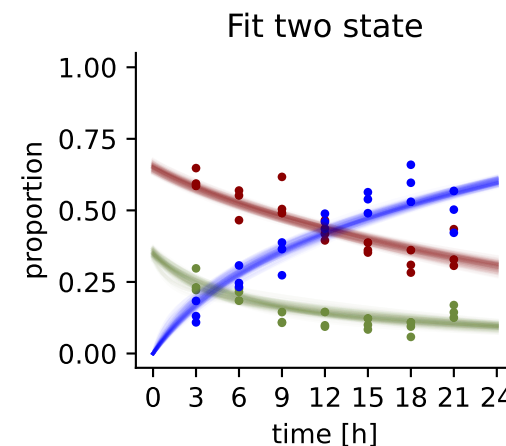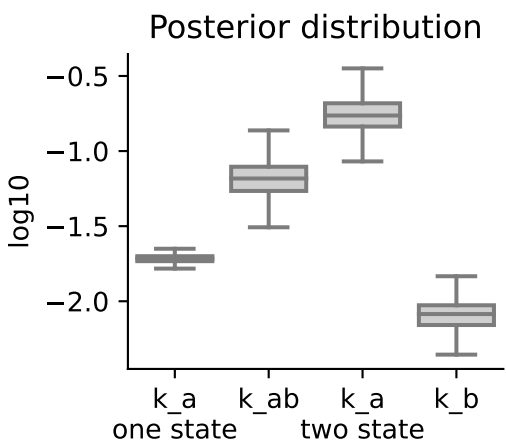

|                          |          |
|--------------------------|----------|
| p value                  | 9.90E-18 |
| log likelihood one state | 91.998   |
| log likelihood two state | 131.152  |
| rmse one state           | 0.403    |
| rmse two state           | 0.331    |
| k_a one state            | 0.019    |
| k_ab                     | 0.066    |
| k_a two state            | 0.172    |
| k_b                      | 0.008    |
| sigma one state          | 0.057    |
| sigma two state          | 0.031    |

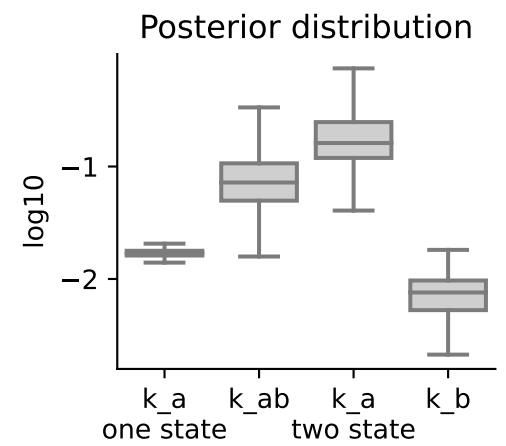

|                          |          |
|--------------------------|----------|
| p value                  | 3.45E-08 |
| log likelihood one state | 80.087   |
| log likelihood two state | 97.269   |
| rmse one state           | 0.411    |
| rmse two state           | 0.355    |
| k_a one state            | 0.017    |
| k_ab                     | 0.072    |
| k_a two state            | 0.162    |
| k_b                      | 0.008    |
| sigma one state          | 0.069    |
| sigma two state          | 0.054    |



bL32m  
MRPL32  
Q9BYC8  
39S ribosomal protein L32, mitochondrial

Cell lysate

Mitochondria

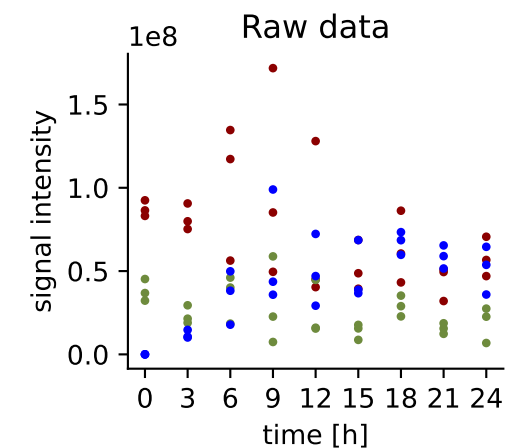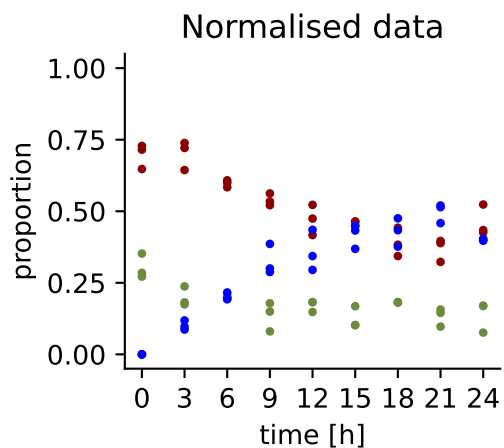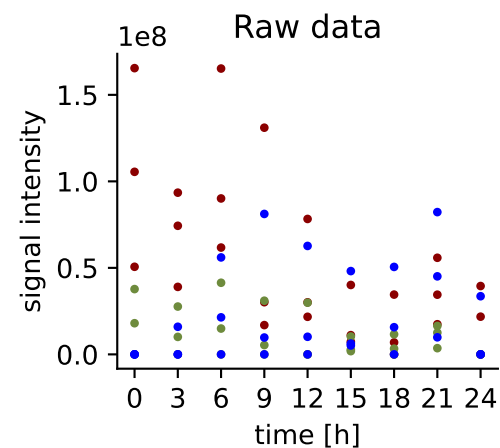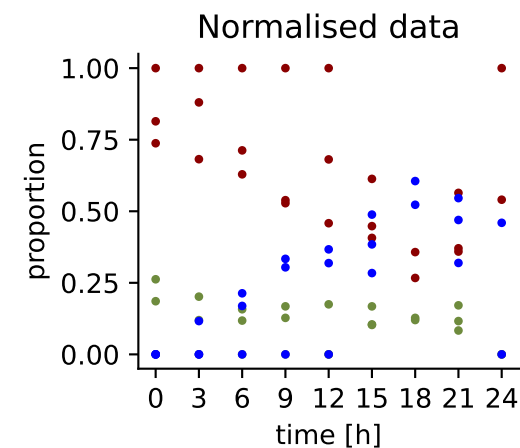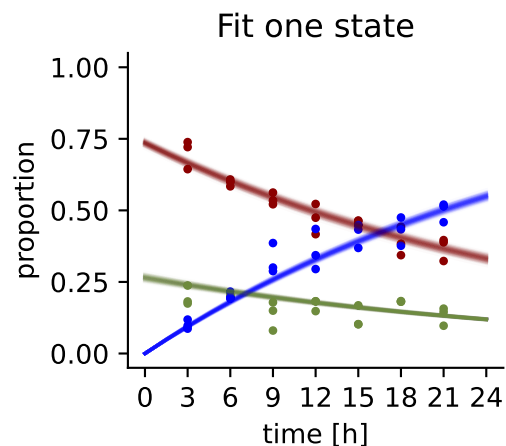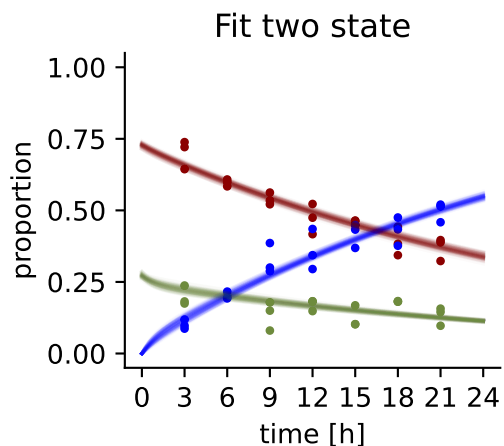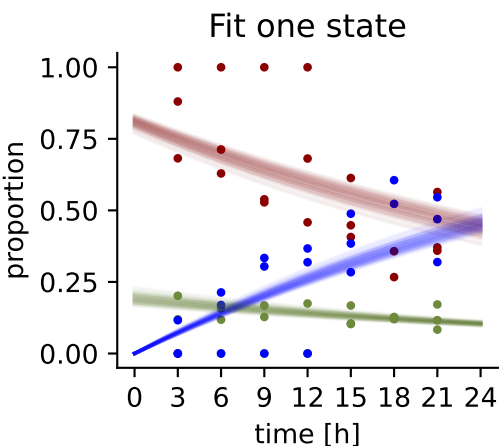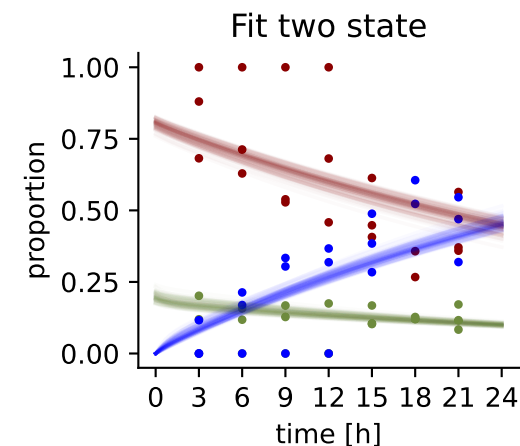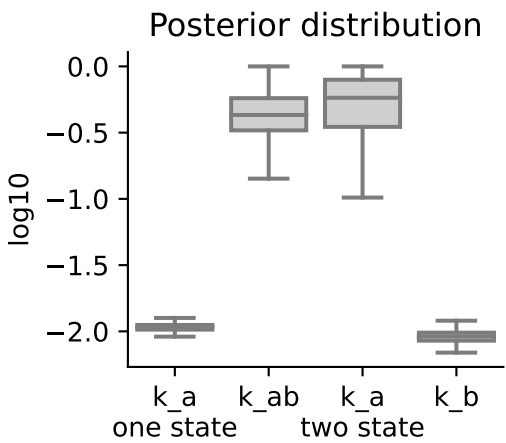

|                          |          |
|--------------------------|----------|
| p value                  | 1.11E-02 |
| log likelihood one state | 109.846  |
| log likelihood two state | 114.343  |
| rmse one state           | 0.347    |
| rmse two state           | 0.317    |
| k_a one state            | 0.011    |
| k_ab                     | 0.43     |
| k_a two state            | 0.579    |
| k_b                      | 0.009    |
| sigma one state          | 0.043    |
| sigma two state          | 0.041    |

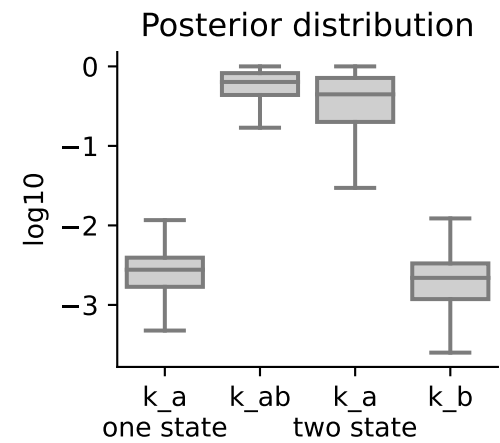

|                          |          |
|--------------------------|----------|
| p value                  | 9.77E-01 |
| log likelihood one state | 33.509   |
| log likelihood two state | 33.532   |
| rmse one state           | 0.4      |
| rmse two state           | 0.395    |
| k_a one state            | 0.003    |
| k_ab                     | 0.637    |
| k_a two state            | 0.445    |
| k_b                      | 0.002    |
| sigma one state          | 0.139    |
| sigma two state          | 0.139    |

bL33m  
MRPL33  
O75394  
39S ribosomal protein L33, mitochondrial

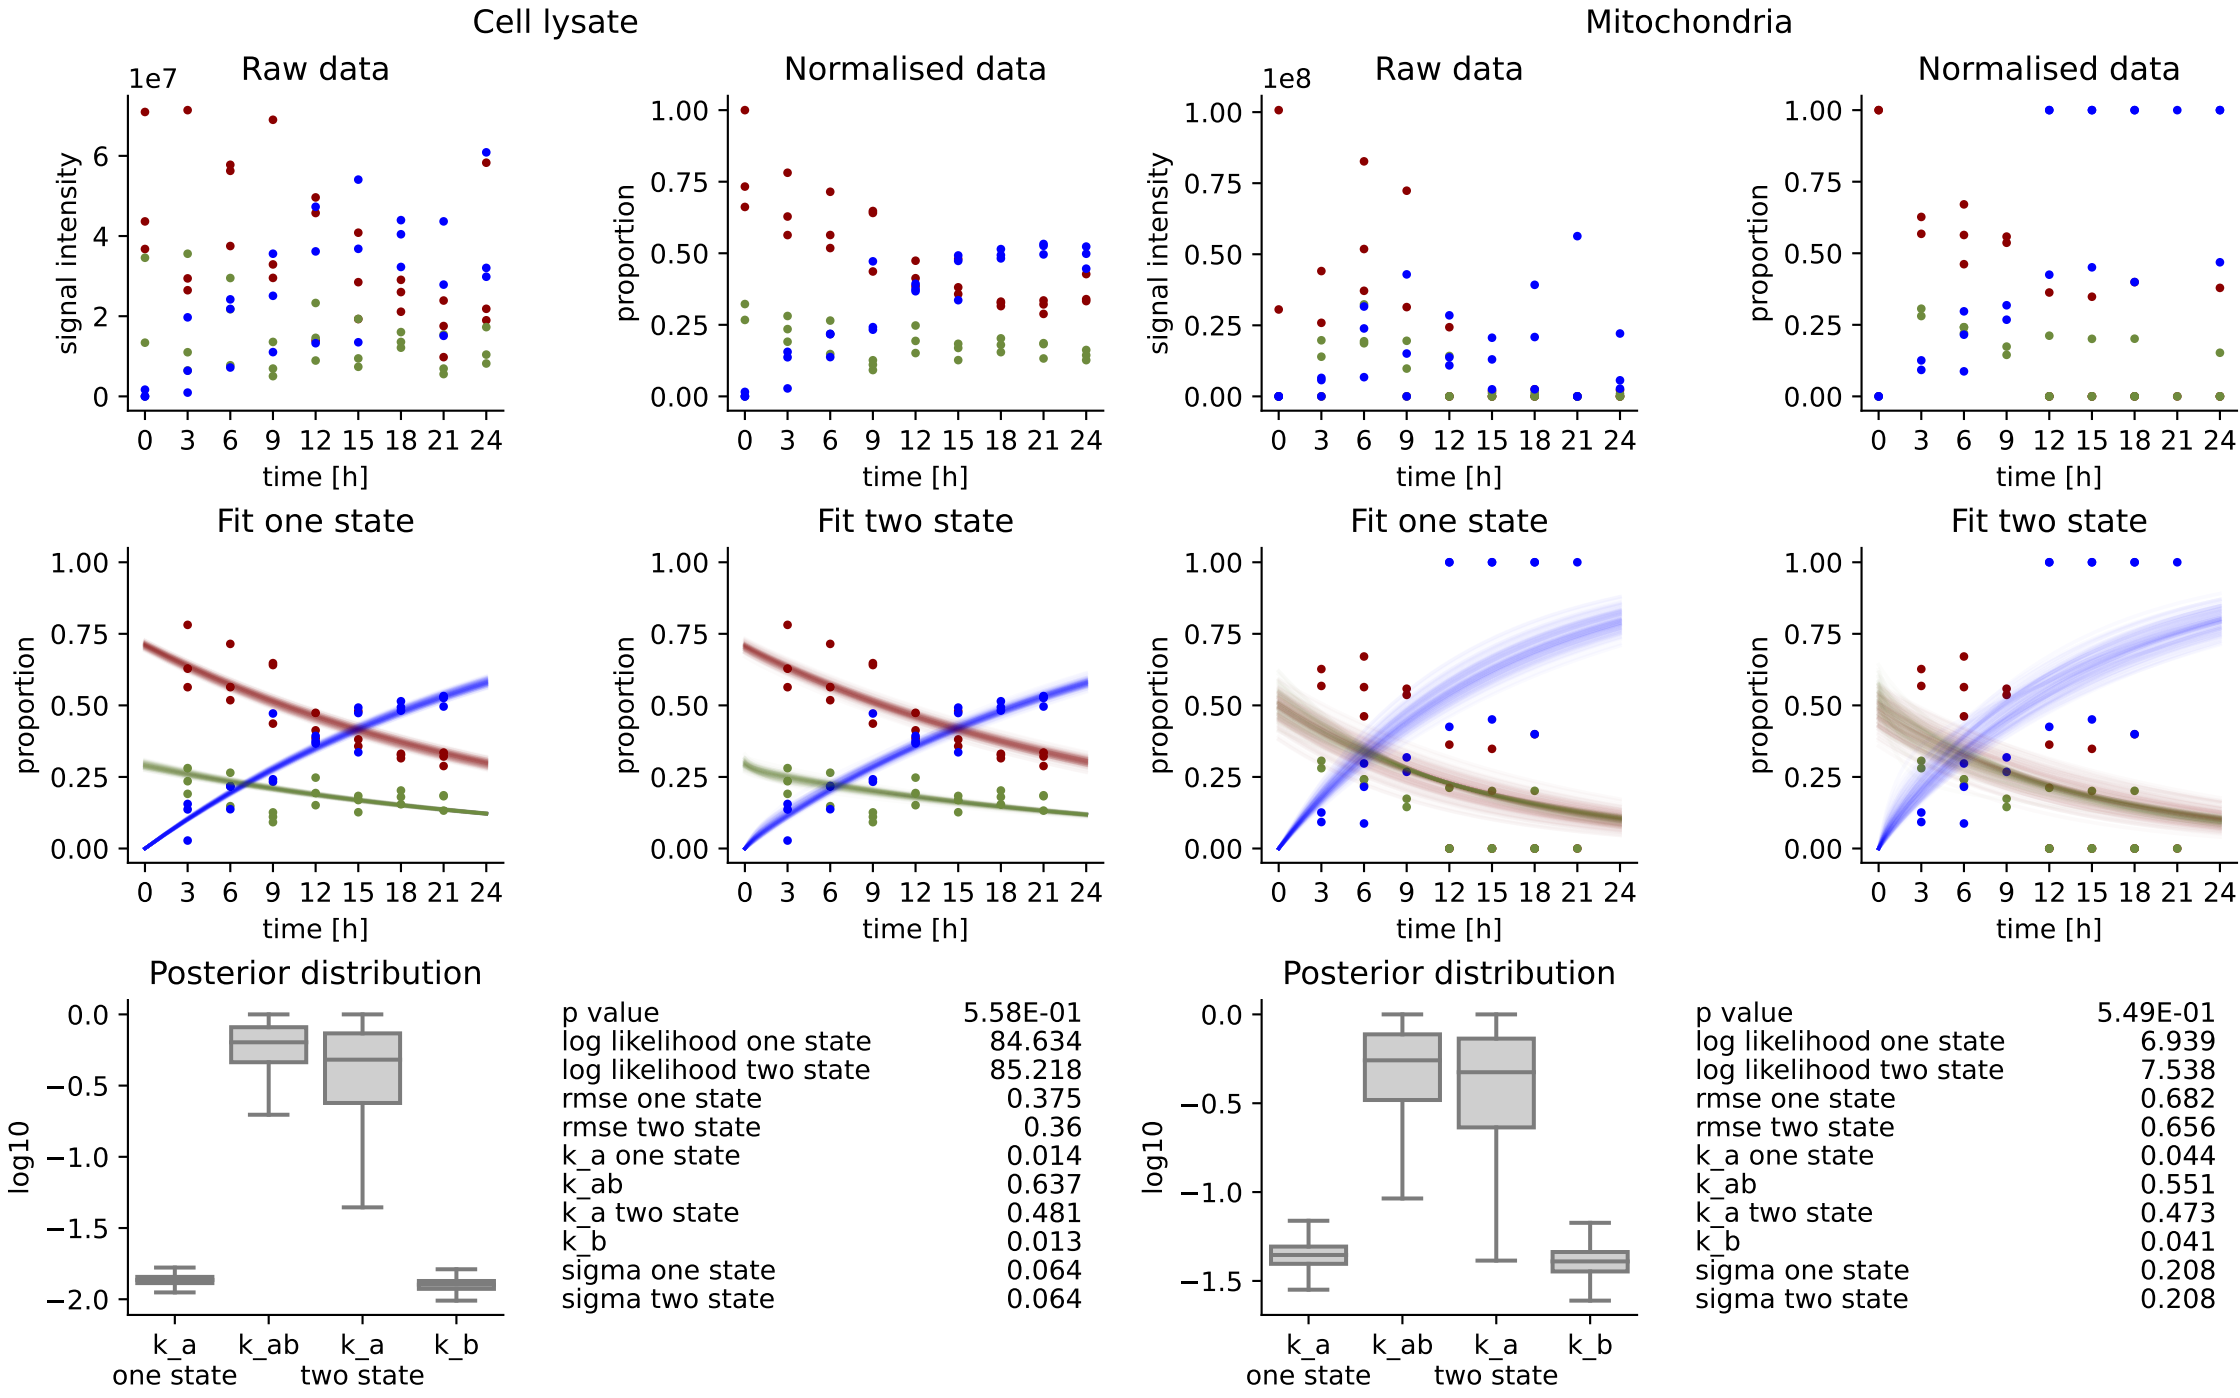

bL34m  
MRPL34  
Q9BQ48  
39S ribosomal protein L34, mitochondrial

Cell lysate

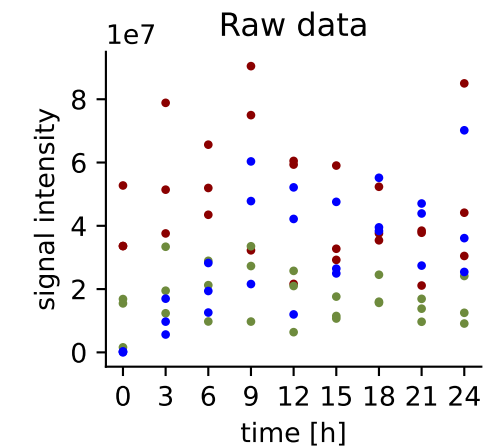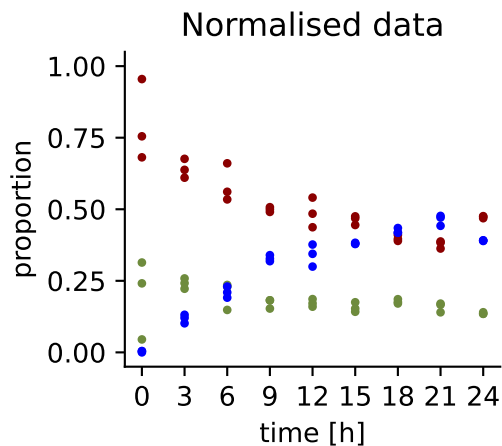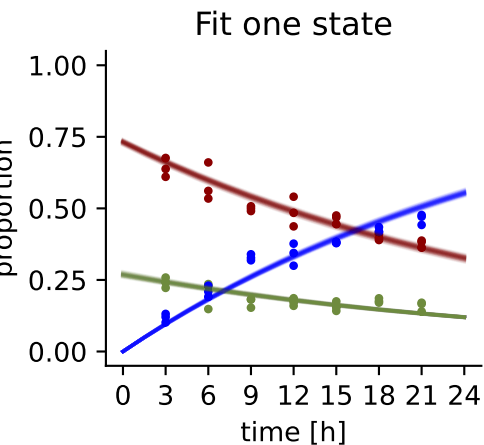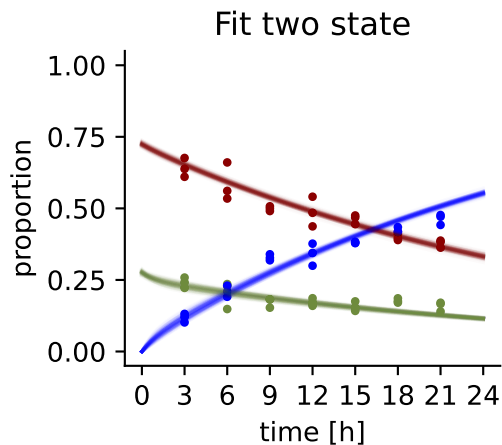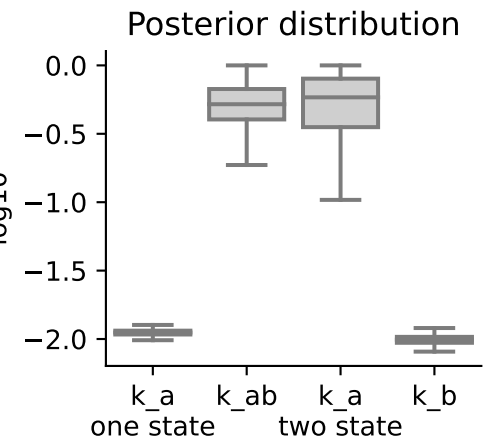

|                          |          |
|--------------------------|----------|
| p value                  | 1.67E-02 |
| log likelihood one state | 123.138  |
| log likelihood two state | 127.23   |
| rmse one state           | 0.325    |
| rmse two state           | 0.302    |
| k_a one state            | 0.011    |
| k_ab                     | 0.52     |
| k_a two state            | 0.584    |
| k_b                      | 0.01     |
| sigma one state          | 0.035    |
| sigma two state          | 0.033    |

Mitochondria

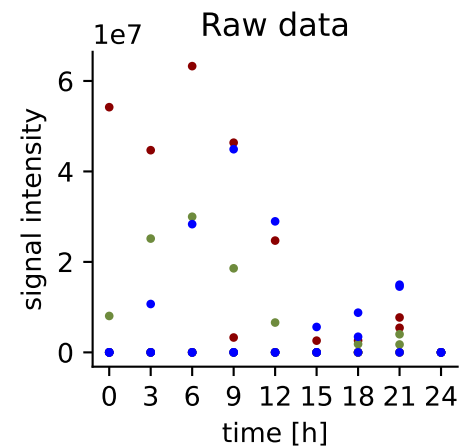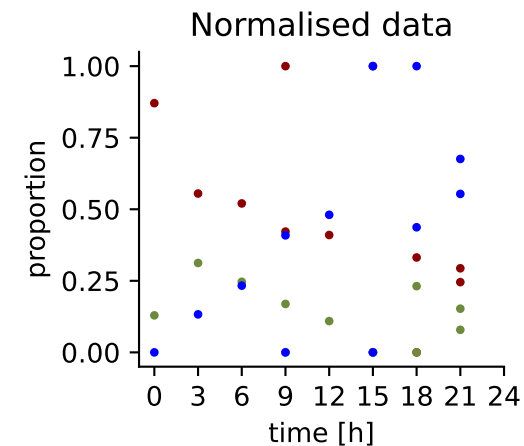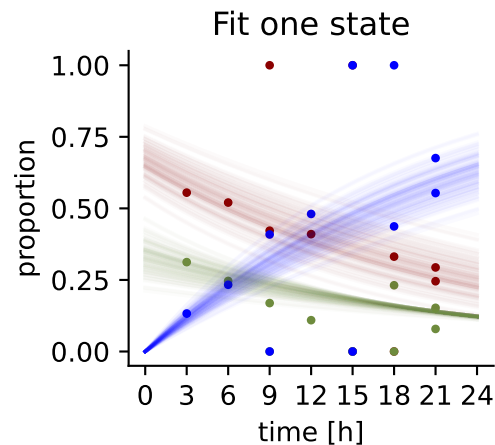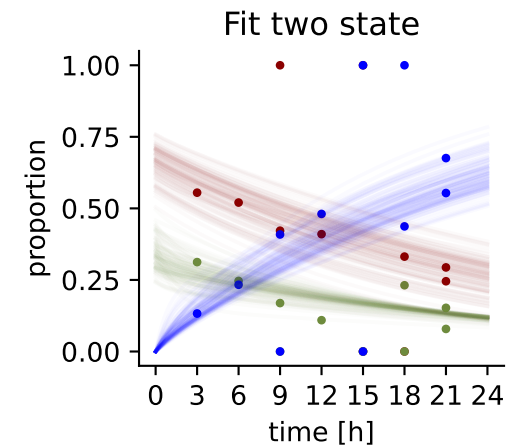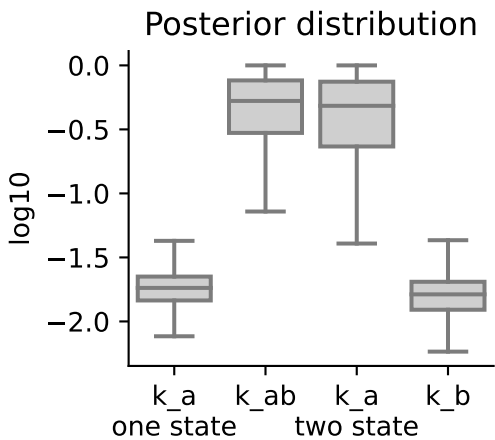

|                          |          |
|--------------------------|----------|
| p value                  | 7.12E-01 |
| log likelihood one state | -0.224   |
| log likelihood two state | 0.115    |
| rmse one state           | 0.625    |
| rmse two state           | 0.606    |
| k_a one state            | 0.018    |
| k_ab                     | 0.528    |
| k_a two state            | 0.483    |
| k_b                      | 0.016    |
| sigma one state          | 0.233    |
| sigma two state          | 0.233    |

bL35m  
MRPL35  
Q9NZE8  
39S ribosomal protein L35, mitochondrial

Cell lysate

Mitochondria

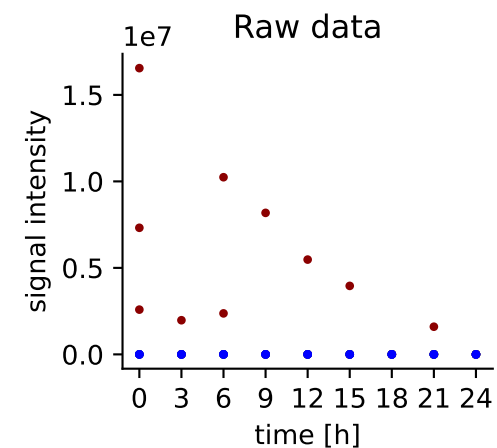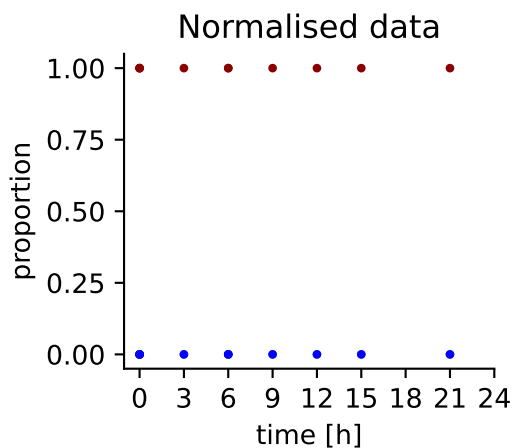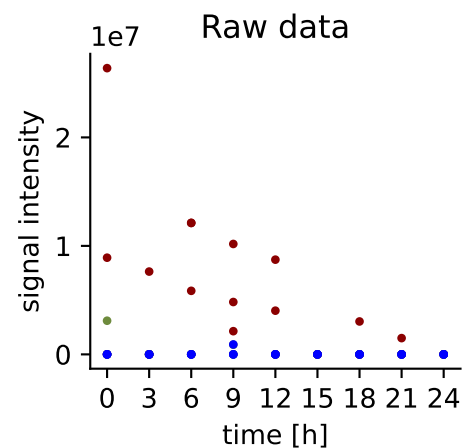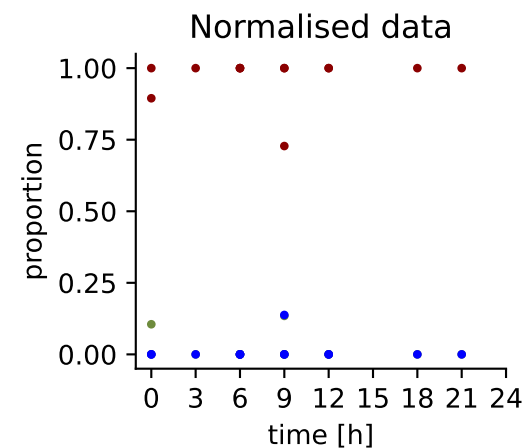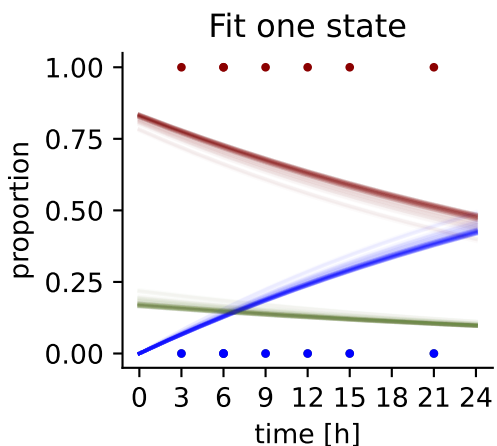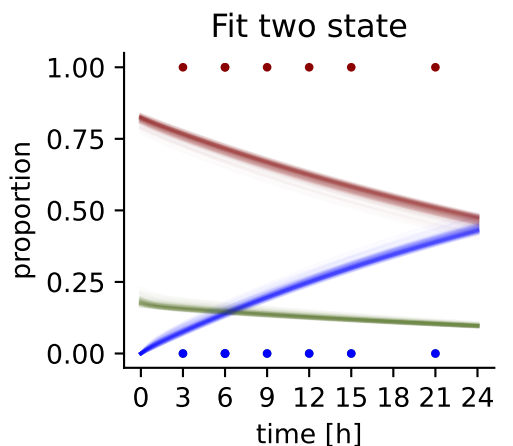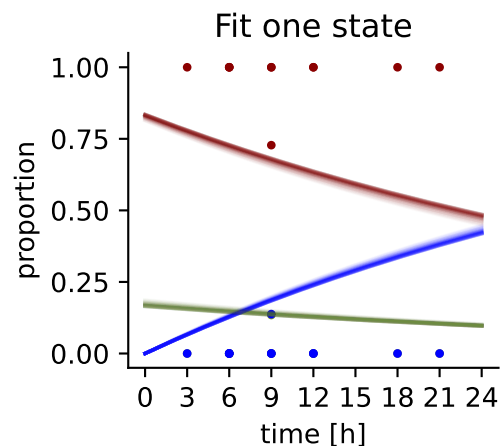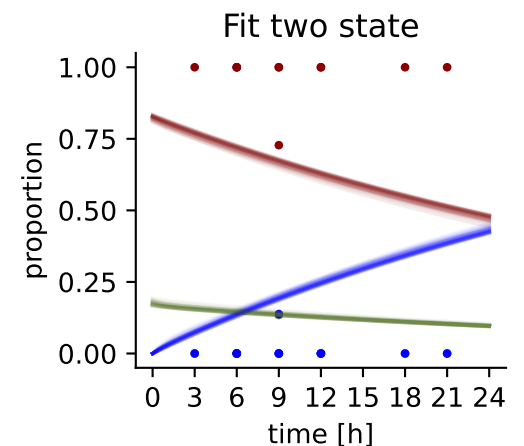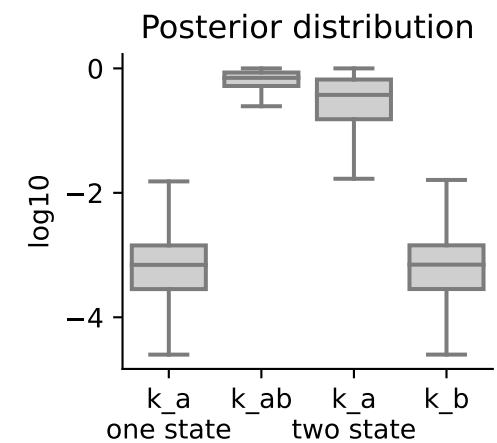

|                          |          |
|--------------------------|----------|
| p value                  | 1.00E+00 |
| log likelihood one state | -0.5     |
| log likelihood two state | -0.51    |
| rmse one state           | 0.275    |
| rmse two state           | 0.275    |
| k_a one state            | 0.001    |
| k_ab                     | 0.704    |
| k_a two state            | 0.375    |
| k_b                      | 0.001    |
| sigma one state          | 0.236    |
| sigma two state          | 0.24     |

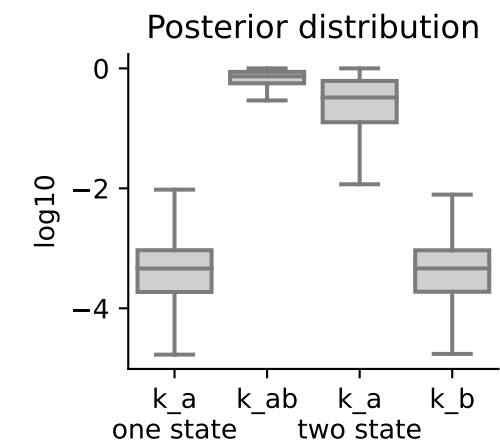

|                          |          |
|--------------------------|----------|
| p value                  | 1.00E+00 |
| log likelihood one state | 1.004    |
| log likelihood two state | 0.997    |
| rmse one state           | 0.264    |
| rmse two state           | 0.264    |
| k_a one state            | 0.0      |
| k_ab                     | 0.738    |
| k_a two state            | 0.327    |
| k_b                      | 0.0      |
| sigma one state          | 0.229    |
| sigma two state          | 0.232    |

mL37  
MRPL37  
Q9BZE1  
39S ribosomal protein L37, mitochondrial

Cell lysate

Mitochondria

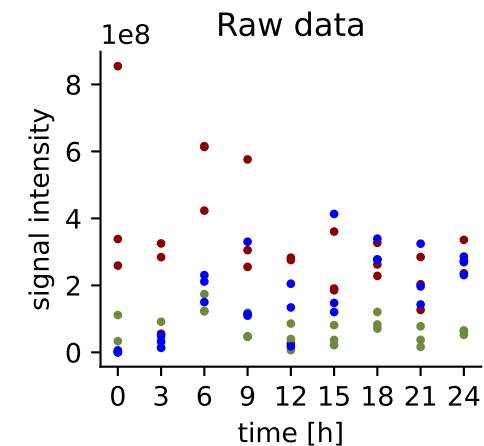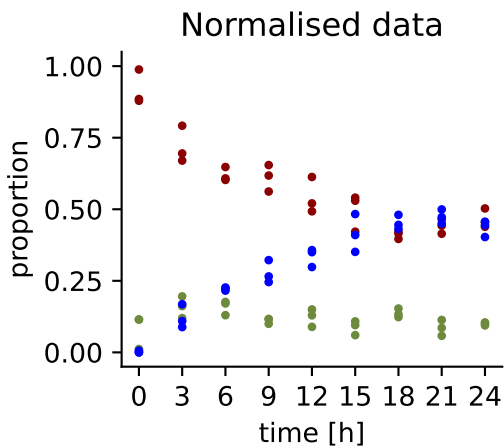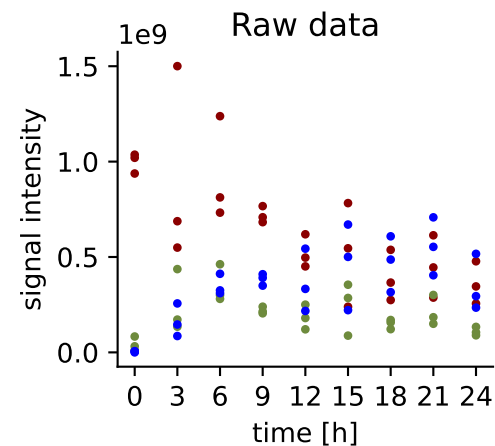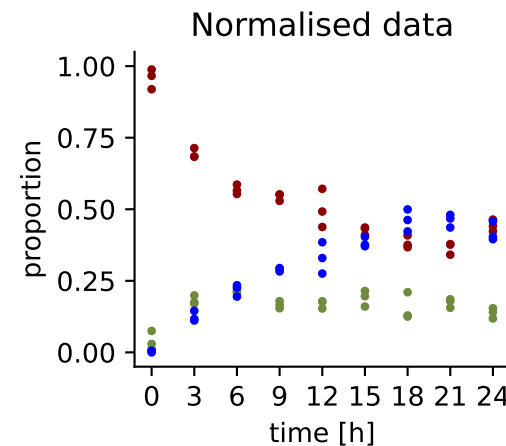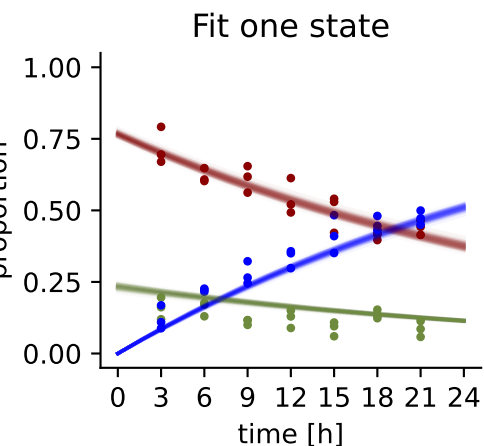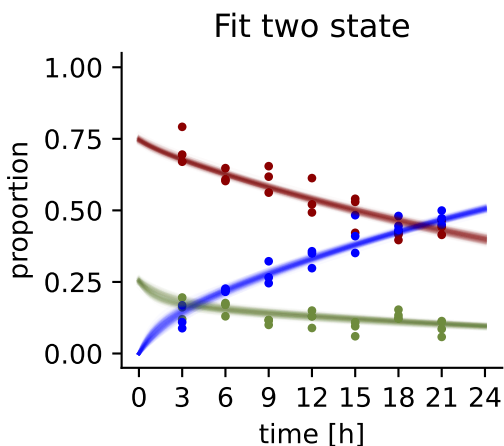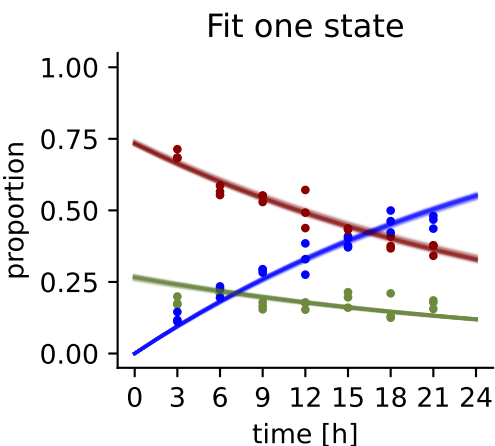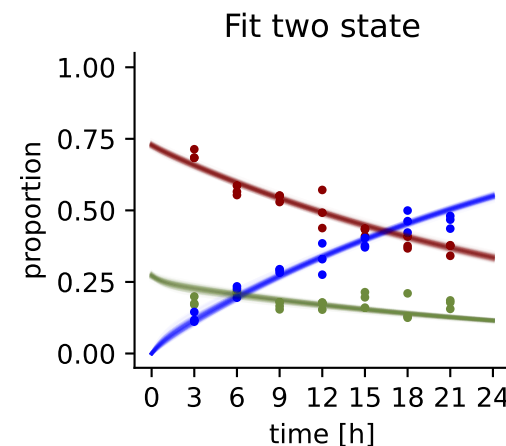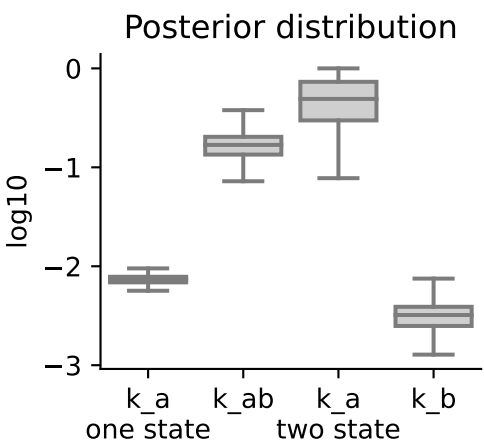

|                          |          |
|--------------------------|----------|
| p value                  | 9.52E-08 |
| log likelihood one state | 99.281   |
| log likelihood two state | 115.448  |
| rmse one state           | 0.344    |
| rmse two state           | 0.29     |
| k_a one state            | 0.007    |
| k_ab                     | 0.169    |
| k_a two state            | 0.492    |
| k_b                      | 0.003    |
| sigma one state          | 0.051    |
| sigma two state          | 0.04     |

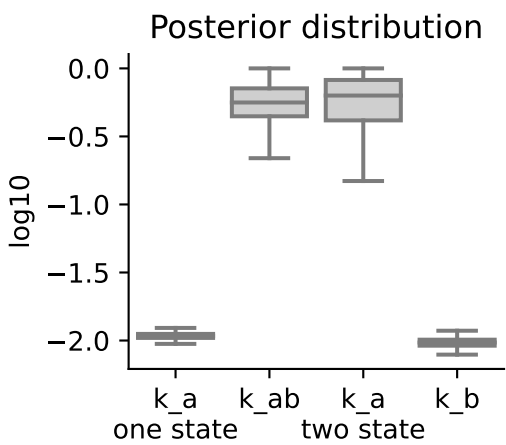

|                          |          |
|--------------------------|----------|
| p value                  | 2.80E-02 |
| log likelihood one state | 121.543  |
| log likelihood two state | 125.119  |
| rmse one state           | 0.333    |
| rmse two state           | 0.308    |
| k_a one state            | 0.011    |
| k_ab                     | 0.562    |
| k_a two state            | 0.631    |
| k_b                      | 0.01     |
| sigma one state          | 0.036    |
| sigma two state          | 0.034    |

mL38  
MRPL38  
Q96DV4  
39S ribosomal protein L38, mitochondrial

Cell lysate

Mitochondria

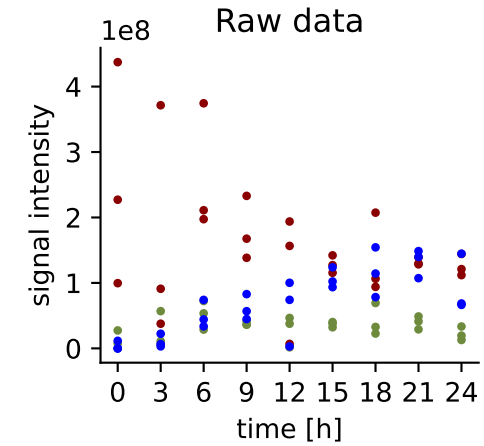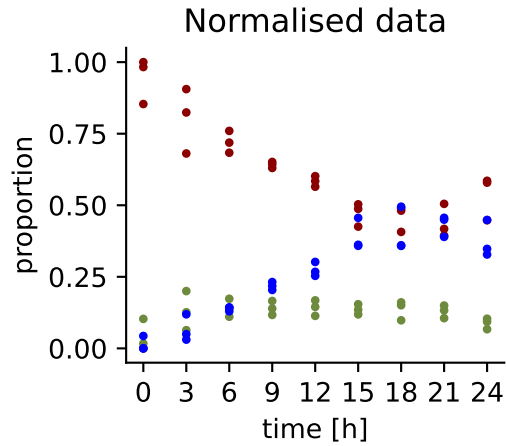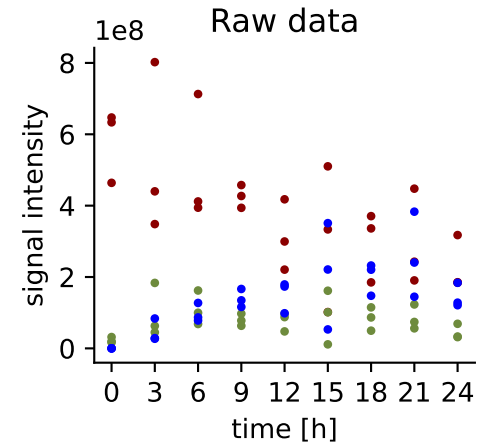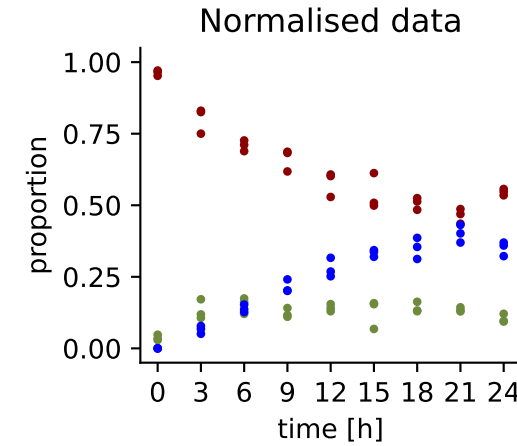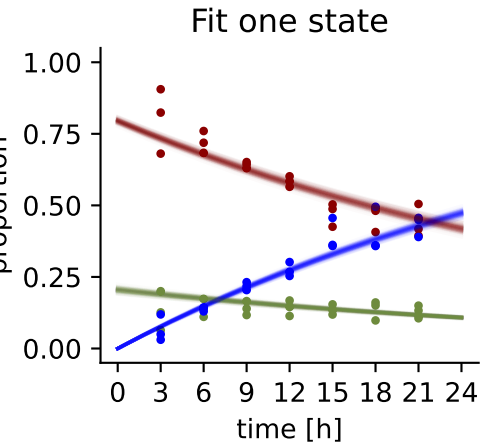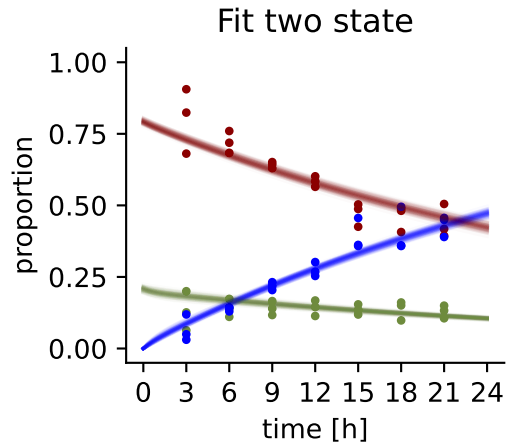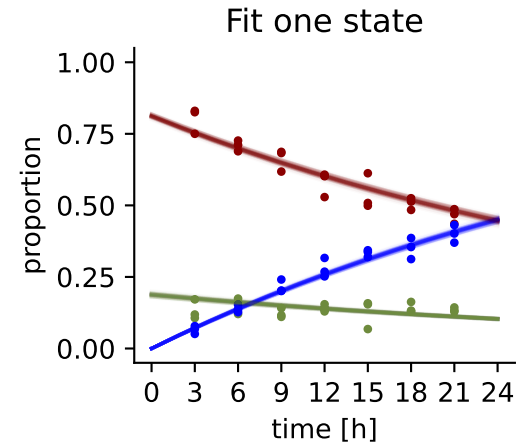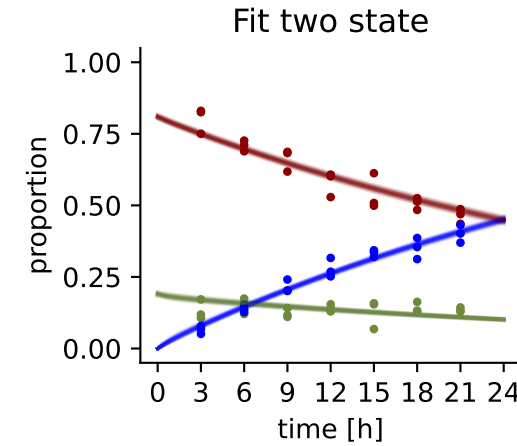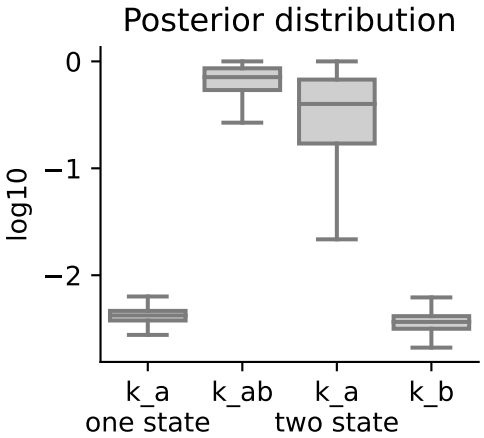

|                          |          |
|--------------------------|----------|
| p value                  | 9.58E-01 |
| log likelihood one state | 99.785   |
| log likelihood two state | 99.828   |
| rmse one state           | 0.319    |
| rmse two state           | 0.315    |
| k_a one state            | 0.004    |
| k_ab                     | 0.712    |
| k_a two state            | 0.4      |
| k_b                      | 0.004    |
| sigma one state          | 0.051    |
| sigma two state          | 0.051    |

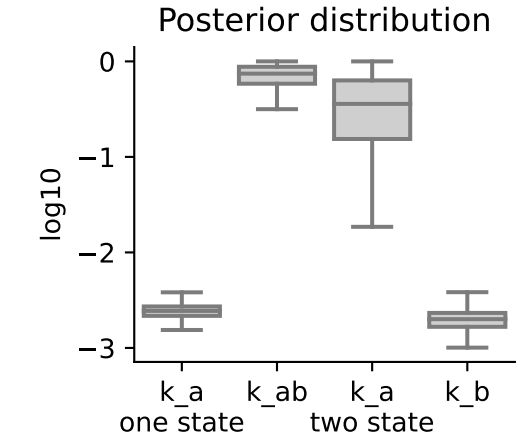

|                          |          |
|--------------------------|----------|
| p value                  | 9.19E-01 |
| log likelihood one state | 125.777  |
| log likelihood two state | 125.861  |
| rmse one state           | 0.288    |
| rmse two state           | 0.284    |
| k_a one state            | 0.002    |
| k_ab                     | 0.744    |
| k_a two state            | 0.359    |
| k_b                      | 0.002    |
| sigma one state          | 0.034    |
| sigma two state          | 0.034    |

mL39  
MRPL39  
Q9NYK5  
39S ribosomal protein L39, mitochondrial

Cell lysate

Mitochondria

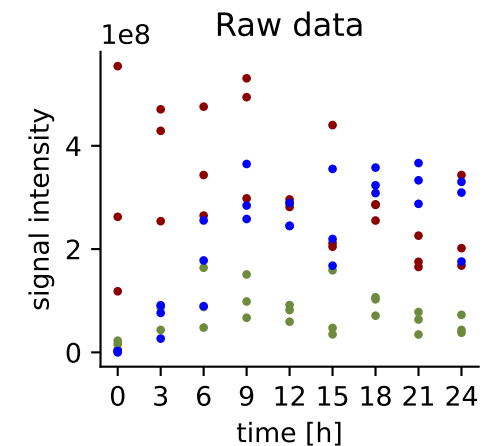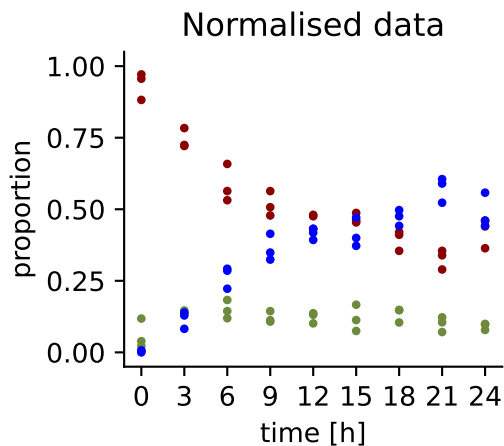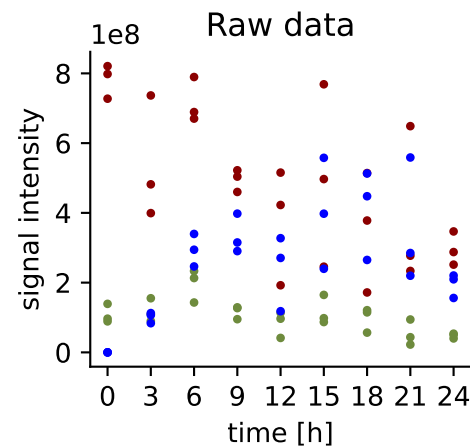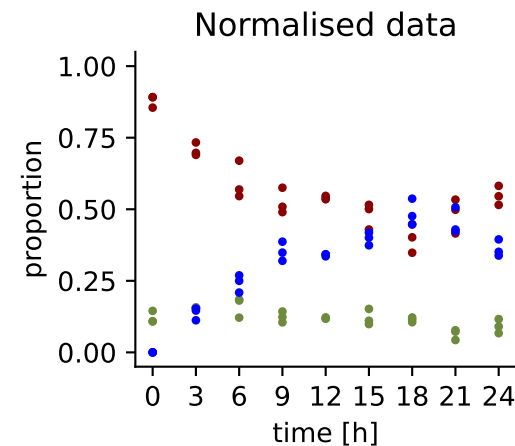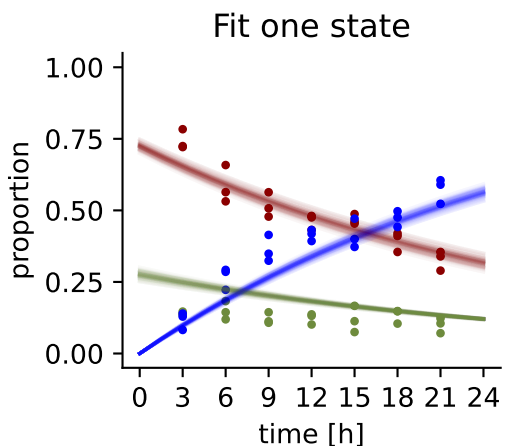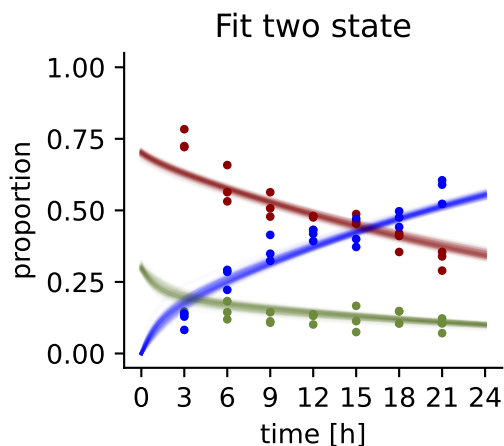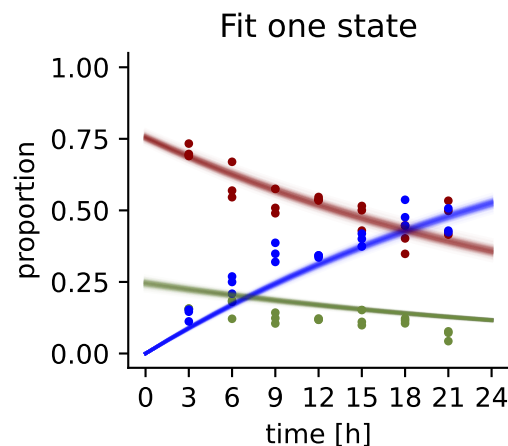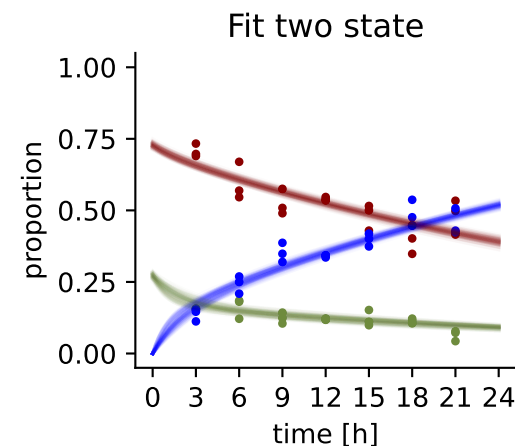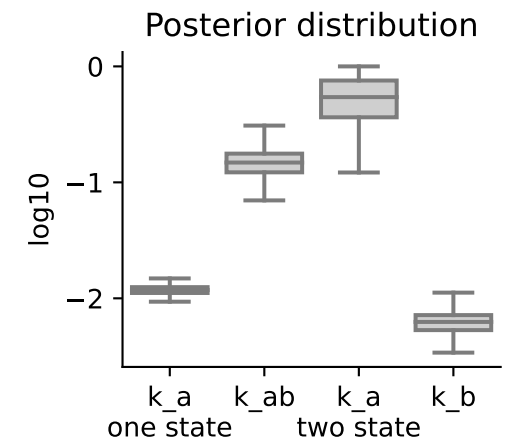

|                          |          |
|--------------------------|----------|
| p value                  | 8.26E-08 |
| log likelihood one state | 84.428   |
| log likelihood two state | 100.738  |
| rmse one state           | 0.39     |
| rmse two state           | 0.315    |
| k_a one state            | 0.012    |
| k_ab                     | 0.148    |
| k_a two state            | 0.543    |
| k_b                      | 0.006    |
| sigma one state          | 0.065    |
| sigma two state          | 0.051    |

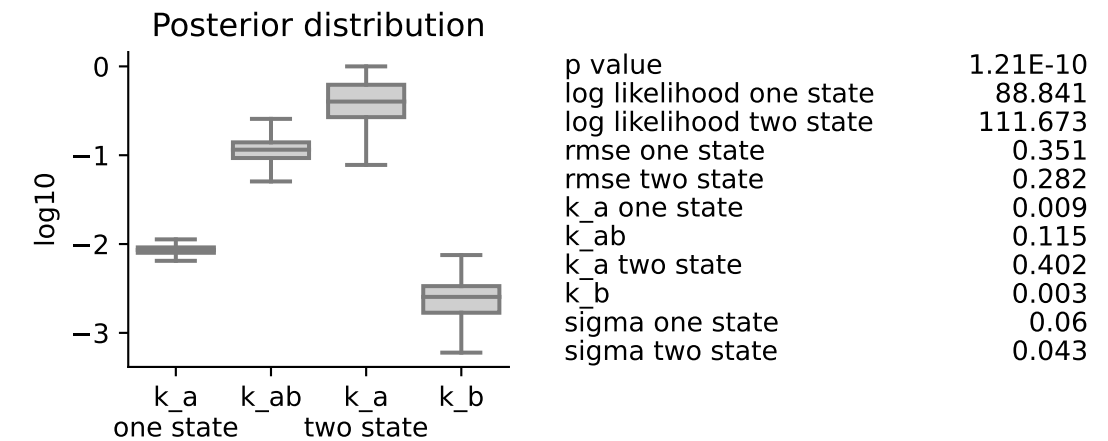

|                          |          |
|--------------------------|----------|
| p value                  | 1.21E-10 |
| log likelihood one state | 88.841   |
| log likelihood two state | 111.673  |
| rmse one state           | 0.351    |
| rmse two state           | 0.282    |
| k_a one state            | 0.009    |
| k_ab                     | 0.115    |
| k_a two state            | 0.402    |
| k_b                      | 0.003    |
| sigma one state          | 0.06     |
| sigma two state          | 0.043    |



mL40  
MRPL40  
Q9NQ50  
39S ribosomal protein L40, mitochondrial

Cell lysate

Mitochondria

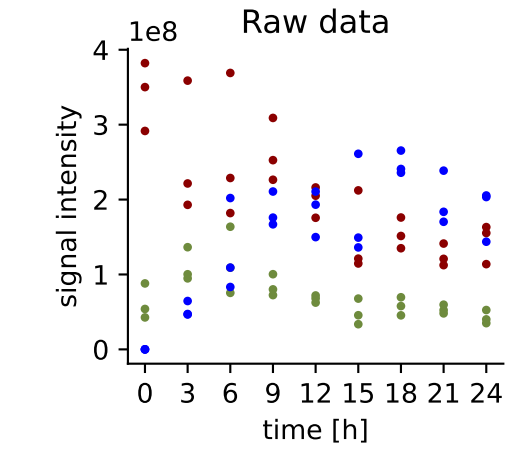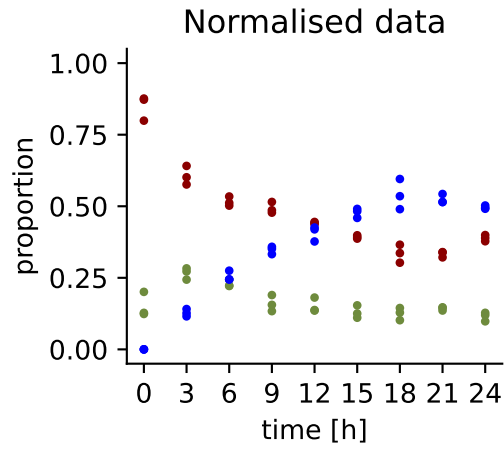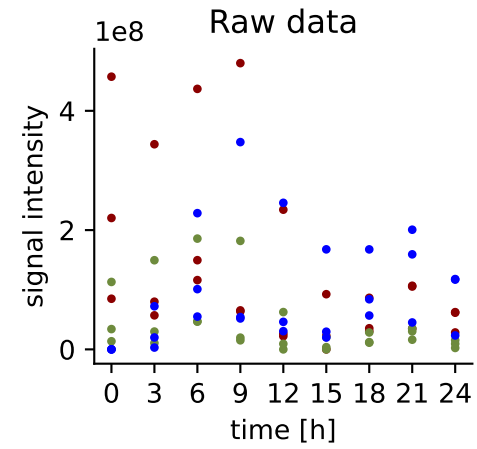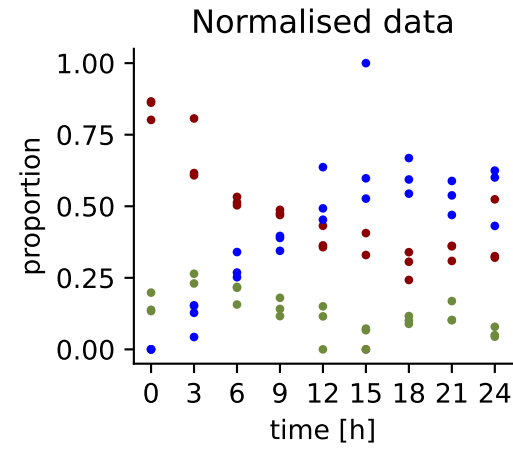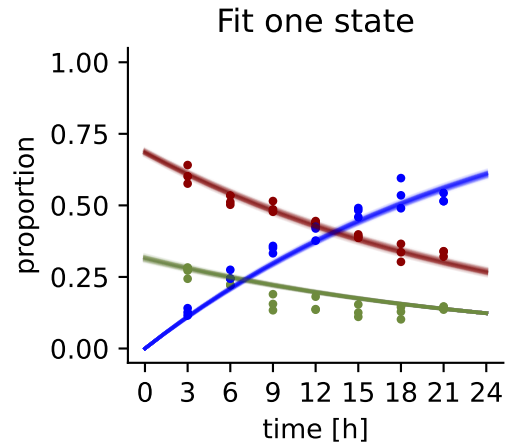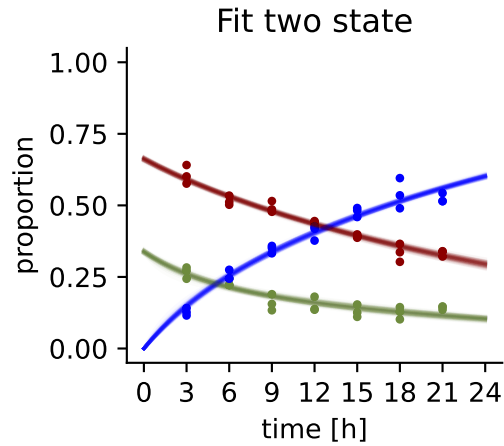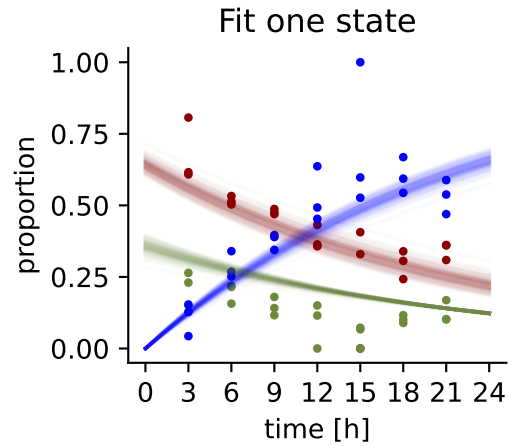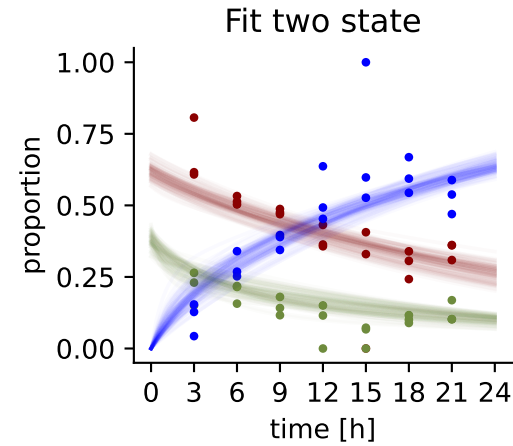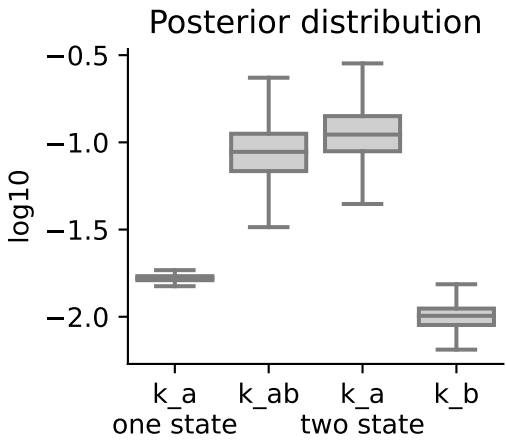

|                          |          |
|--------------------------|----------|
| p value                  | 1.08E-11 |
| log likelihood one state | 118.721  |
| log likelihood two state | 143.976  |
| rmse one state           | 0.38     |
| rmse two state           | 0.342    |
| k_a one state            | 0.017    |
| k_ab                     | 0.088    |
| k_a two state            | 0.111    |
| k_b                      | 0.01     |
| sigma one state          | 0.037    |
| sigma two state          | 0.026    |

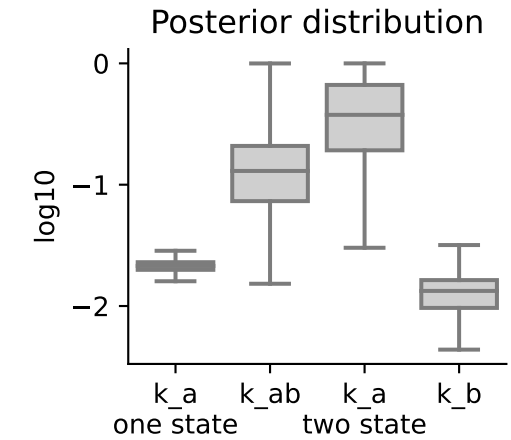

|                          |          |
|--------------------------|----------|
| p value                  | 3.03E-04 |
| log likelihood one state | 46.577   |
| log likelihood two state | 54.679   |
| rmse one state           | 0.483    |
| rmse two state           | 0.425    |
| k_a one state            | 0.021    |
| k_ab                     | 0.13     |
| k_a two state            | 0.376    |
| k_b                      | 0.013    |
| sigma one state          | 0.117    |
| sigma two state          | 0.107    |

mL41  
MRPL41  
Q8IXM3  
39S ribosomal protein L41, mitochondrial

Cell lysate

Mitochondria

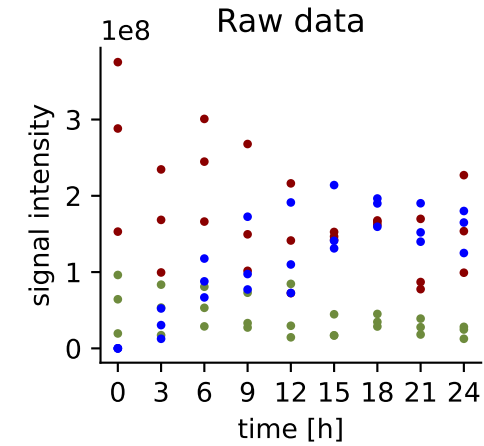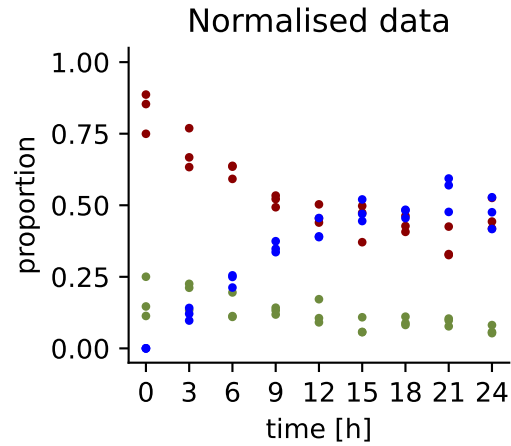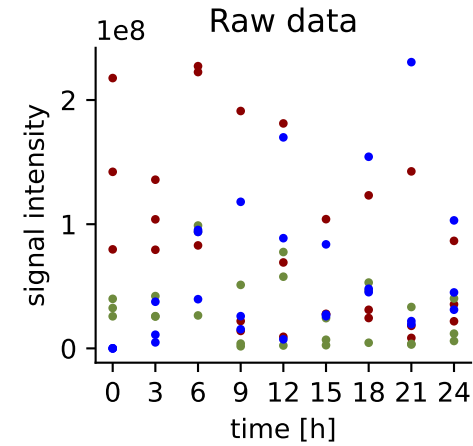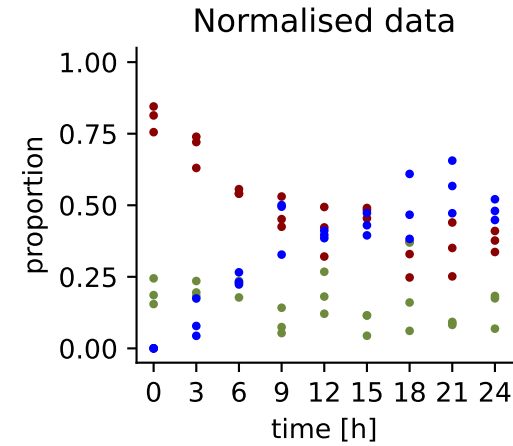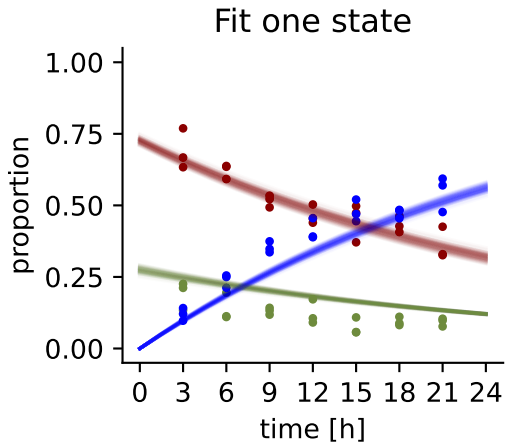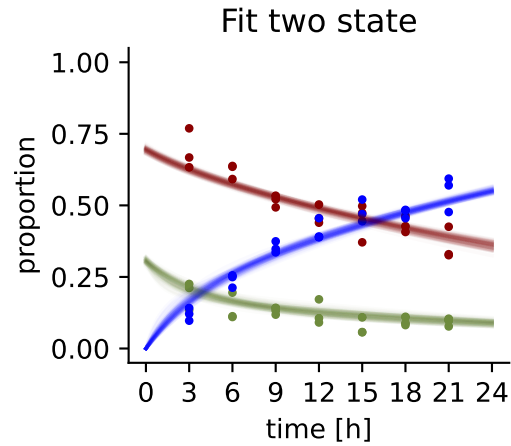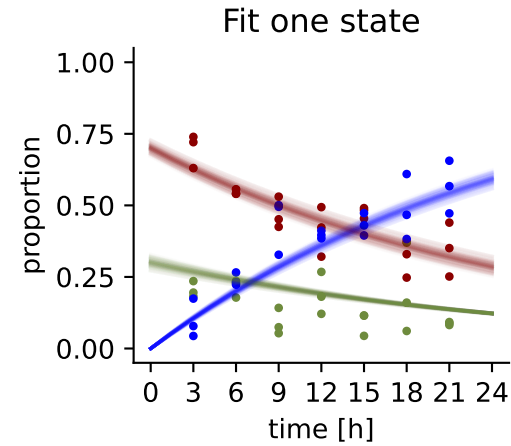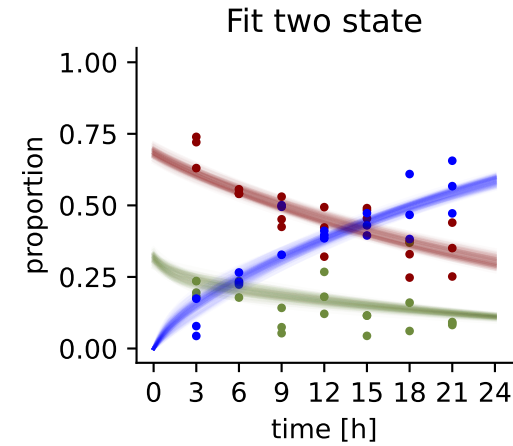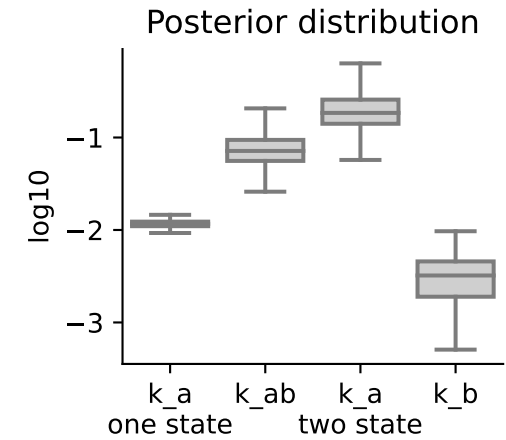

|                          |          |
|--------------------------|----------|
| p value                  | 5.35E-11 |
| log likelihood one state | 85.642   |
| log likelihood two state | 109.293  |
| rmse one state           | 0.388    |
| rmse two state           | 0.331    |
| k_a one state            | 0.012    |
| k_ab                     | 0.072    |
| k_a two state            | 0.185    |
| k_b                      | 0.003    |
| sigma one state          | 0.063    |
| sigma two state          | 0.045    |

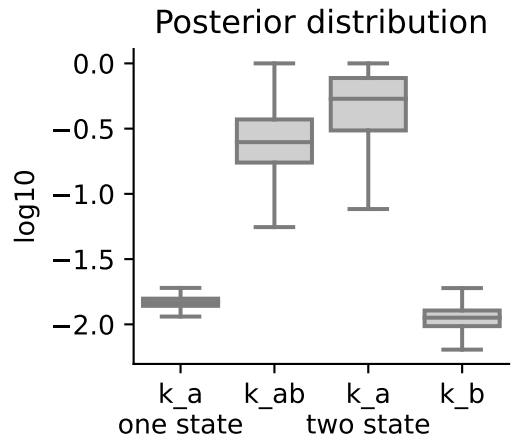

|                          |          |
|--------------------------|----------|
| p value                  | 4.98E-03 |
| log likelihood one state | 67.994   |
| log likelihood two state | 73.297   |
| rmse one state           | 0.403    |
| rmse two state           | 0.355    |
| k_a one state            | 0.015    |
| k_ab                     | 0.249    |
| k_a two state            | 0.535    |
| k_b                      | 0.011    |
| sigma one state          | 0.083    |
| sigma two state          | 0.079    |

mL42  
MRPL42  
Q9Y6G3  
39S ribosomal protein L42, mitochondrial

Cell lysate

Mitochondria

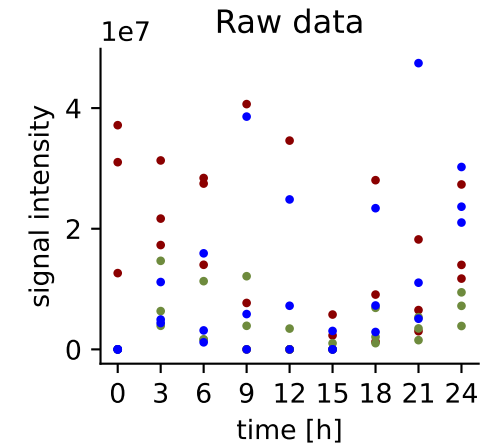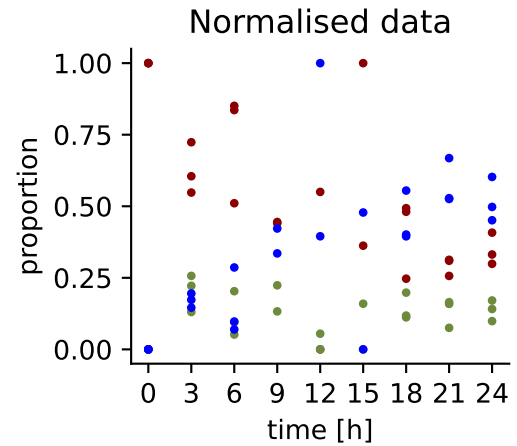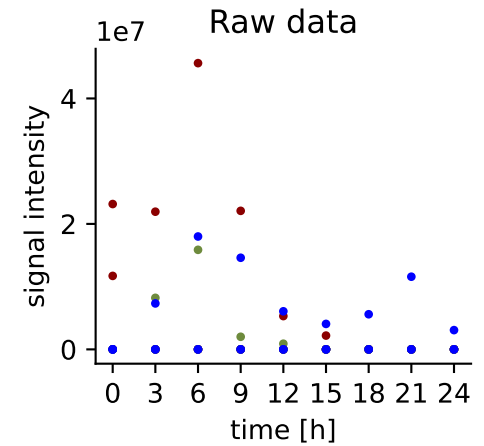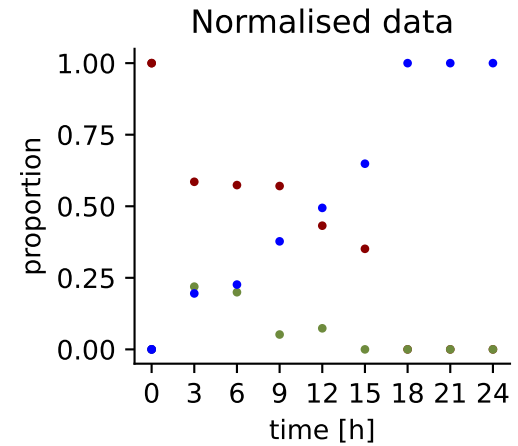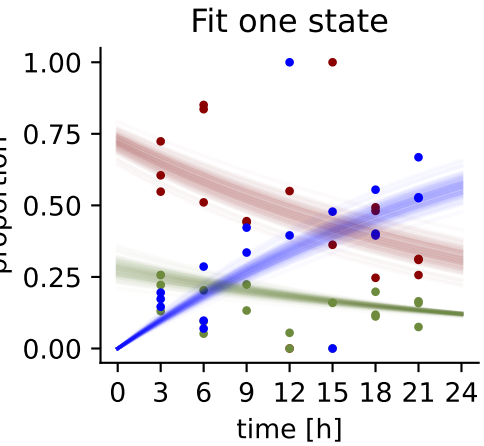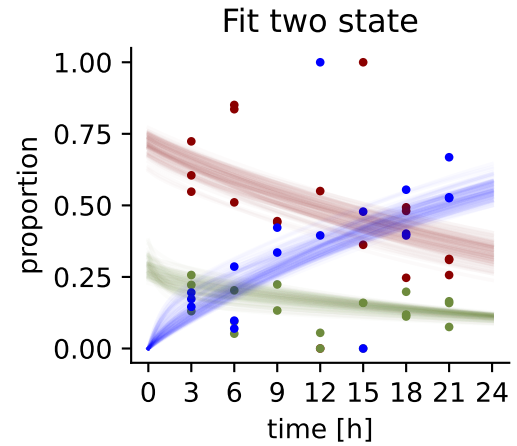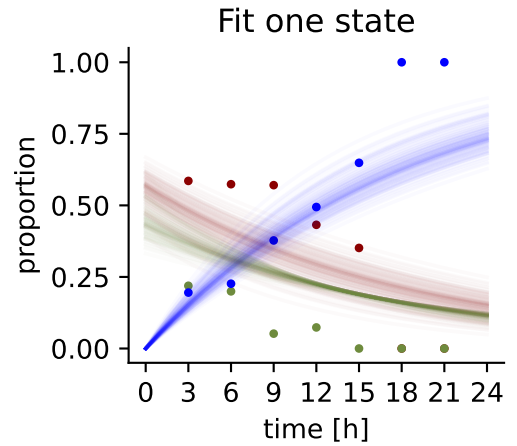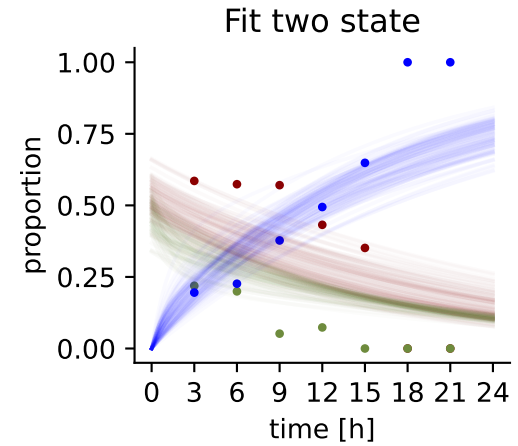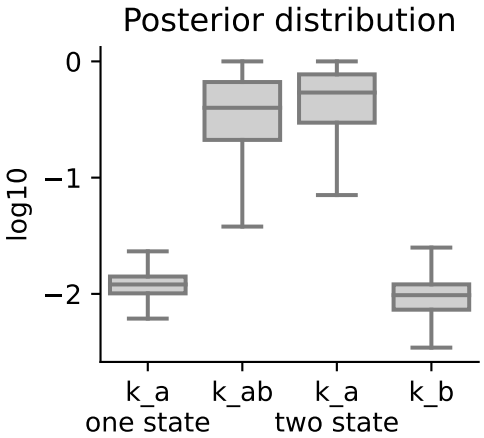

|                          |          |
|--------------------------|----------|
| p value                  | 2.17E-01 |
| log likelihood one state | 17.326   |
| log likelihood two state | 18.855   |
| rmse one state           | 0.48     |
| rmse two state           | 0.431    |
| k_a one state            | 0.012    |
| k_ab                     | 0.399    |
| k_a two state            | 0.54     |
| k_b                      | 0.01     |
| sigma one state          | 0.175    |
| sigma two state          | 0.173    |

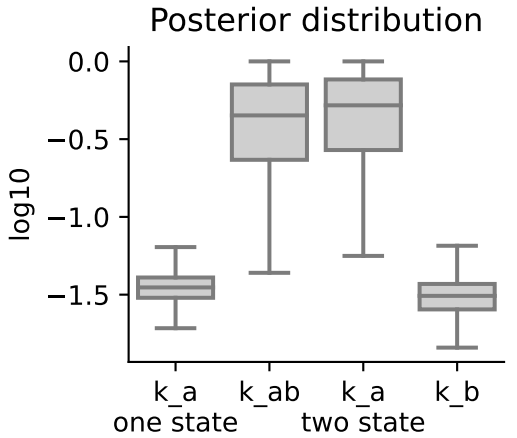

|                          |          |
|--------------------------|----------|
| p value                  | 3.65E-01 |
| log likelihood one state | 7.04     |
| log likelihood two state | 8.047    |
| rmse one state           | 0.655    |
| rmse two state           | 0.606    |
| k_a one state            | 0.035    |
| k_ab                     | 0.449    |
| k_a two state            | 0.522    |
| k_b                      | 0.031    |
| sigma one state          | 0.171    |
| sigma two state          | 0.169    |

mL43  
MRPL43  
Q8N983  
39S ribosomal protein L43, mitochondrial

Cell lysate

Mitochondria

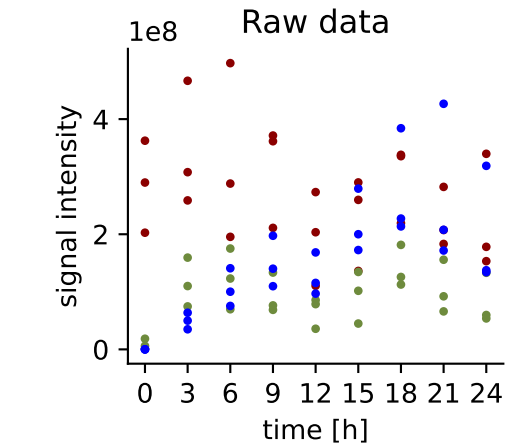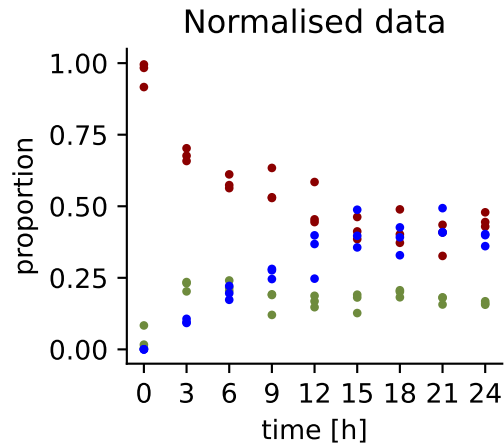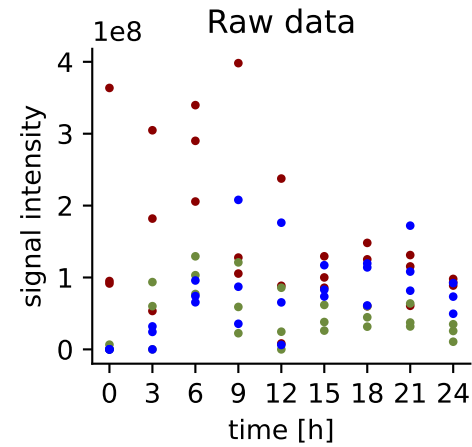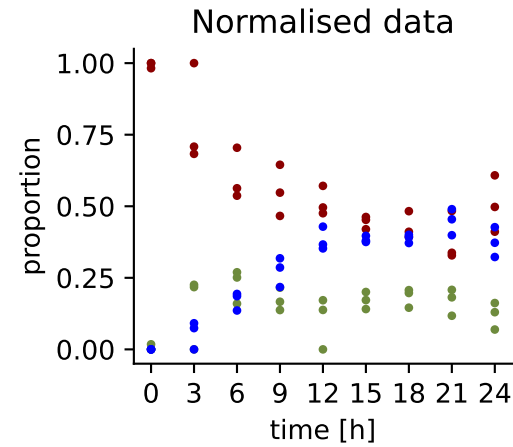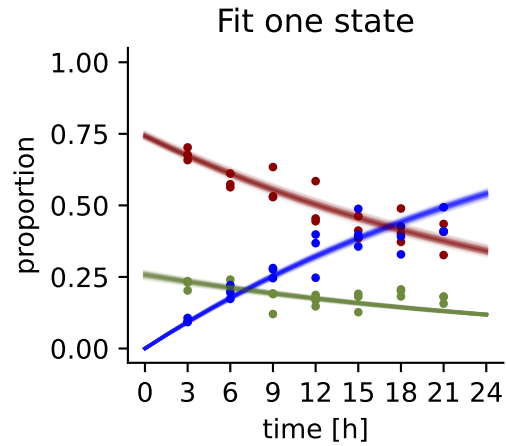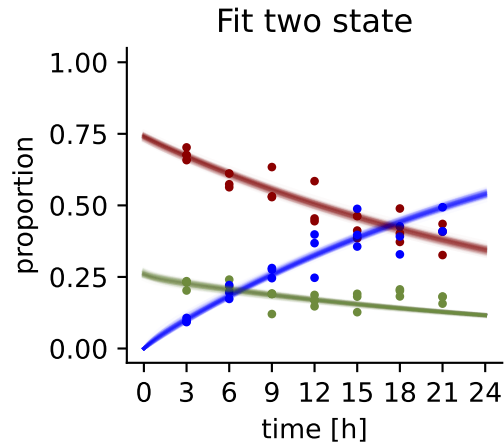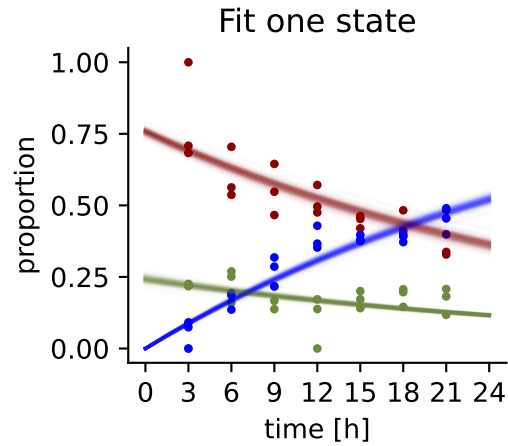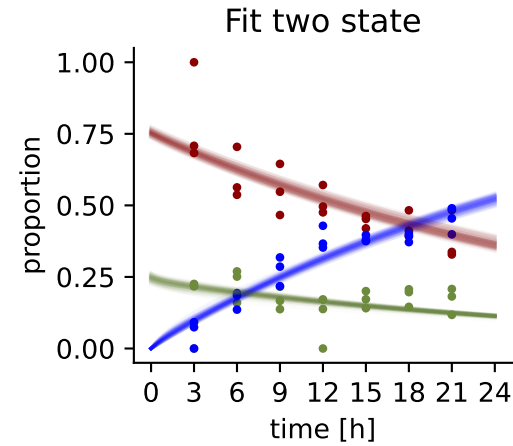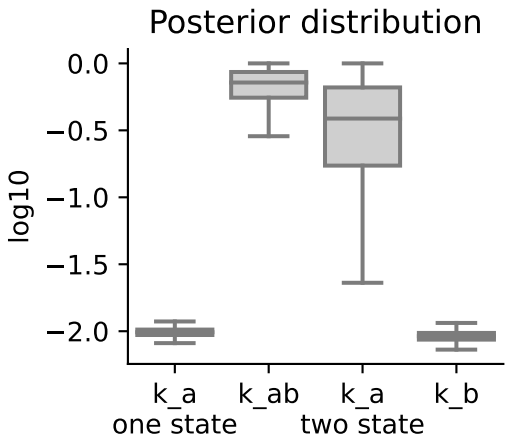

|                          |          |
|--------------------------|----------|
| p value                  | 8.85E-01 |
| log likelihood one state | 105.273  |
| log likelihood two state | 105.395  |
| rmse one state           | 0.32     |
| rmse two state           | 0.313    |
| k_a one state            | 0.01     |
| k_ab                     | 0.72     |
| k_a two state            | 0.387    |
| k_b                      | 0.009    |
| sigma one state          | 0.046    |
| sigma two state          | 0.046    |

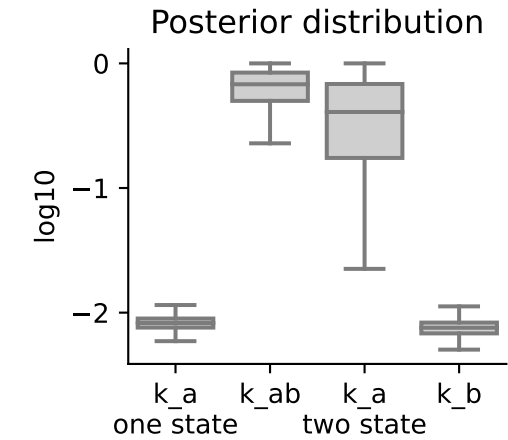

|                          |          |
|--------------------------|----------|
| p value                  | 9.81E-01 |
| log likelihood one state | 76.735   |
| log likelihood two state | 76.755   |
| rmse one state           | 0.344    |
| rmse two state           | 0.347    |
| k_a one state            | 0.008    |
| k_ab                     | 0.68     |
| k_a two state            | 0.407    |
| k_b                      | 0.008    |
| sigma one state          | 0.073    |
| sigma two state          | 0.073    |

mL44  
MRPL44  
Q9H9J2  
39S ribosomal protein L44, mitochondrial

Cell lysate

Mitochondria

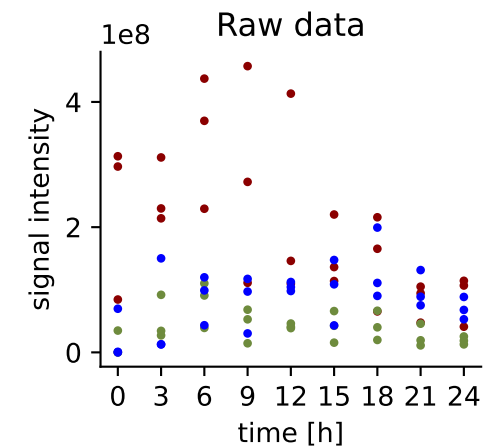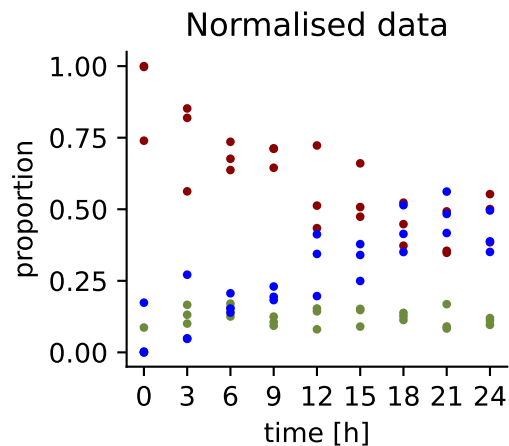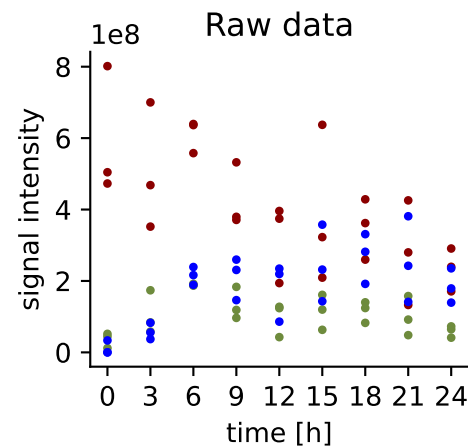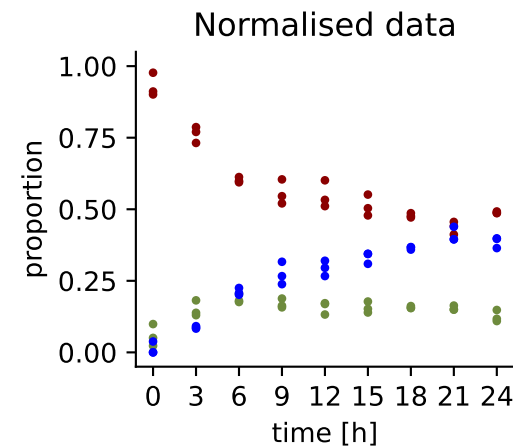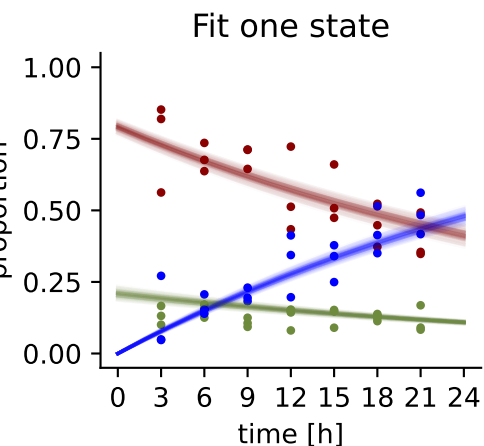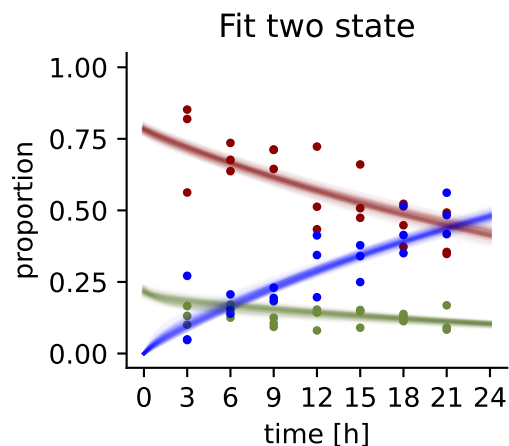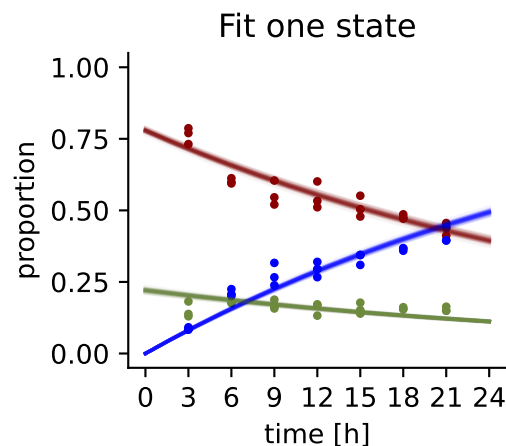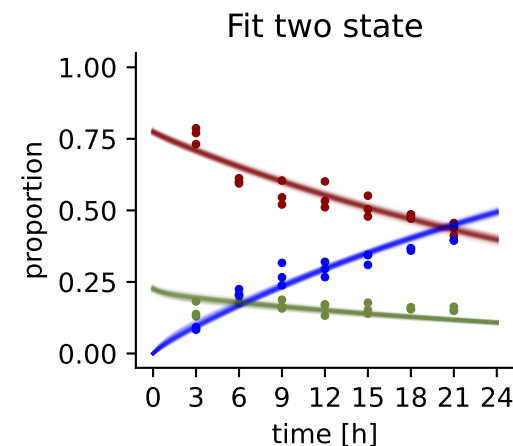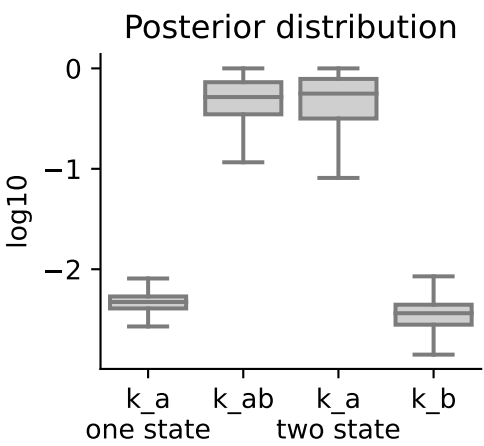

|                          |          |
|--------------------------|----------|
| p value                  | 2.63E-01 |
| log likelihood one state | 75.573   |
| log likelihood two state | 76.907   |
| rmse one state           | 0.338    |
| rmse two state           | 0.31     |
| k_a one state            | 0.005    |
| k_ab                     | 0.519    |
| k_a two state            | 0.561    |
| k_b                      | 0.004    |
| sigma one state          | 0.074    |
| sigma two state          | 0.073    |

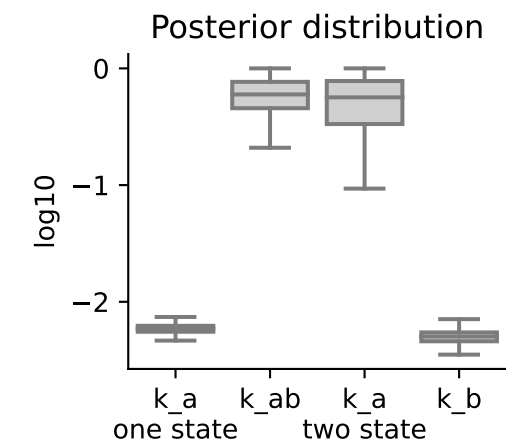

|                          |          |
|--------------------------|----------|
| p value                  | 1.37E-01 |
| log likelihood one state | 117.941  |
| log likelihood two state | 119.928  |
| rmse one state           | 0.296    |
| rmse two state           | 0.277    |
| k_a one state            | 0.006    |
| k_ab                     | 0.598    |
| k_a two state            | 0.565    |
| k_b                      | 0.005    |
| sigma one state          | 0.038    |
| sigma two state          | 0.037    |

mL45  
MRPL45  
Q9BRJ2  
39S ribosomal protein L45, mitochondrial

Cell lysate

Mitochondria

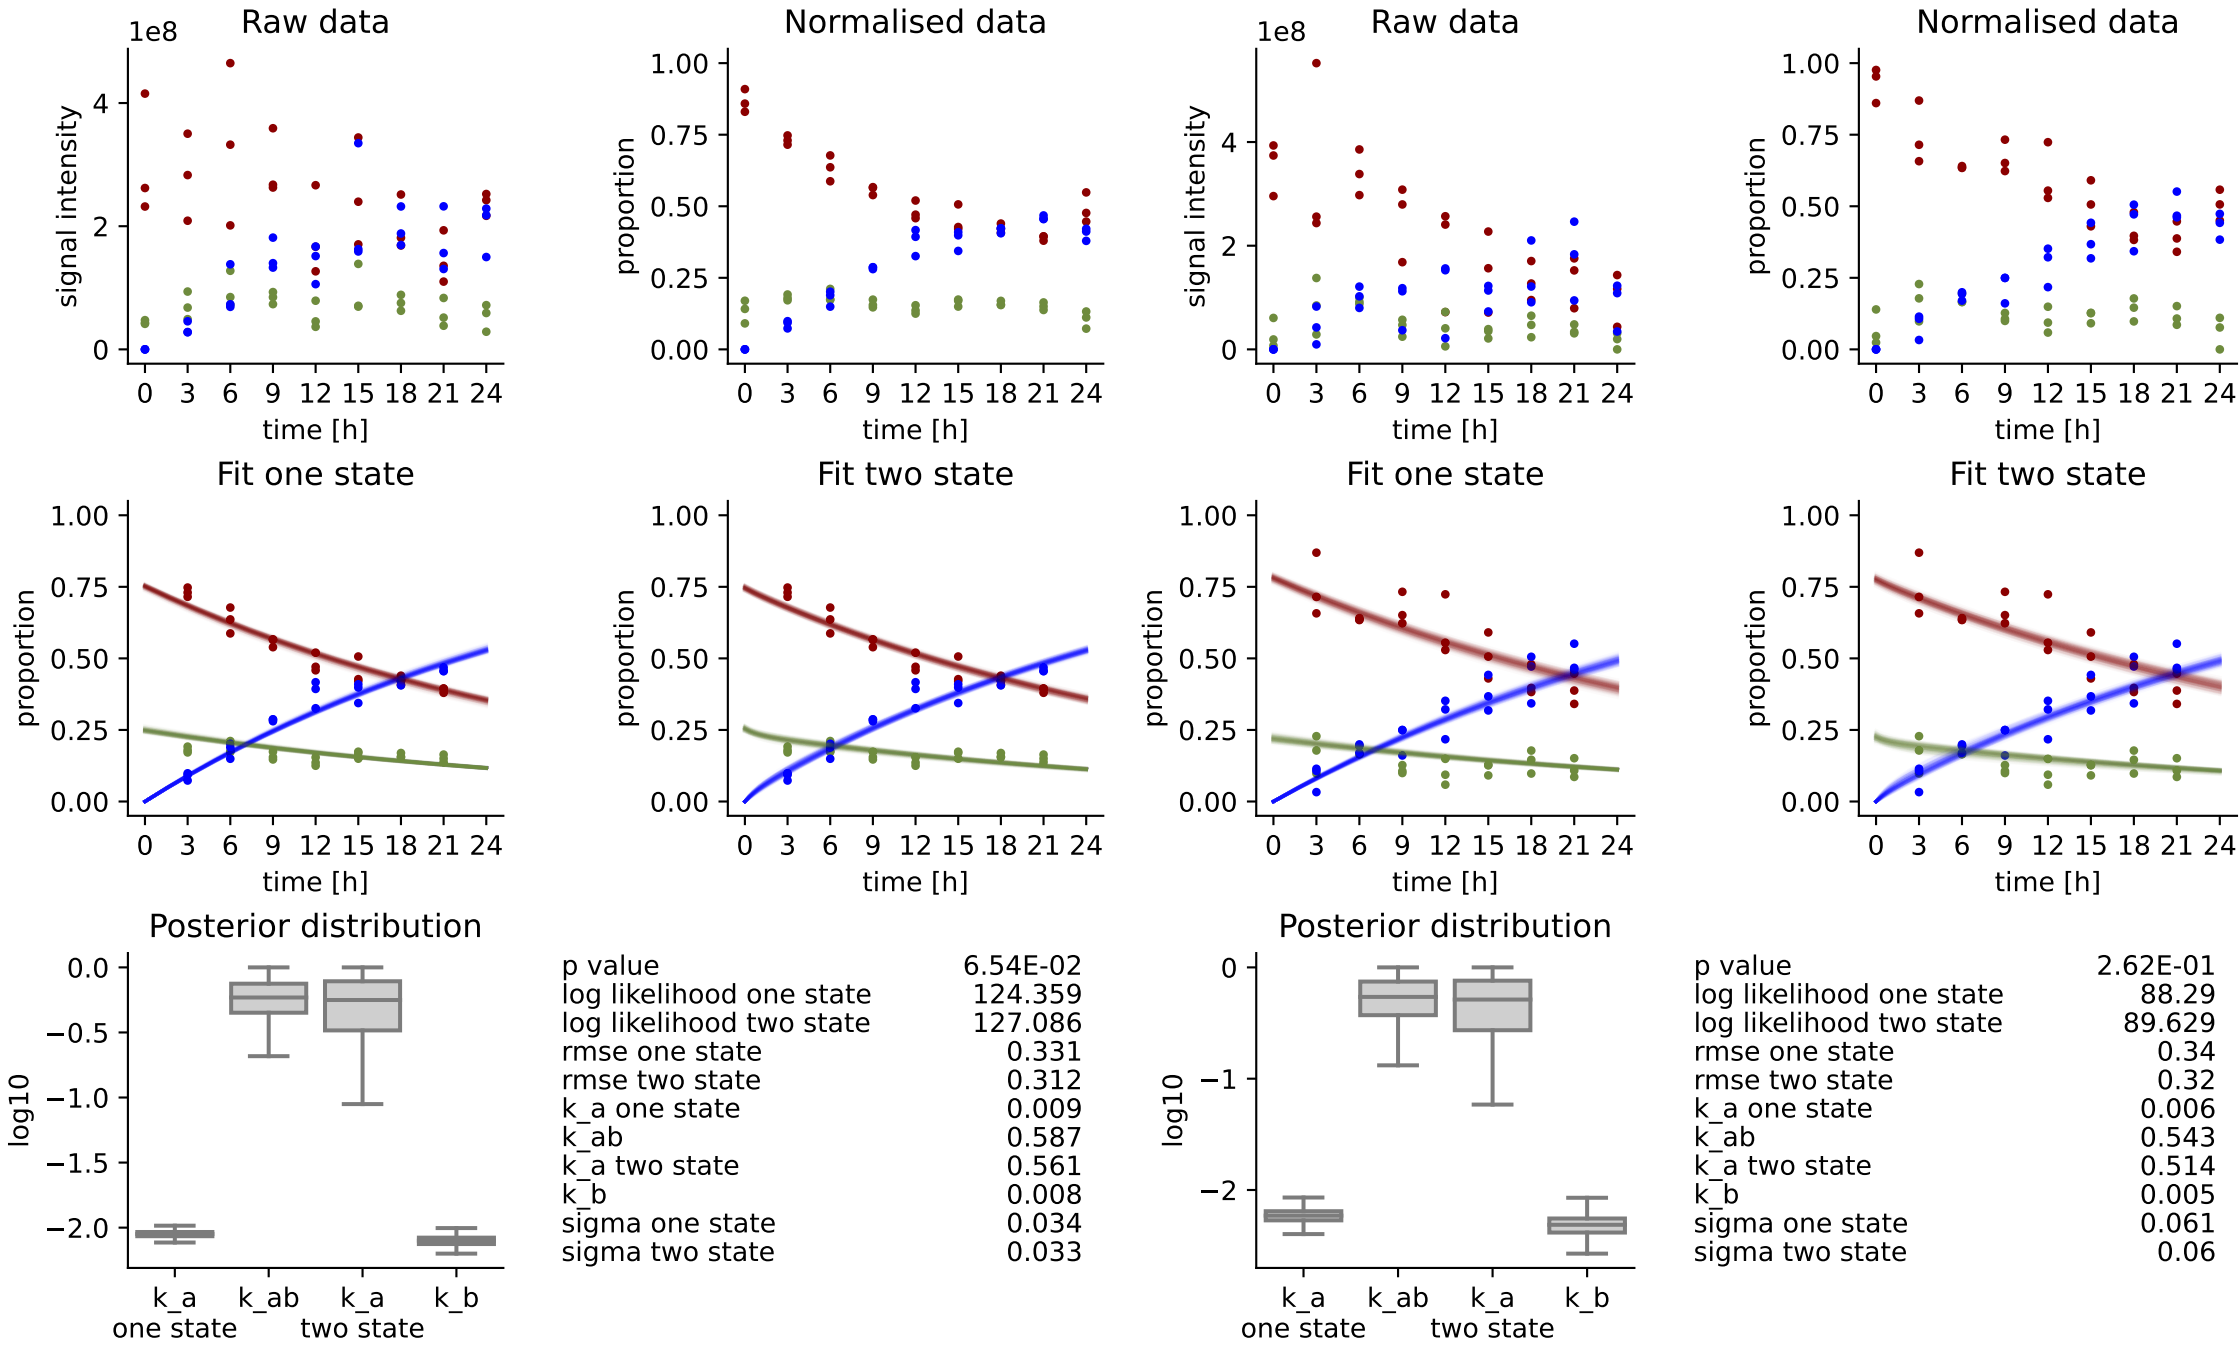

mL46  
MRPL46  
Q9H2W6  
39S ribosomal protein L46, mitochondrial

Cell lysate

Mitochondria

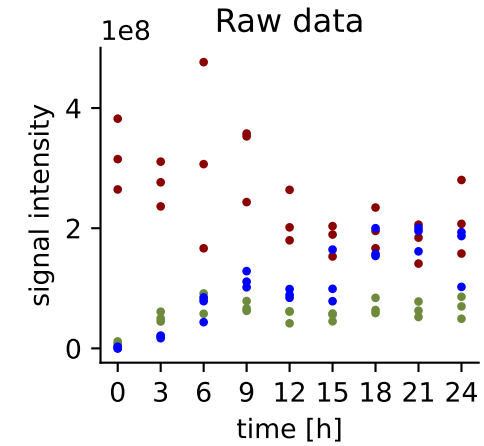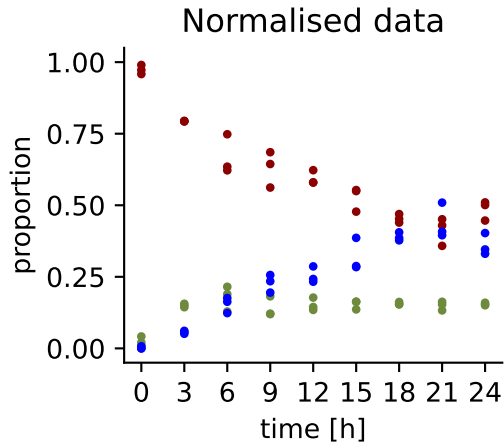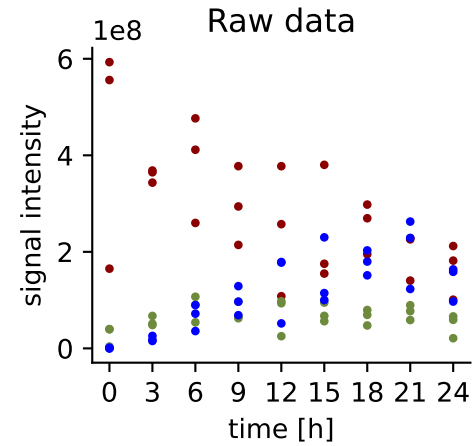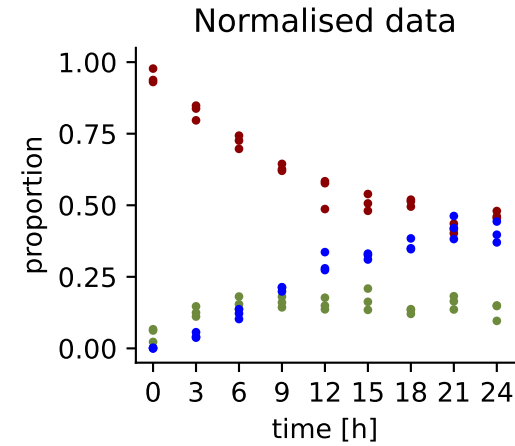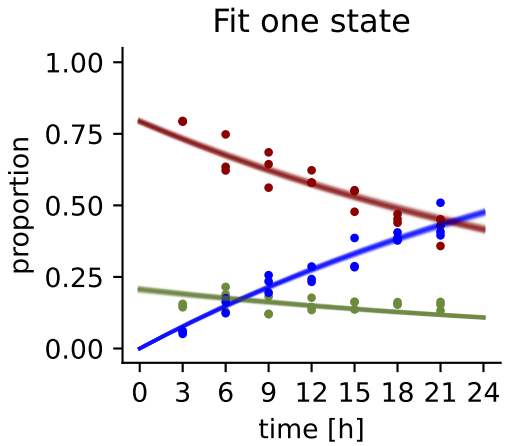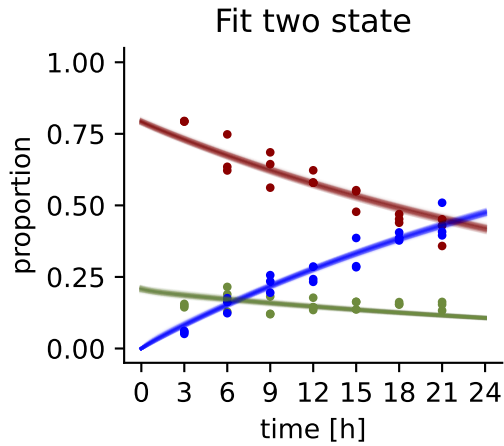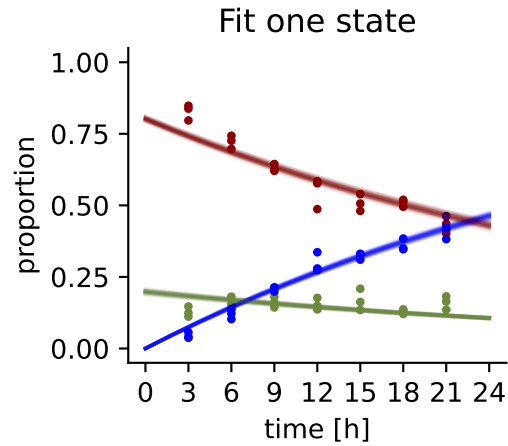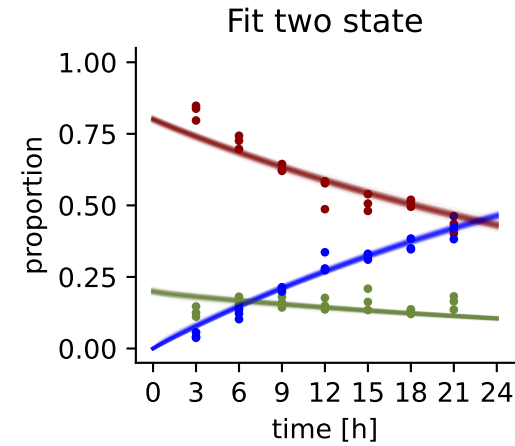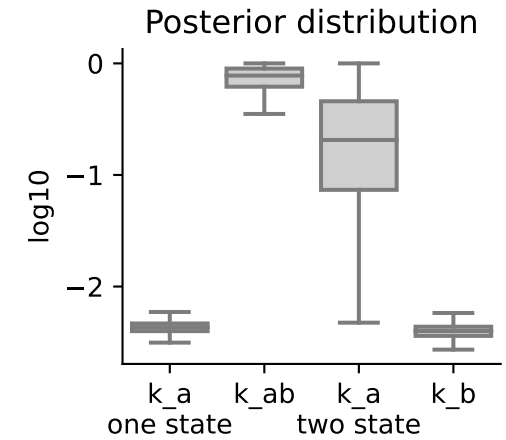

|                          |          |
|--------------------------|----------|
| p value                  | 4.36E-01 |
| log likelihood one state | 115.534  |
| log likelihood two state | 116.364  |
| rmse one state           | 0.301    |
| rmse two state           | 0.303    |
| k_a one state            | 0.004    |
| k_ab                     | 0.778    |
| k_a two state            | 0.206    |
| k_b                      | 0.004    |
| sigma one state          | 0.039    |
| sigma two state          | 0.04     |

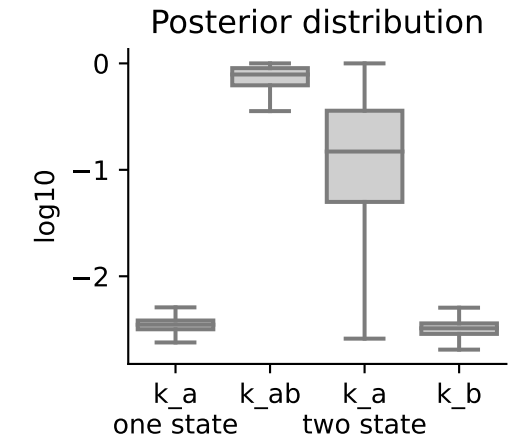

|                          |          |
|--------------------------|----------|
| p value                  | 2.83E-01 |
| log likelihood one state | 115.425  |
| log likelihood two state | 116.686  |
| rmse one state           | 0.298    |
| rmse two state           | 0.299    |
| k_a one state            | 0.004    |
| k_ab                     | 0.787    |
| k_a two state            | 0.149    |
| k_b                      | 0.003    |
| sigma one state          | 0.04     |
| sigma two state          | 0.04     |



mL48  
MRPL48  
Q96GC5  
39S ribosomal protein L48, mitochondrial

Cell lysate

Mitochondria

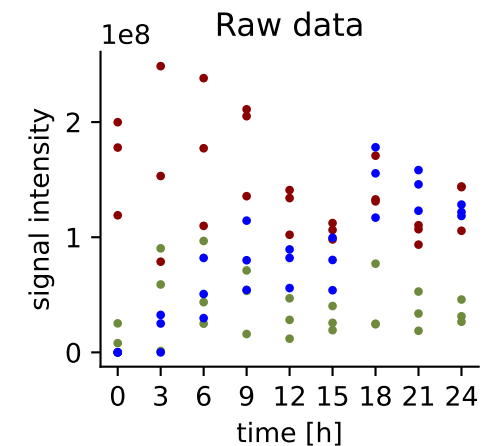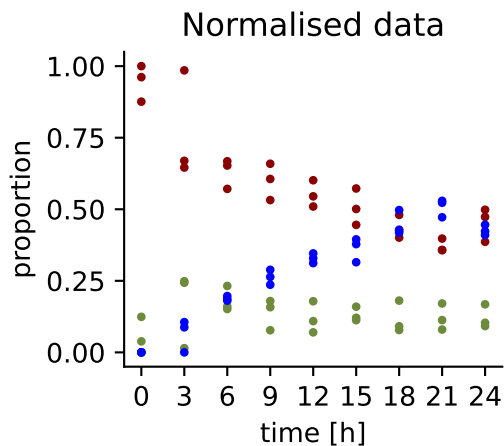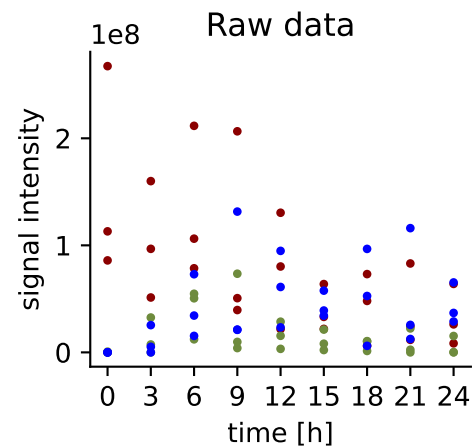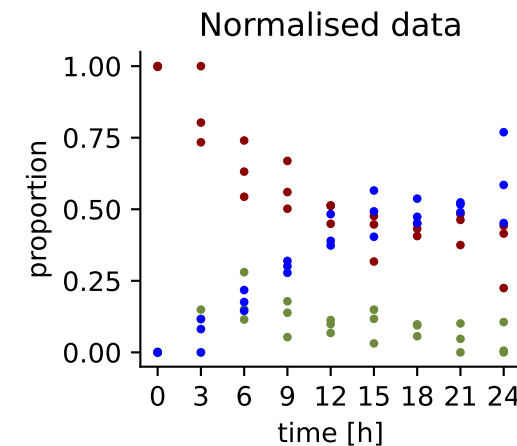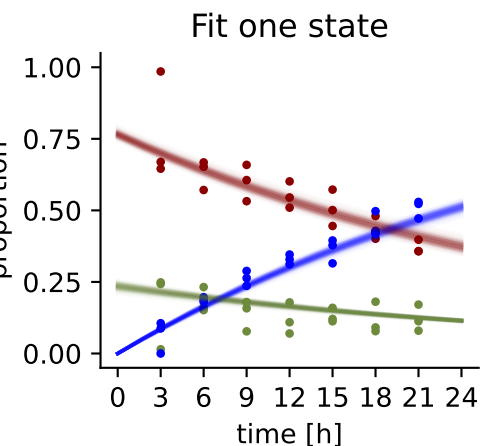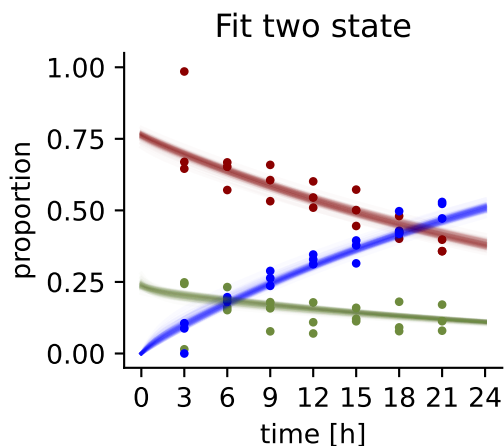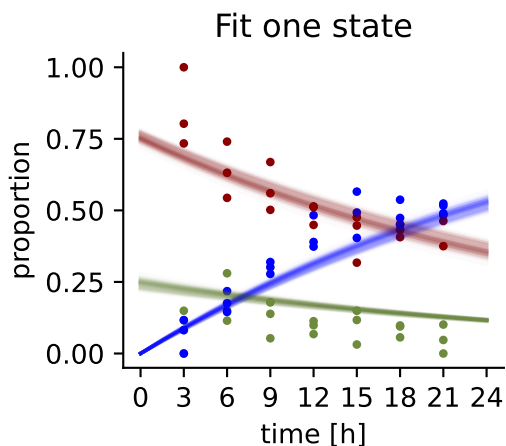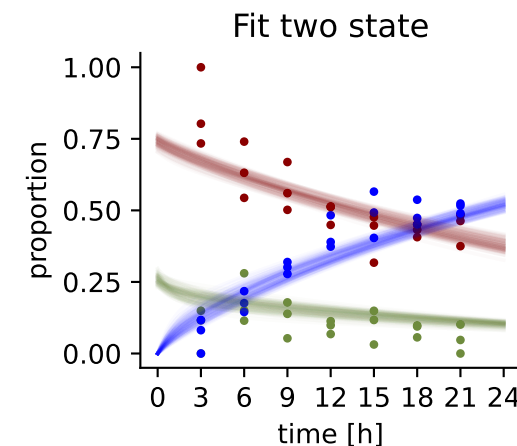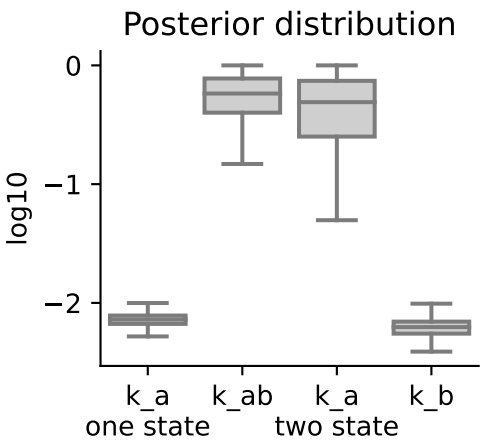

|                          |          |
|--------------------------|----------|
| p value                  | 3.28E-01 |
| log likelihood one state | 86.042   |
| log likelihood two state | 87.156   |
| rmse one state           | 0.349    |
| rmse two state           | 0.333    |
| k_a one state            | 0.007    |
| k_ab                     | 0.579    |
| k_a two state            | 0.49     |
| k_b                      | 0.006    |
| sigma one state          | 0.063    |
| sigma two state          | 0.062    |

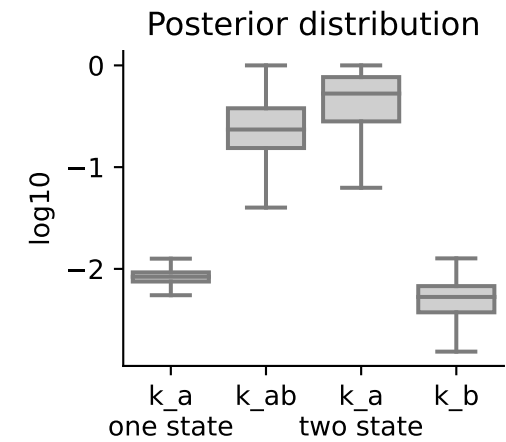

|                          |          |
|--------------------------|----------|
| p value                  | 3.43E-03 |
| log likelihood one state | 63.111   |
| log likelihood two state | 68.787   |
| rmse one state           | 0.399    |
| rmse two state           | 0.364    |
| k_a one state            | 0.008    |
| k_ab                     | 0.234    |
| k_a two state            | 0.528    |
| k_b                      | 0.005    |
| sigma one state          | 0.09     |
| sigma two state          | 0.086    |

mL49  
MRPL49  
Q13405  
39S ribosomal protein L49, mitochondrial

Cell lysate

Mitochondria

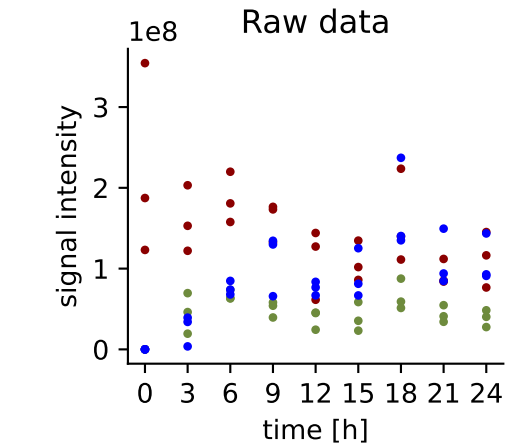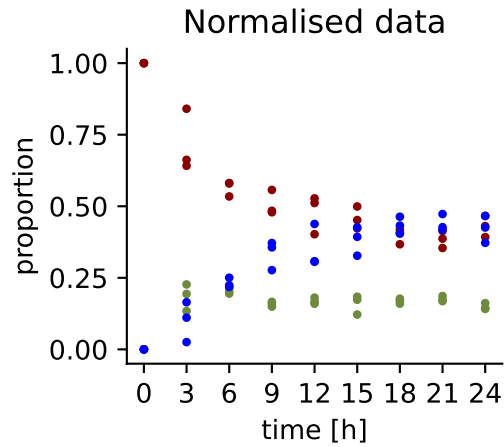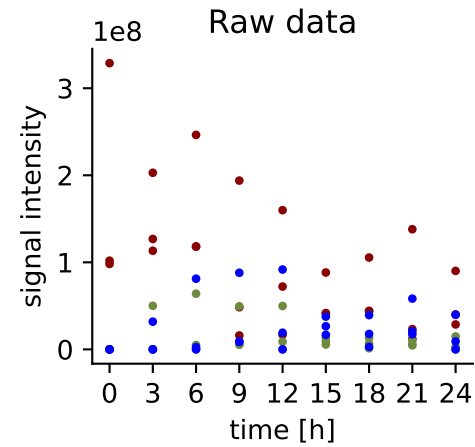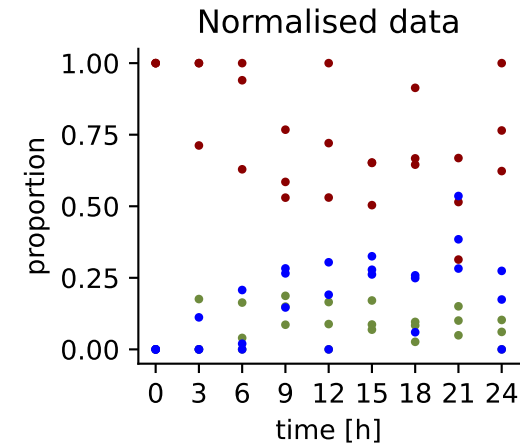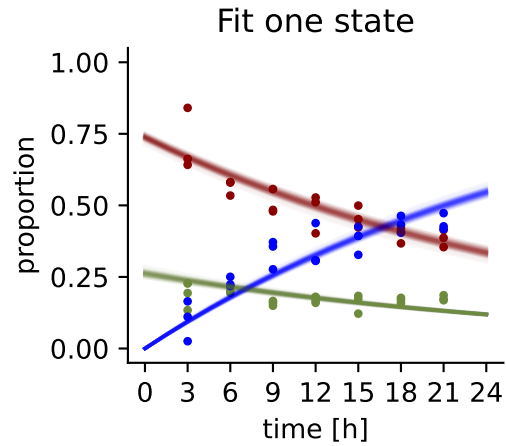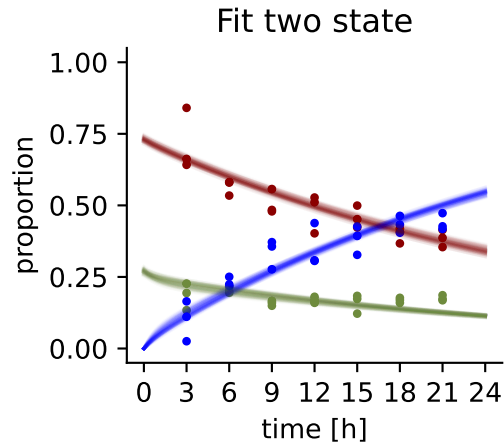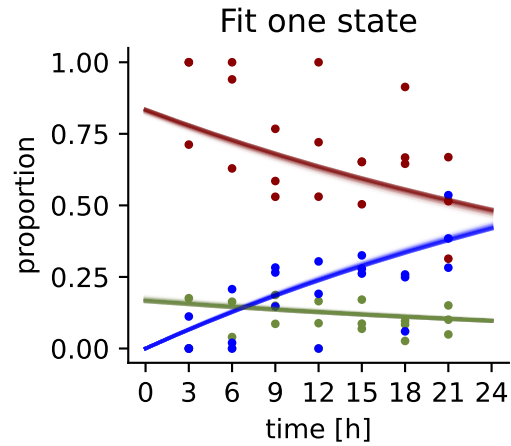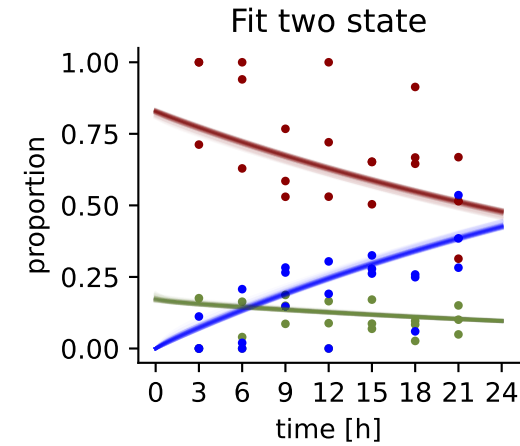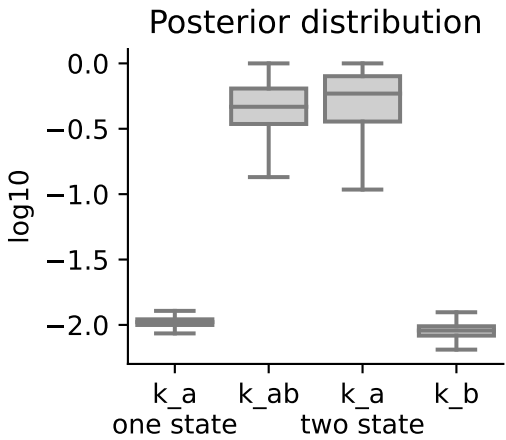

|                          |          |
|--------------------------|----------|
| p value                  | 5.29E-02 |
| log likelihood one state | 97.46    |
| log likelihood two state | 100.398  |
| rmse one state           | 0.336    |
| rmse two state           | 0.305    |
| k_a one state            | 0.011    |
| k_ab                     | 0.466    |
| k_a two state            | 0.588    |
| k_b                      | 0.009    |
| sigma one state          | 0.052    |
| sigma two state          | 0.051    |

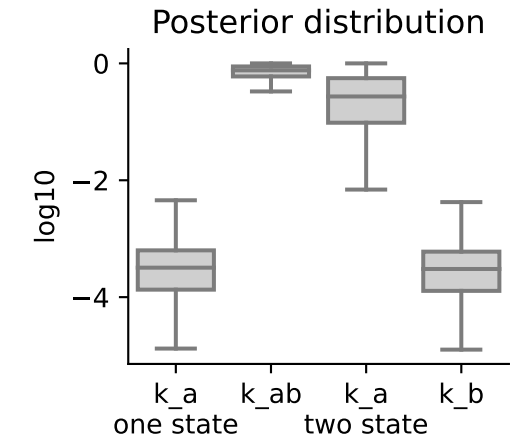

|                          |          |
|--------------------------|----------|
| p value                  | 1.00E+00 |
| log likelihood one state | 40.669   |
| log likelihood two state | 40.636   |
| rmse one state           | 0.296    |
| rmse two state           | 0.296    |
| k_a one state            | 0.0      |
| k_ab                     | 0.76     |
| k_a two state            | 0.272    |
| k_b                      | 0.0      |
| sigma one state          | 0.129    |
| sigma two state          | 0.13     |

mL50  
MRPL50  
Q8N5N7  
39S ribosomal protein L50, mitochondrial

Cell lysate

Mitochondria

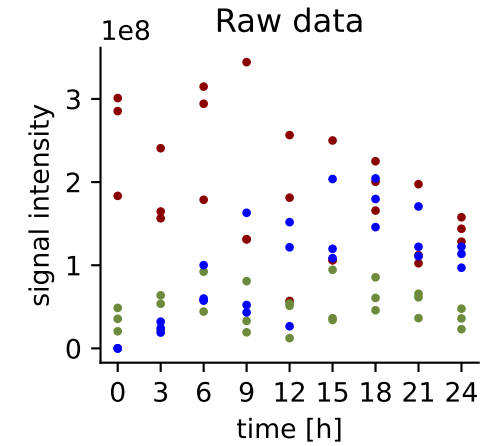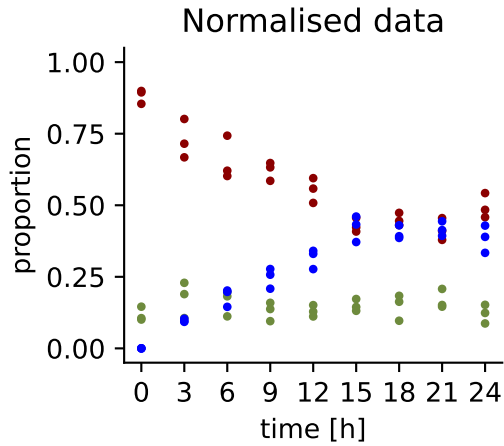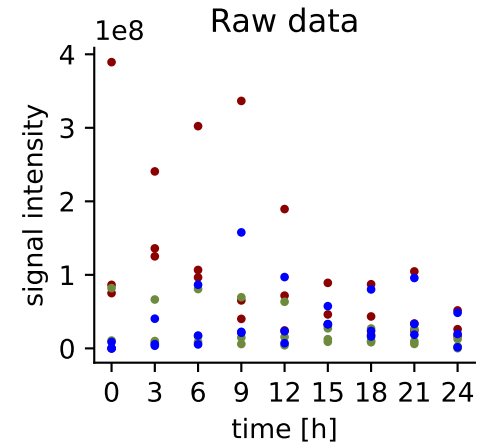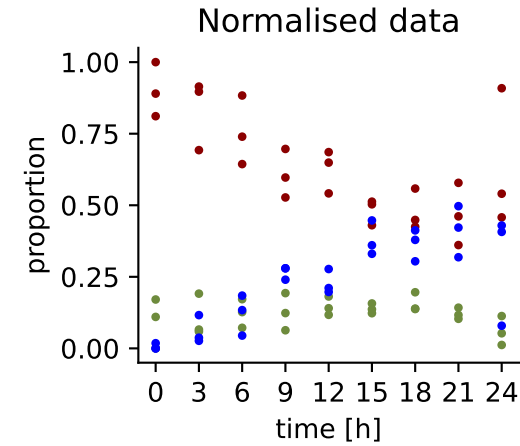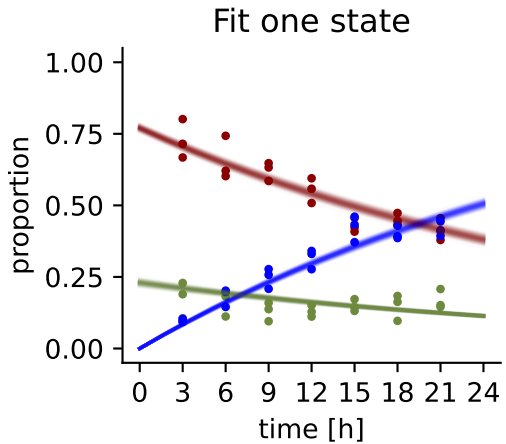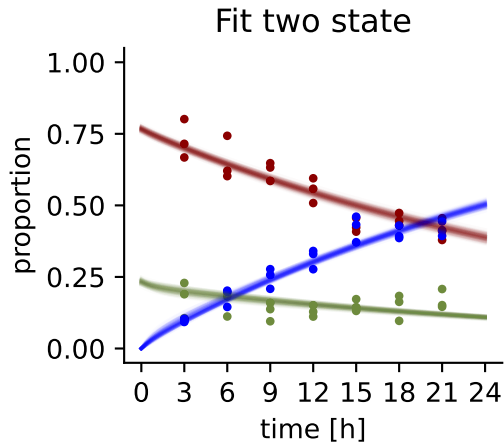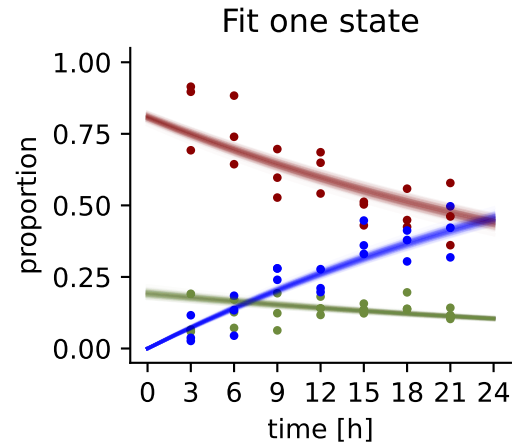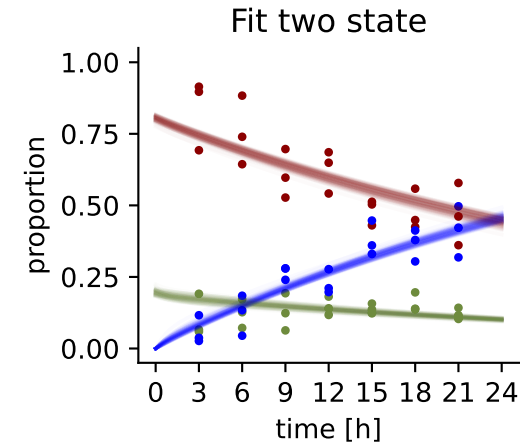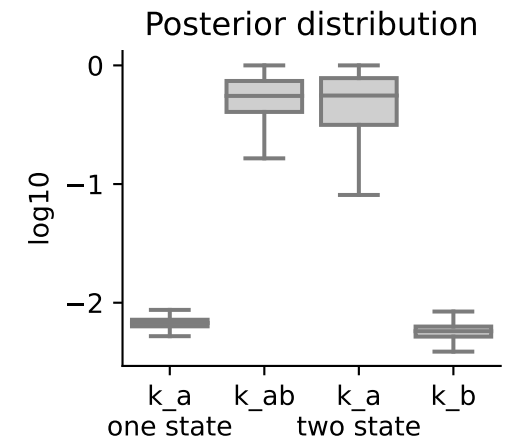

|                          |          |
|--------------------------|----------|
| p value                  | 1.48E-01 |
| log likelihood one state | 105.281  |
| log likelihood two state | 107.19   |
| rmse one state           | 0.322    |
| rmse two state           | 0.3      |
| k_a one state            | 0.007    |
| k_ab                     | 0.553    |
| k_a two state            | 0.557    |
| k_b                      | 0.006    |
| sigma one state          | 0.046    |
| sigma two state          | 0.045    |

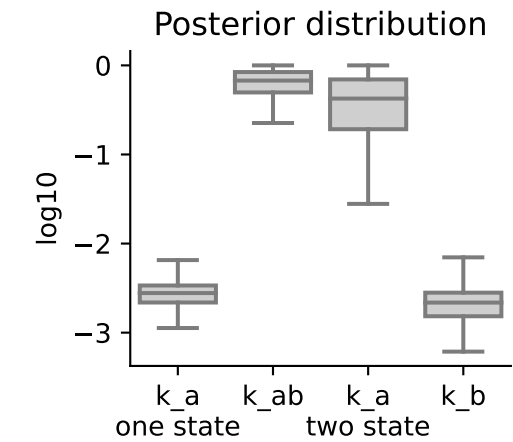

|                          |          |
|--------------------------|----------|
| p value                  | 9.80E-01 |
| log likelihood one state | 77.265   |
| log likelihood two state | 77.284   |
| rmse one state           | 0.319    |
| rmse two state           | 0.315    |
| k_a one state            | 0.003    |
| k_ab                     | 0.675    |
| k_a two state            | 0.424    |
| k_b                      | 0.002    |
| sigma one state          | 0.072    |
| sigma two state          | 0.072    |

mL51  
MRPL51  
Q4U2R6  
39S ribosomal protein L51, mitochondrial

Cell lysate

Mitochondria

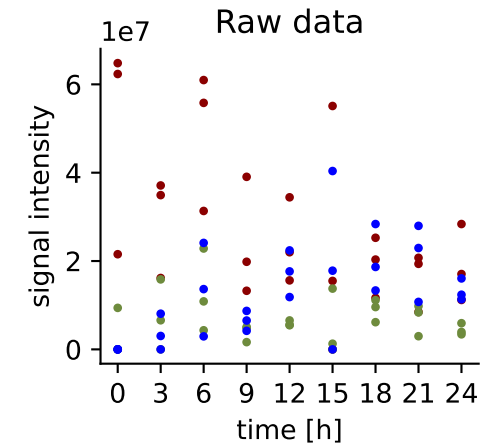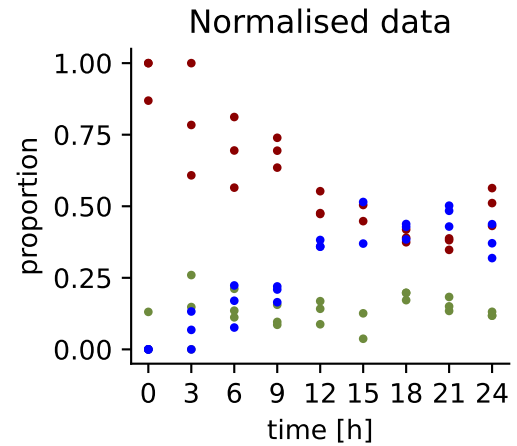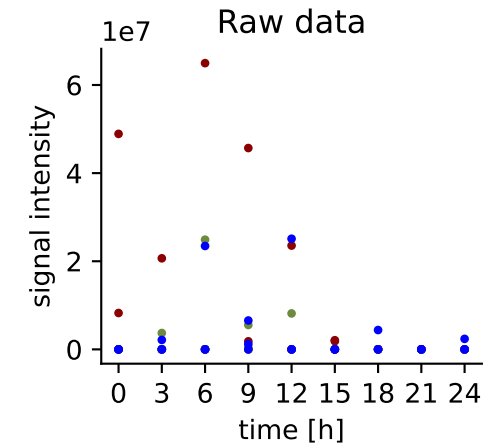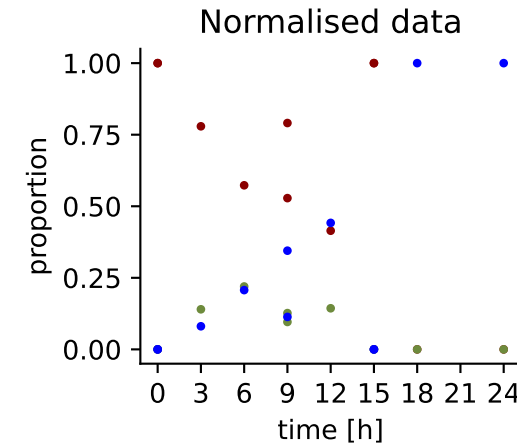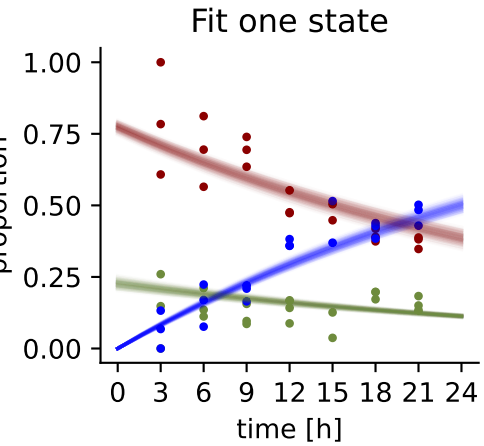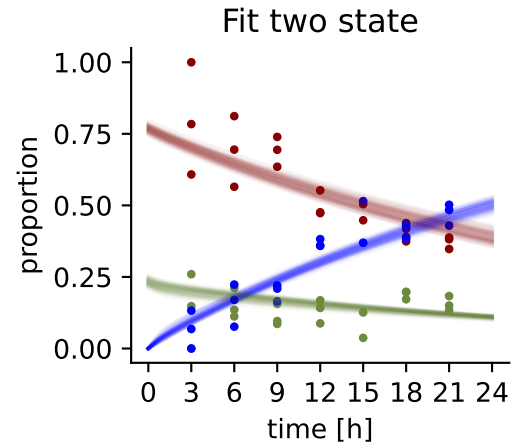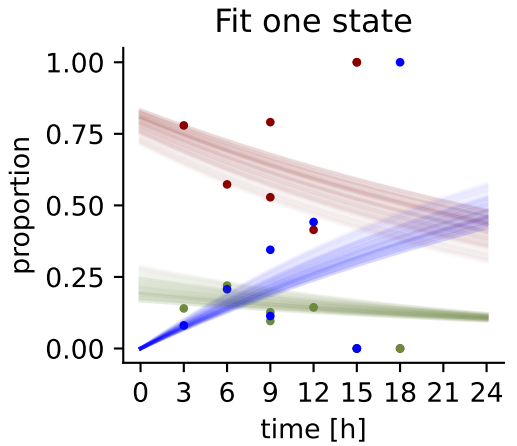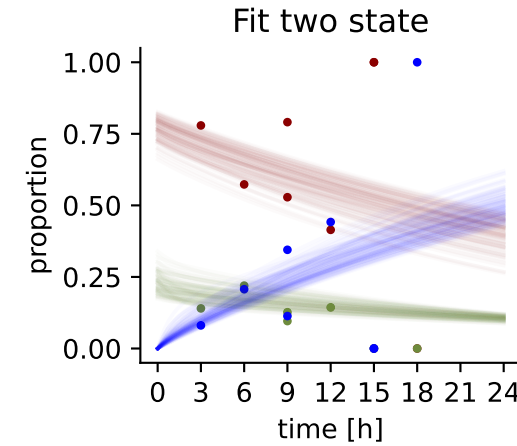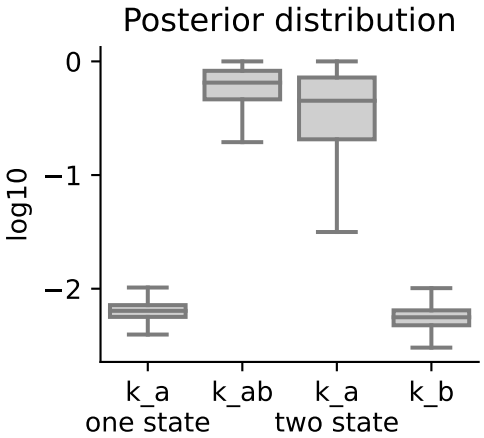

|                          |          |
|--------------------------|----------|
| p value                  | 9.10E-01 |
| log likelihood one state | 66.589   |
| log likelihood two state | 66.683   |
| rmse one state           | 0.358    |
| rmse two state           | 0.35     |
| k_a one state            | 0.006    |
| k_ab                     | 0.65     |
| k_a two state            | 0.451    |
| k_b                      | 0.006    |
| sigma one state          | 0.081    |
| sigma two state          | 0.081    |

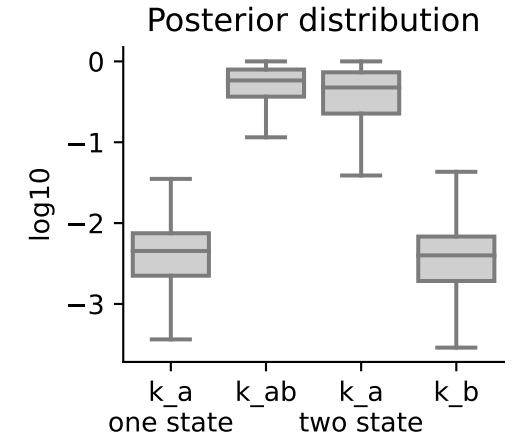

|                          |          |
|--------------------------|----------|
| p value                  | 8.76E-01 |
| log likelihood one state | -0.538   |
| log likelihood two state | -0.405   |
| rmse one state           | 0.512    |
| rmse two state           | 0.496    |
| k_a one state            | 0.005    |
| k_ab                     | 0.581    |
| k_a two state            | 0.476    |
| k_b                      | 0.004    |
| sigma one state          | 0.232    |
| sigma two state          | 0.232    |

mL52  
MRPL52  
Q86TS9  
39S ribosomal protein L52, mitochondrial

Cell lysate

Mitochondria

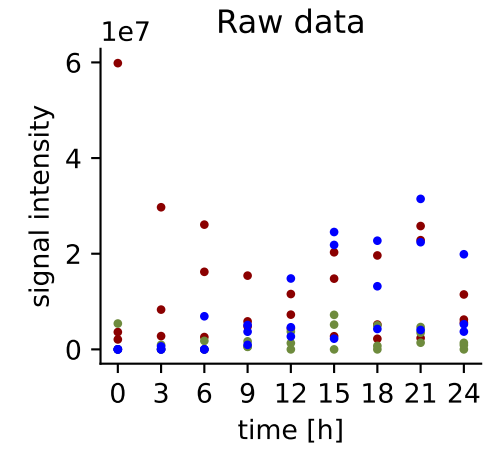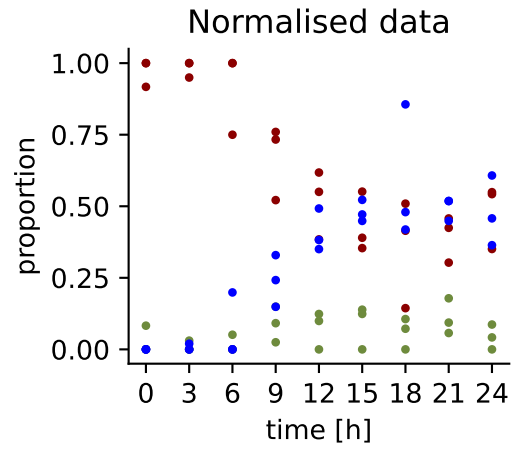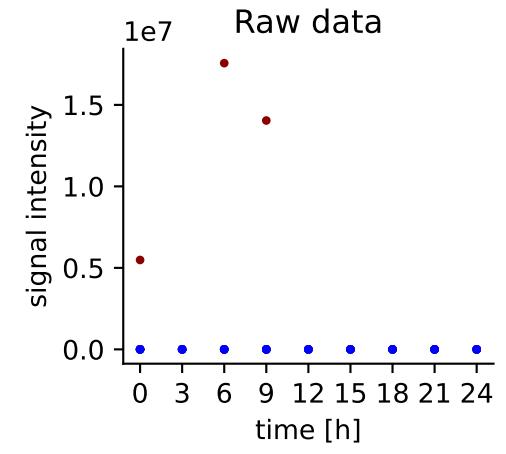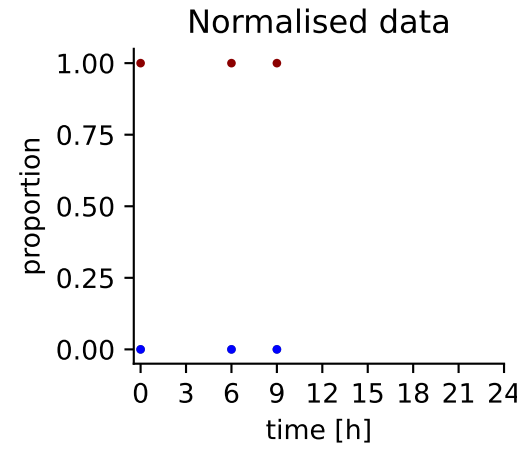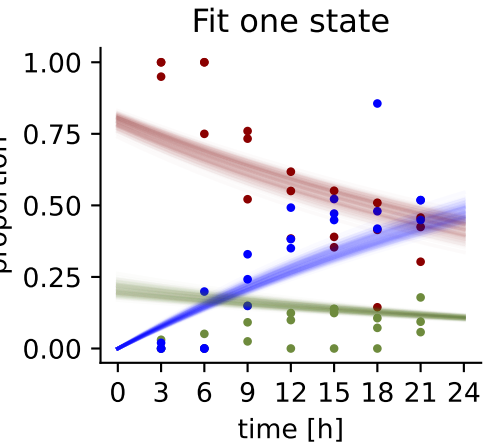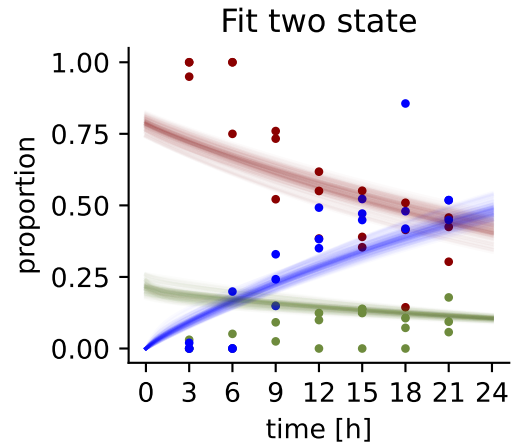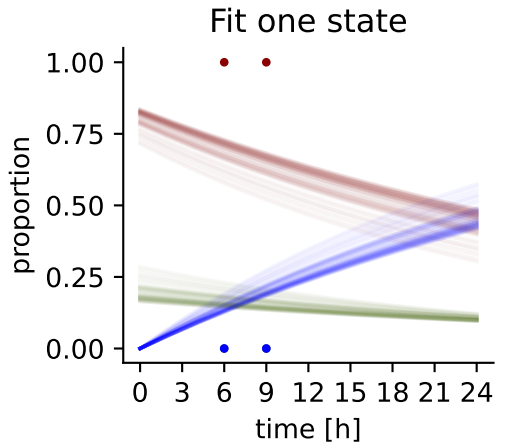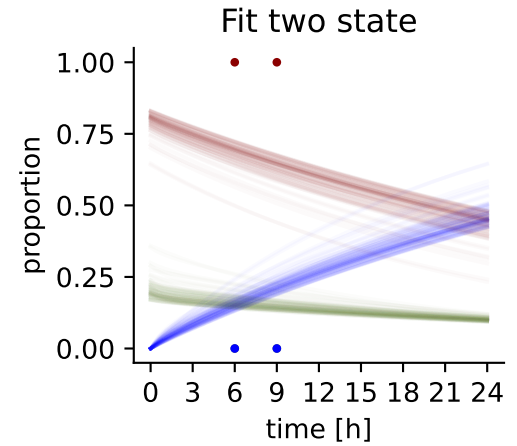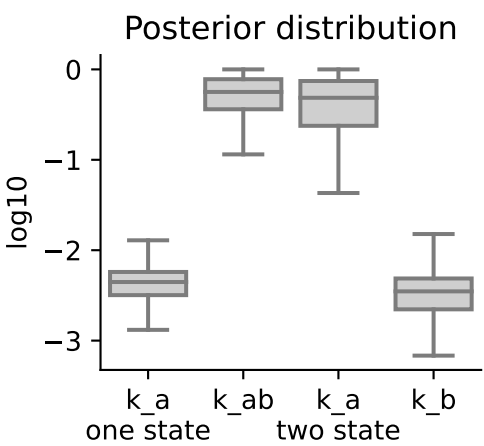

|                          |          |
|--------------------------|----------|
| p value                  | 6.55E-01 |
| log likelihood one state | 30.016   |
| log likelihood two state | 30.439   |
| rmse one state           | 0.462    |
| rmse two state           | 0.444    |
| k_a one state            | 0.004    |
| k_ab                     | 0.563    |
| k_a two state            | 0.485    |
| k_b                      | 0.004    |
| sigma one state          | 0.15     |
| sigma two state          | 0.15     |

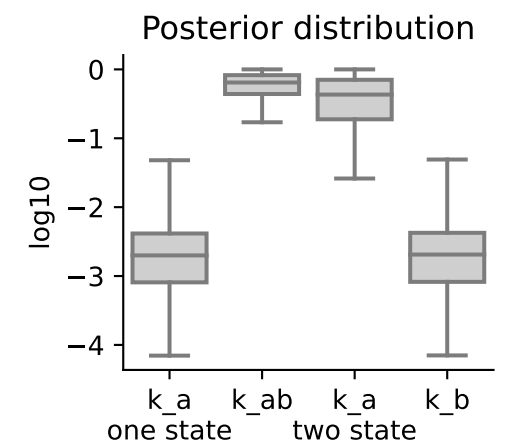

|                          |          |
|--------------------------|----------|
| p value                  | 1.00E+00 |
| log likelihood one state | 0.885    |
| log likelihood two state | 0.874    |
| rmse one state           | 0.275    |
| rmse two state           | 0.275    |
| k_a one state            | 0.002    |
| k_ab                     | 0.645    |
| k_a two state            | 0.431    |
| k_b                      | 0.002    |
| sigma one state          | 0.197    |
| sigma two state          | 0.202    |

mL53  
MRPL53  
Q96EL3  
39S ribosomal protein L53, mitochondrial

Cell lysate

Mitochondria

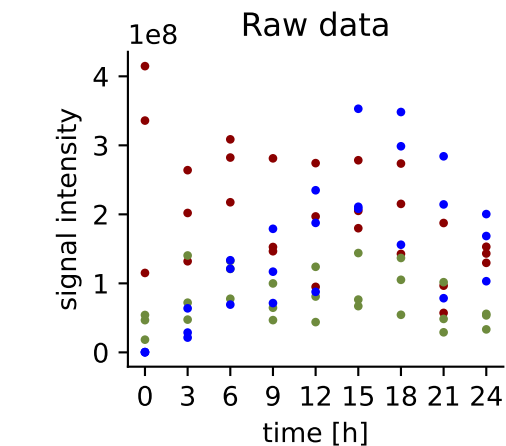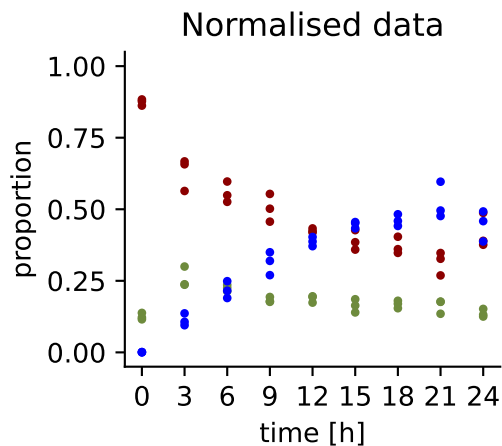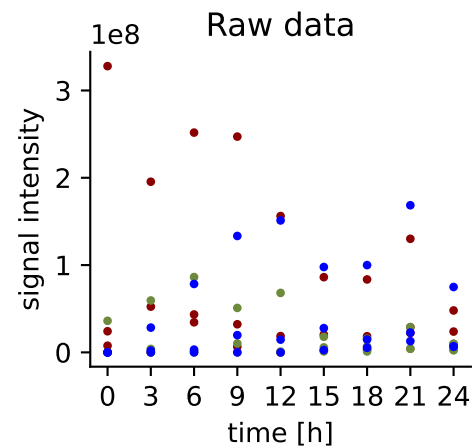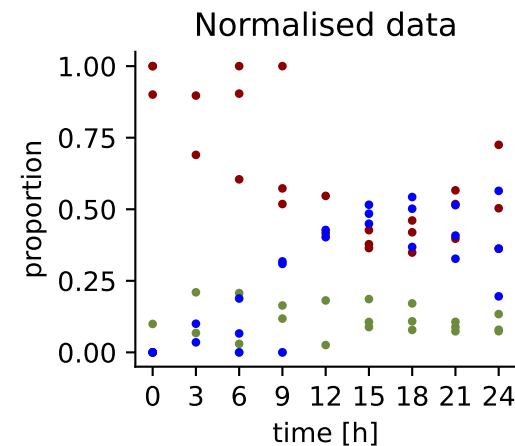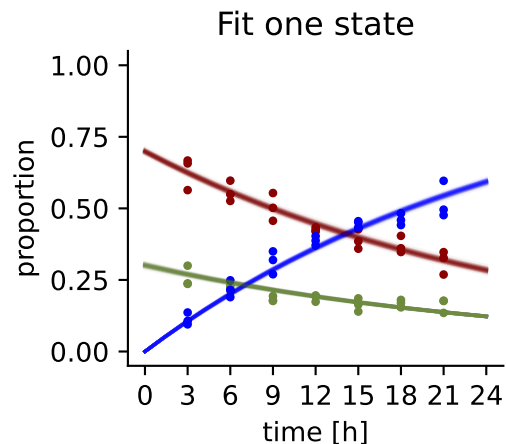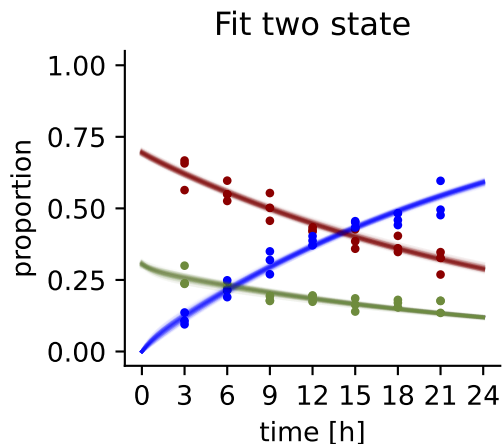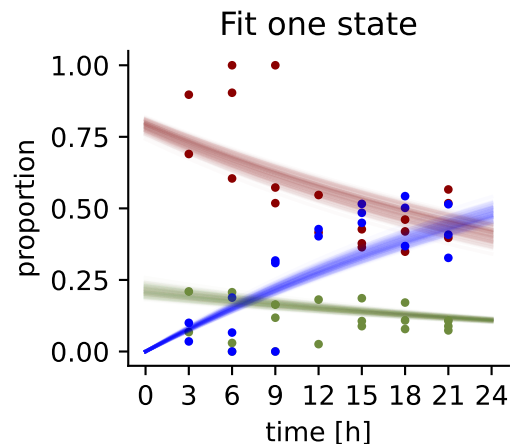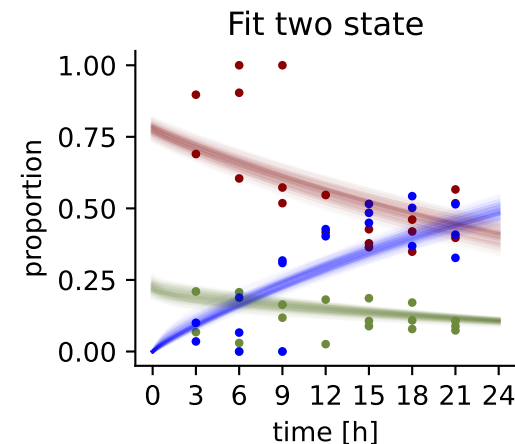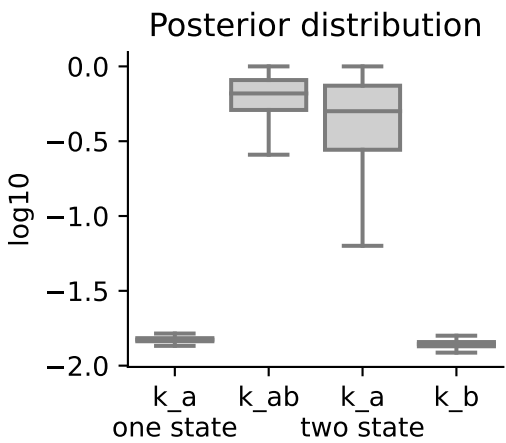

|                          |          |
|--------------------------|----------|
| p value                  | 1.06E-01 |
| log likelihood one state | 128.449  |
| log likelihood two state | 130.694  |
| rmse one state           | 0.356    |
| rmse two state           | 0.341    |
| $k_a$ one state          | 0.015    |
| $k_{ab}$                 | 0.659    |
| $k_a$ two state          | 0.502    |
| $k_b$                    | 0.014    |
| sigma one state          | 0.032    |
| sigma two state          | 0.031    |

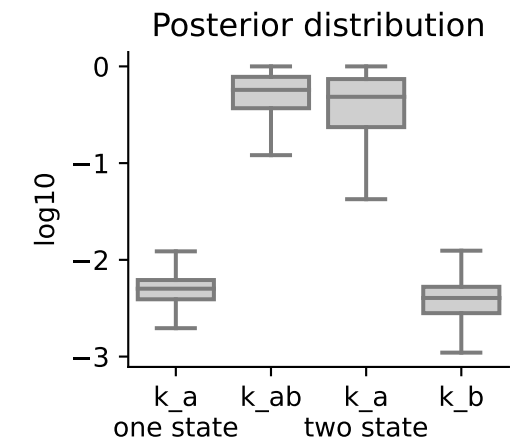

|                          |          |
|--------------------------|----------|
| p value                  | 5.96E-01 |
| log likelihood one state | 38.23    |
| log likelihood two state | 38.747   |
| rmse one state           | 0.408    |
| rmse two state           | 0.4      |
| $k_a$ one state          | 0.005    |
| $k_{ab}$                 | 0.572    |
| $k_a$ two state          | 0.485    |
| $k_b$                    | 0.004    |
| sigma one state          | 0.125    |
| sigma two state          | 0.124    |

mL54  
MRPL54  
Q6P161  
39S ribosomal protein L54, mitochondrial

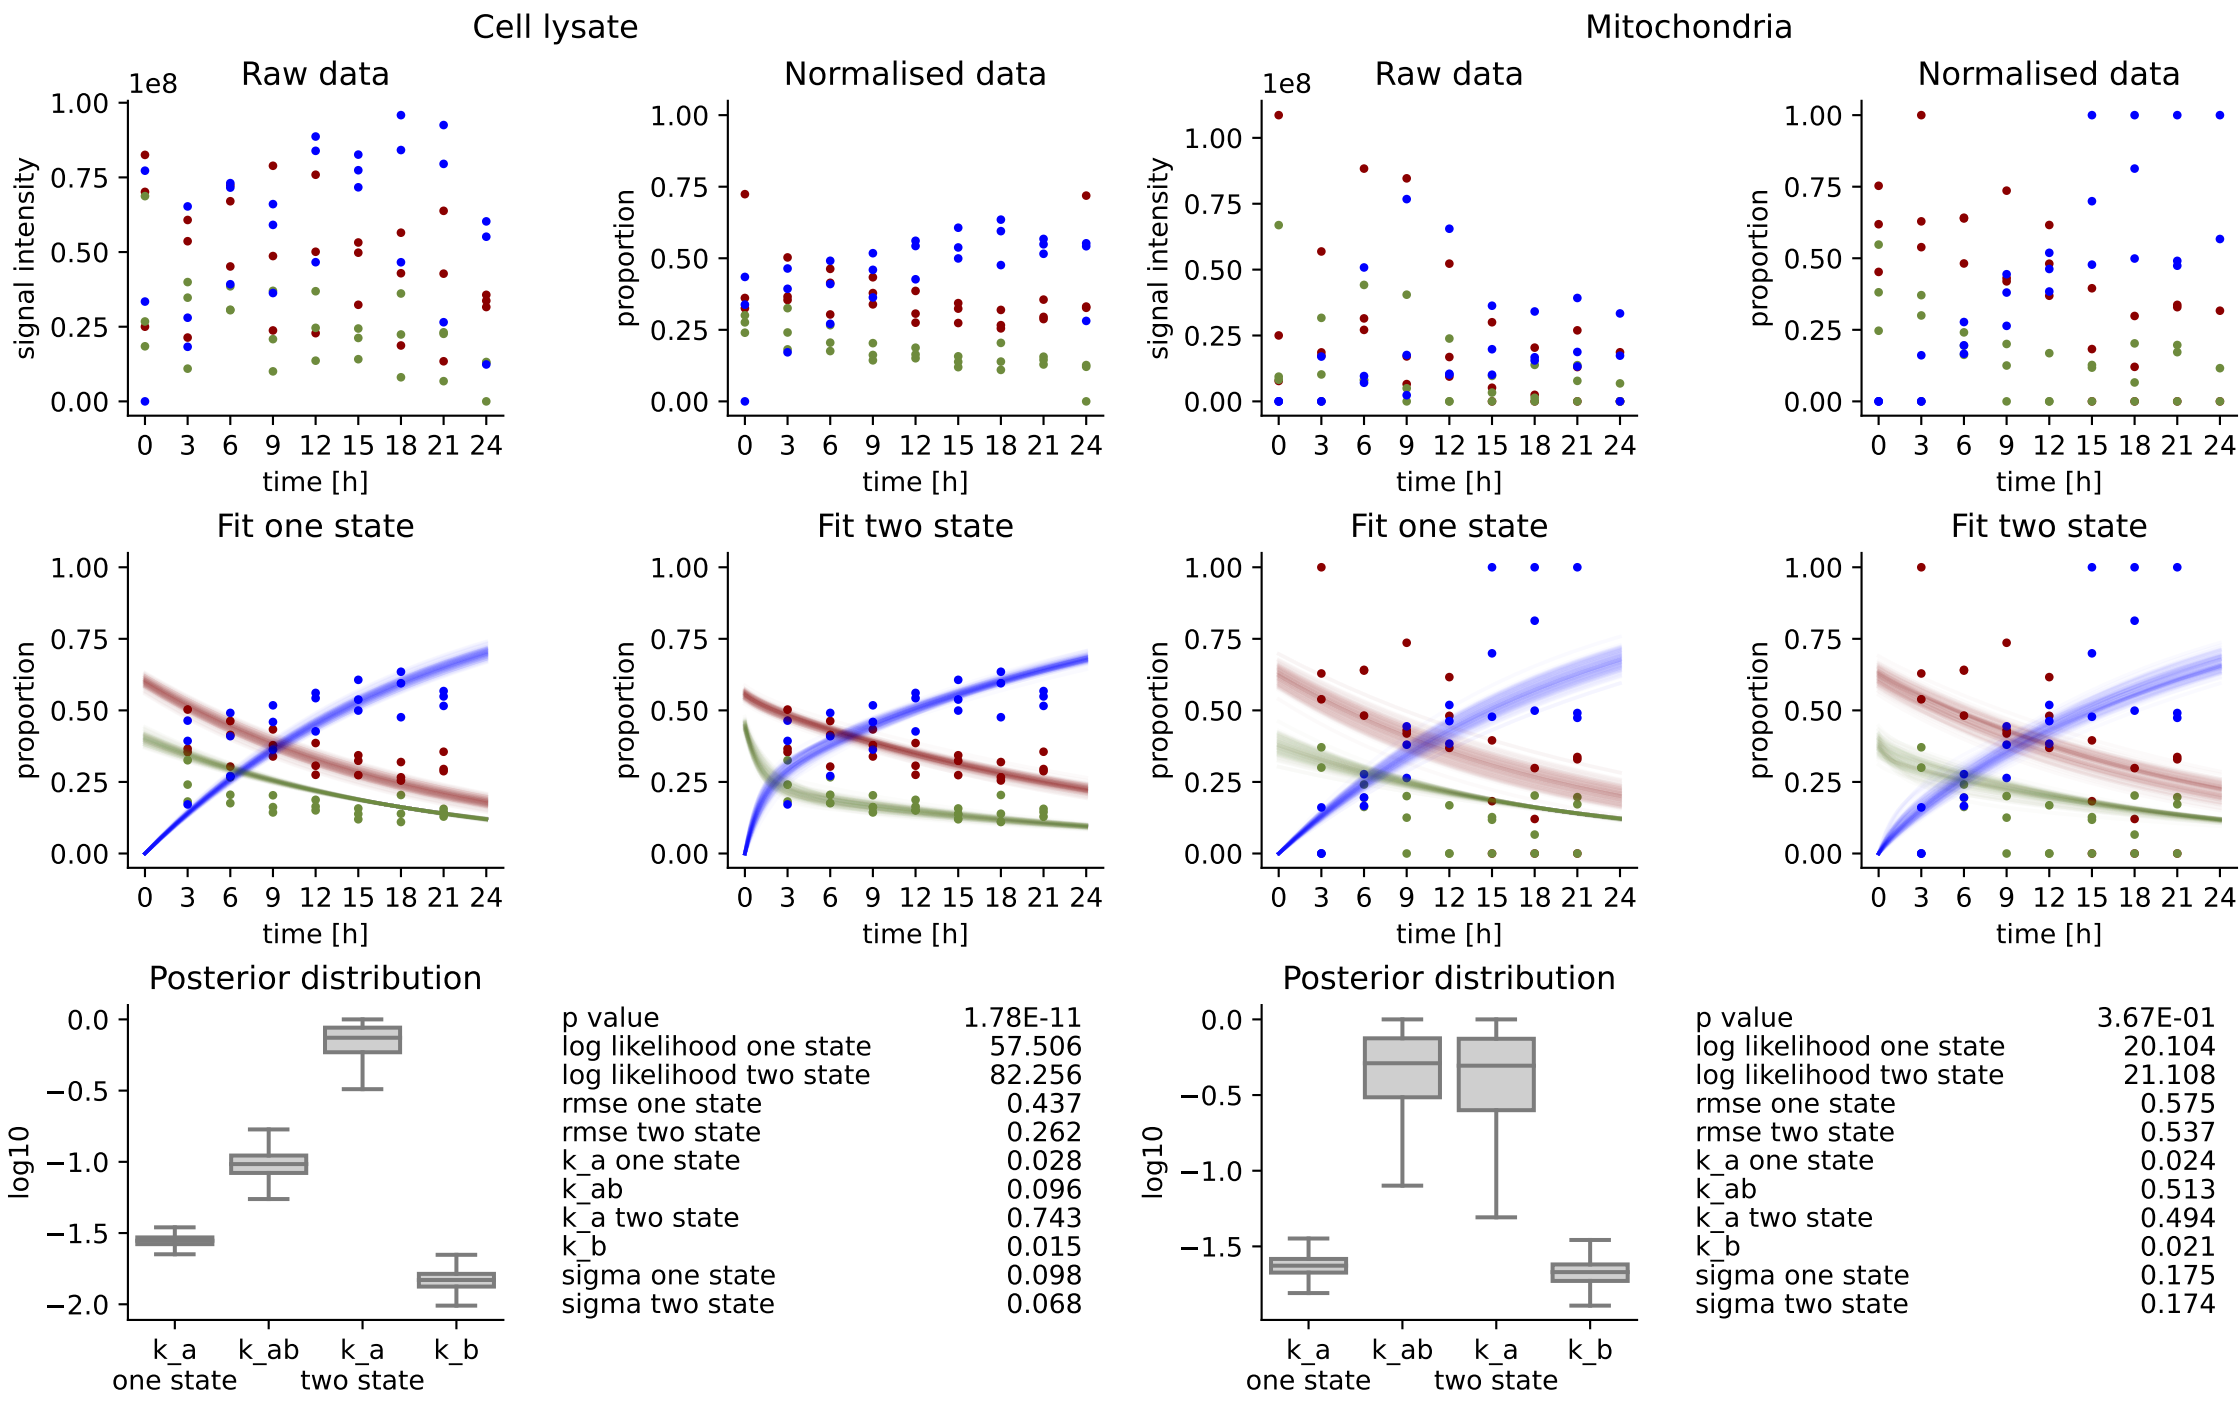



mL62  
ICT1  
Q14197  
Peptidyl-tRNA hydrolase ICT1, mitochondrial

Cell lysate

Mitochondria

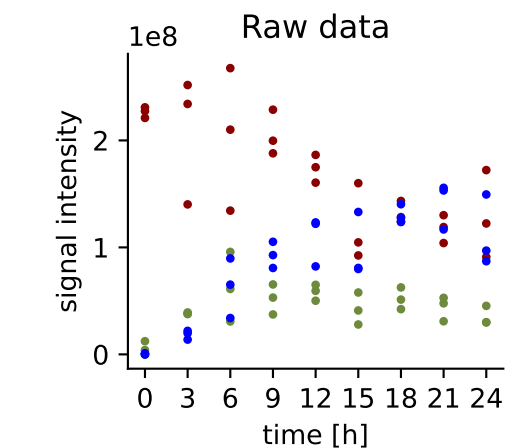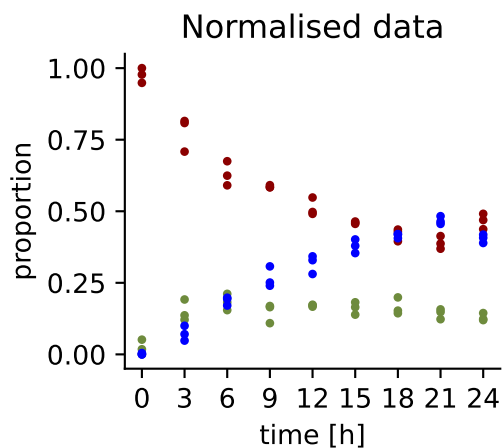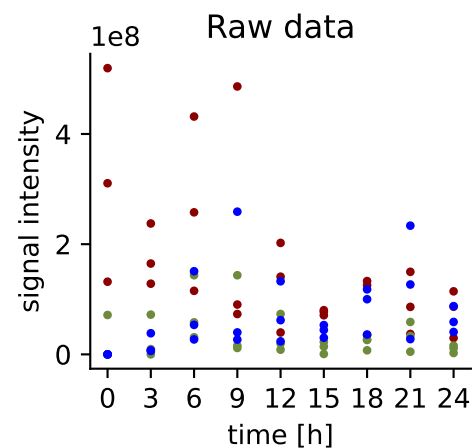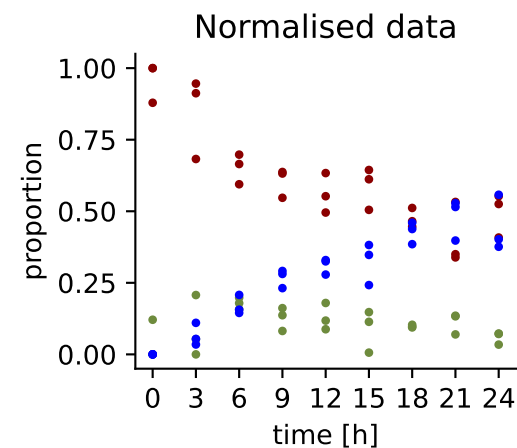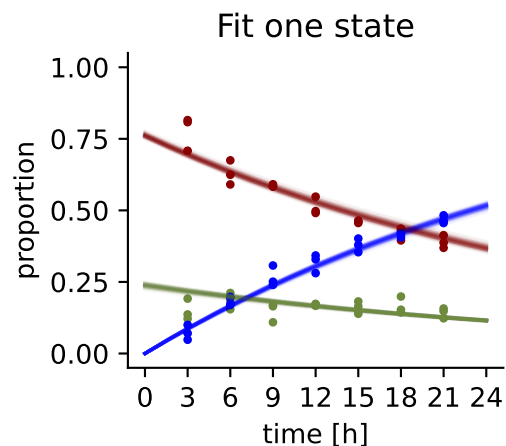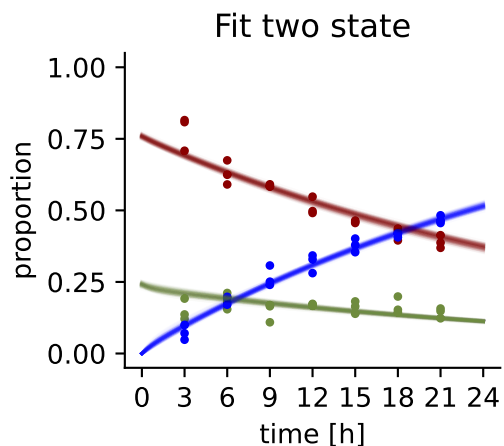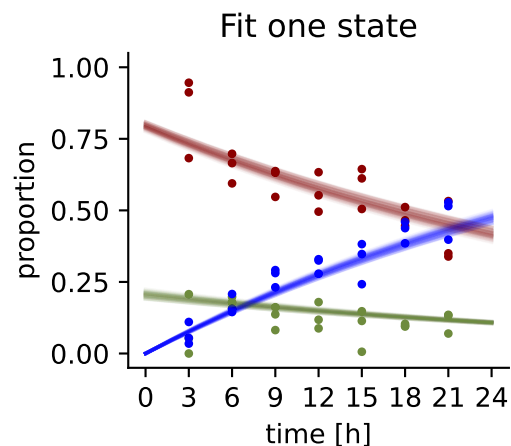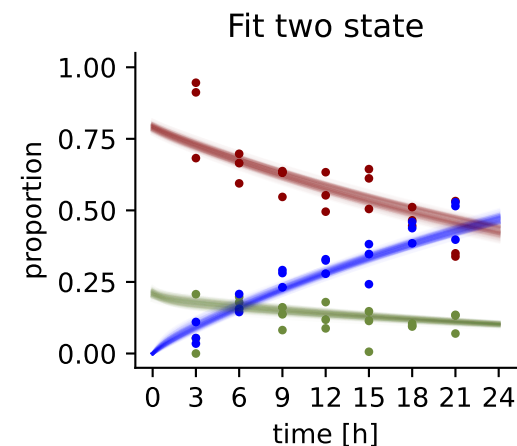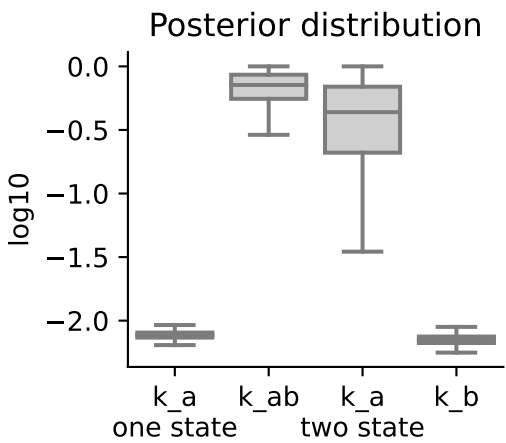

|                          |          |
|--------------------------|----------|
| p value                  | 6.00E-01 |
| log likelihood one state | 118.914  |
| log likelihood two state | 119.425  |
| rmse one state           | 0.328    |
| rmse two state           | 0.318    |
| k_a one state            | 0.008    |
| k_ab                     | 0.714    |
| k_a two state            | 0.437    |
| k_b                      | 0.007    |
| sigma one state          | 0.037    |
| sigma two state          | 0.037    |

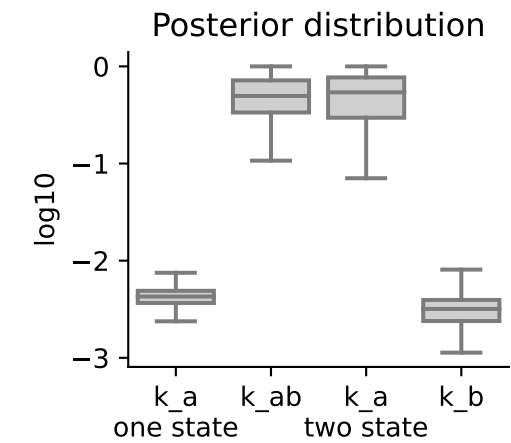

|                          |          |
|--------------------------|----------|
| p value                  | 2.28E-01 |
| log likelihood one state | 78.025   |
| log likelihood two state | 79.503   |
| rmse one state           | 0.34     |
| rmse two state           | 0.313    |
| k_a one state            | 0.004    |
| k_ab                     | 0.496    |
| k_a two state            | 0.541    |
| k_b                      | 0.003    |
| sigma one state          | 0.071    |
| sigma two state          | 0.07     |

mL63  
MRPL57  
Q9BQC6  
Ribosomal protein 63, mitochondrial

Cell lysate

Mitochondria

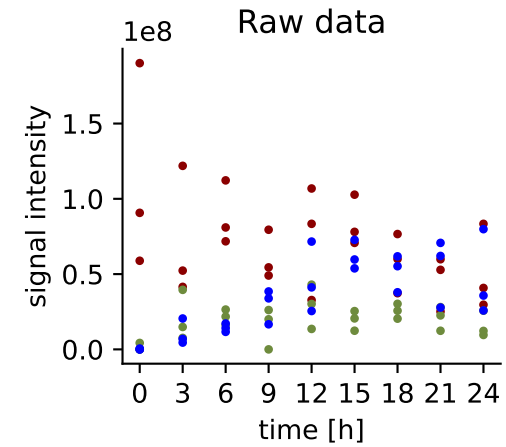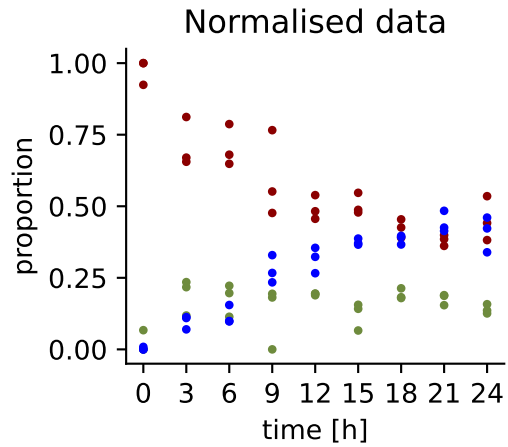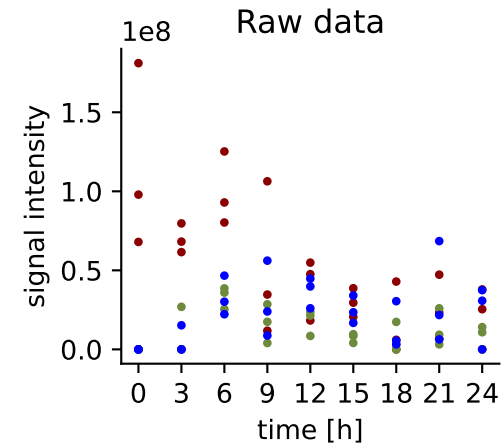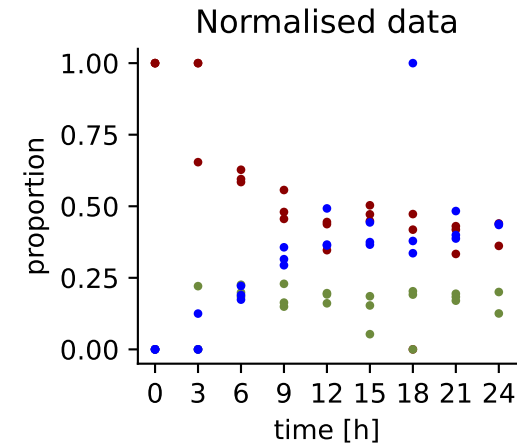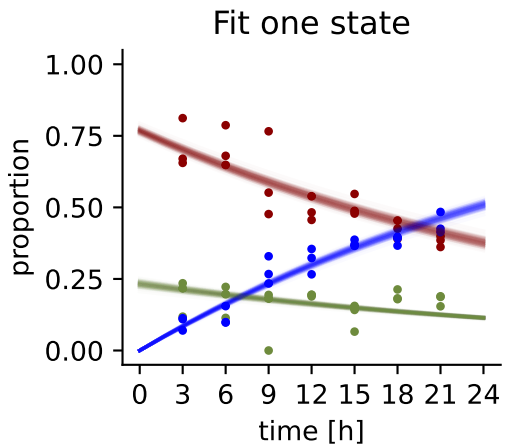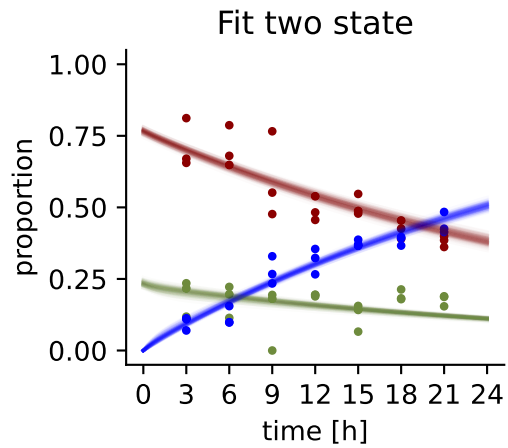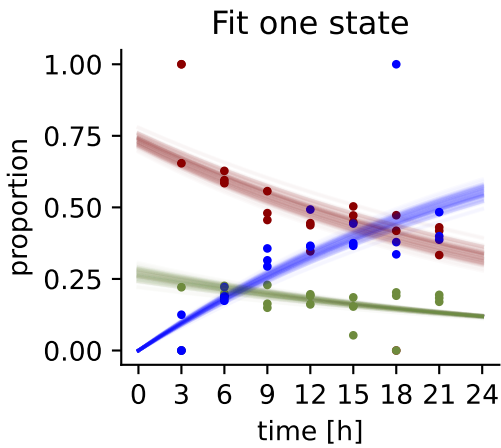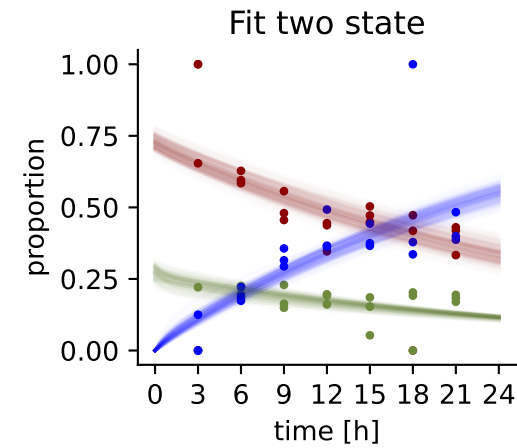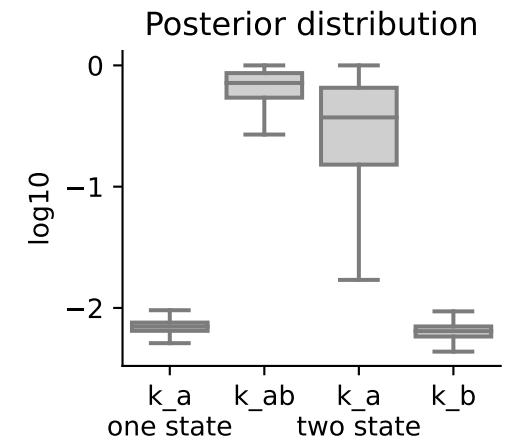

|                          |          |
|--------------------------|----------|
| p value                  | 7.98E-01 |
| log likelihood one state | 89.708   |
| log likelihood two state | 89.934   |
| rmse one state           | 0.324    |
| rmse two state           | 0.325    |
| k_a one state            | 0.007    |
| k_ab                     | 0.716    |
| k_a two state            | 0.373    |
| k_b                      | 0.006    |
| sigma one state          | 0.059    |
| sigma two state          | 0.06     |

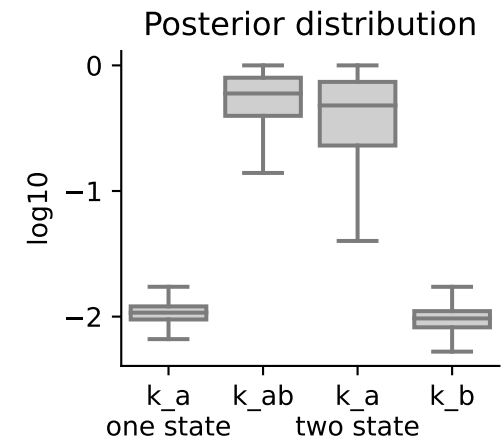

|                          |          |
|--------------------------|----------|
| p value                  | 8.32E-01 |
| log likelihood one state | 40.3     |
| log likelihood two state | 40.484   |
| rmse one state           | 0.422    |
| rmse two state           | 0.403    |
| k_a one state            | 0.011    |
| k_ab                     | 0.597    |
| k_a two state            | 0.48     |
| k_b                      | 0.01     |
| sigma one state          | 0.129    |
| sigma two state          | 0.129    |

mL64  
GADD45GIP1  
Q8TAE8

Growth arrest and DNA damage-inducible proteins-interacting protein 1

Cell lysate

Mitochondria

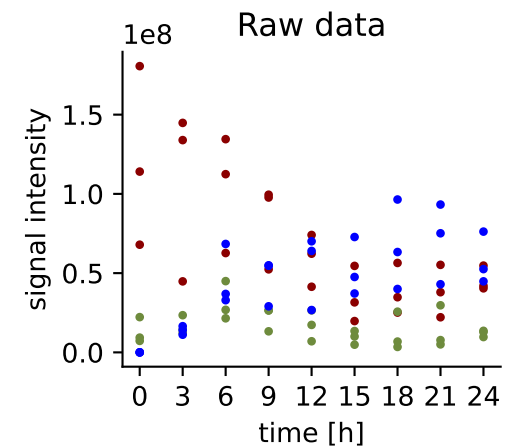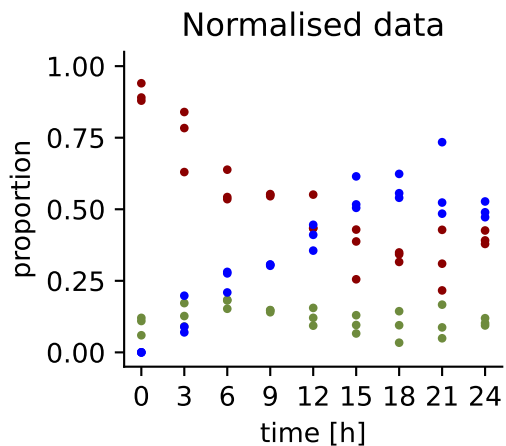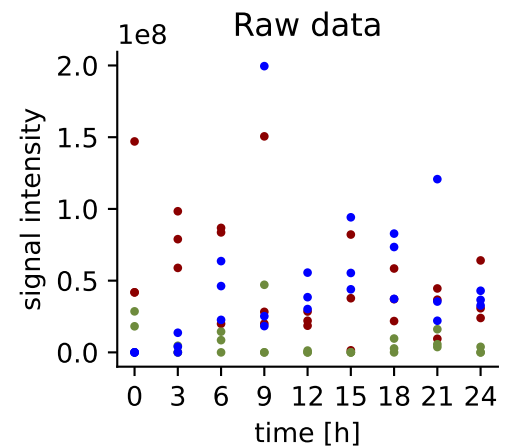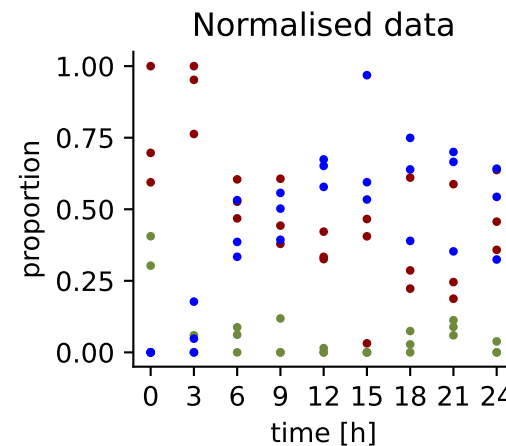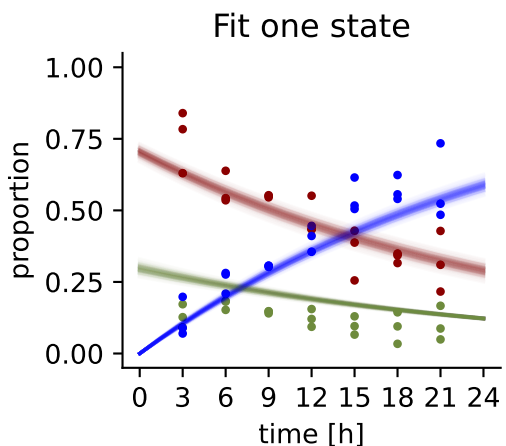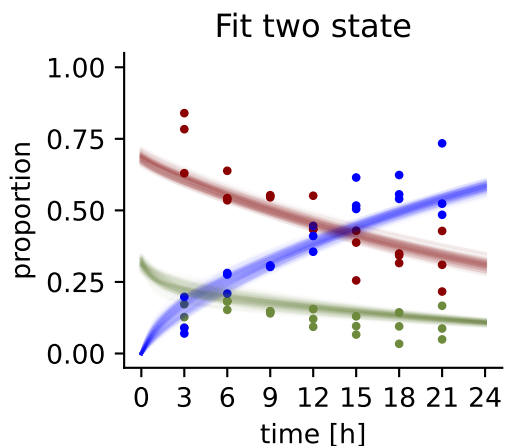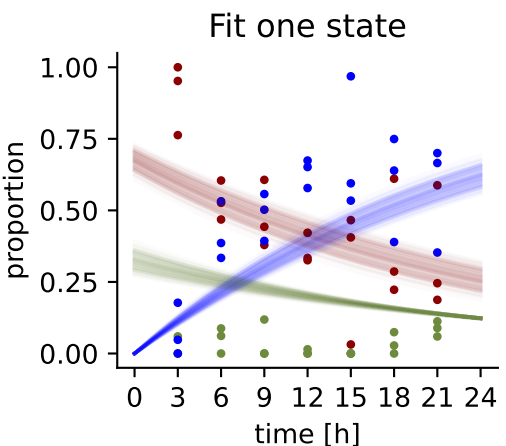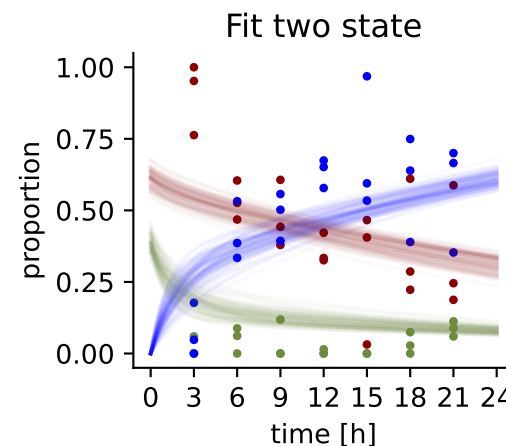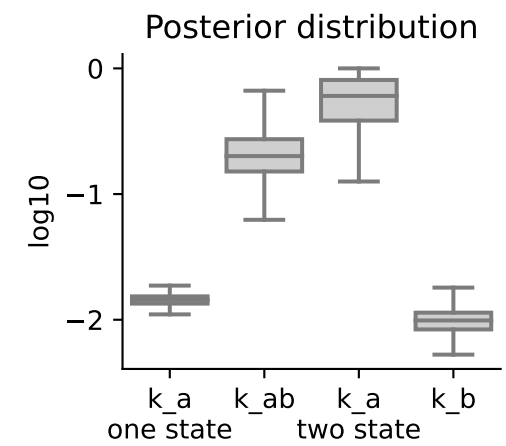

|                          |          |
|--------------------------|----------|
| p value                  | 1.34E-03 |
| log likelihood one state | 66.797   |
| log likelihood two state | 73.409   |
| rmse one state           | 0.432    |
| rmse two state           | 0.364    |
| k_a one state            | 0.014    |
| k_ab                     | 0.201    |
| k_a two state            | 0.604    |
| k_b                      | 0.01     |
| sigma one state          | 0.085    |
| sigma two state          | 0.078    |

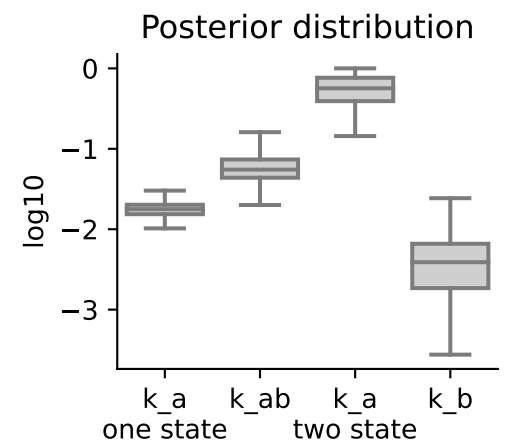

|                          |          |
|--------------------------|----------|
| p value                  | 1.12E-05 |
| log likelihood one state | 14.415   |
| log likelihood two state | 25.811   |
| rmse one state           | 0.58     |
| rmse two state           | 0.424    |
| k_a one state            | 0.018    |
| k_ab                     | 0.055    |
| k_a two state            | 0.566    |
| k_b                      | 0.004    |
| sigma one state          | 0.191    |
| sigma two state          | 0.165    |

mL65  
MRPS30  
Q9NP92  
28S ribosomal protein S30, mitochondrial

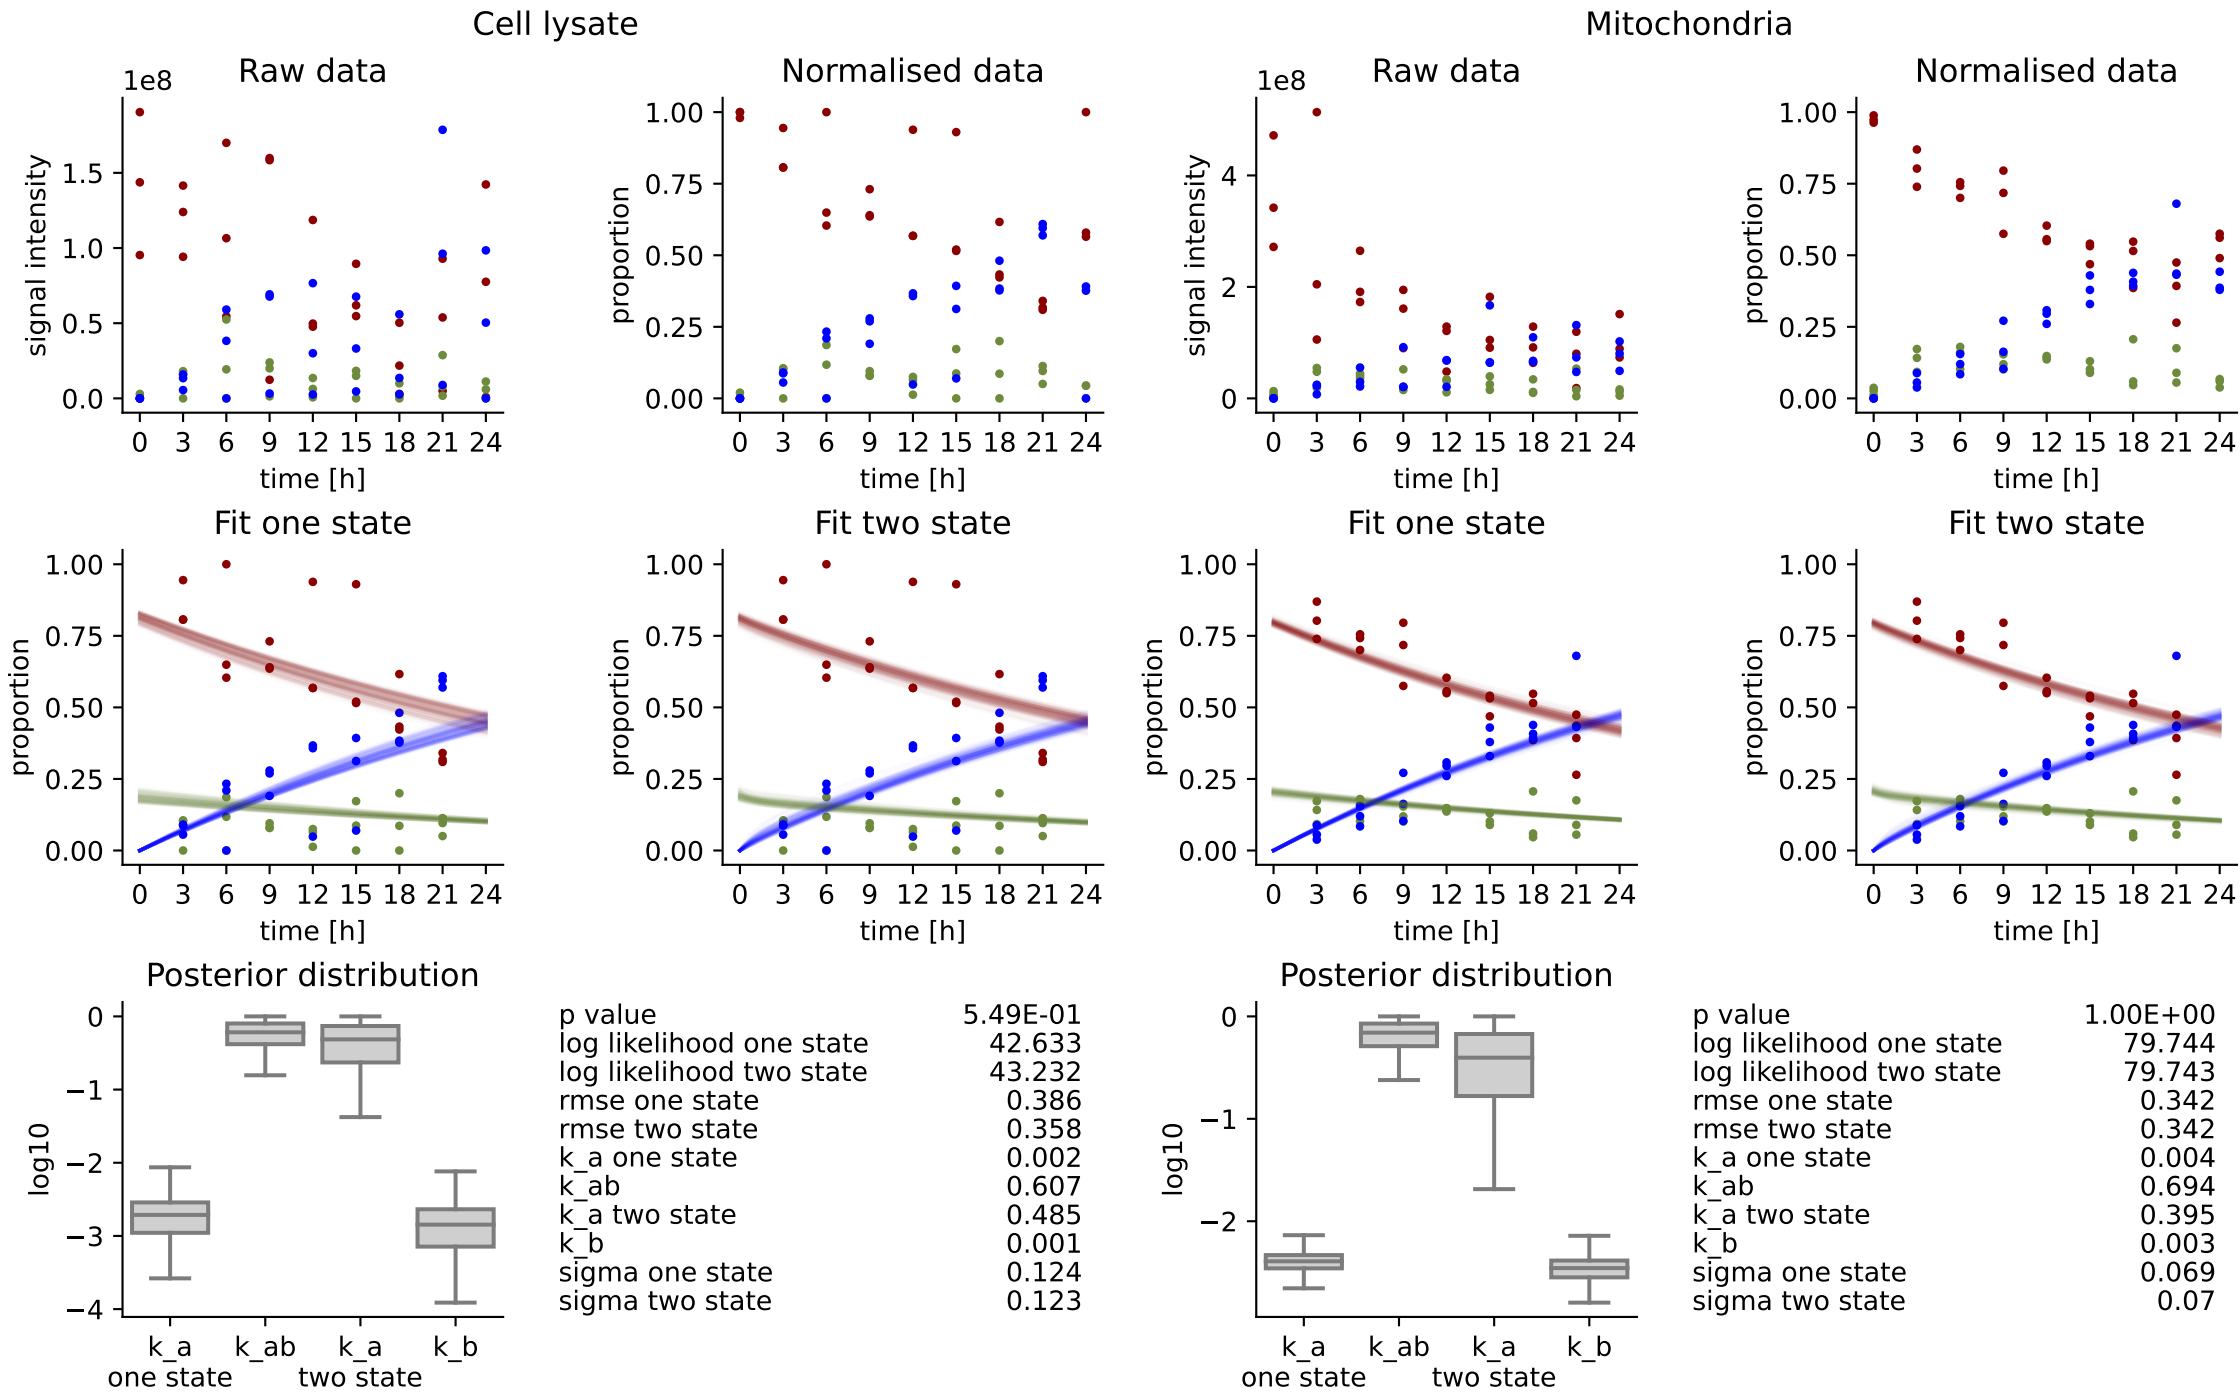

mL66  
MRPS18A  
Q9NVS2  
28S ribosomal protein S18a, mitochondrial

Cell lysate

Mitochondria

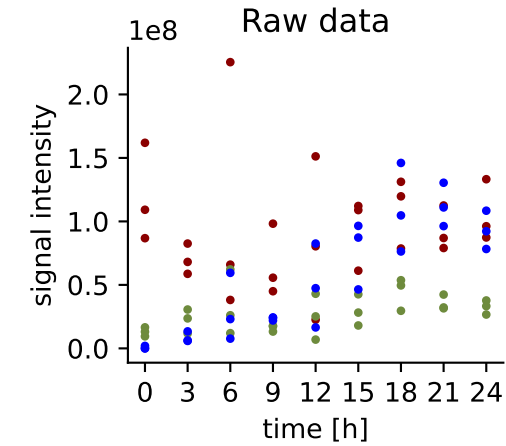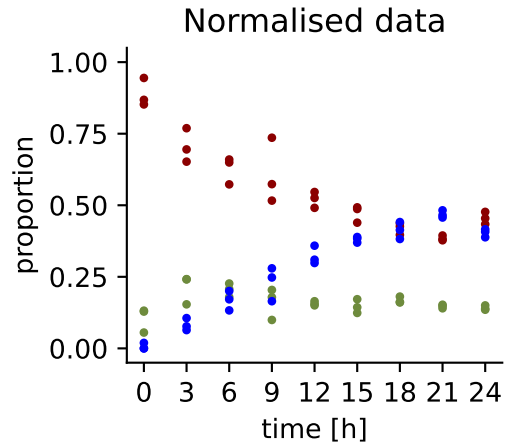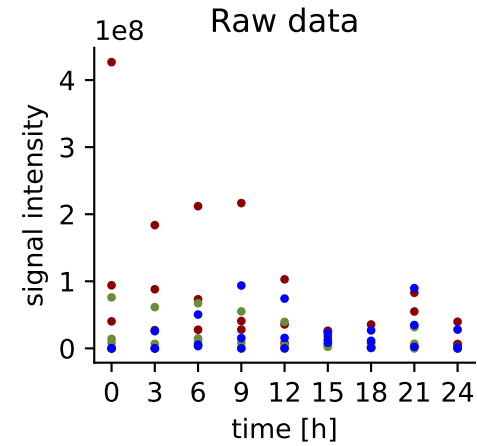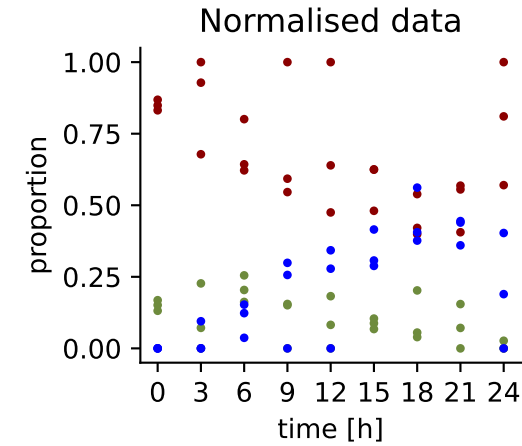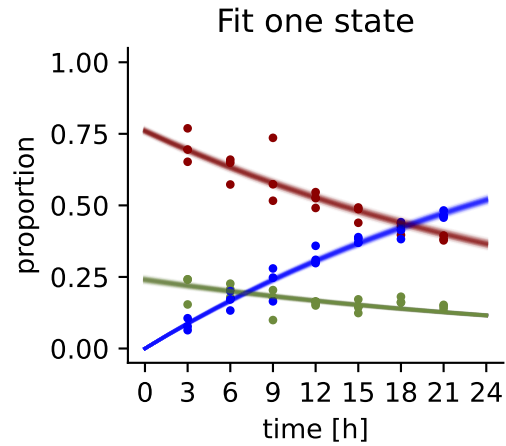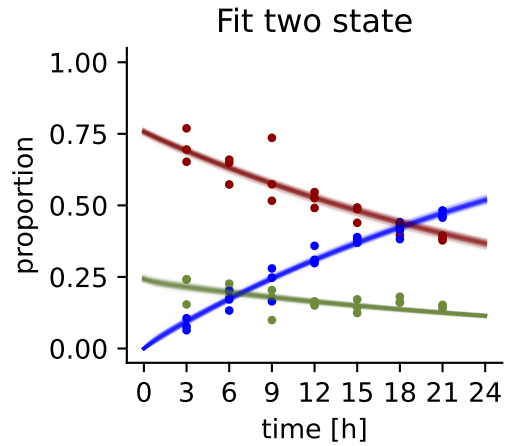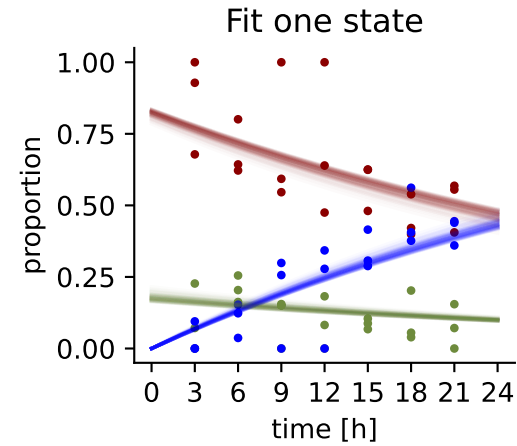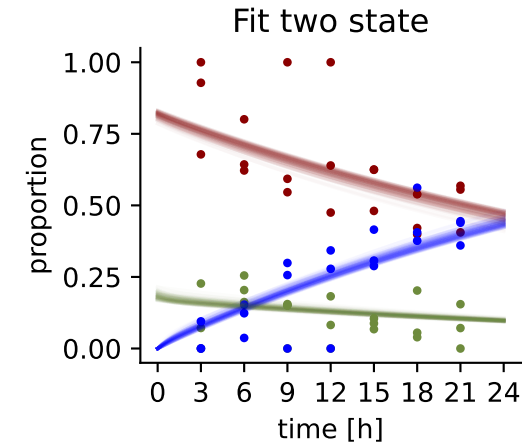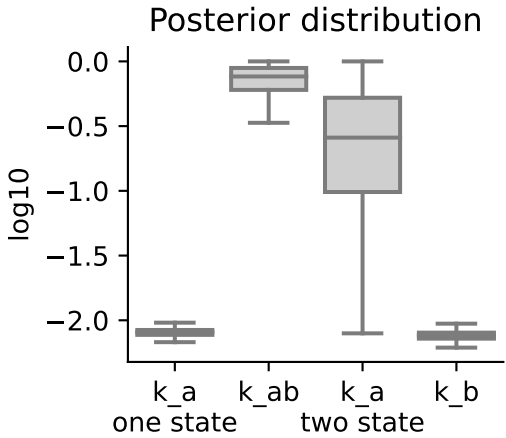

|                          |          |
|--------------------------|----------|
| p value                  | 8.55E-01 |
| log likelihood one state | 119.289  |
| log likelihood two state | 119.446  |
| rmse one state           | 0.321    |
| rmse two state           | 0.322    |
| k_a one state            | 0.008    |
| k_ab                     | 0.765    |
| k_a two state            | 0.258    |
| k_b                      | 0.008    |
| sigma one state          | 0.037    |
| sigma two state          | 0.038    |

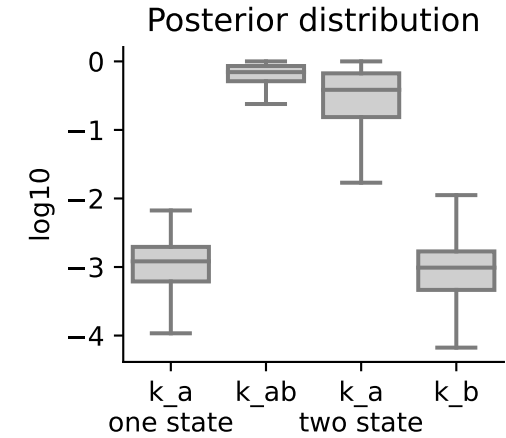

|                          |          |
|--------------------------|----------|
| p value                  | 1.00E+00 |
| log likelihood one state | 47.635   |
| log likelihood two state | 47.635   |
| rmse one state           | 0.35     |
| rmse two state           | 0.35     |
| k_a one state            | 0.001    |
| k_ab                     | 0.698    |
| k_a two state            | 0.385    |
| k_b                      | 0.001    |
| sigma one state          | 0.115    |
| sigma two state          | 0.115    |

bS1m  
MRPS28  
Q9Y2Q9  
28S ribosomal protein S28, mitochondrial

Cell lysate

Mitochondria

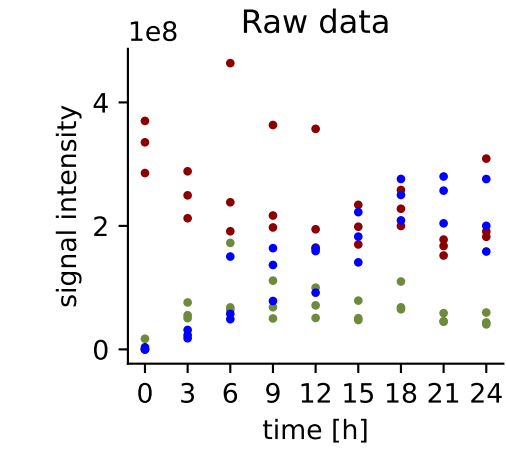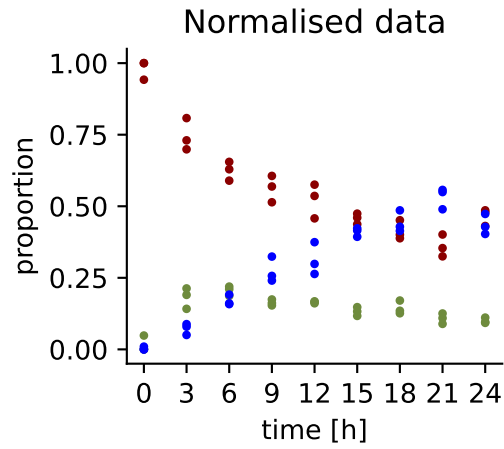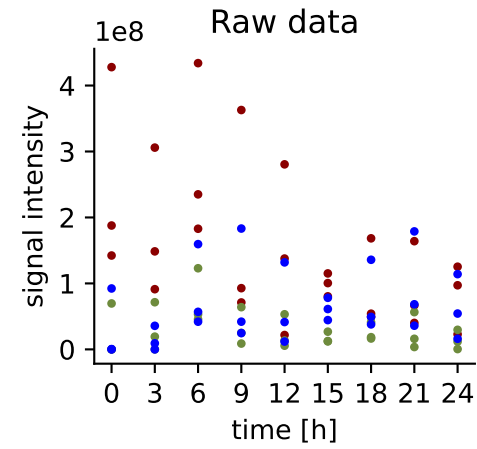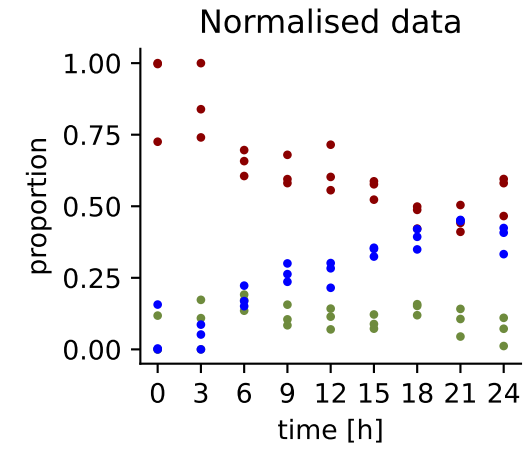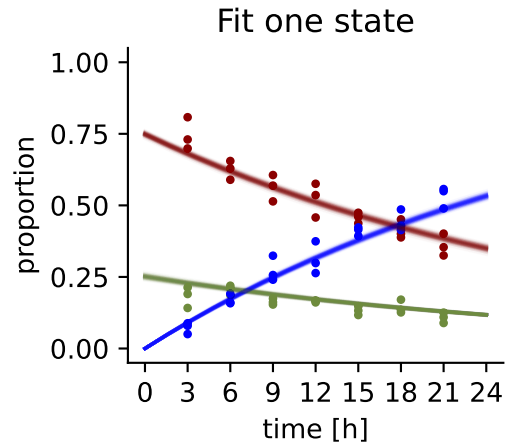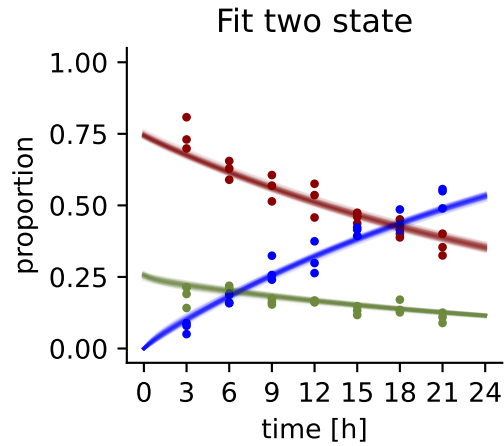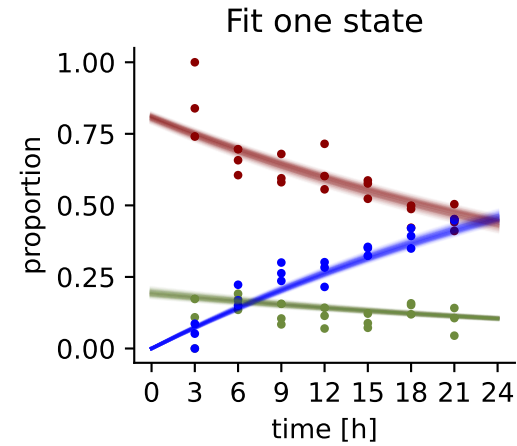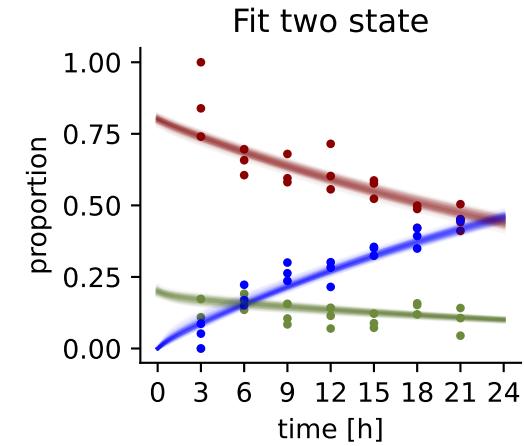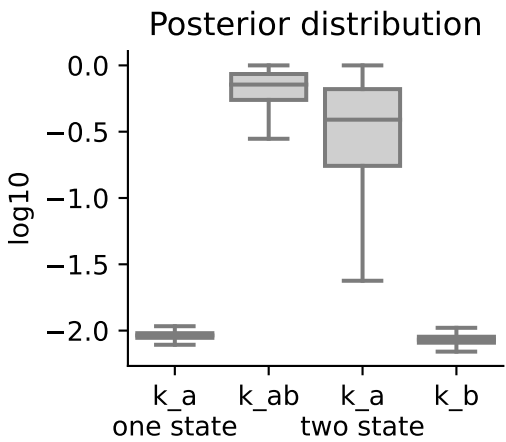

|                          |          |
|--------------------------|----------|
| p value                  | 7.16E-01 |
| log likelihood one state | 117.13   |
| log likelihood two state | 117.464  |
| rmse one state           | 0.346    |
| rmse two state           | 0.339    |
| k_a one state            | 0.009    |
| k_ab                     | 0.717    |
| k_a two state            | 0.39     |
| k_b                      | 0.009    |
| sigma one state          | 0.038    |
| sigma two state          | 0.038    |

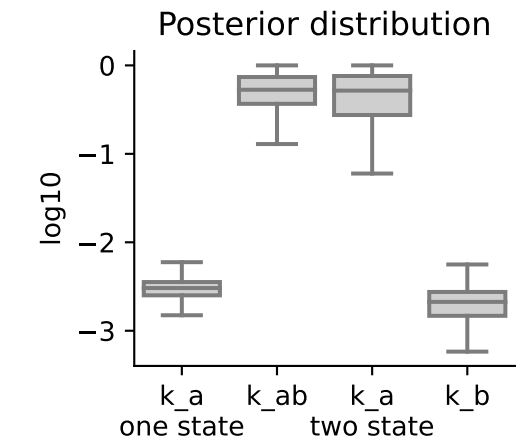

|                          |          |
|--------------------------|----------|
| p value                  | 2.36E-01 |
| log likelihood one state | 87.709   |
| log likelihood two state | 89.151   |
| rmse one state           | 0.321    |
| rmse two state           | 0.301    |
| k_a one state            | 0.003    |
| k_ab                     | 0.53     |
| k_a two state            | 0.519    |
| k_b                      | 0.002    |
| sigma one state          | 0.061    |
| sigma two state          | 0.06     |

uS2m  
MRPS2  
Q9Y399  
28S ribosomal protein S2, mitochondrial

Cell lysate

Mitochondria

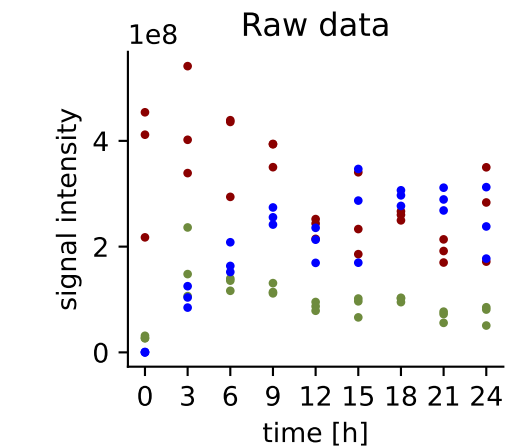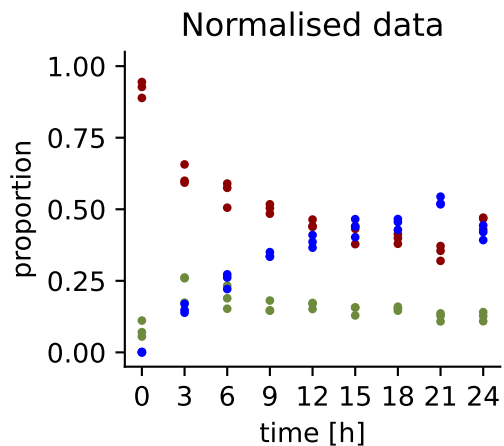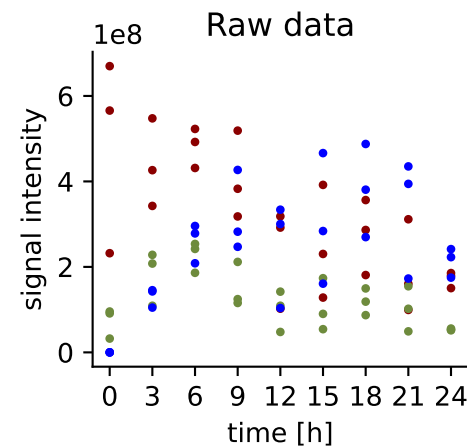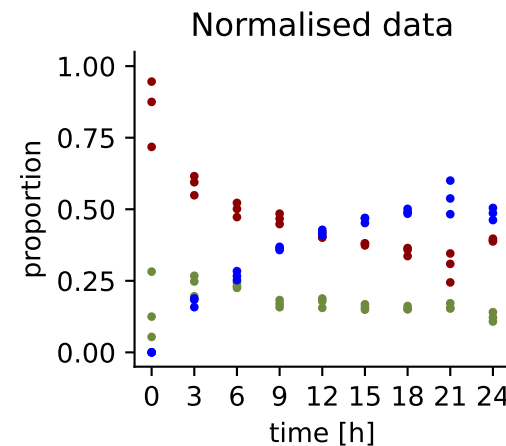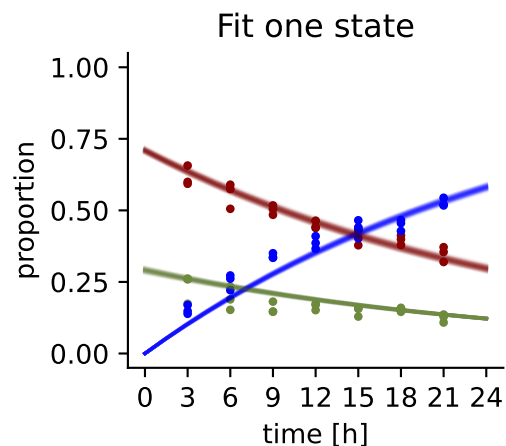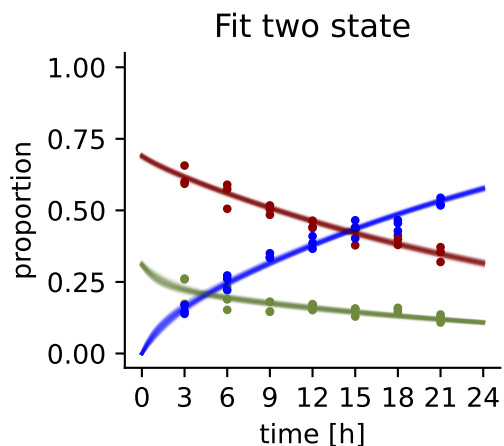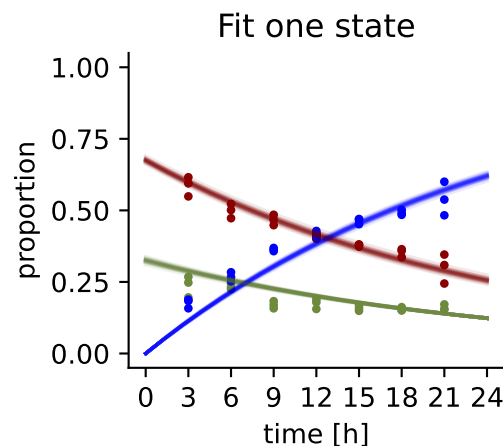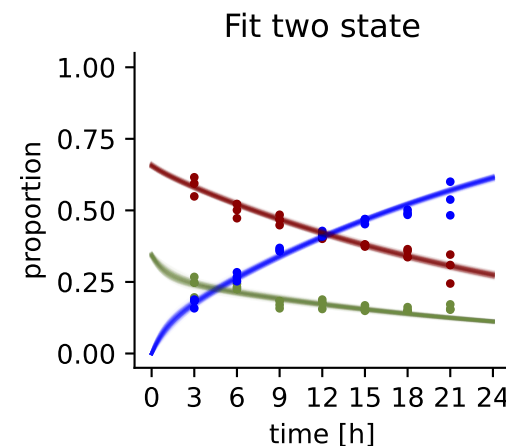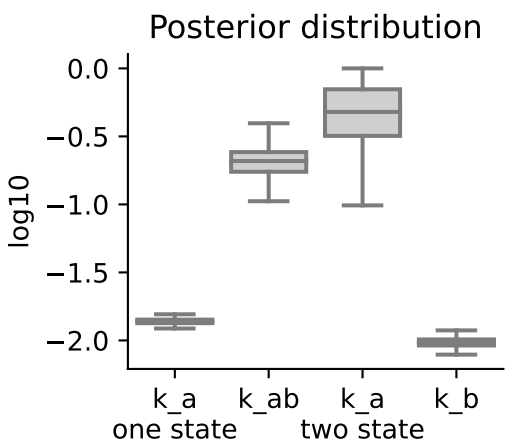

|                          |          |
|--------------------------|----------|
| p value                  | 3.54E-12 |
| log likelihood one state | 117.312  |
| log likelihood two state | 143.68   |
| rmse one state           | 0.358    |
| rmse two state           | 0.302    |
| k_a one state            | 0.014    |
| k_ab                     | 0.208    |
| k_a two state            | 0.479    |
| k_b                      | 0.01     |
| sigma one state          | 0.038    |
| sigma two state          | 0.026    |

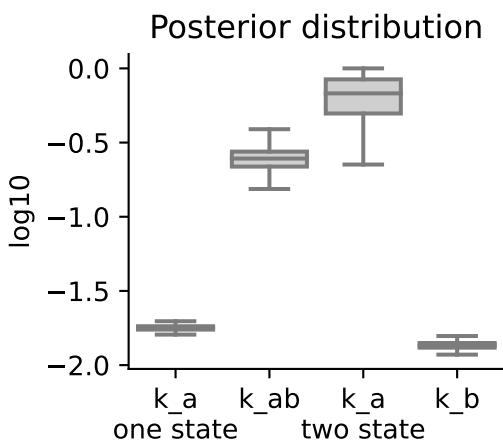

|                          |          |
|--------------------------|----------|
| p value                  | 6.97E-12 |
| log likelihood one state | 116.507  |
| log likelihood two state | 142.197  |
| rmse one state           | 0.375    |
| rmse two state           | 0.31     |
| k_a one state            | 0.018    |
| k_ab                     | 0.247    |
| k_a two state            | 0.679    |
| k_b                      | 0.014    |
| sigma one state          | 0.039    |
| sigma two state          | 0.026    |



uS3m  
MRPS24  
Q96EL2  
28S ribosomal protein S24, mitochondrial

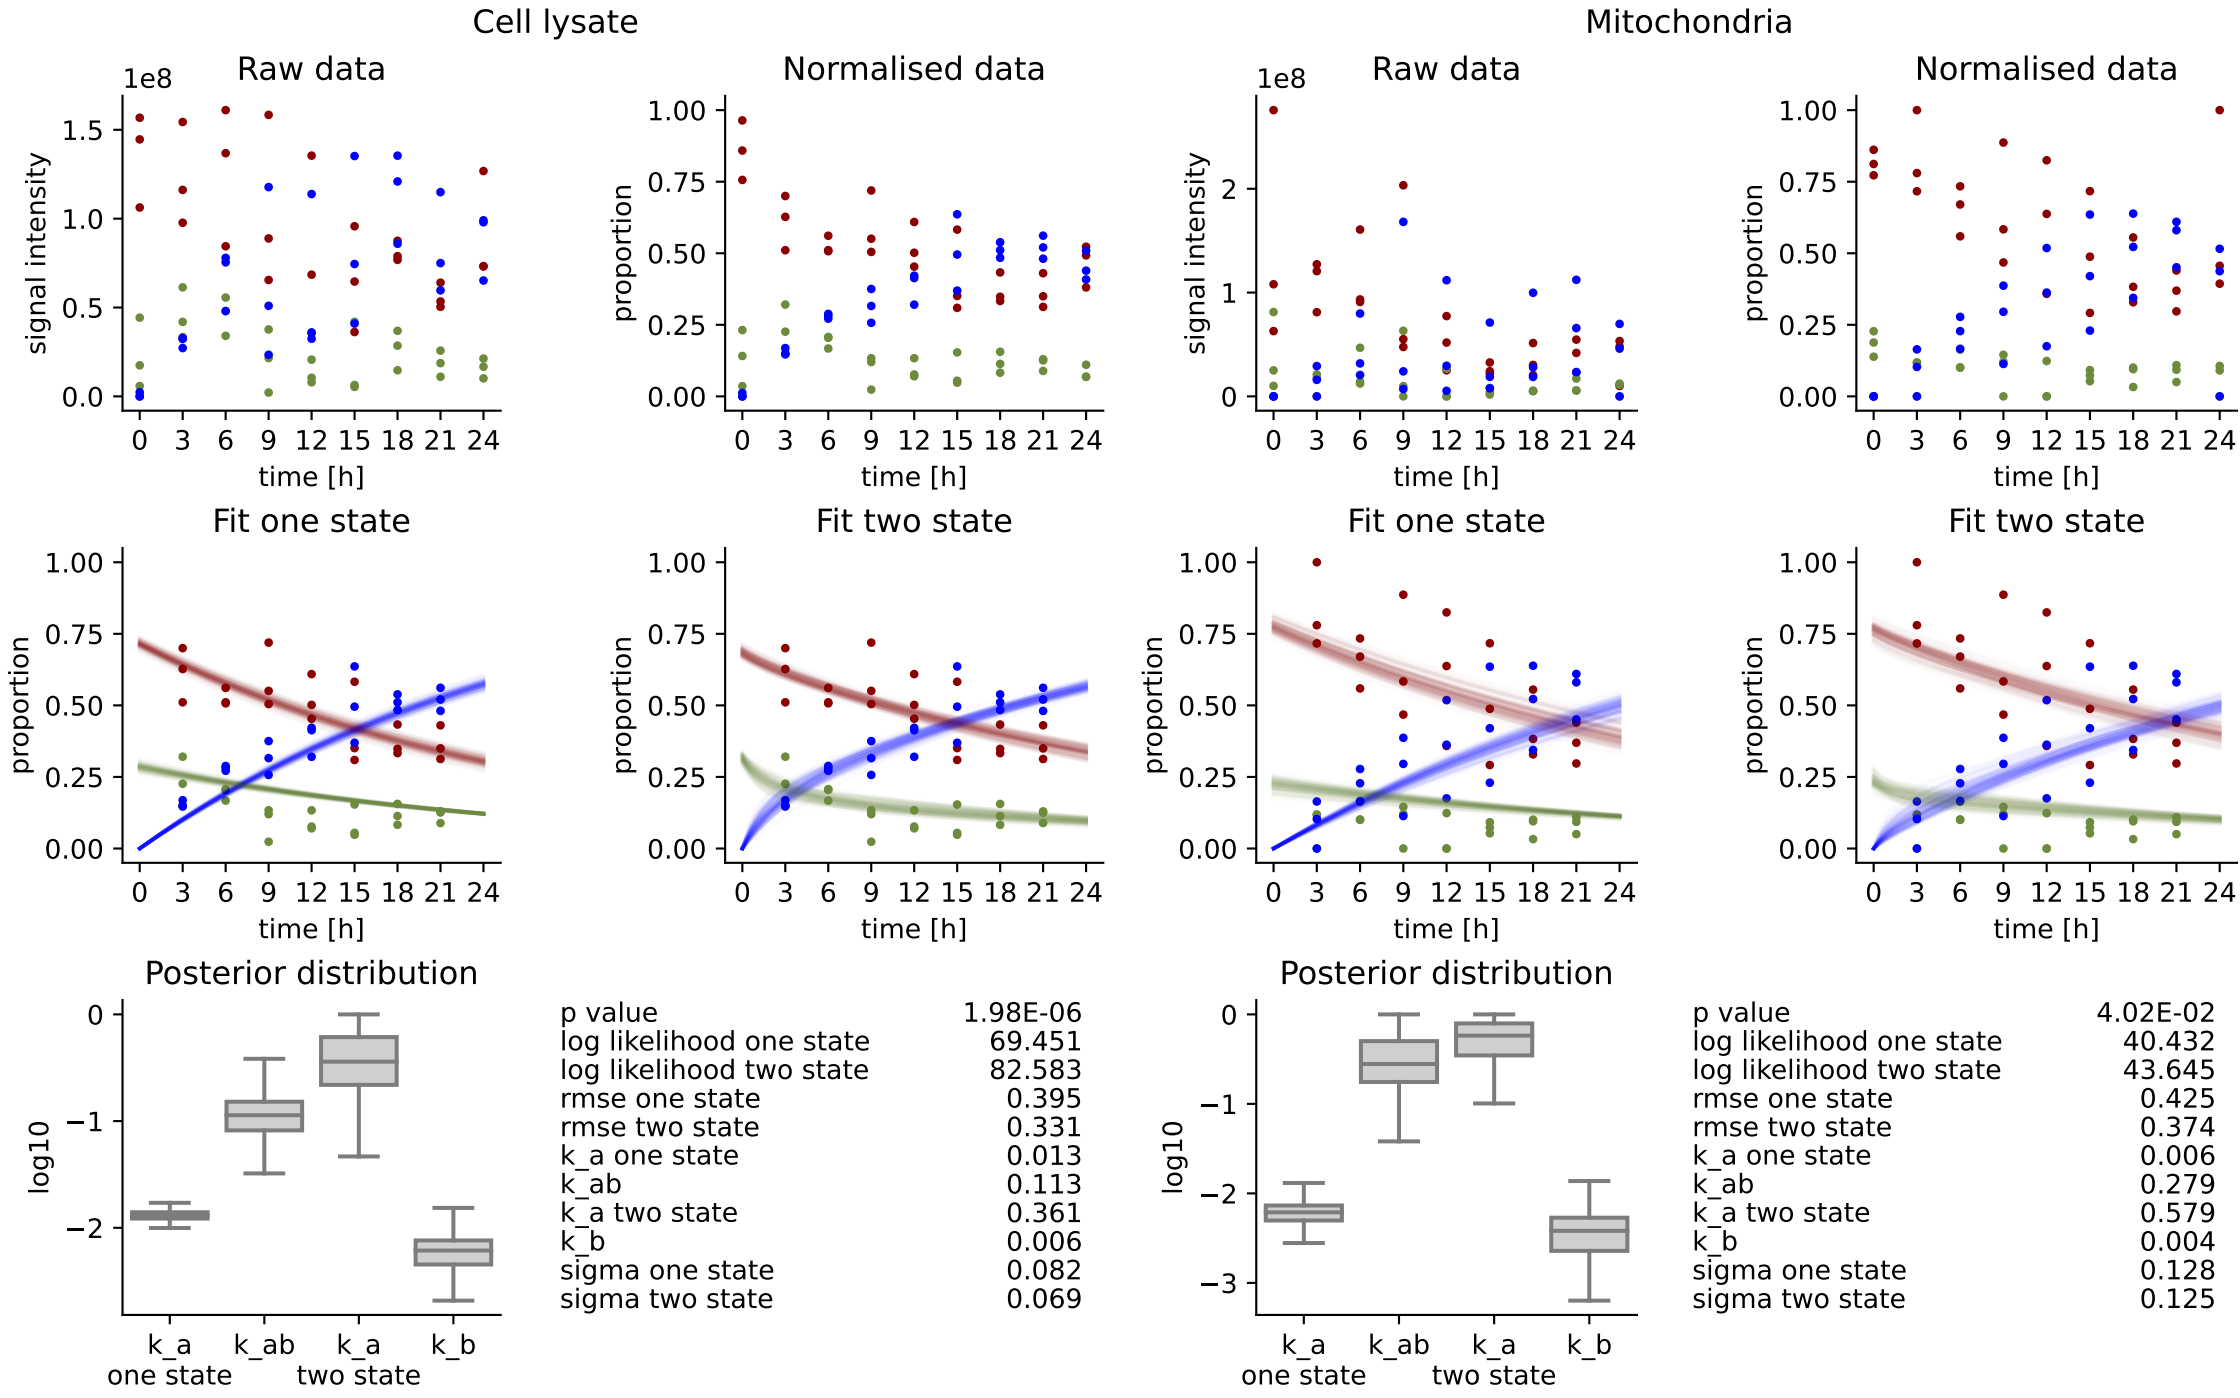

uS5m  
MRPS5  
P82675  
28S ribosomal protein S5, mitochondrial

Cell lysate

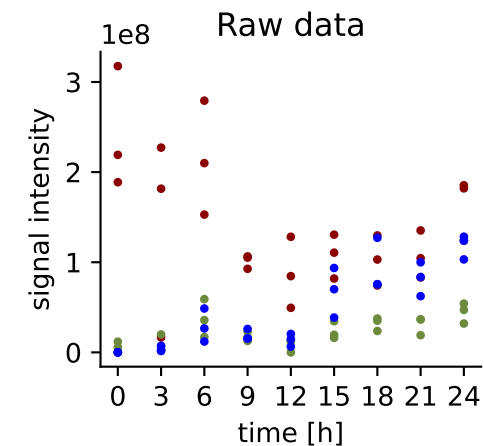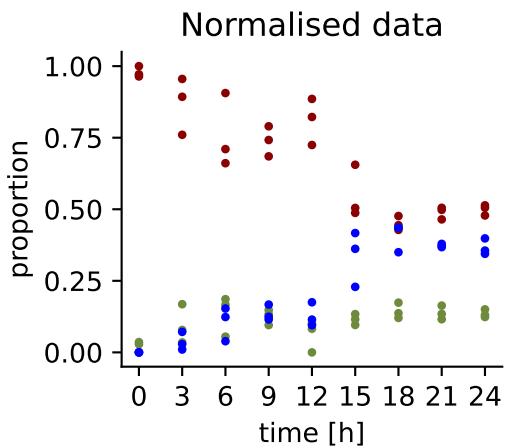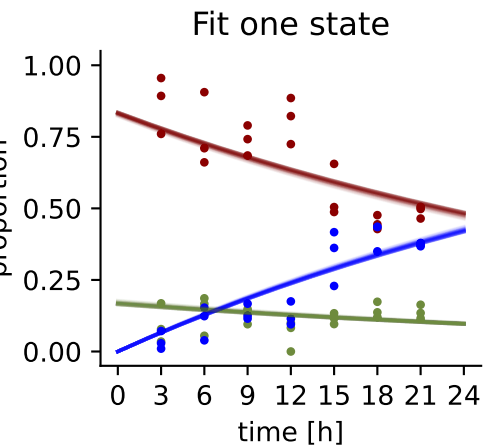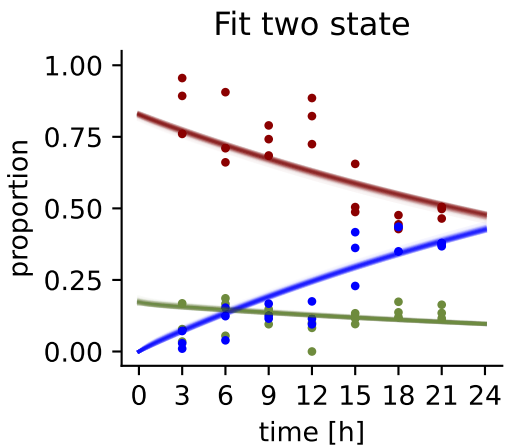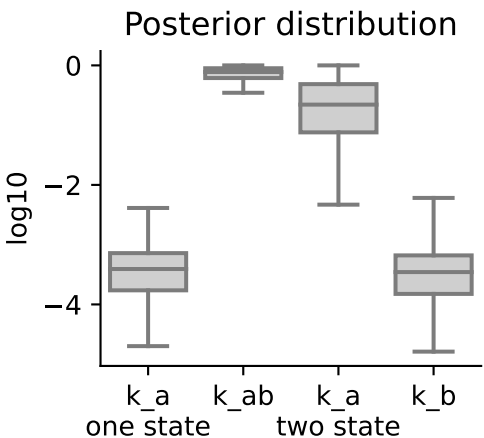

|                          |          |
|--------------------------|----------|
| p value                  | 1.00E+00 |
| log likelihood one state | 67.79    |
| log likelihood two state | 67.763   |
| rmse one state           | 0.299    |
| rmse two state           | 0.298    |
| k_a one state            | 0.0      |
| k_ab                     | 0.775    |
| k_a two state            | 0.221    |
| k_b                      | 0.0      |
| sigma one state          | 0.084    |
| sigma two state          | 0.085    |

Mitochondria

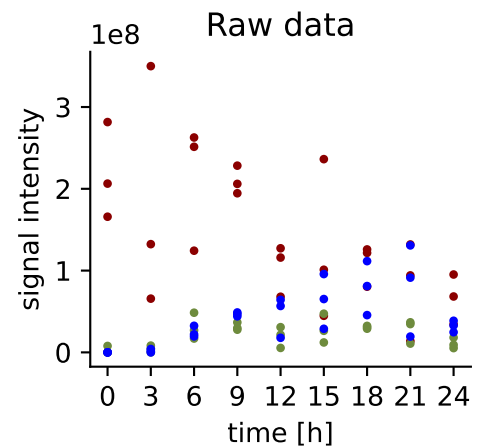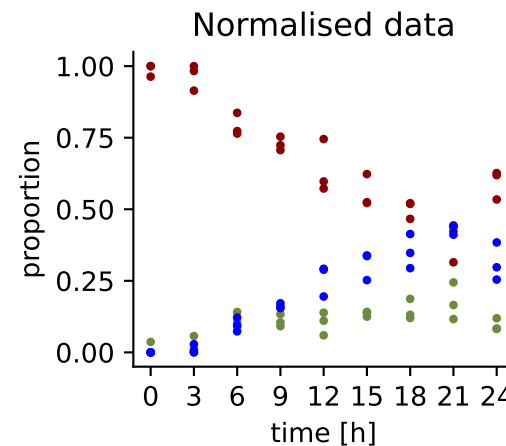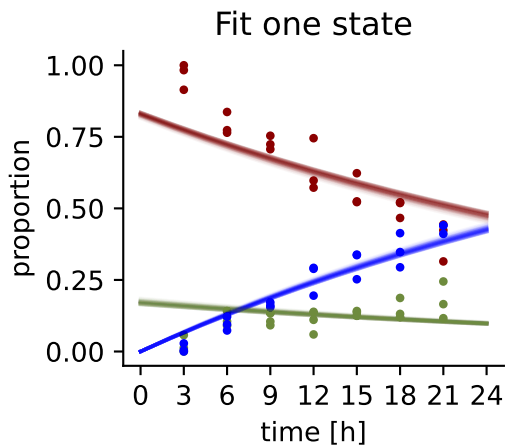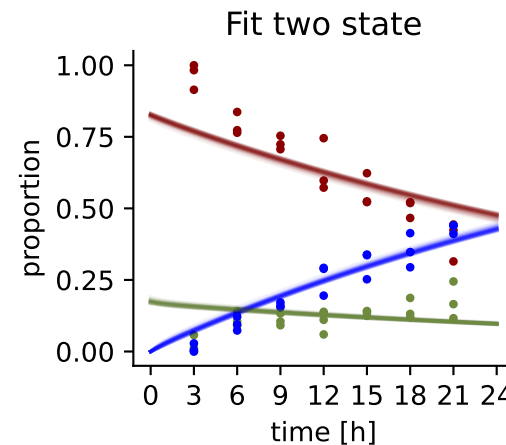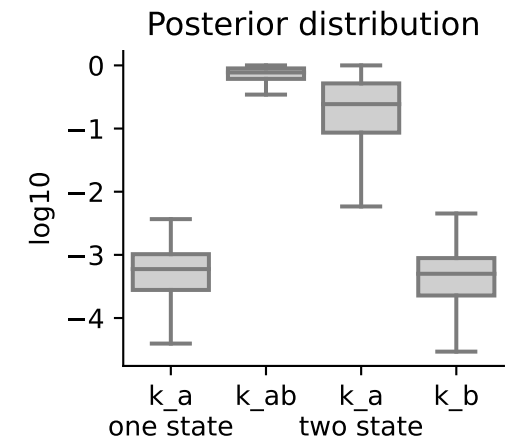

|                          |          |
|--------------------------|----------|
| p value                  | 1.00E+00 |
| log likelihood one state | 72.576   |
| log likelihood two state | 72.57    |
| rmse one state           | 0.319    |
| rmse two state           | 0.319    |
| k_a one state            | 0.001    |
| k_ab                     | 0.773    |
| k_a two state            | 0.244    |
| k_b                      | 0.001    |
| sigma one state          | 0.078    |
| sigma two state          | 0.079    |

bS6m  
MRPS6  
P82932  
28S ribosomal protein S6, mitochondrial

Cell lysate

Mitochondria

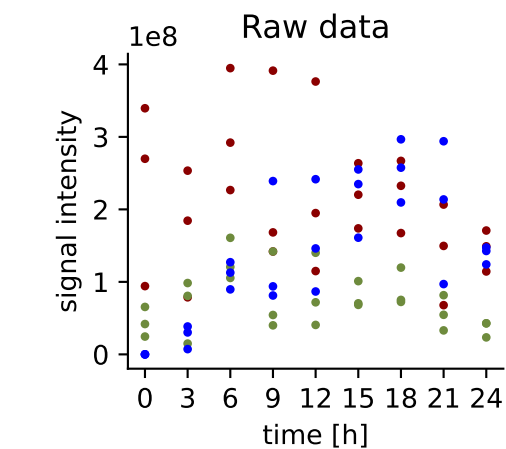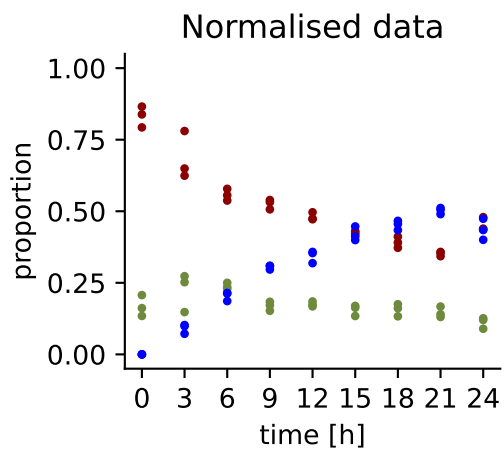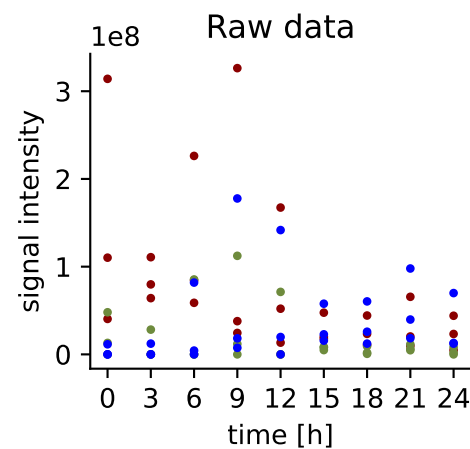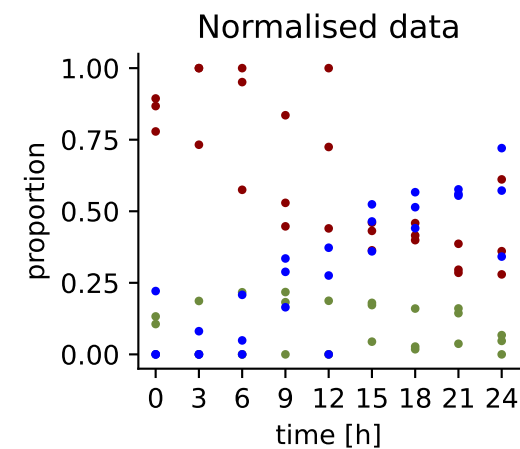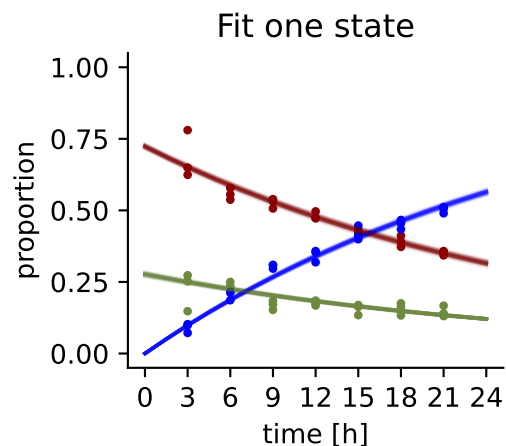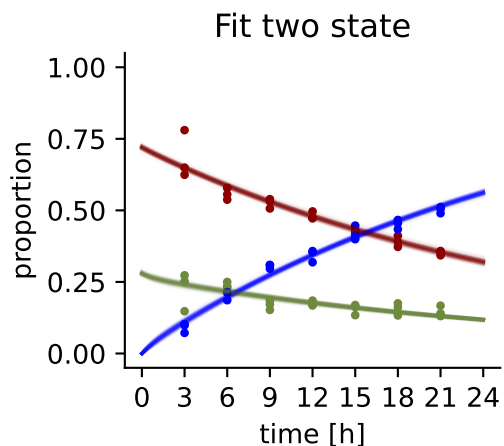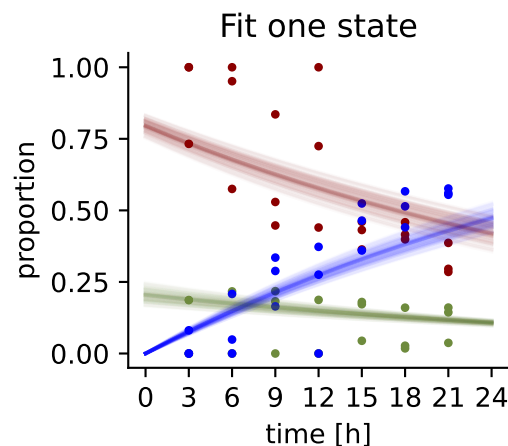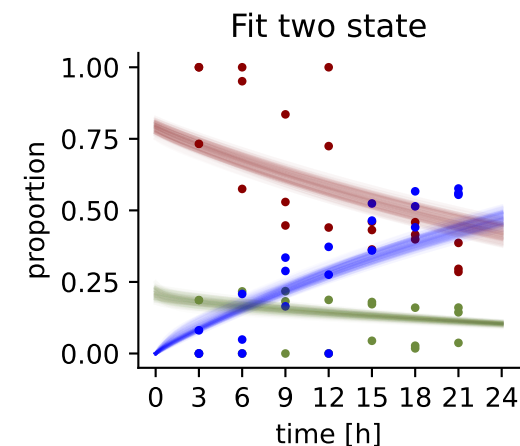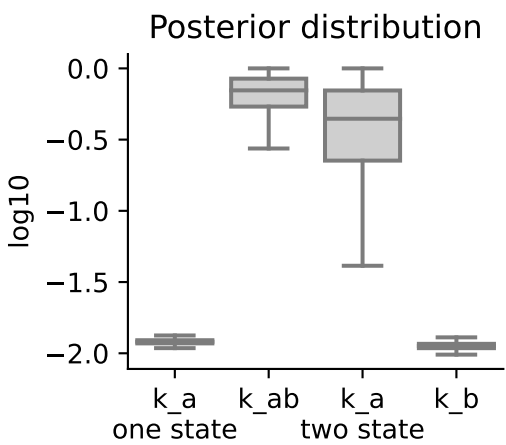

|                          |          |
|--------------------------|----------|
| p value                  | 2.13E-01 |
| log likelihood one state | 133.572  |
| log likelihood two state | 135.117  |
| rmse one state           | 0.343    |
| rmse two state           | 0.332    |
| k_a one state            | 0.012    |
| k_ab                     | 0.701    |
| k_a two state            | 0.443    |
| k_b                      | 0.011    |
| sigma one state          | 0.03     |
| sigma two state          | 0.029    |

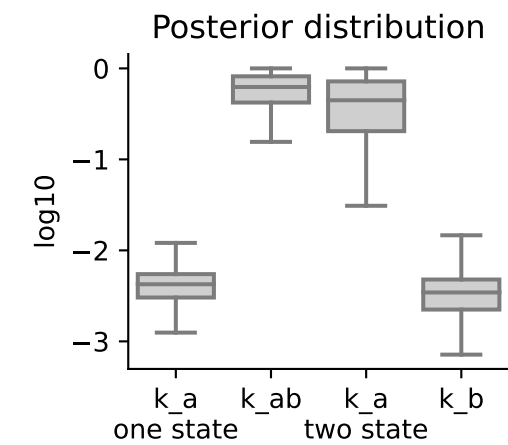

|                          |          |
|--------------------------|----------|
| p value                  | 9.74E-01 |
| log likelihood one state | 32.168   |
| log likelihood two state | 32.195   |
| rmse one state           | 0.438    |
| rmse two state           | 0.436    |
| k_a one state            | 0.004    |
| k_ab                     | 0.625    |
| k_a two state            | 0.447    |
| k_b                      | 0.003    |
| sigma one state          | 0.146    |
| sigma two state          | 0.146    |

uS7m  
MRPS7  
Q9Y2R9  
28S ribosomal protein S7, mitochondrial

Cell lysate

Mitochondria

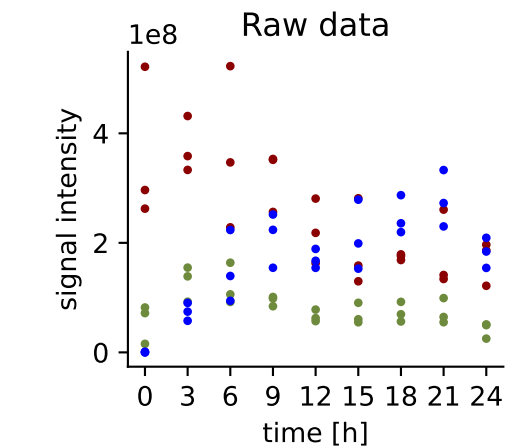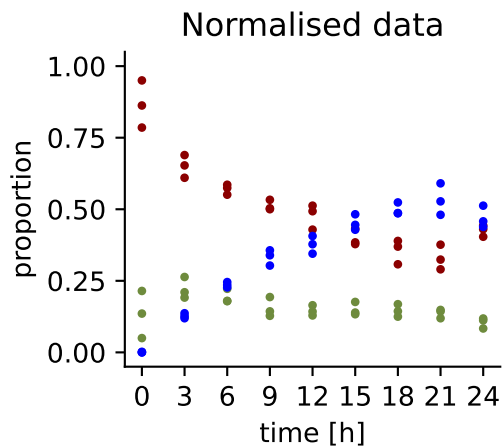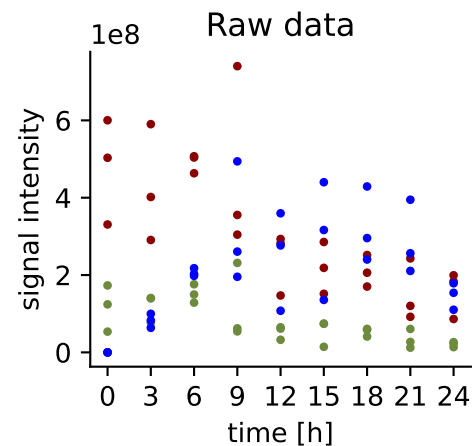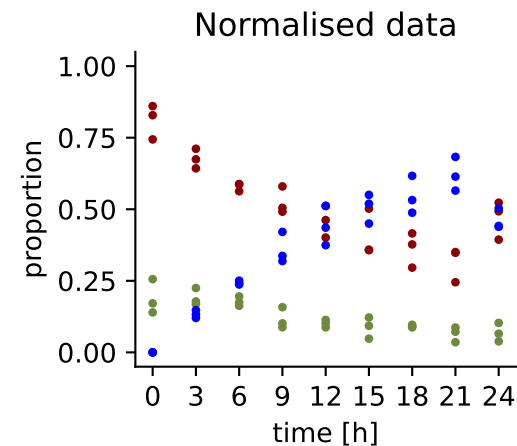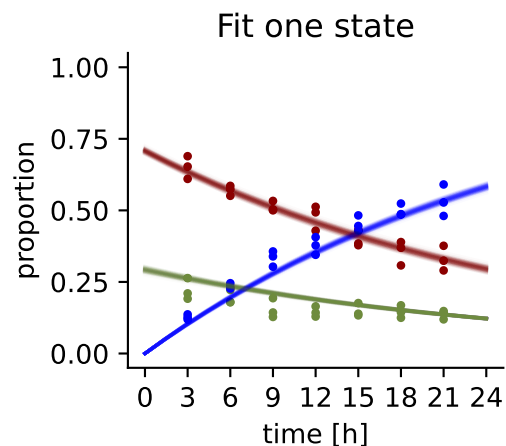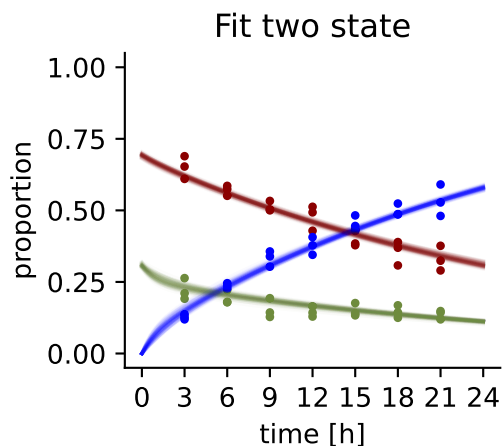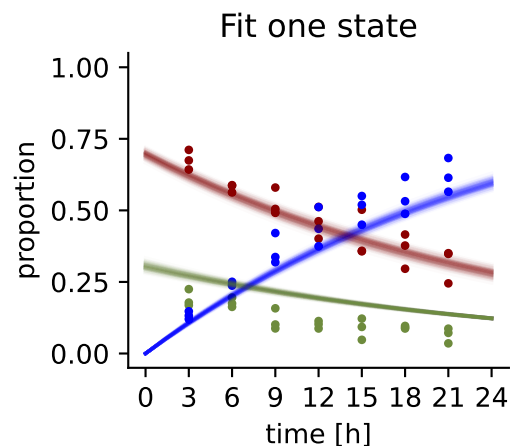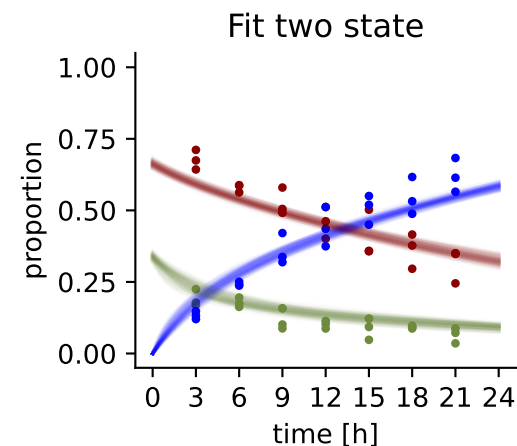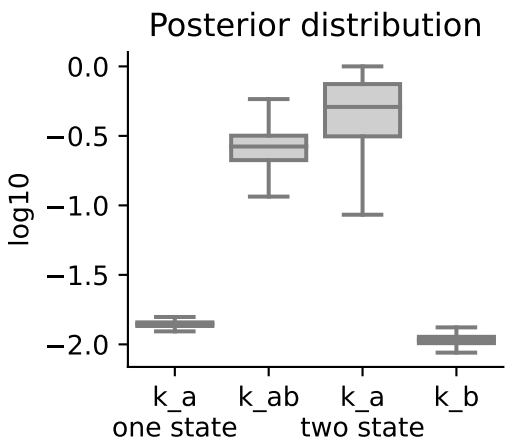

|                          |          |
|--------------------------|----------|
| p value                  | 2.94E-07 |
| log likelihood one state | 117.211  |
| log likelihood two state | 132.25   |
| rmse one state           | 0.371    |
| rmse two state           | 0.329    |
| k_a one state            | 0.014    |
| k_ab                     | 0.265    |
| k_a two state            | 0.511    |
| k_b                      | 0.011    |
| sigma one state          | 0.038    |
| sigma two state          | 0.031    |

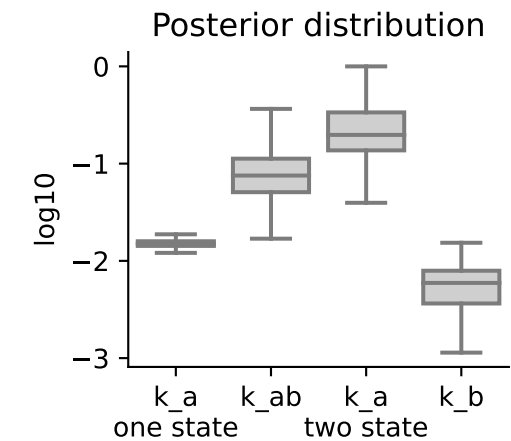

|                          |          |
|--------------------------|----------|
| p value                  | 5.33E-09 |
| log likelihood one state | 76.935   |
| log likelihood two state | 95.984   |
| rmse one state           | 0.426    |
| rmse two state           | 0.371    |
| k_a one state            | 0.015    |
| k_ab                     | 0.075    |
| k_a two state            | 0.197    |
| k_b                      | 0.006    |
| sigma one state          | 0.073    |
| sigma two state          | 0.056    |

uS9m  
MRPS9  
P82933  
28S ribosomal protein S9, mitochondrial

Cell lysate

Mitochondria

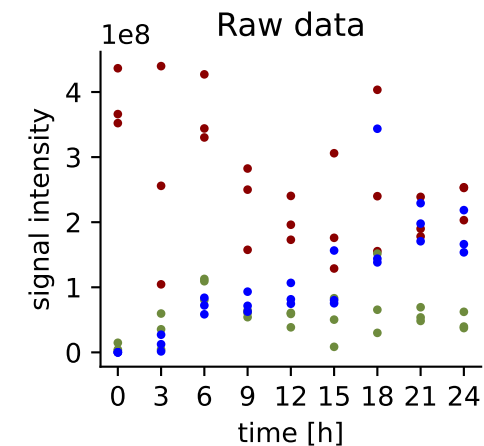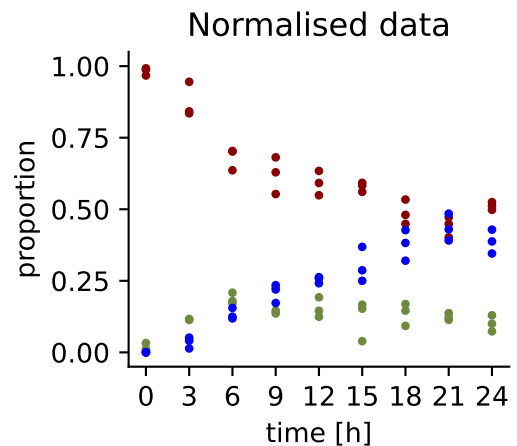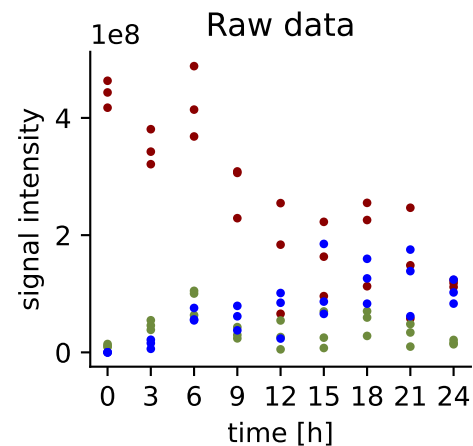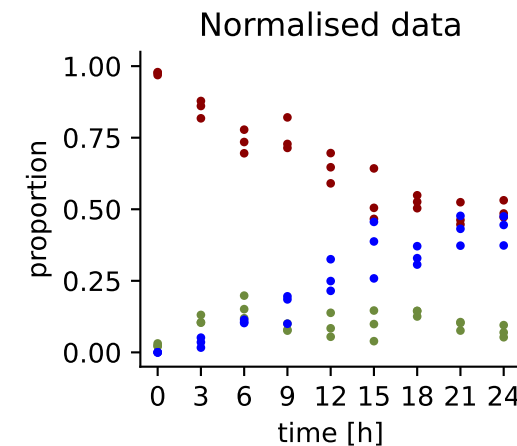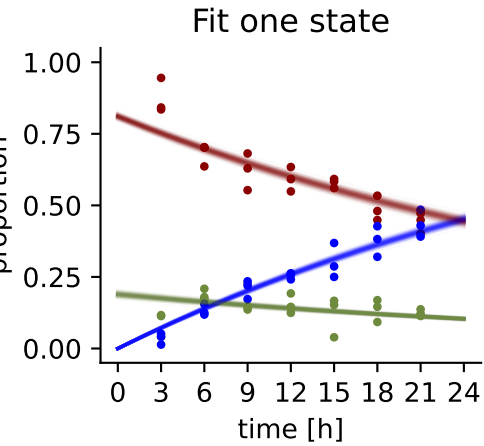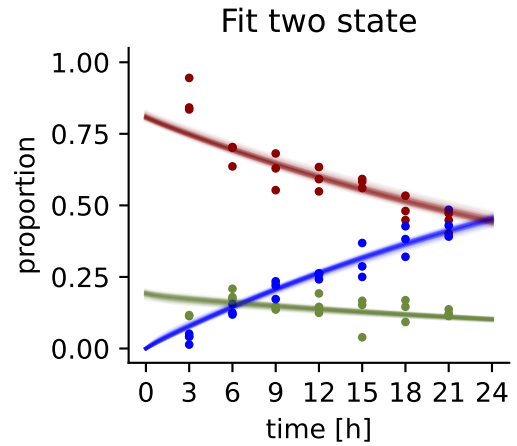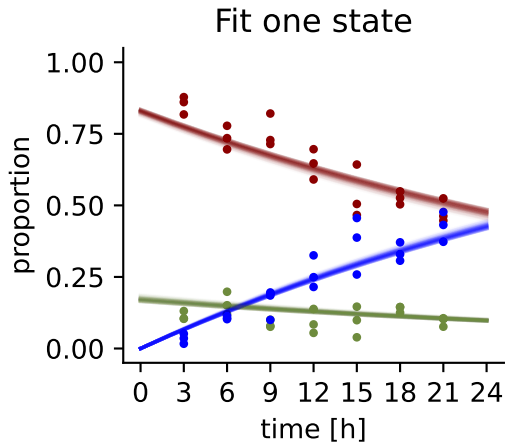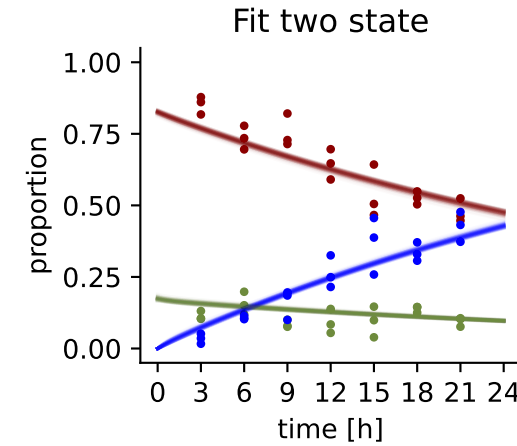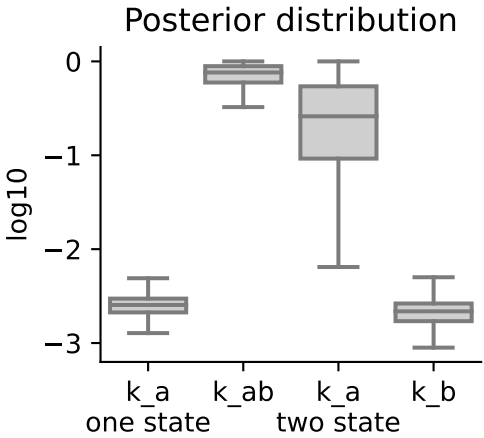

|                          |          |
|--------------------------|----------|
| p value                  | 7.62E-01 |
| log likelihood one state | 97.693   |
| log likelihood two state | 97.965   |
| rmse one state           | 0.301    |
| rmse two state           | 0.301    |
| k_a one state            | 0.003    |
| k_ab                     | 0.762    |
| k_a two state            | 0.26     |
| k_b                      | 0.002    |
| sigma one state          | 0.052    |
| sigma two state          | 0.053    |

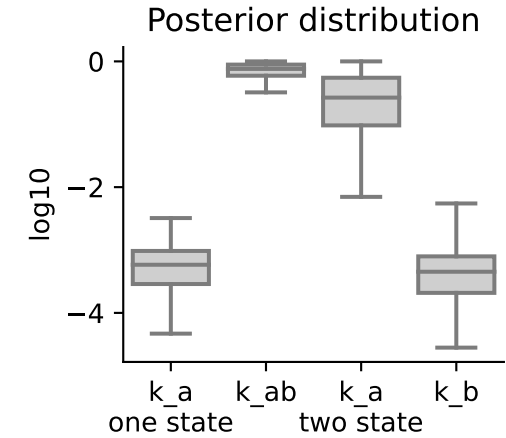

|                          |          |
|--------------------------|----------|
| p value                  | 1.00E+00 |
| log likelihood one state | 92.261   |
| log likelihood two state | 92.26    |
| rmse one state           | 0.3      |
| rmse two state           | 0.3      |
| k_a one state            | 0.001    |
| k_ab                     | 0.759    |
| k_a two state            | 0.265    |
| k_b                      | 0.0      |
| sigma one state          | 0.057    |
| sigma two state          | 0.057    |

uS10m  
MRPS10  
P82664  
28S ribosomal protein S10, mitochondrial

Cell lysate

Mitochondria

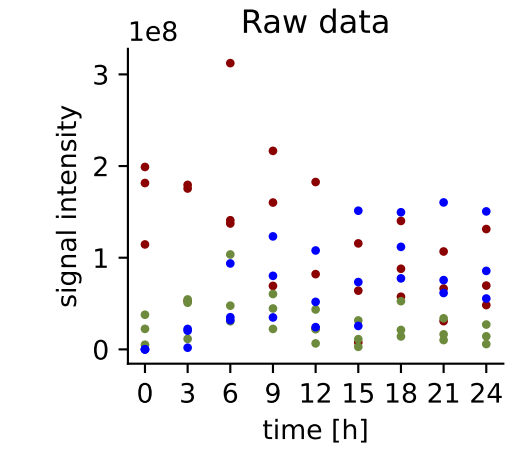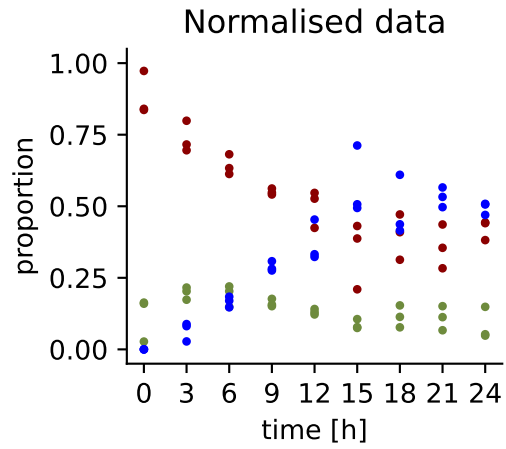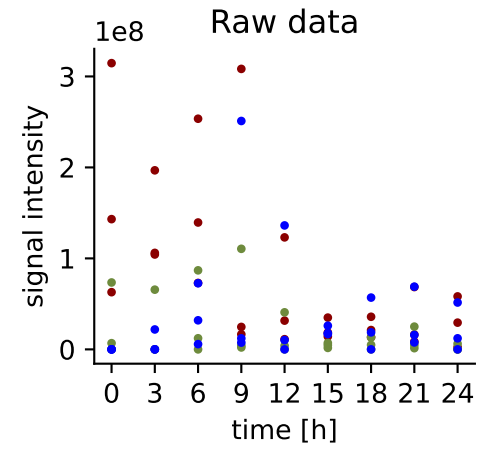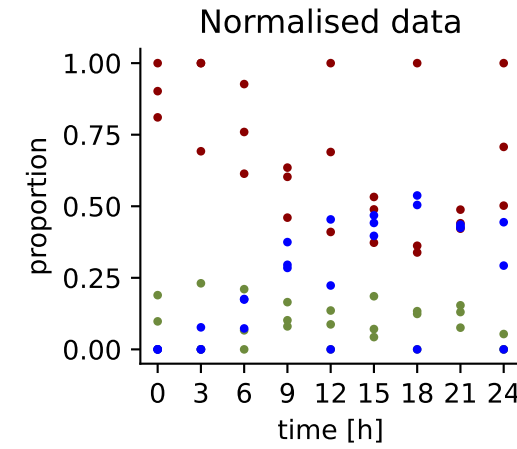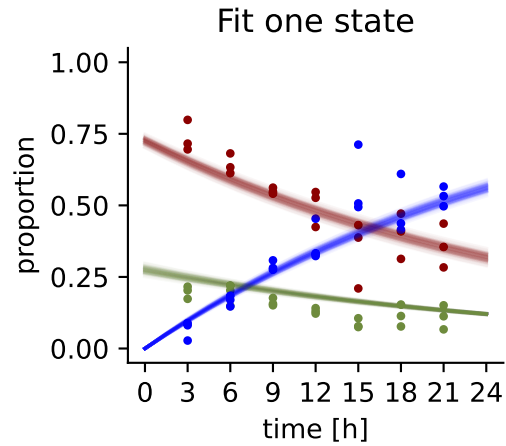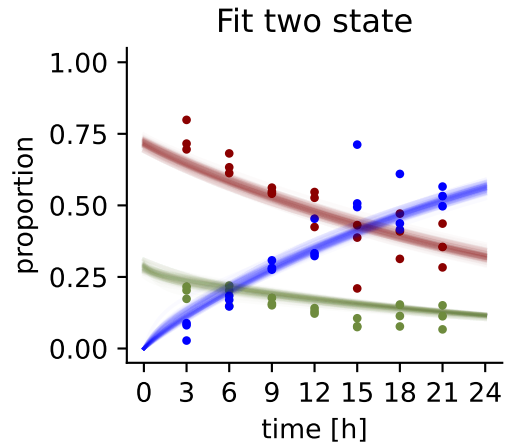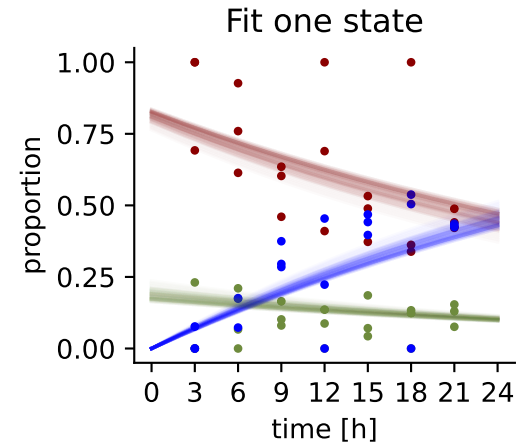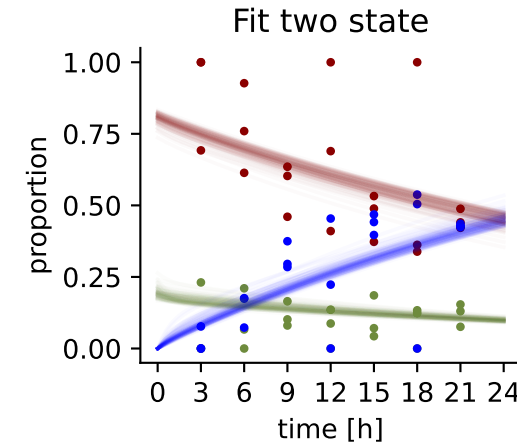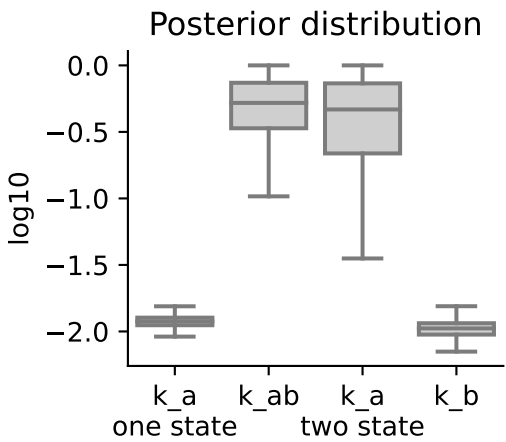

|                          |          |
|--------------------------|----------|
| p value                  | 1.01E-01 |
| log likelihood one state | 74.27    |
| log likelihood two state | 76.564   |
| rmse one state           | 0.398    |
| rmse two state           | 0.38     |
| k_a one state            | 0.012    |
| k_ab                     | 0.522    |
| k_a two state            | 0.467    |
| k_b                      | 0.011    |
| sigma one state          | 0.076    |
| sigma two state          | 0.075    |

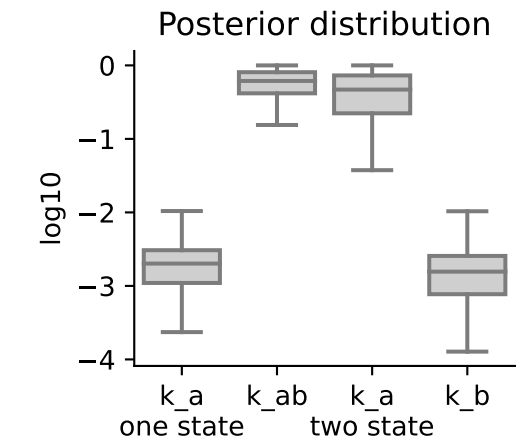

|                          |          |
|--------------------------|----------|
| p value                  | 6.64E-01 |
| log likelihood one state | 32.3     |
| log likelihood two state | 32.71    |
| rmse one state           | 0.395    |
| rmse two state           | 0.377    |
| k_a one state            | 0.002    |
| k_ab                     | 0.614    |
| k_a two state            | 0.469    |
| k_b                      | 0.002    |
| sigma one state          | 0.145    |
| sigma two state          | 0.145    |

uS11m  
MRPS11  
P82912  
28S ribosomal protein S11, mitochondrial

Cell lysate

Mitochondria

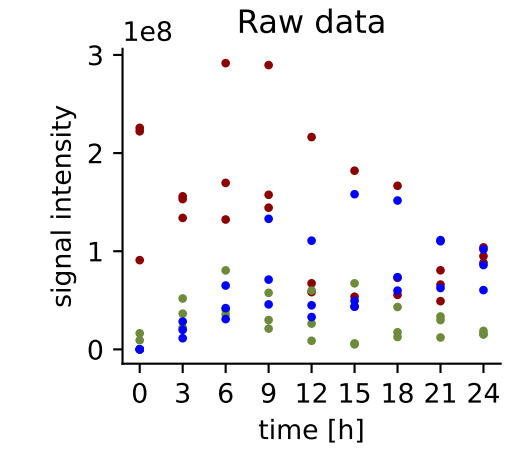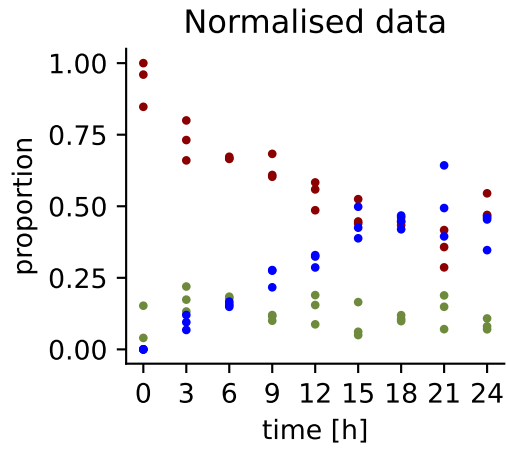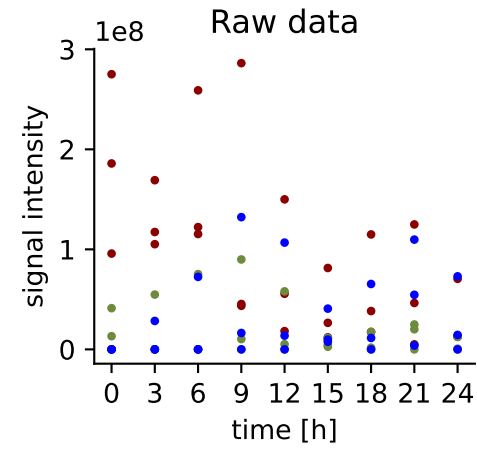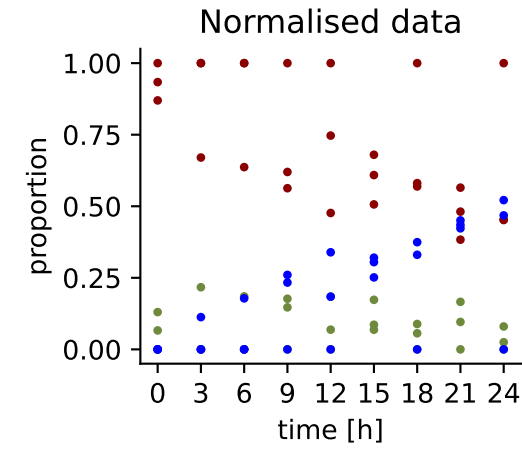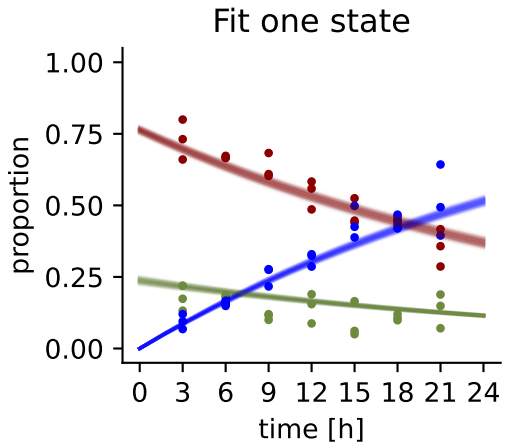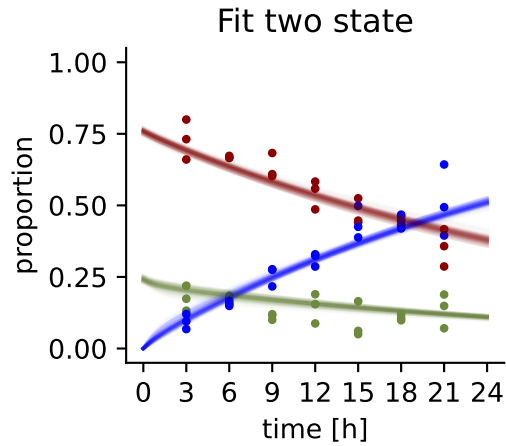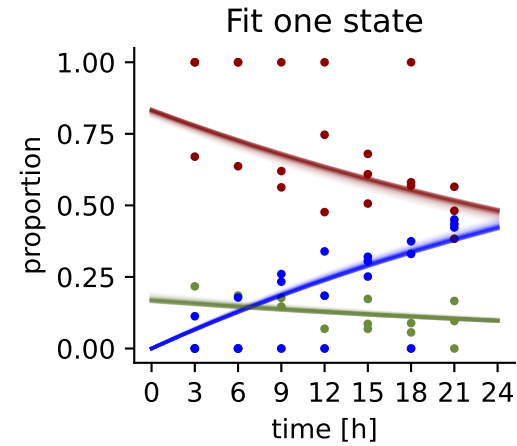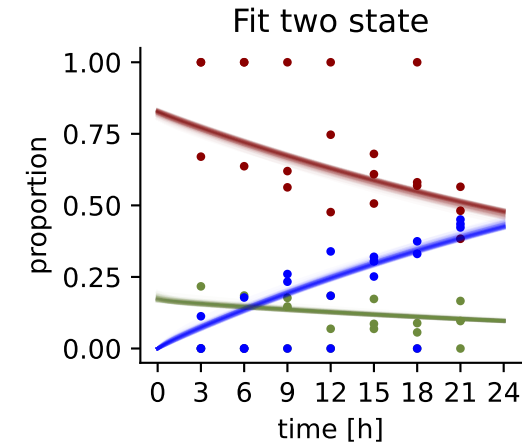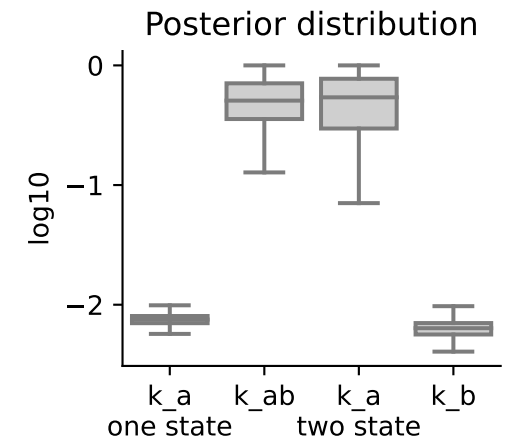

|                          |          |
|--------------------------|----------|
| p value                  | 1.18E-01 |
| log likelihood one state | 94.265   |
| log likelihood two state | 96.401   |
| rmse one state           | 0.352    |
| rmse two state           | 0.334    |
| k_a one state            | 0.008    |
| k_ab                     | 0.508    |
| k_a two state            | 0.541    |
| k_b                      | 0.006    |
| sigma one state          | 0.055    |
| sigma two state          | 0.054    |

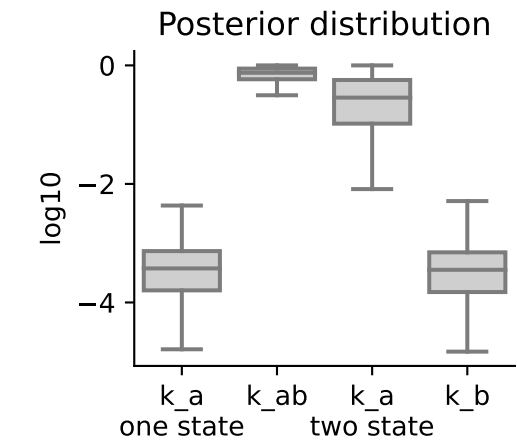

|                          |          |
|--------------------------|----------|
| p value                  | 1.00E+00 |
| log likelihood one state | 34.34    |
| log likelihood two state | 34.329   |
| rmse one state           | 0.324    |
| rmse two state           | 0.324    |
| k_a one state            | 0.0      |
| k_ab                     | 0.751    |
| k_a two state            | 0.286    |
| k_b                      | 0.0      |
| sigma one state          | 0.142    |
| sigma two state          | 0.144    |



uS12m  
MRPS12  
O15235  
28S ribosomal protein S12, mitochondrial

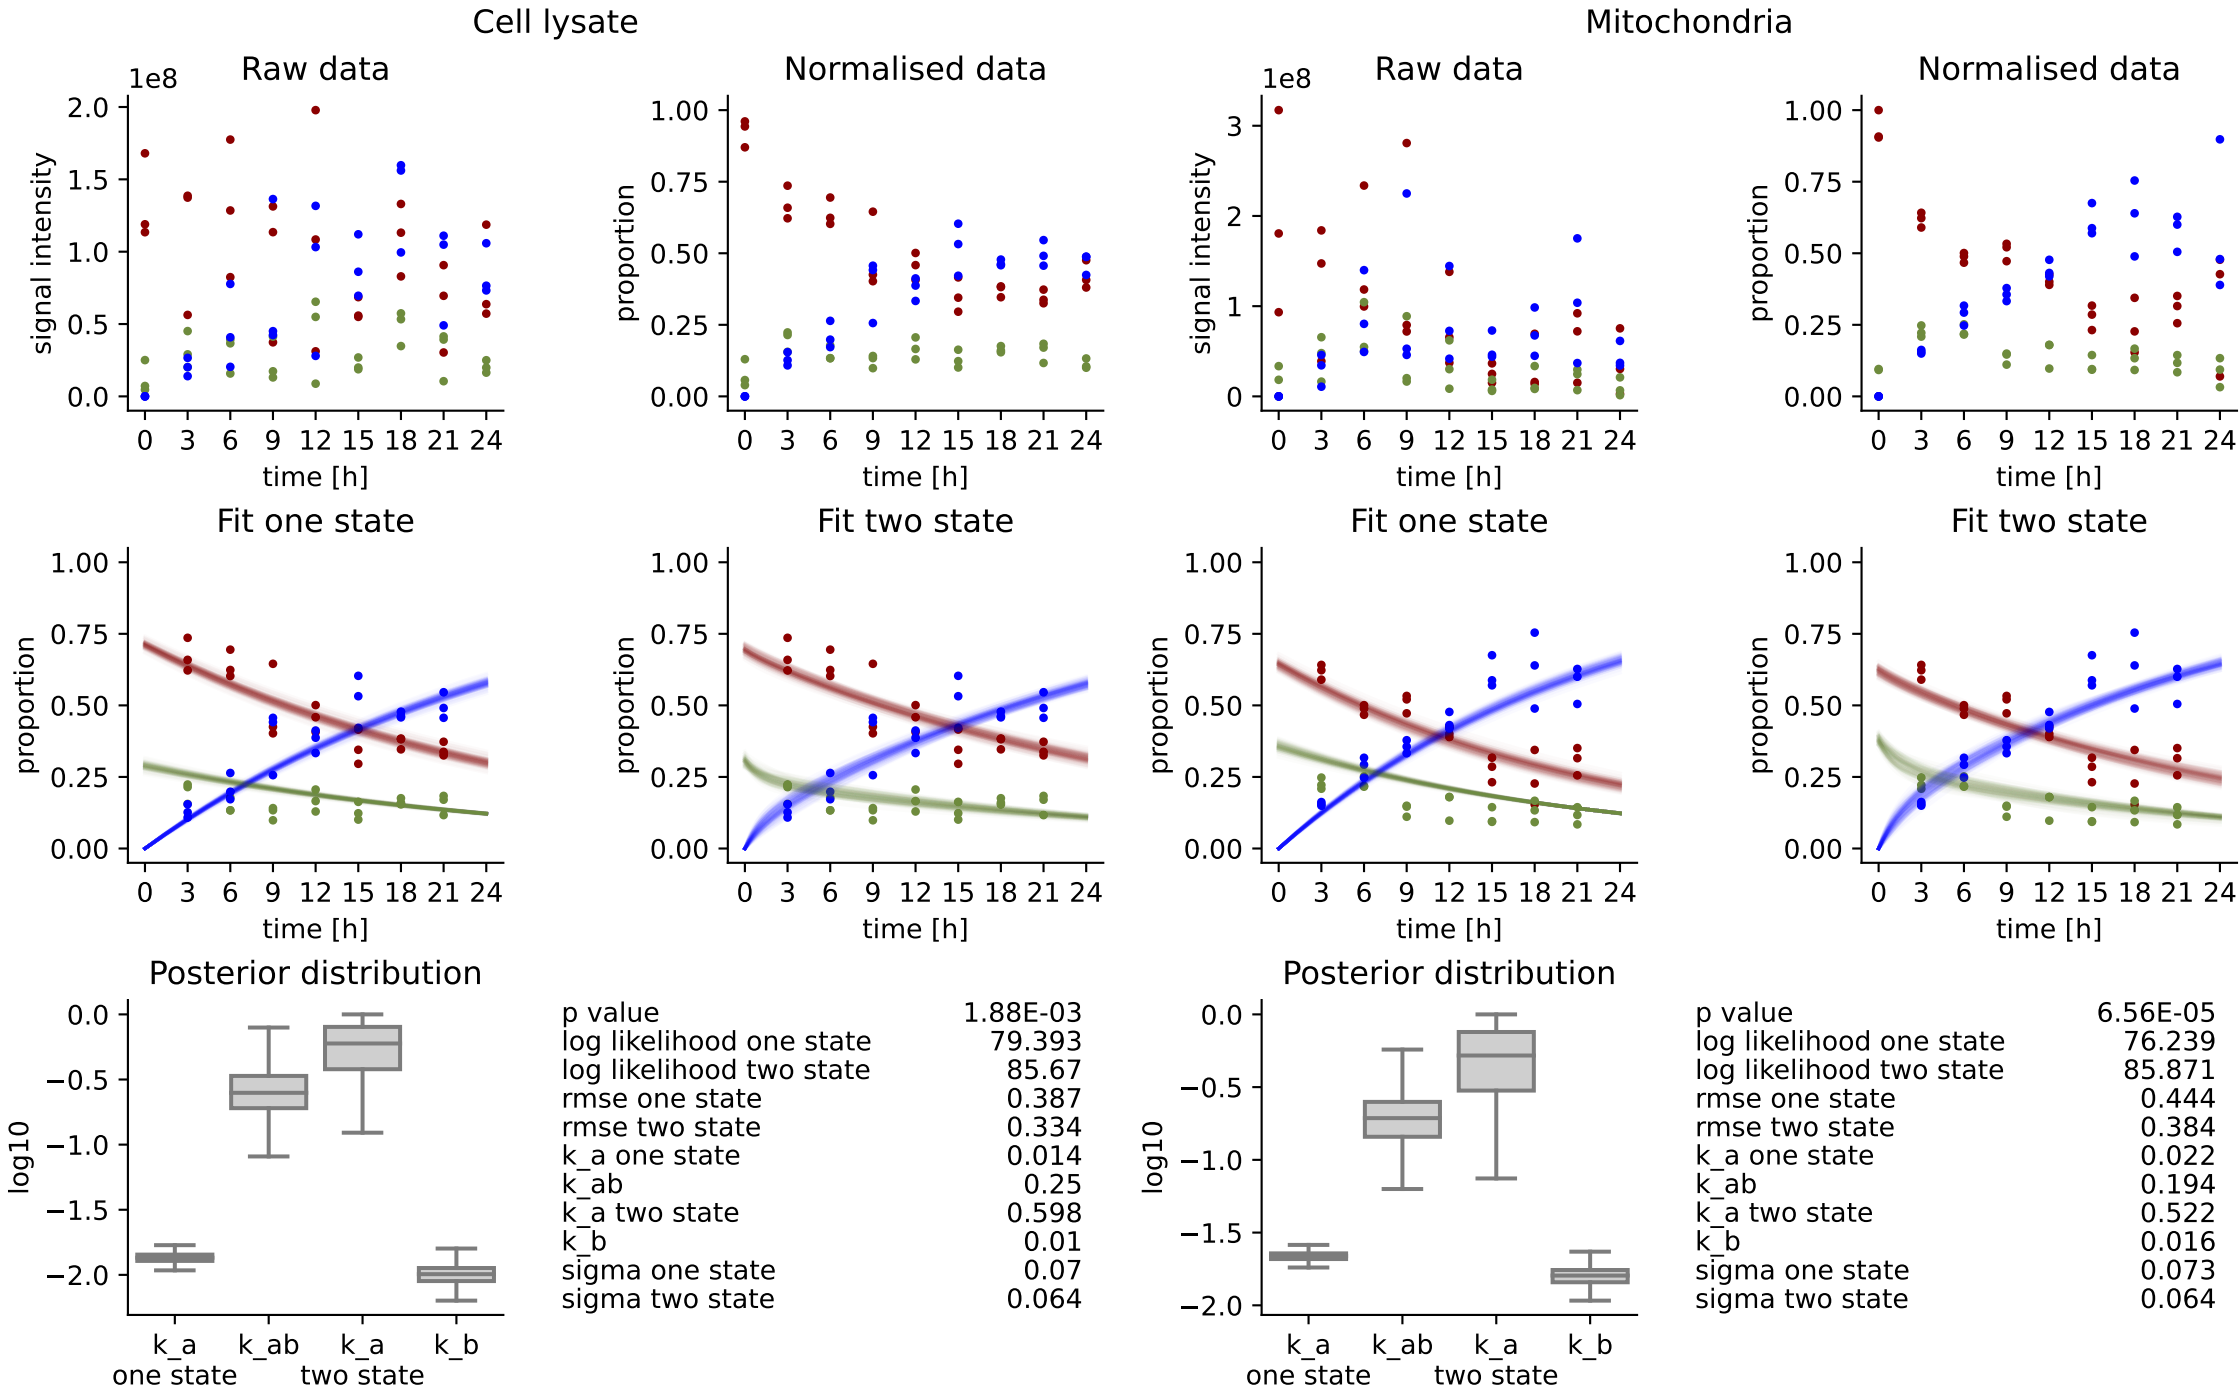

uS14m  
MRPS14  
O60783  
28S ribosomal protein S14, mitochondrial

Cell lysate

Mitochondria

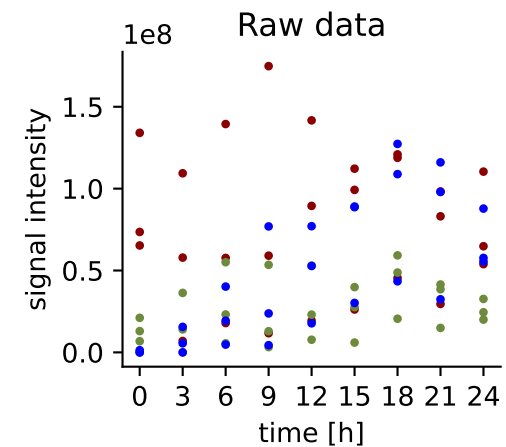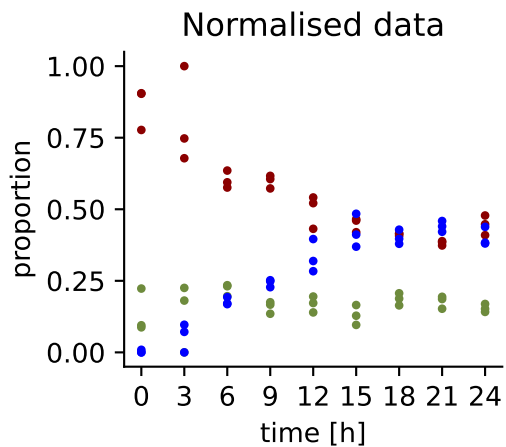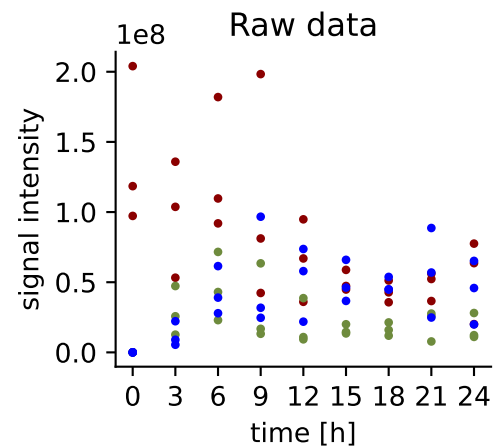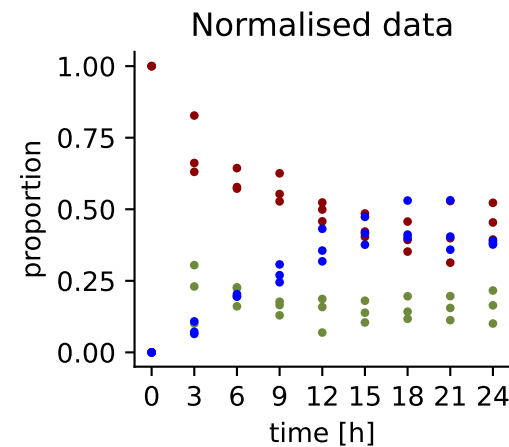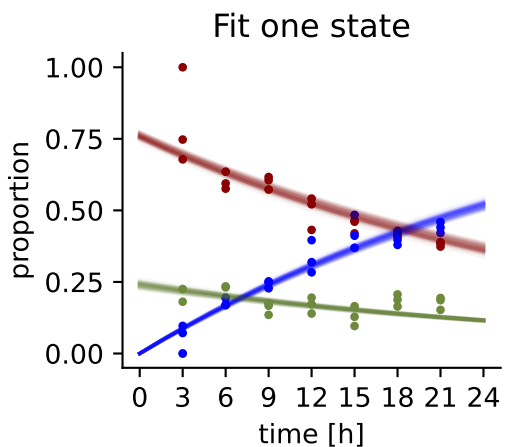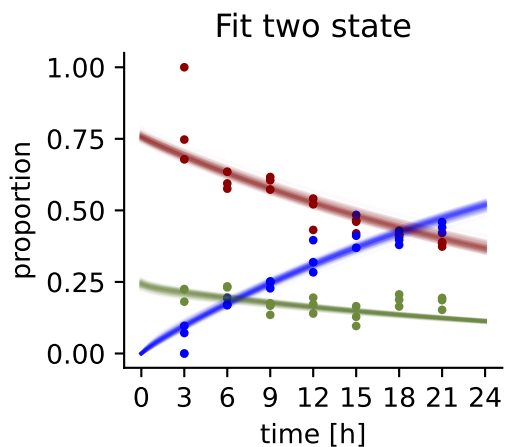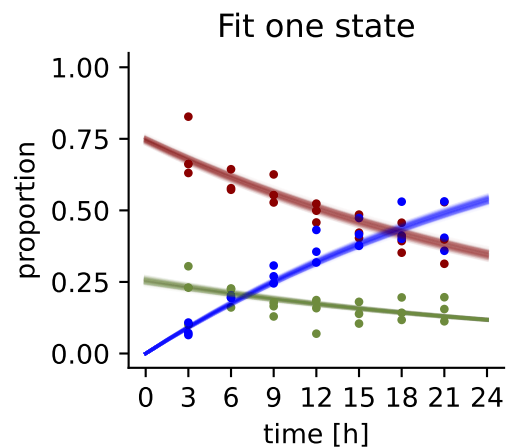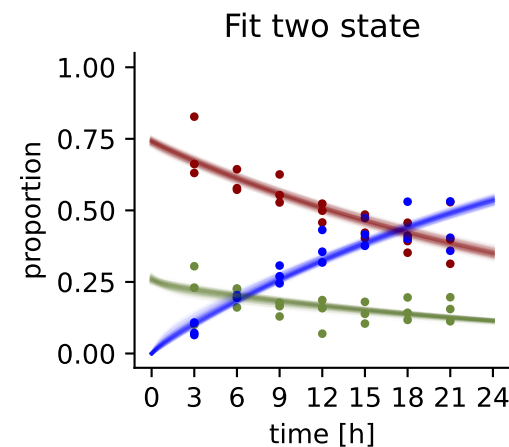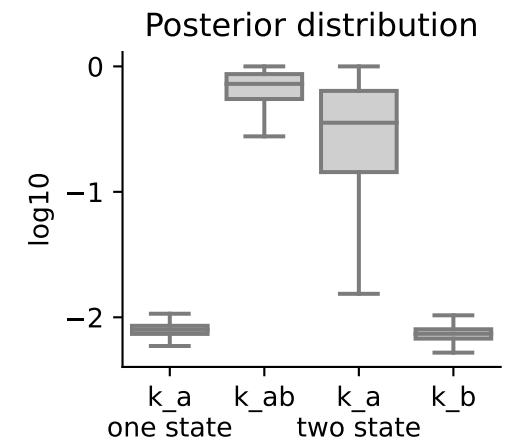

|                          |          |
|--------------------------|----------|
| p value                  | 6.69E-01 |
| log likelihood one state | 86.405   |
| log likelihood two state | 86.807   |
| rmse one state           | 0.338    |
| rmse two state           | 0.341    |
| k_a one state            | 0.008    |
| k_ab                     | 0.726    |
| k_a two state            | 0.356    |
| k_b                      | 0.007    |
| sigma one state          | 0.063    |
| sigma two state          | 0.063    |

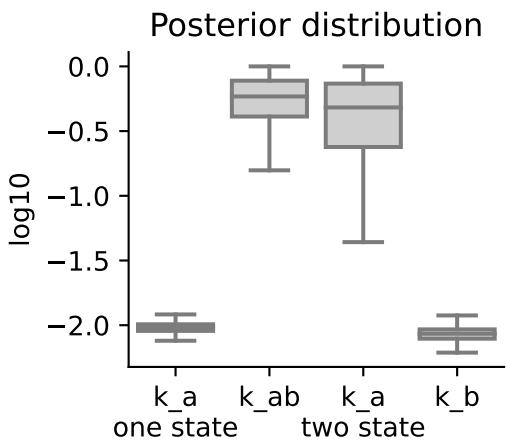

|                          |          |
|--------------------------|----------|
| p value                  | 2.61E-01 |
| log likelihood one state | 92.302   |
| log likelihood two state | 93.645   |
| rmse one state           | 0.341    |
| rmse two state           | 0.324    |
| k_a one state            | 0.01     |
| k_ab                     | 0.586    |
| k_a two state            | 0.482    |
| k_b                      | 0.009    |
| sigma one state          | 0.057    |
| sigma two state          | 0.056    |

uS15m  
MRPS15  
P82914  
28S ribosomal protein S15, mitochondrial

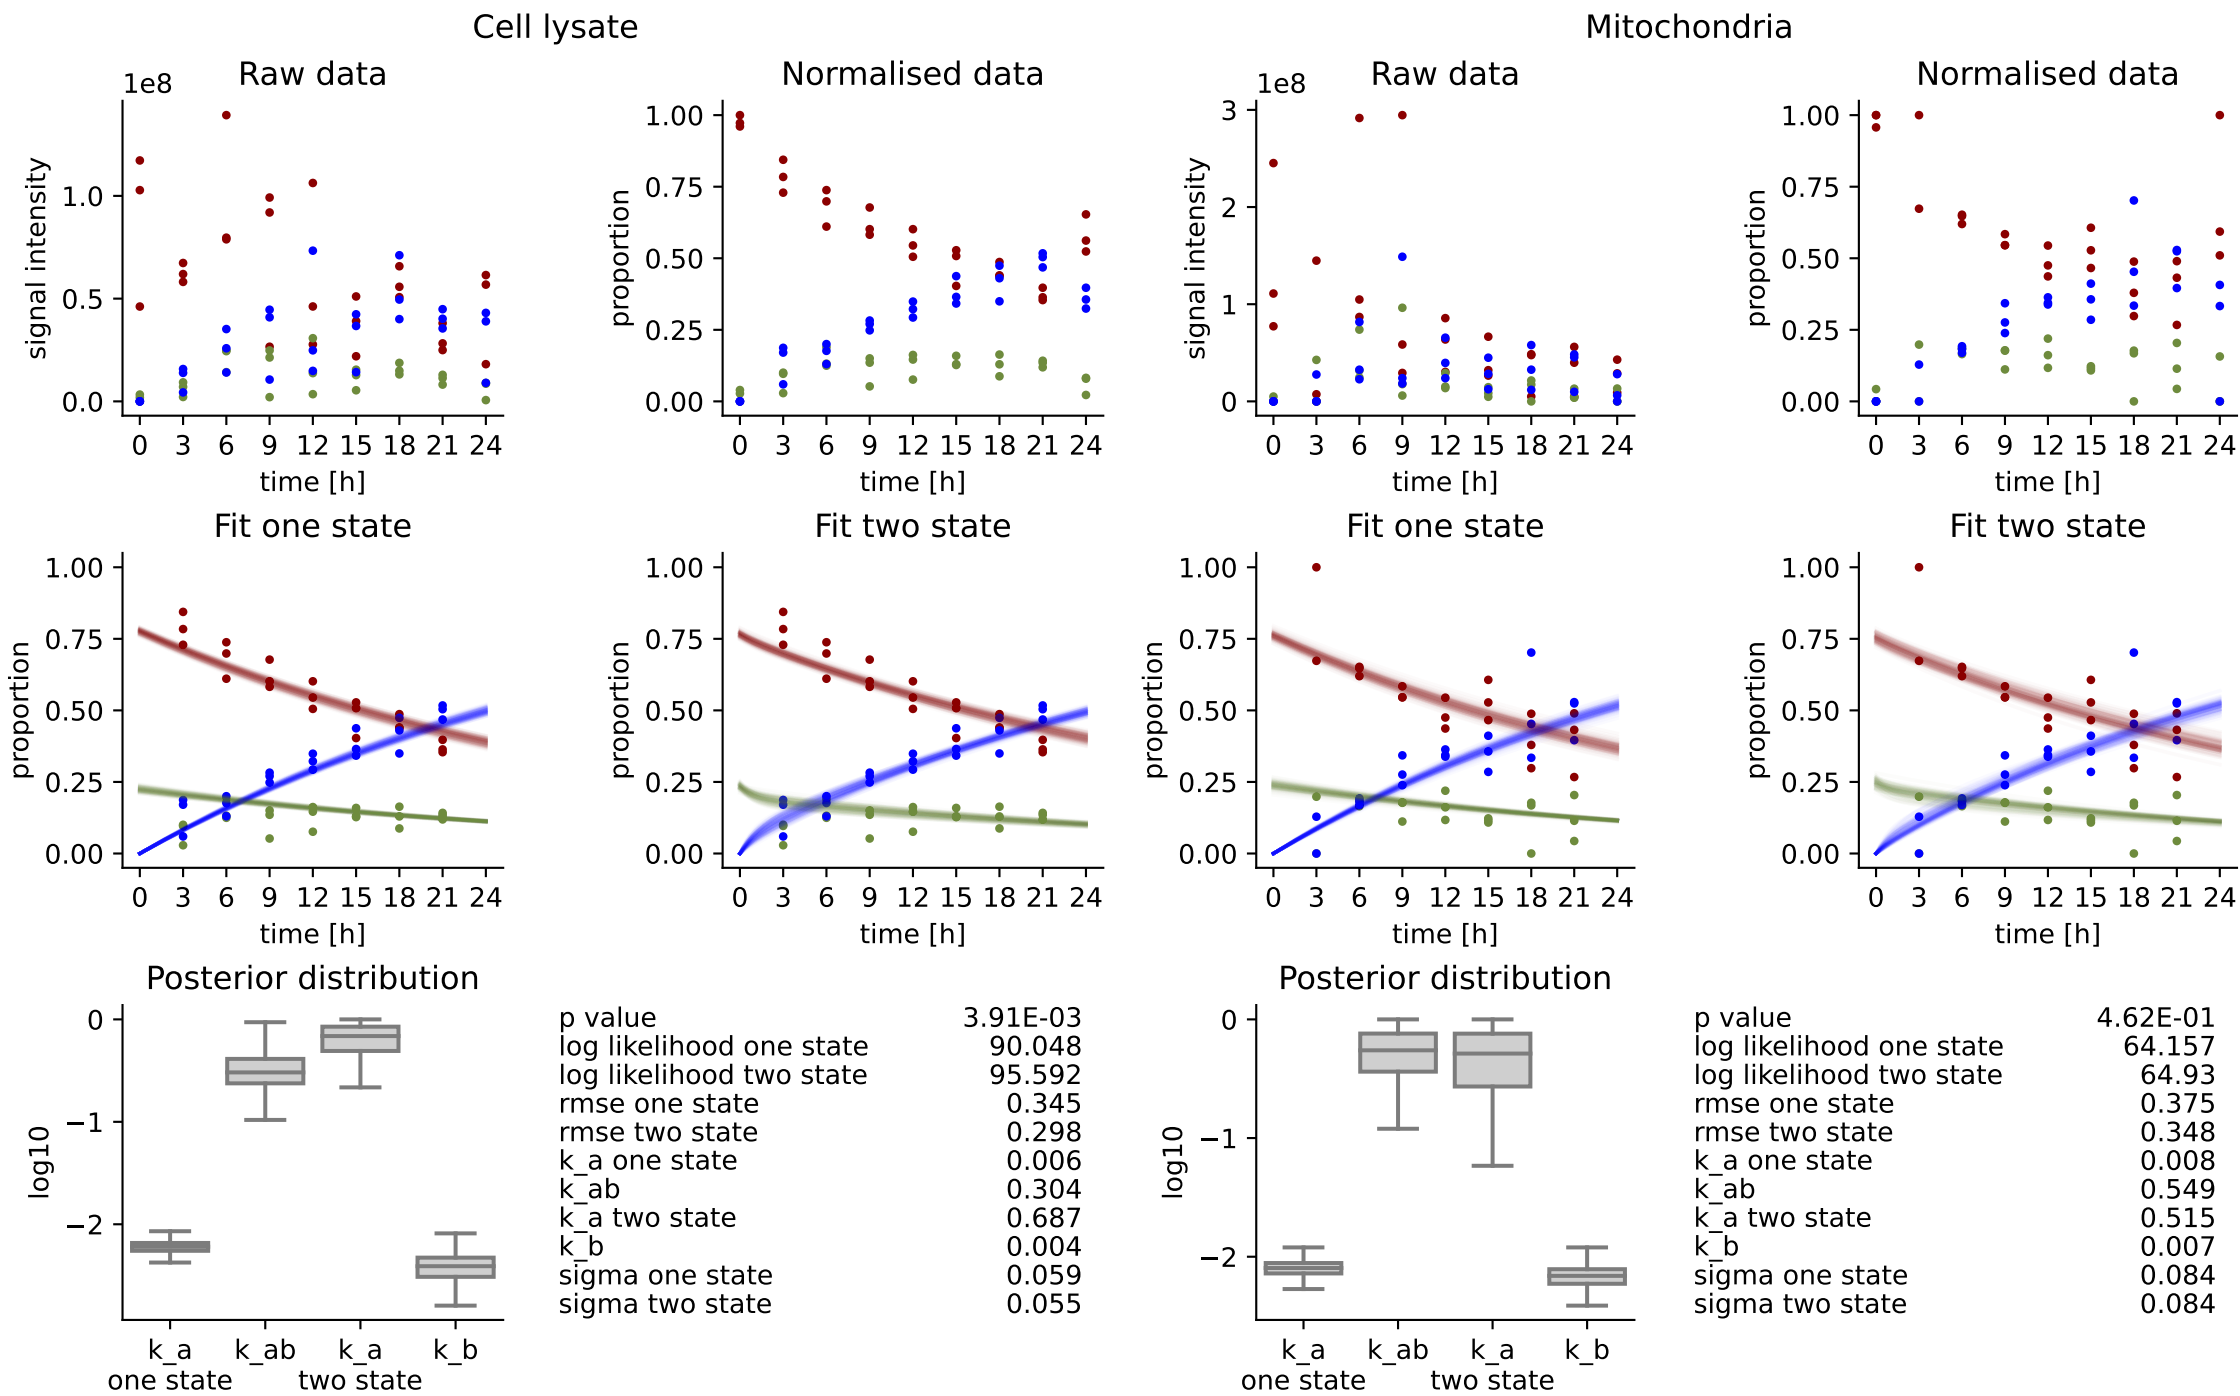

bS16m  
MRPS16  
Q9Y3D3  
28S ribosomal protein S16, mitochondrial

Cell lysate

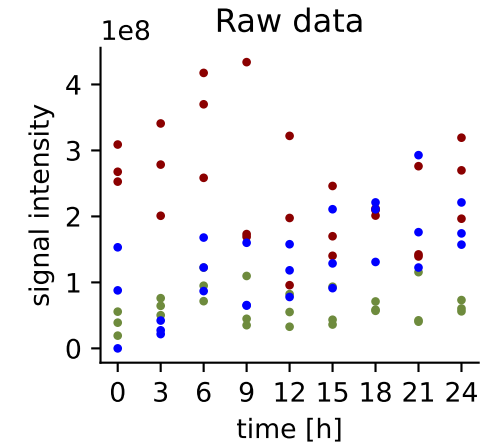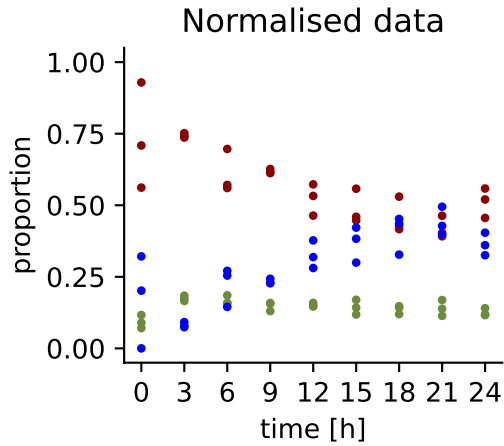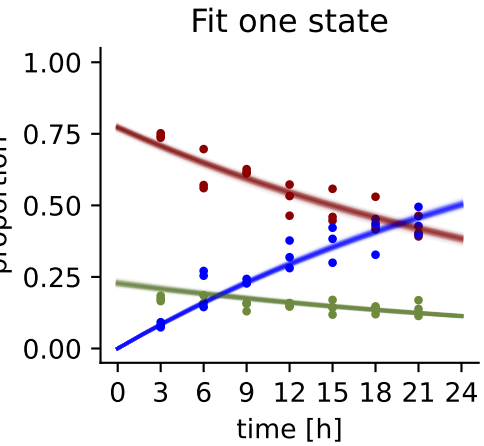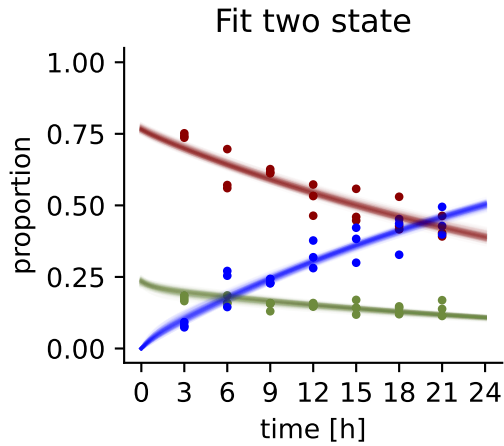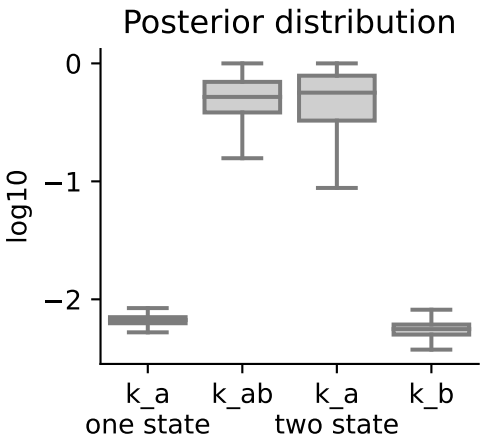

|                          |          |
|--------------------------|----------|
| p value                  | 7.59E-02 |
| log likelihood one state | 109.624  |
| log likelihood two state | 112.202  |
| rmse one state           | 0.318    |
| rmse two state           | 0.295    |
| k_a one state            | 0.007    |
| k_ab                     | 0.52     |
| k_a two state            | 0.565    |
| k_b                      | 0.006    |
| sigma one state          | 0.043    |
| sigma two state          | 0.042    |

Mitochondria

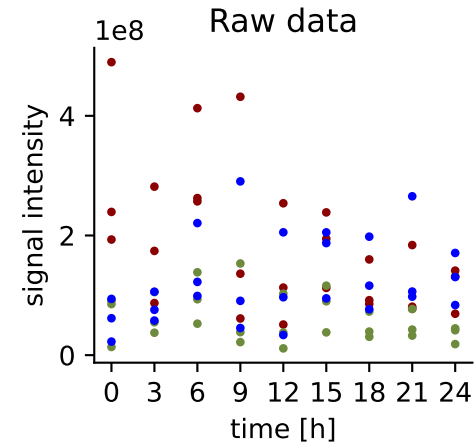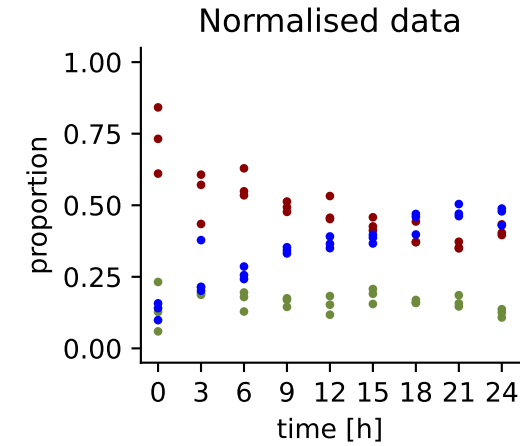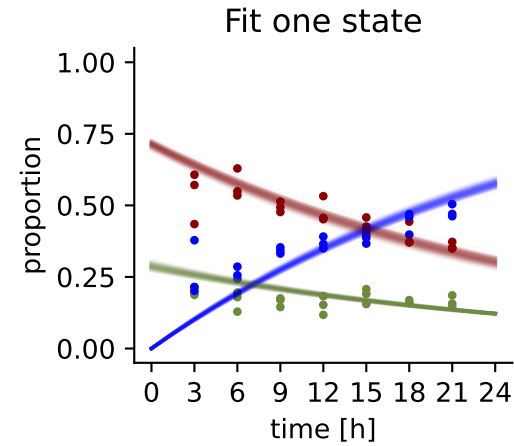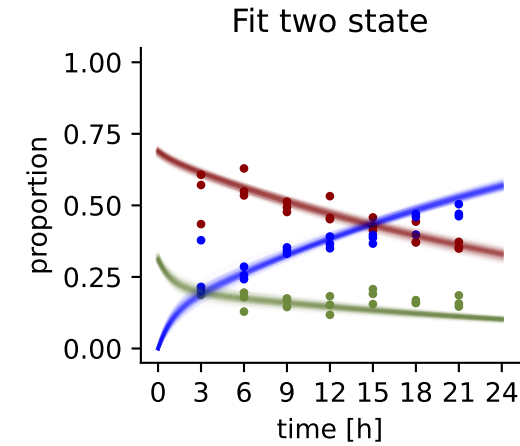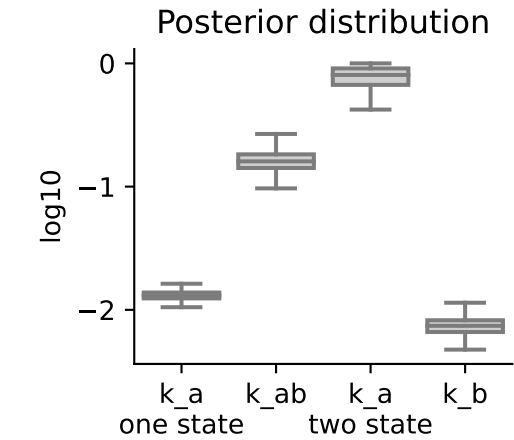

|                          |          |
|--------------------------|----------|
| p value                  | 4.49E-09 |
| log likelihood one state | 83.437   |
| log likelihood two state | 102.658  |
| rmse one state           | 0.348    |
| rmse two state           | 0.25     |
| k_a one state            | 0.013    |
| k_ab                     | 0.16     |
| k_a two state            | 0.806    |
| k_b                      | 0.007    |
| sigma one state          | 0.066    |
| sigma two state          | 0.049    |

uS17m  
MRPS17  
Q9Y2R5  
28S ribosomal protein S17, mitochondrial

Cell lysate

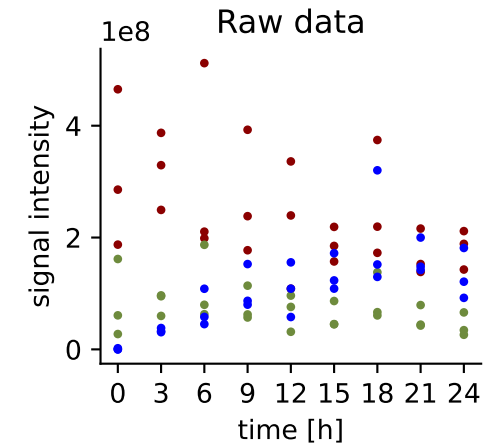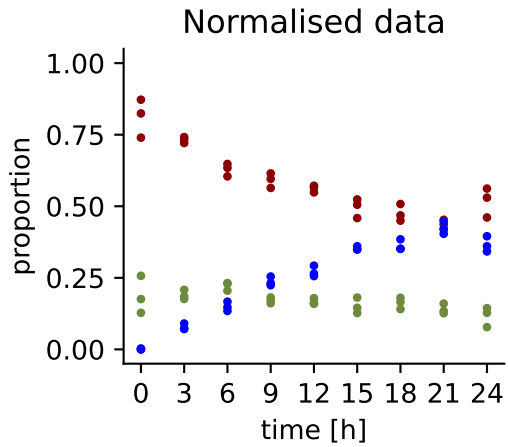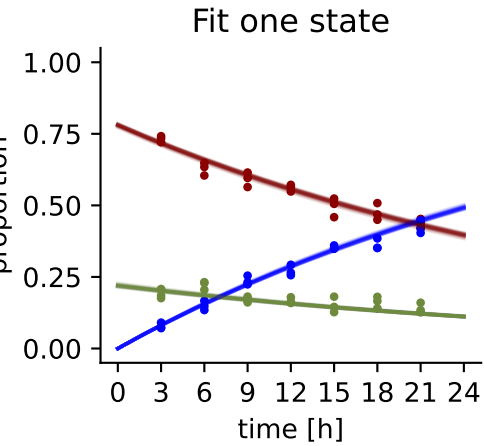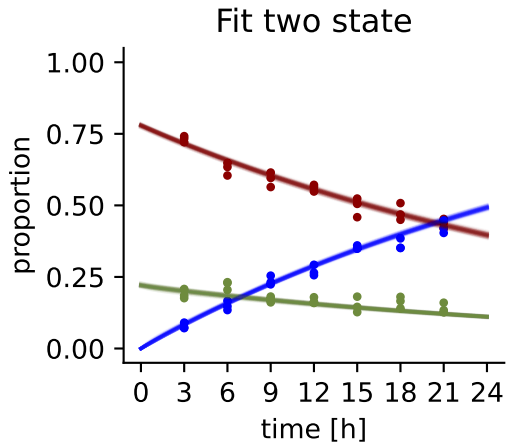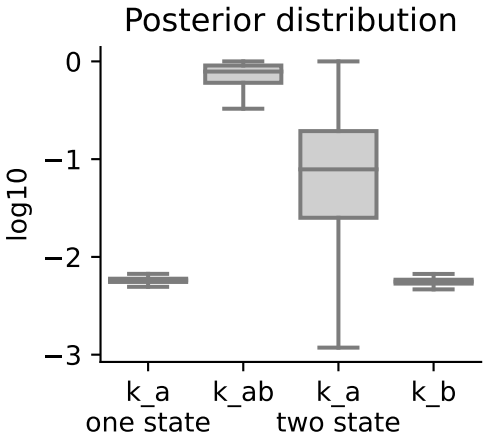

|                          |          |
|--------------------------|----------|
| p value                  | 1.80E-01 |
| log likelihood one state | 145.692  |
| log likelihood two state | 147.405  |
| rmse one state           | 0.289    |
| rmse two state           | 0.292    |
| k_a one state            | 0.006    |
| k_ab                     | 0.787    |
| k_a two state            | 0.079    |
| k_b                      | 0.006    |
| sigma one state          | 0.024    |
| sigma two state          | 0.025    |

Mitochondria

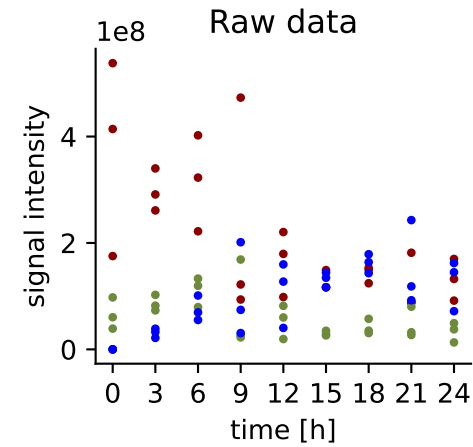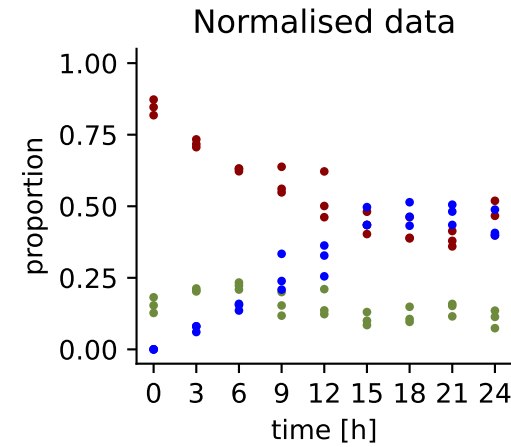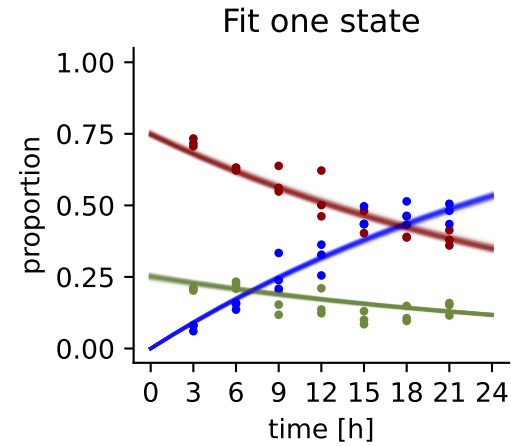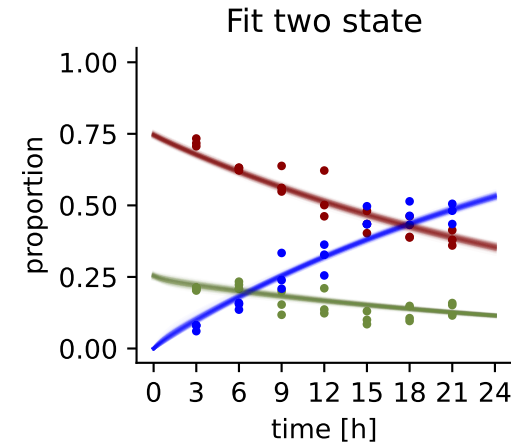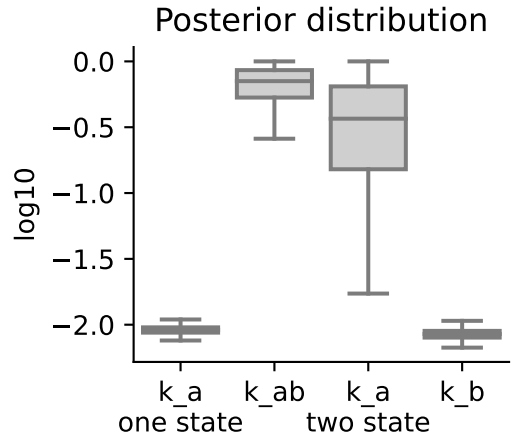

|                          |          |
|--------------------------|----------|
| p value                  | 4.83E-01 |
| log likelihood one state | 109.926  |
| log likelihood two state | 110.654  |
| rmse one state           | 0.344    |
| rmse two state           | 0.337    |
| k_a one state            | 0.009    |
| k_ab                     | 0.708    |
| k_a two state            | 0.367    |
| k_b                      | 0.008    |
| sigma one state          | 0.043    |
| sigma two state          | 0.043    |

bS18m  
MRPS18C  
Q9Y3D5  
28S ribosomal protein S18c, mitochondrial

Cell lysate

Mitochondria

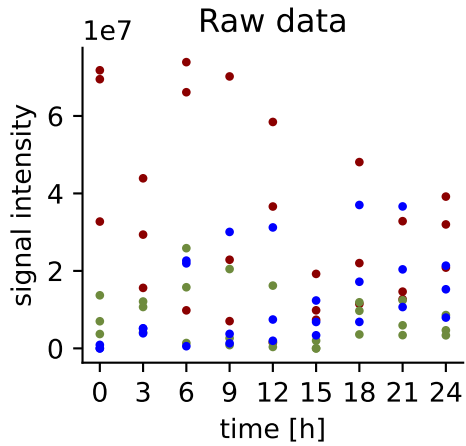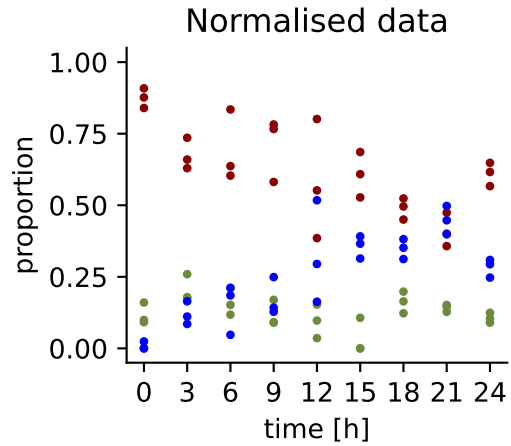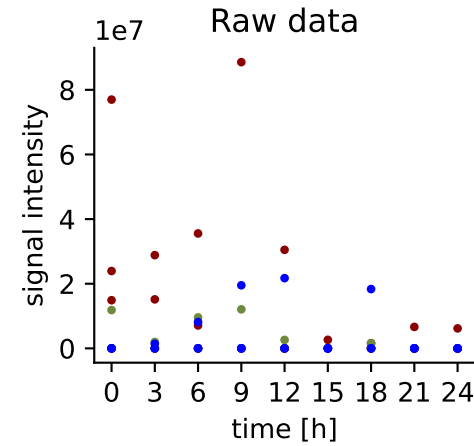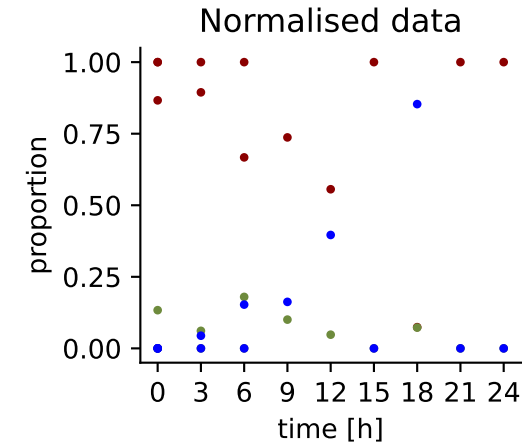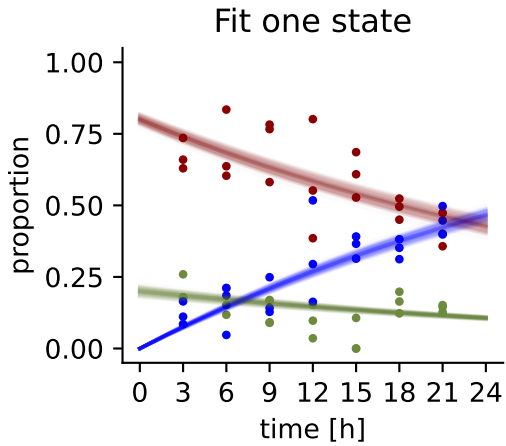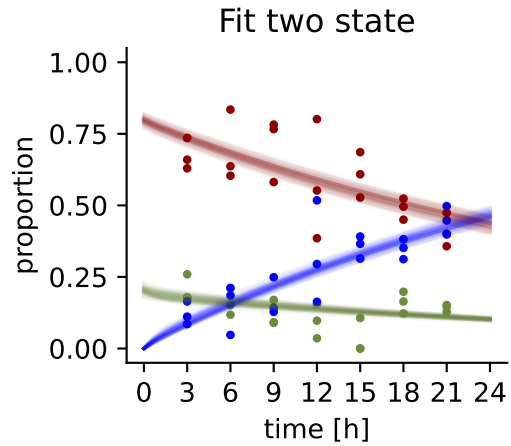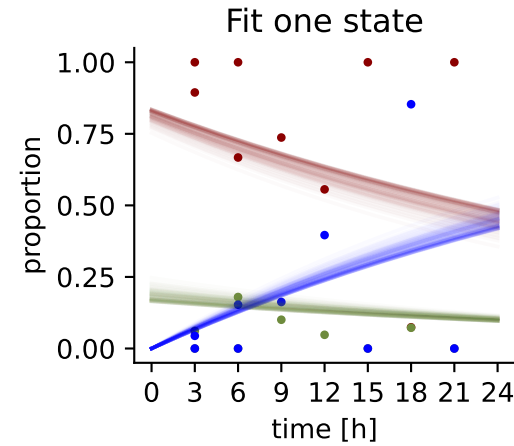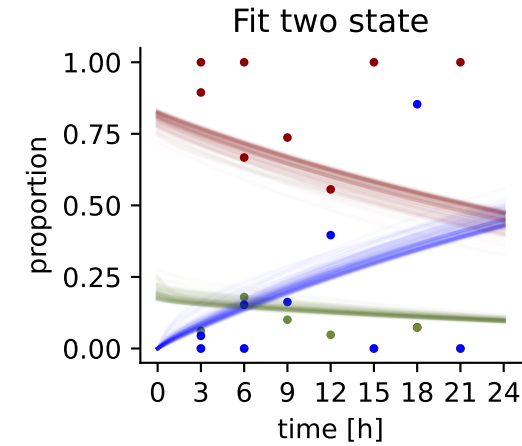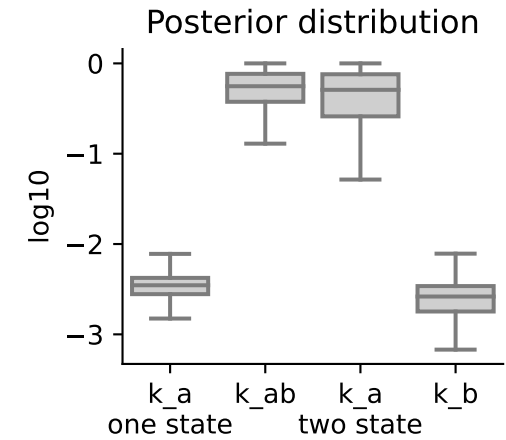

|                          |          |
|--------------------------|----------|
| p value                  | 4.63E-01 |
| log likelihood one state | 67.389   |
| log likelihood two state | 68.16    |
| rmse one state           | 0.324    |
| rmse two state           | 0.307    |
| k_a one state            | 0.003    |
| k_ab                     | 0.559    |
| k_a two state            | 0.51     |
| k_b                      | 0.003    |
| sigma one state          | 0.084    |
| sigma two state          | 0.084    |

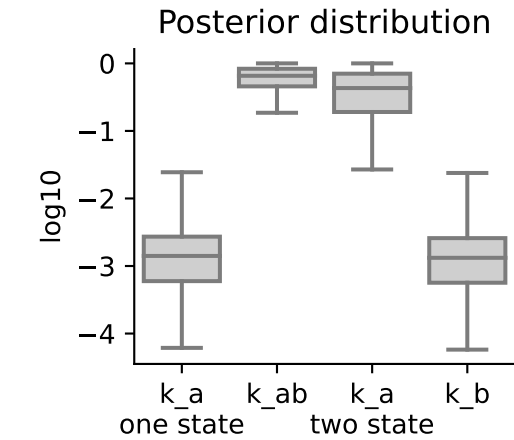

|                          |          |
|--------------------------|----------|
| p value                  | 1.00E+00 |
| log likelihood one state | 1.626    |
| log likelihood two state | 1.612    |
| rmse one state           | 0.429    |
| rmse two state           | 0.429    |
| k_a one state            | 0.001    |
| k_ab                     | 0.655    |
| k_a two state            | 0.431    |
| k_b                      | 0.001    |
| sigma one state          | 0.221    |
| sigma two state          | 0.223    |

bS21m  
MRPS21  
P82921  
28S ribosomal protein S21, mitochondrial

Cell lysate

Mitochondria

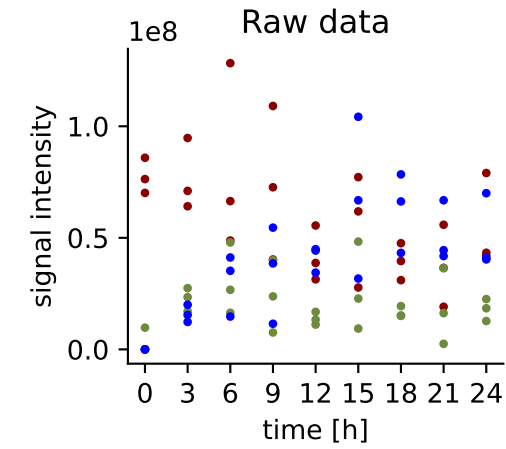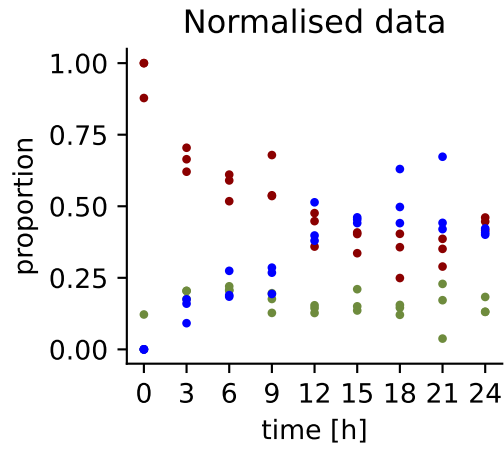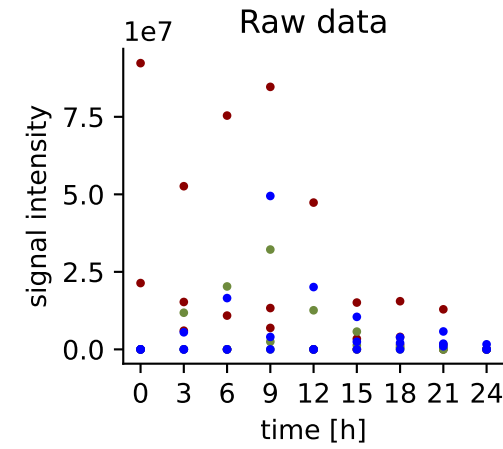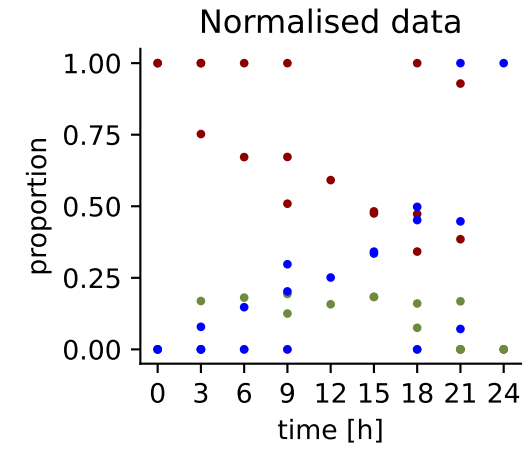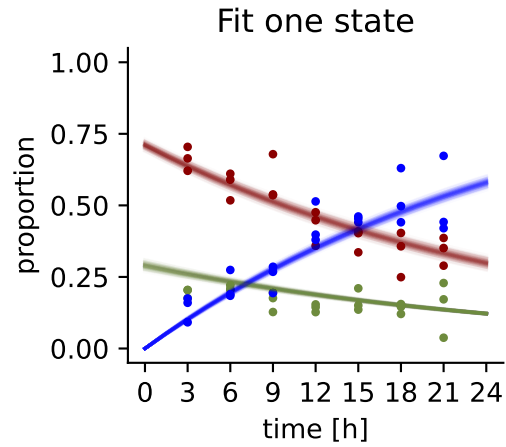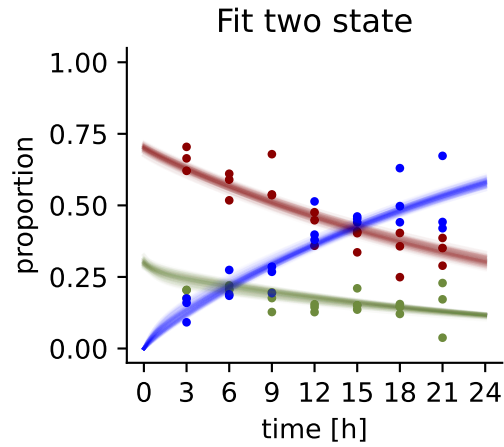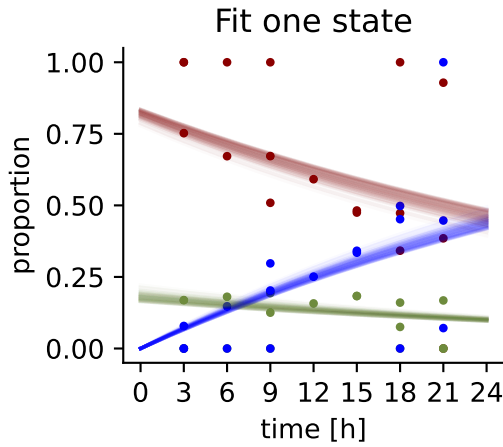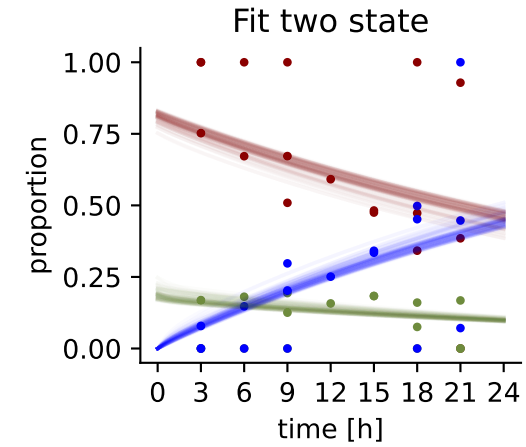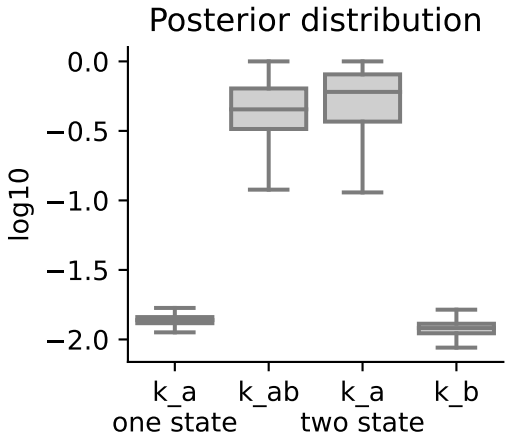

|                          |          |
|--------------------------|----------|
| p value                  | 6.58E-02 |
| log likelihood one state | 84.694   |
| log likelihood two state | 87.415   |
| rmse one state           | 0.381    |
| rmse two state           | 0.342    |
| k_a one state            | 0.014    |
| k_ab                     | 0.452    |
| k_a two state            | 0.603    |
| k_b                      | 0.012    |
| sigma one state          | 0.064    |
| sigma two state          | 0.062    |

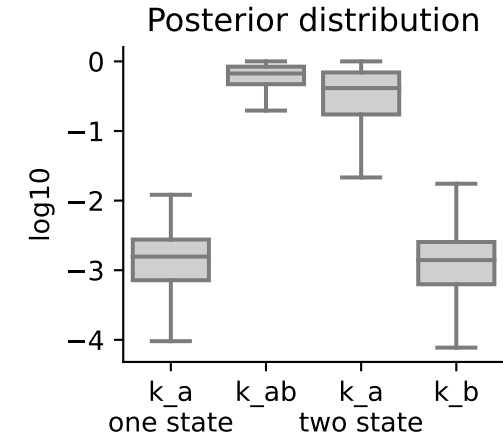

|                          |          |
|--------------------------|----------|
| p value                  | 1.00E+00 |
| log likelihood one state | 11.559   |
| log likelihood two state | 11.552   |
| rmse one state           | 0.451    |
| rmse two state           | 0.45     |
| k_a one state            | 0.002    |
| k_ab                     | 0.67     |
| k_a two state            | 0.413    |
| k_b                      | 0.001    |
| sigma one state          | 0.191    |
| sigma two state          | 0.192    |



mS22  
MRPS22  
P82650  
28S ribosomal protein S22, mitochondrial

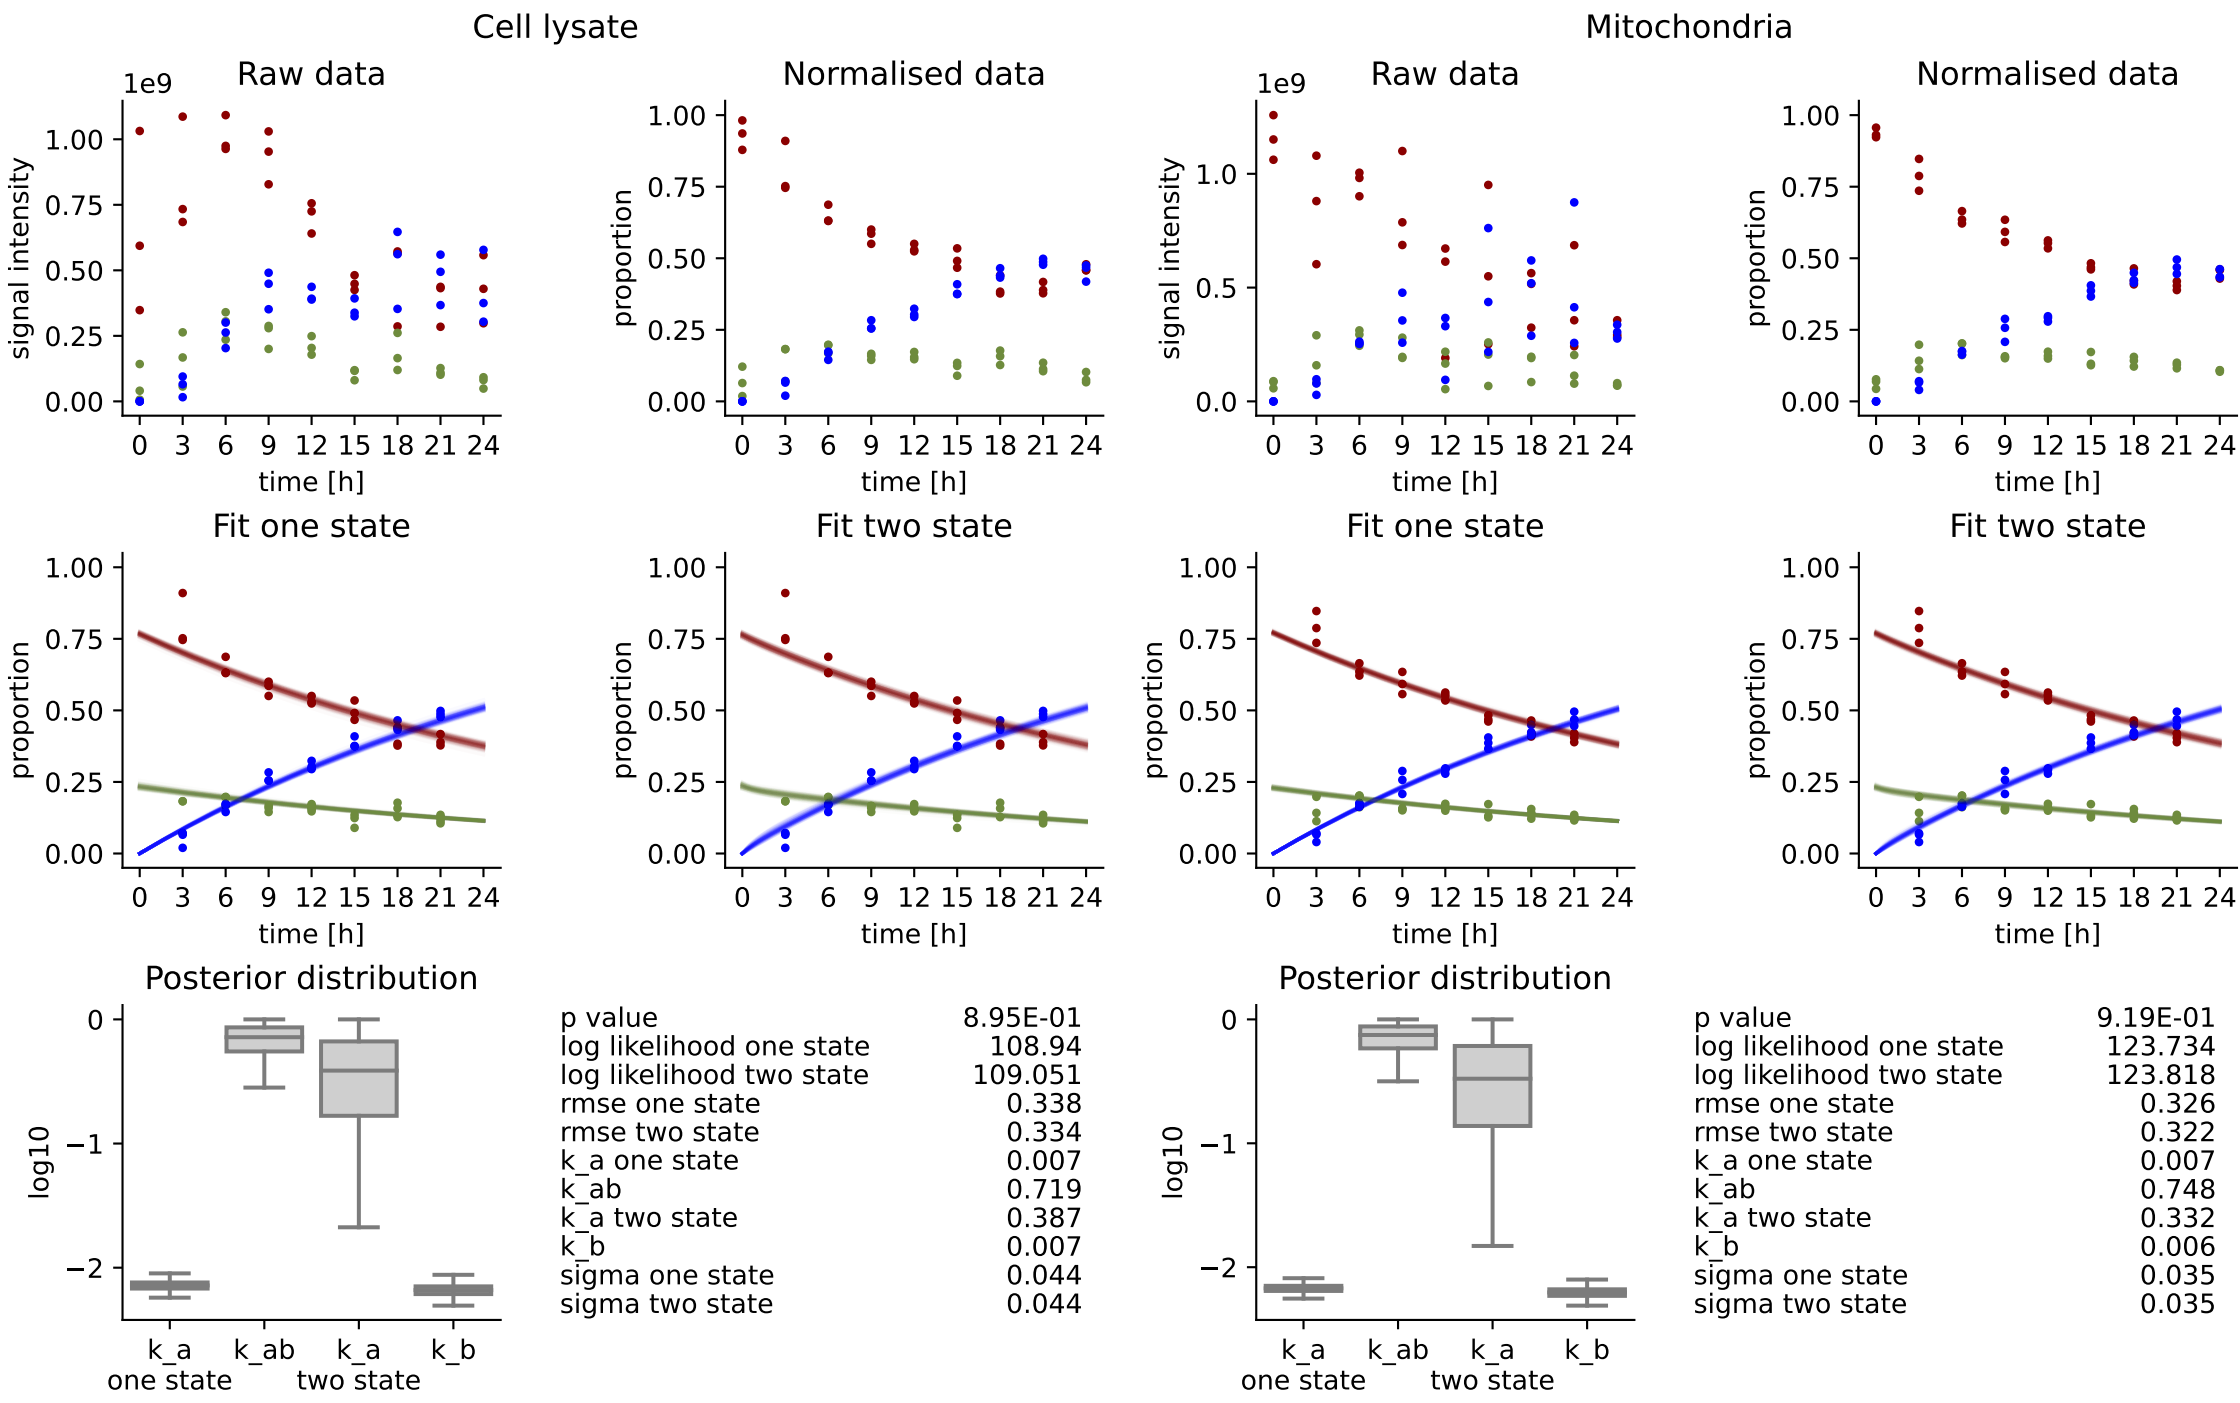

mS23  
MRPS23  
Q9Y3D9  
28S ribosomal protein S23, mitochondrial

Cell lysate

Mitochondria

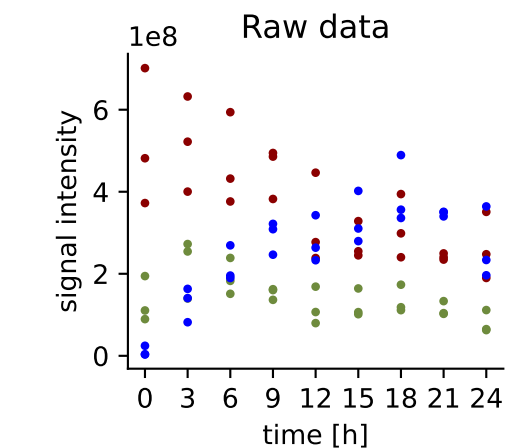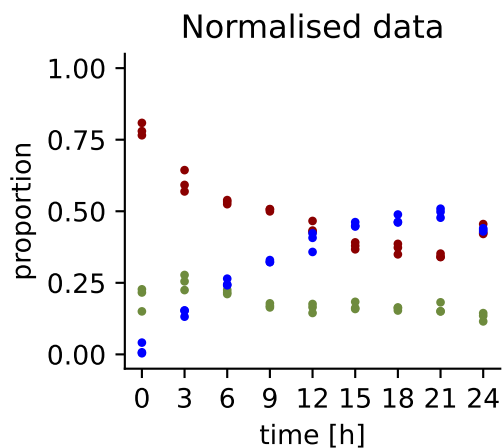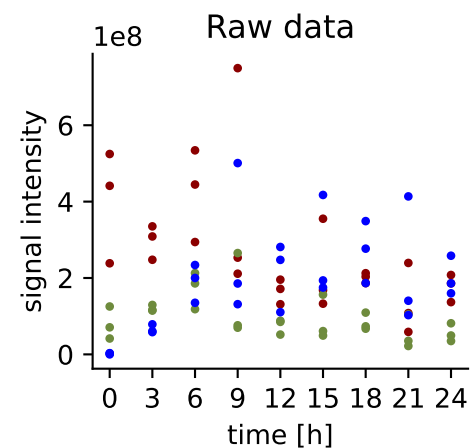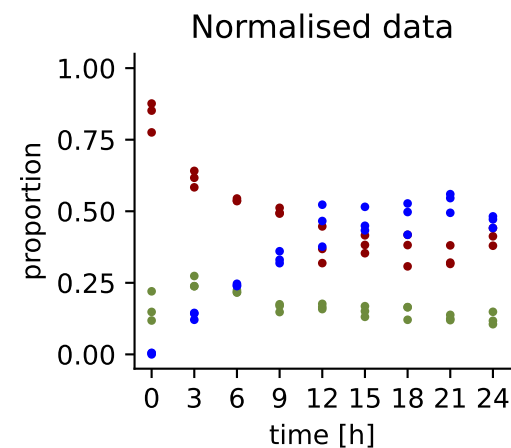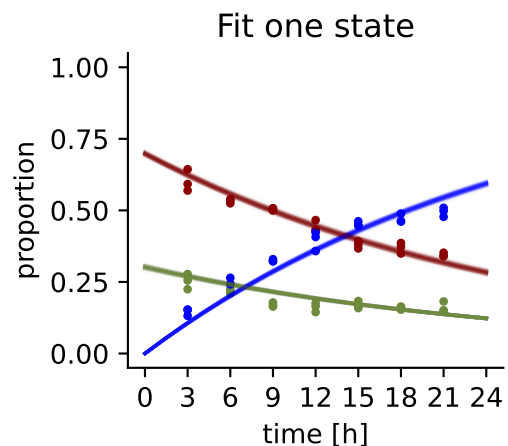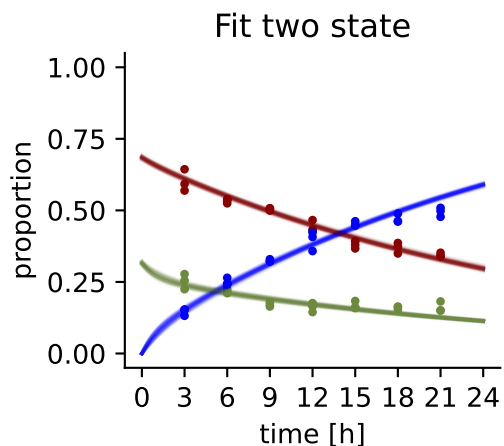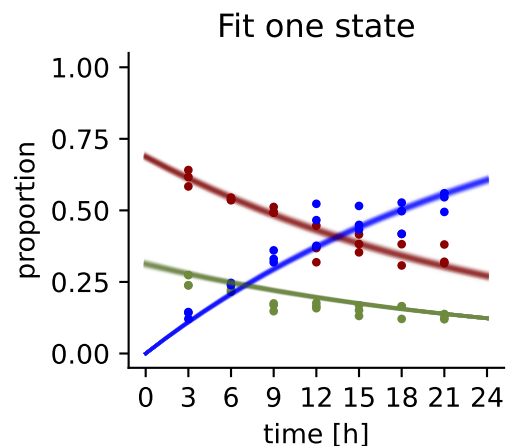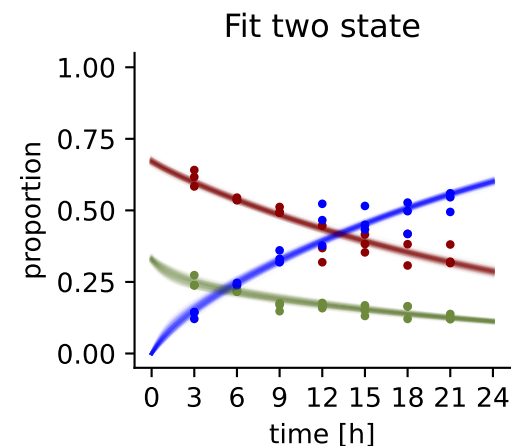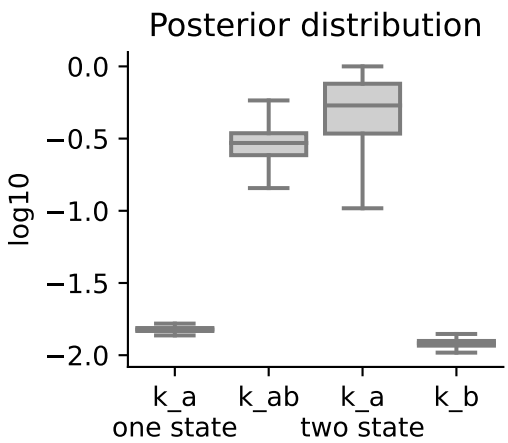

|                          |          |
|--------------------------|----------|
| p value                  | 1.00E-08 |
| log likelihood one state | 128.415  |
| log likelihood two state | 146.835  |
| rmse one state           | 0.354    |
| rmse two state           | 0.312    |
| k_a one state            | 0.015    |
| k_ab                     | 0.295    |
| k_a two state            | 0.536    |
| k_b                      | 0.012    |
| sigma one state          | 0.032    |
| sigma two state          | 0.024    |

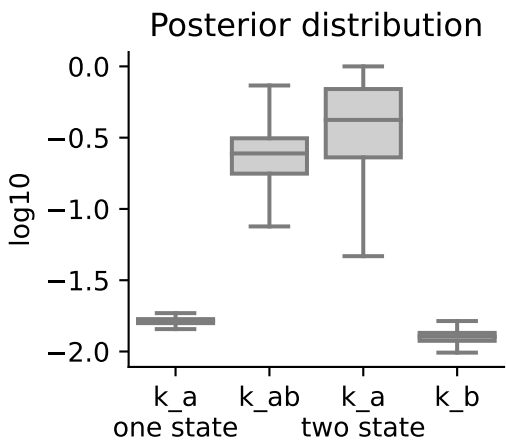

|                          |          |
|--------------------------|----------|
| p value                  | 3.45E-06 |
| log likelihood one state | 107.808  |
| log likelihood two state | 120.384  |
| rmse one state           | 0.376    |
| rmse two state           | 0.335    |
| k_a one state            | 0.016    |
| k_ab                     | 0.245    |
| k_a two state            | 0.421    |
| k_b                      | 0.013    |
| sigma one state          | 0.045    |
| sigma two state          | 0.038    |

mS25  
MRPS25  
P82663  
28S ribosomal protein S25, mitochondrial

Cell lysate

Mitochondria

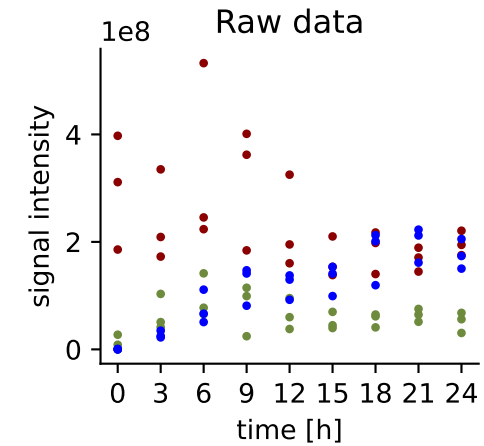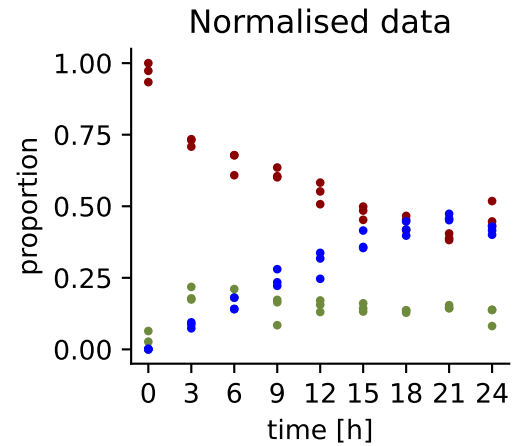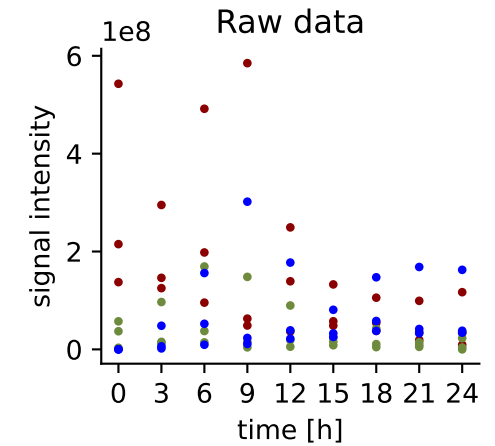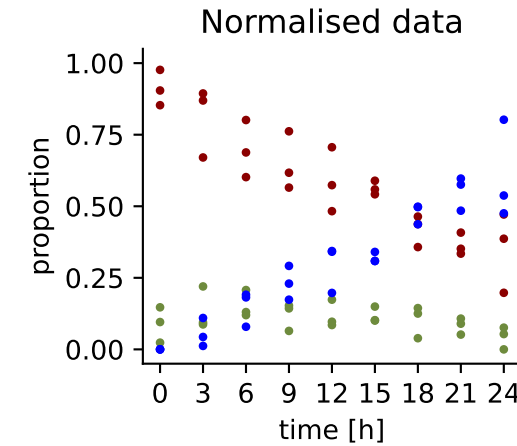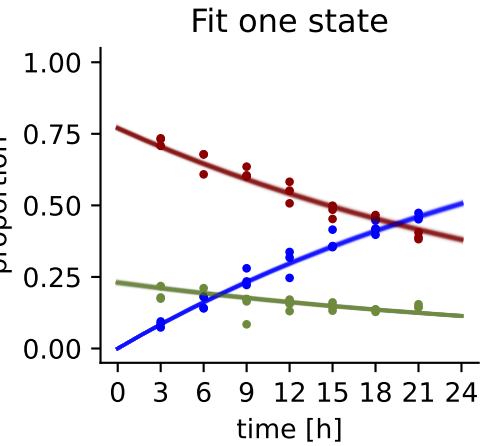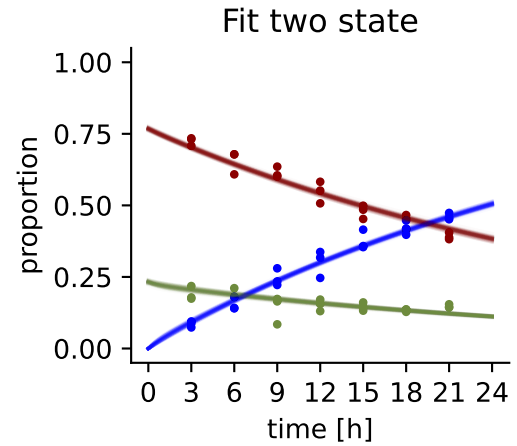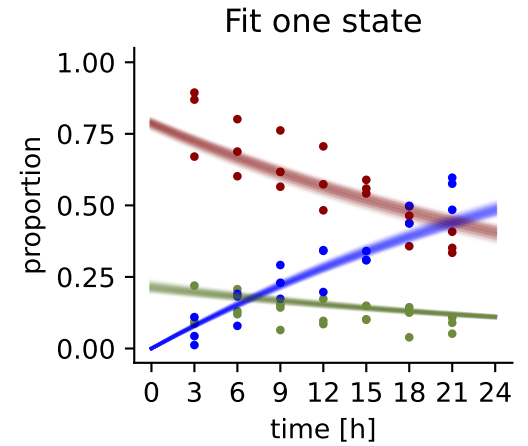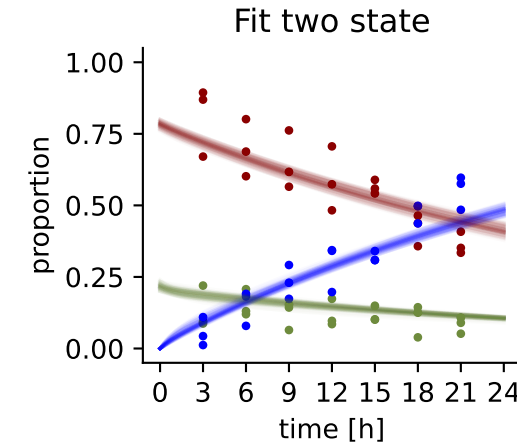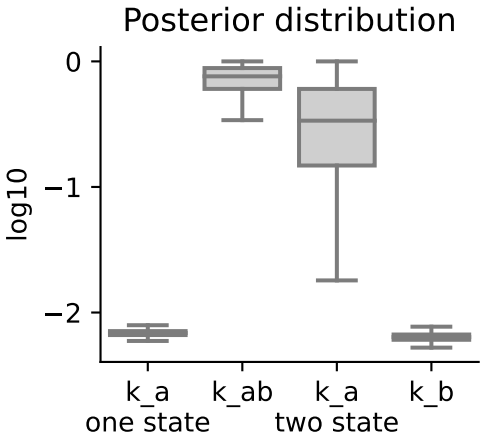

|                          |          |
|--------------------------|----------|
| p value                  | 7.42E-01 |
| log likelihood one state | 139.066  |
| log likelihood two state | 139.365  |
| rmse one state           | 0.317    |
| rmse two state           | 0.311    |
| k_a one state            | 0.007    |
| k_ab                     | 0.76     |
| k_a two state            | 0.337    |
| k_b                      | 0.006    |
| sigma one state          | 0.027    |
| sigma two state          | 0.027    |

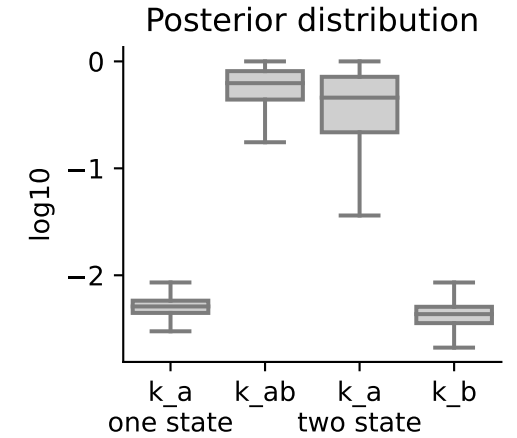

|                          |          |
|--------------------------|----------|
| p value                  | 7.18E-01 |
| log likelihood one state | 74.585   |
| log likelihood two state | 74.916   |
| rmse one state           | 0.359    |
| rmse two state           | 0.35     |
| k_a one state            | 0.005    |
| k_ab                     | 0.626    |
| k_a two state            | 0.458    |
| k_b                      | 0.004    |
| sigma one state          | 0.075    |
| sigma two state          | 0.075    |

mS26  
MRPS26  
Q9BYN8  
28S ribosomal protein S26, mitochondrial

Cell lysate

Mitochondria

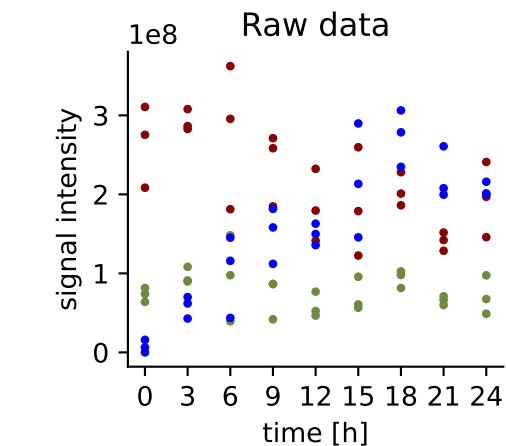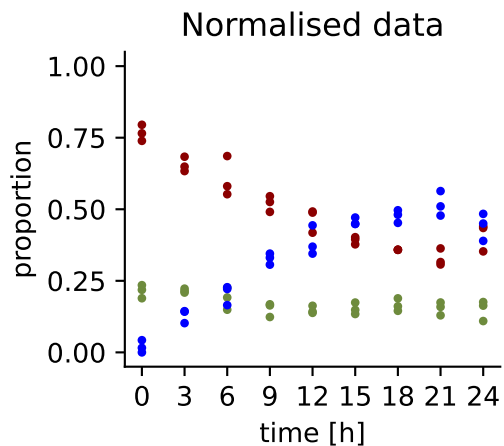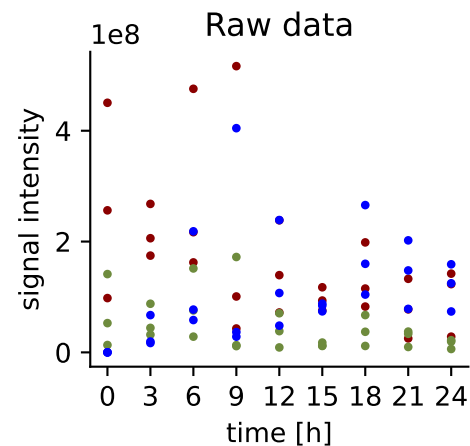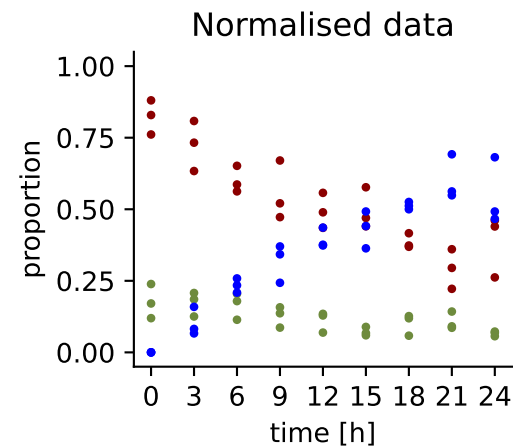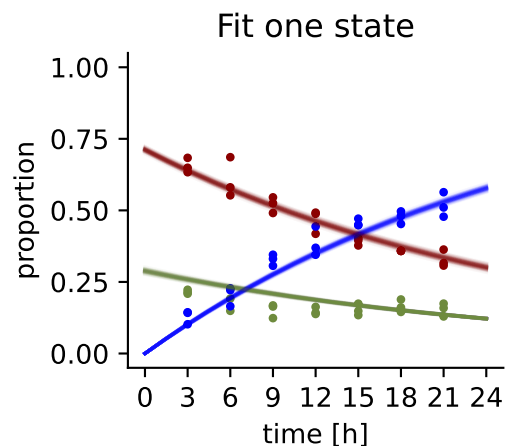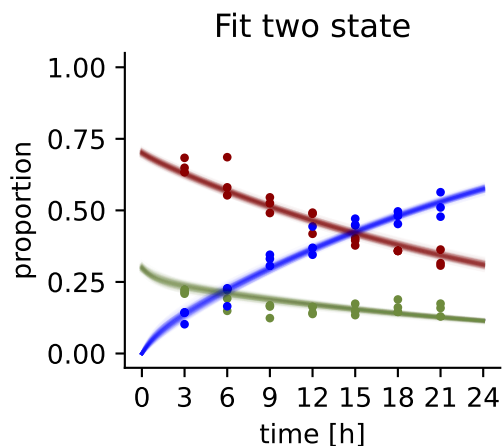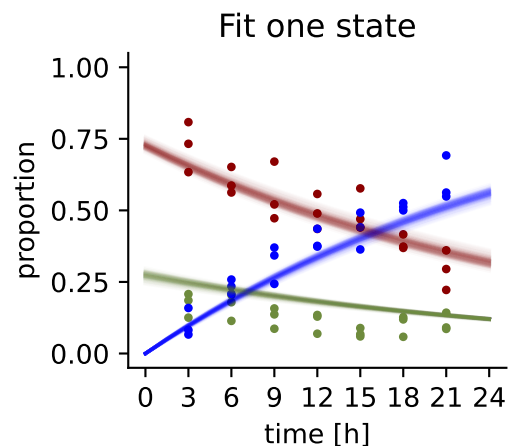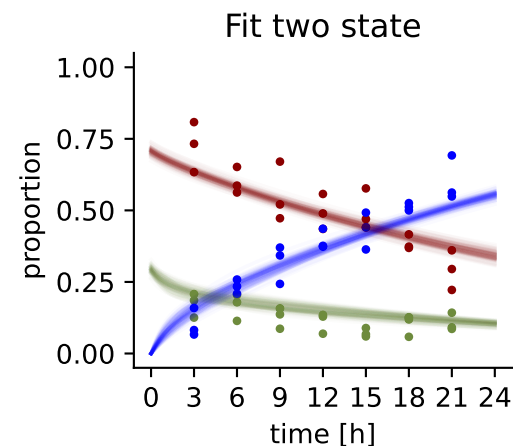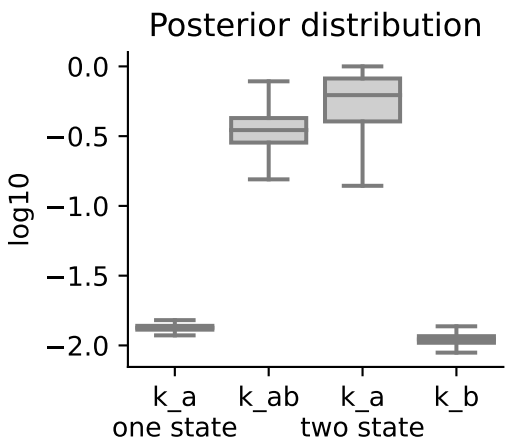

|                          |          |
|--------------------------|----------|
| p value                  | 2.00E-04 |
| log likelihood one state | 115.37   |
| log likelihood two state | 123.89   |
| rmse one state           | 0.366    |
| rmse two state           | 0.328    |
| k_a one state            | 0.013    |
| k_ab                     | 0.349    |
| k_a two state            | 0.622    |
| k_b                      | 0.011    |
| sigma one state          | 0.04     |
| sigma two state          | 0.035    |

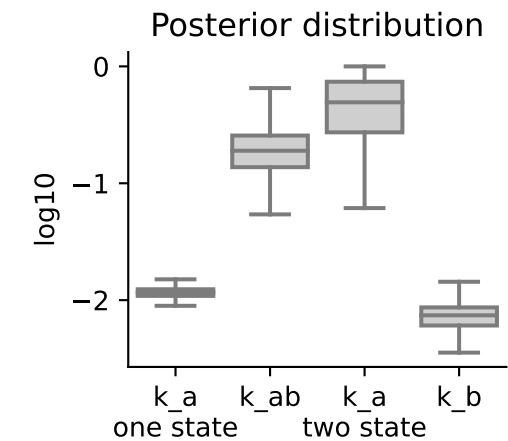

|                          |          |
|--------------------------|----------|
| p value                  | 2.51E-04 |
| log likelihood one state | 77.176   |
| log likelihood two state | 85.466   |
| rmse one state           | 0.401    |
| rmse two state           | 0.355    |
| k_a one state            | 0.012    |
| k_ab                     | 0.19     |
| k_a two state            | 0.493    |
| k_b                      | 0.007    |
| sigma one state          | 0.072    |
| sigma two state          | 0.065    |

mS27  
MRPS27  
Q92552  
28S ribosomal protein S27, mitochondrial

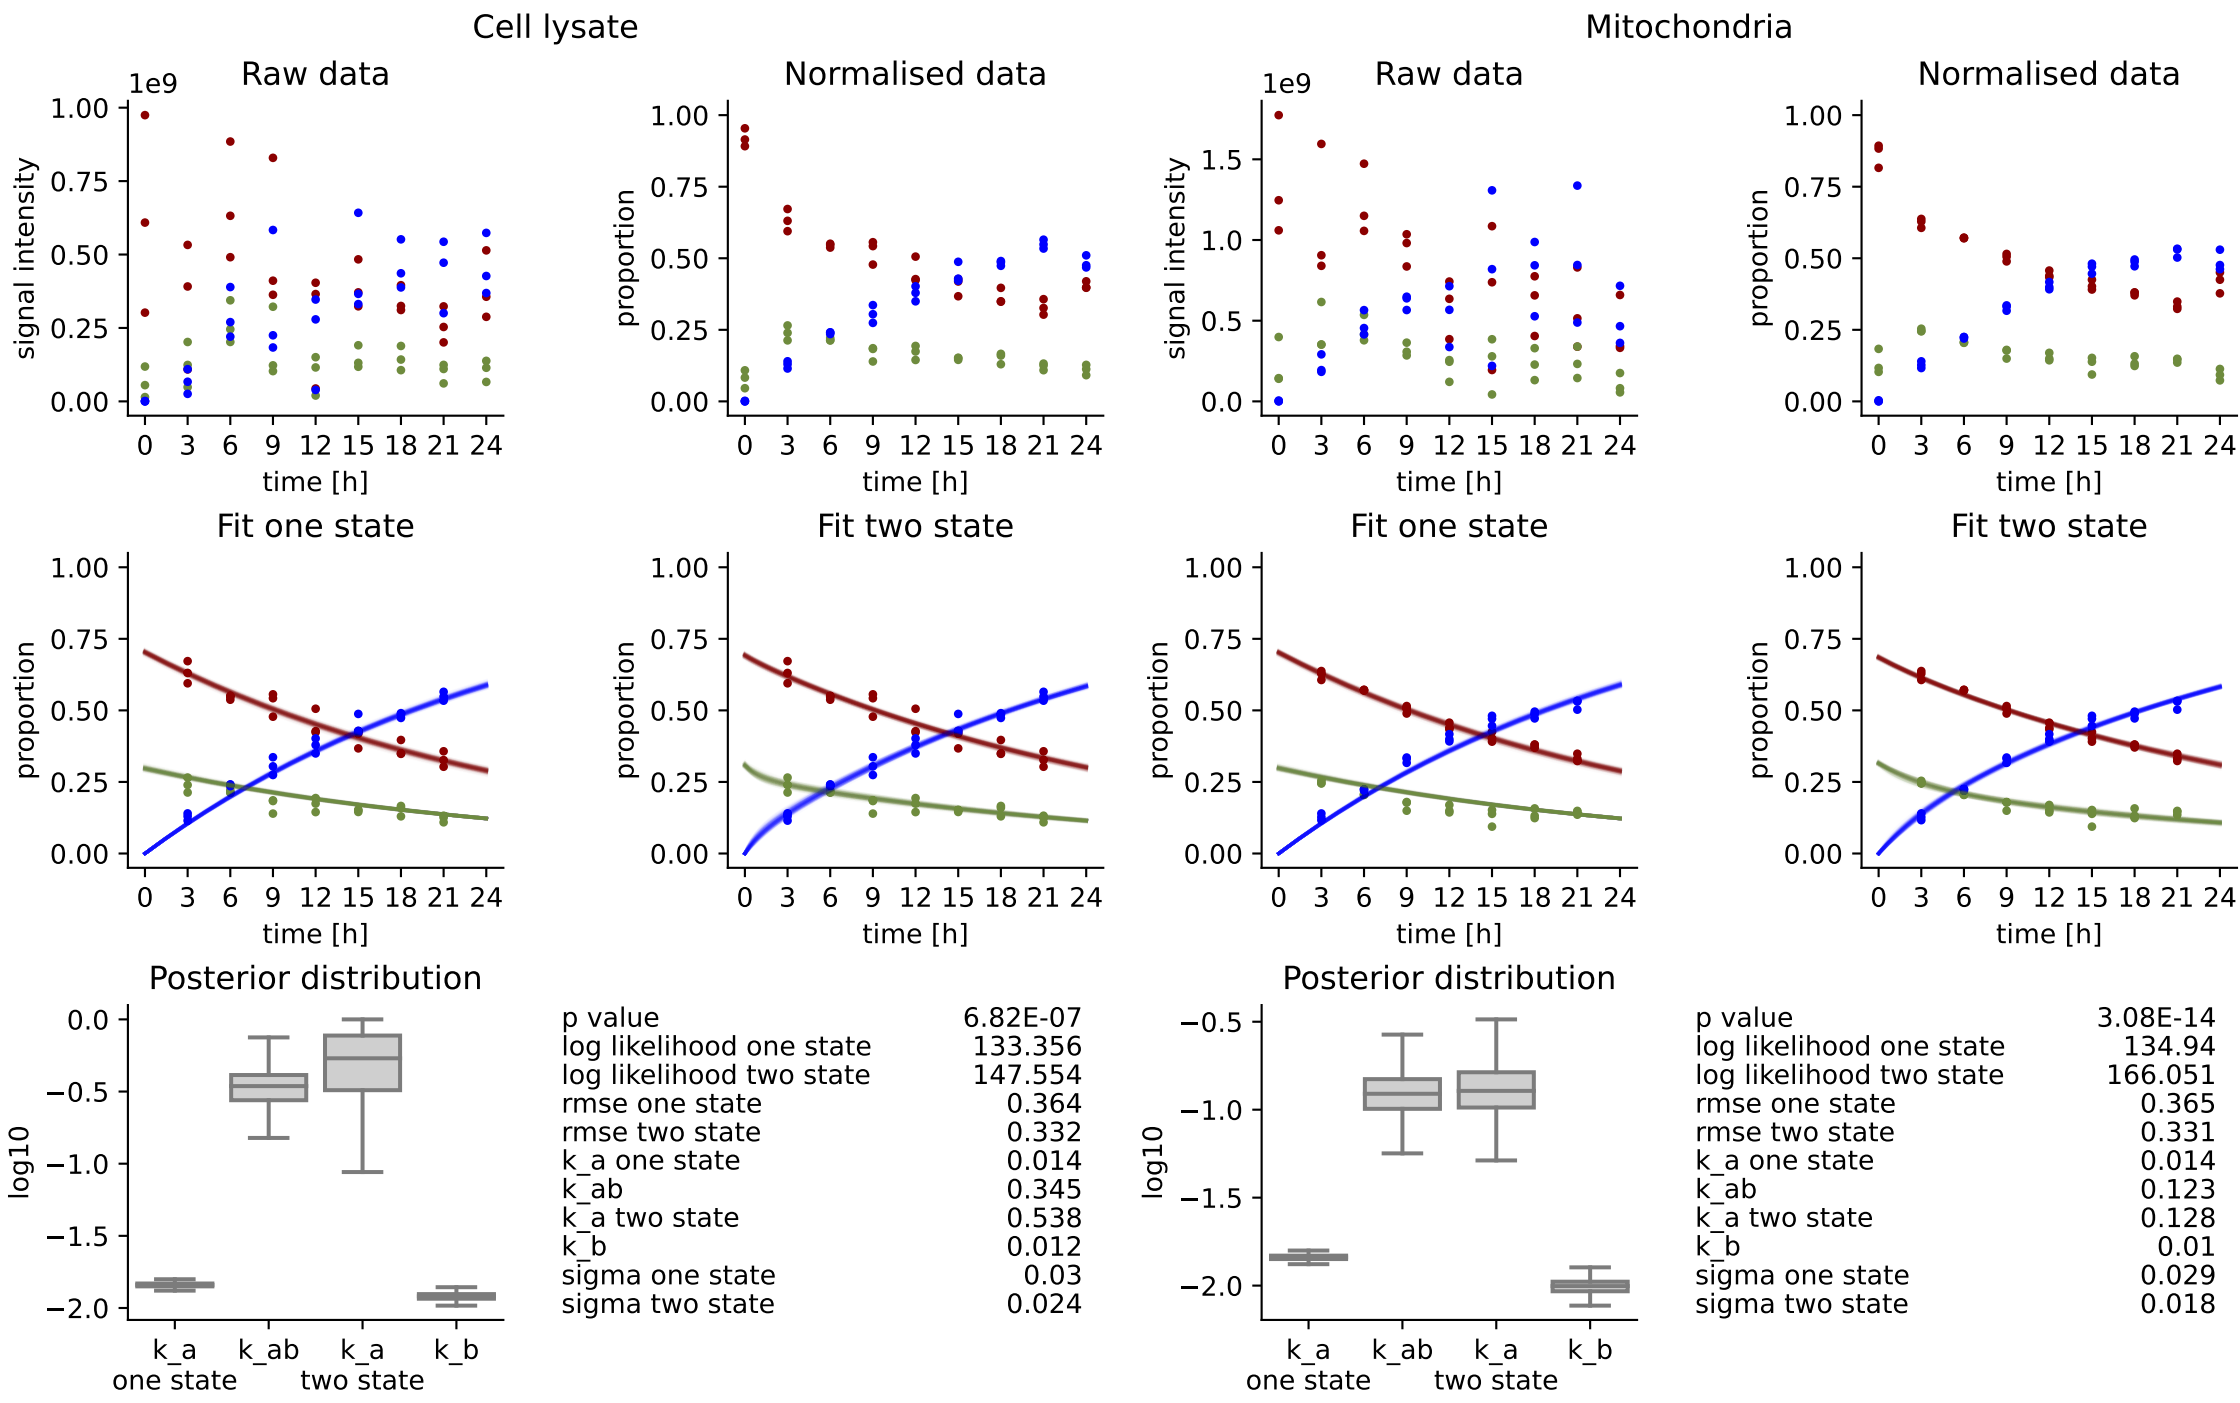

mS29  
DAP3  
P51398  
28S ribosomal protein S29, mitochondrial

Cell lysate

Mitochondria

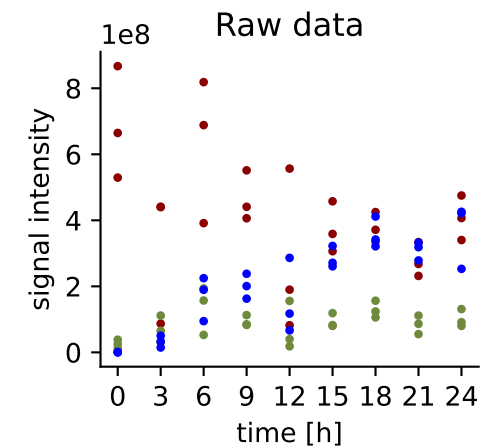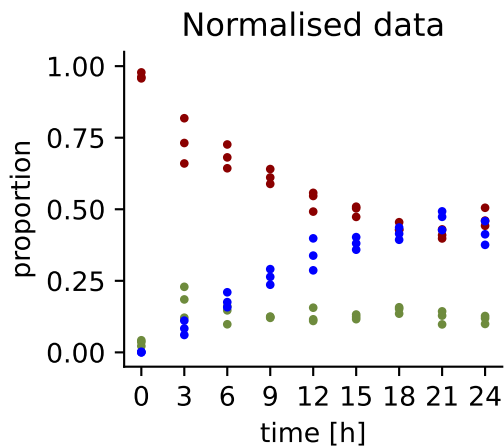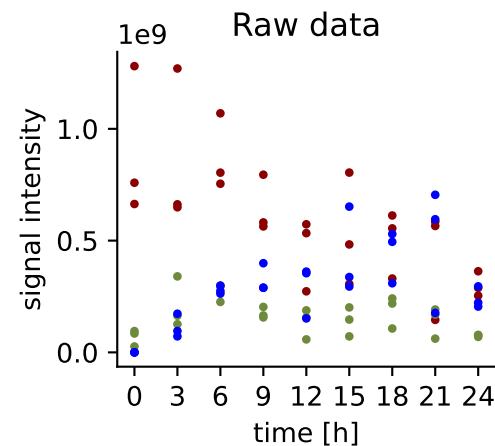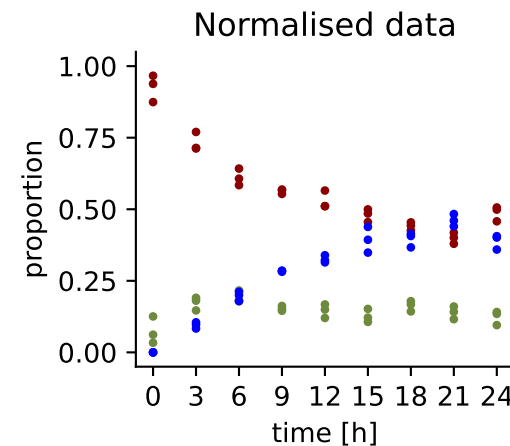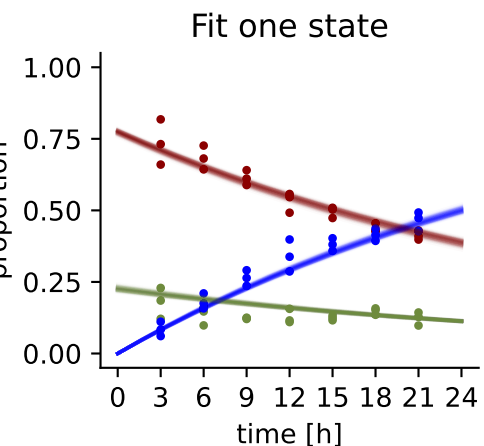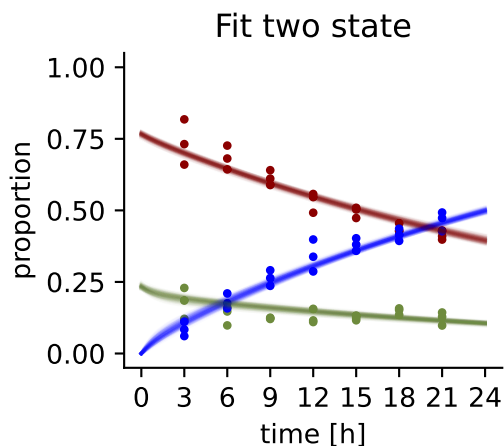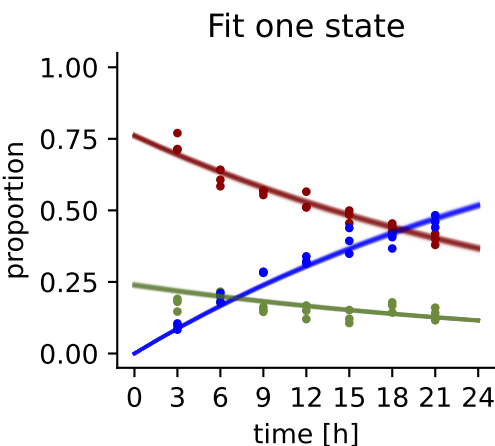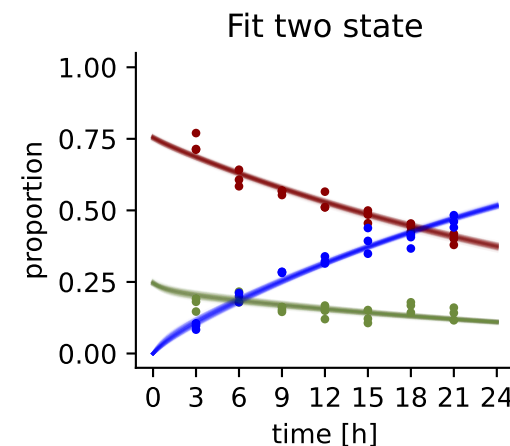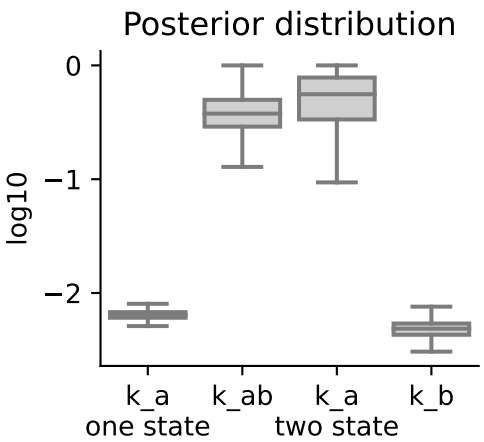

|                          |          |
|--------------------------|----------|
| p value                  | 3.21E-03 |
| log likelihood one state | 115.19   |
| log likelihood two state | 120.931  |
| rmse one state           | 0.329    |
| rmse two state           | 0.303    |
| k_a one state            | 0.006    |
| k_ab                     | 0.377    |
| k_a two state            | 0.558    |
| k_b                      | 0.005    |
| sigma one state          | 0.04     |
| sigma two state          | 0.037    |

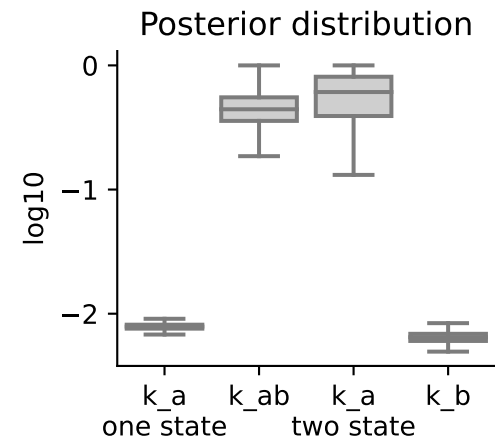

|                          |          |
|--------------------------|----------|
| p value                  | 1.68E-03 |
| log likelihood one state | 131.244  |
| log likelihood two state | 137.632  |
| rmse one state           | 0.322    |
| rmse two state           | 0.296    |
| k_a one state            | 0.008    |
| k_ab                     | 0.443    |
| k_a two state            | 0.61     |
| k_b                      | 0.006    |
| sigma one state          | 0.031    |
| sigma two state          | 0.028    |

mS31  
MRPS31  
Q92665  
28S ribosomal protein S31, mitochondrial

Cell lysate

Mitochondria

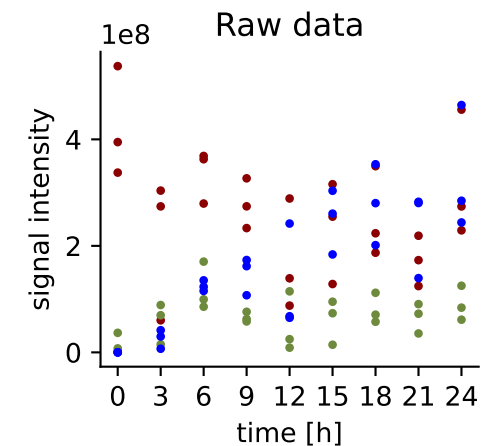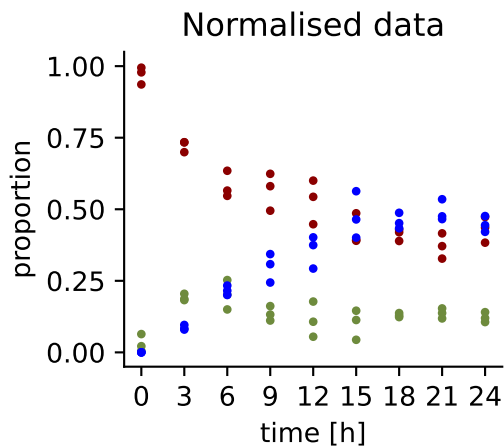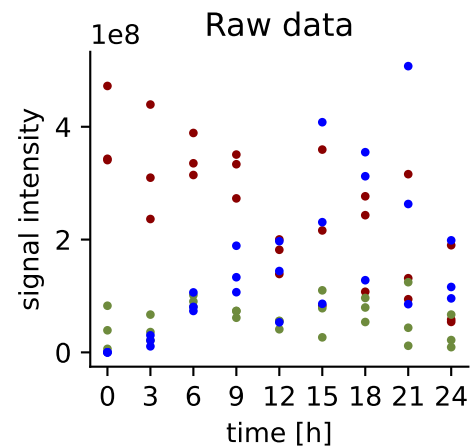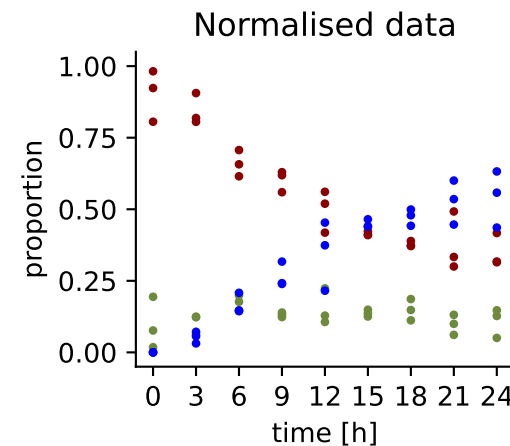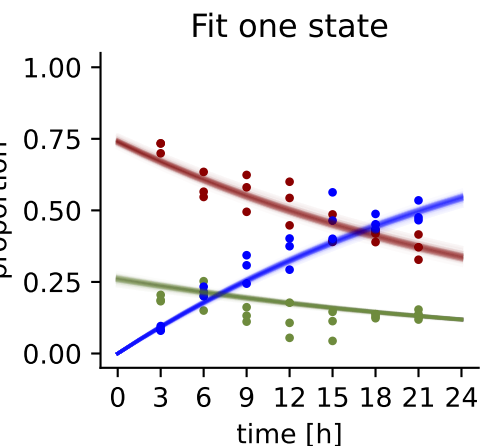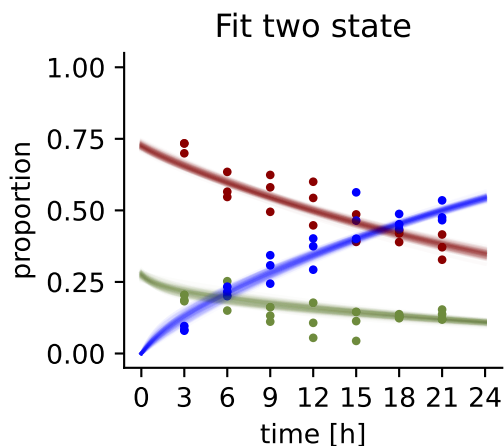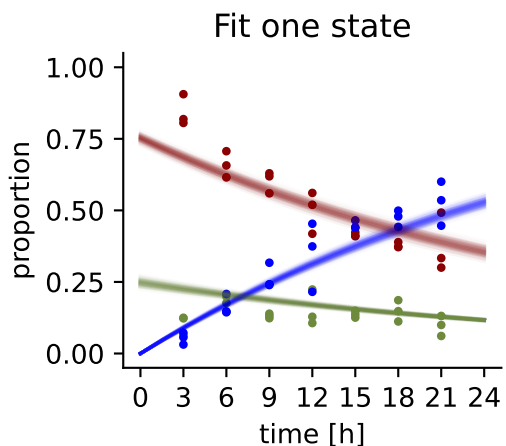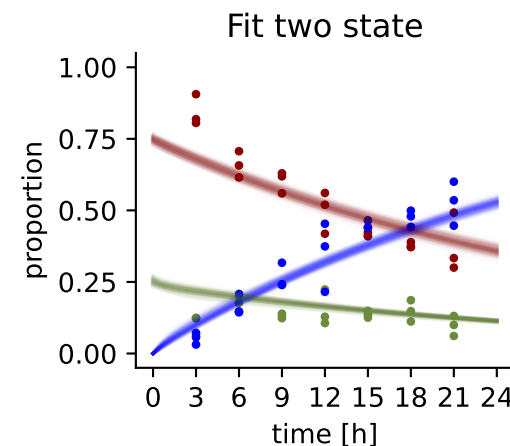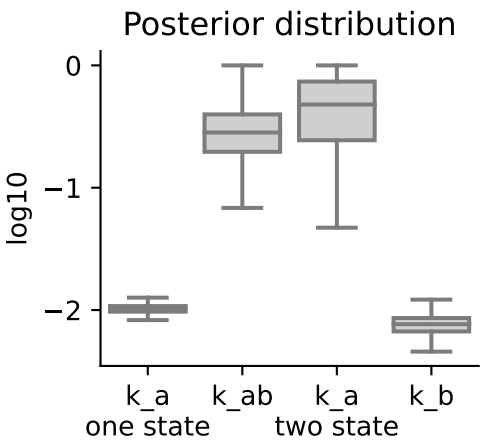

|                          |          |
|--------------------------|----------|
| p value                  | 1.02E-03 |
| log likelihood one state | 95.118   |
| log likelihood two state | 102.003  |
| rmse one state           | 0.362    |
| rmse two state           | 0.332    |
| k_a one state            | 0.01     |
| k_ab                     | 0.283    |
| k_a two state            | 0.479    |
| k_b                      | 0.008    |
| sigma one state          | 0.054    |
| sigma two state          | 0.051    |

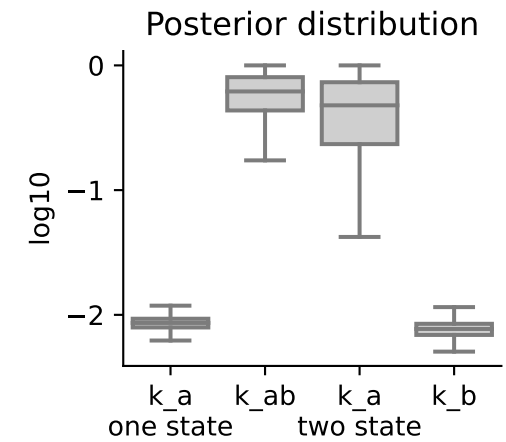

|                          |          |
|--------------------------|----------|
| p value                  | 6.33E-01 |
| log likelihood one state | 77.673   |
| log likelihood two state | 78.129   |
| rmse one state           | 0.379    |
| rmse two state           | 0.362    |
| k_a one state            | 0.009    |
| k_ab                     | 0.618    |
| k_a two state            | 0.478    |
| k_b                      | 0.008    |
| sigma one state          | 0.072    |
| sigma two state          | 0.071    |



mS33  
MRPS33  
Q9Y291  
28S ribosomal protein S33, mitochondrial

Cell lysate

Mitochondria

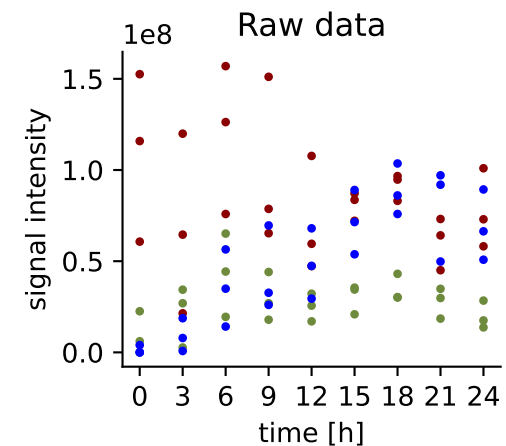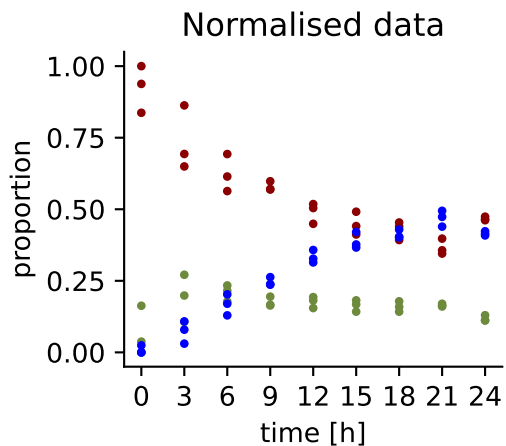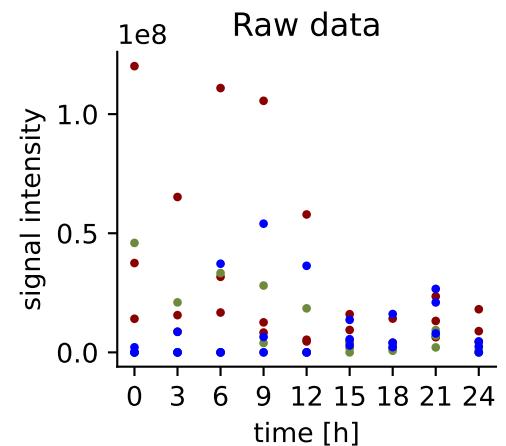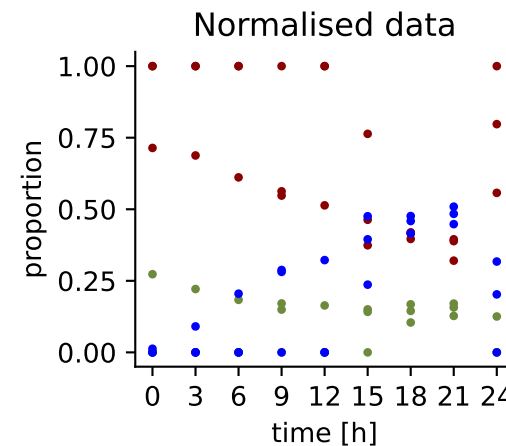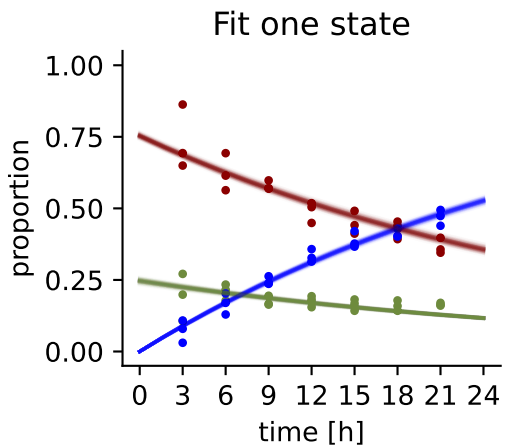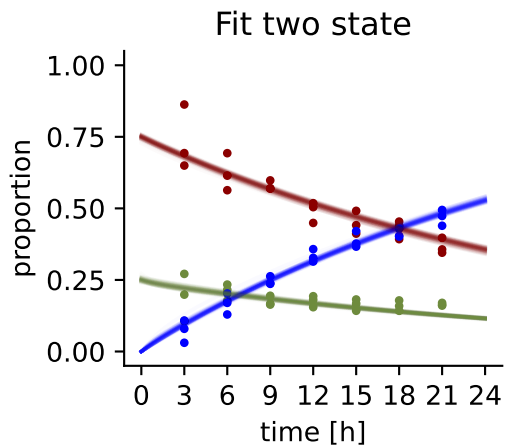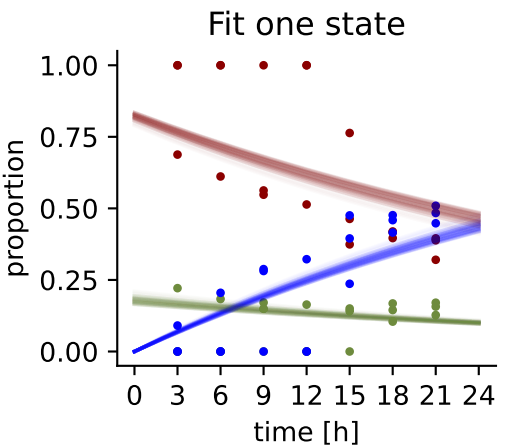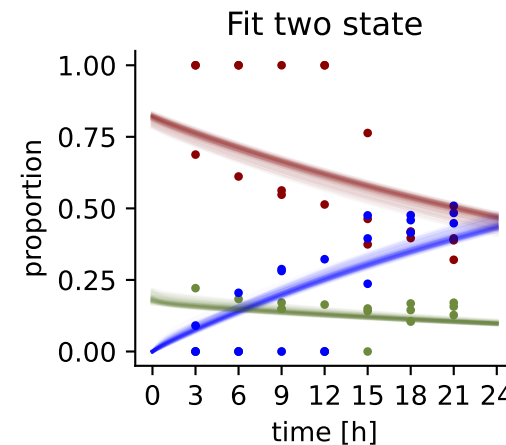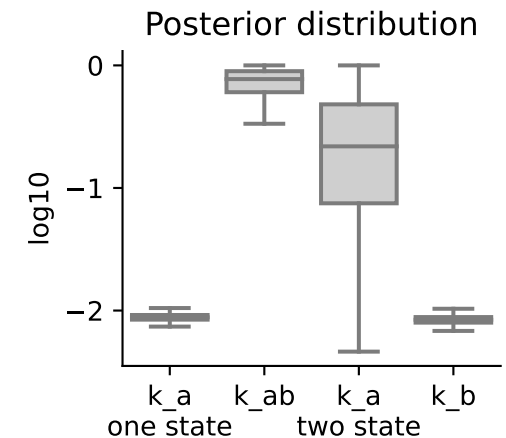

|                          |          |
|--------------------------|----------|
| p value                  | 4.23E-01 |
| log likelihood one state | 113.822  |
| log likelihood two state | 114.682  |
| rmse one state           | 0.327    |
| rmse two state           | 0.331    |
| k_a one state            | 0.009    |
| k_ab                     | 0.773    |
| k_a two state            | 0.219    |
| k_b                      | 0.008    |
| sigma one state          | 0.041    |
| sigma two state          | 0.041    |

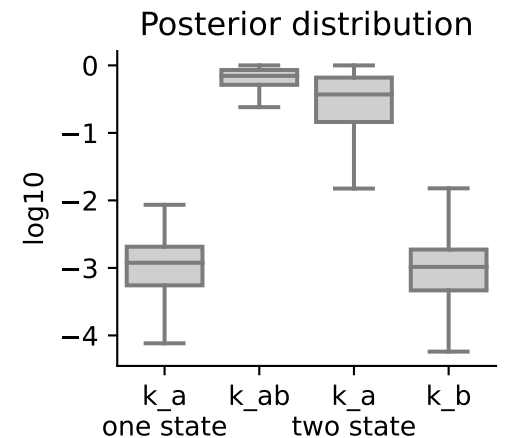

|                          |          |
|--------------------------|----------|
| p value                  | 1.00E+00 |
| log likelihood one state | 29.812   |
| log likelihood two state | 29.811   |
| rmse one state           | 0.404    |
| rmse two state           | 0.404    |
| k_a one state            | 0.001    |
| k_ab                     | 0.7      |
| k_a two state            | 0.371    |
| k_b                      | 0.001    |
| sigma one state          | 0.151    |
| sigma two state          | 0.152    |

mS34  
MRPS34  
P82930  
28S ribosomal protein S34, mitochondrial

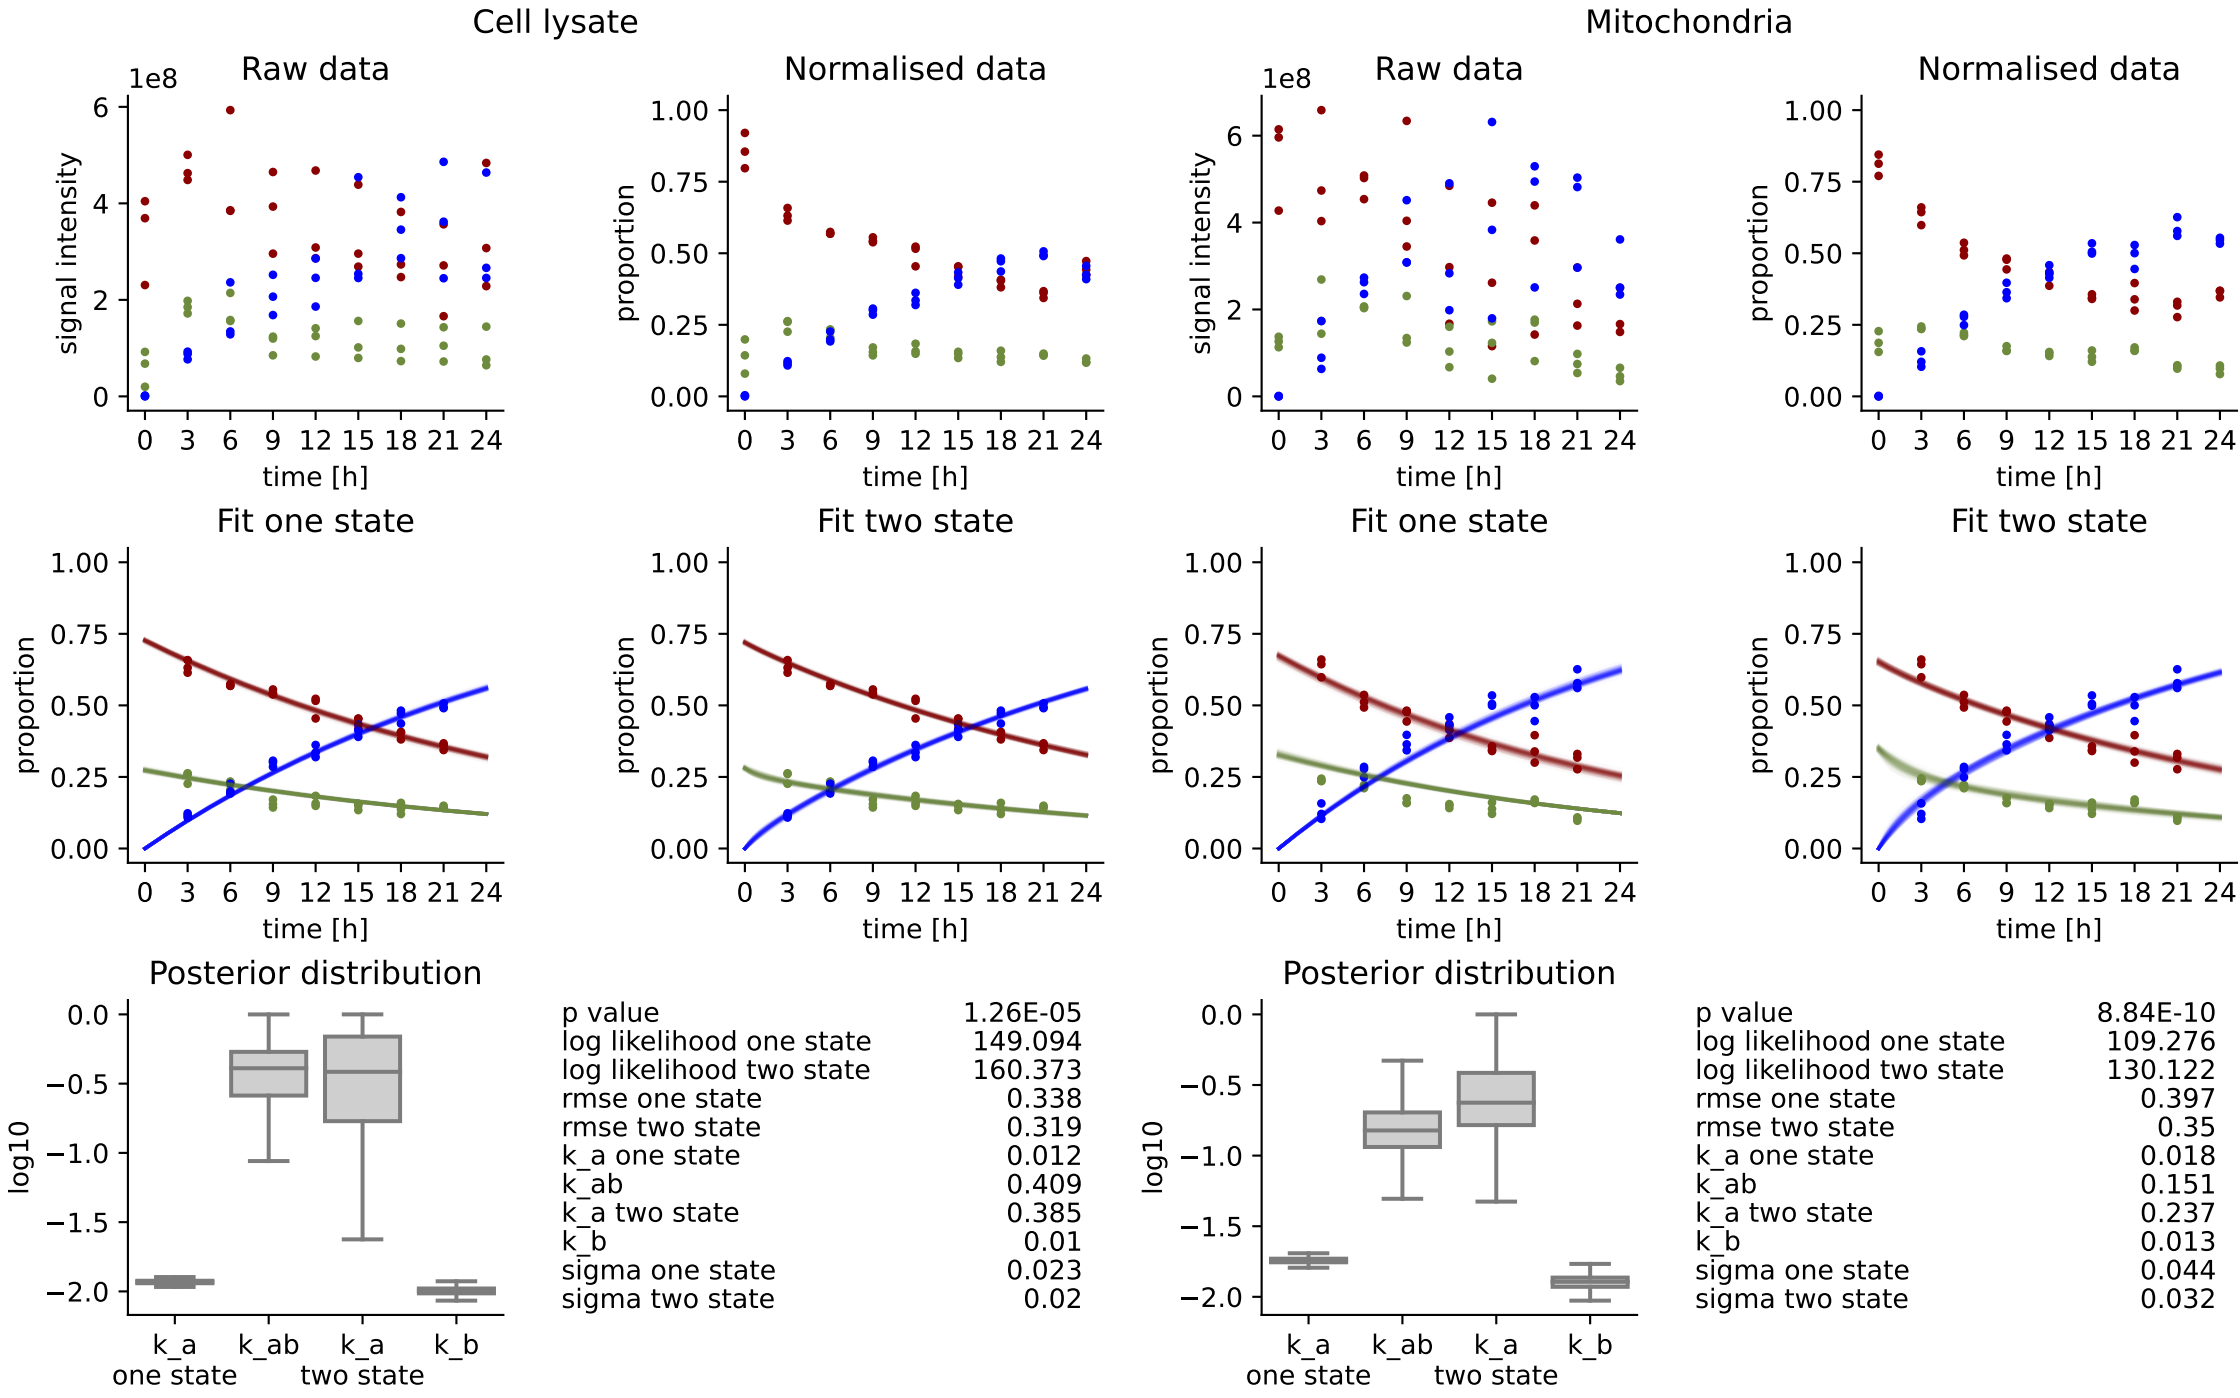

mS35  
MRPS35  
P82673  
28S ribosomal protein S35, mitochondrial

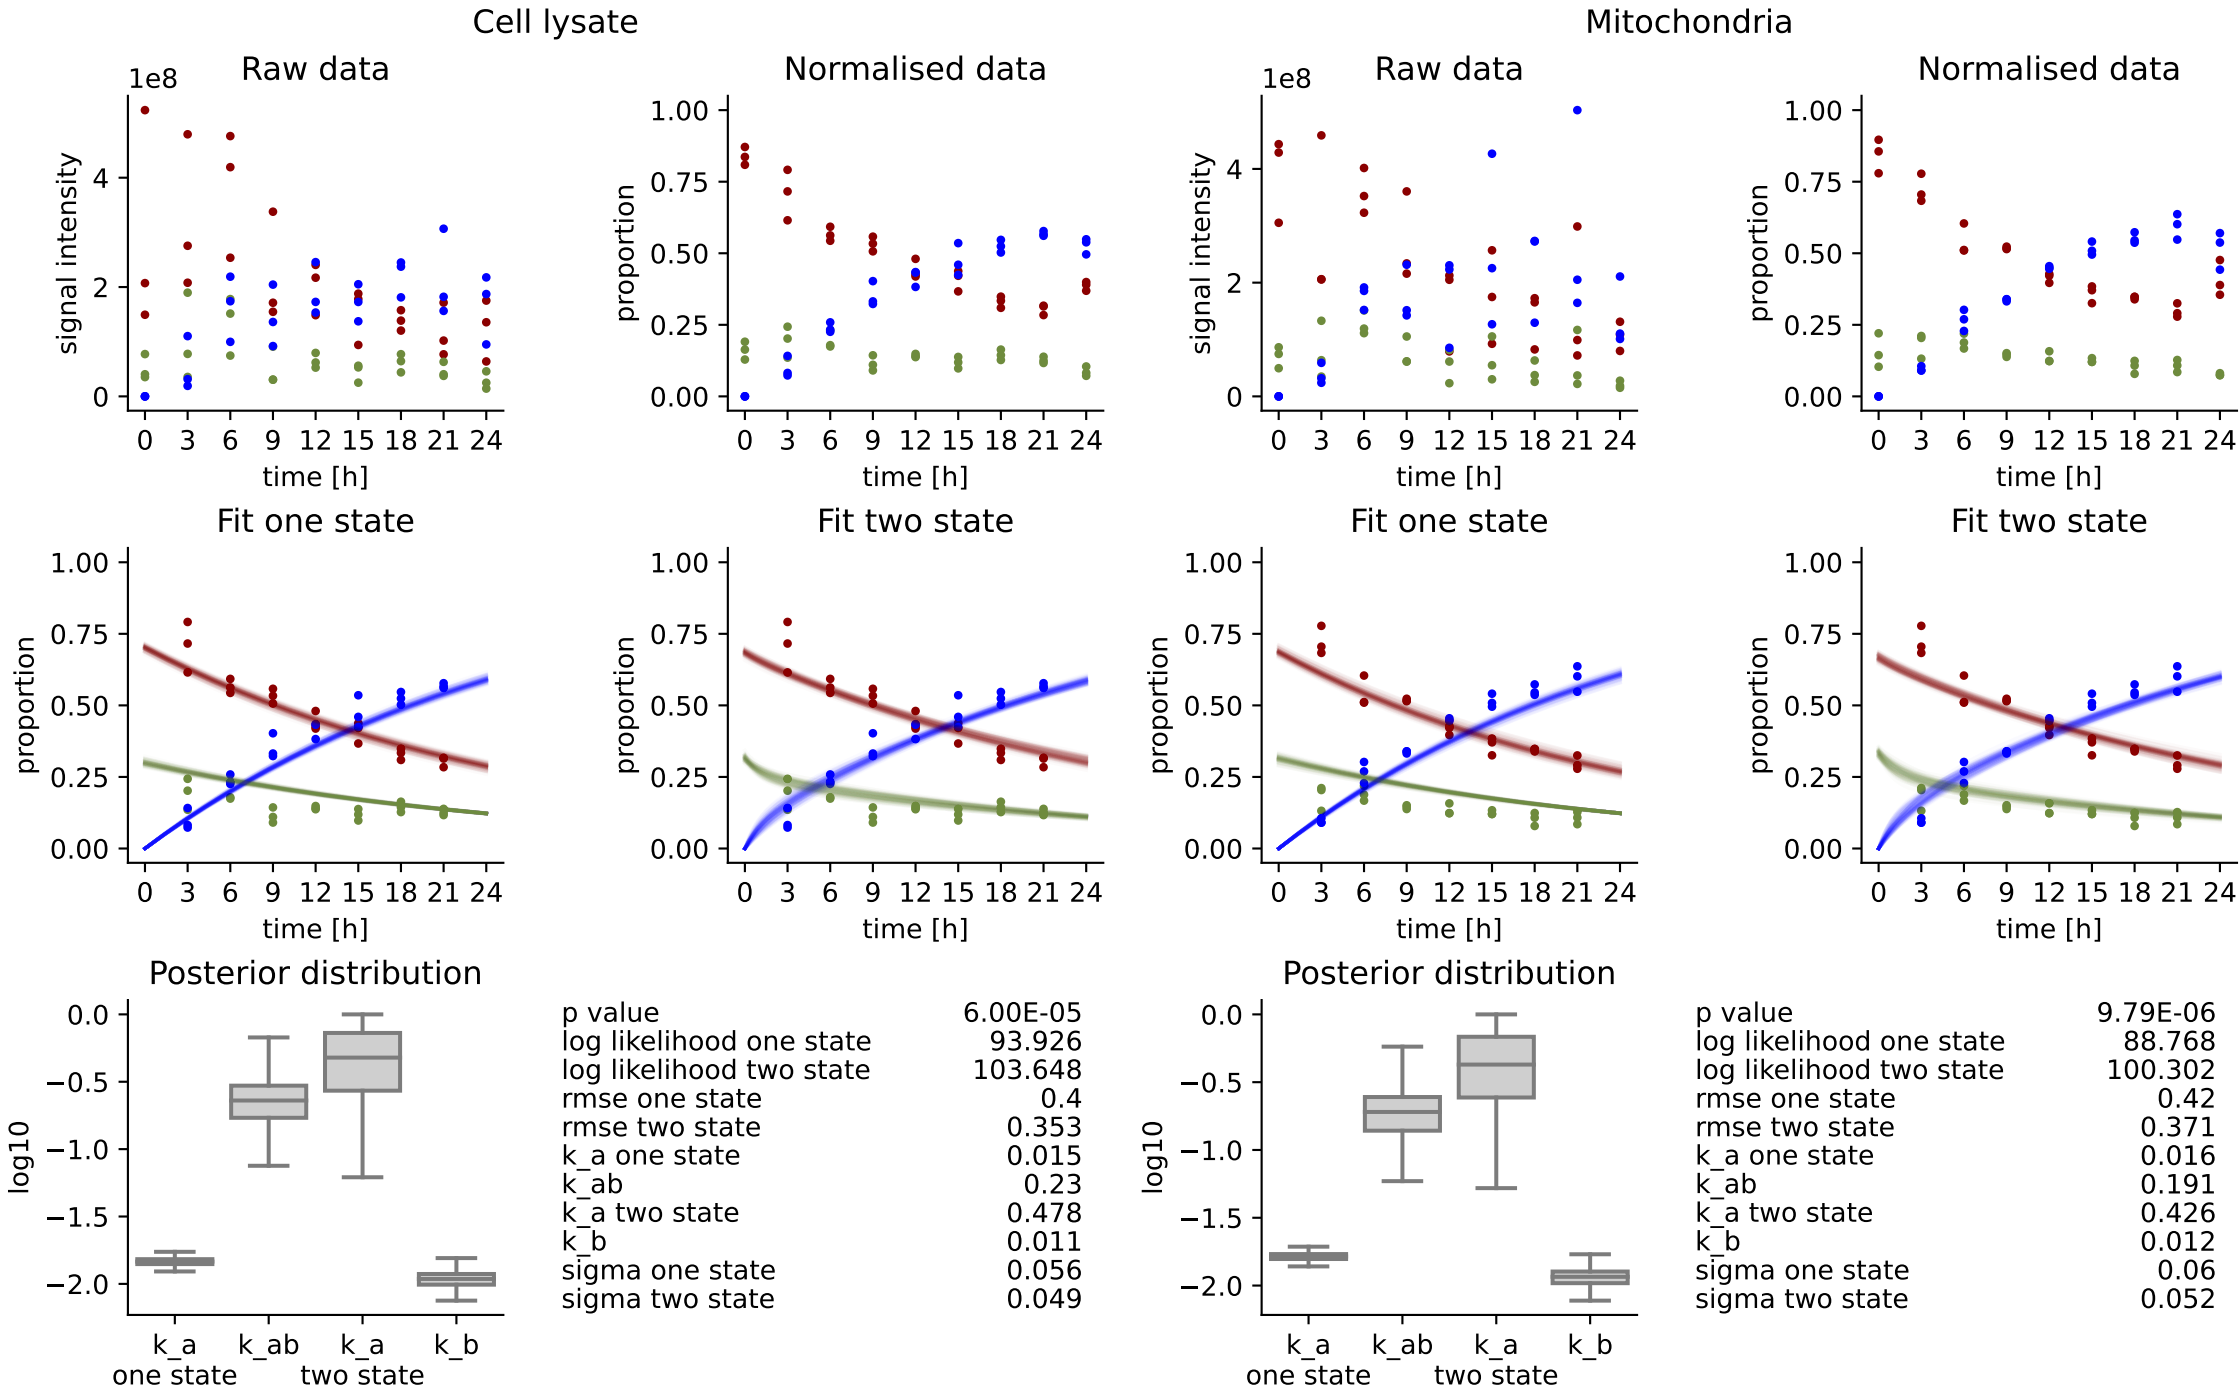

mS37  
CHCHD1  
Q96BP2  
Coiled-coil-helix-coiled-coil-helix domain-containing protein 1

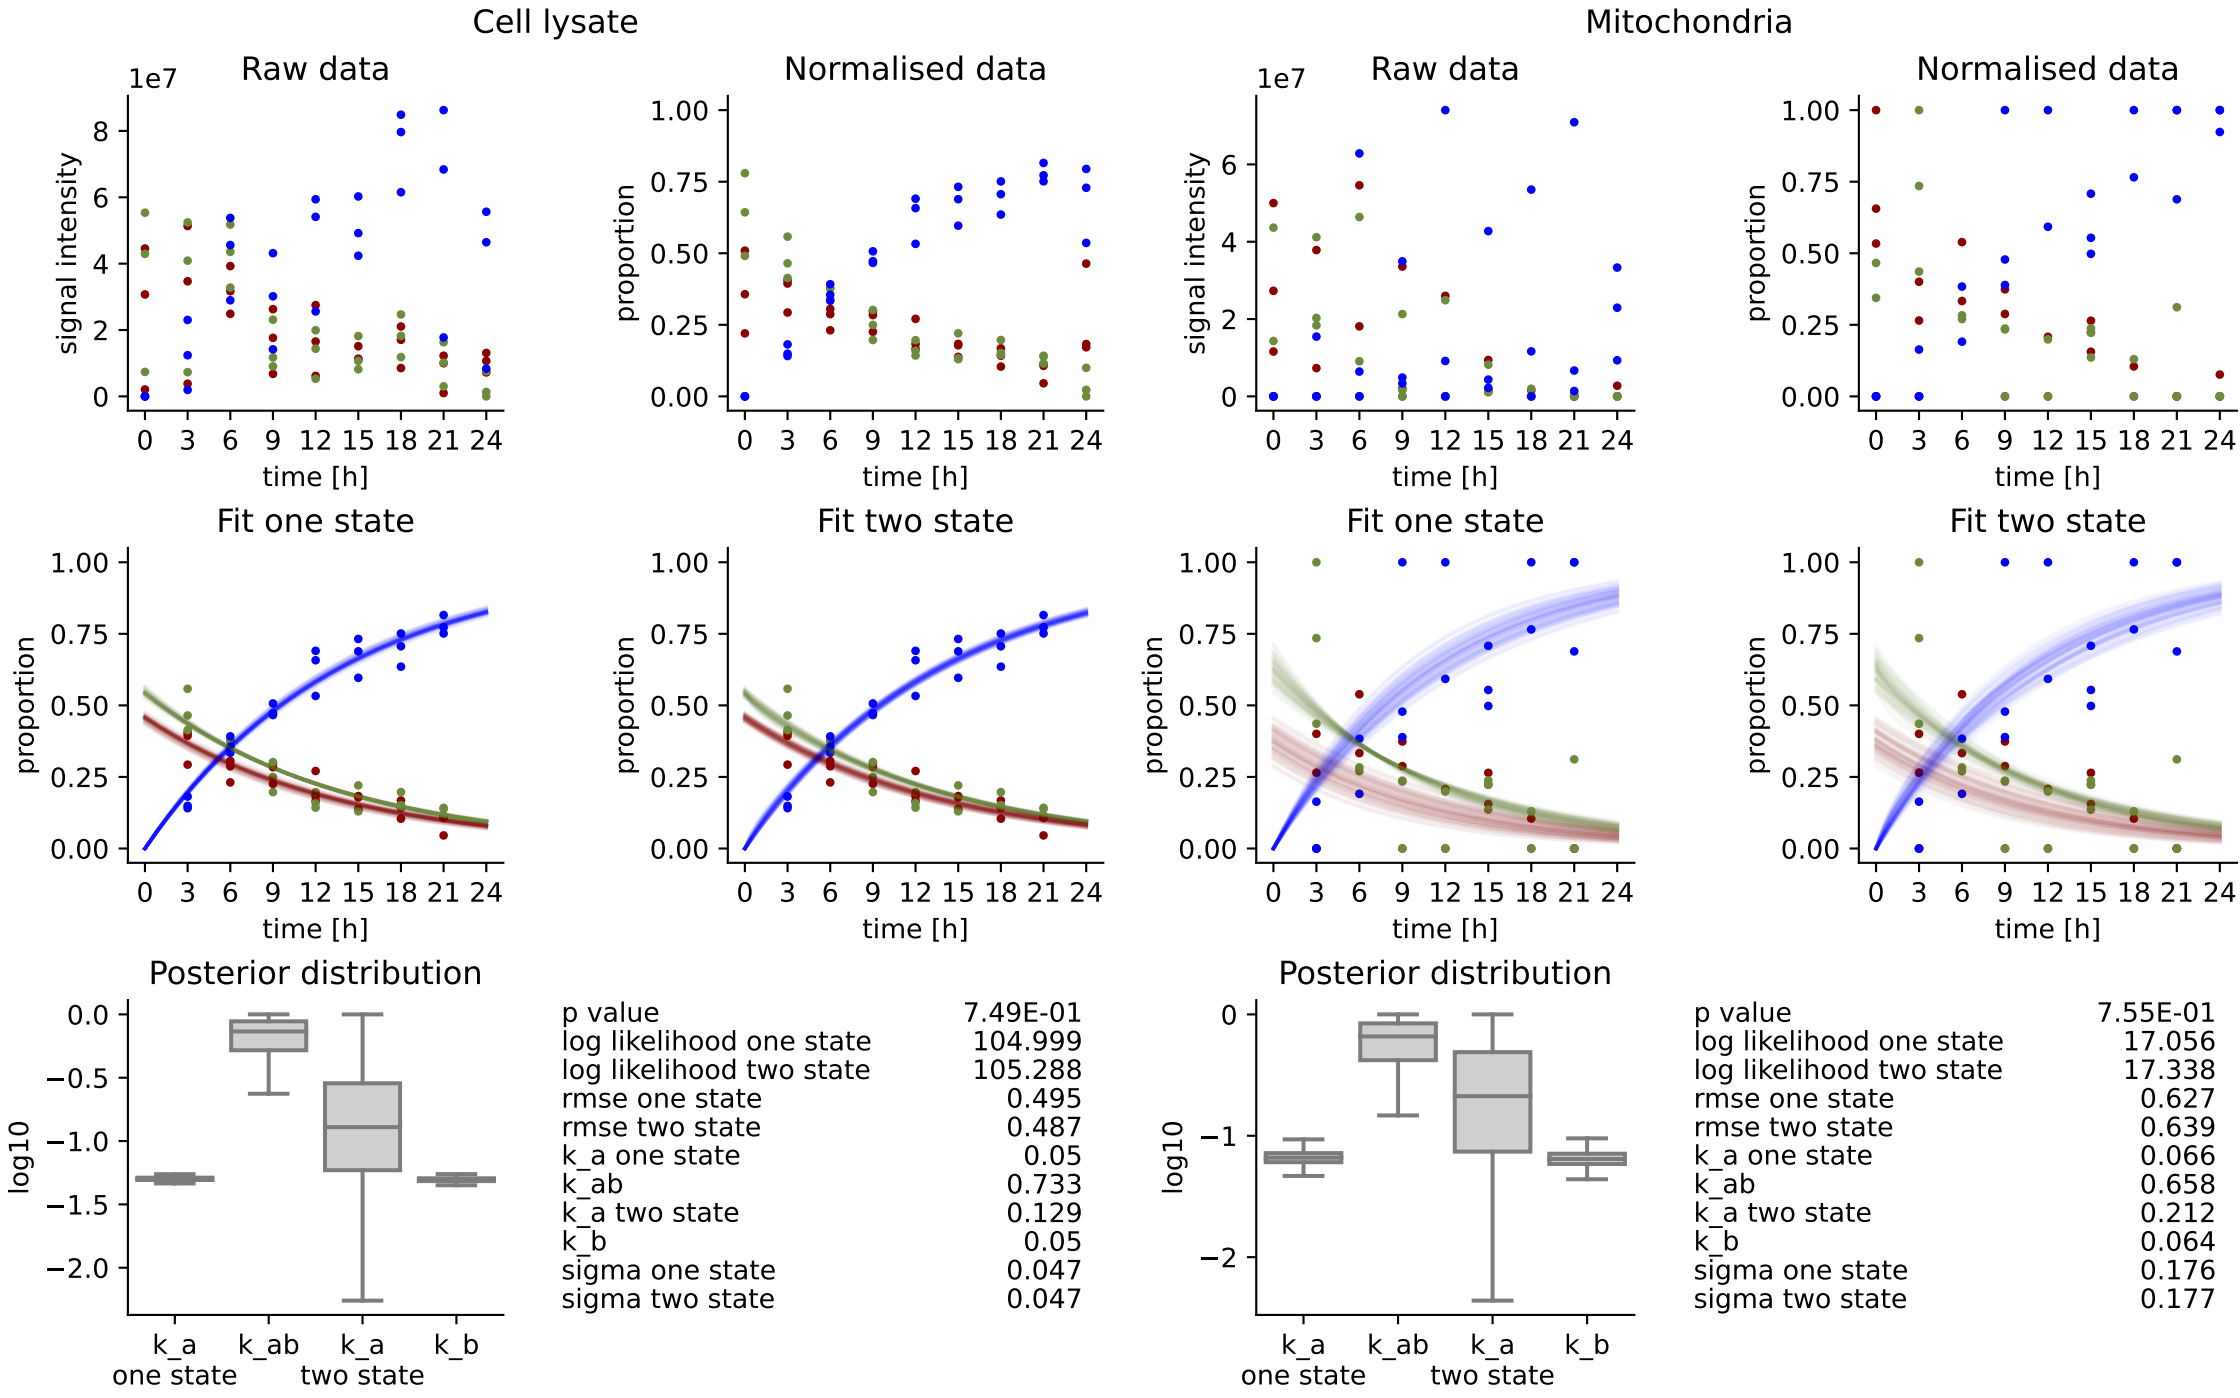

mS39  
PTCD3  
Q96EY7  
Pentatricopeptide repeat domain-containing protein 3, mitochondrial

Cell lysate

Mitochondria

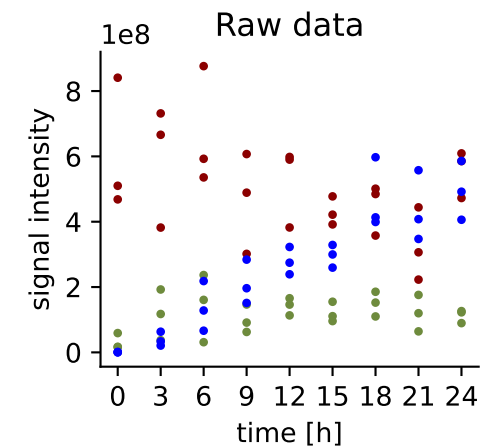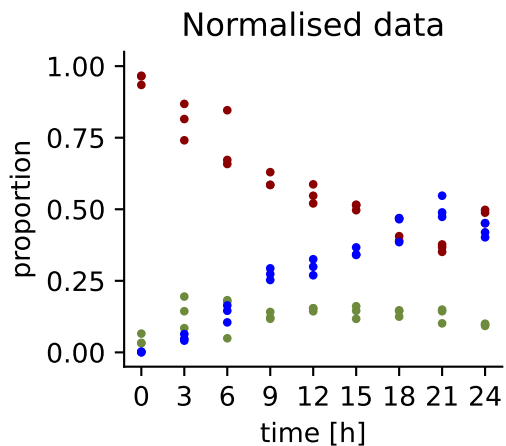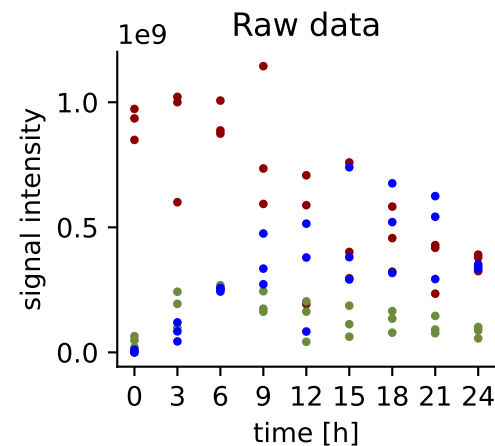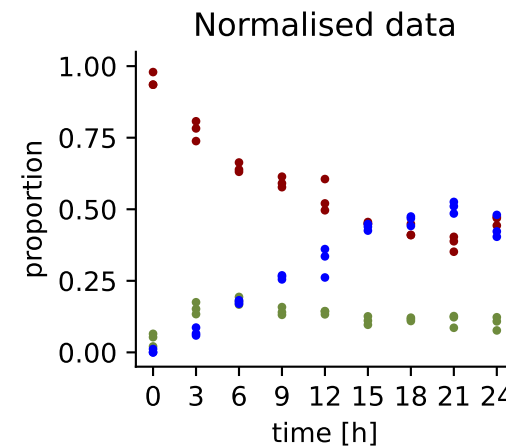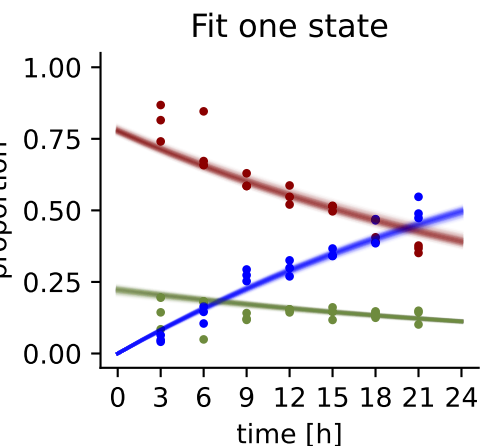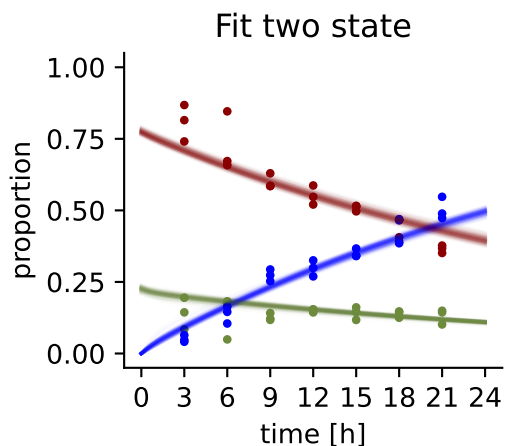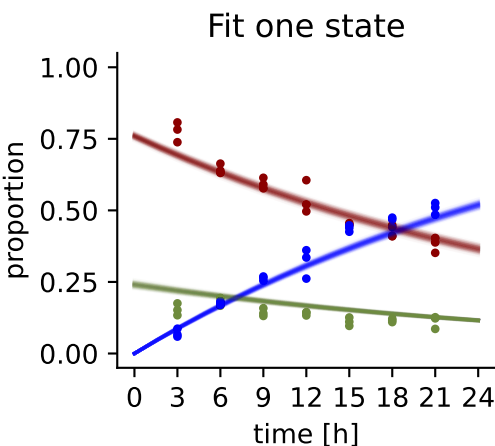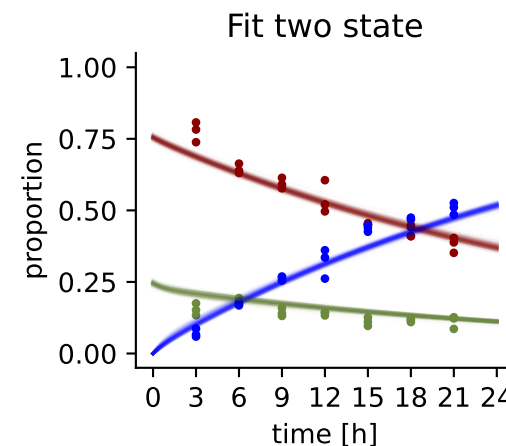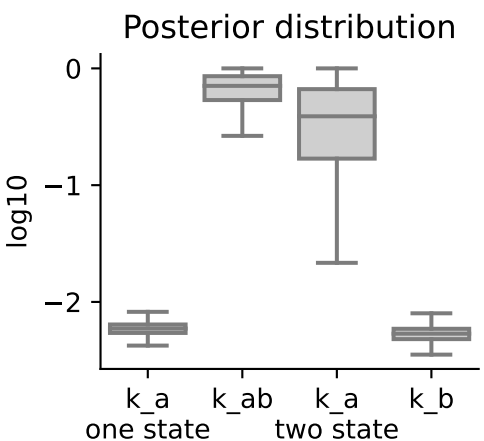

|                          |          |
|--------------------------|----------|
| p value                  | 9.67E-01 |
| log likelihood one state | 95.26    |
| log likelihood two state | 95.293   |
| rmse one state           | 0.342    |
| rmse two state           | 0.339    |
| k_a one state            | 0.006    |
| k_ab                     | 0.708    |
| k_a two state            | 0.389    |
| k_b                      | 0.005    |
| sigma one state          | 0.054    |
| sigma two state          | 0.055    |

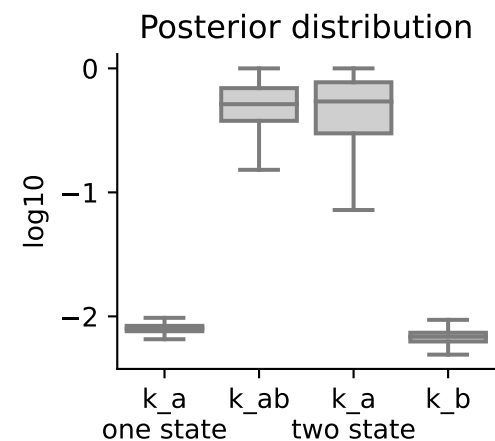

|                          |          |
|--------------------------|----------|
| p value                  | 4.20E-02 |
| log likelihood one state | 112.078  |
| log likelihood two state | 115.247  |
| rmse one state           | 0.351    |
| rmse two state           | 0.338    |
| k_a one state            | 0.008    |
| k_ab                     | 0.514    |
| k_a two state            | 0.541    |
| k_b                      | 0.007    |
| sigma one state          | 0.042    |
| sigma two state          | 0.04     |

mS40  
MRPS18B  
Q9Y676  
28S ribosomal protein S18b, mitochondrial

Cell lysate

Mitochondria

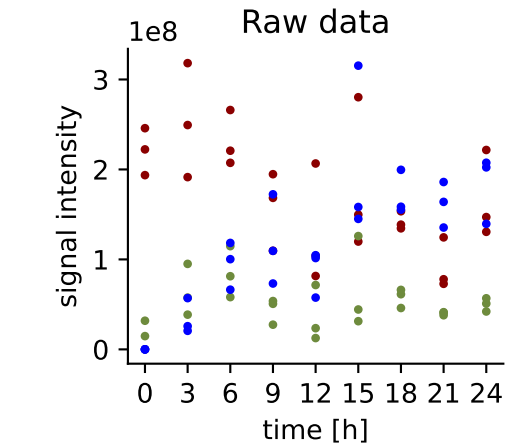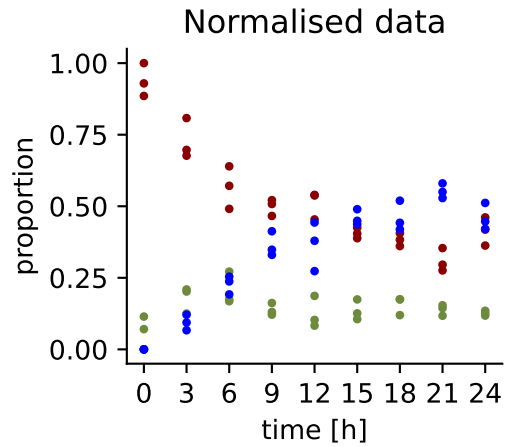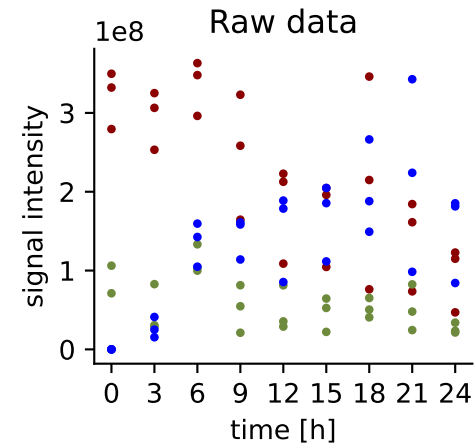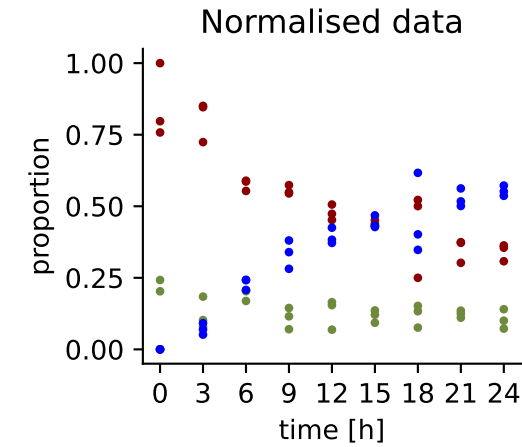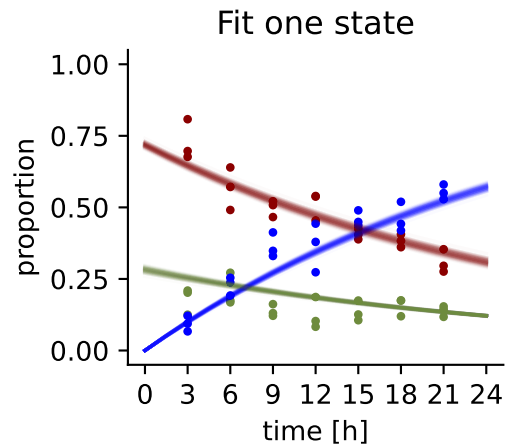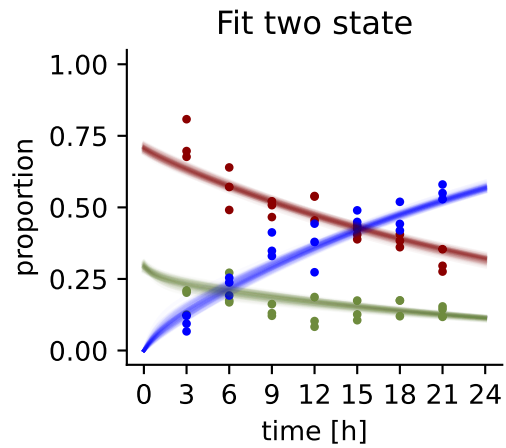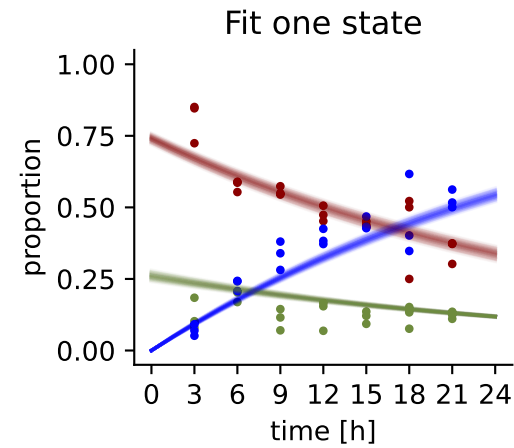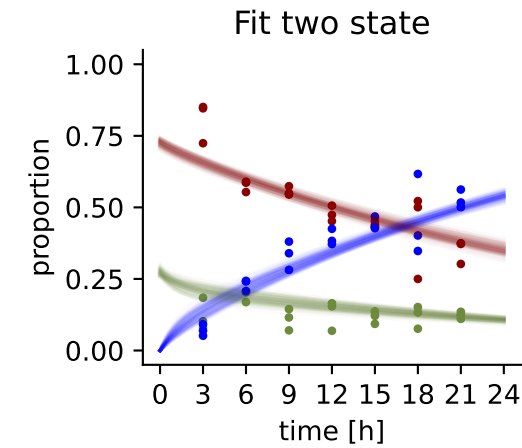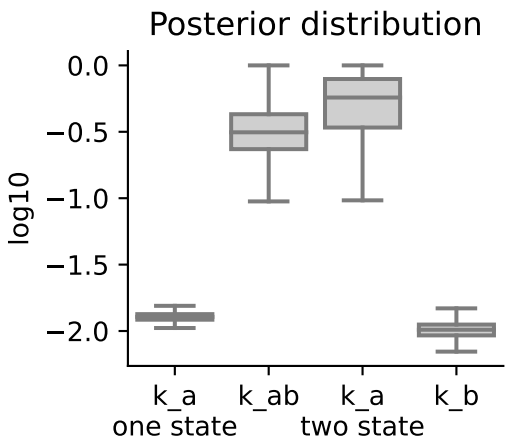

|                          |          |
|--------------------------|----------|
| p value                  | 4.00E-03 |
| log likelihood one state | 91.0     |
| log likelihood two state | 96.52    |
| rmse one state           | 0.381    |
| rmse two state           | 0.342    |
| k_a one state            | 0.013    |
| k_ab                     | 0.313    |
| k_a two state            | 0.573    |
| k_b                      | 0.01     |
| sigma one state          | 0.058    |
| sigma two state          | 0.054    |

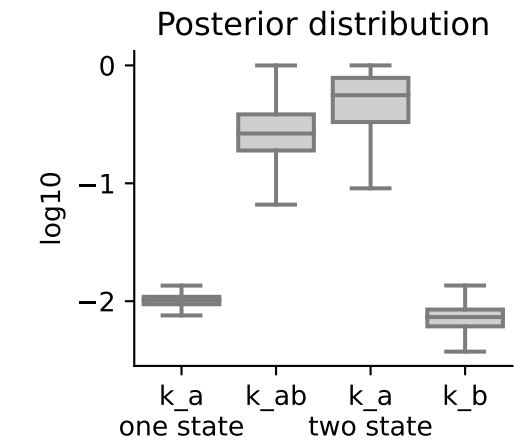

|                          |          |
|--------------------------|----------|
| p value                  | 6.50E-03 |
| log likelihood one state | 76.371   |
| log likelihood two state | 81.406   |
| rmse one state           | 0.384    |
| rmse two state           | 0.337    |
| k_a one state            | 0.01     |
| k_ab                     | 0.264    |
| k_a two state            | 0.559    |
| k_b                      | 0.007    |
| sigma one state          | 0.073    |
| sigma two state          | 0.069    |

TFB1M  
TFB1M  
Q8WVM0  
Dimethyladenosine transferase 1, mitochondrial

Cell lysate

Mitochondria

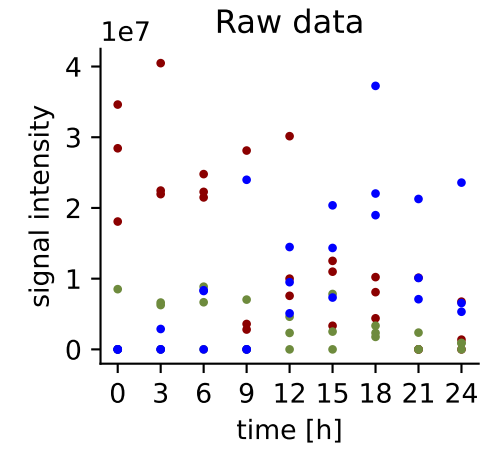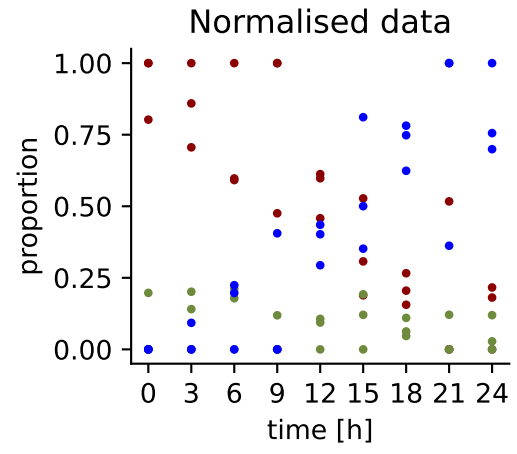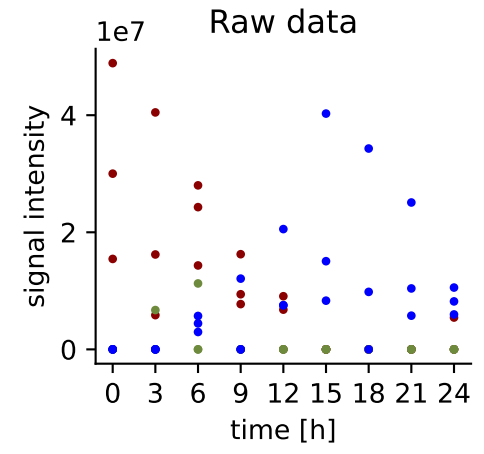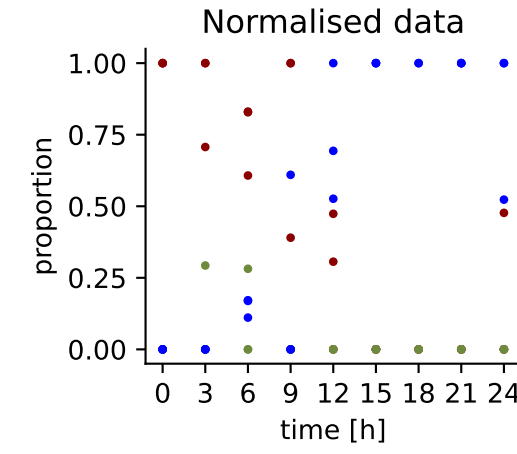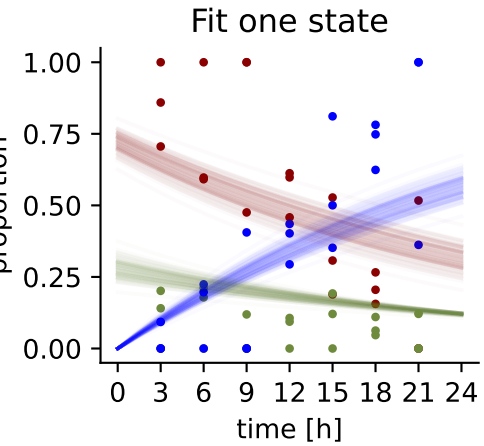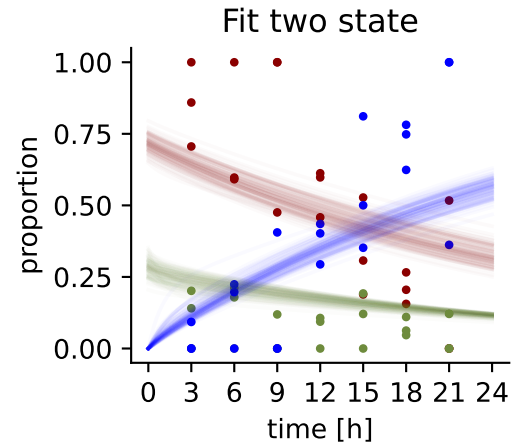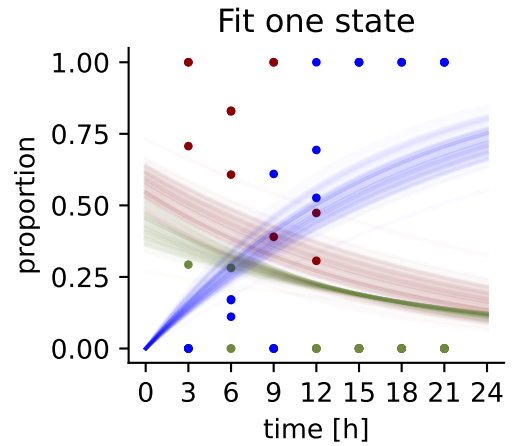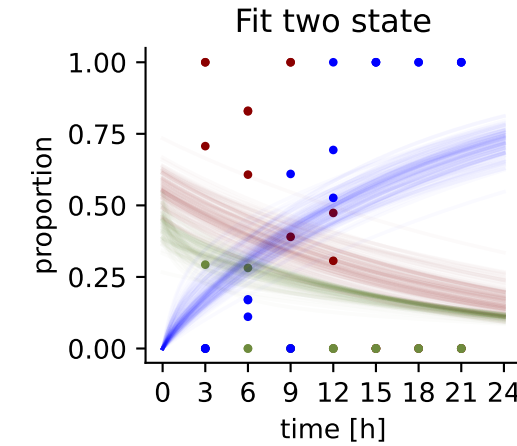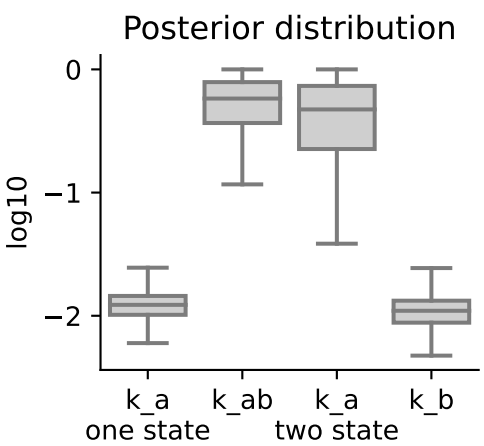

|                          |          |
|--------------------------|----------|
| p value                  | 8.88E-01 |
| log likelihood one state | 9.424    |
| log likelihood two state | 9.543    |
| rmse one state           | 0.583    |
| rmse two state           | 0.569    |
| k_a one state            | 0.012    |
| k_ab                     | 0.58     |
| k_a two state            | 0.473    |
| k_b                      | 0.011    |
| sigma one state          | 0.206    |
| sigma two state          | 0.206    |

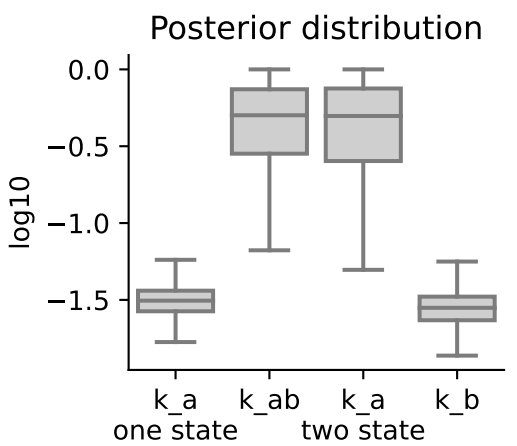

|                          |          |
|--------------------------|----------|
| p value                  | 5.71E-01 |
| log likelihood one state | -12.435  |
| log likelihood two state | -11.873  |
| rmse one state           | 0.812    |
| rmse two state           | 0.76     |
| k_a one state            | 0.031    |
| k_ab                     | 0.503    |
| k_a two state            | 0.497    |
| k_b                      | 0.028    |
| sigma one state          | 0.285    |
| sigma two state          | 0.284    |



METTLL15  
METTL15  
A6NJ78

Probable methyltransferase-like protein 15

Cell lysate

Mitochondria

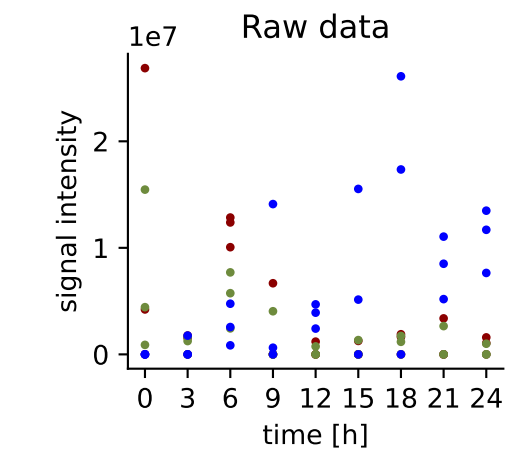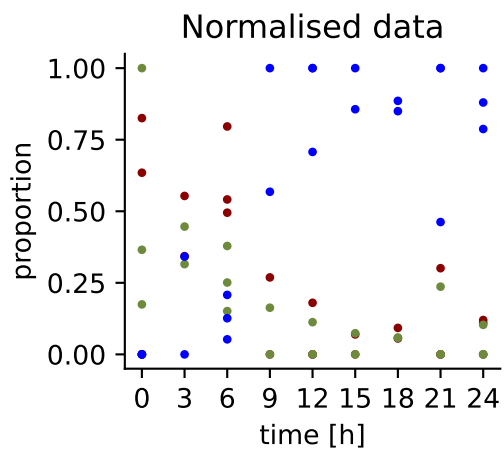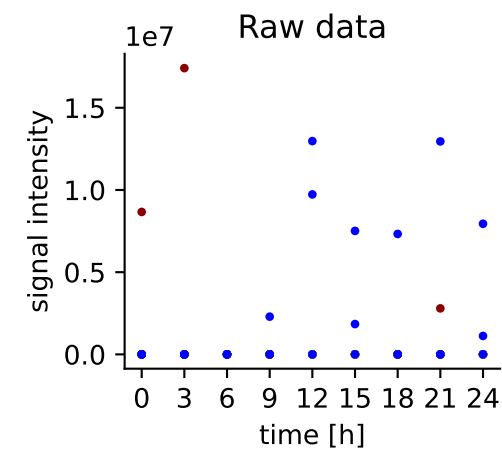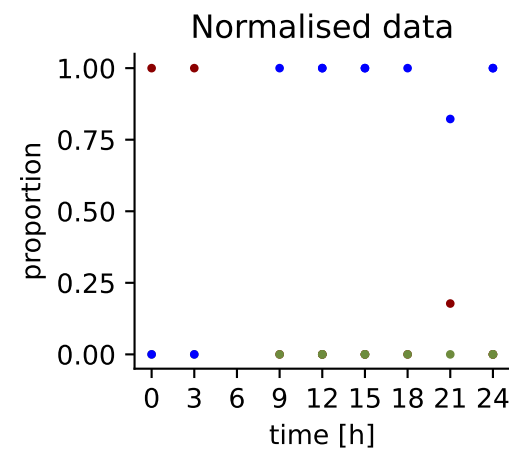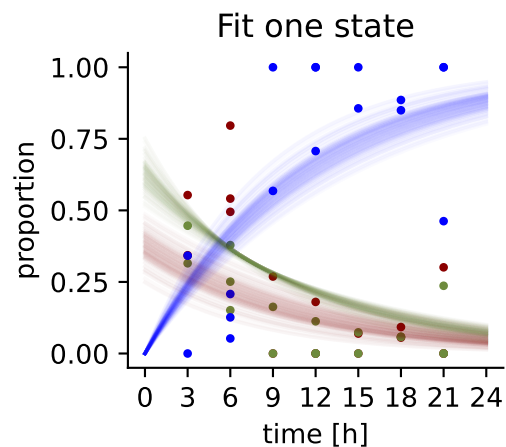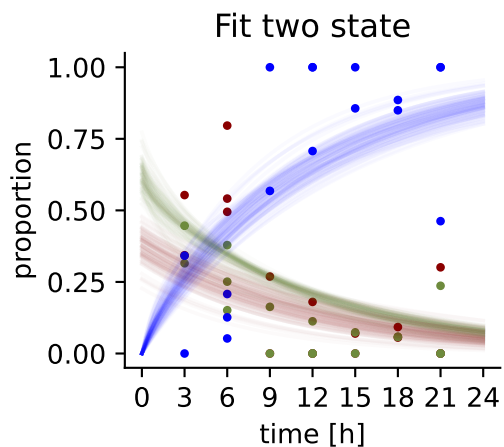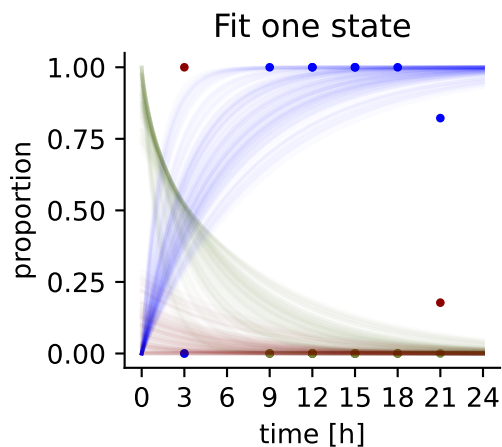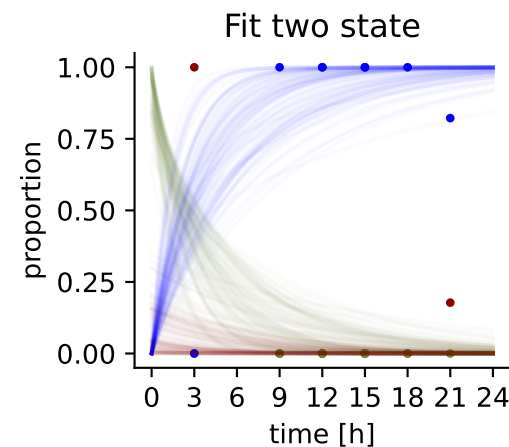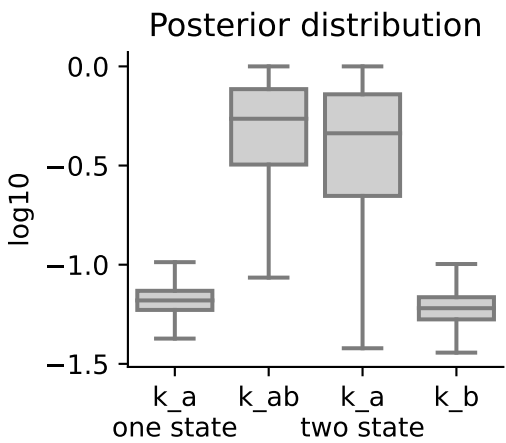

|                          |          |
|--------------------------|----------|
| p value                  | 3.10E-01 |
| log likelihood one state | 8.417    |
| log likelihood two state | 9.587    |
| rmse one state           | 0.716    |
| rmse two state           | 0.664    |
| k_a one state            | 0.066    |
| k_ab                     | 0.544    |
| k_a two state            | 0.46     |
| k_b                      | 0.06     |
| sigma one state          | 0.202    |
| sigma two state          | 0.202    |

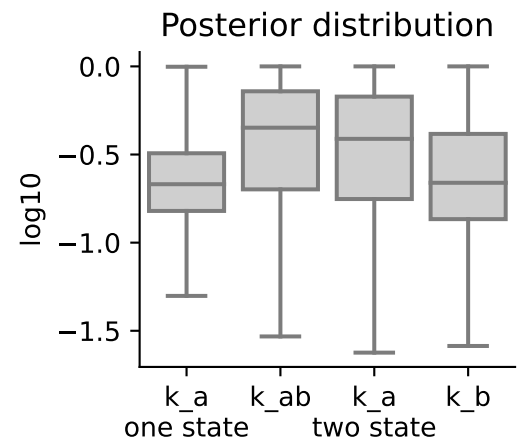

|                          |          |
|--------------------------|----------|
| p value                  | 3.33E-01 |
| log likelihood one state | -0.632   |
| log likelihood two state | 0.468    |
| rmse one state           | 0.83     |
| rmse two state           | 0.674    |
| k_a one state            | 0.215    |
| k_ab                     | 0.449    |
| k_a two state            | 0.388    |
| k_b                      | 0.219    |
| sigma one state          | 0.236    |
| sigma two state          | 0.235    |

NSUN4  
NSUN4  
Q96CB9

5-methylcytosine rRNA methyltransferase NSUN4

Cell lysate

Mitochondria

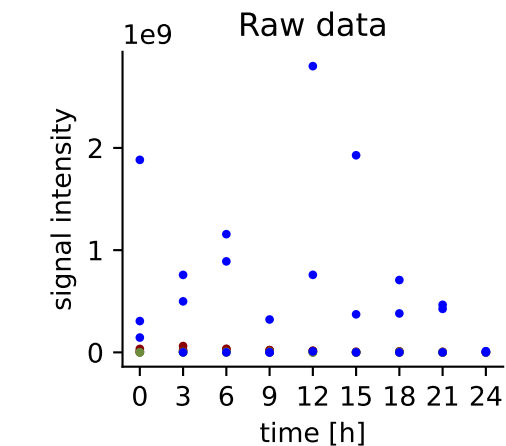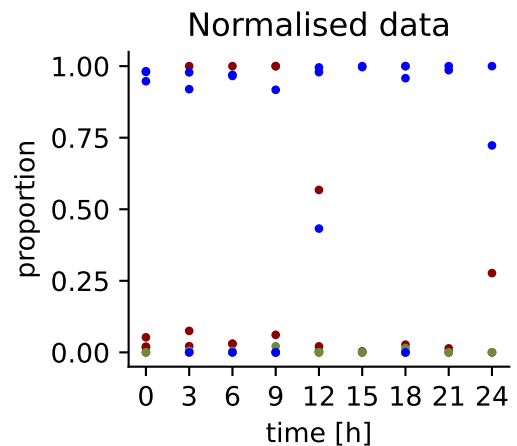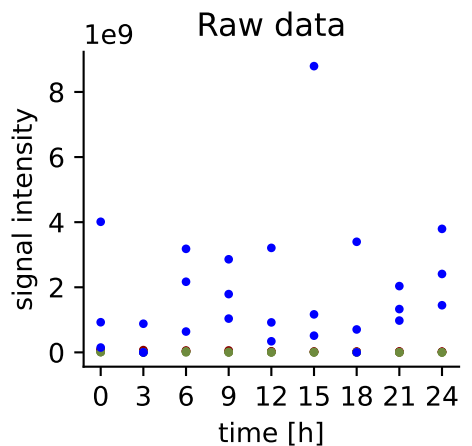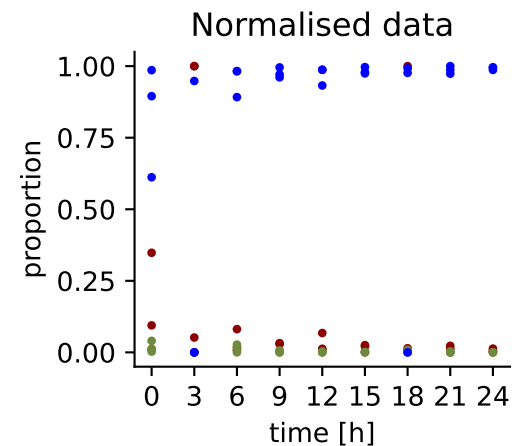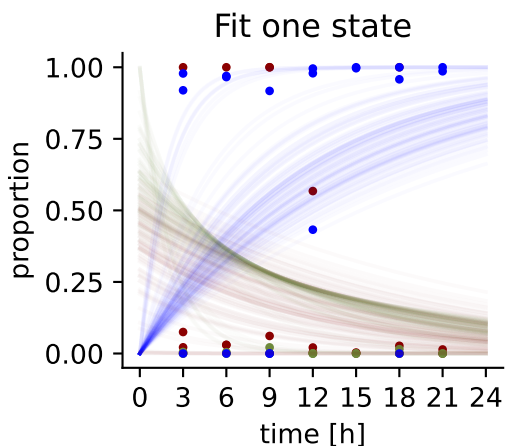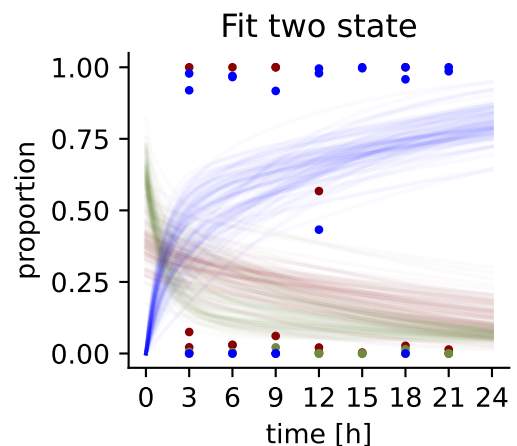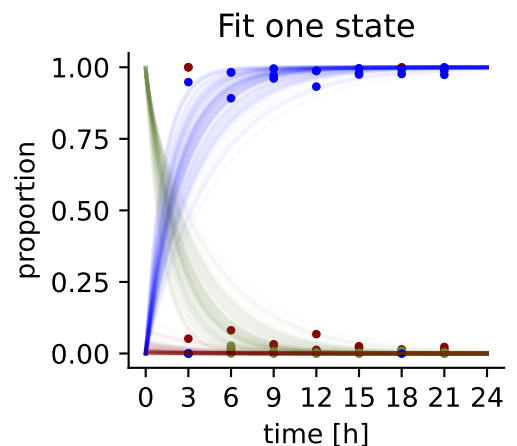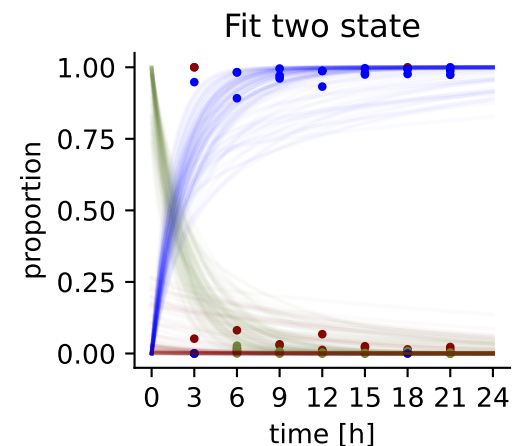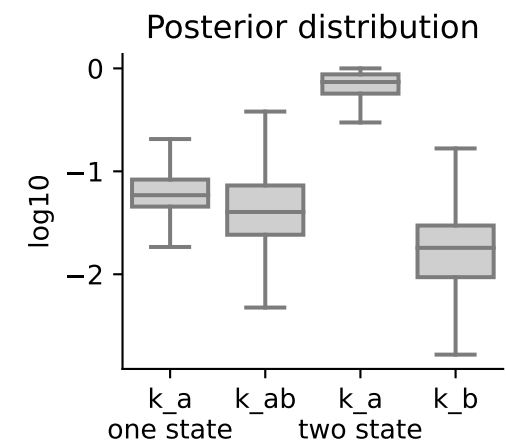

|                          |          |
|--------------------------|----------|
| p value                  | 5.05E-04 |
| log likelihood one state | -28.233  |
| log likelihood two state | -20.641  |
| rmse one state           | 0.898    |
| rmse two state           | 0.623    |
| k_a one state            | 0.059    |
| k_ab                     | 0.04     |
| k_a two state            | 0.738    |
| k_b                      | 0.018    |
| sigma one state          | 0.367    |
| sigma two state          | 0.334    |

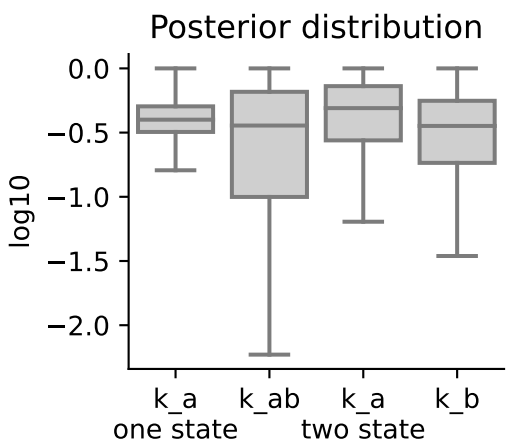

|                          |          |
|--------------------------|----------|
| p value                  | 5.98E-03 |
| log likelihood one state | -11.687  |
| log likelihood two state | -6.567   |
| rmse one state           | 0.621    |
| rmse two state           | 0.542    |
| k_a one state            | 0.399    |
| k_ab                     | 0.359    |
| k_a two state            | 0.49     |
| k_b                      | 0.356    |
| sigma one state          | 0.28     |
| sigma two state          | 0.277    |

TRMT2B  
TRMT2B  
Q96GJ1  
tRNA (uracil(54)-C(5))-methyltransferase homolog

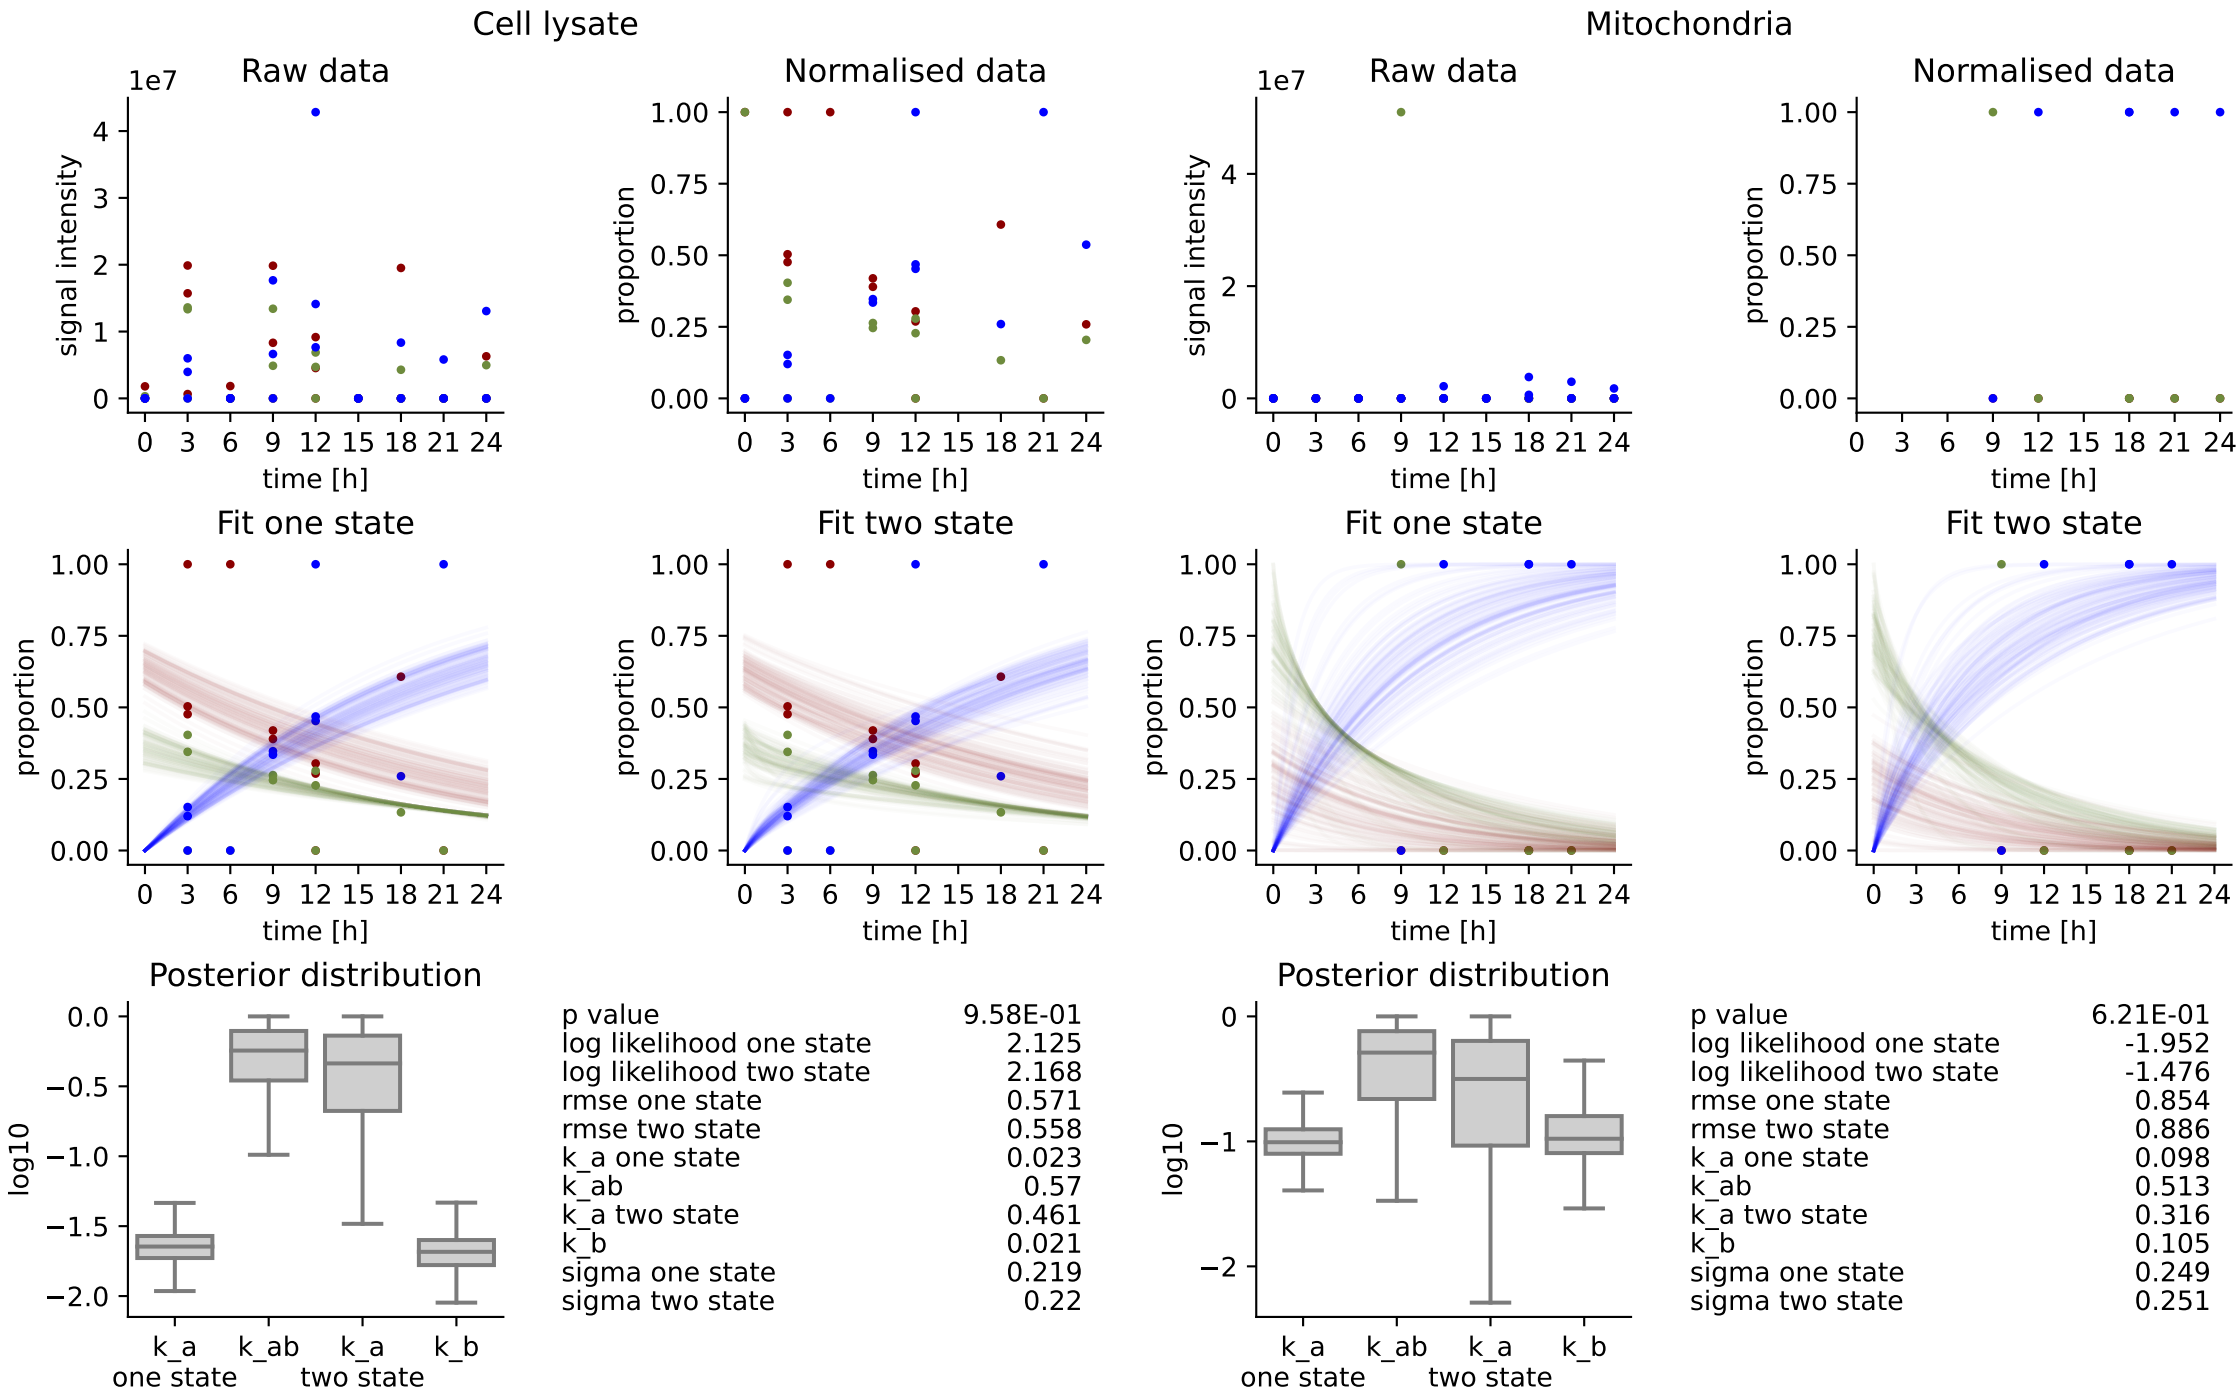

METTL17  
METTL17  
Q9H7H0  
Methyltransferase-like protein 17, mitochondrial

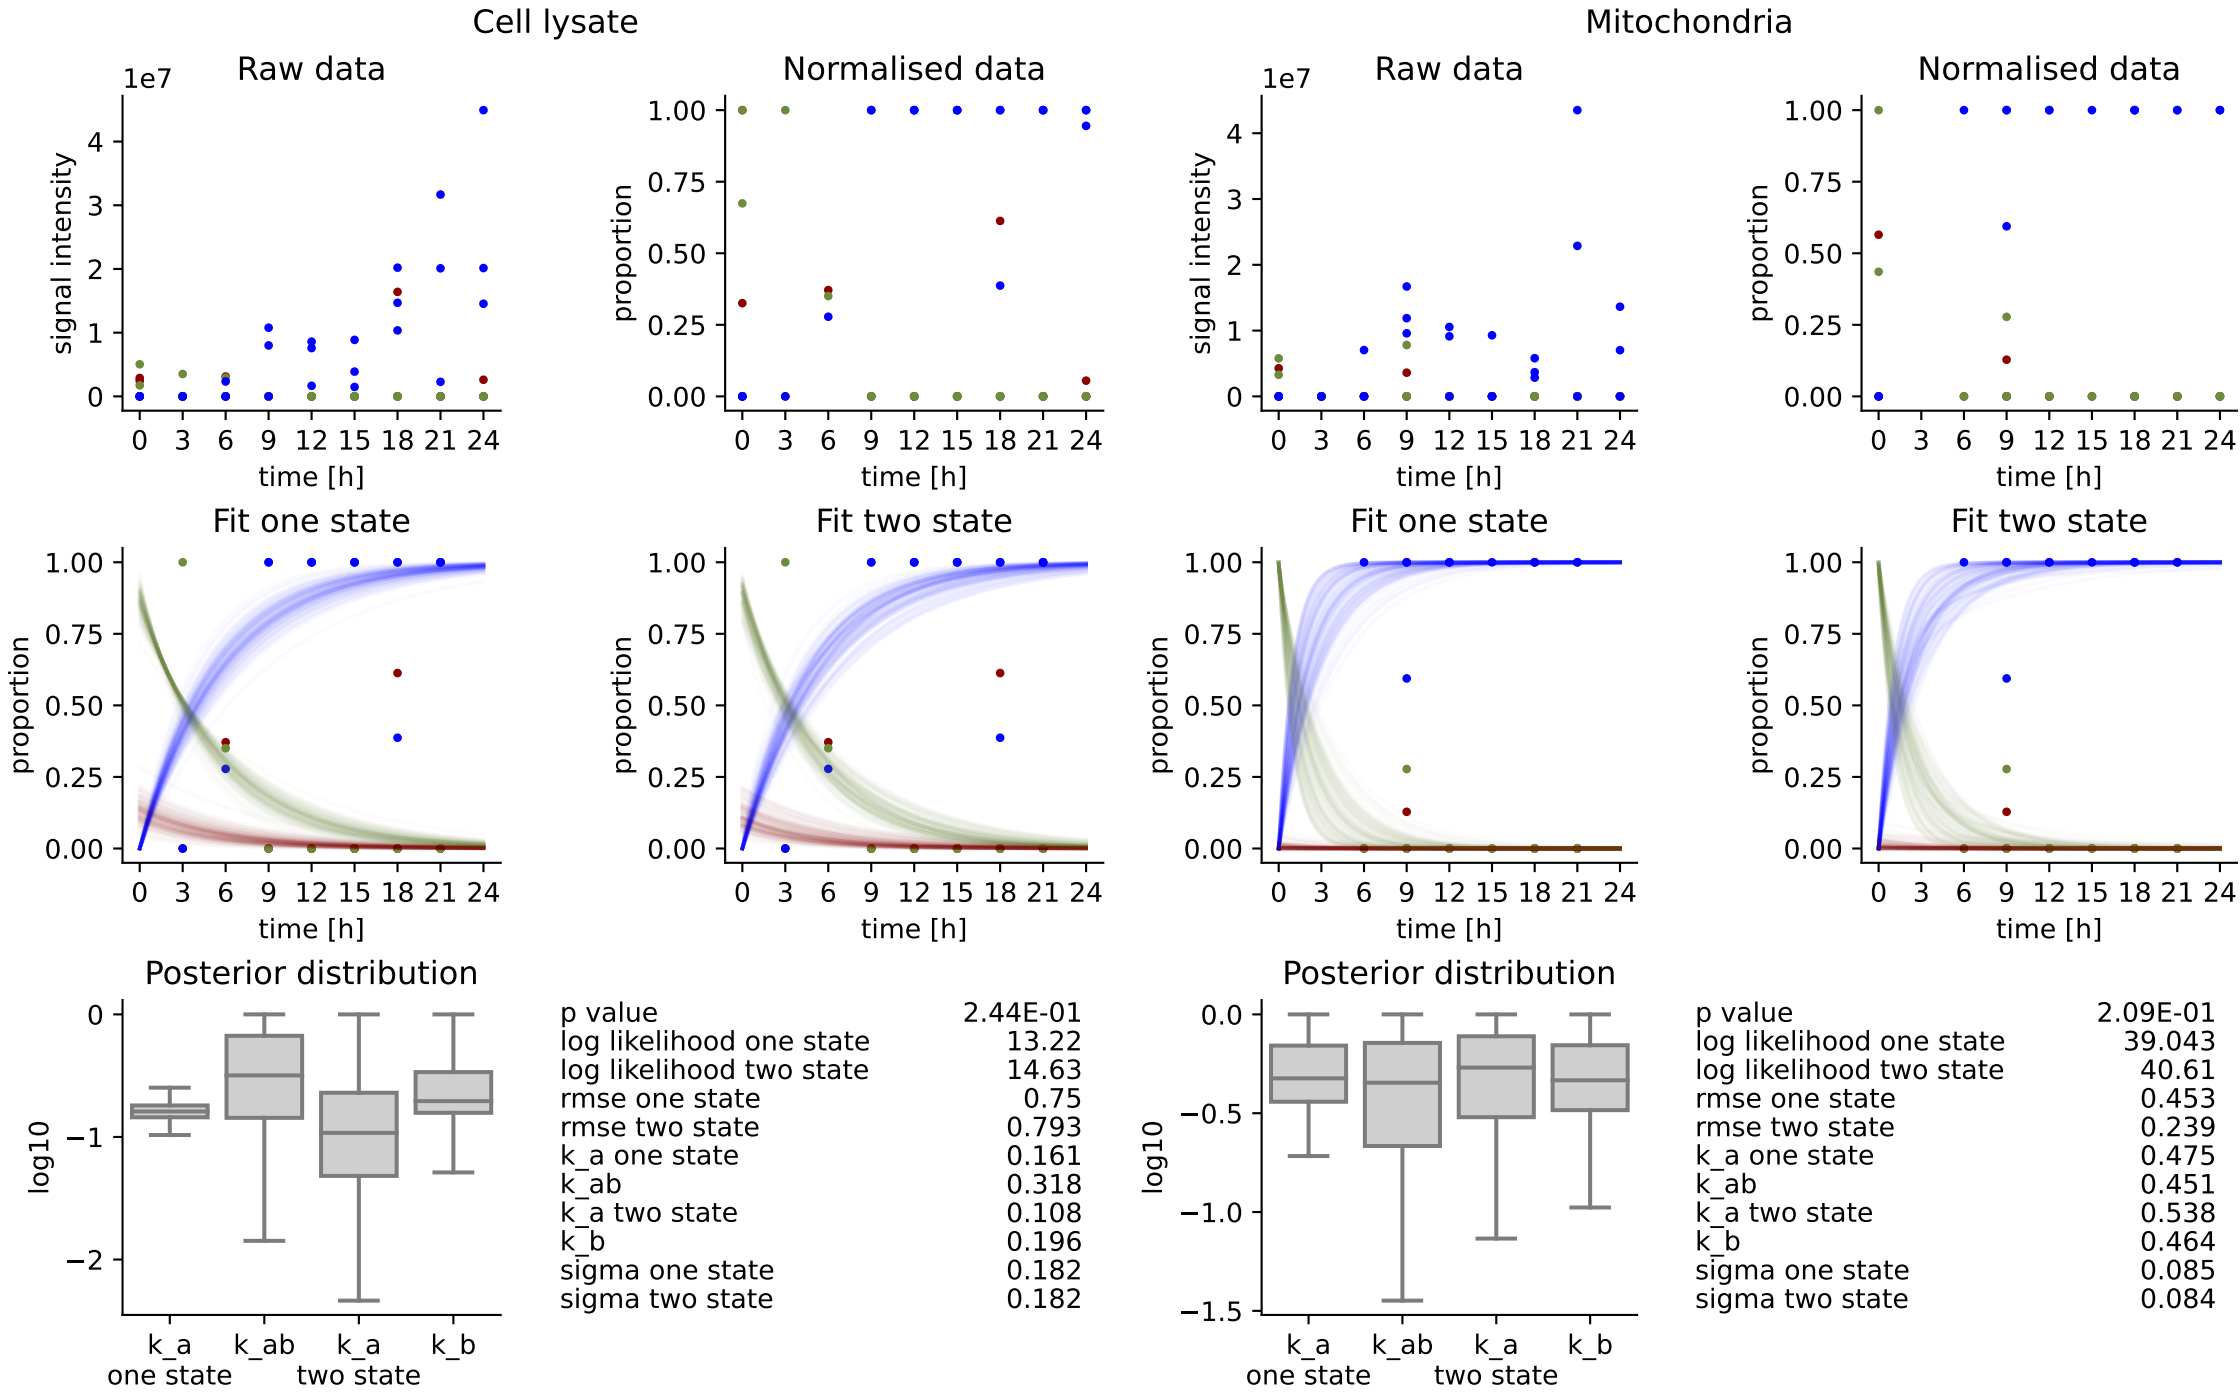

MCAT  
SLC25A20  
O43772  
Mitochondrial carnitine/acylcarnitine carrier protein

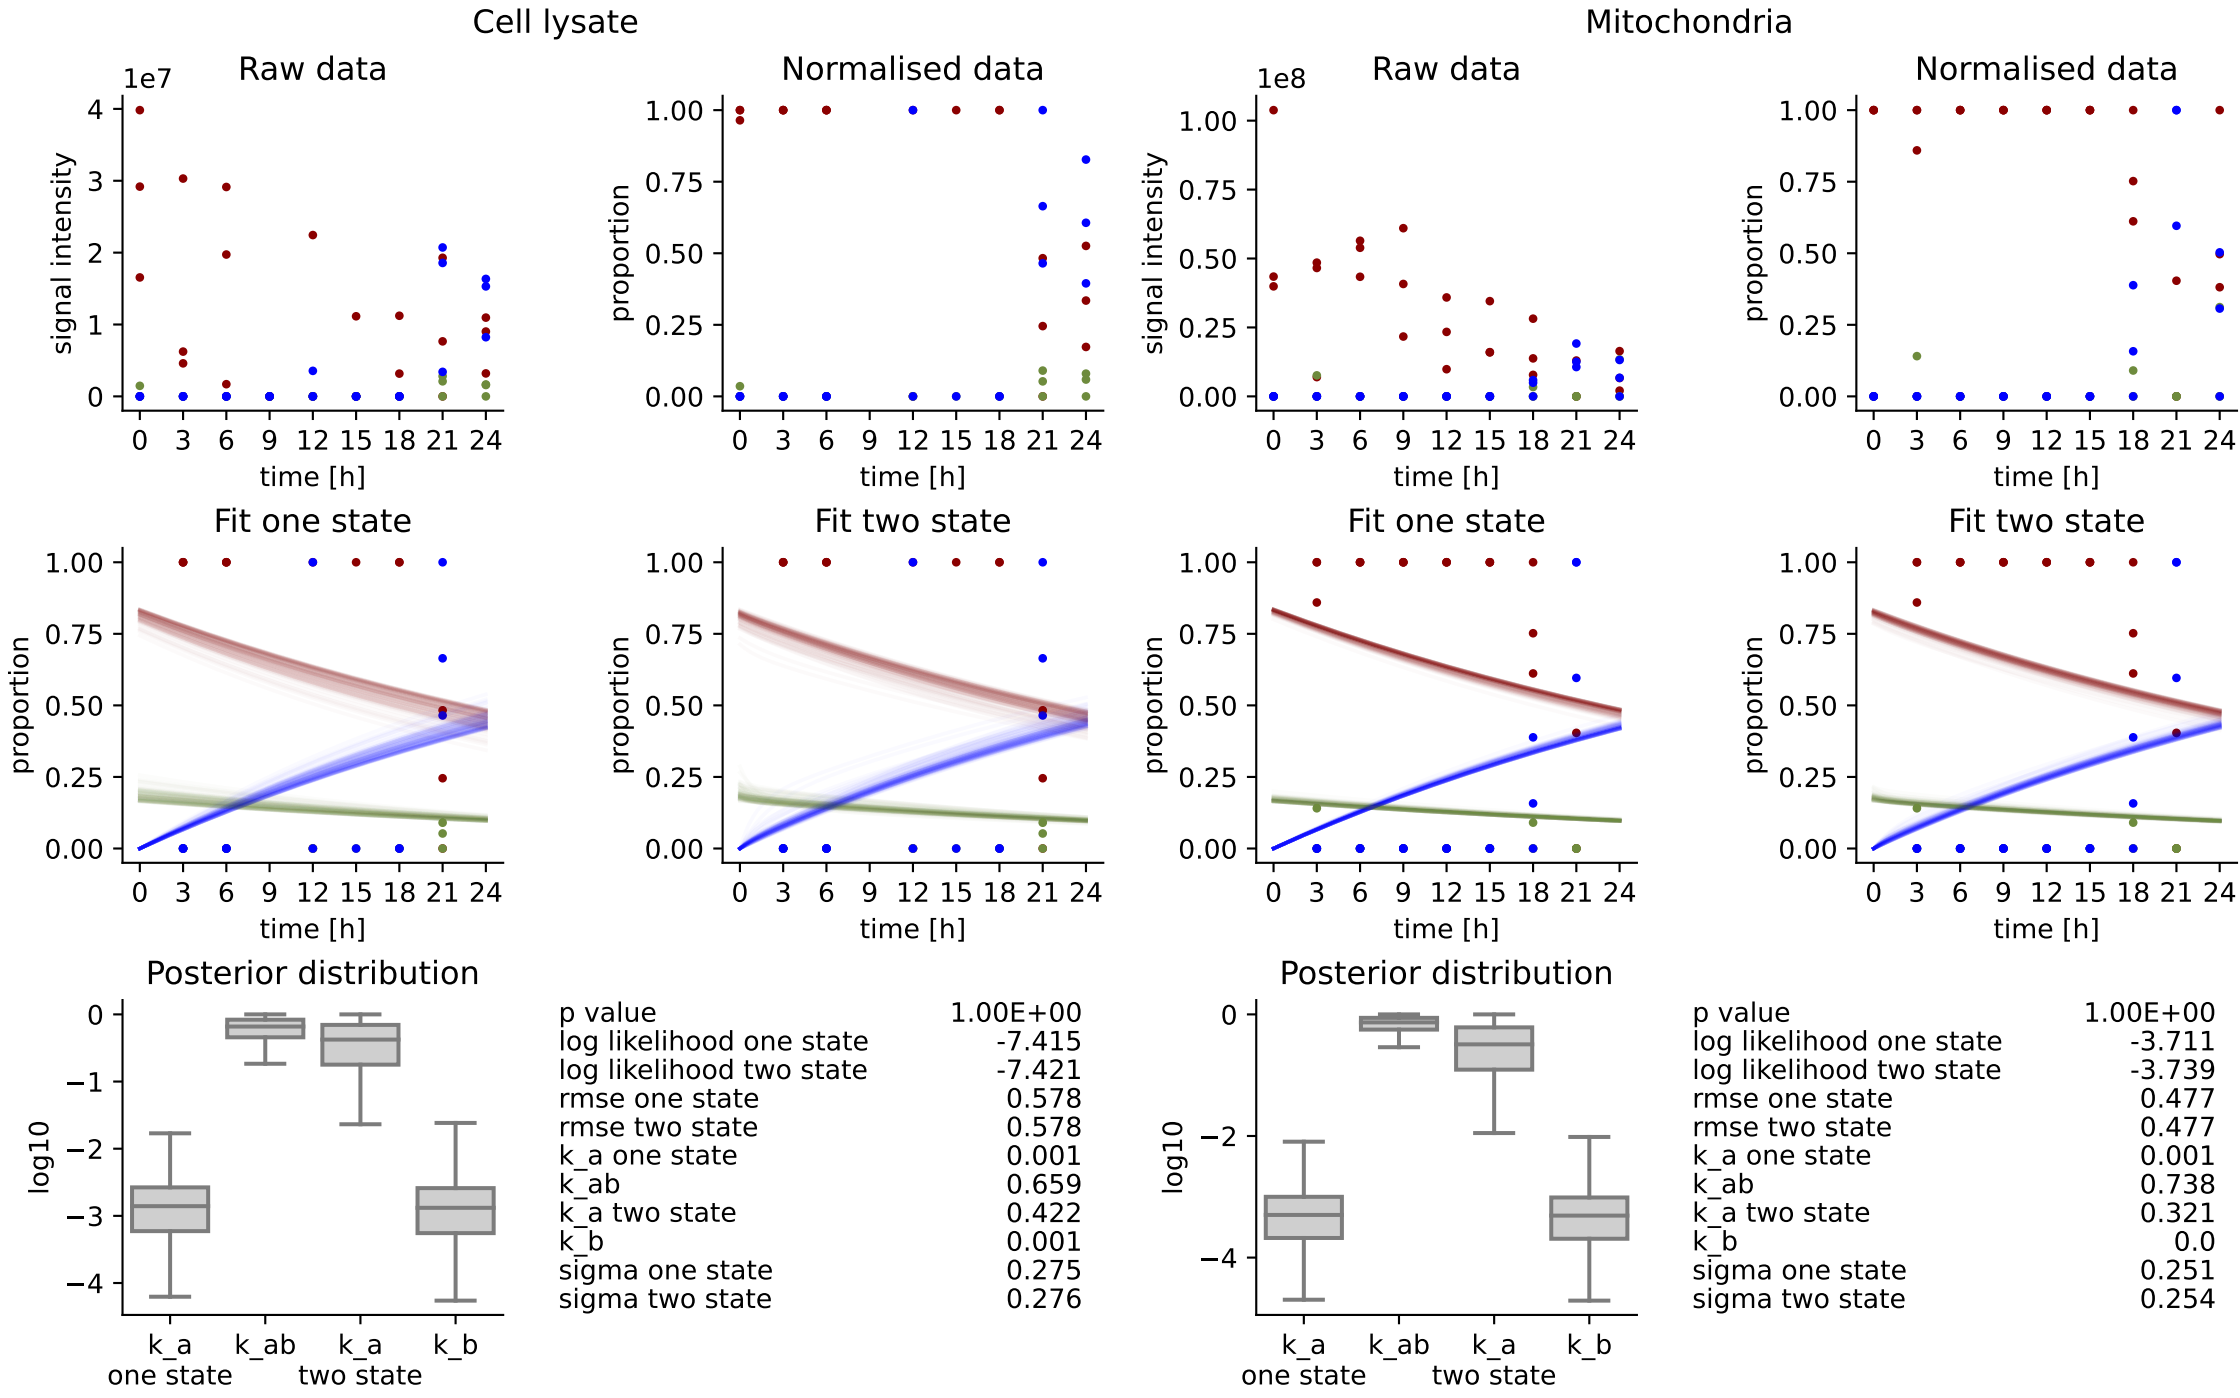

ERAL1  
ERAL1  
O75616  
GTPase Era, mitochondrial

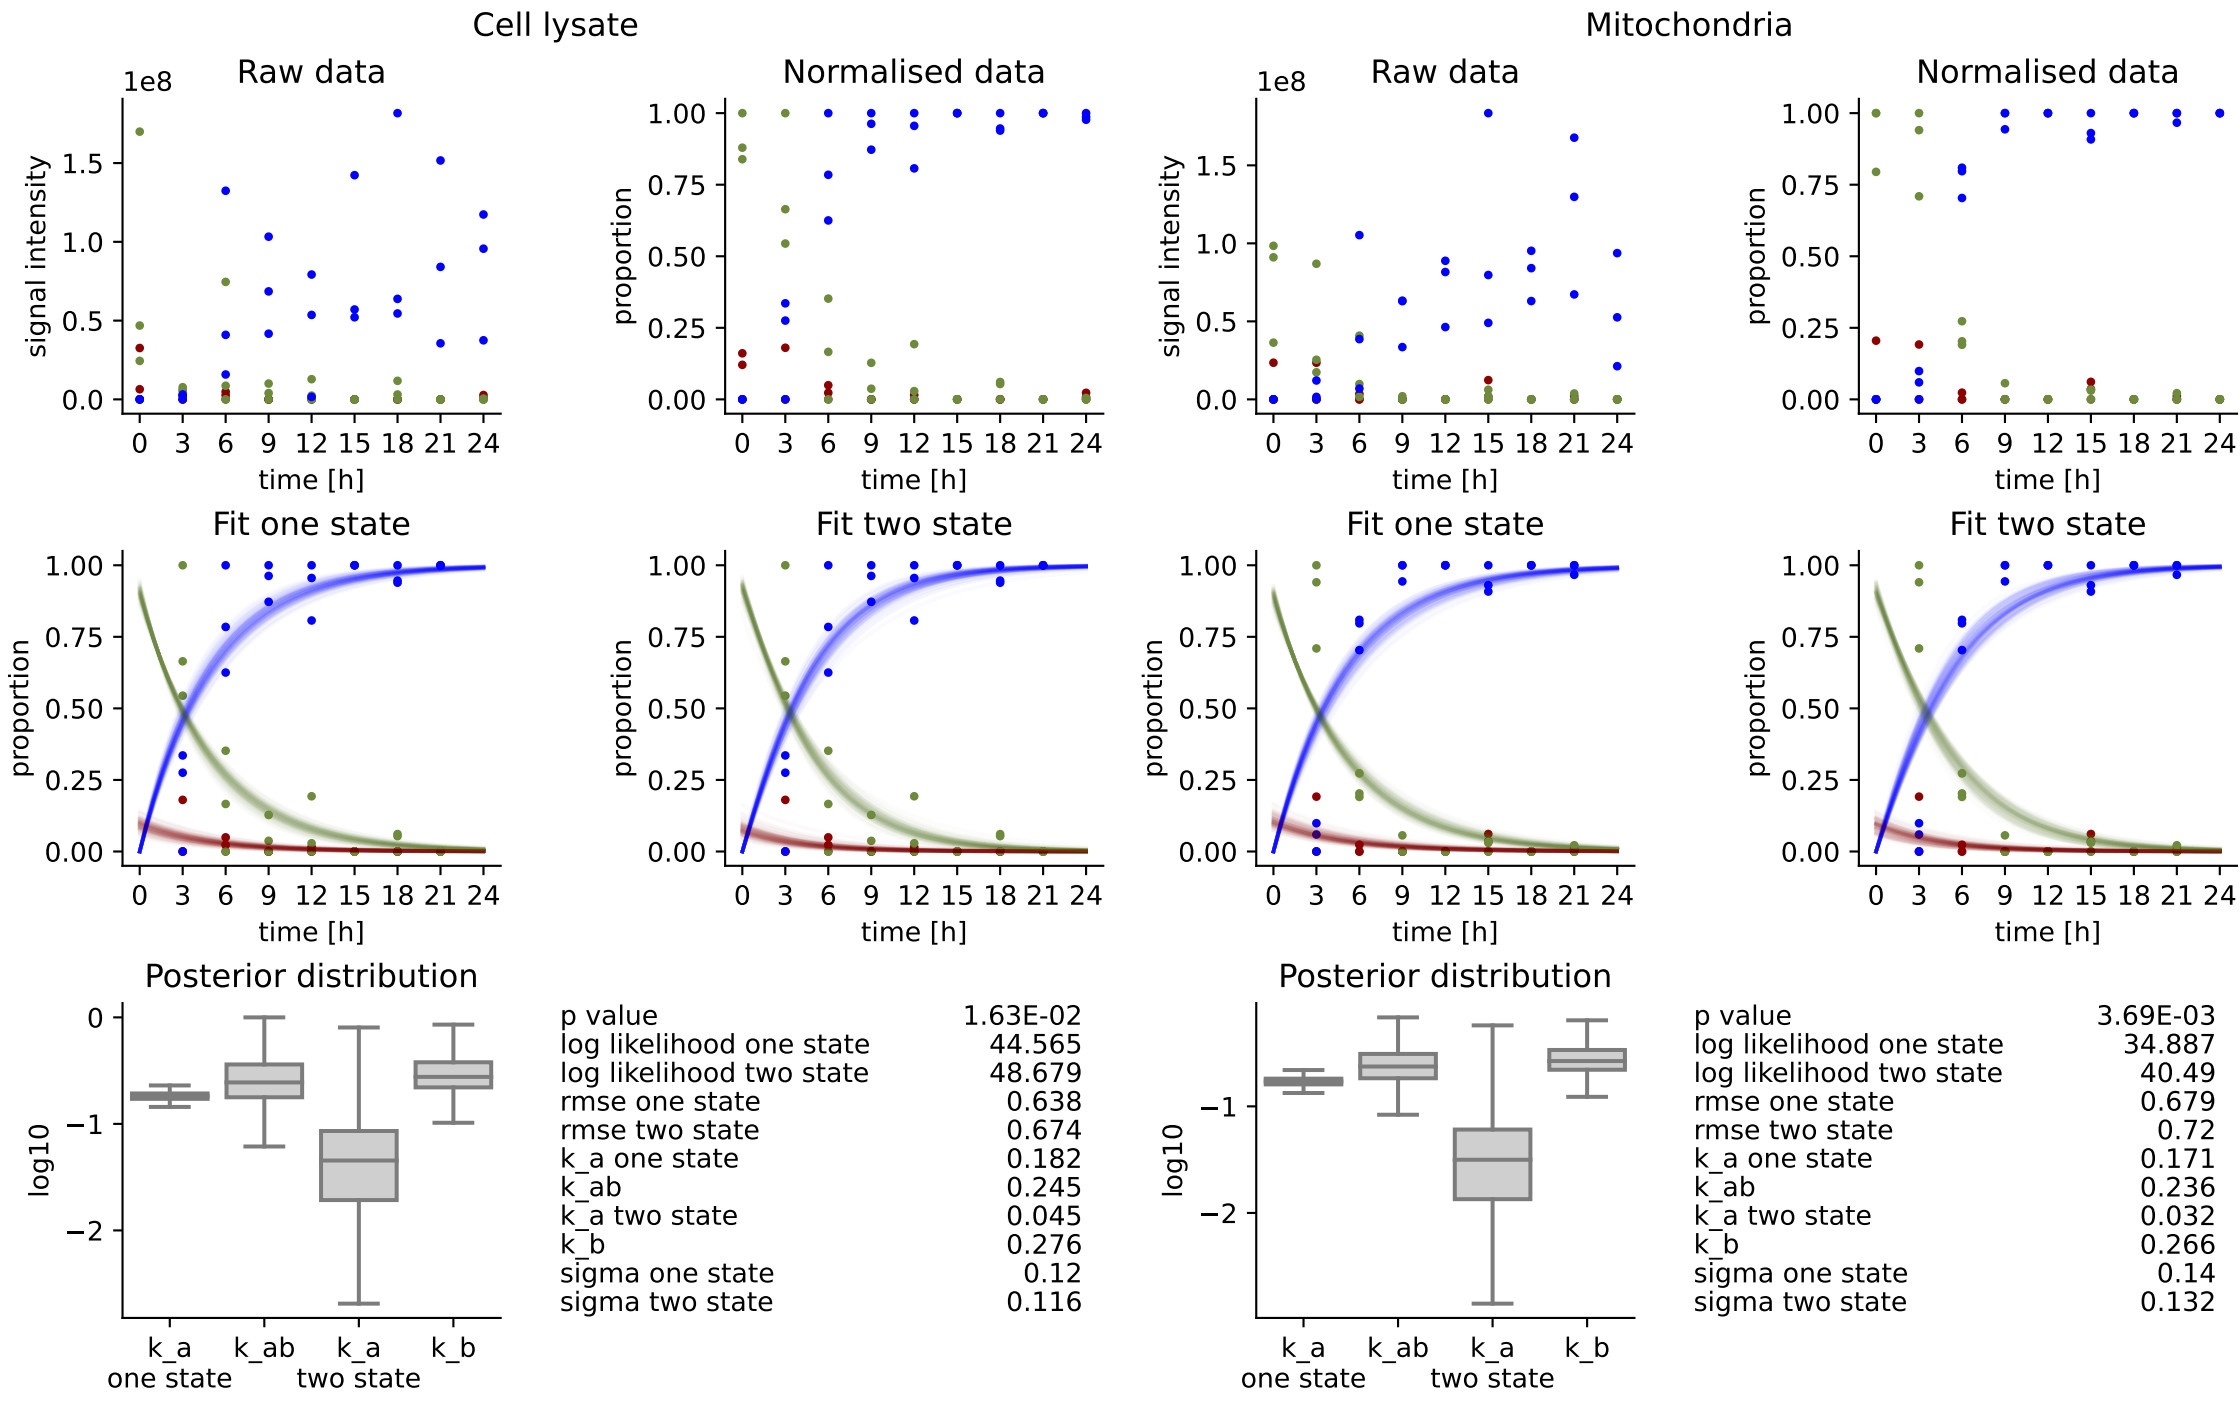



mtRBFA  
RBFA  
Q8NOV3  
Putative ribosome-binding factor A, mitochondrial

Cell lysate

Mitochondria

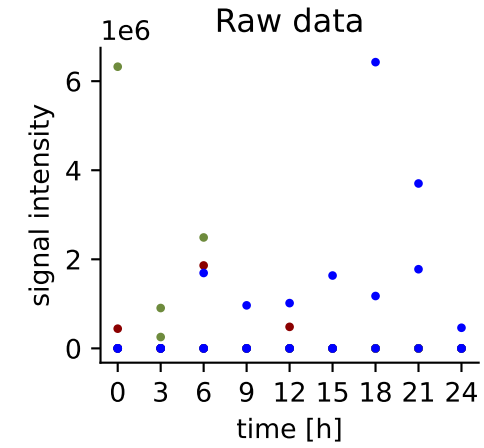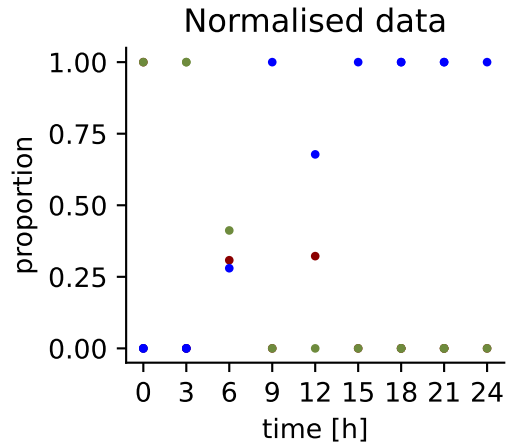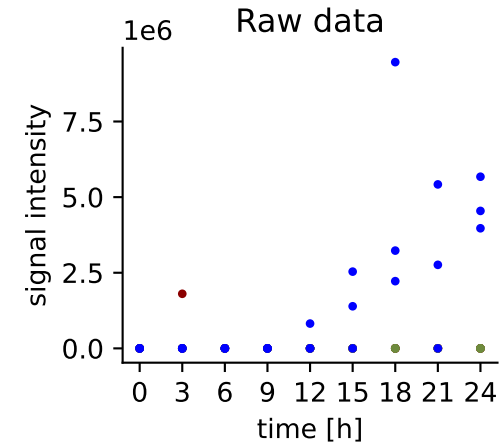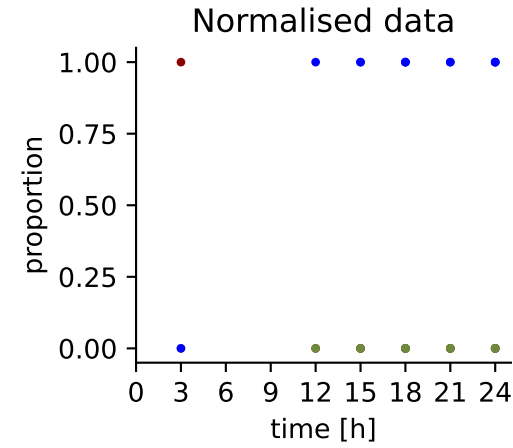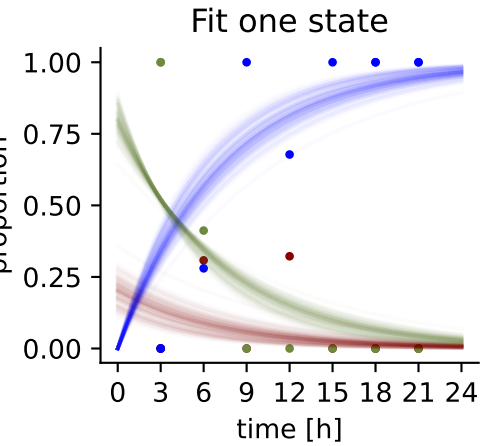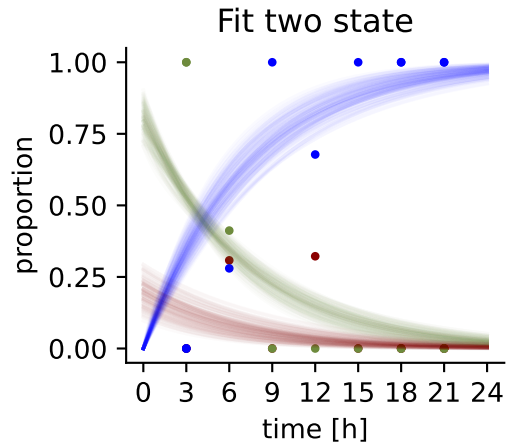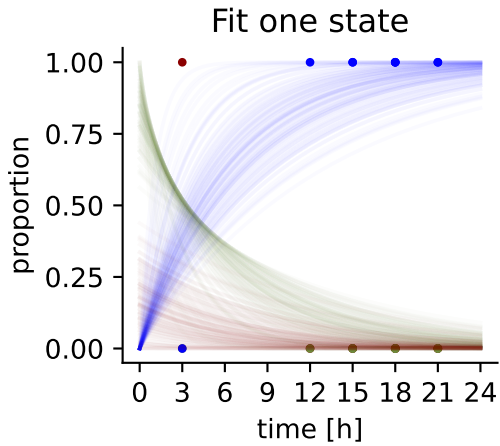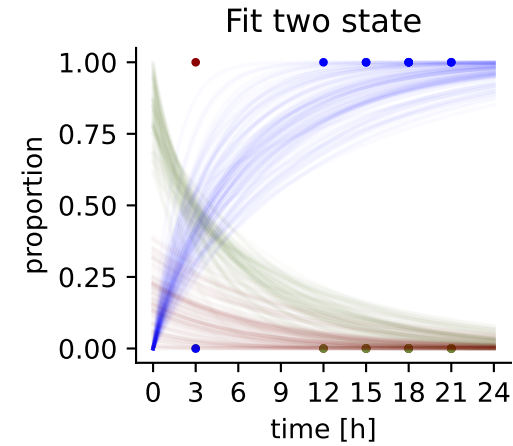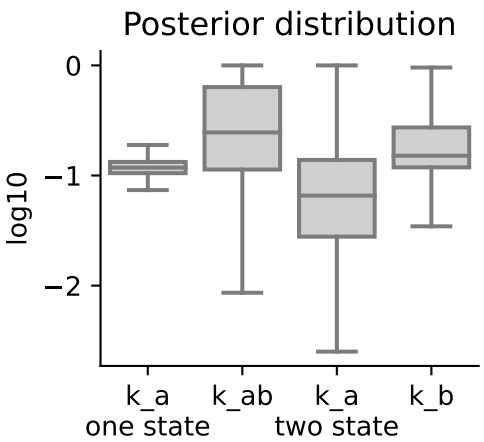

|                          |          |
|--------------------------|----------|
| p value                  | 1.37E-01 |
| log likelihood one state | 6.047    |
| log likelihood two state | 8.036    |
| rmse one state           | 0.747    |
| rmse two state           | 0.777    |
| k_a one state            | 0.118    |
| k_ab                     | 0.246    |
| k_a two state            | 0.066    |
| k_b                      | 0.151    |
| sigma one state          | 0.194    |
| sigma two state          | 0.192    |

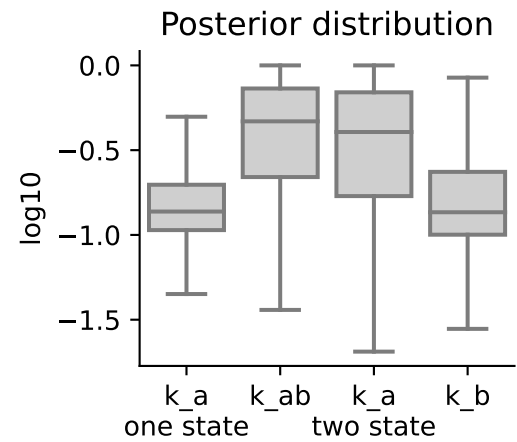

|                          |          |
|--------------------------|----------|
| p value                  | 7.70E-01 |
| log likelihood one state | 2.768    |
| log likelihood two state | 3.03     |
| rmse one state           | 0.889    |
| rmse two state           | 0.766    |
| k_a one state            | 0.137    |
| k_ab                     | 0.468    |
| k_a two state            | 0.405    |
| k_b                      | 0.136    |
| sigma one state          | 0.213    |
| sigma two state          | 0.213    |



MTG3  
NOA1  
Q8NC60  
Nitric oxide-associated protein 1

Cell lysate

Mitochondria

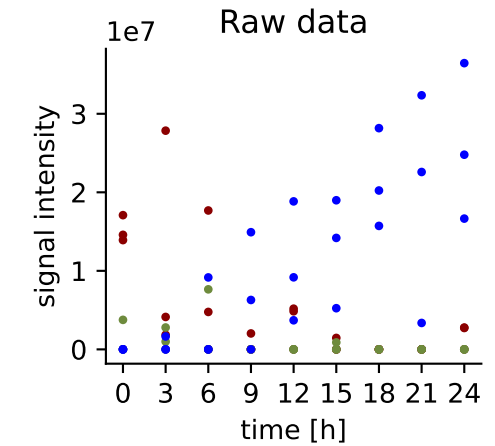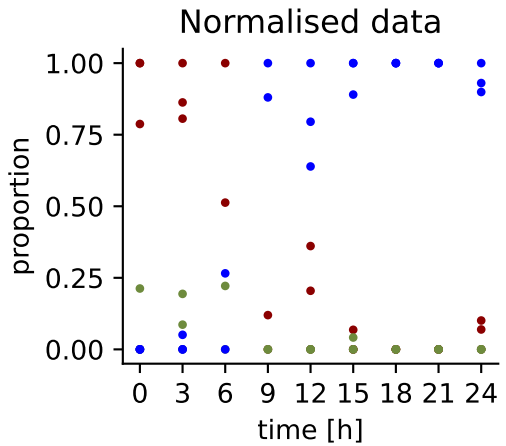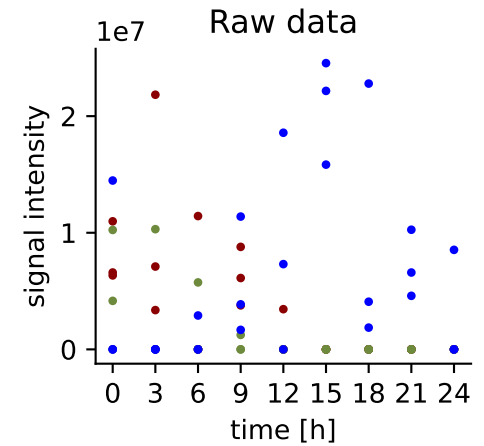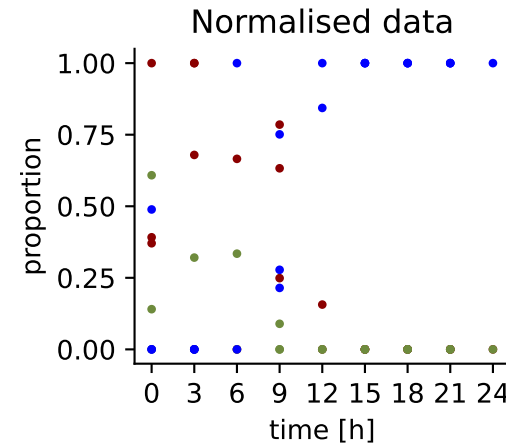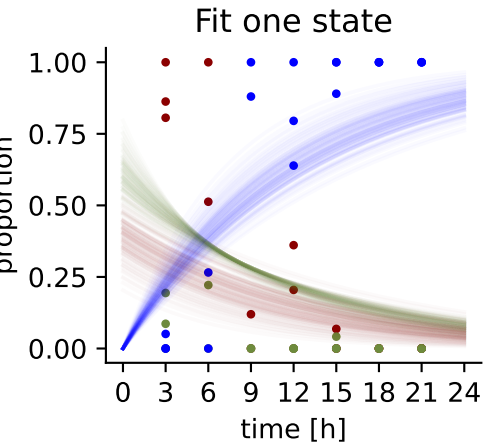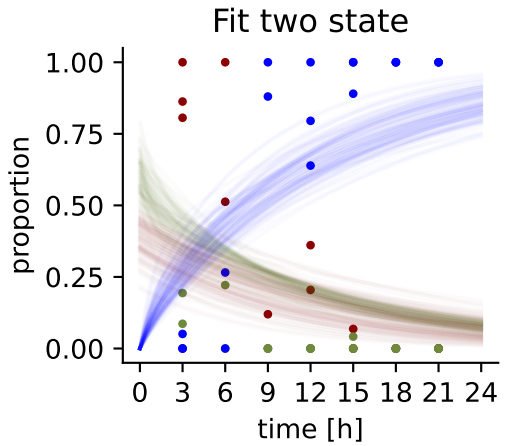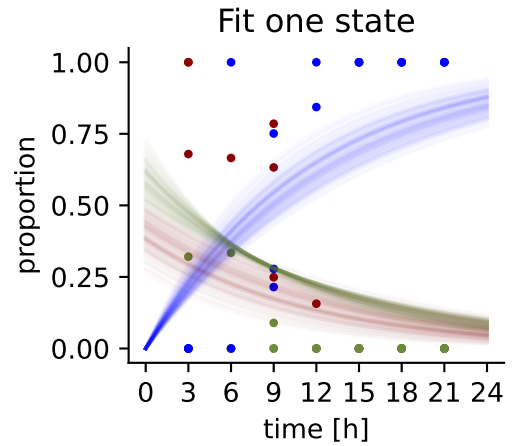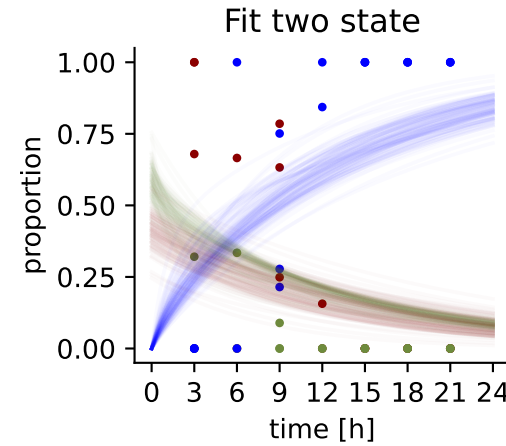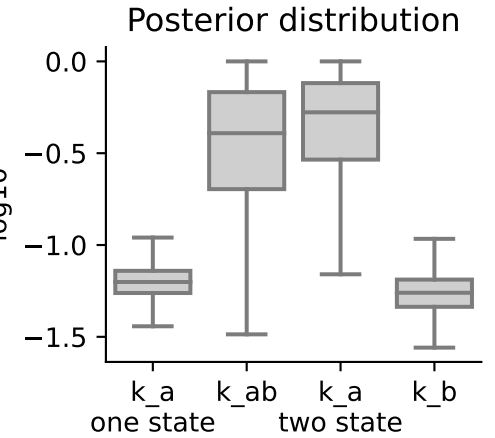

|                          |          |
|--------------------------|----------|
| p value                  | 1.82E-01 |
| log likelihood one state | -6.065   |
| log likelihood two state | -4.362   |
| rmse one state           | 0.857    |
| rmse two state           | 0.751    |
| k_a one state            | 0.063    |
| k_ab                     | 0.406    |
| k_a two state            | 0.528    |
| k_b                      | 0.055    |
| sigma one state          | 0.26     |
| sigma two state          | 0.257    |

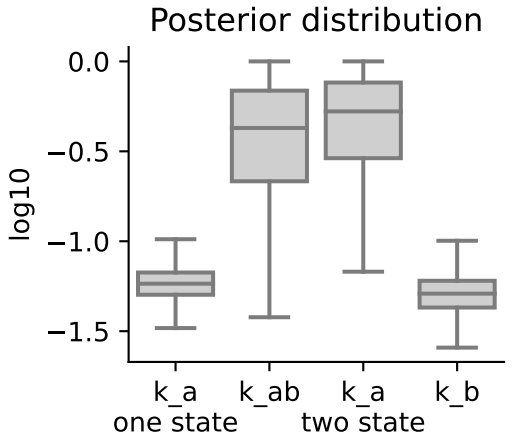

|                          |          |
|--------------------------|----------|
| p value                  | 2.54E-01 |
| log likelihood one state | -8.829   |
| log likelihood two state | -7.459   |
| rmse one state           | 0.855    |
| rmse two state           | 0.76     |
| k_a one state            | 0.058    |
| k_ab                     | 0.426    |
| k_a two state            | 0.527    |
| k_b                      | 0.051    |
| sigma one state          | 0.271    |
| sigma two state          | 0.269    |

mtIF3  
MTIF3  
Q9H2K0

Translation initiation factor IF-3, mitochondrial

Cell lysate

Mitochondria

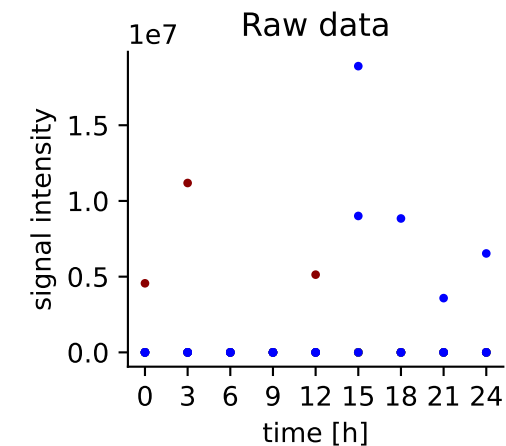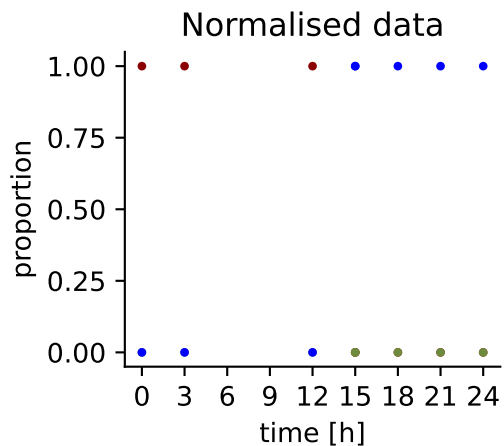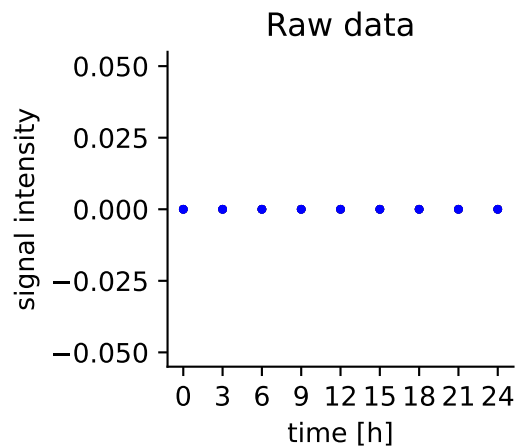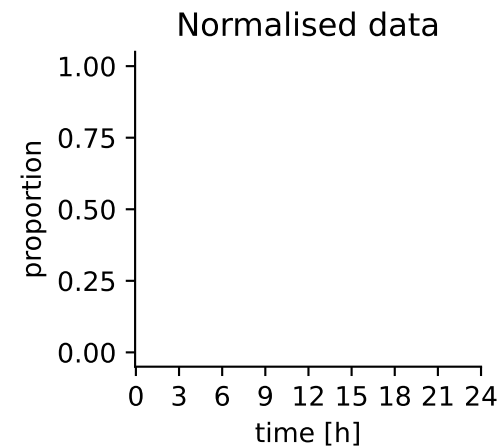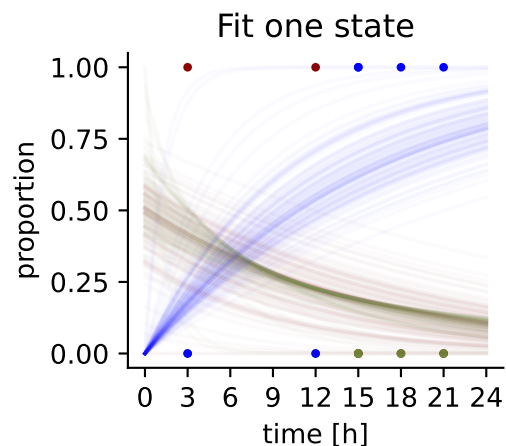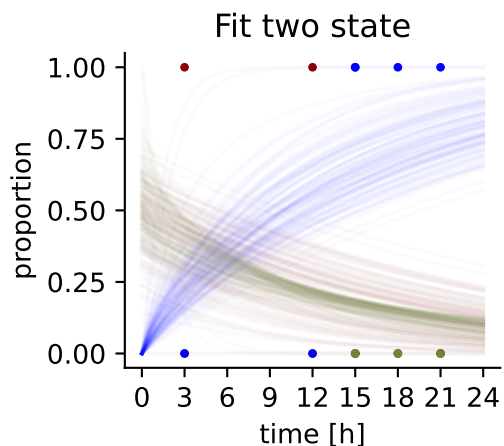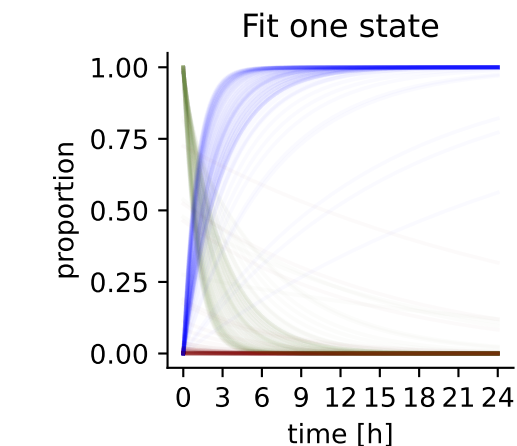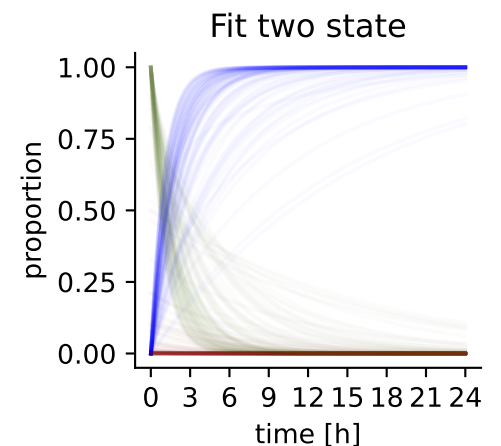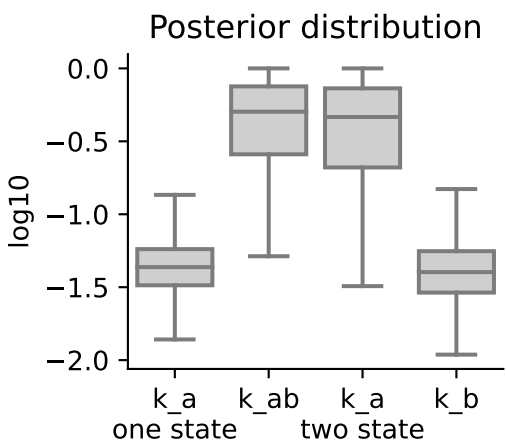

|                          |          |
|--------------------------|----------|
| p value                  | 9.09E-01 |
| log likelihood one state | -6.38    |
| log likelihood two state | -6.285   |
| rmse one state           | 0.928    |
| rmse two state           | 0.903    |
| k_a one state            | 0.043    |
| k_ab                     | 0.505    |
| k_a two state            | 0.464    |
| k_b                      | 0.04     |
| sigma one state          | 0.298    |
| sigma two state          | 0.297    |

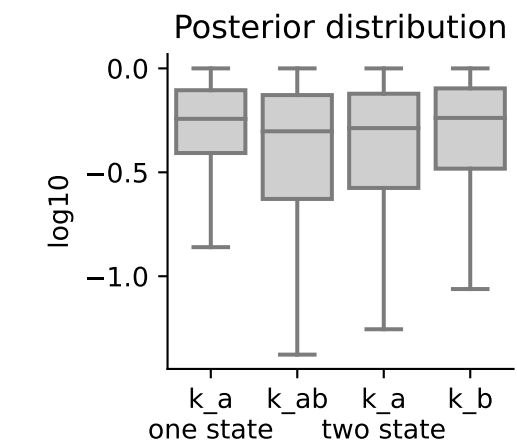

|                          |          |
|--------------------------|----------|
| p value                  | 1.00E+00 |
| log likelihood one state | 0.0      |
| log likelihood two state | 0.0      |
| rmse one state           | nan      |
| rmse two state           | nan      |
| k_a one state            | 0.572    |
| k_ab                     | 0.498    |
| k_a two state            | 0.516    |
| k_b                      | 0.578    |
| sigma one state          | 0.074    |
| sigma two state          | 0.092    |

mtIF2  
MTIF2  
P46199

Translation initiation factor IF-2, mitochondrial

Cell lysate

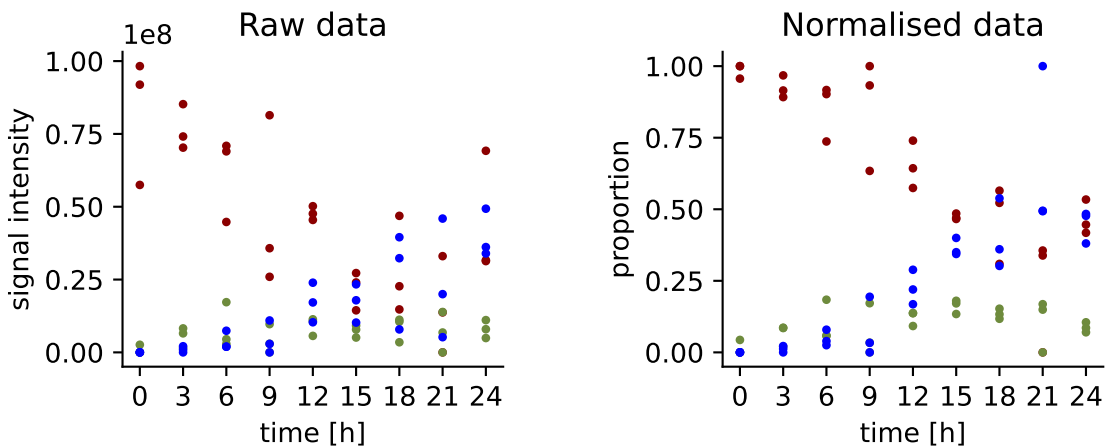

Mitochondria

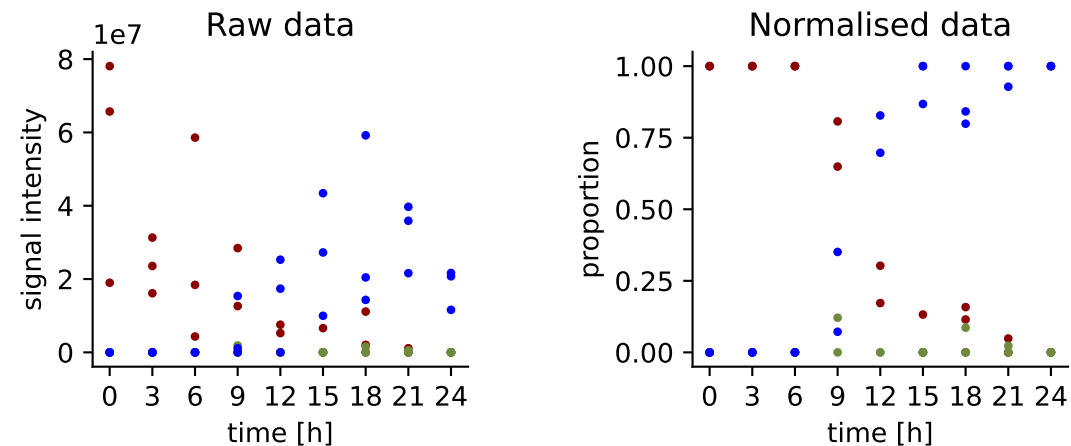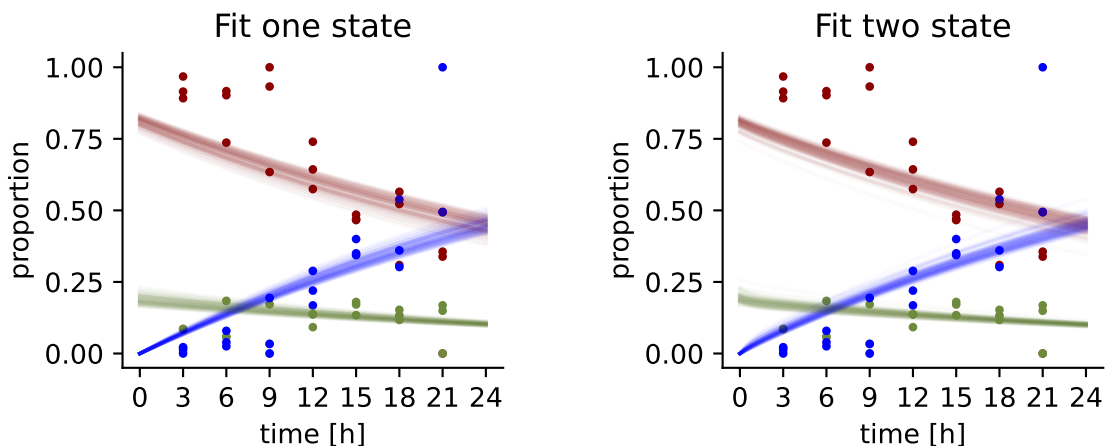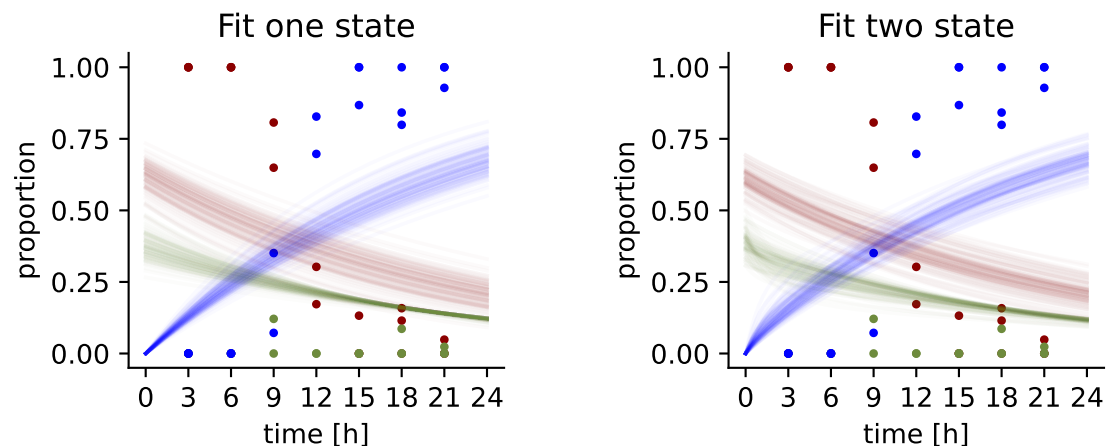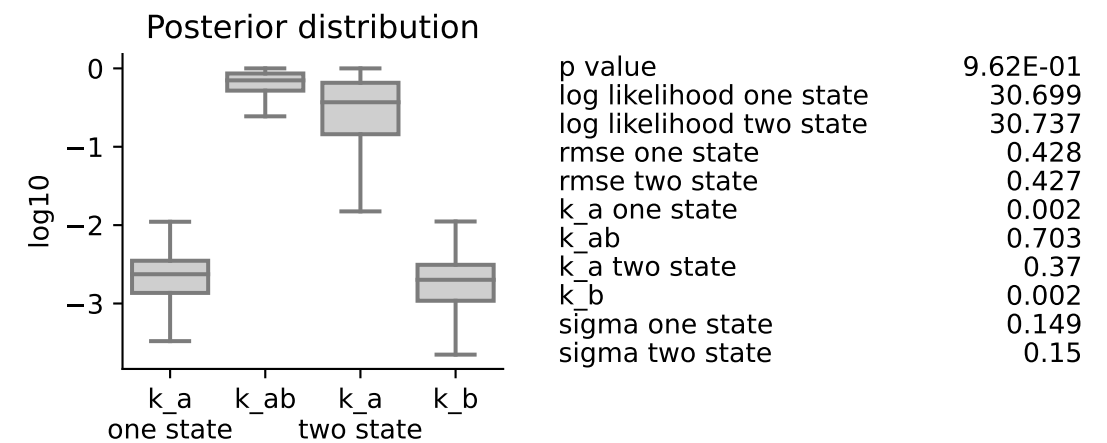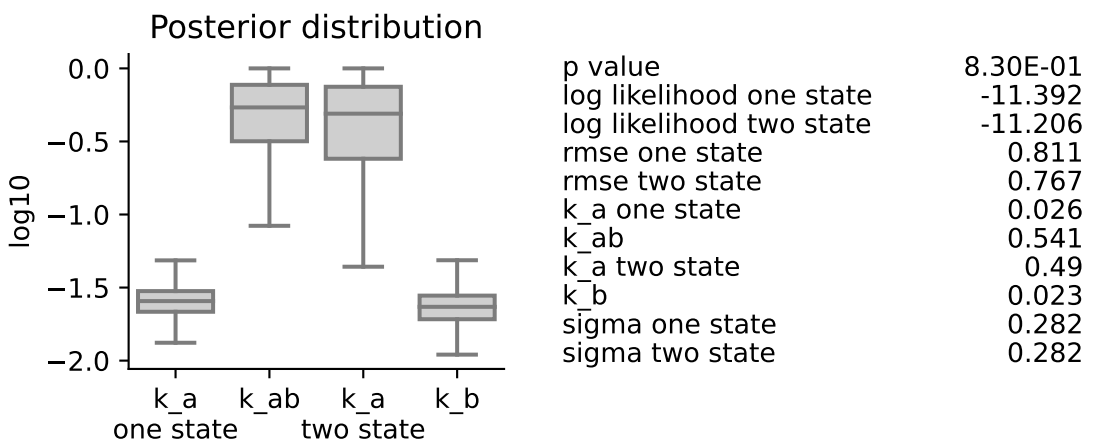

MRM2  
FTSJ2  
Q9UI43  
rRNA methyltransferase 2, mitochondrial

Cell lysate

Mitochondria

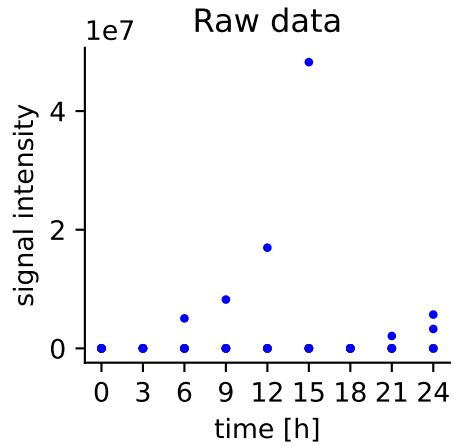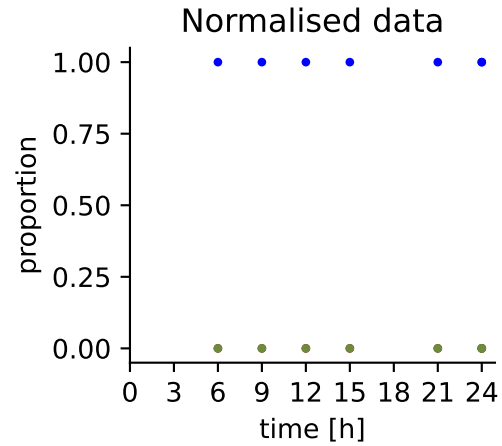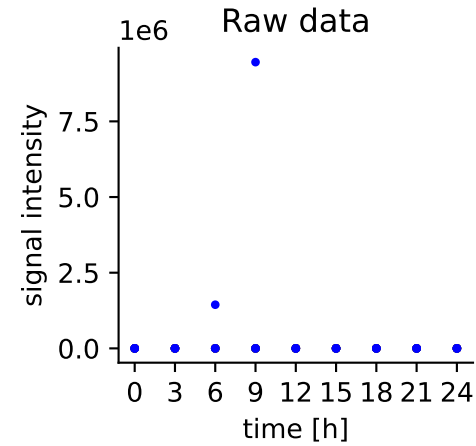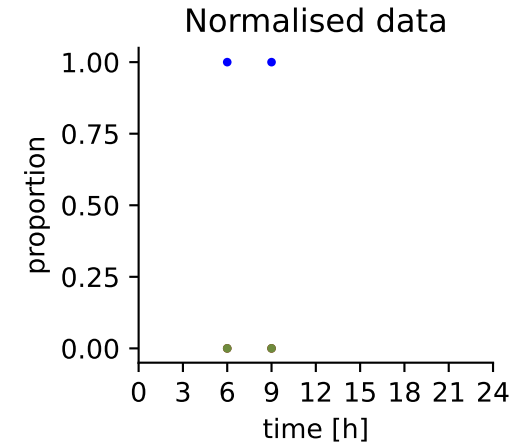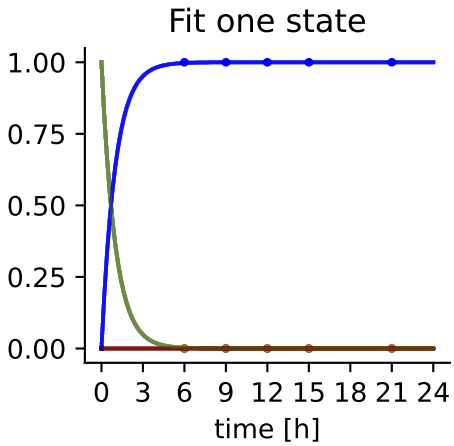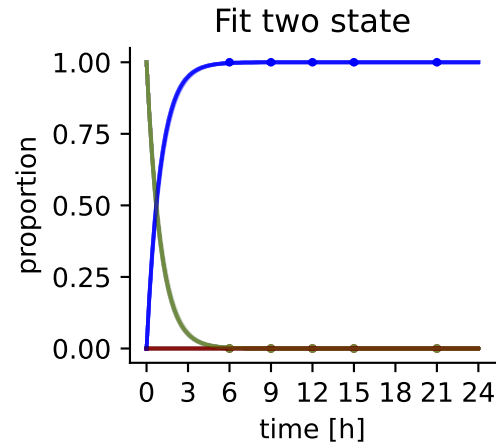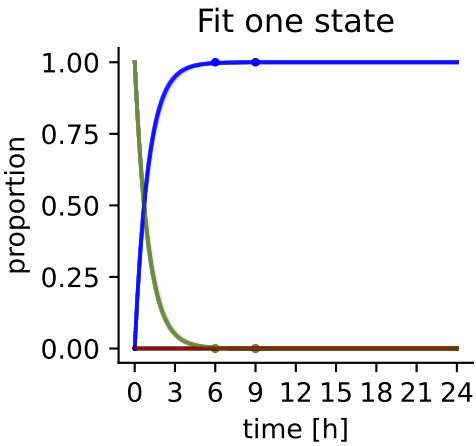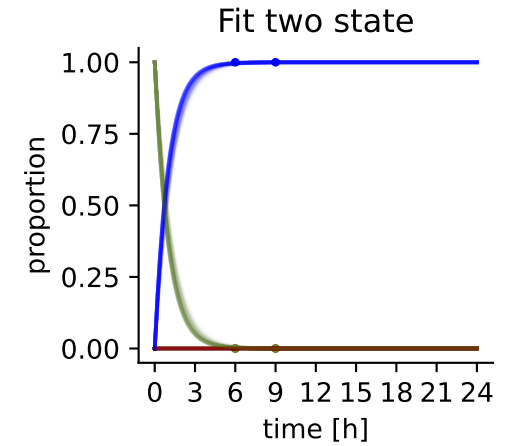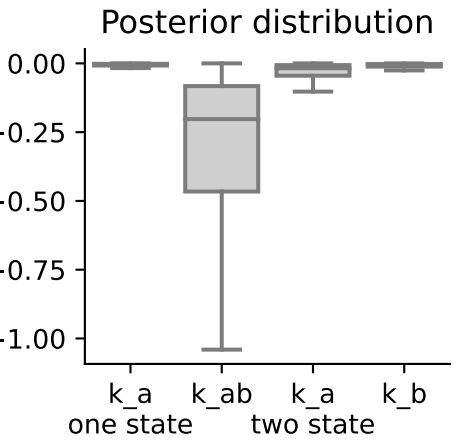

|                          |          |
|--------------------------|----------|
| p value                  | 1.00E+00 |
| log likelihood one state | 85.836   |
| log likelihood two state | 85.808   |
| rmse one state           | 0.066    |
| rmse two state           | 0.066    |
| k_a one state            | 0.991    |
| k_ab                     | 0.627    |
| k_a two state            | 0.96     |
| k_b                      | 0.987    |
| sigma one state          | 0.001    |
| sigma two state          | 0.001    |

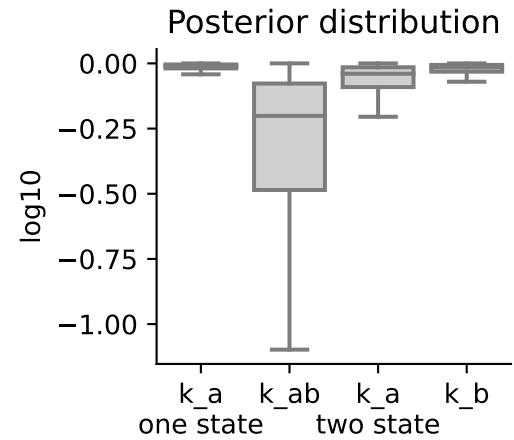

|                          |          |
|--------------------------|----------|
| p value                  | 1.00E+00 |
| log likelihood one state | 31.585   |
| log likelihood two state | 31.561   |
| rmse one state           | 0.066    |
| rmse two state           | 0.066    |
| k_a one state            | 0.978    |
| k_ab                     | 0.629    |
| k_a two state            | 0.913    |
| k_b                      | 0.966    |
| sigma one state          | 0.002    |
| sigma two state          | 0.002    |

MRM3  
RNMTL1  
Q9HC36  
rRNA methyltransferase 3, mitochondrial

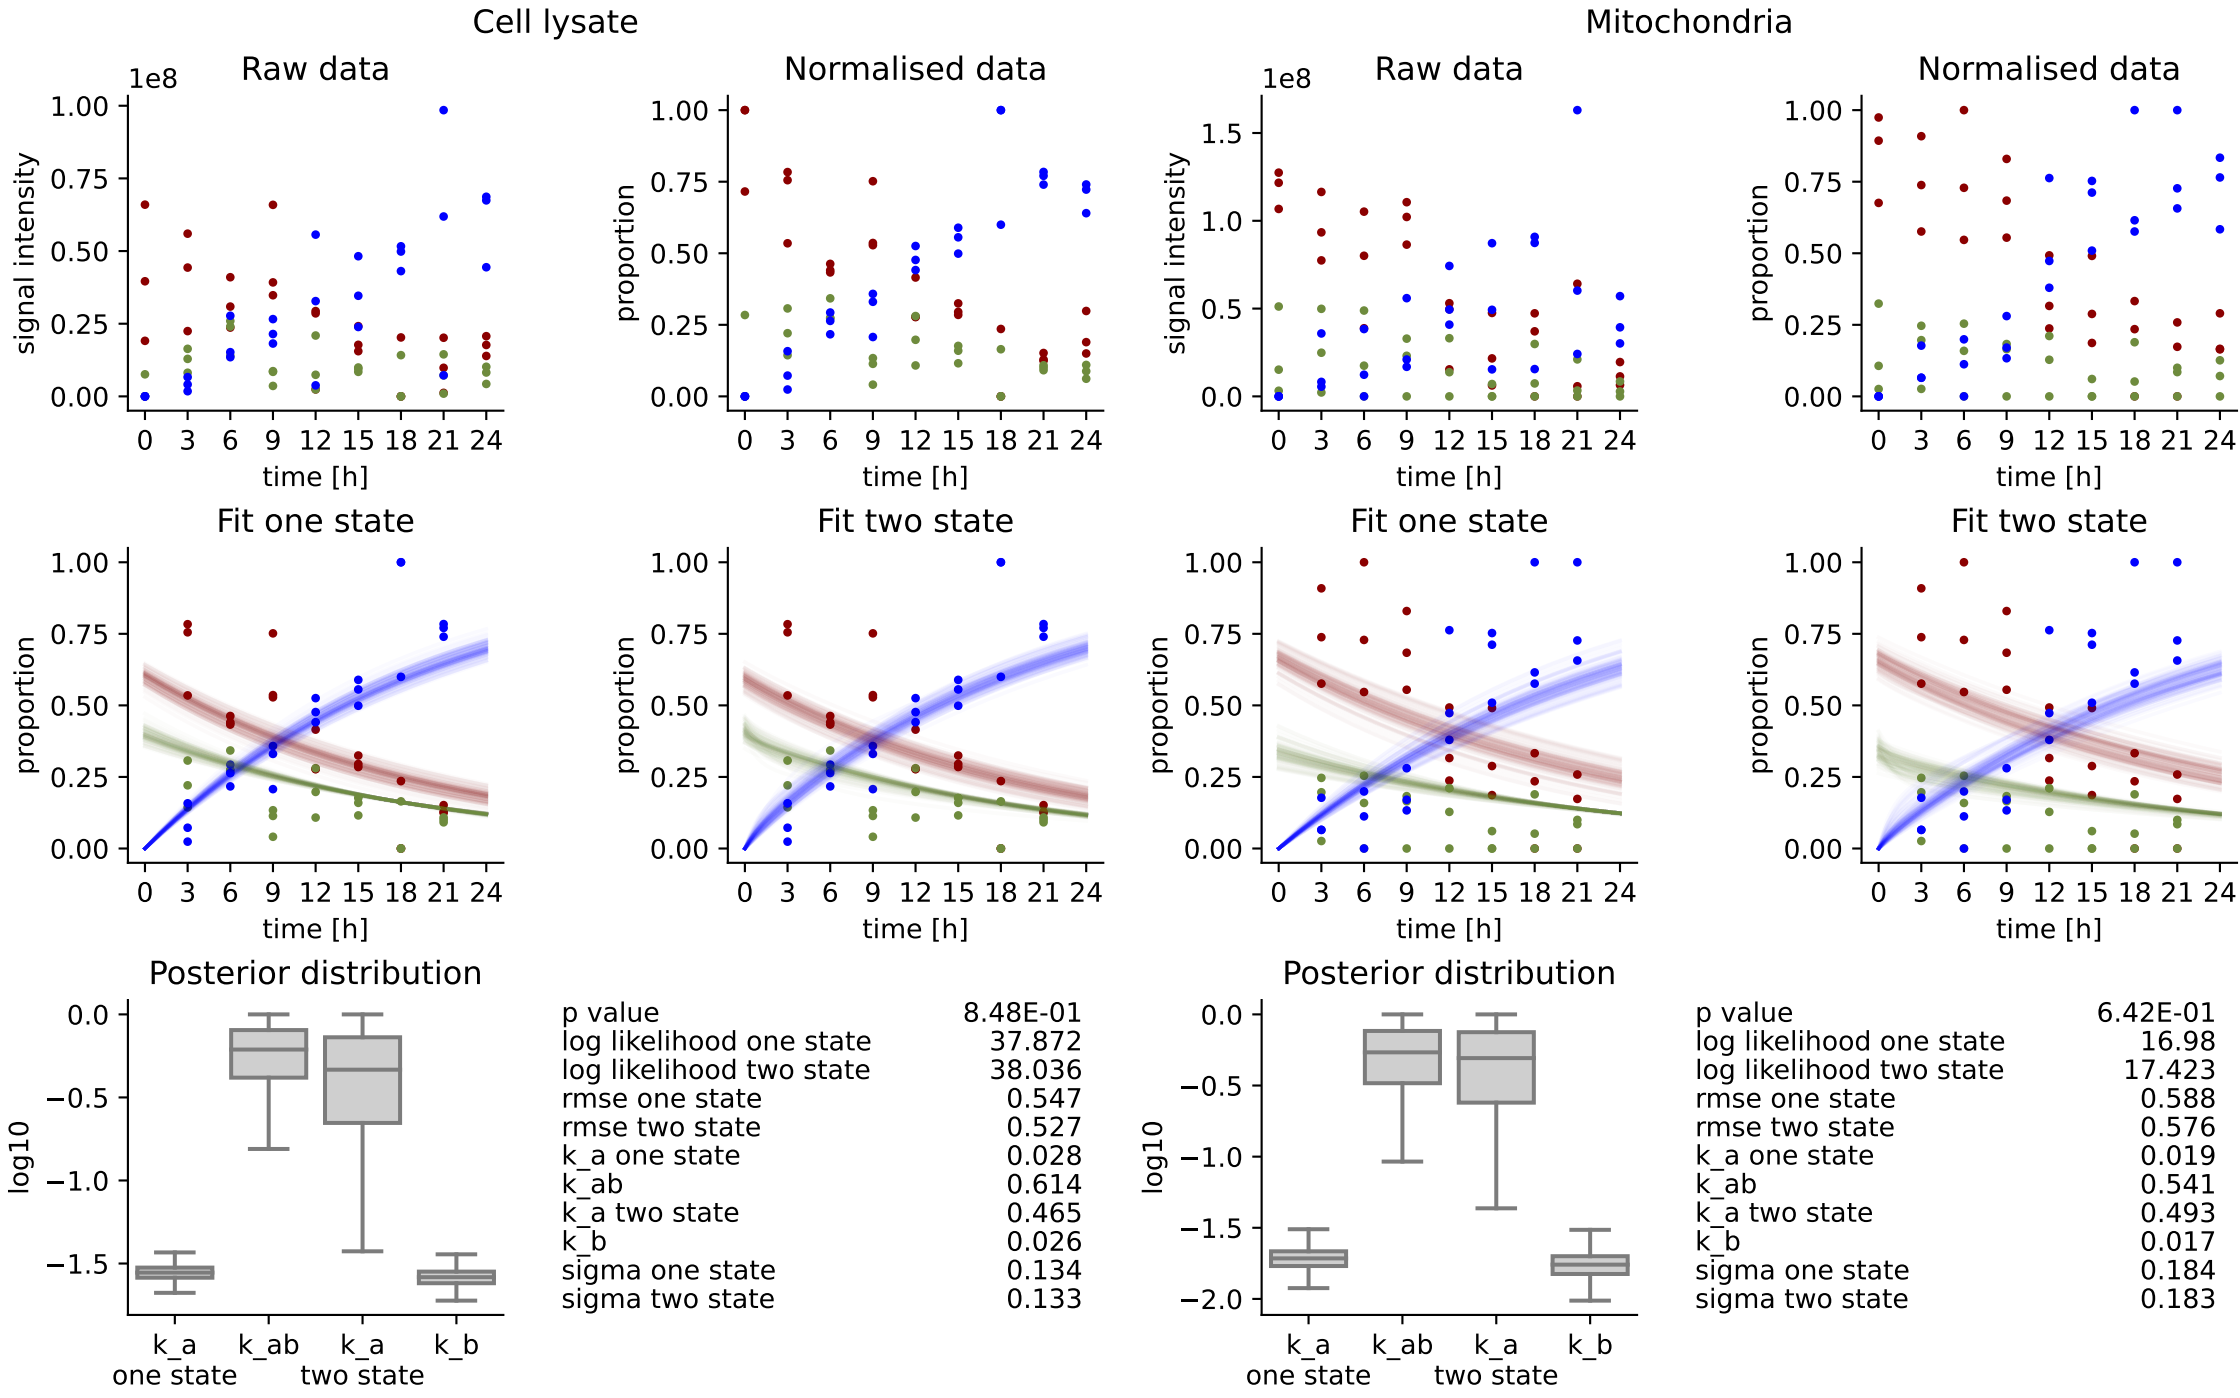

RPUSD4  
 RPUSD4  
 Q96CM3  
 RNA pseudouridylate synthase domain-containing protein 4

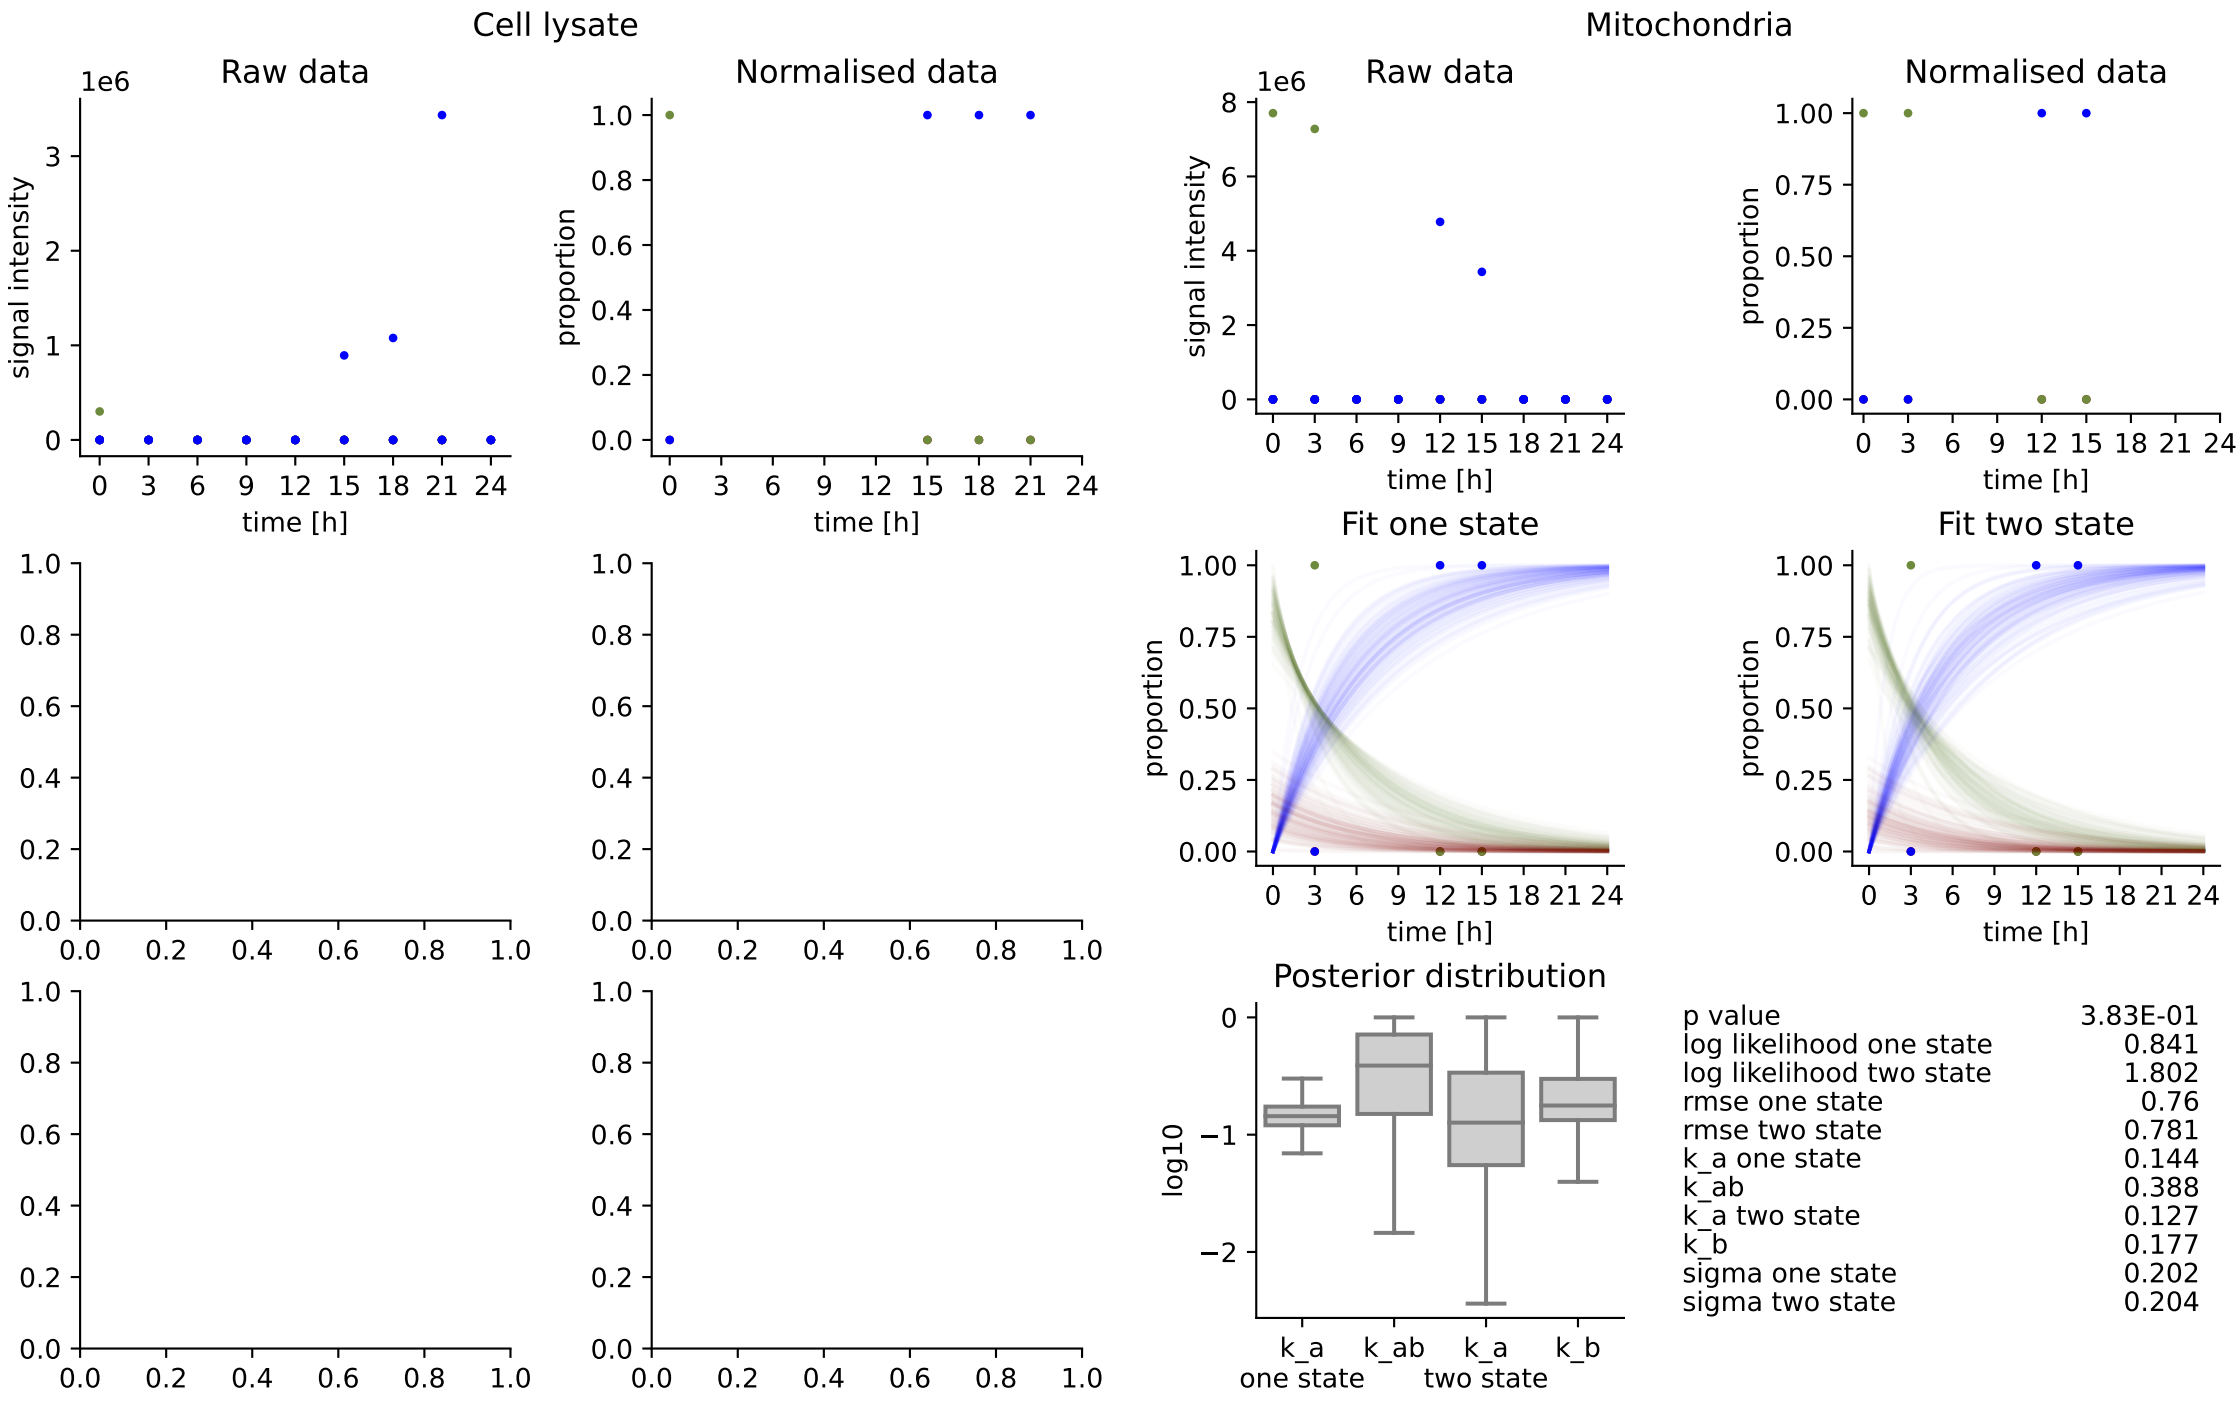

MALSU1  
MALSU1  
Q96EH3

### Mitochondrial assembly of ribosomal large subunit protein 1

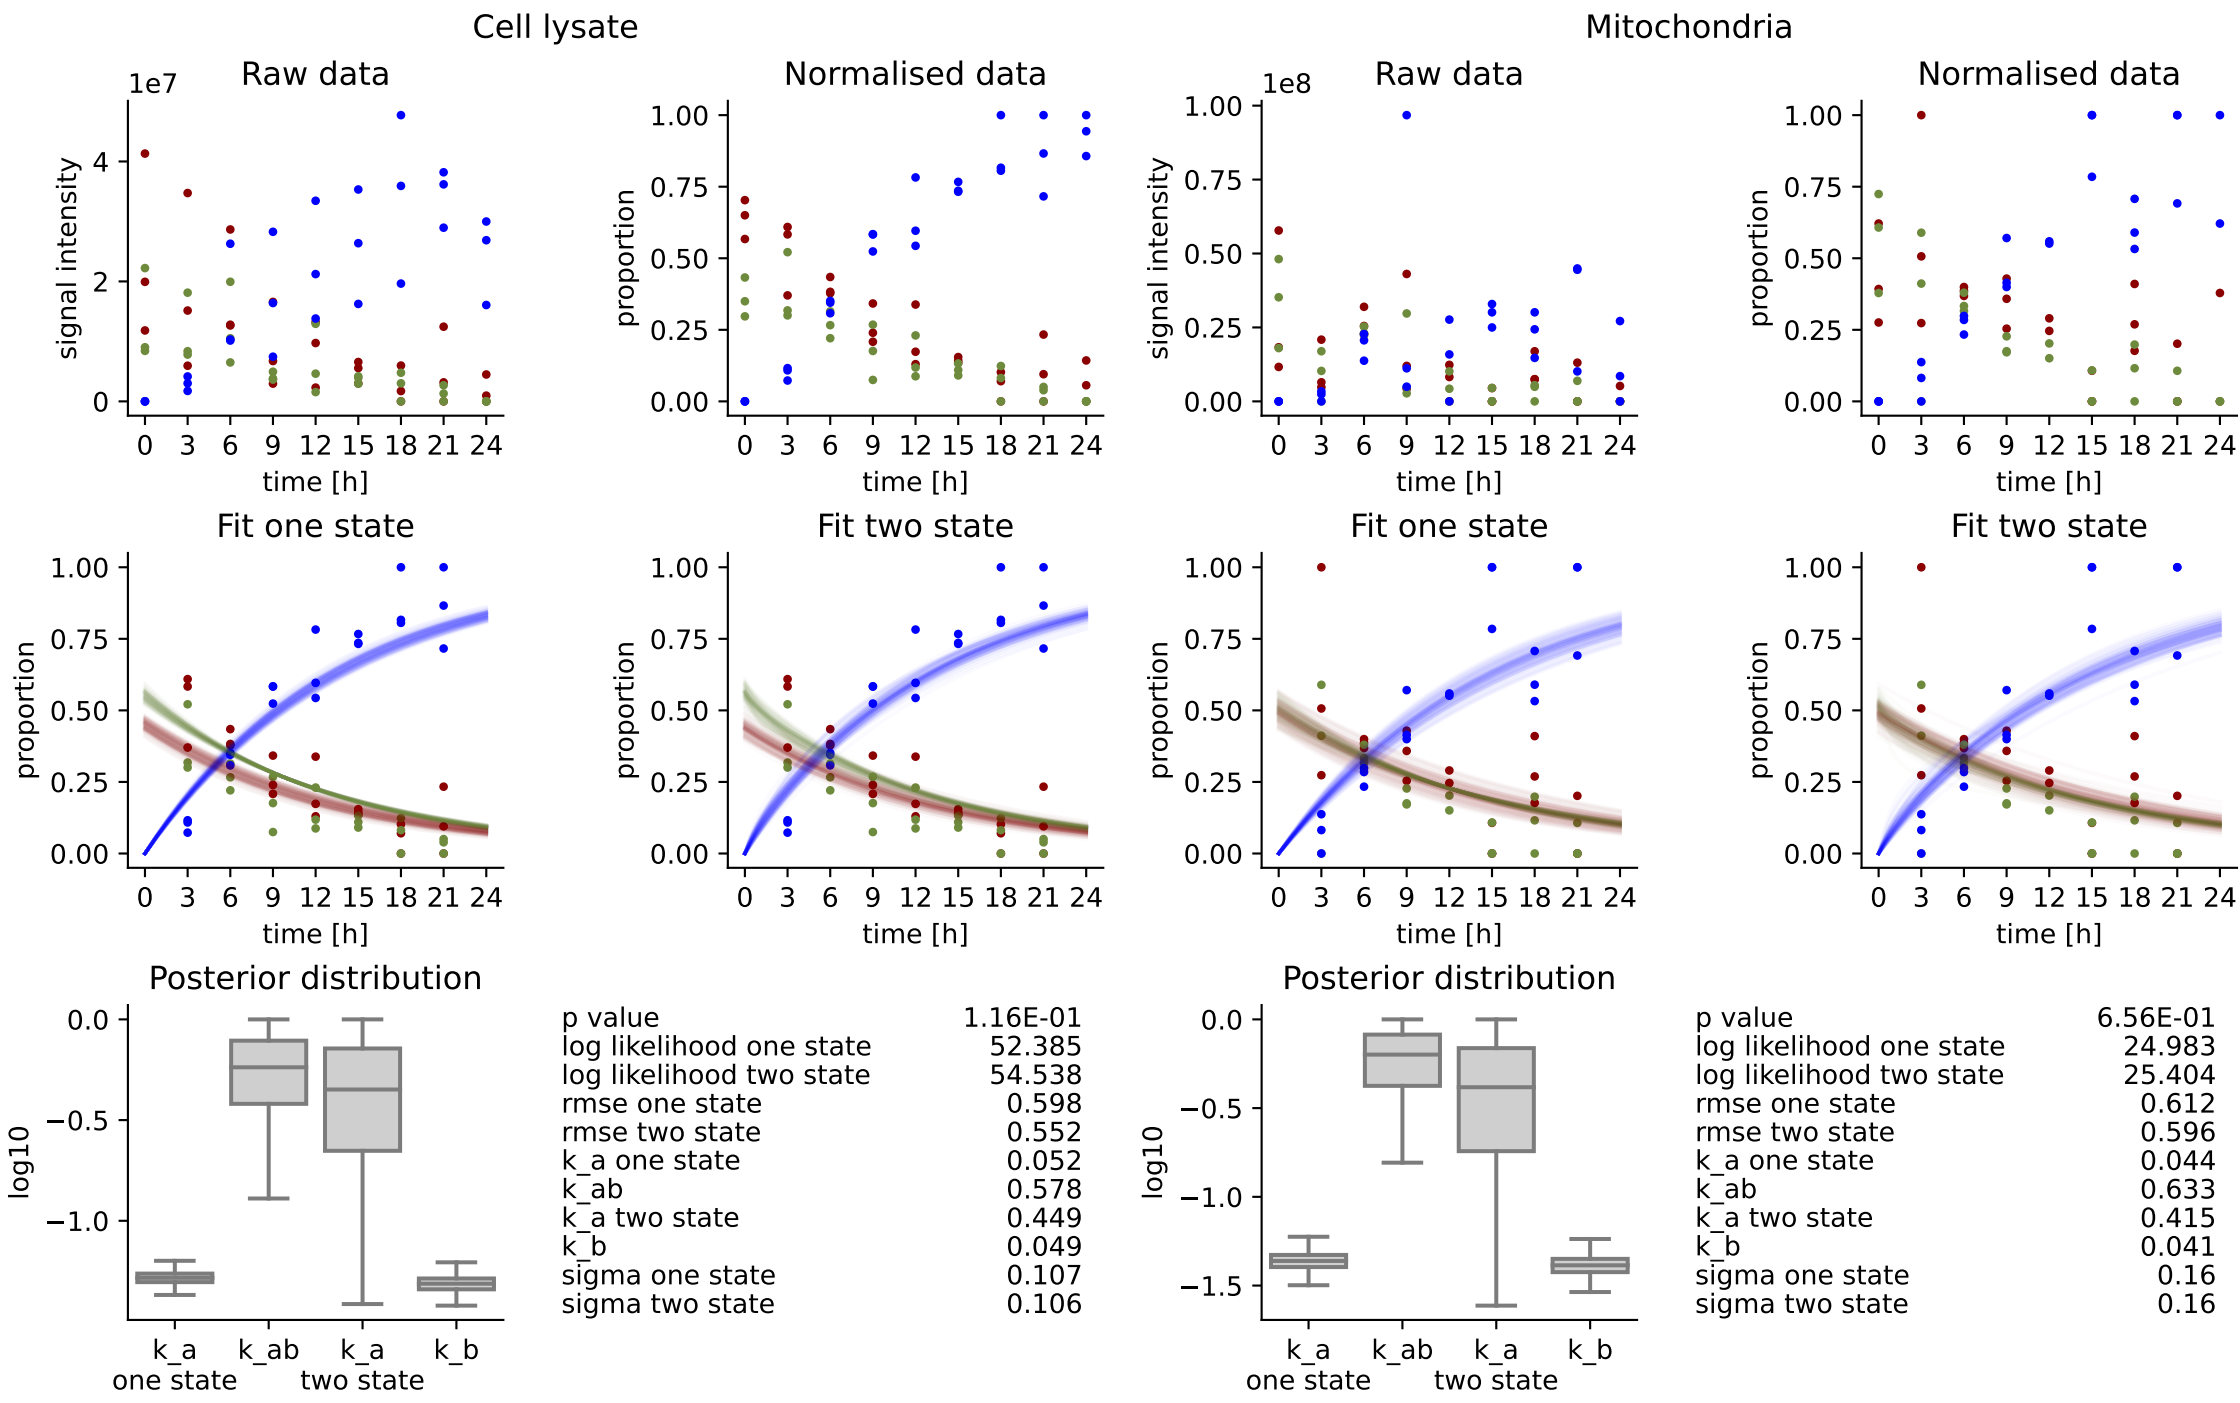



LOR8F8  
SMCR7L  
LOR8F8  
nan

### Cell lysate

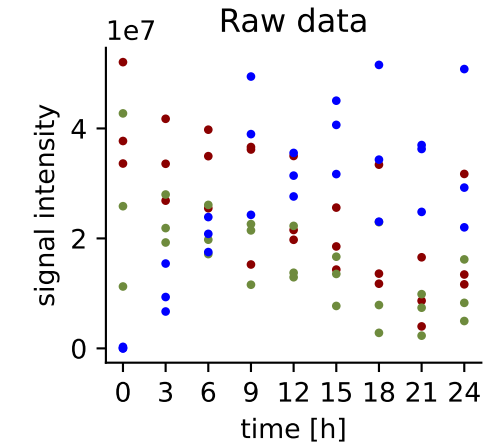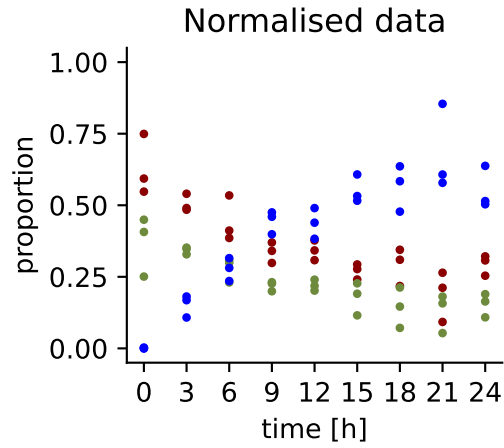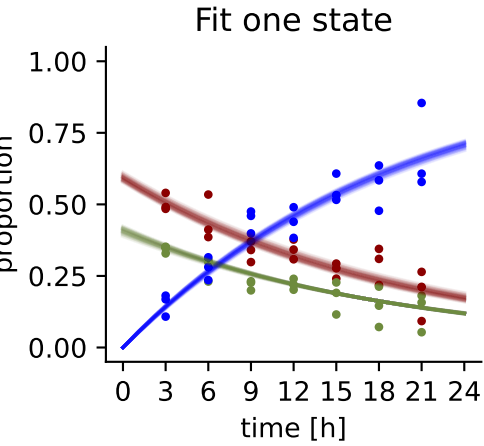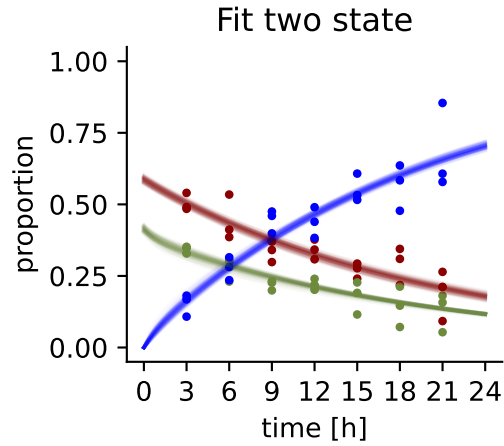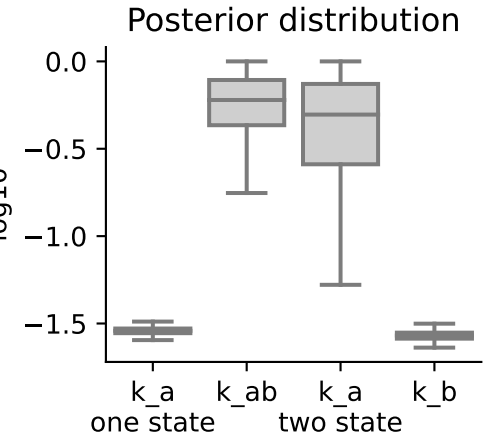

|                          |          |
|--------------------------|----------|
| p value                  | 1.57E-01 |
| log likelihood one state | 91.33    |
| log likelihood two state | 93.181   |
| rmse one state           | 0.433    |
| rmse two state           | 0.407    |
| k_a one state            | 0.029    |
| k_ab                     | 0.601    |
| k_a two state            | 0.496    |
| k_b                      | 0.027    |
| sigma one state          | 0.058    |
| sigma two state          | 0.057    |

### Mitochondria

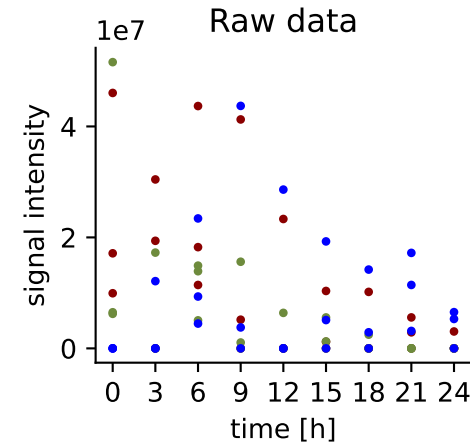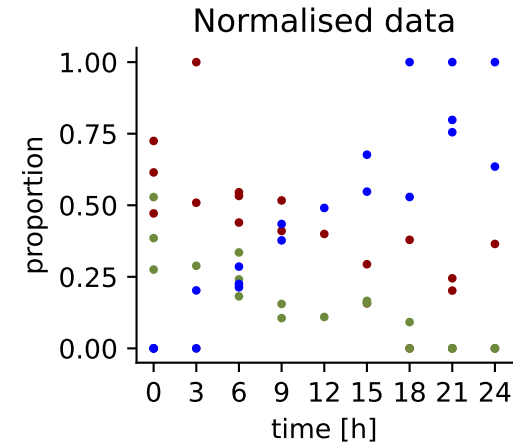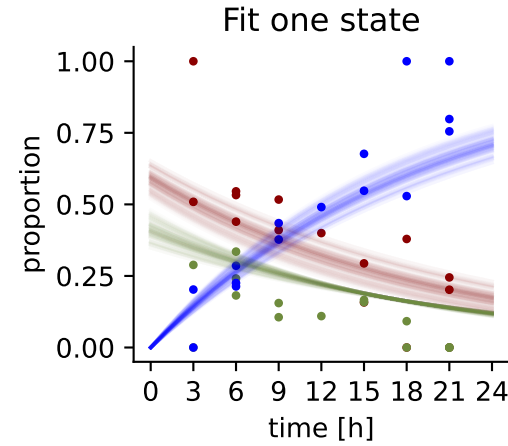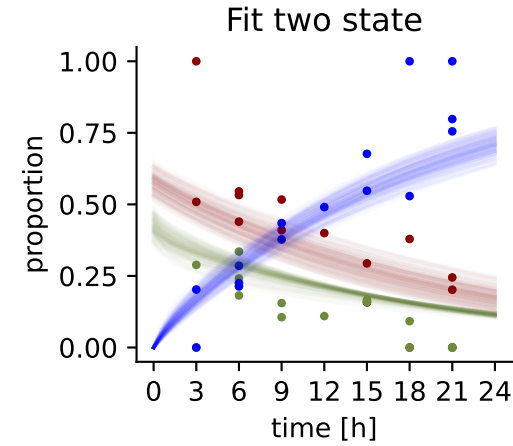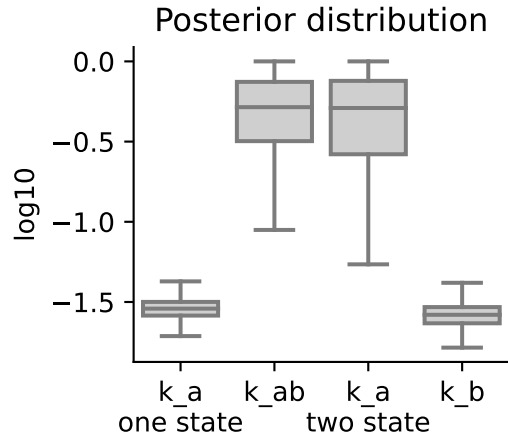

|                          |          |
|--------------------------|----------|
| p value                  | 5.41E-01 |
| log likelihood one state | 20.32    |
| log likelihood two state | 20.935   |
| rmse one state           | 0.593    |
| rmse two state           | 0.539    |
| k_a one state            | 0.029    |
| k_ab                     | 0.518    |
| k_a two state            | 0.512    |
| k_b                      | 0.026    |
| sigma one state          | 0.155    |
| sigma two state          | 0.153    |

mtACP  
 NDUFAB1  
 O14561  
 Acyl carrier protein, mitochondrial

Cell lysate

Mitochondria

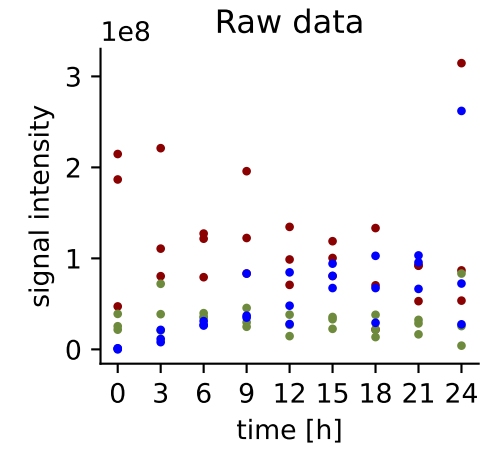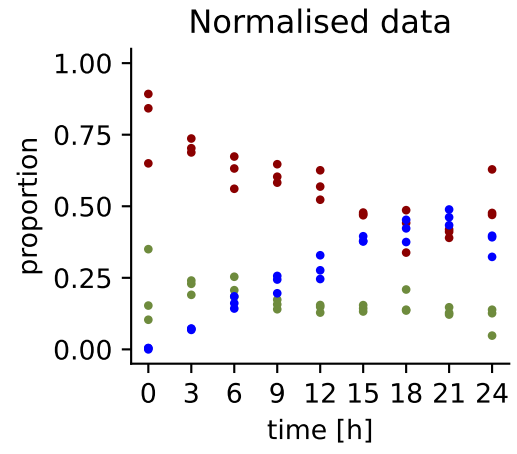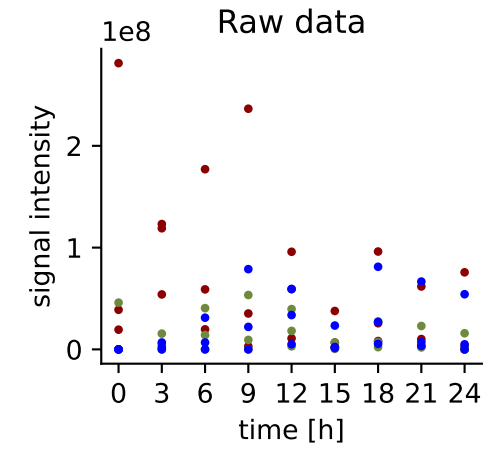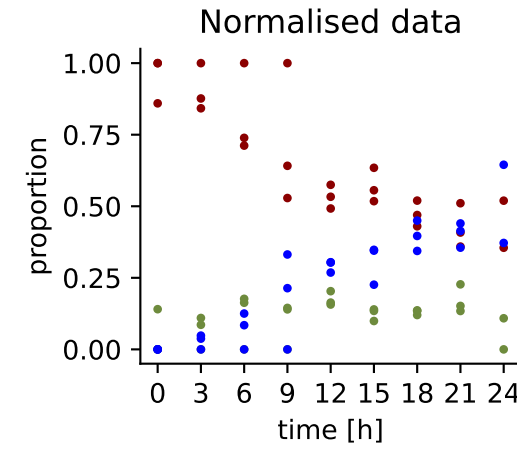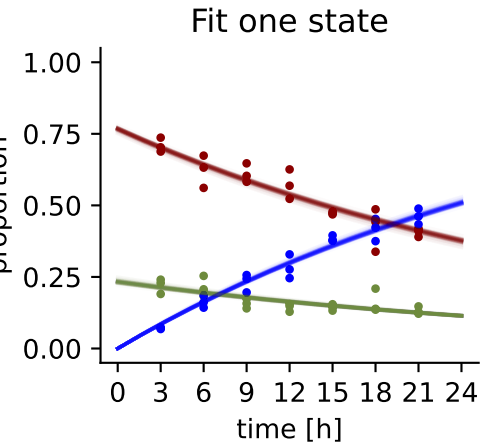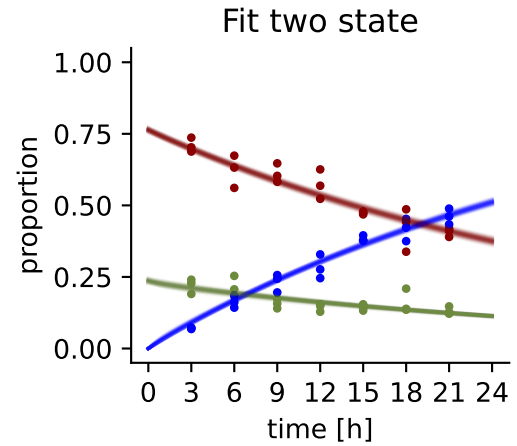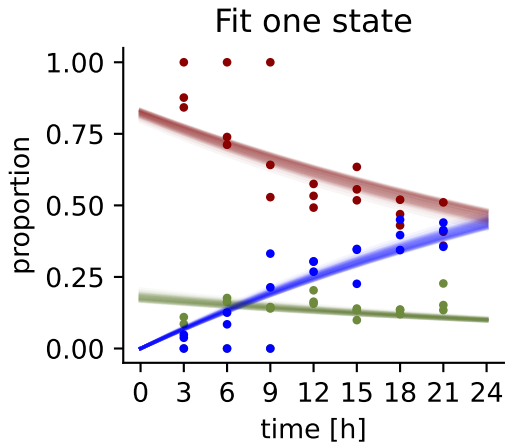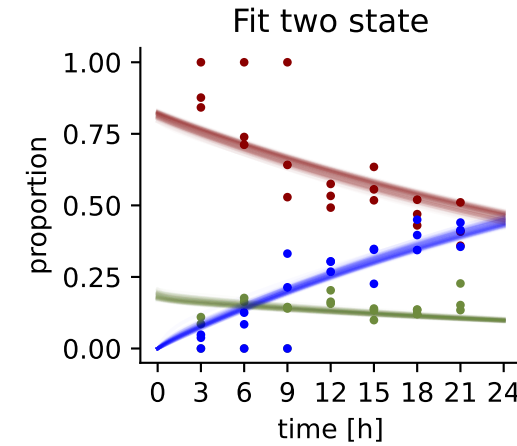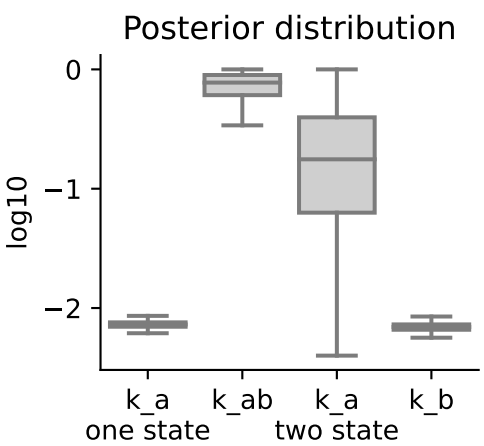

|                          |          |
|--------------------------|----------|
| p value                  | 8.91E-01 |
| log likelihood one state | 126.463  |
| log likelihood two state | 126.578  |
| rmse one state           | 0.314    |
| rmse two state           | 0.317    |
| k_a one state            | 0.007    |
| k_ab                     | 0.775    |
| k_a two state            | 0.176    |
| k_b                      | 0.007    |
| sigma one state          | 0.033    |
| sigma two state          | 0.034    |

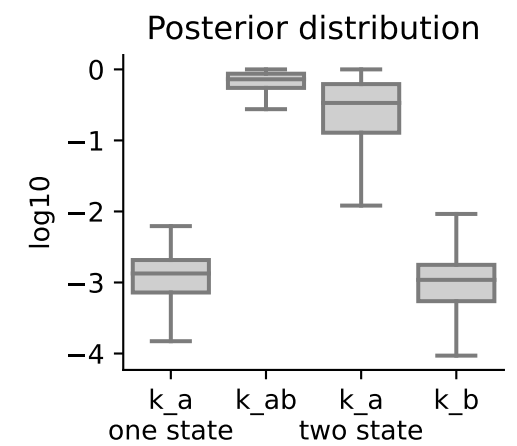

|                          |          |
|--------------------------|----------|
| p value                  | 9.80E-01 |
| log likelihood one state | 57.982   |
| log likelihood two state | 58.001   |
| rmse one state           | 0.338    |
| rmse two state           | 0.338    |
| k_a one state            | 0.001    |
| k_ab                     | 0.726    |
| k_a two state            | 0.337    |
| k_b                      | 0.001    |
| sigma one state          | 0.097    |
| sigma two state          | 0.098    |

GTPBP5  
MTG2  
Q9H4K7

Mitochondrial ribosome-associated GTPase 2

Cell lysate

Mitochondria

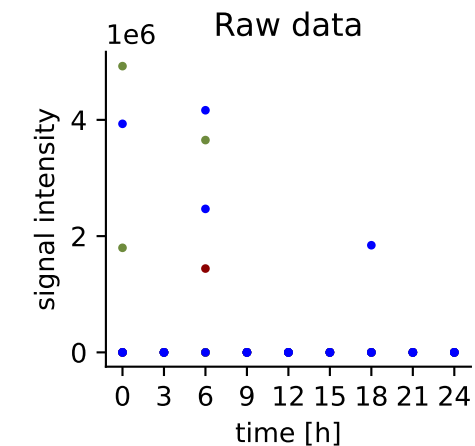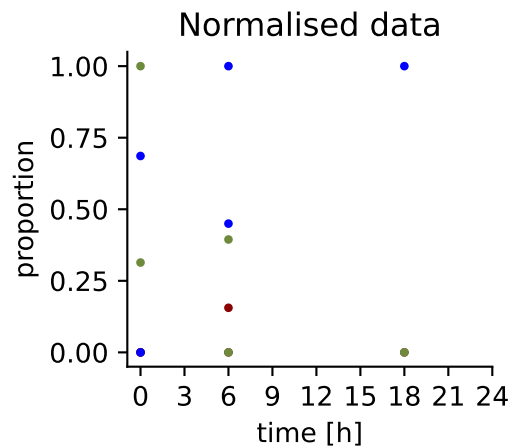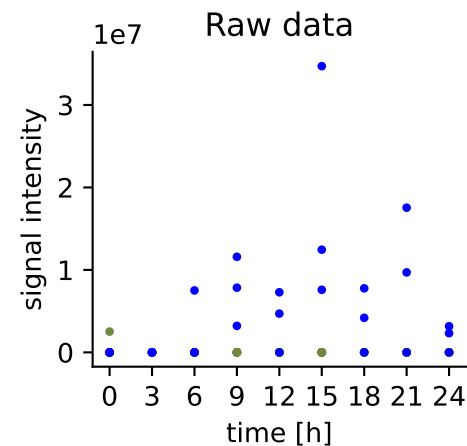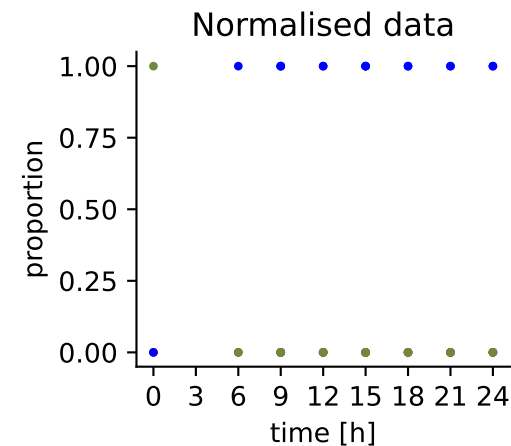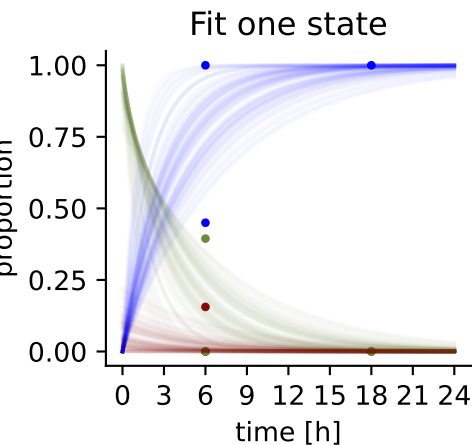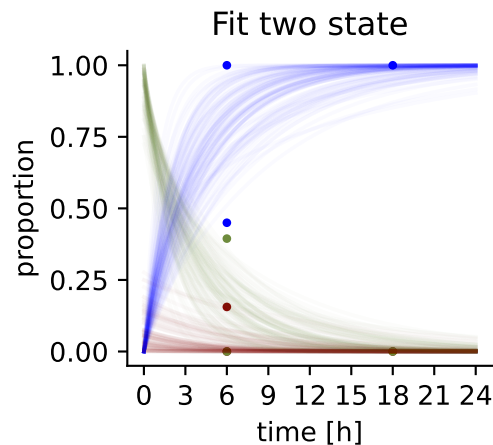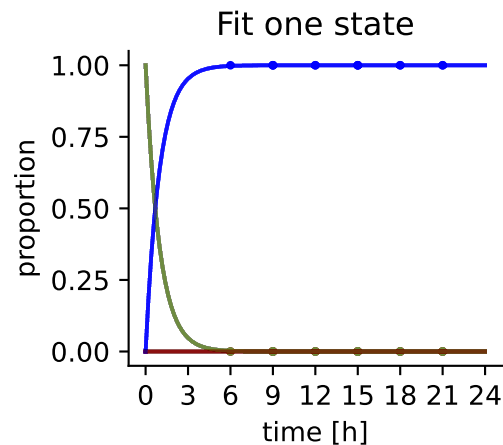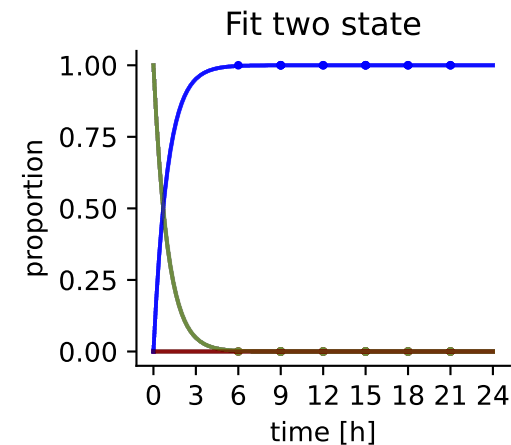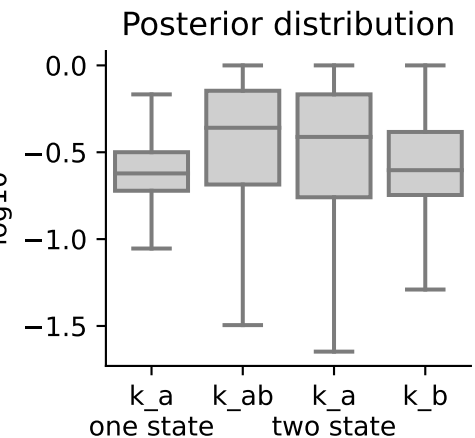

|                          |          |
|--------------------------|----------|
| p value                  | 9.03E-01 |
| log likelihood one state | 3.305    |
| log likelihood two state | 3.406    |
| rmse one state           | 0.569    |
| rmse two state           | 0.449    |
| k_a one state            | 0.239    |
| k_ab                     | 0.437    |
| k_a two state            | 0.387    |
| k_b                      | 0.249    |
| sigma one state          | 0.168    |
| sigma two state          | 0.167    |

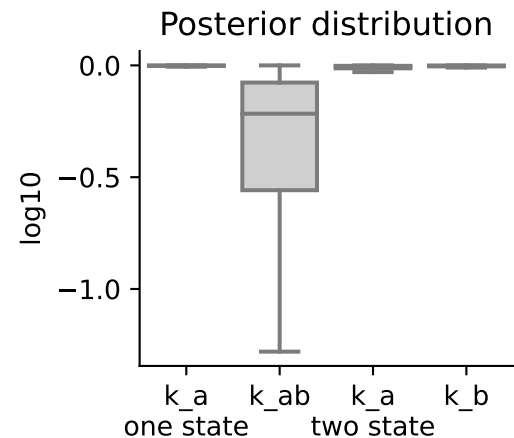

|                          |          |
|--------------------------|----------|
| p value                  | 1.00E+00 |
| log likelihood one state | 241.723  |
| log likelihood two state | 241.699  |
| rmse one state           | 0.066    |
| rmse two state           | 0.066    |
| k_a one state            | 0.997    |
| k_ab                     | 0.608    |
| k_a two state            | 0.987    |
| k_b                      | 0.995    |
| sigma one state          | 0.001    |
| sigma two state          | 0.001    |

GTPBP7  
MTG1  
Q9BT17  
Mitochondrial ribosome-associated GTPase 1

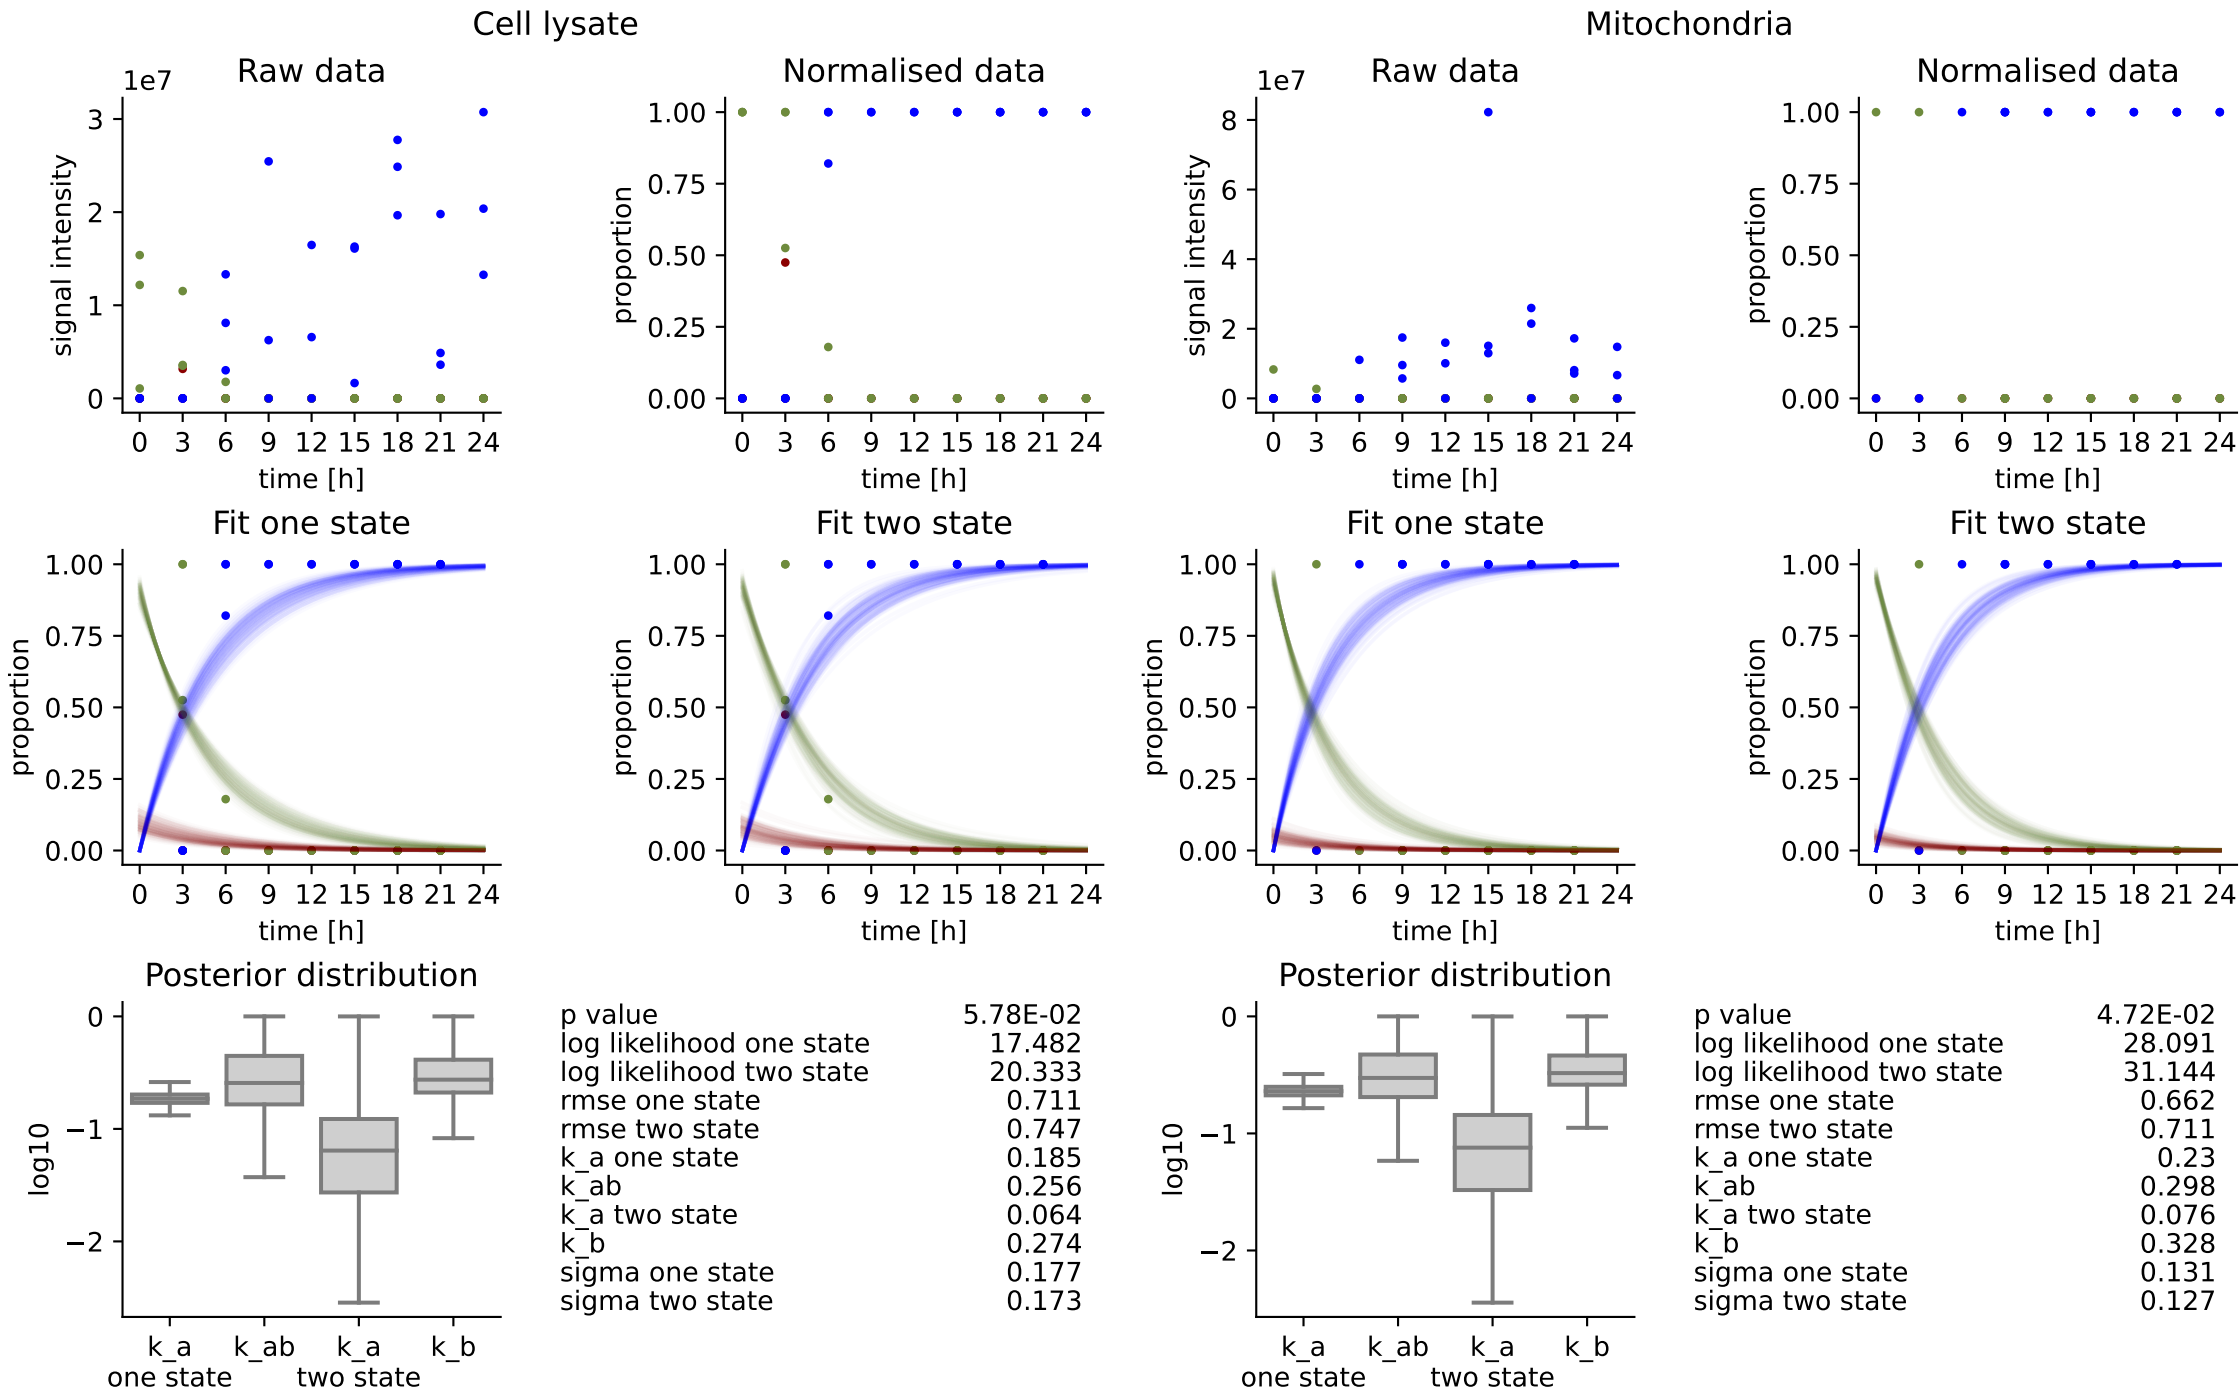

GTPBP10  
GTPBP10  
A4D1E9  
GTP-binding protein 10

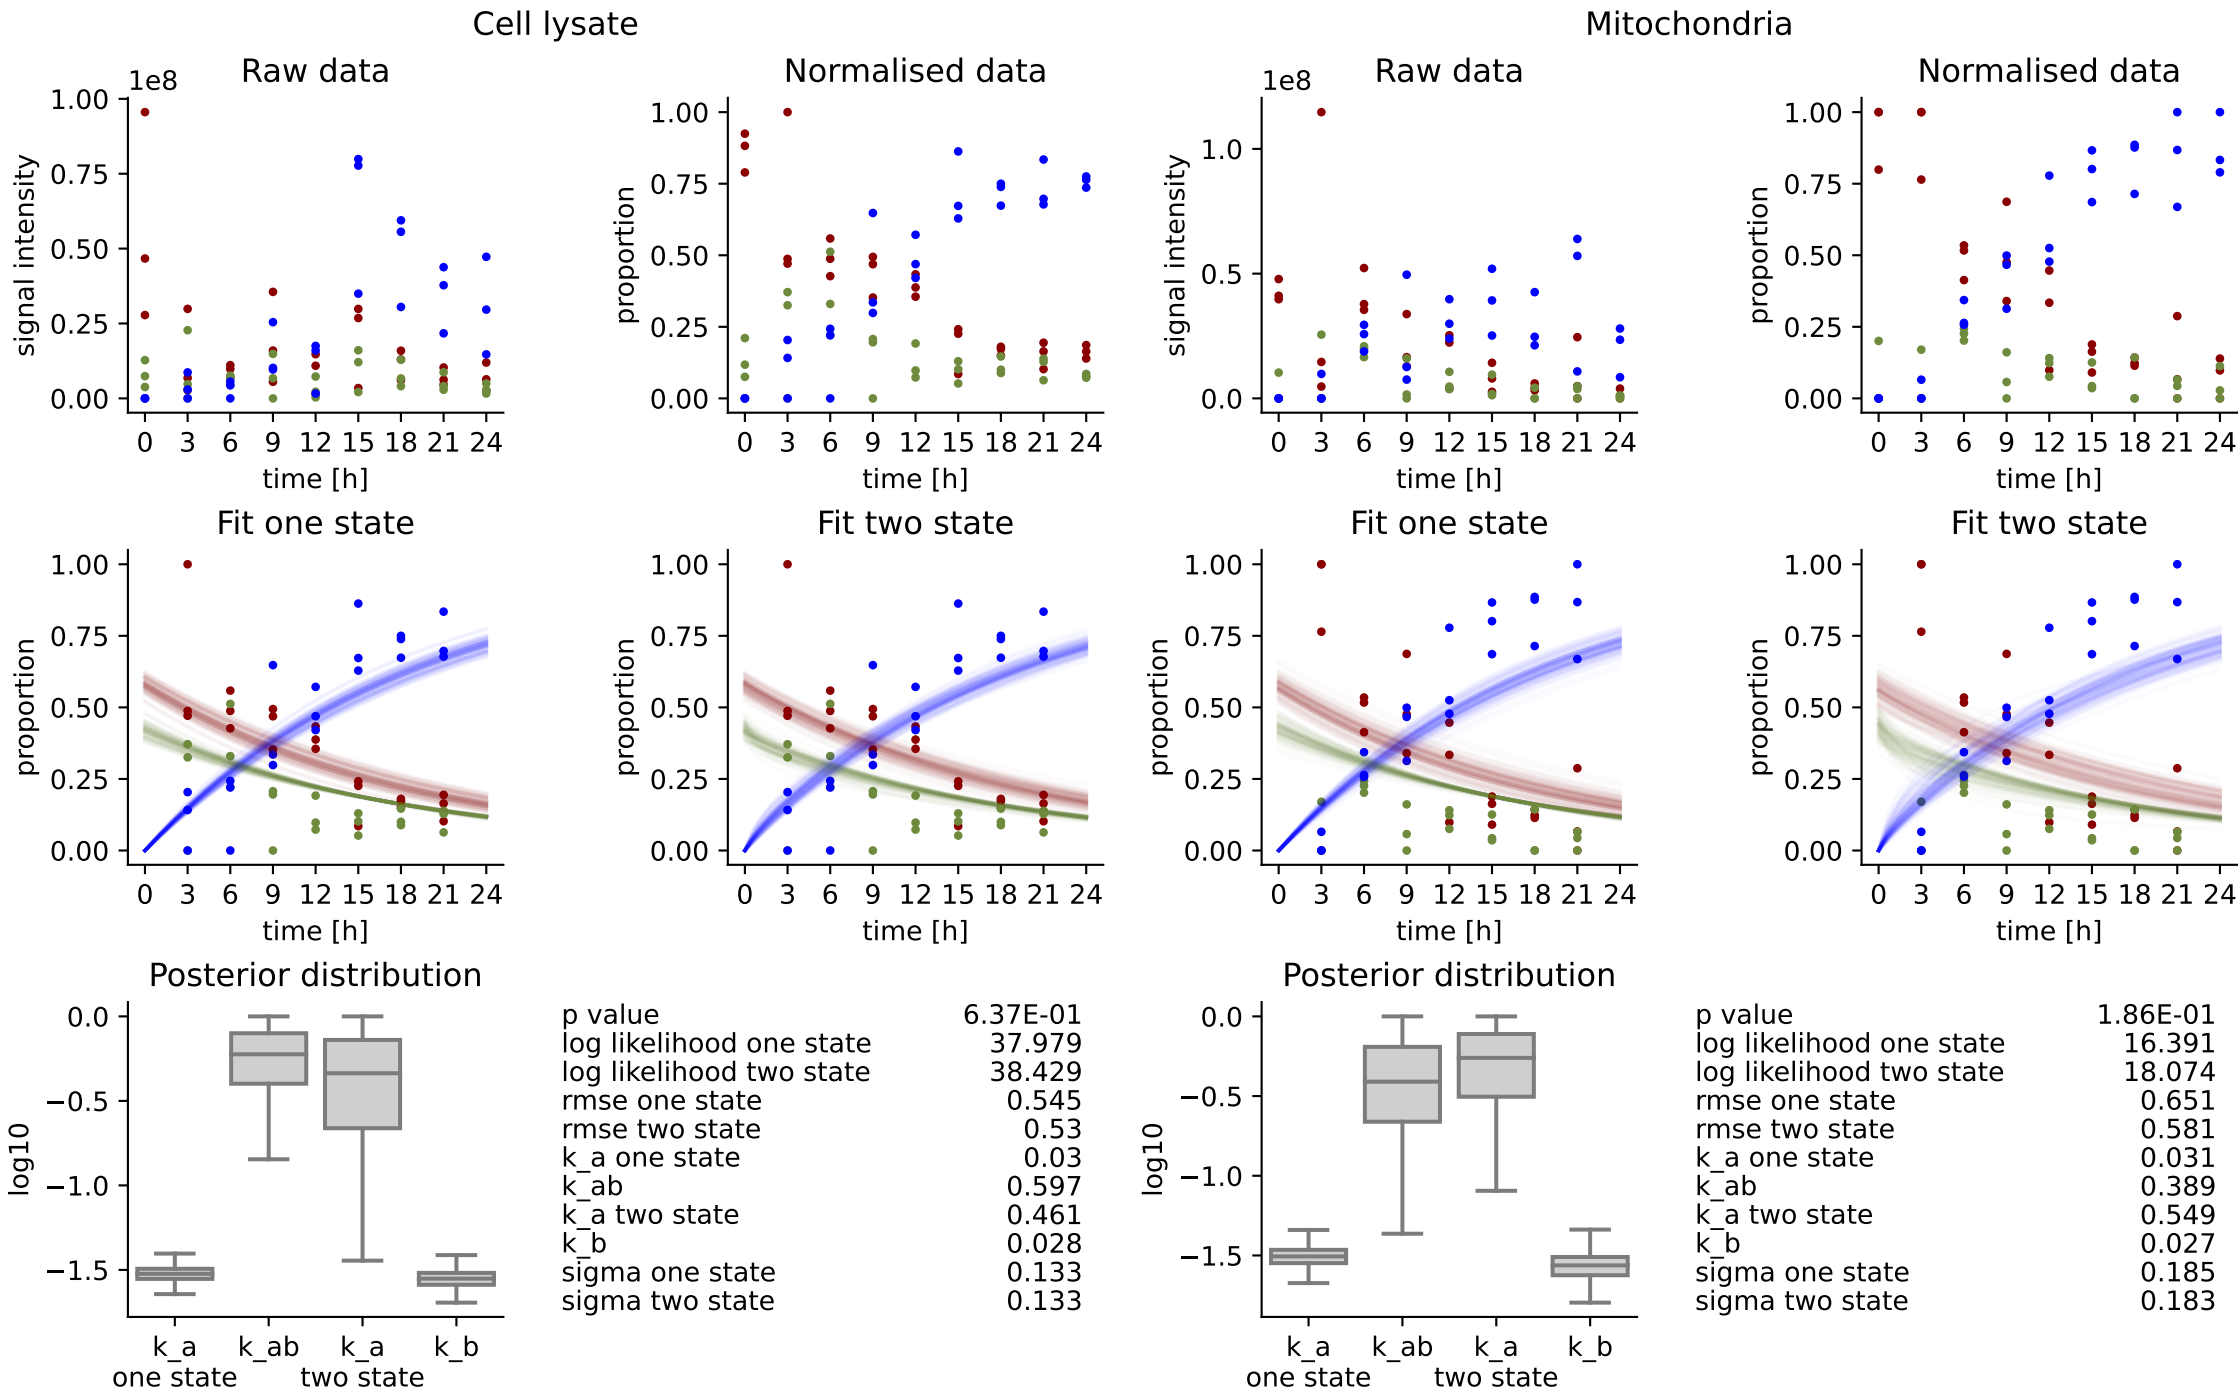

MTERF4  
MTERF4  
Q7Z6M4

Transcription termination factor 4, mitochondrial;mTERF domain-containing protein 2 processed

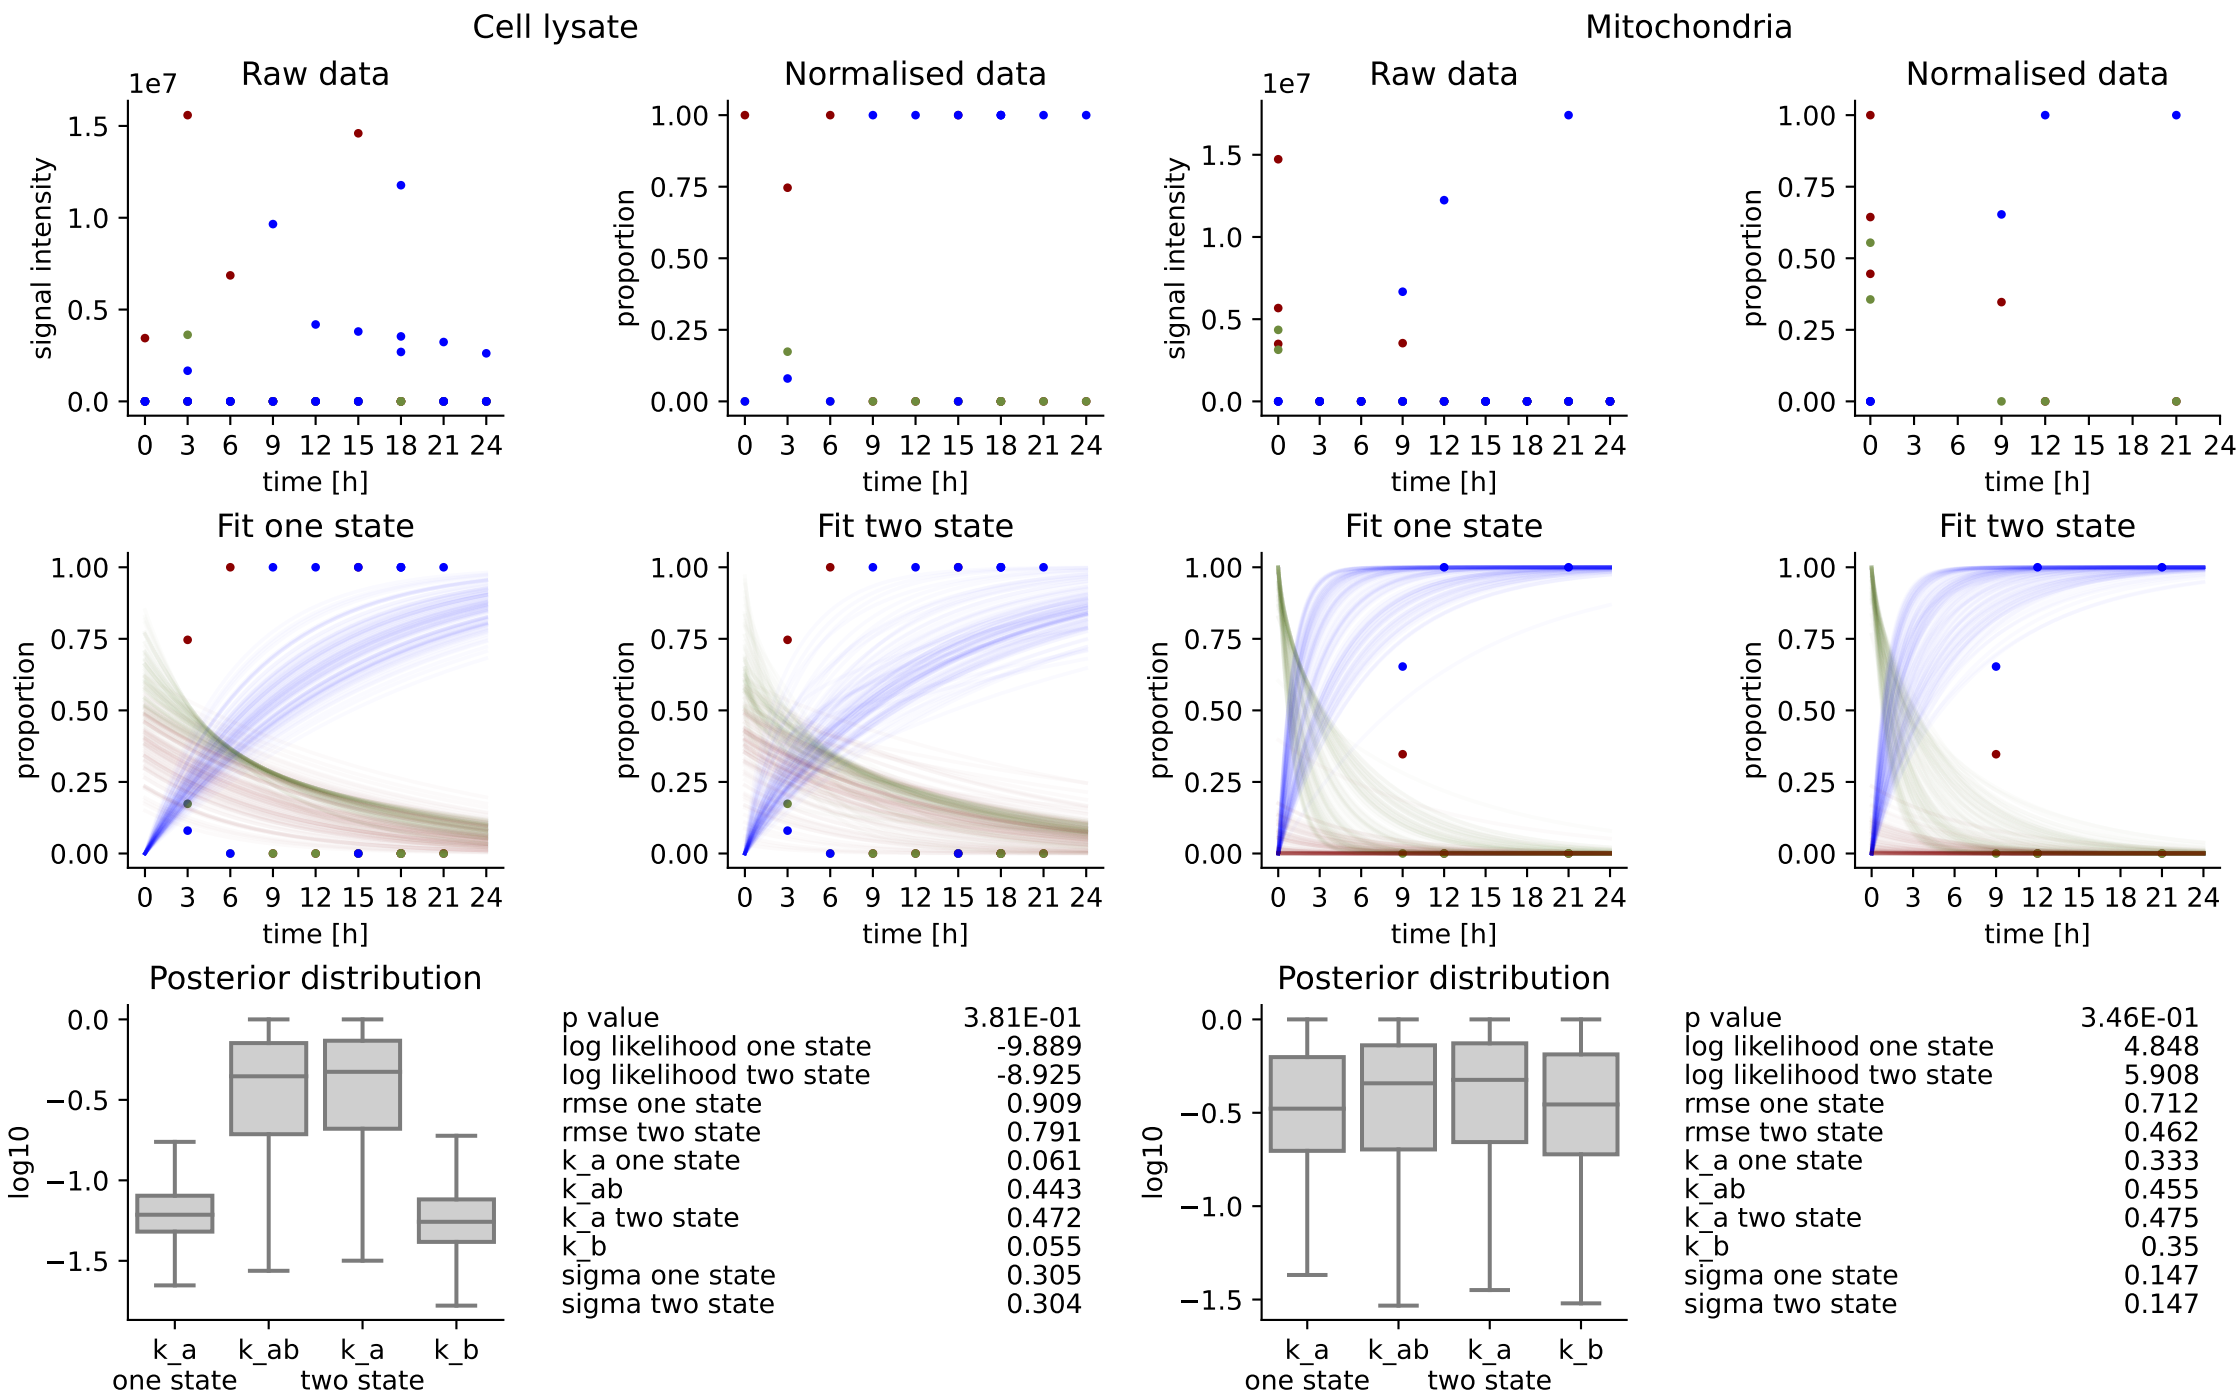

DDX28  
DDX28  
Q9NUL7

Probable ATP-dependent RNA helicase DDX28

Cell lysate

Mitochondria

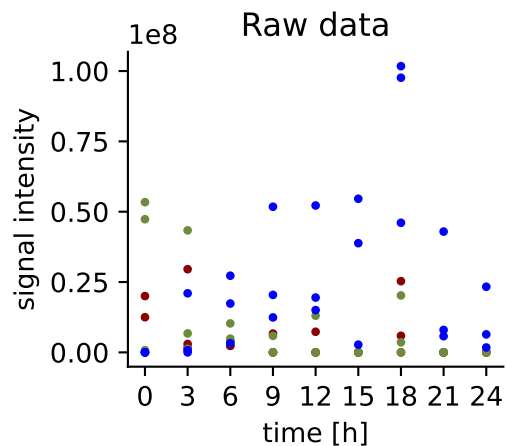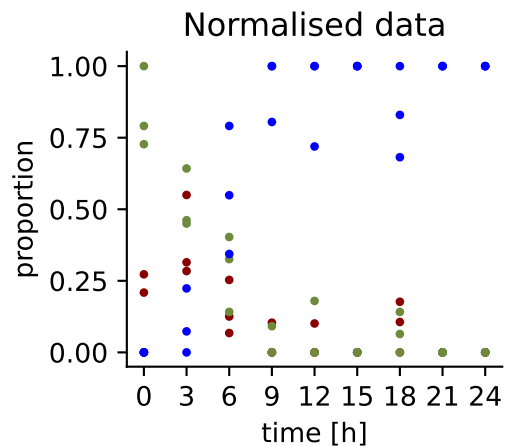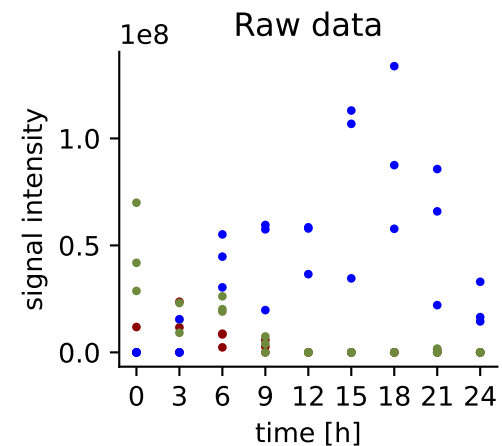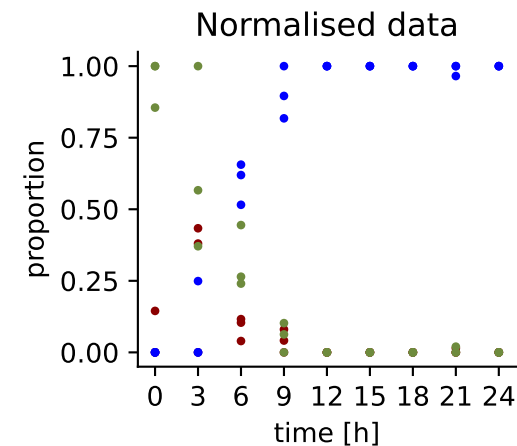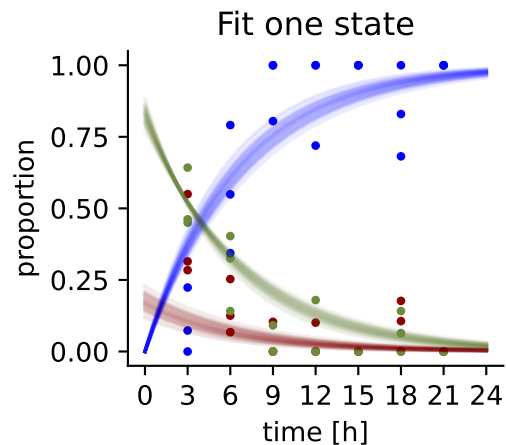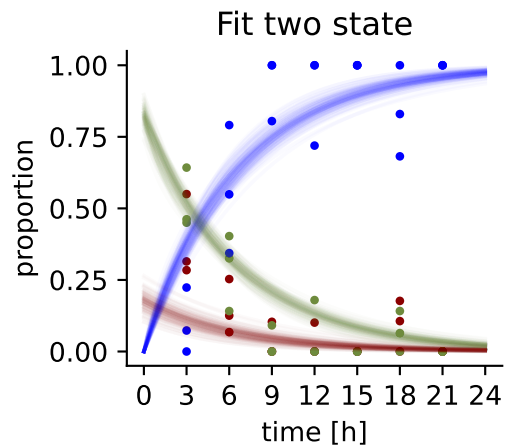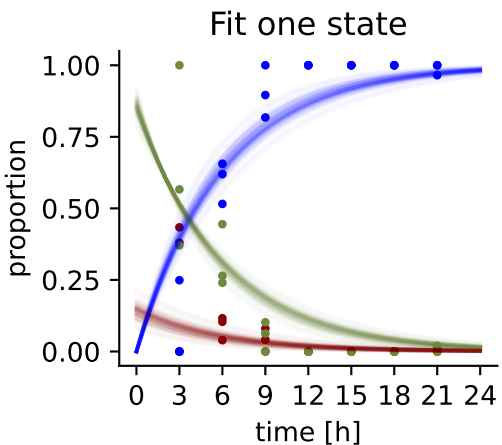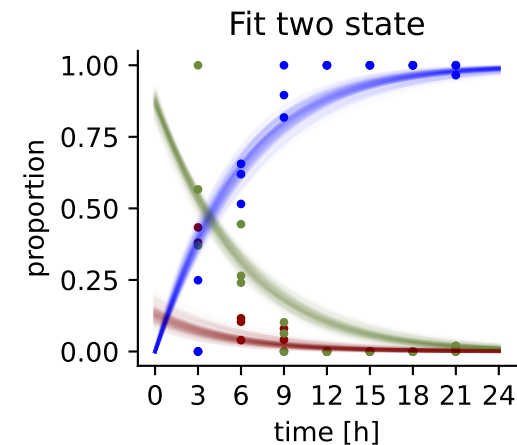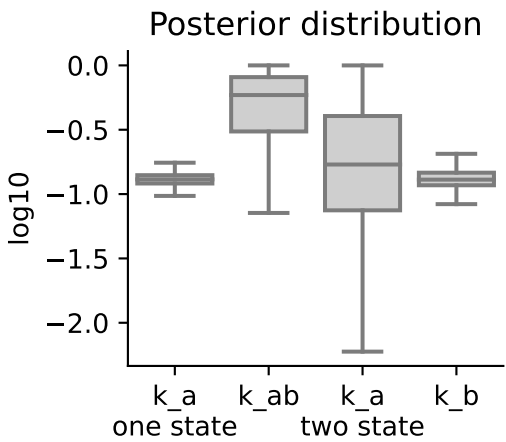

|                          |          |
|--------------------------|----------|
| p value                  | 7.22E-01 |
| log likelihood one state | 34.094   |
| log likelihood two state | 34.419   |
| rmse one state           | 0.685    |
| rmse two state           | 0.708    |
| $k_a$ one state          | 0.13     |
| $k_{ab}$                 | 0.588    |
| $k_a$ two state          | 0.17     |
| $k_b$                    | 0.13     |
| sigma one state          | 0.142    |
| sigma two state          | 0.143    |

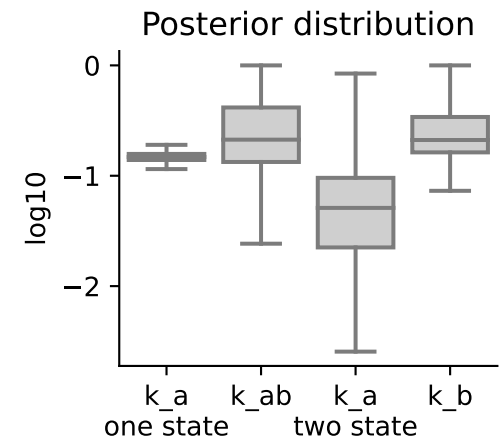

|                          |          |
|--------------------------|----------|
| p value                  | 4.78E-02 |
| log likelihood one state | 37.535   |
| log likelihood two state | 40.576   |
| rmse one state           | 0.694    |
| rmse two state           | 0.736    |
| $k_a$ one state          | 0.148    |
| $k_{ab}$                 | 0.212    |
| $k_a$ two state          | 0.051    |
| $k_b$                    | 0.211    |
| sigma one state          | 0.134    |
| sigma two state          | 0.131    |



MTERF3  
MTERF3  
Q96E29  
Transcription termination factor 3, mitochondrial

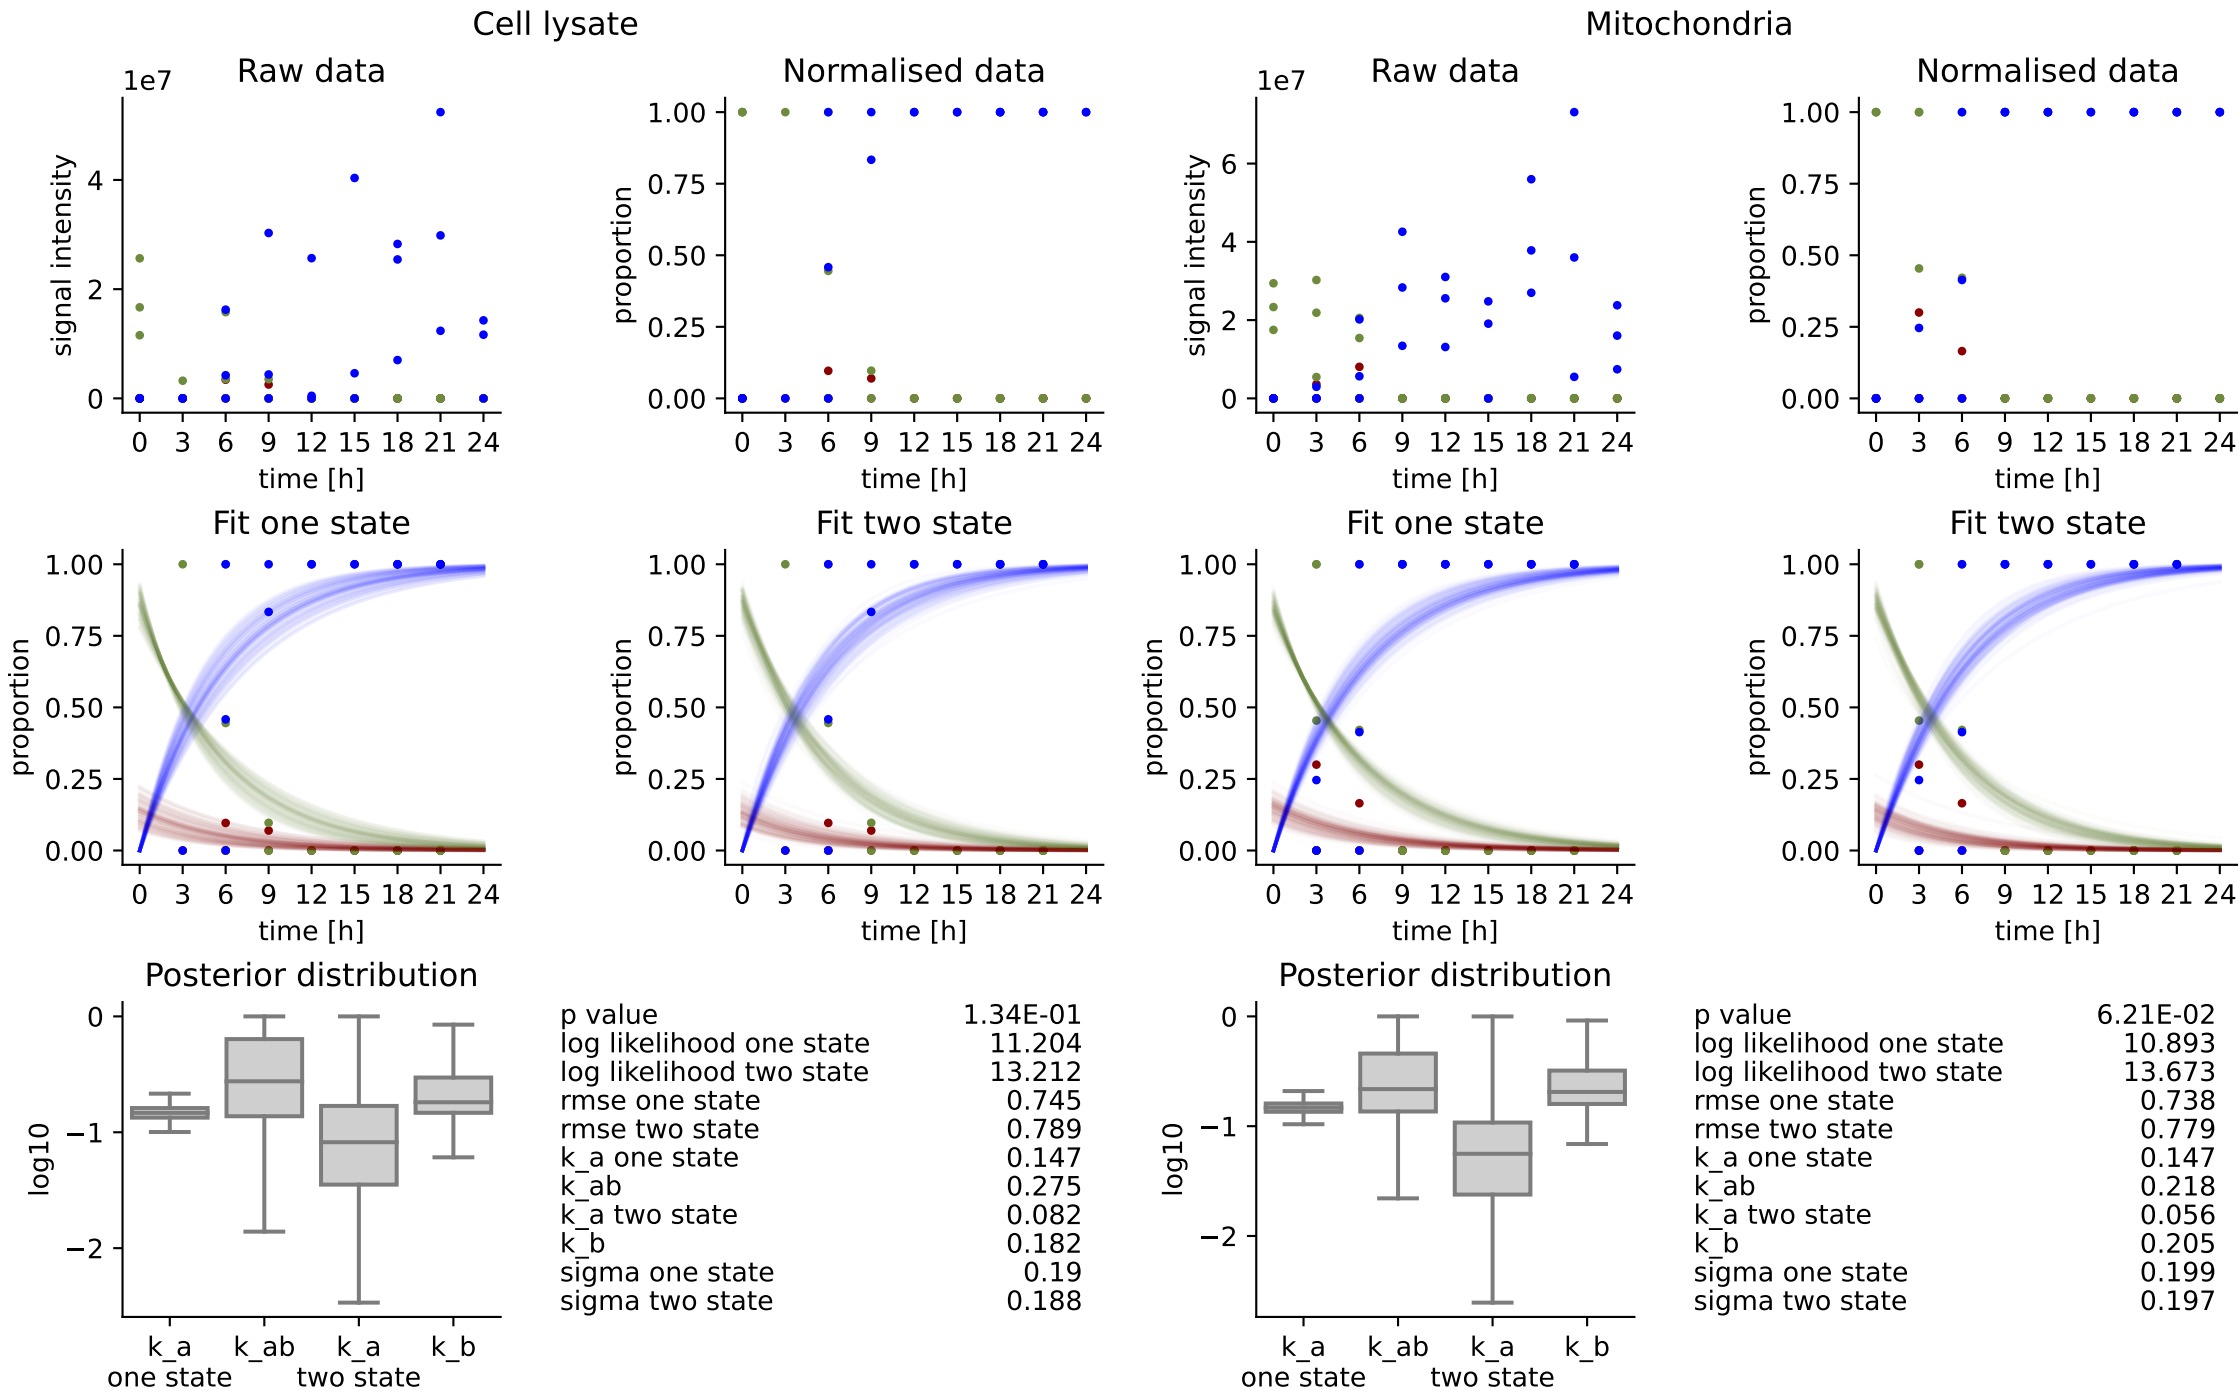

FASTKD2  
FASTKD2  
Q9NYY8  
FAST kinase domain-containing protein 2

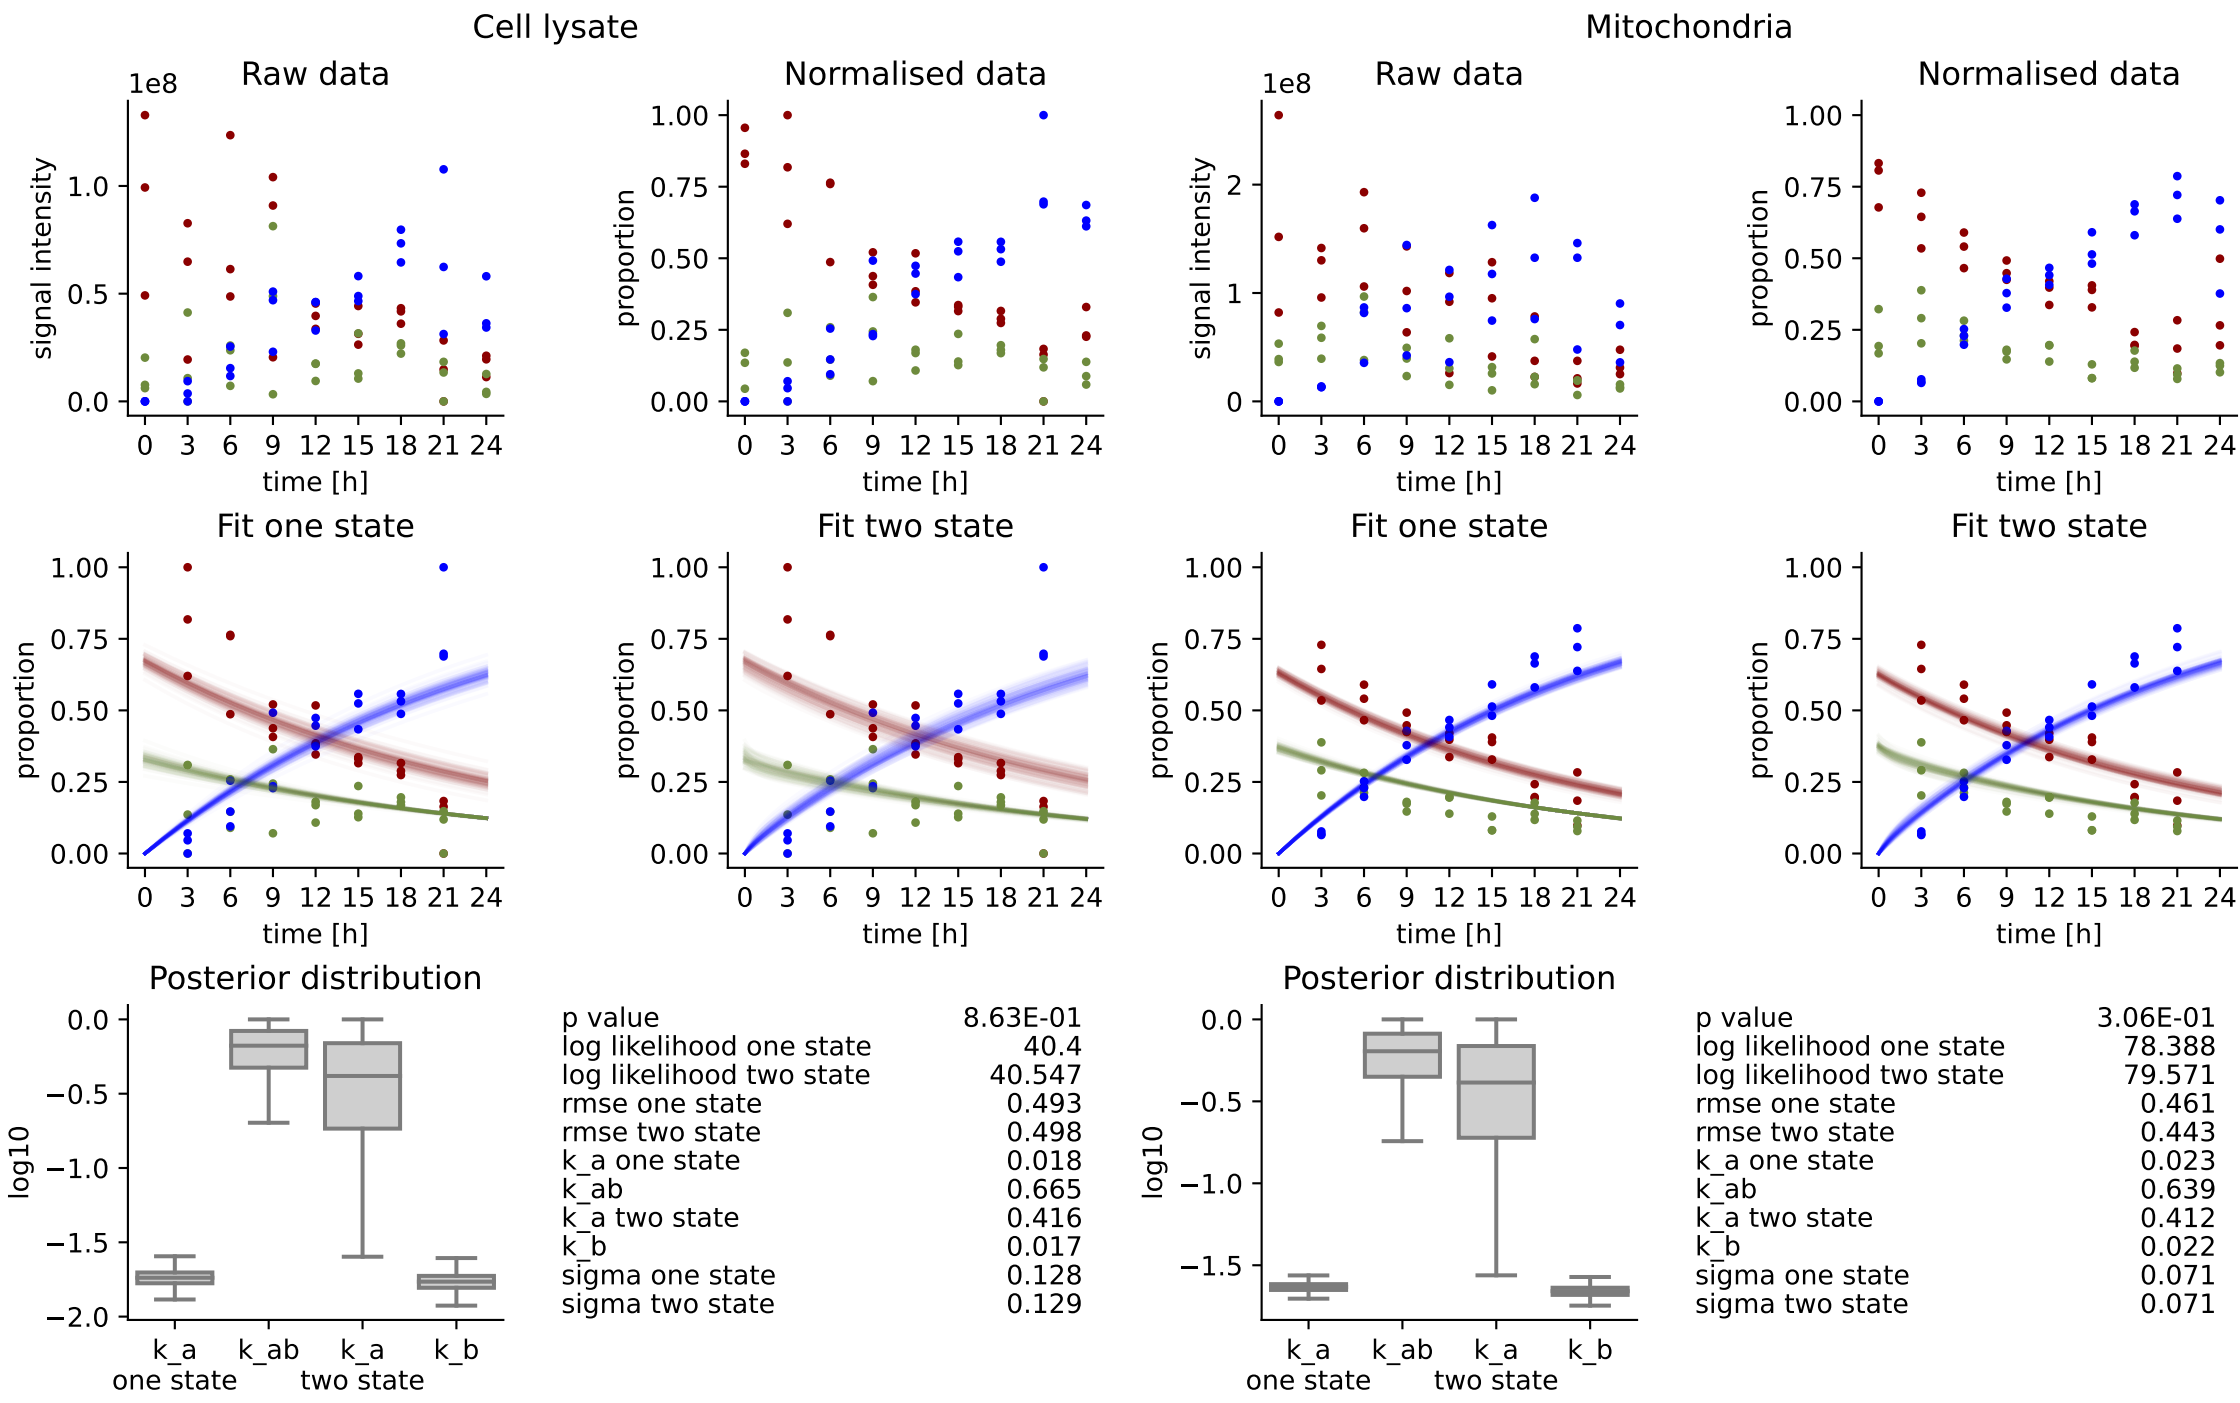

RPUSD3  
 RPU3D3  
 Q6P087

RNA pseudouridylate synthase domain-containing protein 3

Cell lysate

Mitochondria

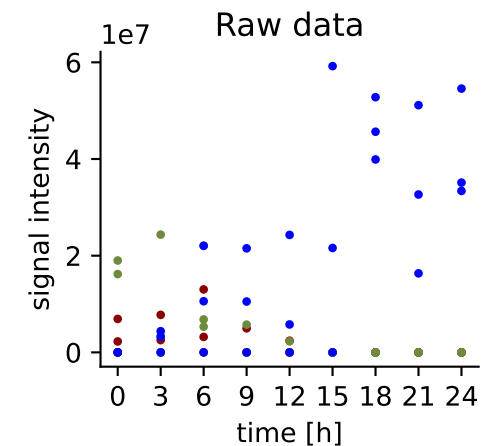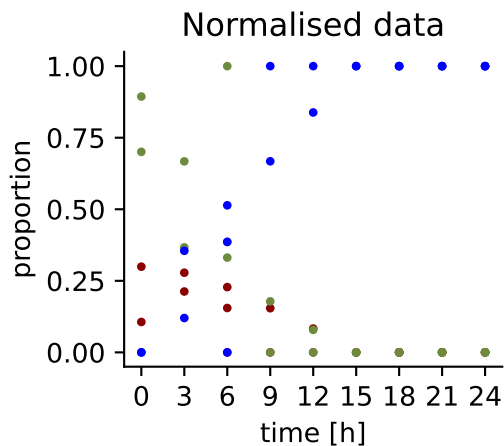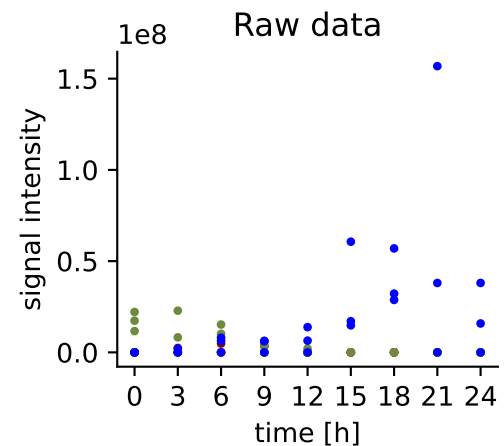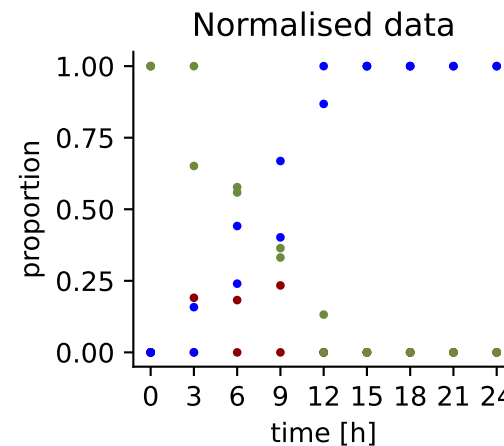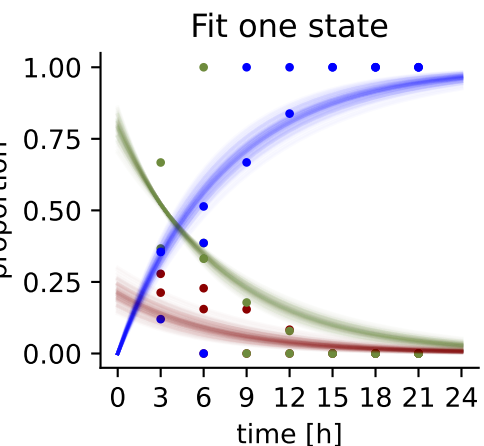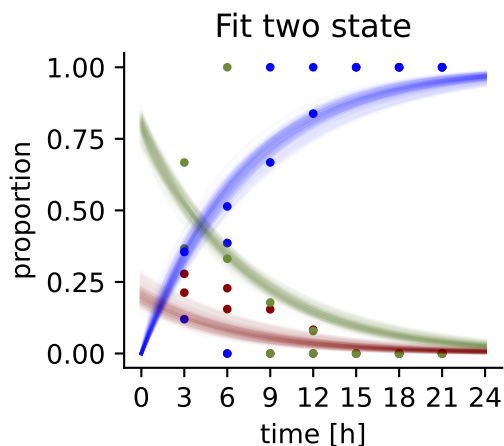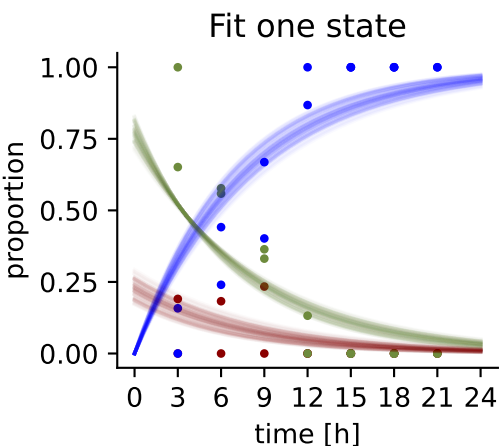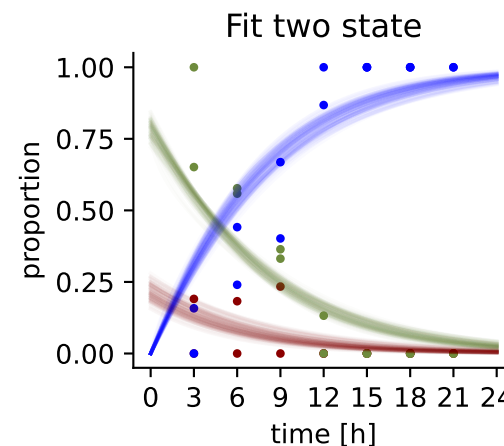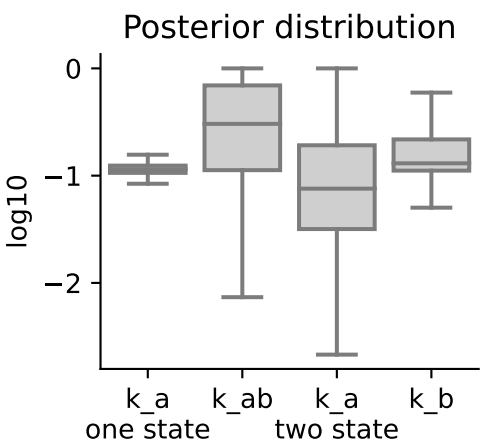

|                          |          |
|--------------------------|----------|
| p value                  | 1.62E-01 |
| log likelihood one state | 22.118   |
| log likelihood two state | 23.94    |
| rmse one state           | 0.712    |
| rmse two state           | 0.759    |
| k_a one state            | 0.115    |
| k_ab                     | 0.304    |
| k_a two state            | 0.076    |
| k_b                      | 0.13     |
| sigma one state          | 0.157    |
| sigma two state          | 0.157    |

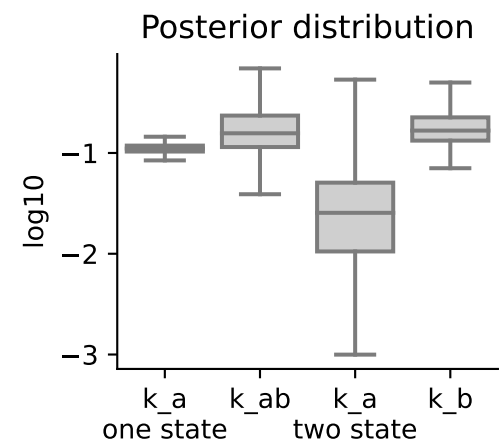

|                          |          |
|--------------------------|----------|
| p value                  | 7.55E-03 |
| log likelihood one state | 24.95    |
| log likelihood two state | 29.837   |
| rmse one state           | 0.701    |
| rmse two state           | 0.741    |
| k_a one state            | 0.111    |
| k_ab                     | 0.157    |
| k_a two state            | 0.025    |
| k_b                      | 0.167    |
| sigma one state          | 0.145    |
| sigma two state          | 0.137    |

PTCD1  
PTCD1  
O75127

Pentatricopeptide repeat-containing protein 1, mitochondrial

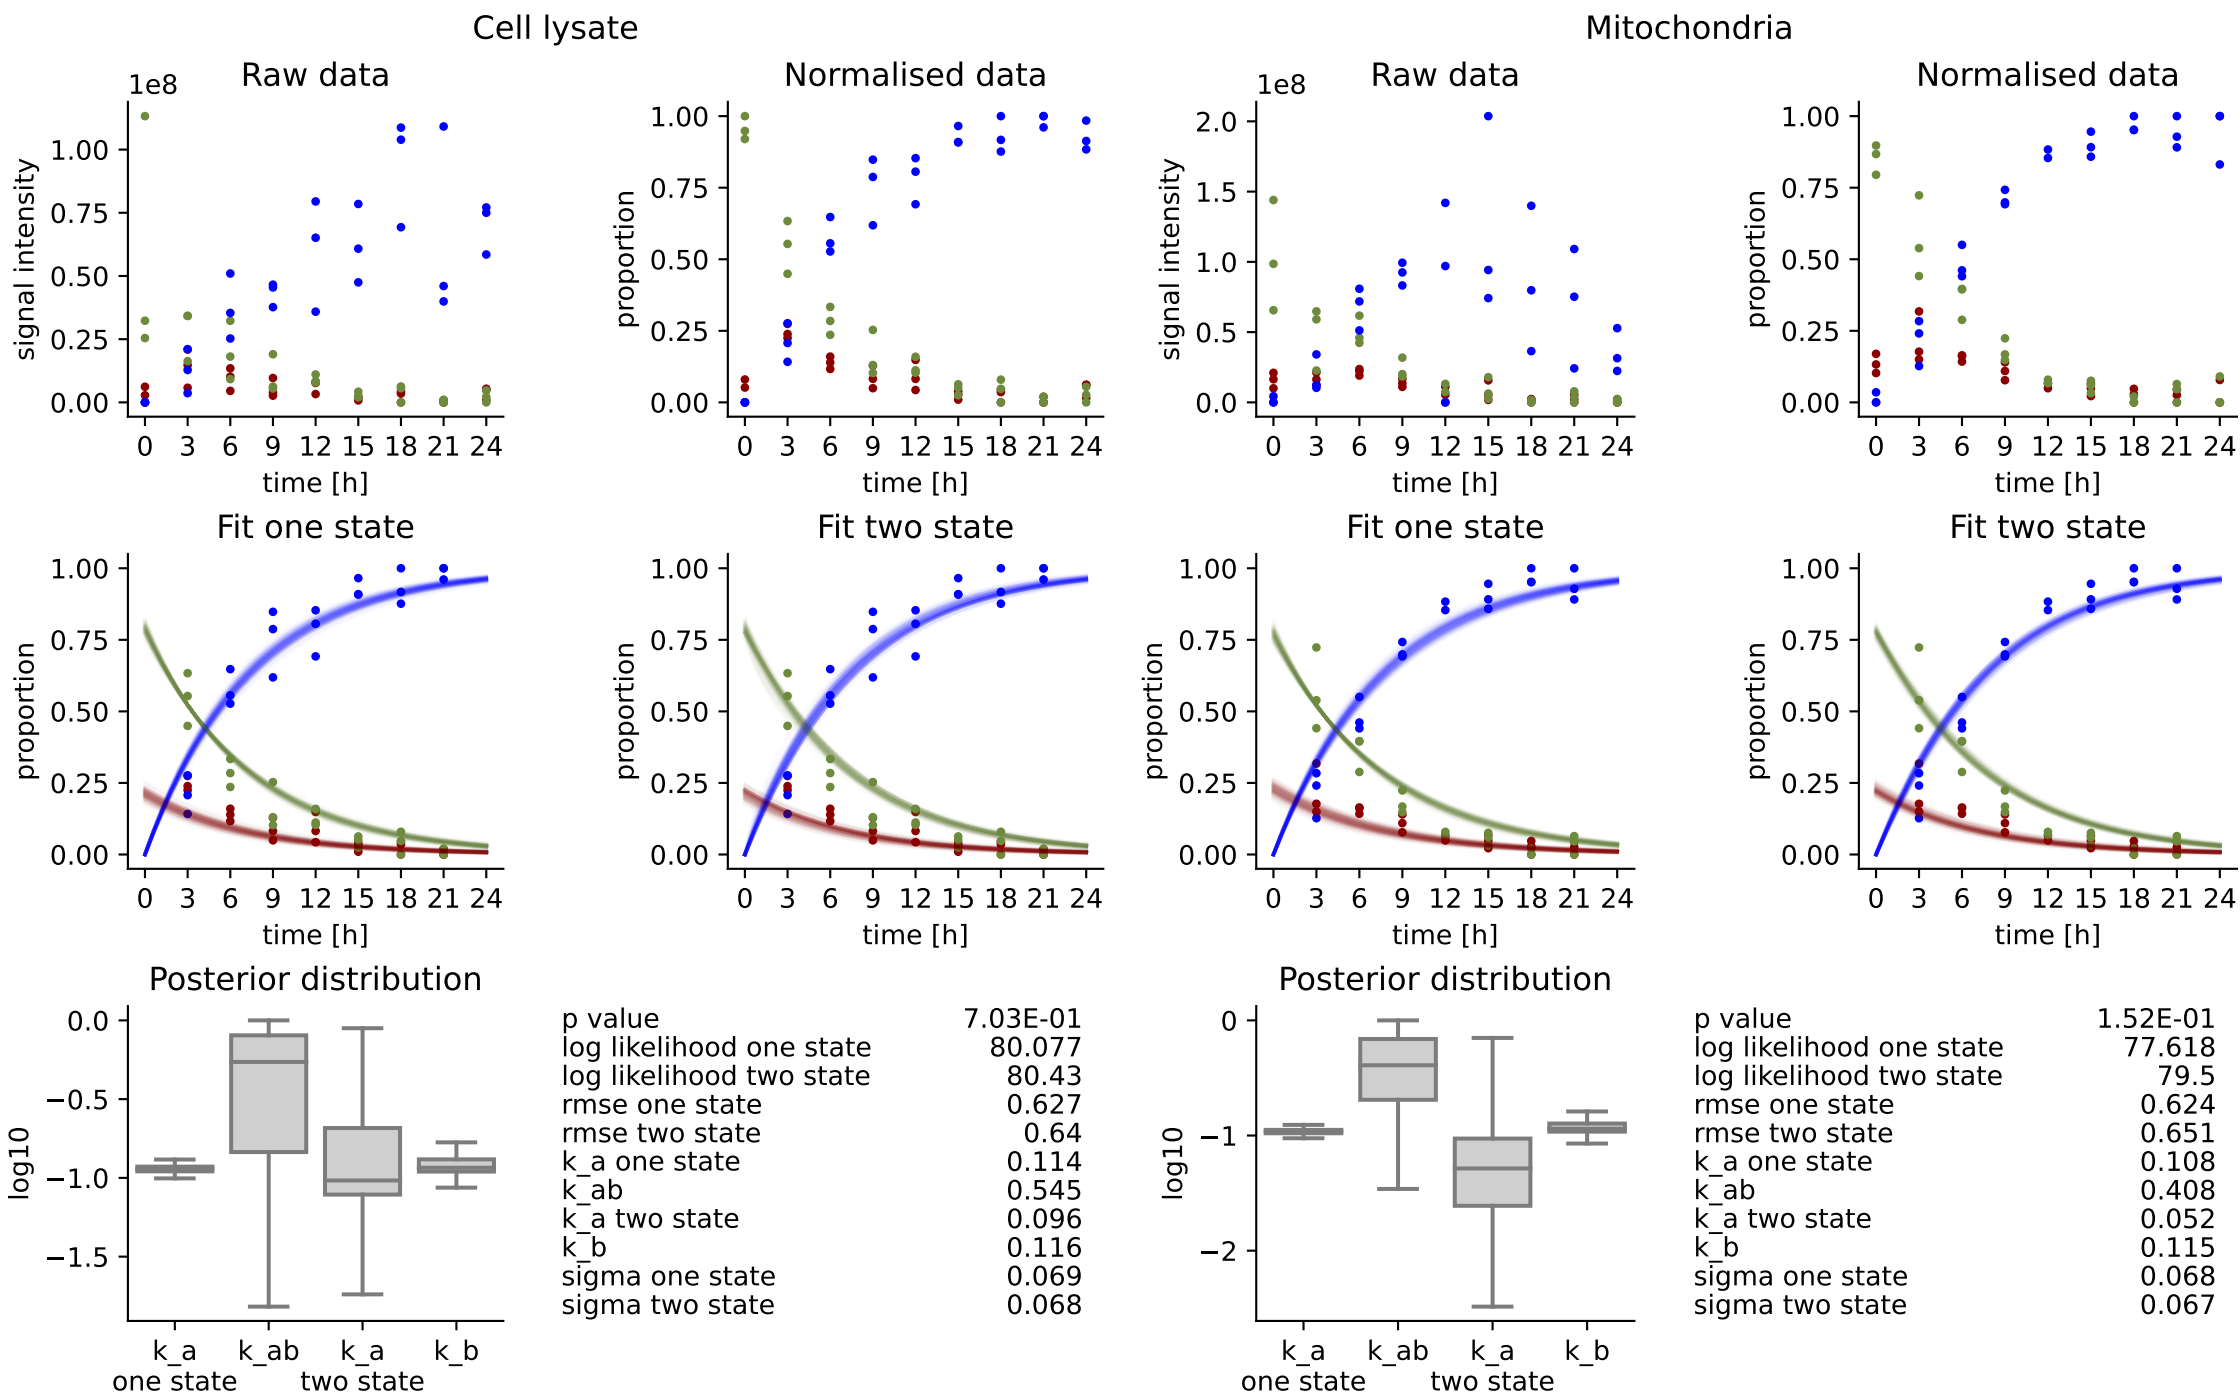

TRUB2  
 TRUB2  
 O95900  
 Probable tRNA pseudouridine synthase 2

Cell lysate

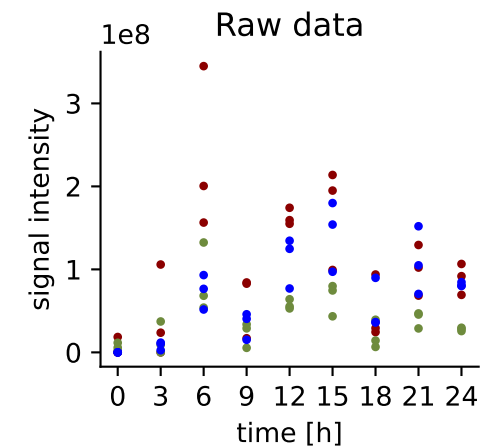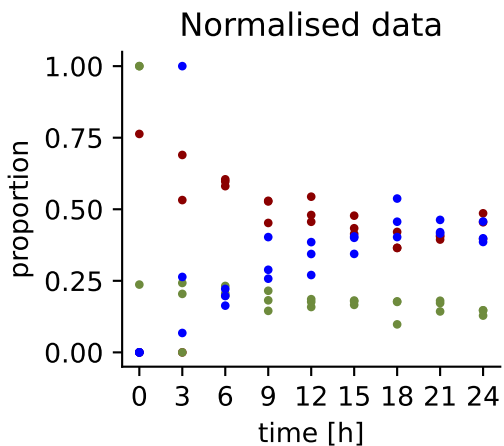

Mitochondria

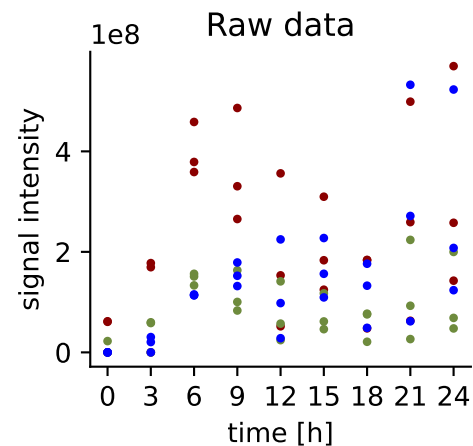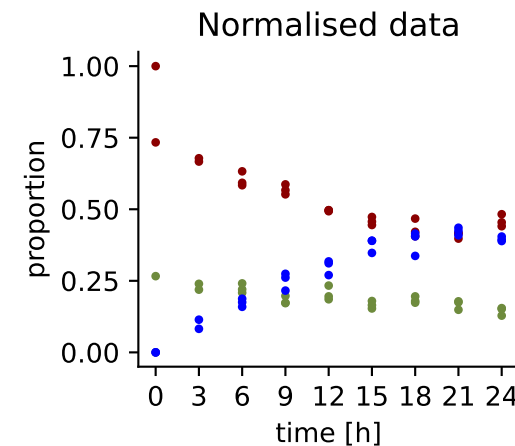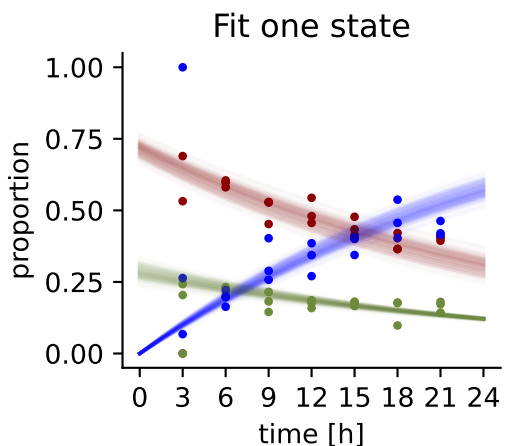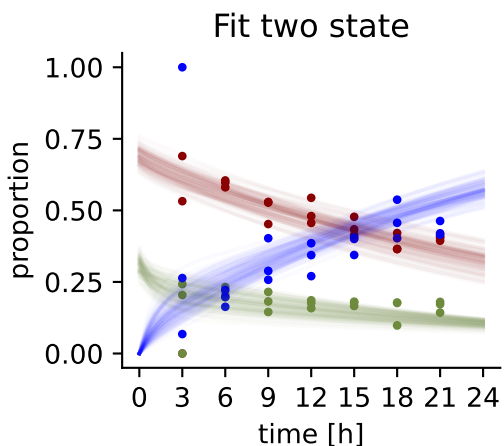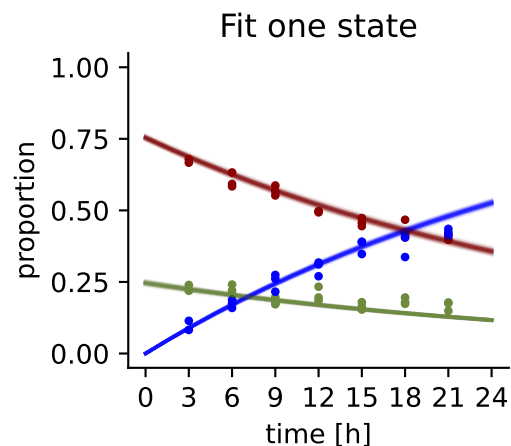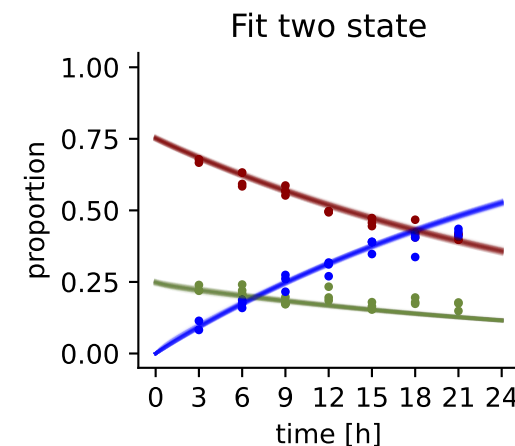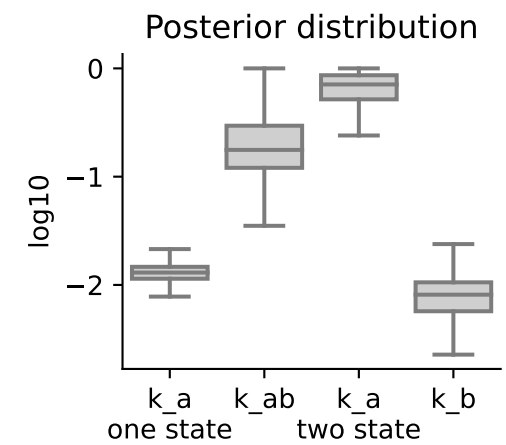

|                          |          |
|--------------------------|----------|
| p value                  | 6.65E-03 |
| log likelihood one state | 29.534   |
| log likelihood two state | 34.546   |
| rmse one state           | 0.405    |
| rmse two state           | 0.301    |
| k_a one state            | 0.013    |
| k_ab                     | 0.177    |
| k_a two state            | 0.711    |
| k_b                      | 0.008    |
| sigma one state          | 0.152    |
| sigma two state          | 0.144    |

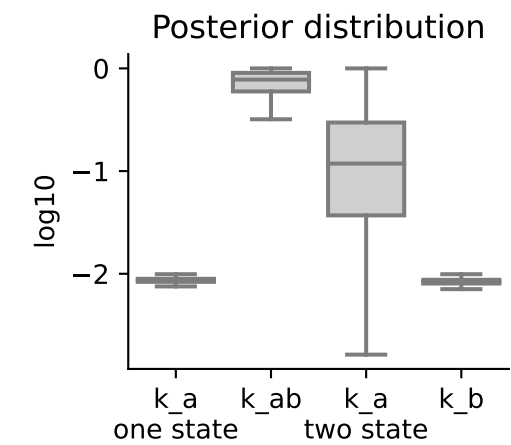

|                          |          |
|--------------------------|----------|
| p value                  | 8.88E-02 |
| log likelihood one state | 125.212  |
| log likelihood two state | 127.633  |
| rmse one state           | 0.307    |
| rmse two state           | 0.311    |
| k_a one state            | 0.009    |
| k_ab                     | 0.778    |
| k_a two state            | 0.118    |
| k_b                      | 0.008    |
| sigma one state          | 0.031    |
| sigma two state          | 0.031    |

DHX30  
DHX30  
Q7L2E3

Putative ATP-dependent RNA helicase DHX30

Cell lysate

Mitochondria

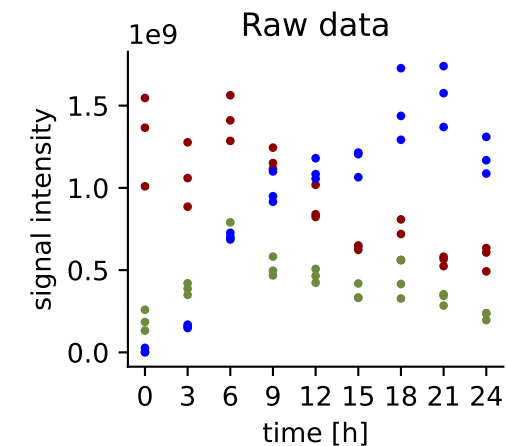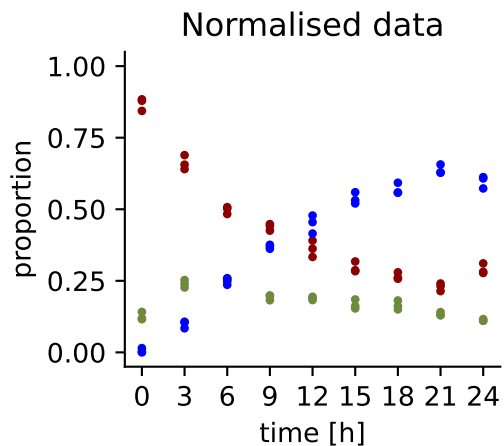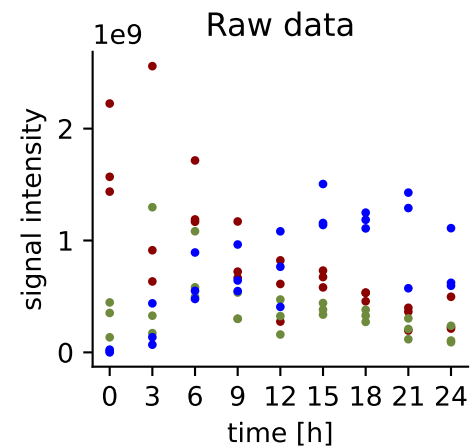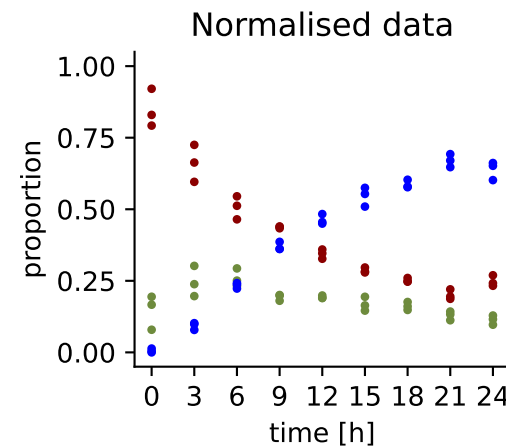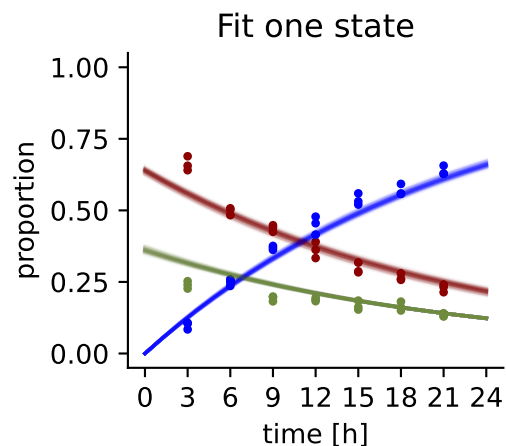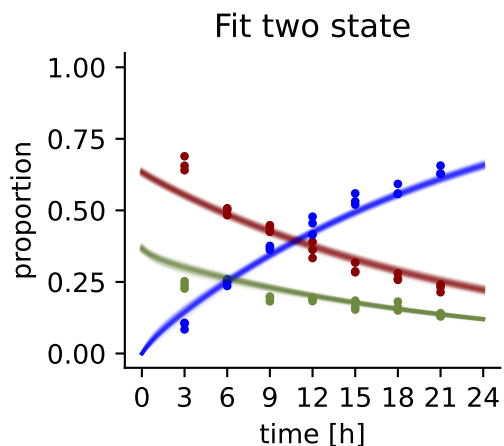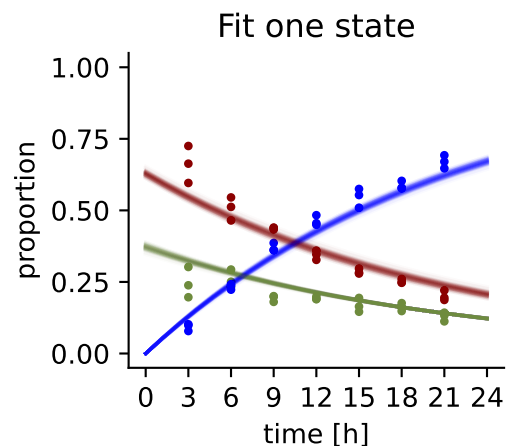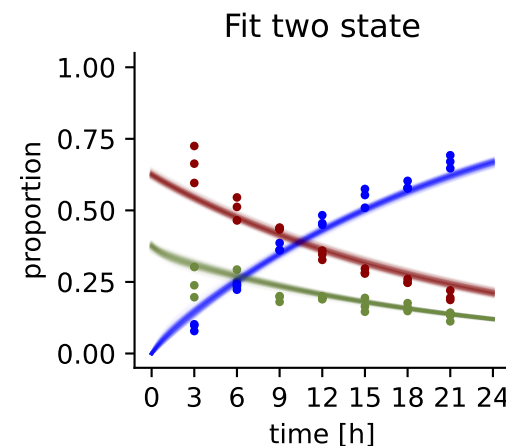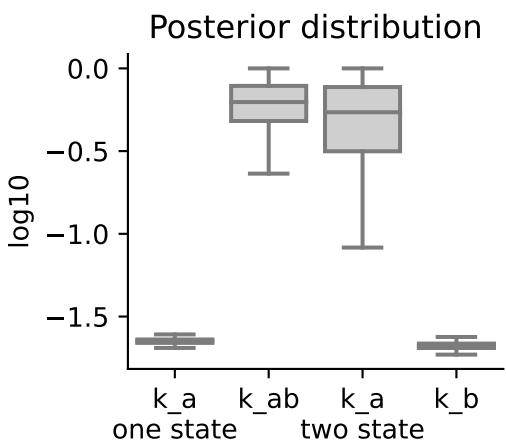

|                          |          |
|--------------------------|----------|
| p value                  | 8.61E-02 |
| log likelihood one state | 114.496  |
| log likelihood two state | 116.948  |
| rmse one state           | 0.424    |
| rmse two state           | 0.402    |
| k_a one state            | 0.022    |
| k_ab                     | 0.626    |
| k_a two state            | 0.543    |
| k_b                      | 0.021    |
| sigma one state          | 0.04     |
| sigma two state          | 0.039    |

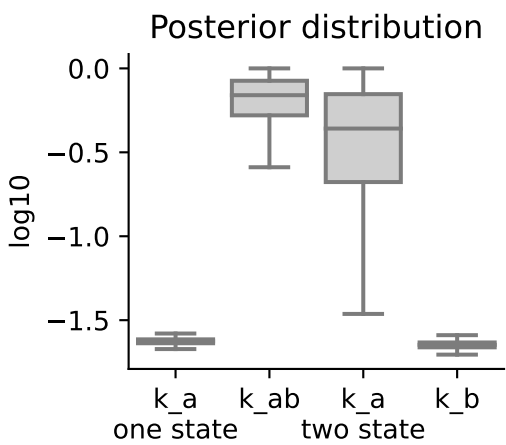

|                          |          |
|--------------------------|----------|
| p value                  | 4.75E-01 |
| log likelihood one state | 103.89   |
| log likelihood two state | 104.635  |
| rmse one state           | 0.438    |
| rmse two state           | 0.423    |
| k_a one state            | 0.024    |
| k_ab                     | 0.692    |
| k_a two state            | 0.438    |
| k_b                      | 0.023    |
| sigma one state          | 0.047    |
| sigma two state          | 0.047    |

MPV17L2  
MPV17L2  
Q567V2  
Mpv17-like protein 2

Cell lysate

Mitochondria

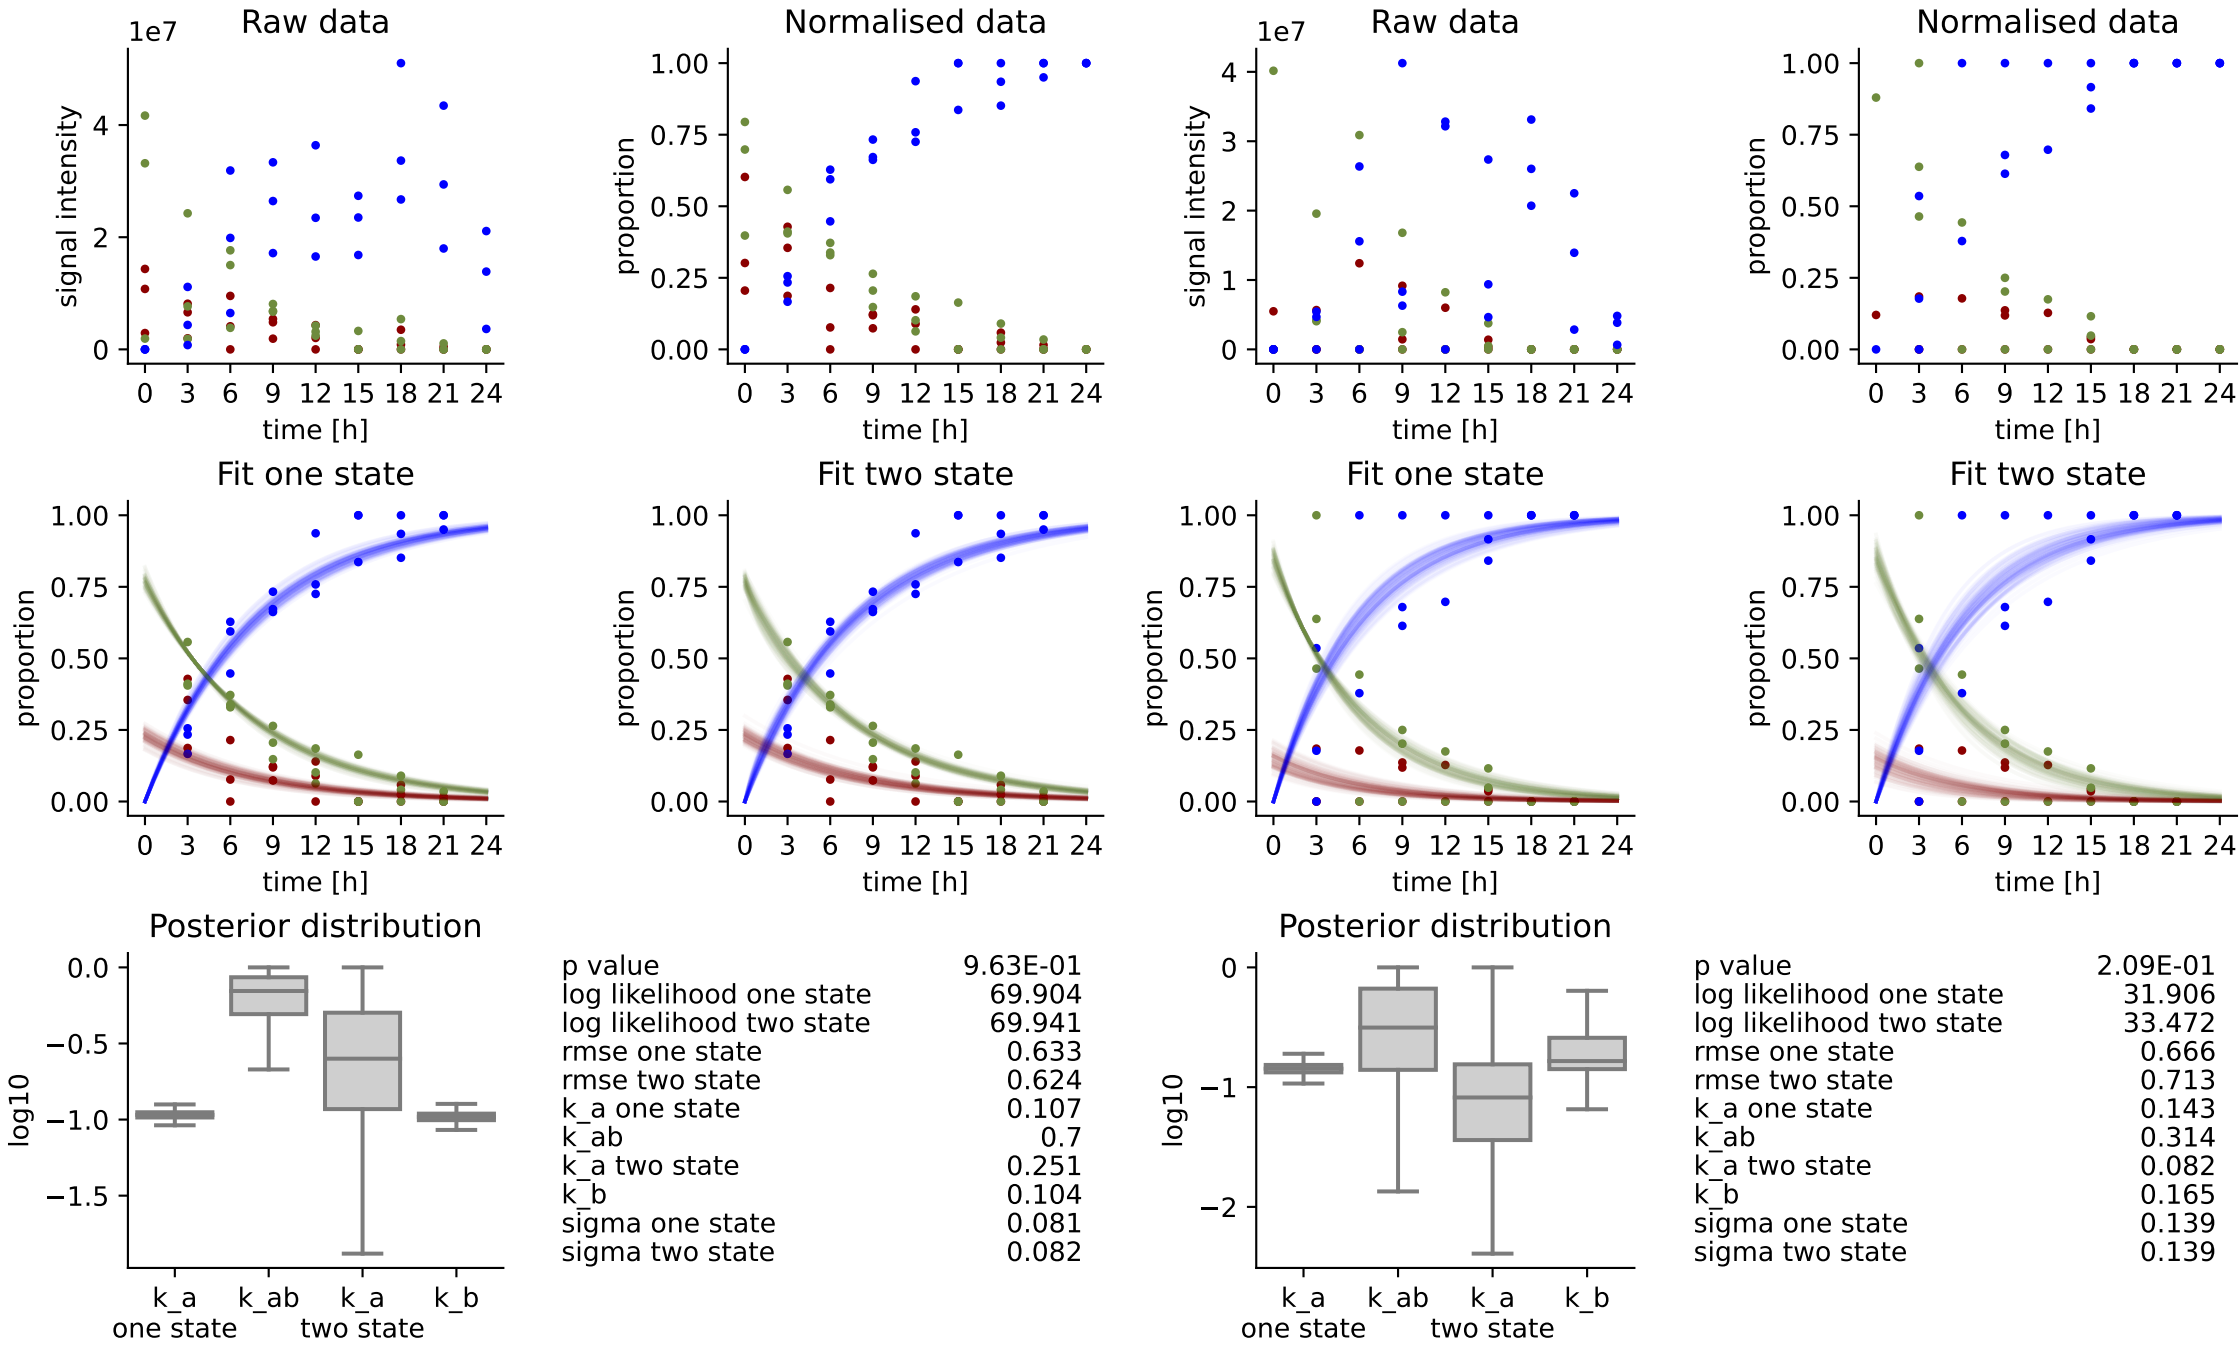



SLIRP  
SLIRP  
Q9GZT3  
SRA stem-loop-interacting RNA-binding protein, mitochondrial

Cell lysate

Mitochondria

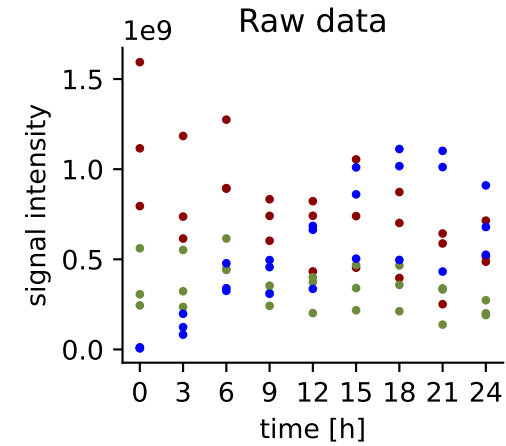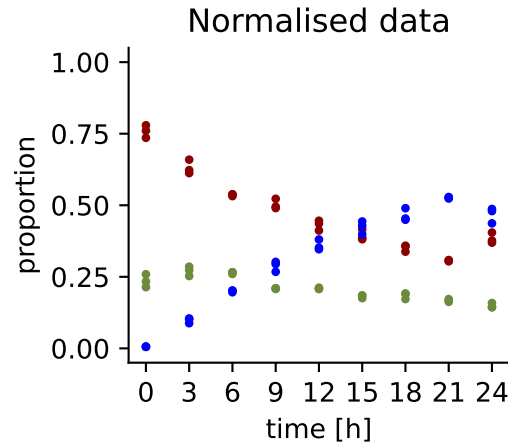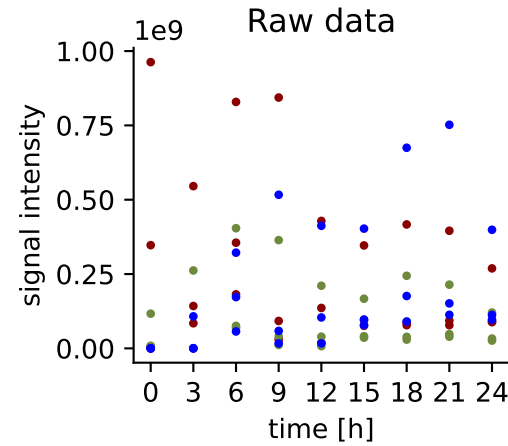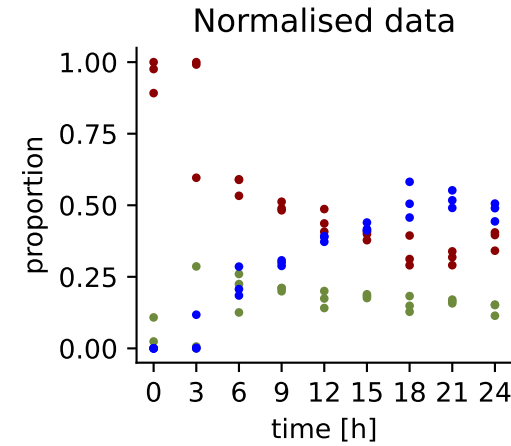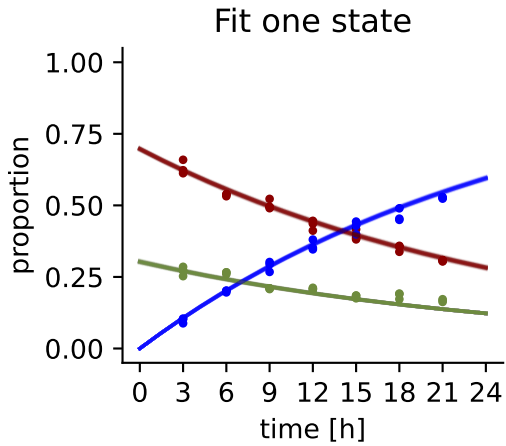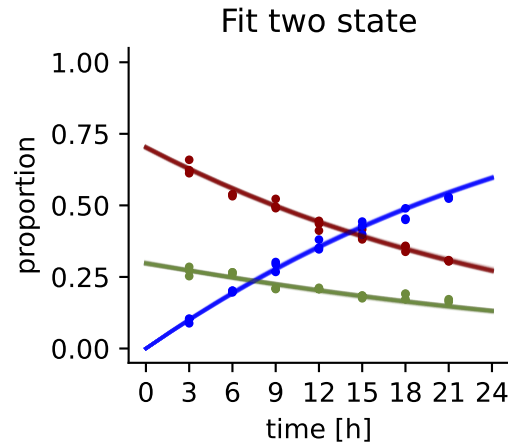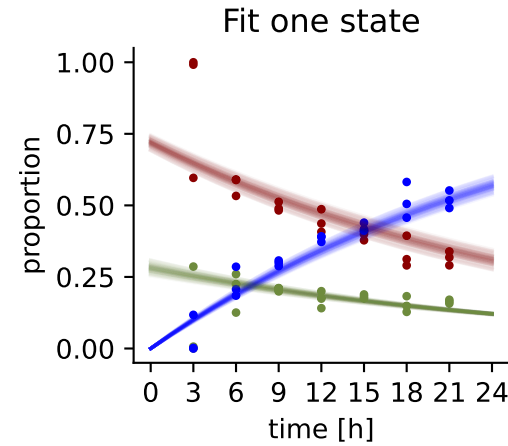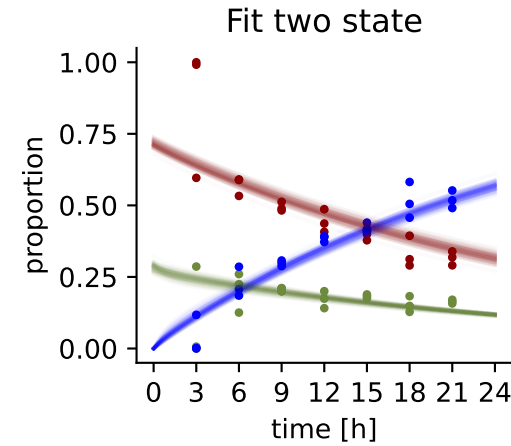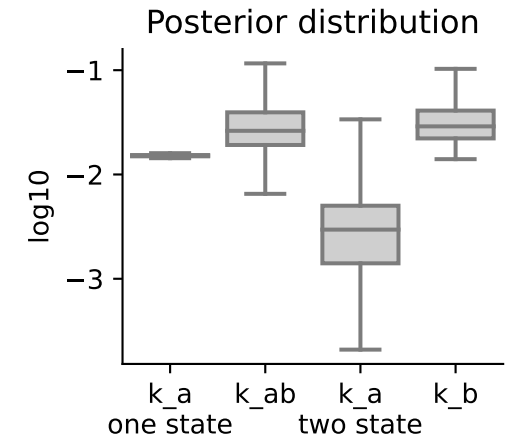

|                          |          |
|--------------------------|----------|
| p value                  | 2.04E-04 |
| log likelihood one state | 160.555  |
| log likelihood two state | 169.054  |
| rmse one state           | 0.344    |
| rmse two state           | 0.353    |
| k_a one state            | 0.015    |
| k_ab                     | 0.026    |
| k_a two state            | 0.003    |
| k_b                      | 0.029    |
| sigma one state          | 0.019    |
| sigma two state          | 0.017    |

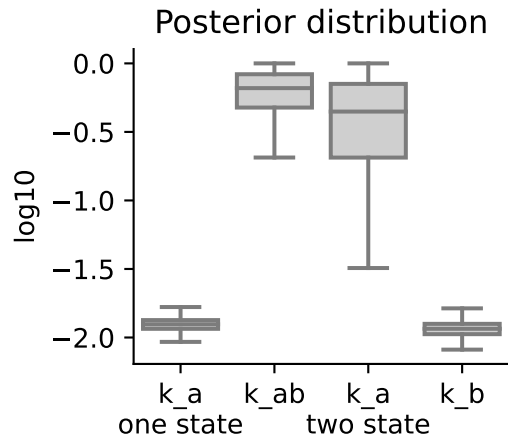

|                          |          |
|--------------------------|----------|
| p value                  | 9.15E-01 |
| log likelihood one state | 64.456   |
| log likelihood two state | 64.544   |
| rmse one state           | 0.399    |
| rmse two state           | 0.401    |
| k_a one state            | 0.012    |
| k_ab                     | 0.66     |
| k_a two state            | 0.445    |
| k_b                      | 0.012    |
| sigma one state          | 0.088    |
| sigma two state          | 0.088    |

LRPPRC  
LRPPRC  
P42704

Leucine-rich PPR motif-containing protein, mitochondrial

Cell lysate

Mitochondria

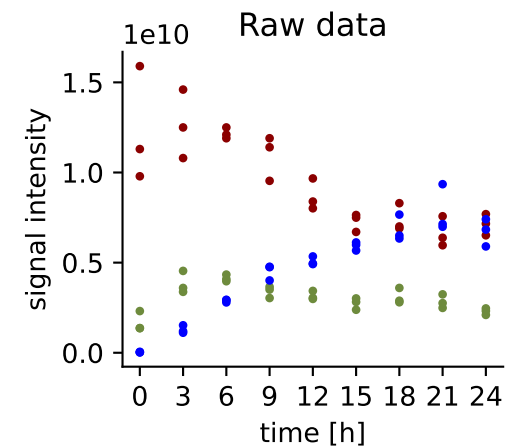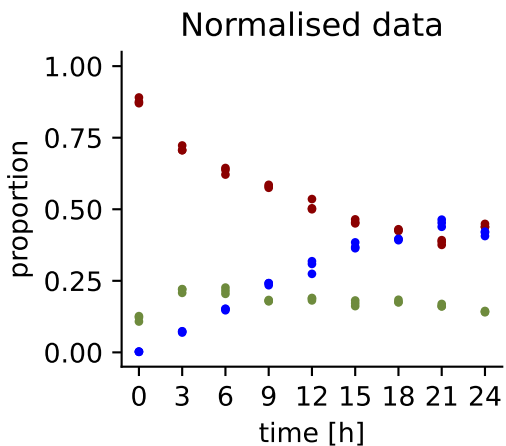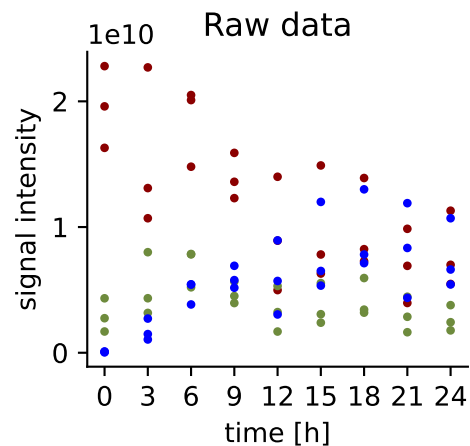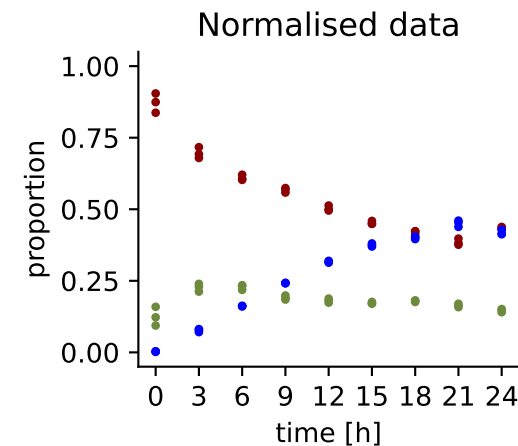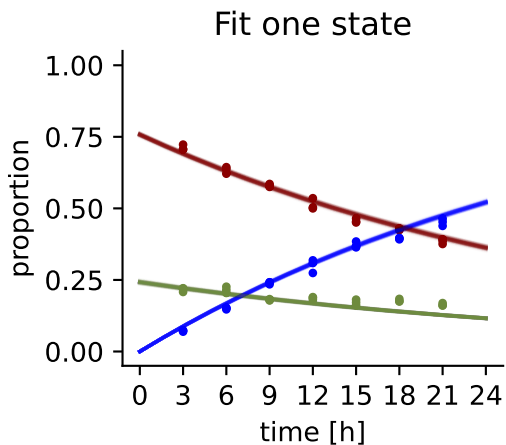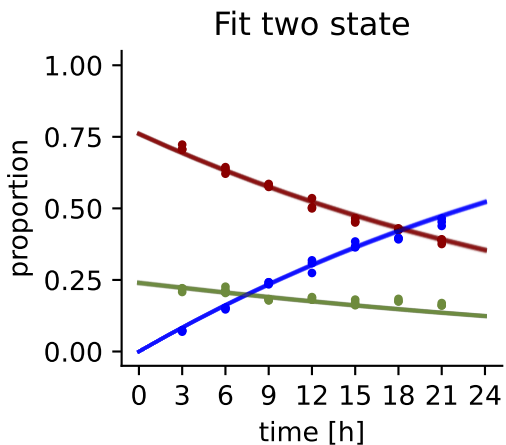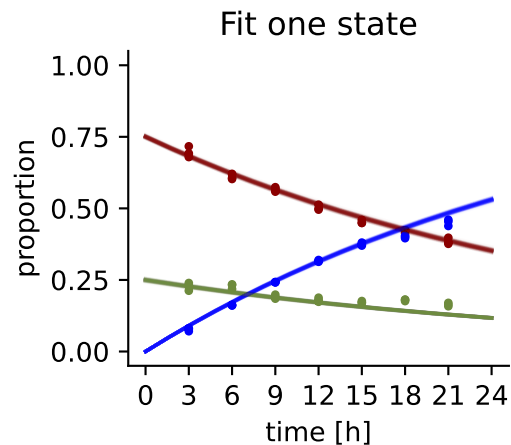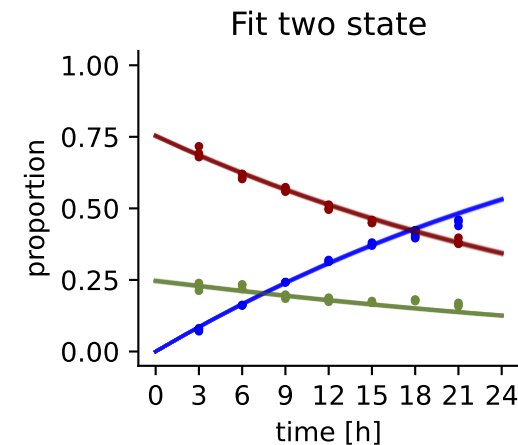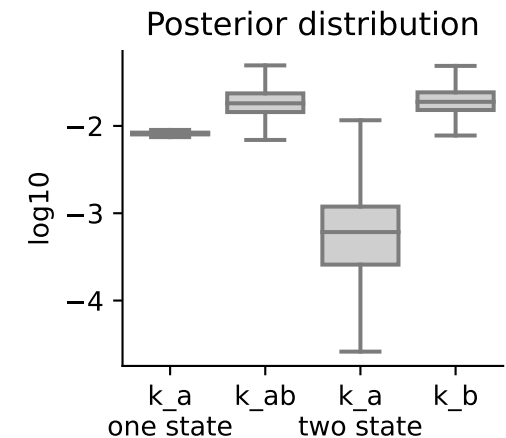

|                          |          |
|--------------------------|----------|
| p value                  | 2.36E-06 |
| log likelihood one state | 156.791  |
| log likelihood two state | 169.749  |
| rmse one state           | 0.306    |
| rmse two state           | 0.311    |
| k_a one state            | 0.008    |
| k_ab                     | 0.018    |
| k_a two state            | 0.001    |
| k_b                      | 0.019    |
| sigma one state          | 0.021    |
| sigma two state          | 0.017    |

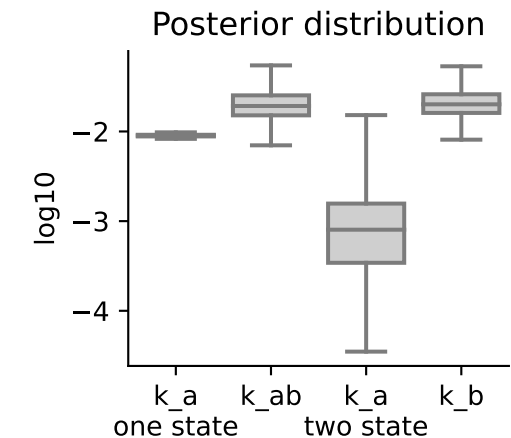

|                          |          |
|--------------------------|----------|
| p value                  | 6.06E-06 |
| log likelihood one state | 160.032  |
| log likelihood two state | 172.046  |
| rmse one state           | 0.308    |
| rmse two state           | 0.313    |
| k_a one state            | 0.009    |
| k_ab                     | 0.019    |
| k_a two state            | 0.001    |
| k_b                      | 0.02     |
| sigma one state          | 0.019    |
| sigma two state          | 0.017    |

GRSF1  
GRSF1  
Q12849  
G-rich sequence factor 1

Cell lysate

Mitochondria

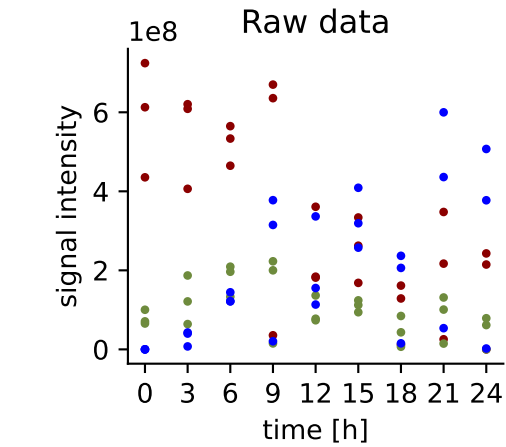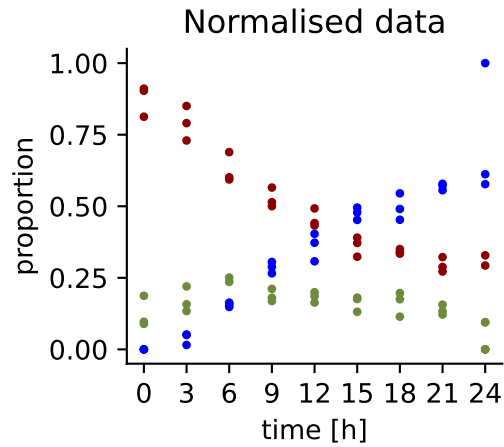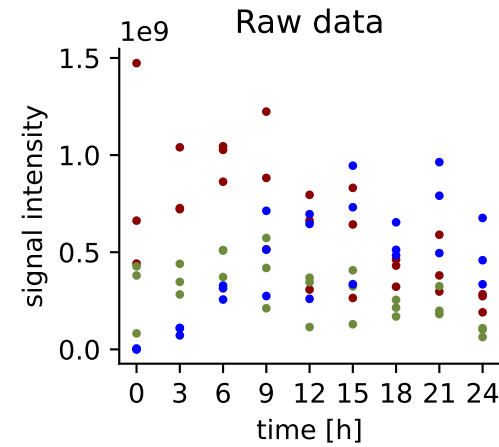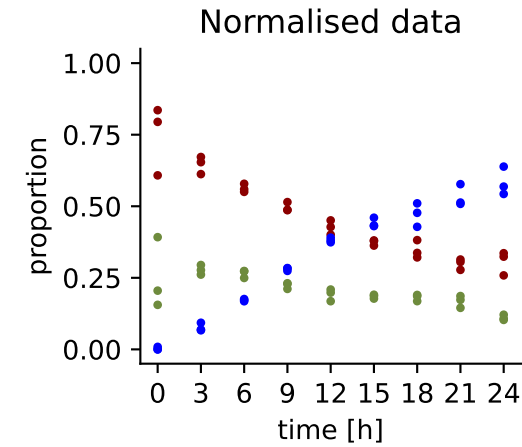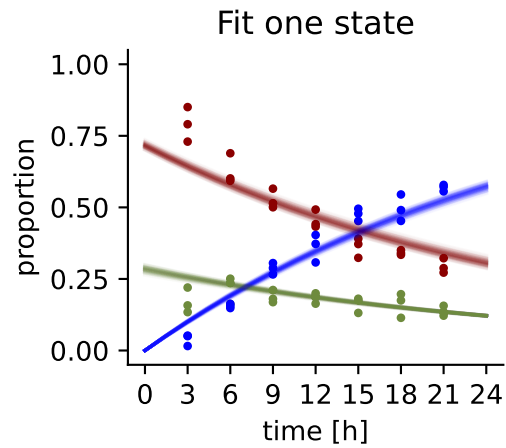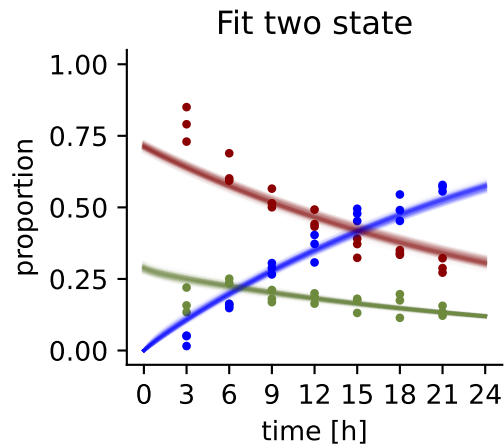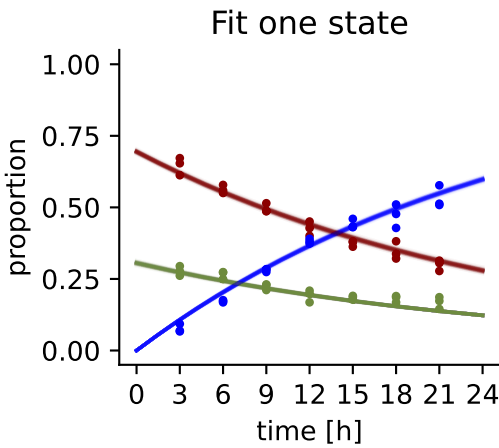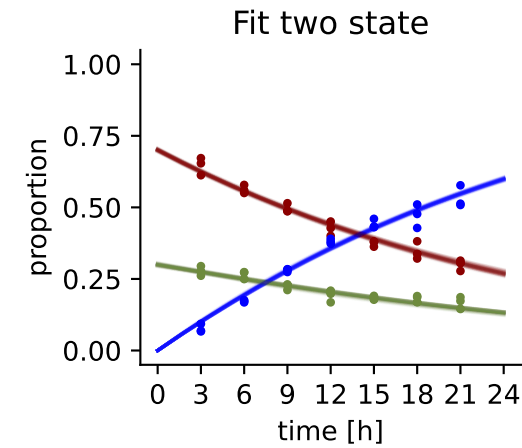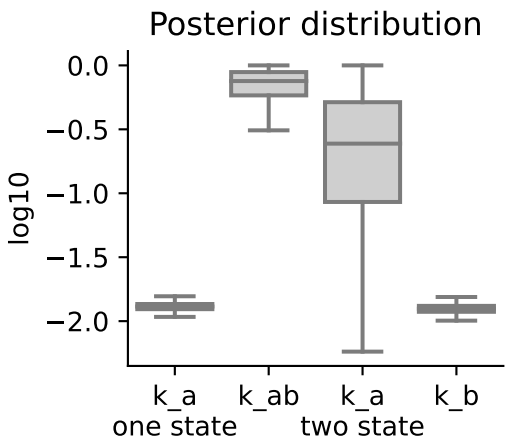

|                          |          |
|--------------------------|----------|
| p value                  | 5.86E-01 |
| log likelihood one state | 91.516   |
| log likelihood two state | 92.051   |
| rmse one state           | 0.388    |
| rmse two state           | 0.392    |
| k_a one state            | 0.013    |
| k_ab                     | 0.754    |
| k_a two state            | 0.244    |
| k_b                      | 0.012    |
| sigma one state          | 0.058    |
| sigma two state          | 0.058    |

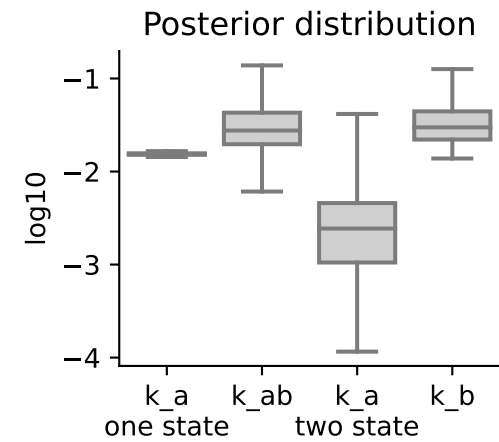

|                          |          |
|--------------------------|----------|
| p value                  | 3.08E-04 |
| log likelihood one state | 143.201  |
| log likelihood two state | 151.286  |
| rmse one state           | 0.353    |
| rmse two state           | 0.362    |
| k_a one state            | 0.015    |
| k_ab                     | 0.028    |
| k_a two state            | 0.002    |
| k_b                      | 0.03     |
| sigma one state          | 0.025    |
| sigma two state          | 0.023    |

ELAC2  
ELAC2  
Q9BQ52  
Zinc phosphodiesterase ELAC protein 2

Cell lysate

Mitochondria

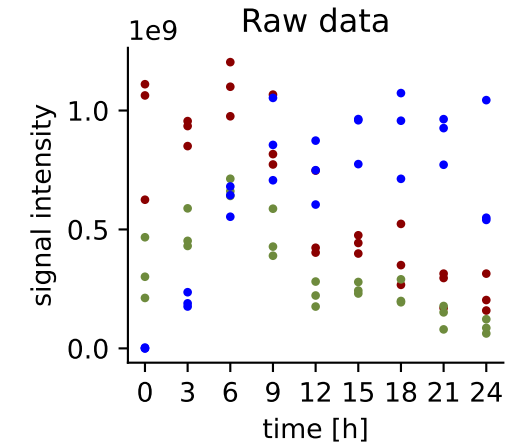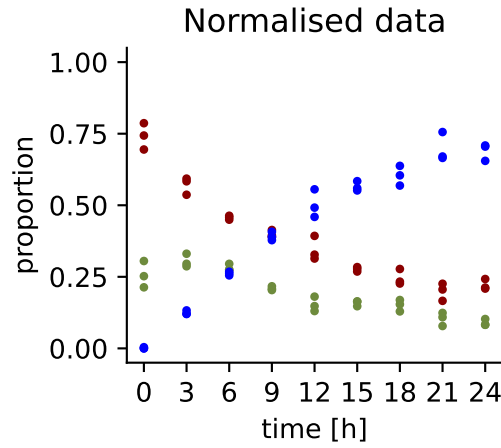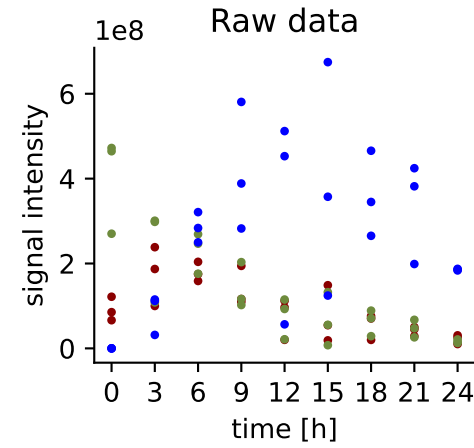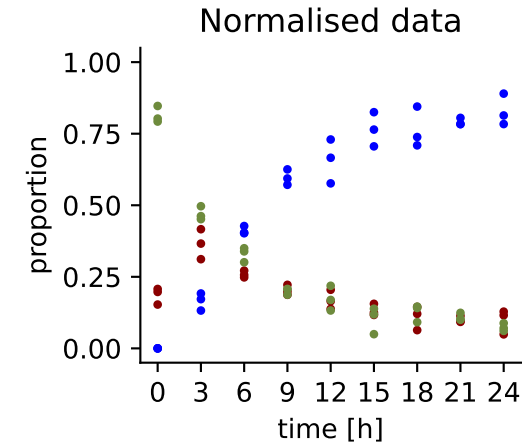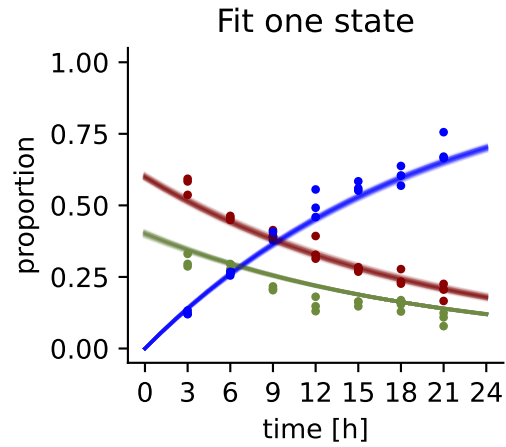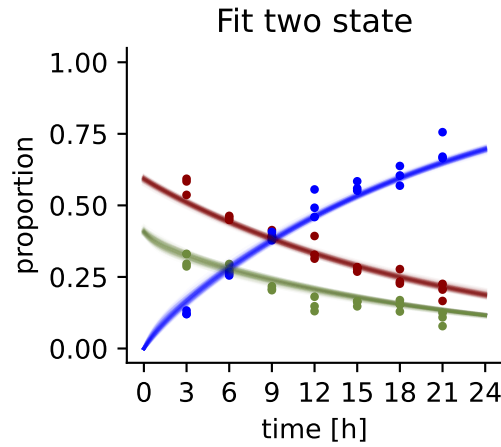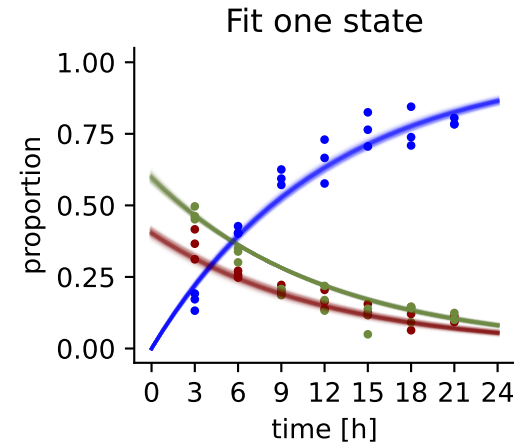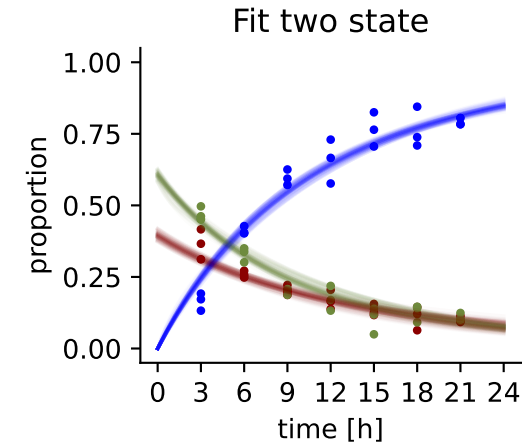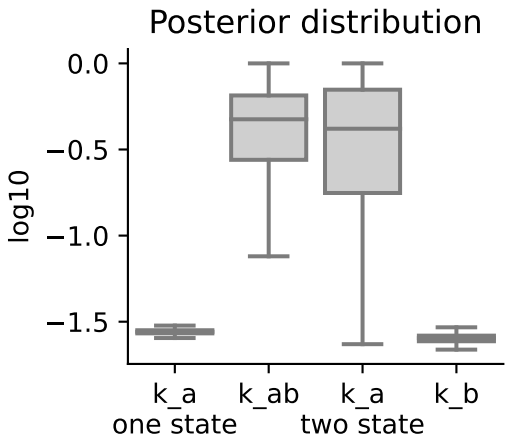

|                          |          |
|--------------------------|----------|
| p value                  | 1.32E-03 |
| log likelihood one state | 116.182  |
| log likelihood two state | 122.809  |
| rmse one state           | 0.447    |
| rmse two state           | 0.428    |
| k_a one state            | 0.028    |
| k_ab                     | 0.474    |
| k_a two state            | 0.417    |
| k_b                      | 0.025    |
| sigma one state          | 0.039    |
| sigma two state          | 0.037    |

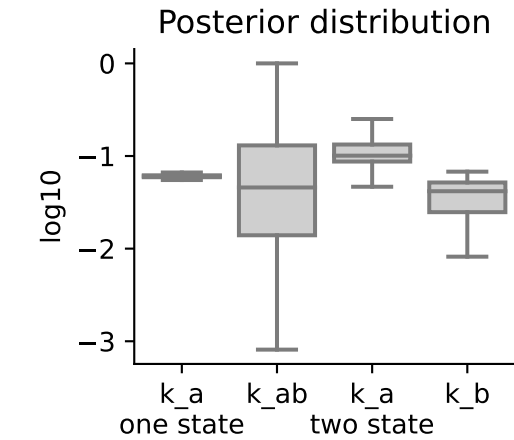

|                          |          |
|--------------------------|----------|
| p value                  | 1.26E-04 |
| log likelihood one state | 99.426   |
| log likelihood two state | 108.405  |
| rmse one state           | 0.537    |
| rmse two state           | 0.51     |
| k_a one state            | 0.06     |
| k_ab                     | 0.046    |
| k_a two state            | 0.101    |
| k_b                      | 0.042    |
| sigma one state          | 0.051    |
| sigma two state          | 0.047    |

MRPP1  
TRMT10C  
Q7LOY3  
Mitochondrial ribonuclease P protein 1

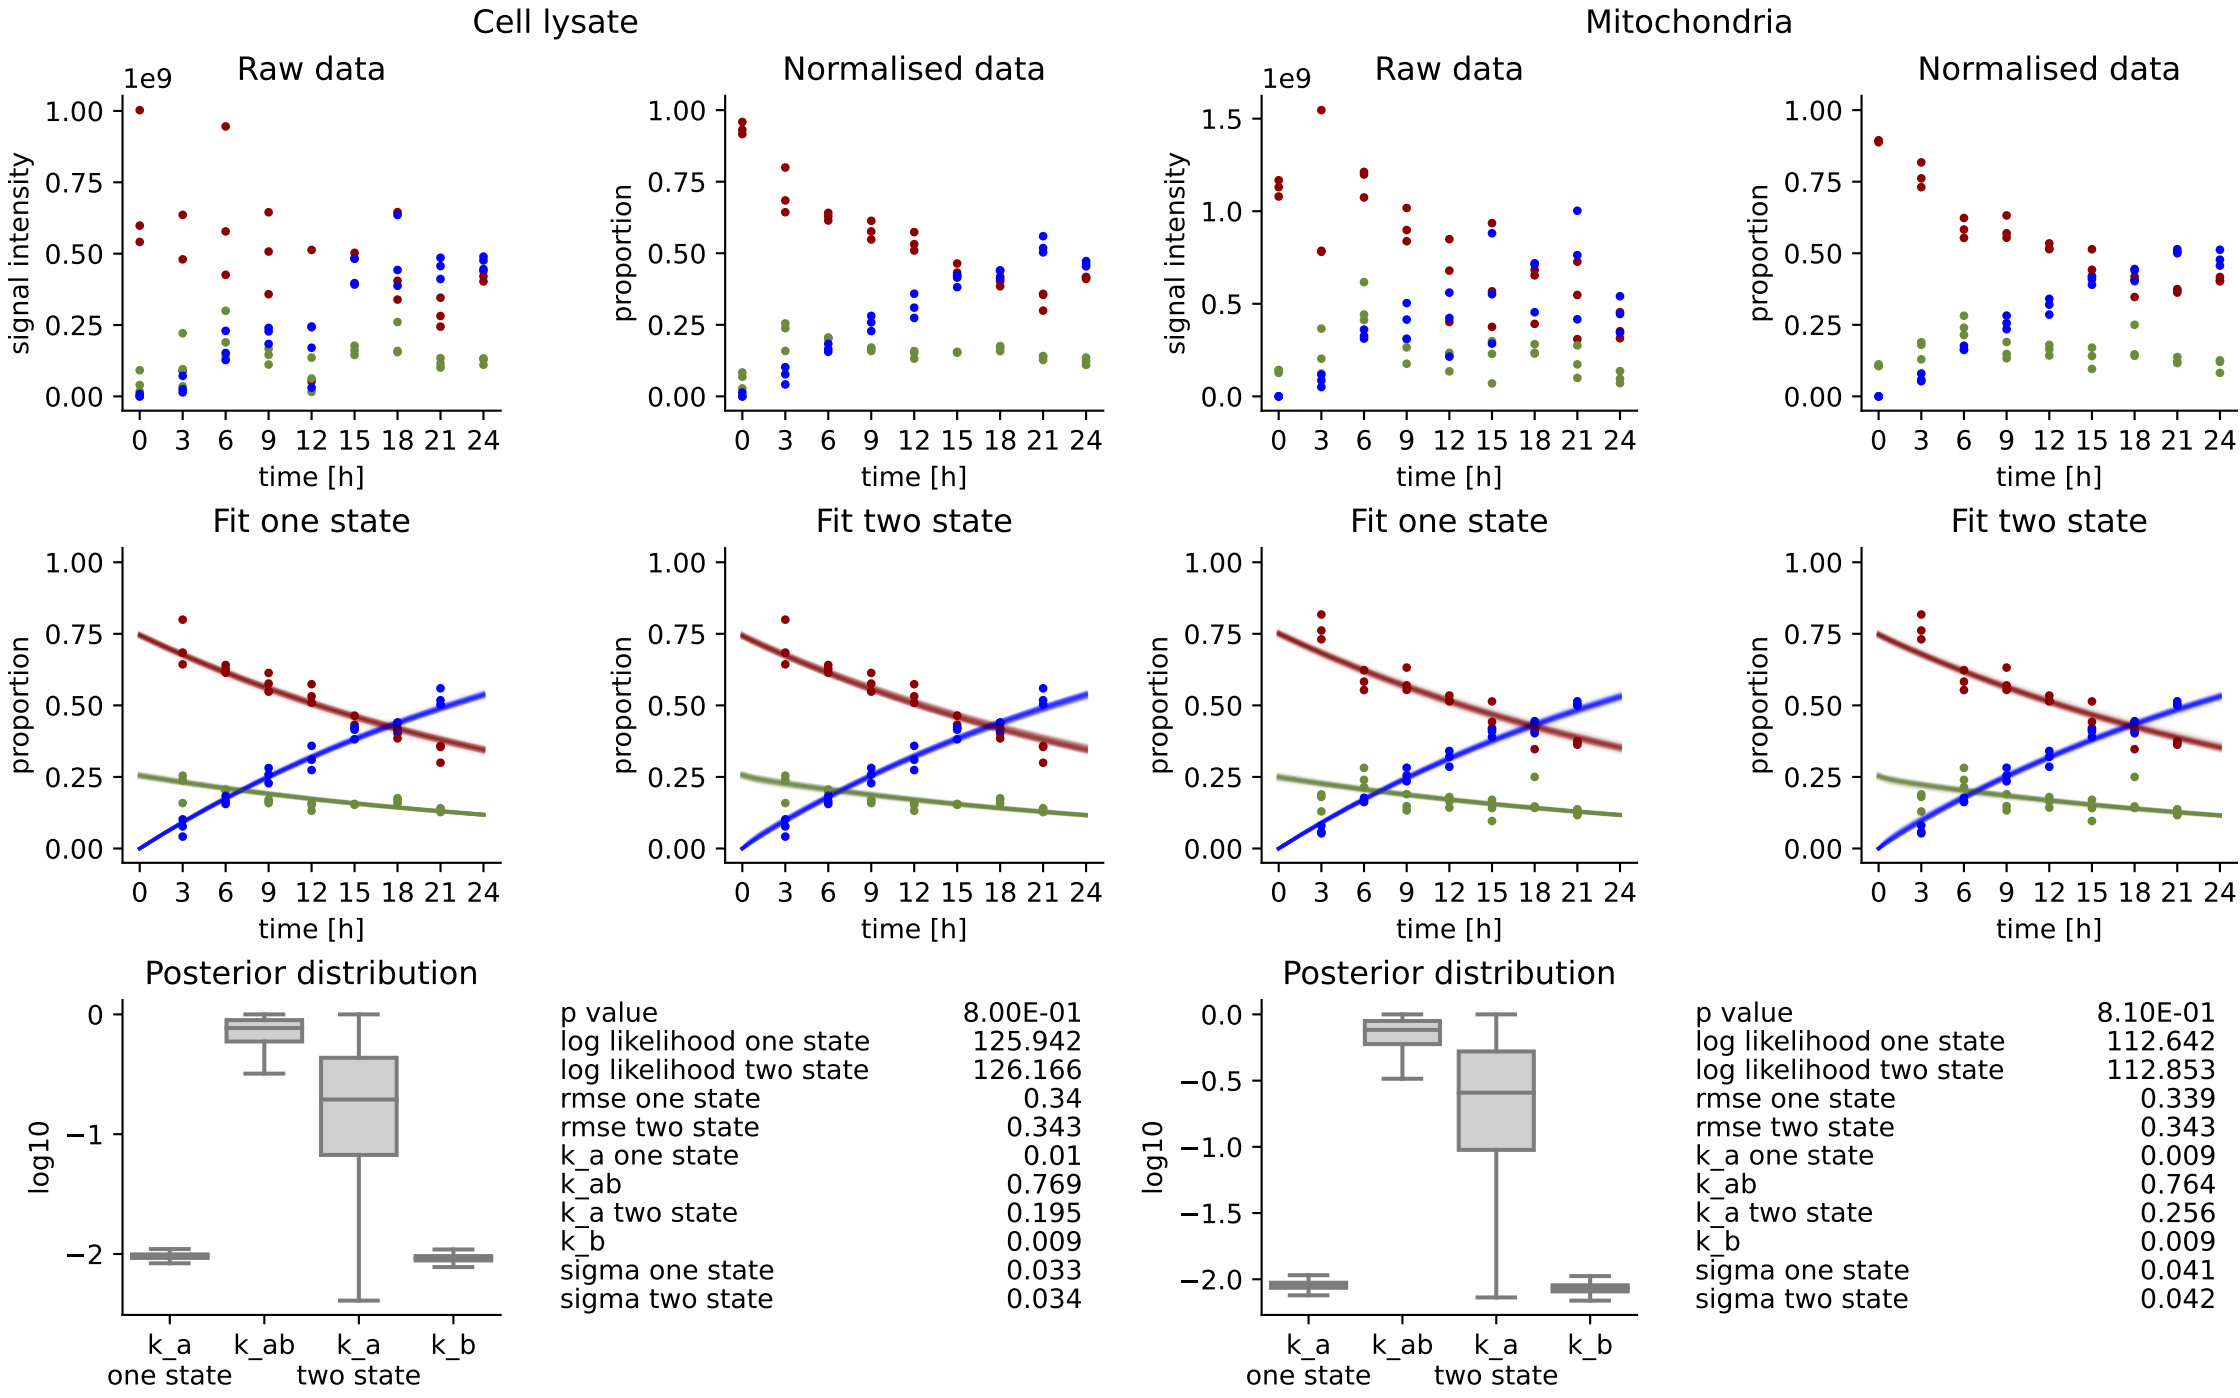

MRPP2  
HSD17B10  
Q99714  
3-hydroxyacyl-CoA dehydrogenase type-2

Cell lysate

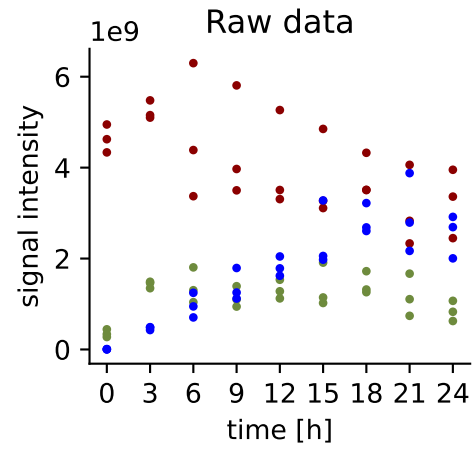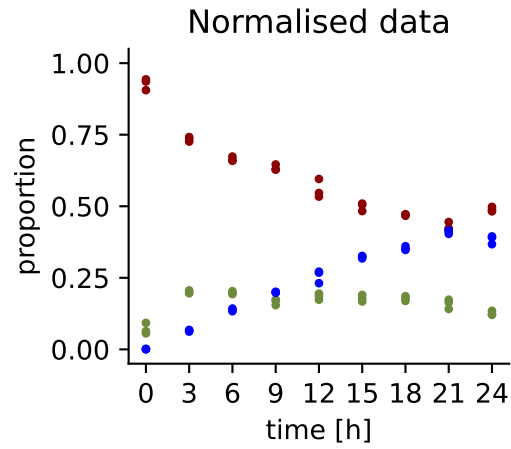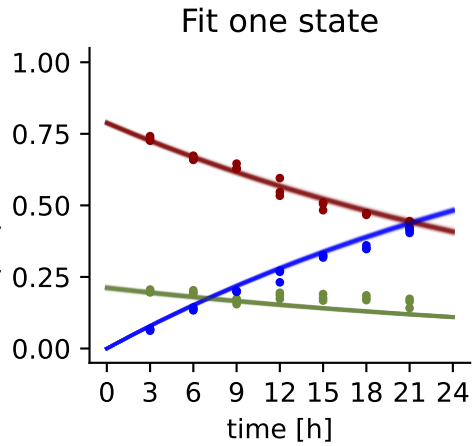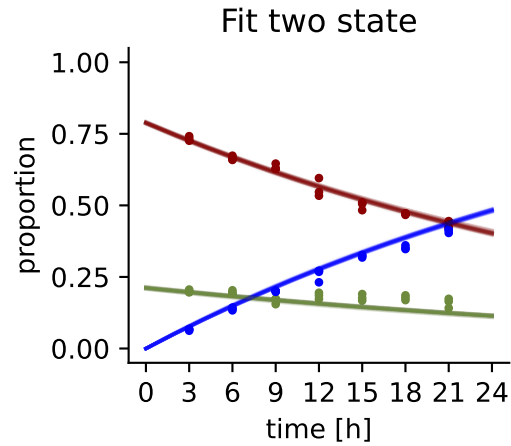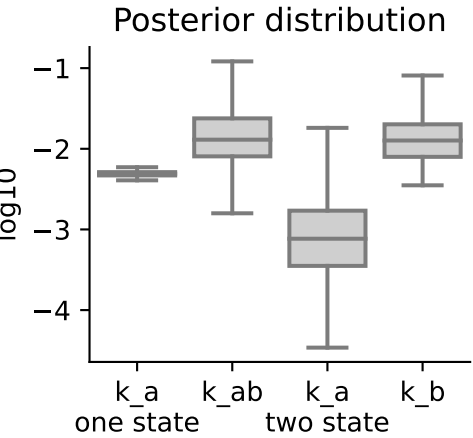

|                          |          |
|--------------------------|----------|
| p value                  | 2.47E-04 |
| log likelihood one state | 141.625  |
| log likelihood two state | 149.931  |
| rmse one state           | 0.279    |
| rmse two state           | 0.281    |
| k_a one state            | 0.005    |
| k_ab                     | 0.013    |
| k_a two state            | 0.001    |
| k_b                      | 0.013    |
| sigma one state          | 0.026    |
| sigma two state          | 0.025    |

Mitochondria

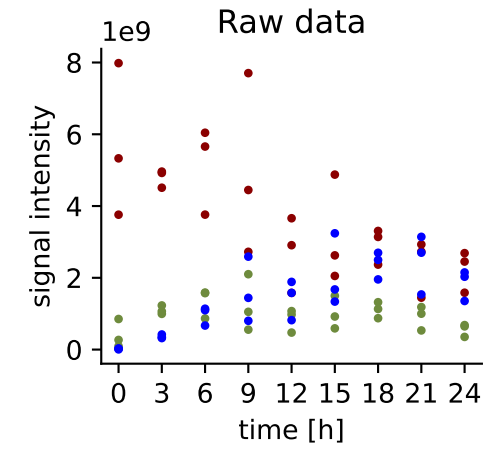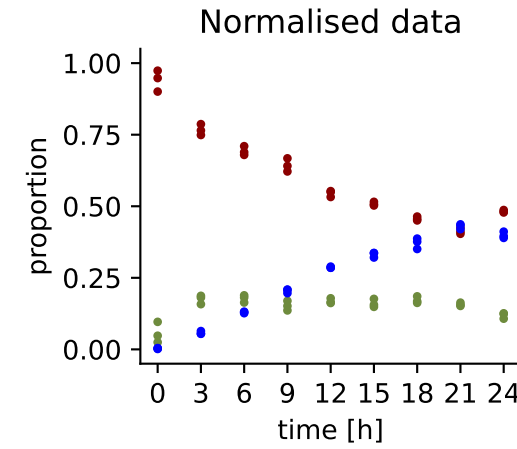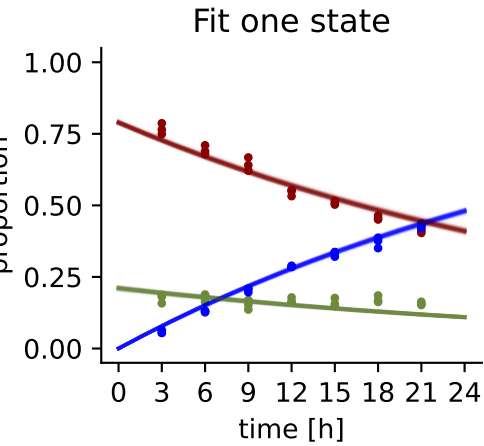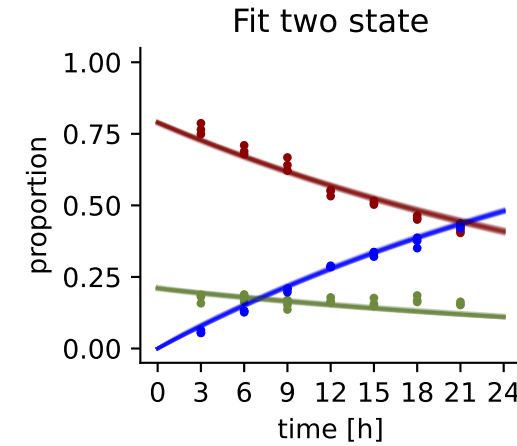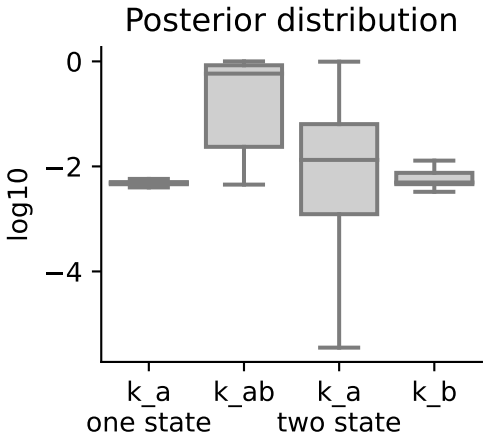

|                          |          |
|--------------------------|----------|
| p value                  | 2.76E-03 |
| log likelihood one state | 142.388  |
| log likelihood two state | 148.281  |
| rmse one state           | 0.294    |
| rmse two state           | 0.297    |
| k_a one state            | 0.005    |
| k_ab                     | 0.585    |
| k_a two state            | 0.013    |
| k_b                      | 0.005    |
| sigma one state          | 0.026    |
| sigma two state          | 0.025    |

MRPP3  
KIAA0391  
O15091  
Mitochondrial ribonuclease P protein 3

Cell lysate

Raw data

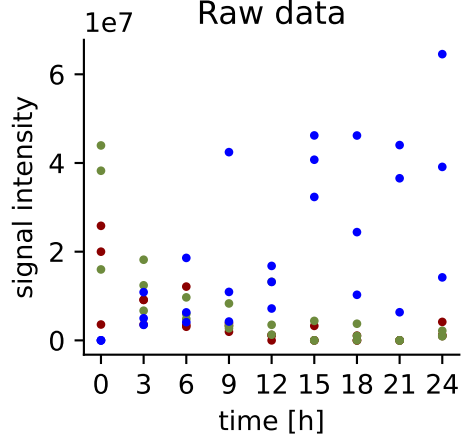

Normalised data

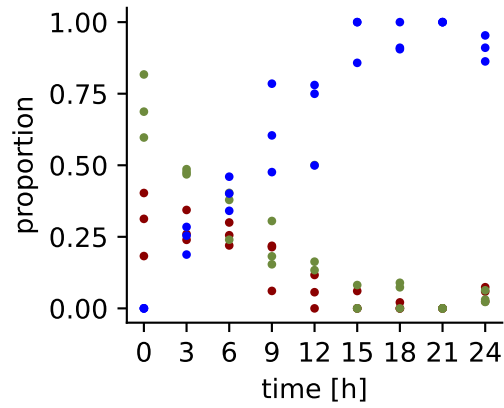

Fit one state

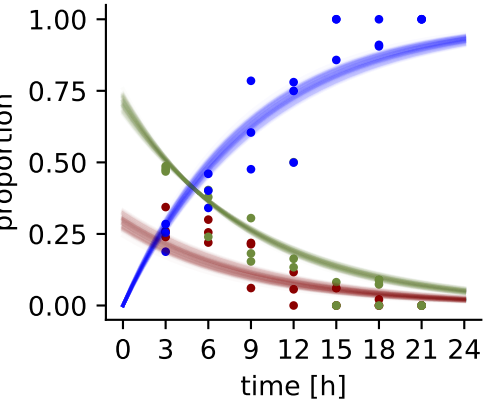

Fit two state

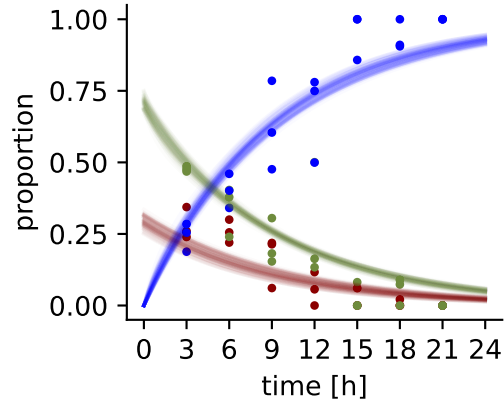

Posterior distribution

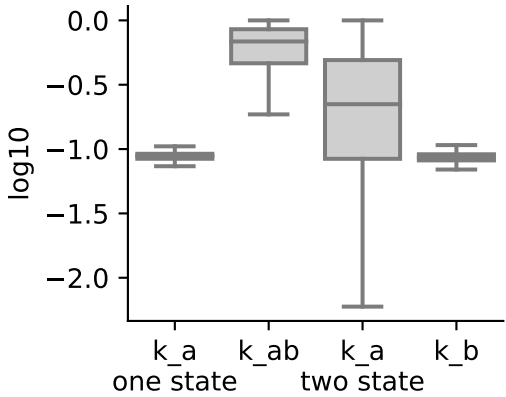

|                          |          |
|--------------------------|----------|
| p value                  | 8.50E-01 |
| log likelihood one state | 58.119   |
| log likelihood two state | 58.281   |
| rmse one state           | 0.633    |
| rmse two state           | 0.649    |
| k_a one state            | 0.088    |
| k_ab                     | 0.686    |
| k_a two state            | 0.223    |
| k_b                      | 0.086    |
| sigma one state          | 0.098    |
| sigma two state          | 0.098    |

Mitochondria

Raw data

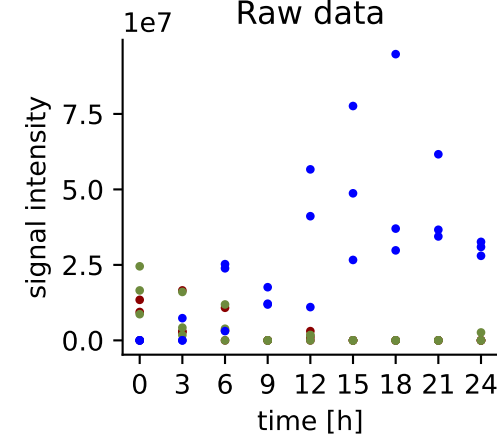

Normalised data

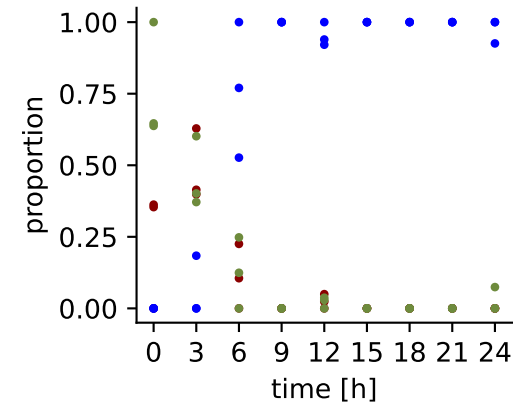

Fit one state

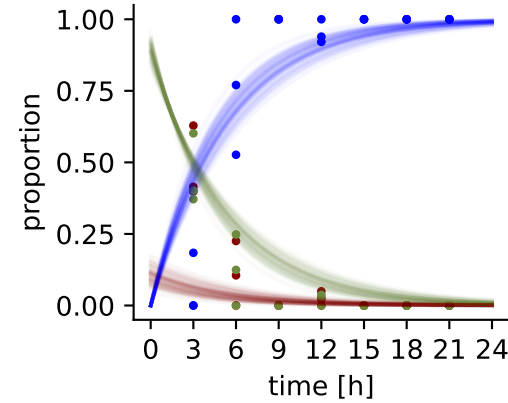

Fit two state

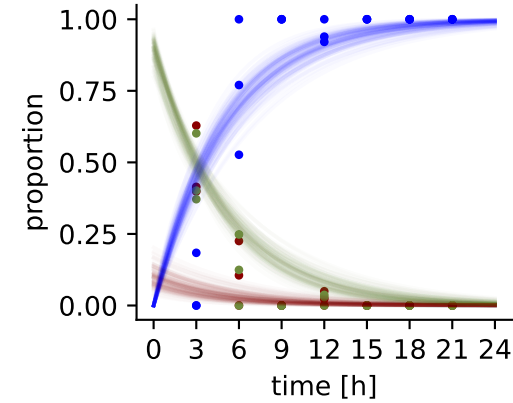

Posterior distribution

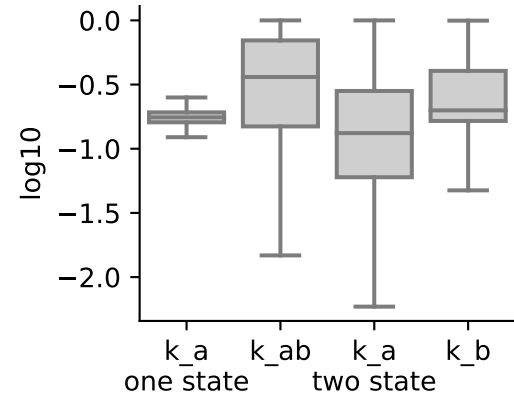

|                          |          |
|--------------------------|----------|
| p value                  | 3.59E-01 |
| log likelihood one state | 27.381   |
| log likelihood two state | 28.406   |
| rmse one state           | 0.697    |
| rmse two state           | 0.66     |
| k_a one state            | 0.176    |
| k_ab                     | 0.362    |
| k_a two state            | 0.132    |
| k_b                      | 0.199    |
| sigma one state          | 0.157    |
| sigma two state          | 0.157    |



LONP1  
LONP1  
P36776  
Lon protease homolog, mitochondrial

Cell lysate

Mitochondria

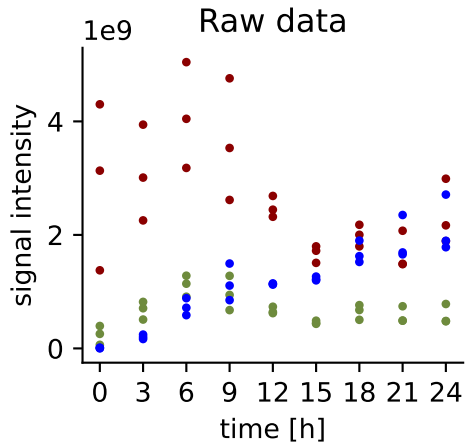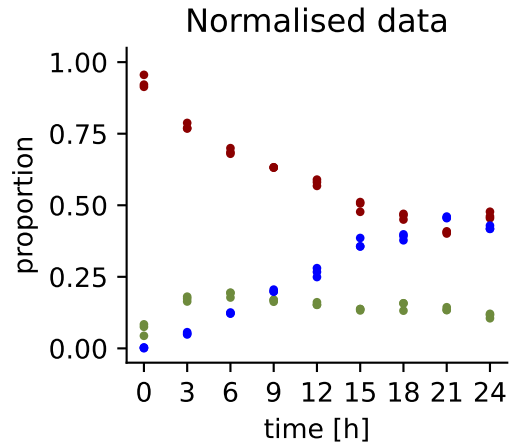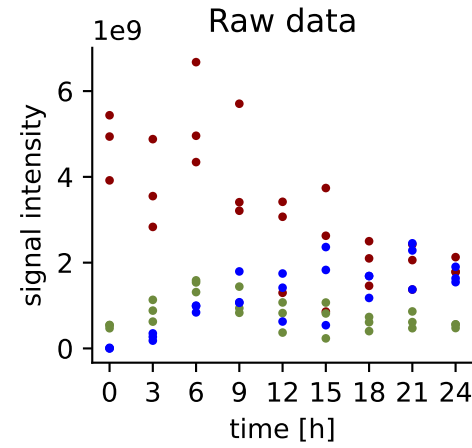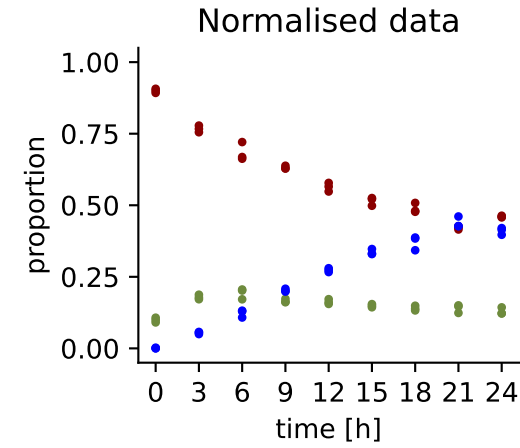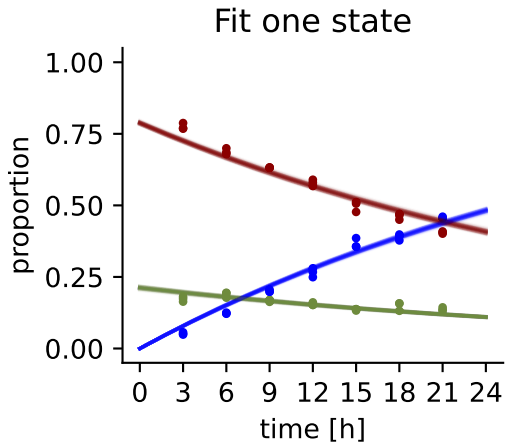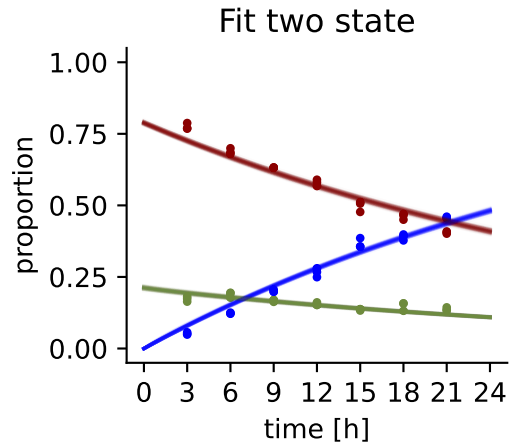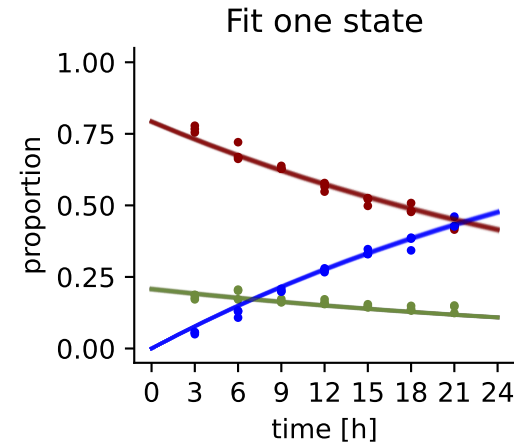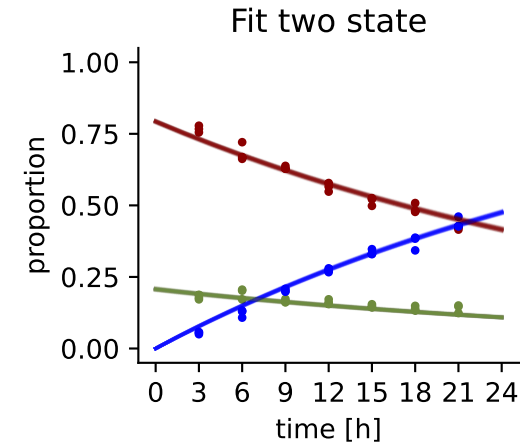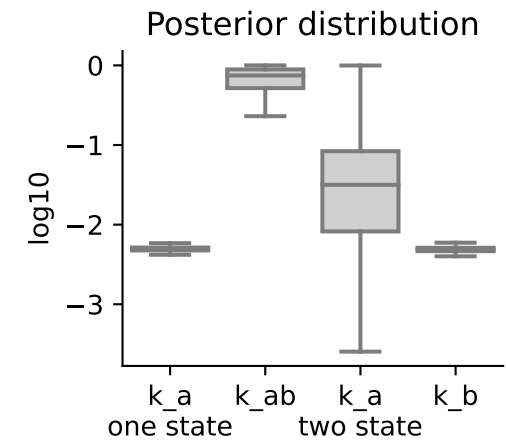

|                          |          |
|--------------------------|----------|
| p value                  | 4.67E-02 |
| log likelihood one state | 147.051  |
| log likelihood two state | 150.115  |
| rmse one state           | 0.304    |
| rmse two state           | 0.307    |
| k_a one state            | 0.005    |
| k_ab                     | 0.747    |
| k_a two state            | 0.032    |
| k_b                      | 0.005    |
| sigma one state          | 0.024    |
| sigma two state          | 0.024    |

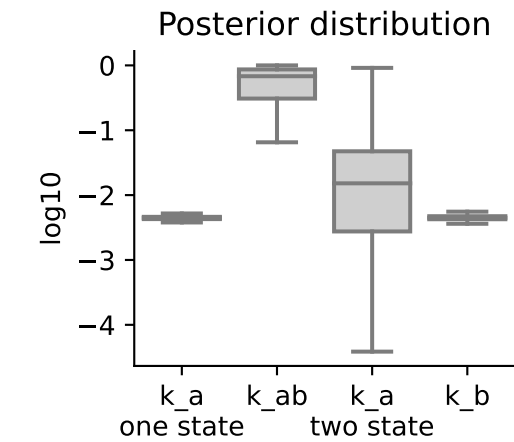

|                          |          |
|--------------------------|----------|
| p value                  | 4.70E-03 |
| log likelihood one state | 157.311  |
| log likelihood two state | 162.67   |
| rmse one state           | 0.291    |
| rmse two state           | 0.293    |
| k_a one state            | 0.004    |
| k_ab                     | 0.681    |
| k_a two state            | 0.015    |
| k_b                      | 0.004    |
| sigma one state          | 0.02     |
| sigma two state          | 0.02     |

C1QBP  
C1QBP  
Q07021

Complement component 1 Q subcomponent-binding protein, mitochondrial

Cell lysate

Mitochondria

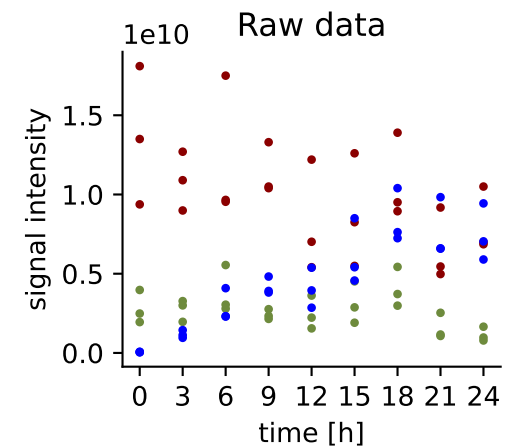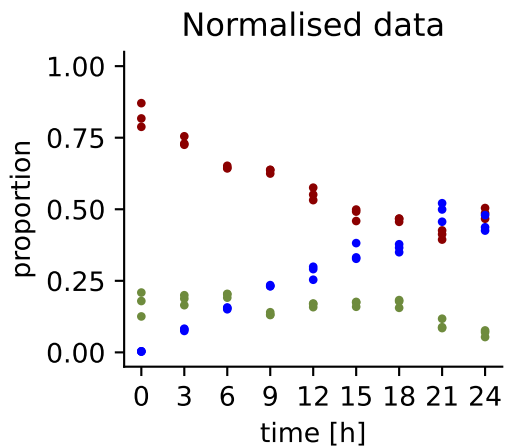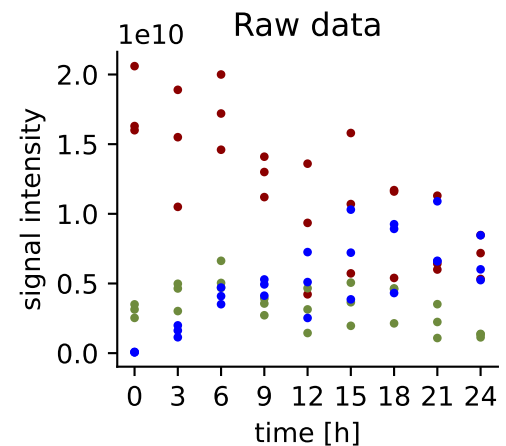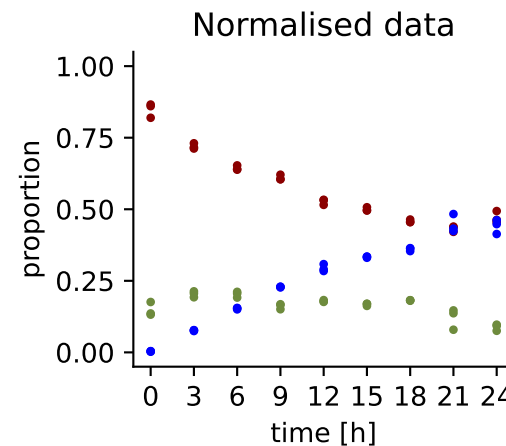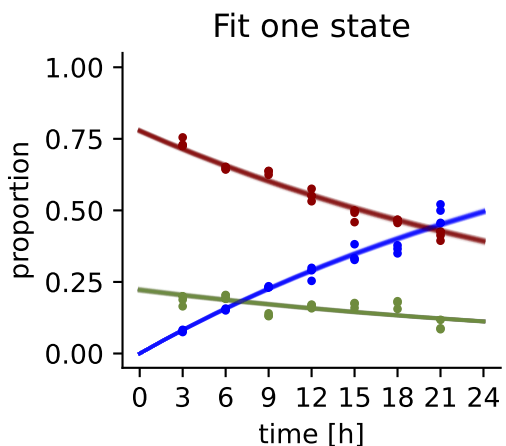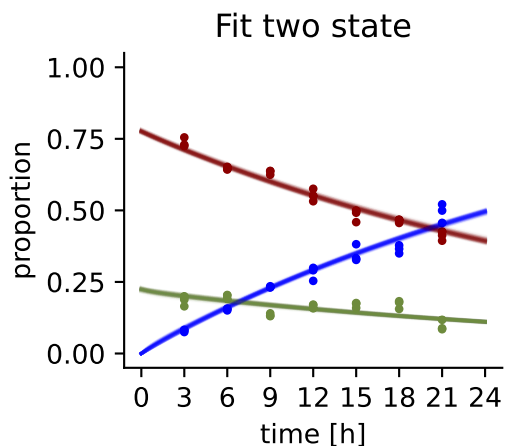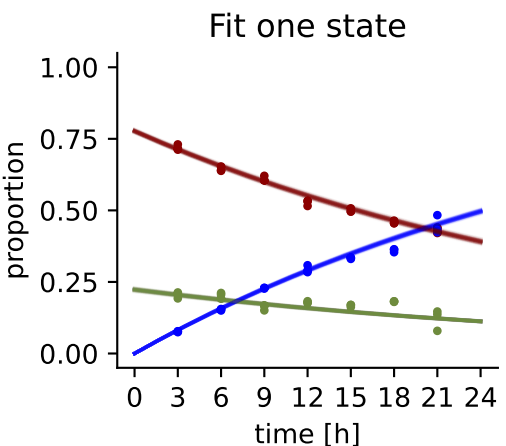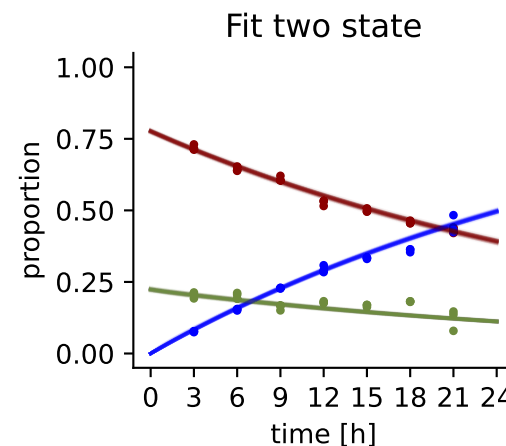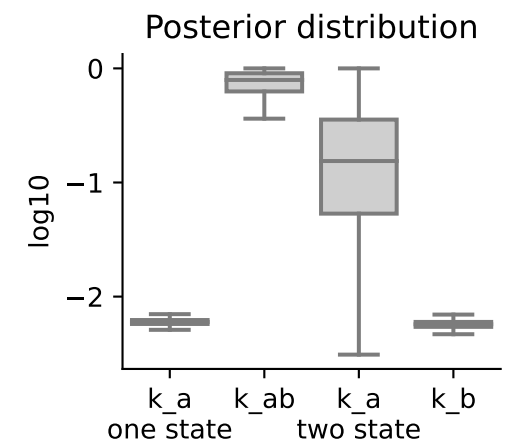

|                          |          |
|--------------------------|----------|
| p value                  | 4.02E-01 |
| log likelihood one state | 140.717  |
| log likelihood two state | 141.627  |
| rmse one state           | 0.306    |
| rmse two state           | 0.31     |
| k_a one state            | 0.006    |
| k_ab                     | 0.792    |
| k_a two state            | 0.154    |
| k_b                      | 0.006    |
| sigma one state          | 0.026    |
| sigma two state          | 0.027    |

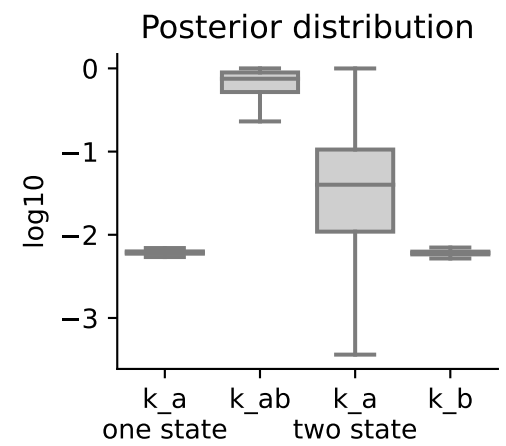

|                          |          |
|--------------------------|----------|
| p value                  | 3.64E-02 |
| log likelihood one state | 155.046  |
| log likelihood two state | 158.36   |
| rmse one state           | 0.292    |
| rmse two state           | 0.295    |
| k_a one state            | 0.006    |
| k_ab                     | 0.751    |
| k_a two state            | 0.04     |
| k_b                      | 0.006    |
| sigma one state          | 0.021    |
| sigma two state          | 0.021    |

CLPP  
CLPP  
Q16740  
ATP-dependent Clp protease proteolytic subunit, mitochondrial

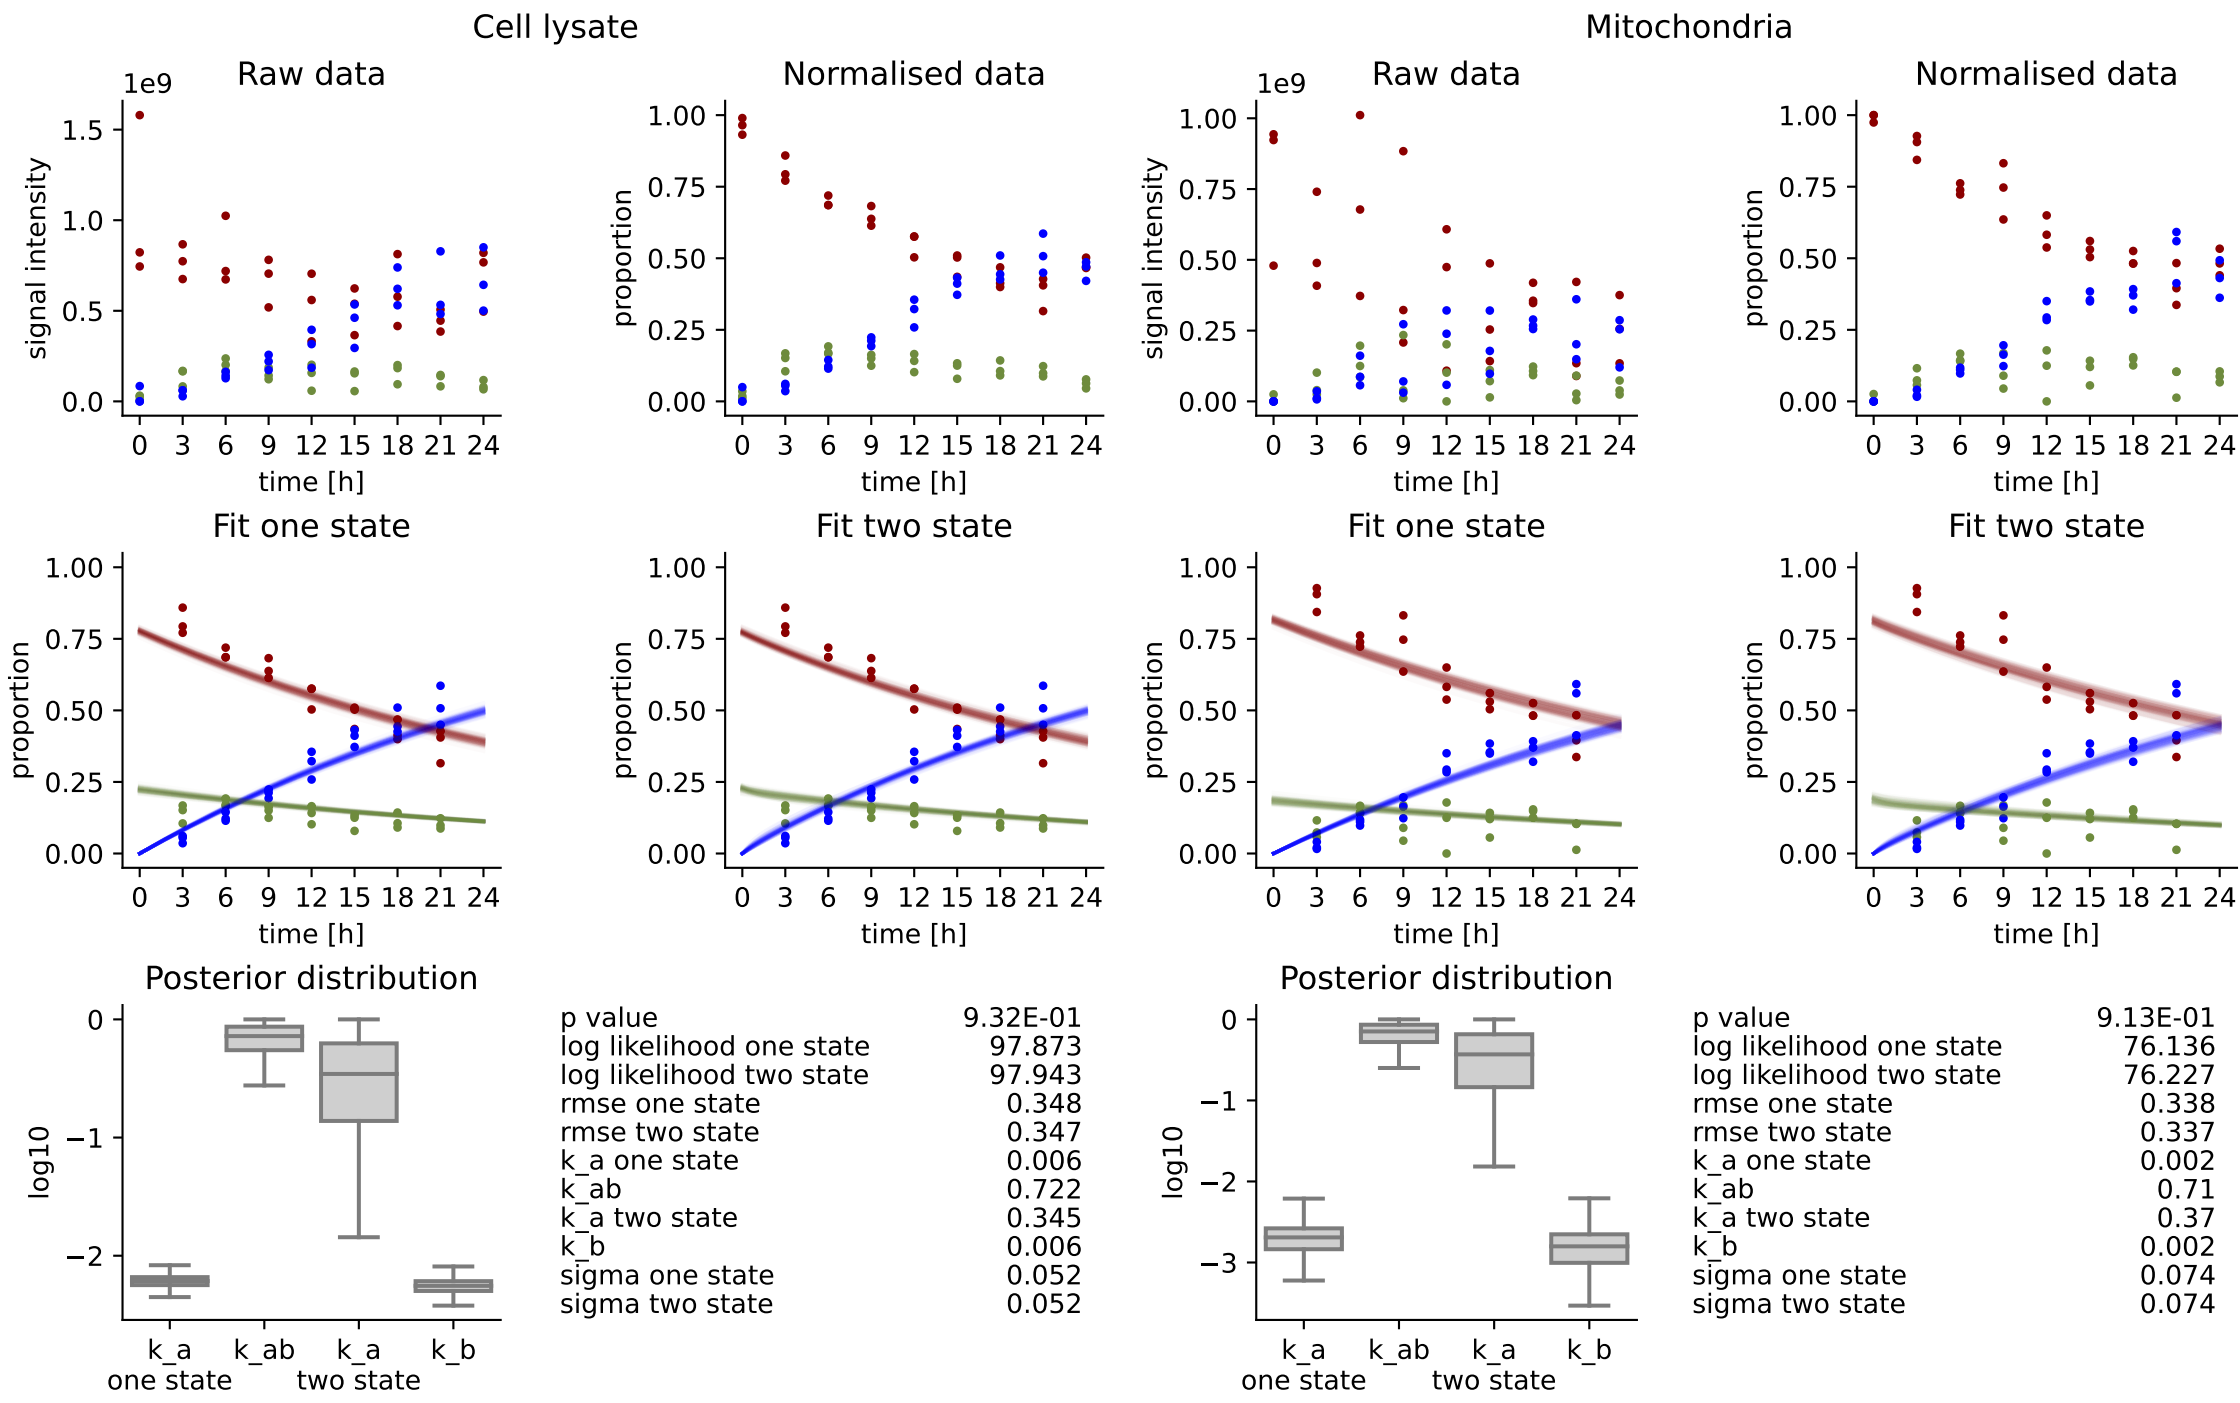

RCC1LV1  
WBSCR16  
Q96I51

Williams-Beuren syndrome chromosomal region 16 protein

Cell lysate

Mitochondria

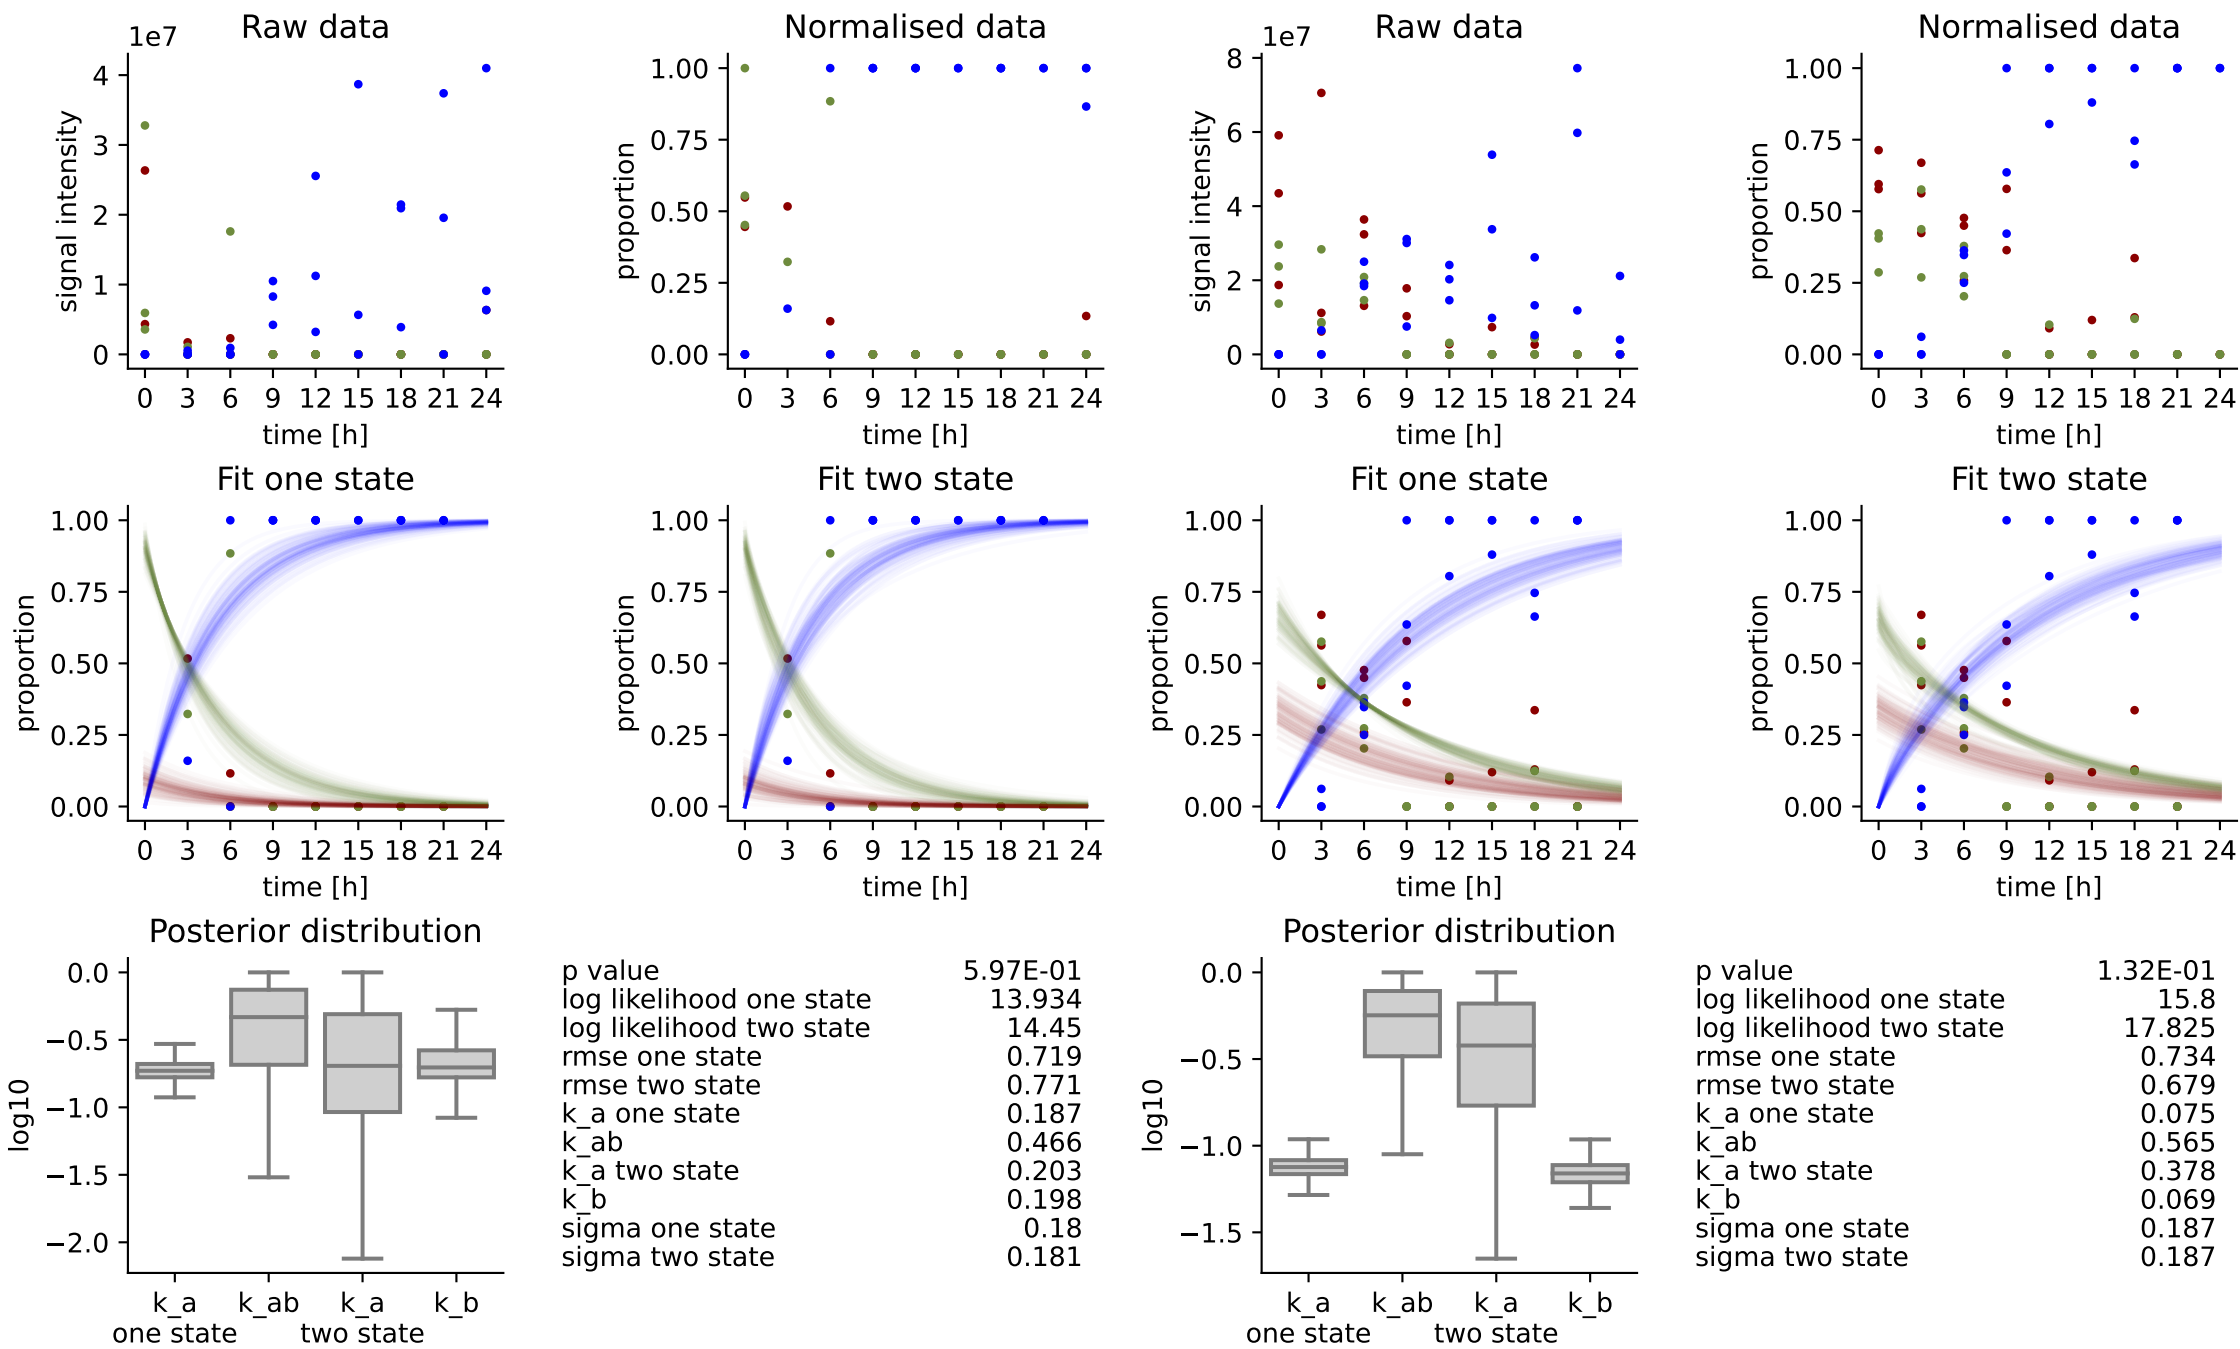

YBEY  
YBEY  
P58557  
Putative ribonuclease

Cell lysate

Mitochondria

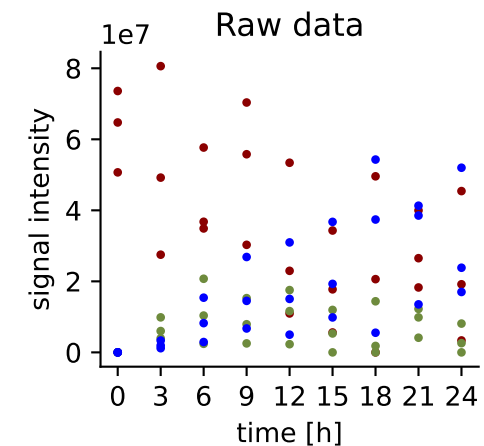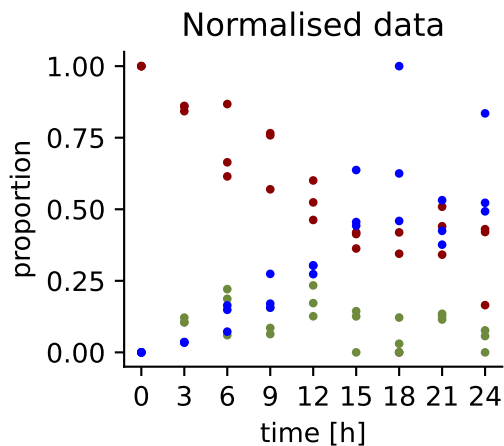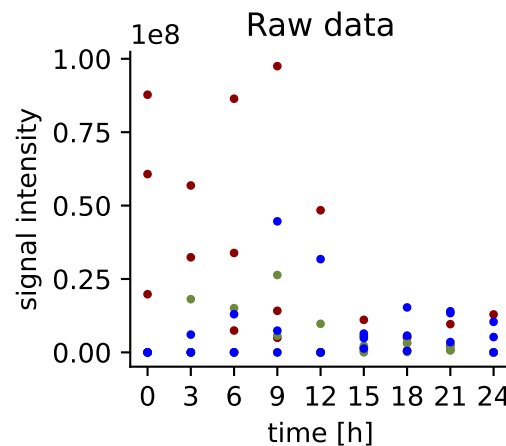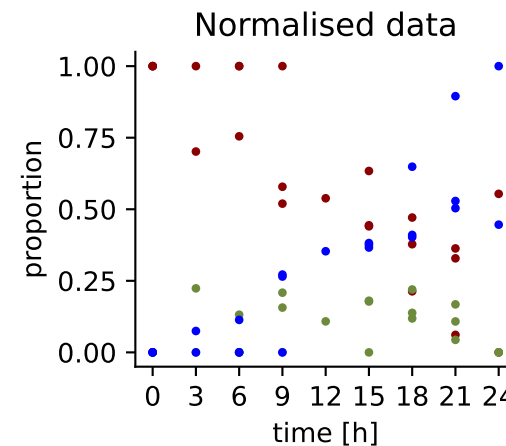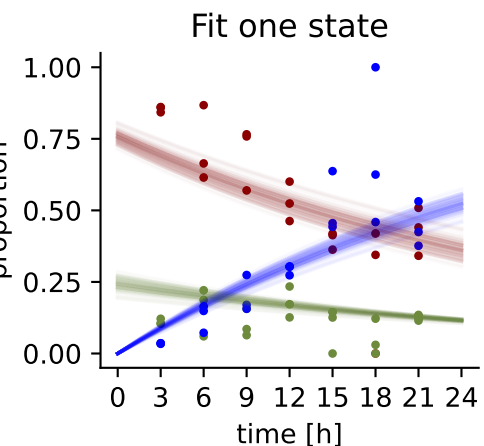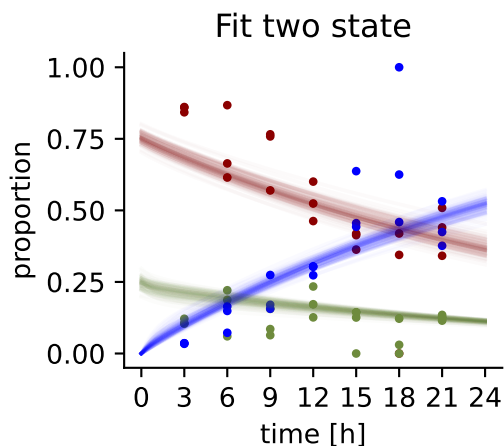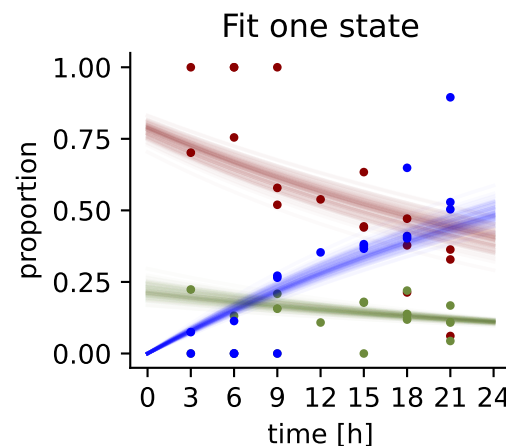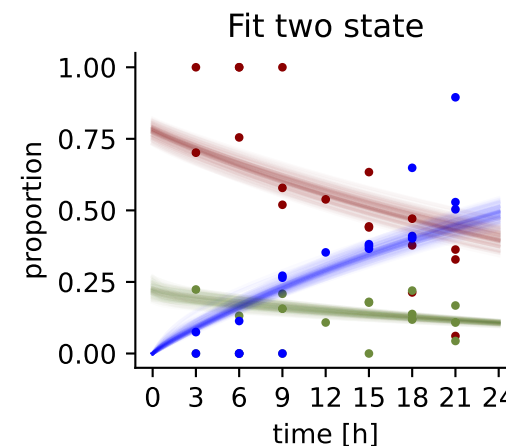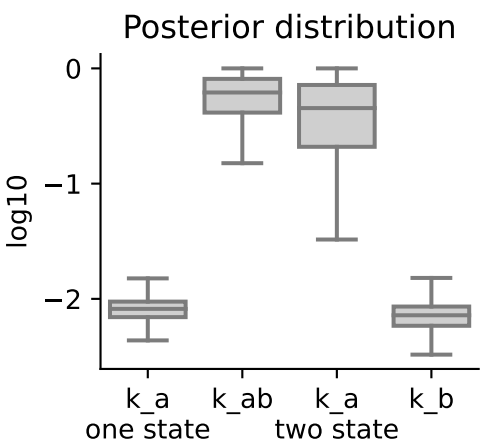

|                          |          |
|--------------------------|----------|
| p value                  | 8.52E-01 |
| log likelihood one state | 37.972   |
| log likelihood two state | 38.132   |
| rmse one state           | 0.442    |
| rmse two state           | 0.436    |
| k_a one state            | 0.008    |
| k_ab                     | 0.618    |
| k_a two state            | 0.452    |
| k_b                      | 0.007    |
| sigma one state          | 0.133    |
| sigma two state          | 0.133    |

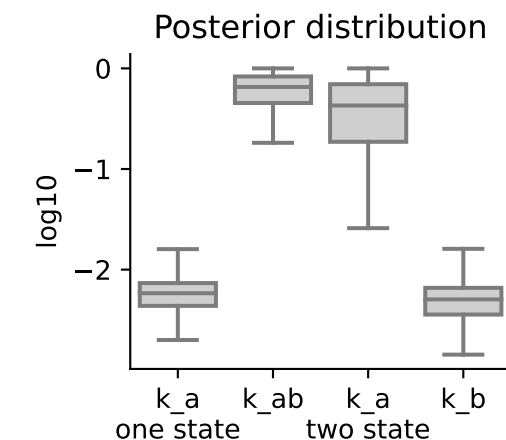

|                          |          |
|--------------------------|----------|
| p value                  | 9.67E-01 |
| log likelihood one state | 23.704   |
| log likelihood two state | 23.738   |
| rmse one state           | 0.47     |
| rmse two state           | 0.471    |
| k_a one state            | 0.006    |
| k_ab                     | 0.654    |
| k_a two state            | 0.427    |
| k_b                      | 0.005    |
| sigma one state          | 0.156    |
| sigma two state          | 0.157    |

GTPBP8  
GTPBP8  
Q8N3Z3  
GTP-binding protein 8

Cell lysate

Mitochondria

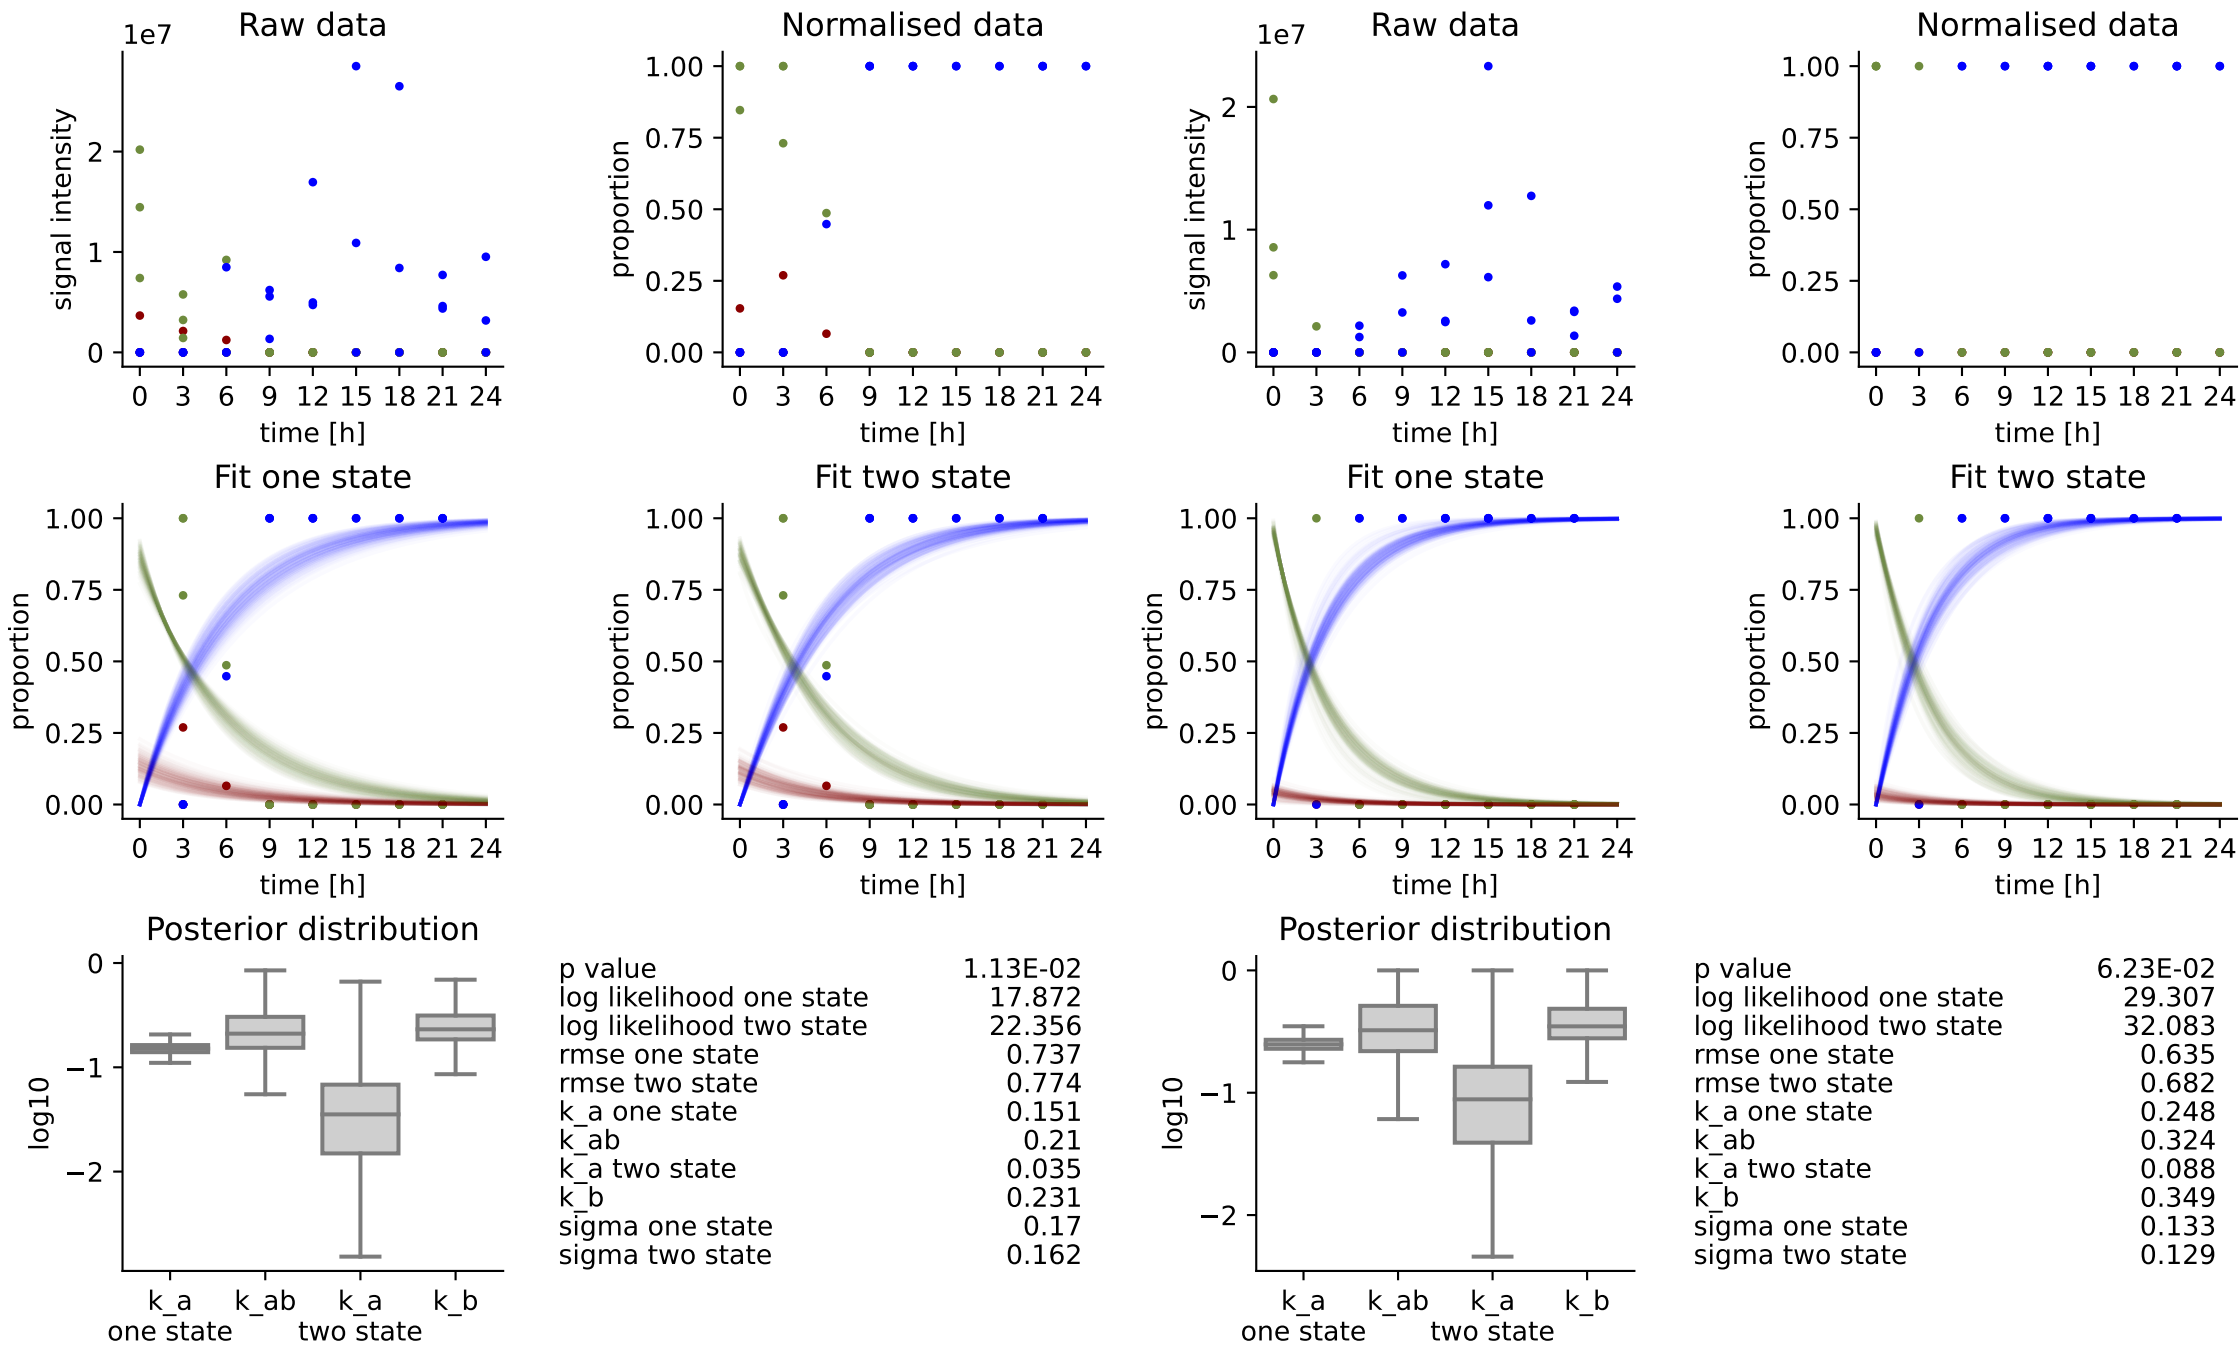

Supplement: 41594_2024_1356_MOESM4_ESM.pdf [file 41594_2024_1356_MOESM4_ESM.pdf]
