# Supplementary material for: A roadmap for ribosome assembly in human mitochondria
Source: PubMed Central journal article supplement (PMC11638073; doi:10.1038/s41594-024-01356-w), 2024-07-11

**mS23 fraction 1**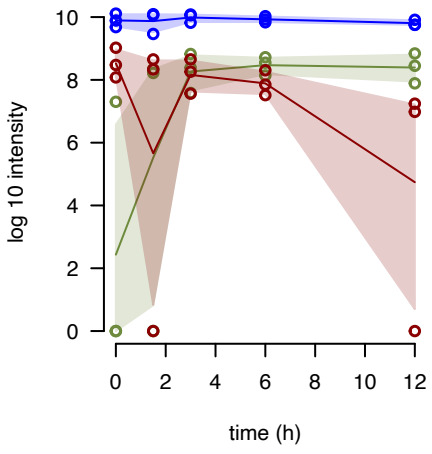**mS23 fraction 2**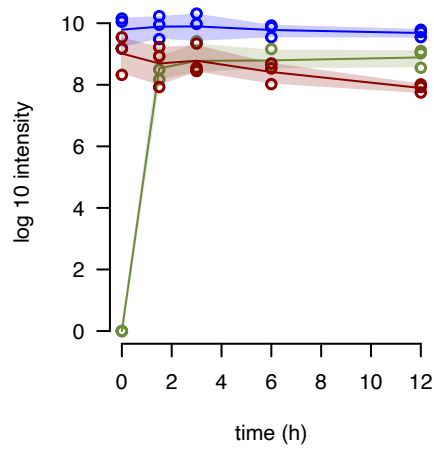**mS23 fraction 3**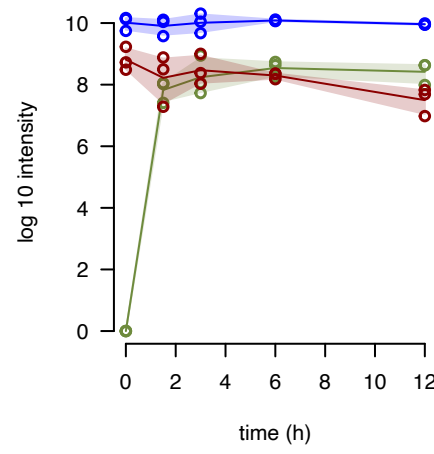**mS23 fraction 4**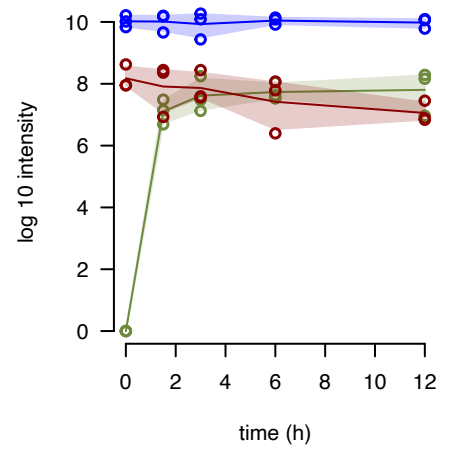**mS23 fraction 5**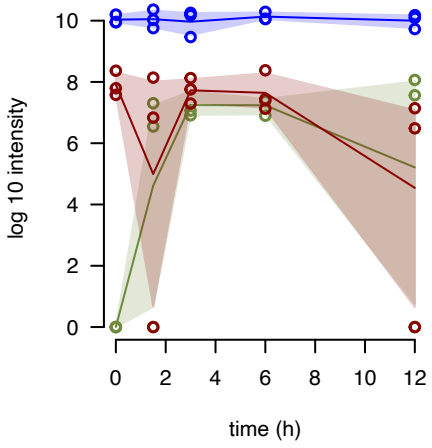**mS23 fraction 6**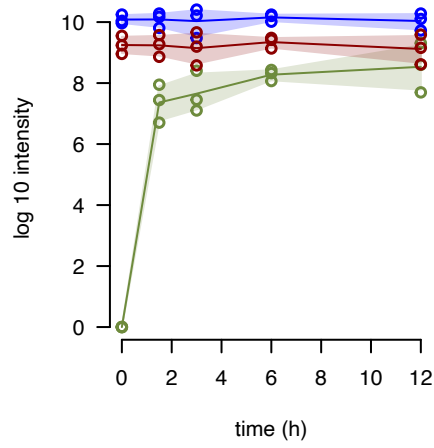**mS23 fraction 7**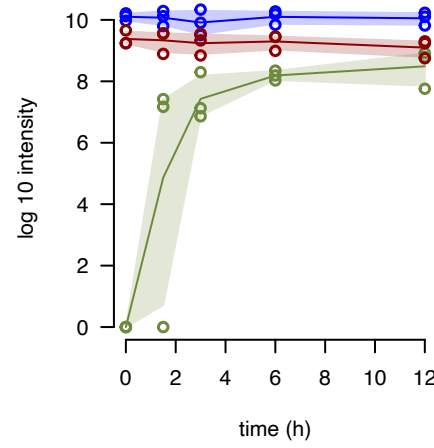**mS23 fraction 8**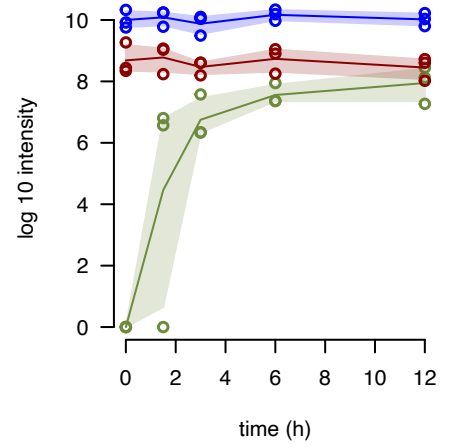**mS23 fraction 9**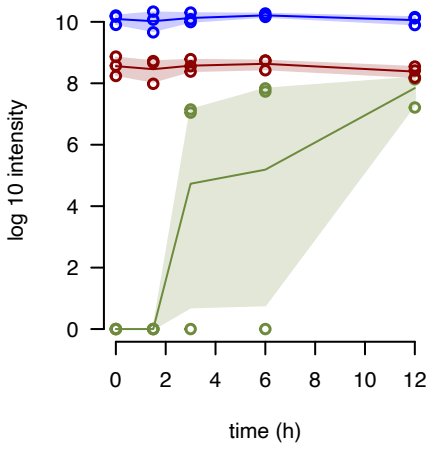**mS23 fraction 10**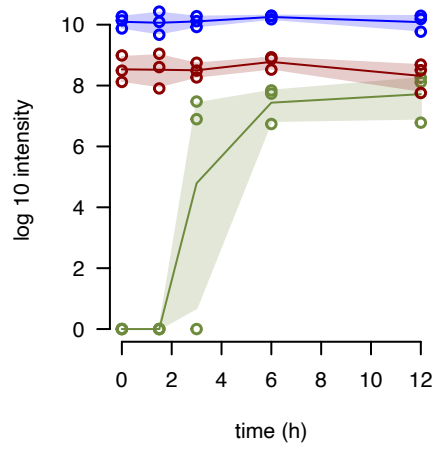**mS23 fraction 11**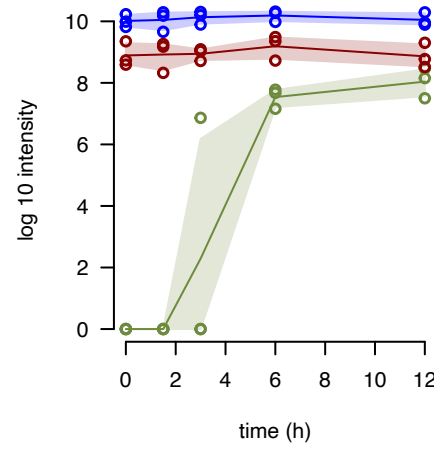**mS23 fraction 12**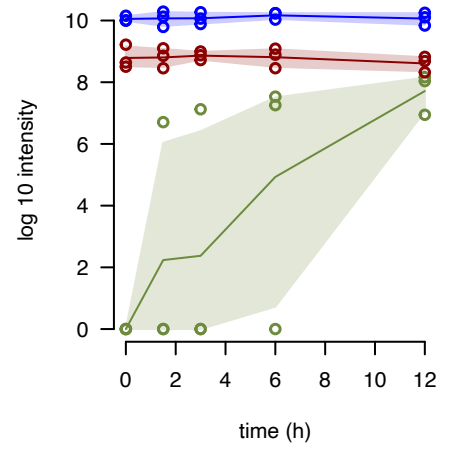**mS23 fraction 13**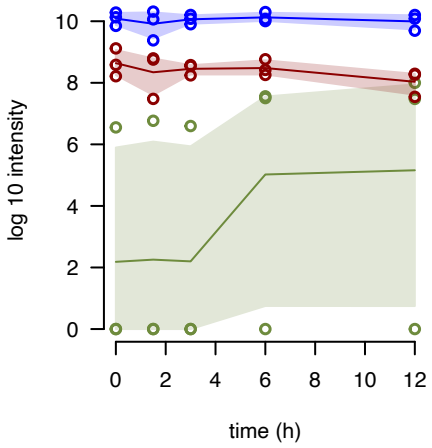**mS23 fraction 14**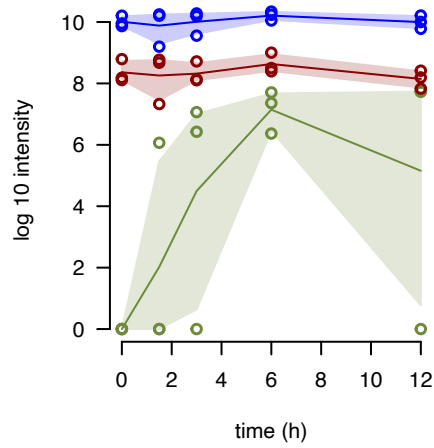**mS23 fraction 15**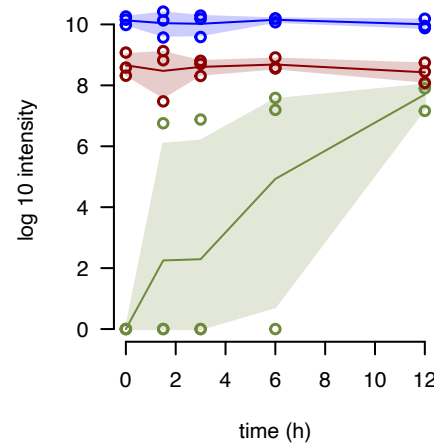**mS23 fraction 16**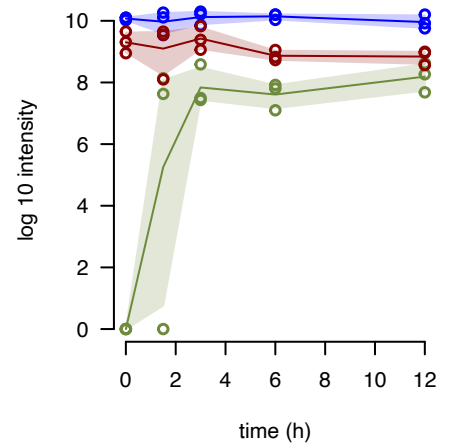



















**mS37 fraction 1**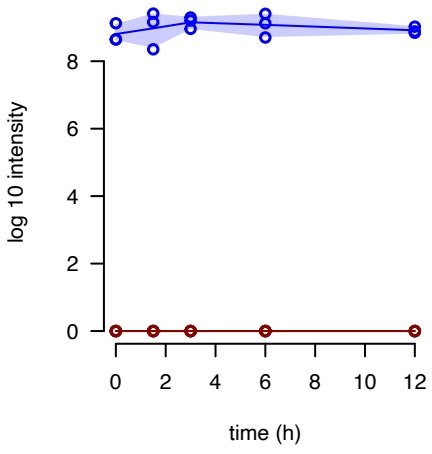**mS37 fraction 2**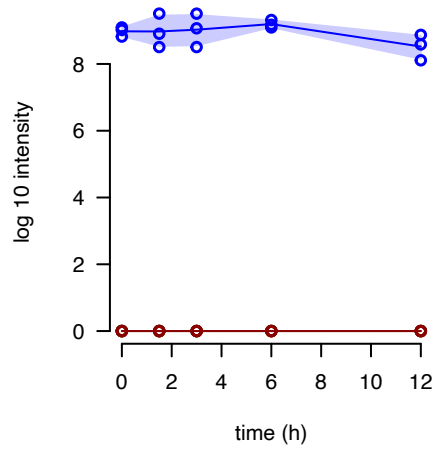**mS37 fraction 3**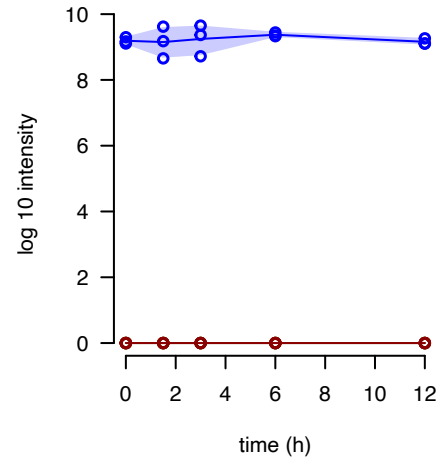**mS37 fraction 4**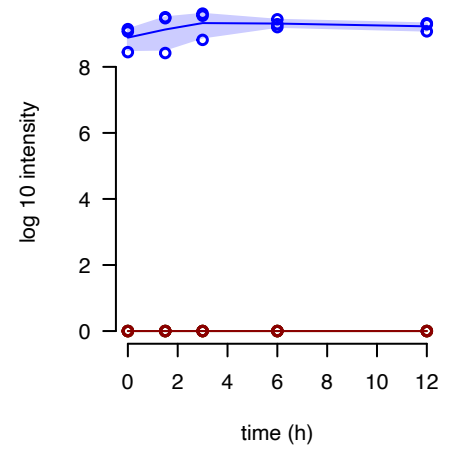**mS37 fraction 5**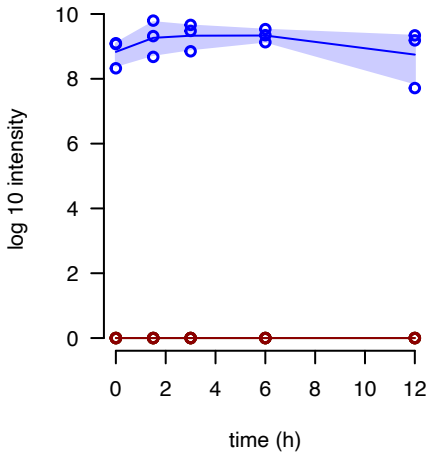**mS37 fraction 6**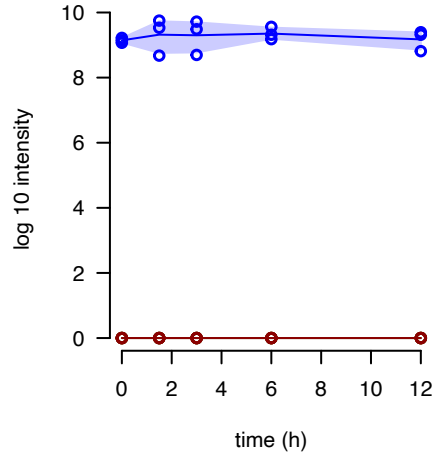**mS37 fraction 7**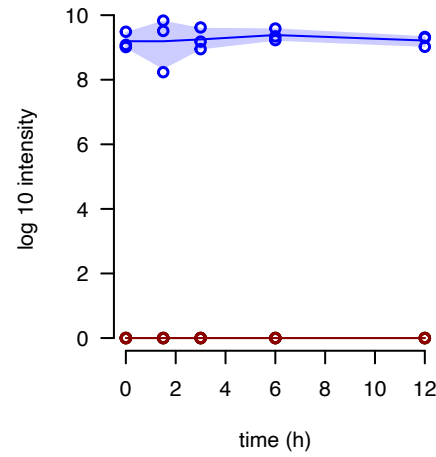**mS37 fraction 8**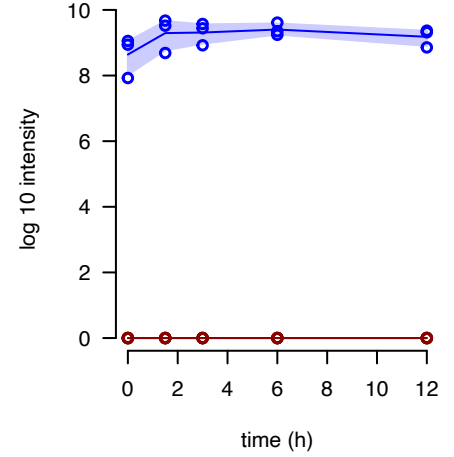**mS37 fraction 9**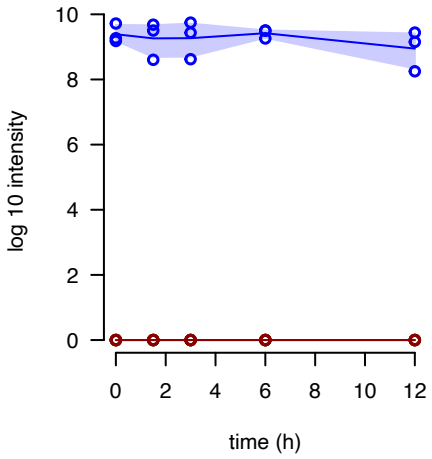**mS37 fraction 10**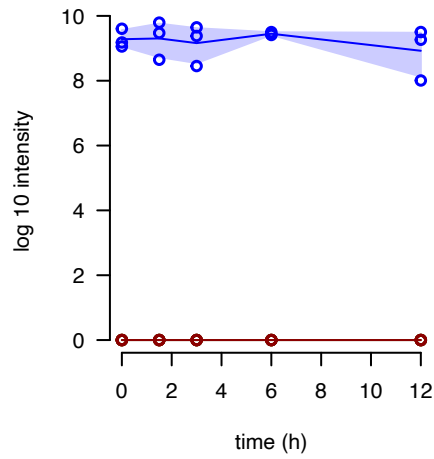**mS37 fraction 11**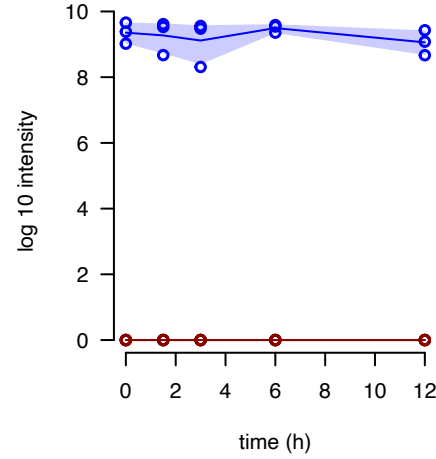**mS37 fraction 12**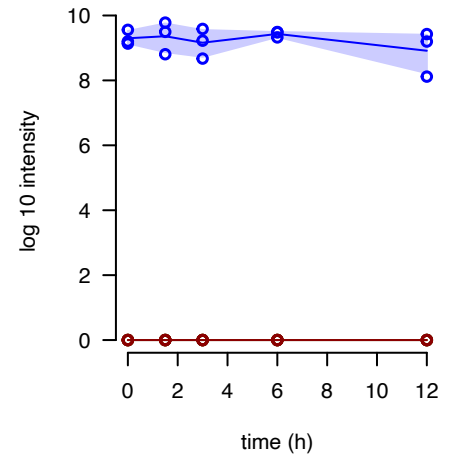**mS37 fraction 13**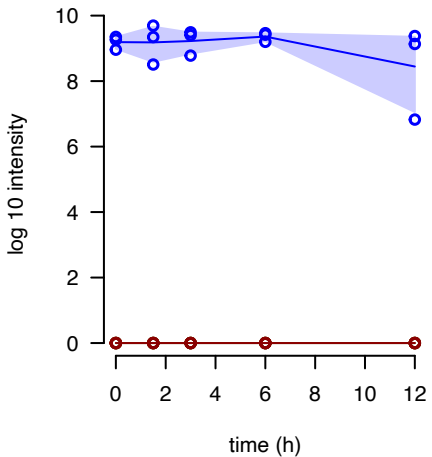**mS37 fraction 14**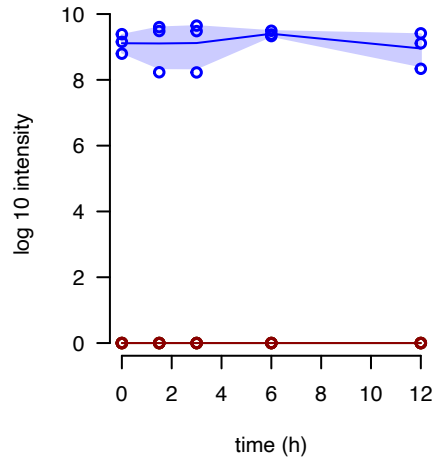**mS37 fraction 15**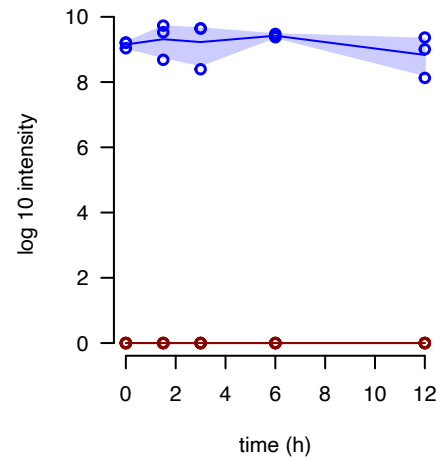**mS37 fraction 16**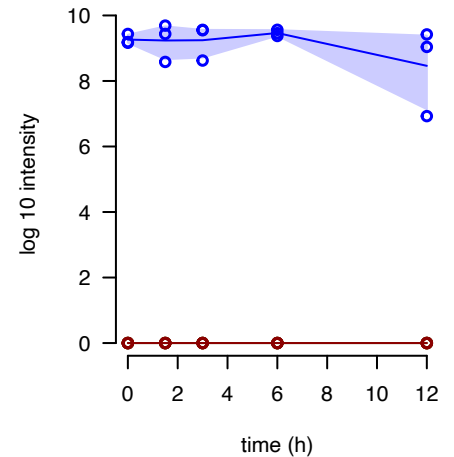

**mS38 fraction 1**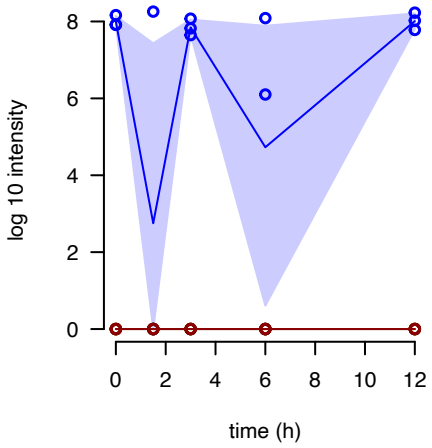**mS38 fraction 2**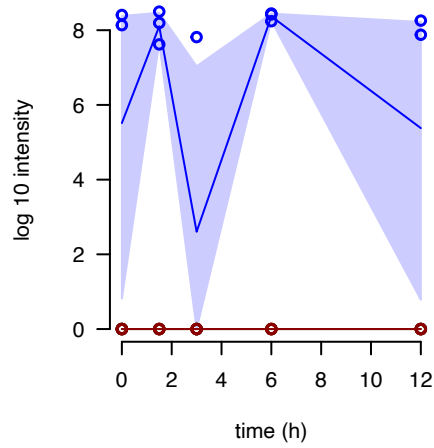**mS38 fraction 3**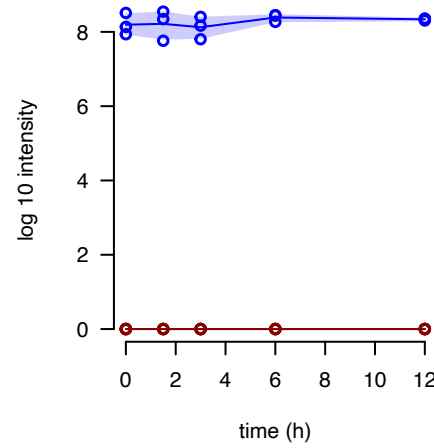**mS38 fraction 4**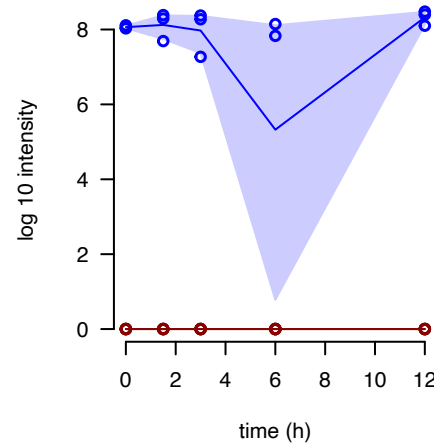**mS38 fraction 5**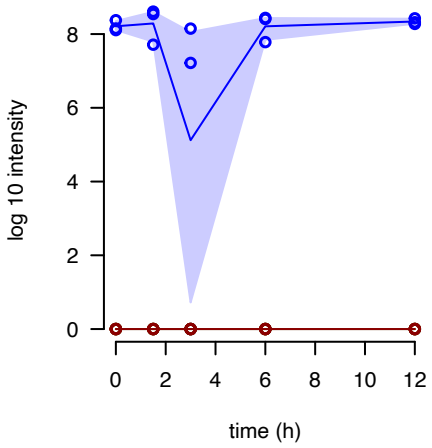**mS38 fraction 6**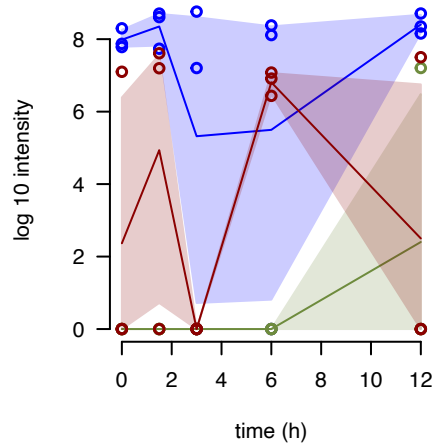**mS38 fraction 7**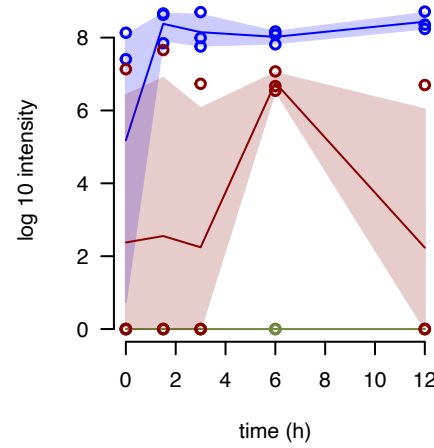**mS38 fraction 8**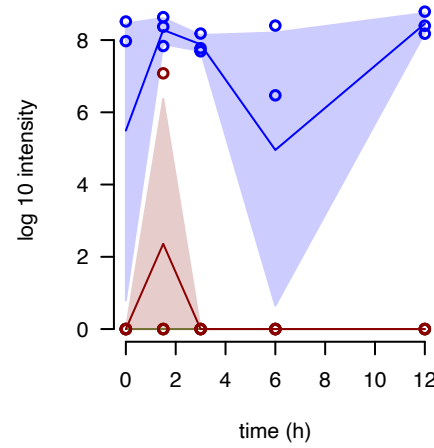**mS38 fraction 9**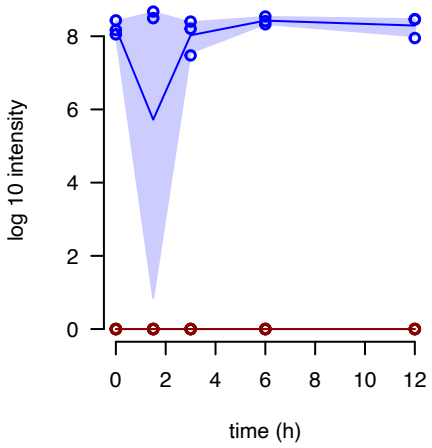**mS38 fraction 10**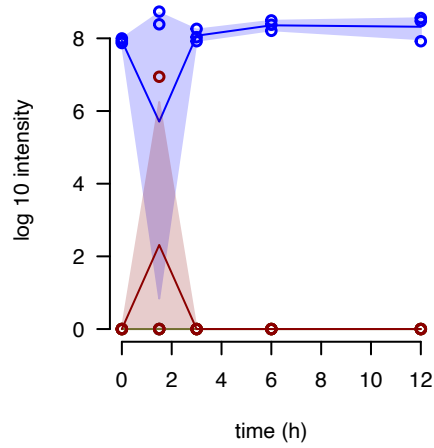**mS38 fraction 11**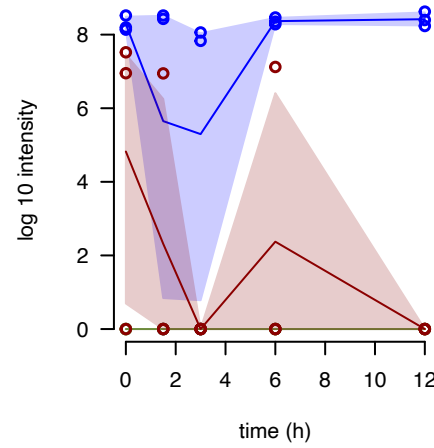**mS38 fraction 12**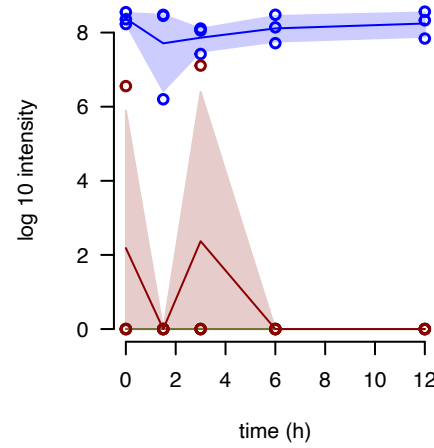**mS38 fraction 13**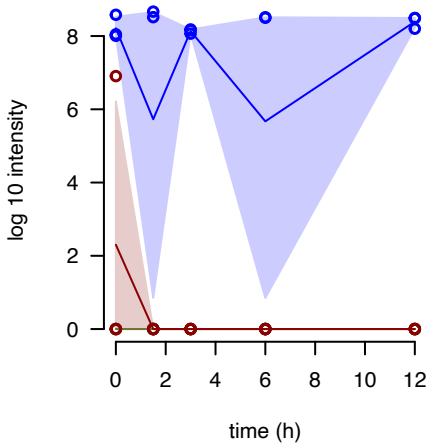**mS38 fraction 14**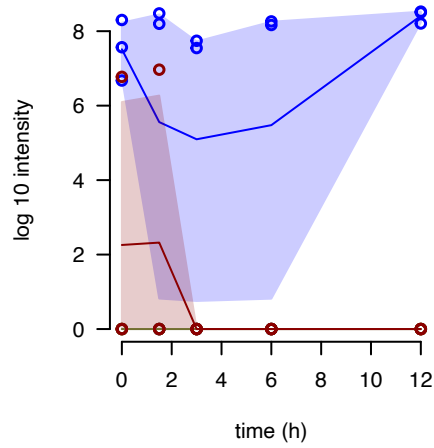**mS38 fraction 15**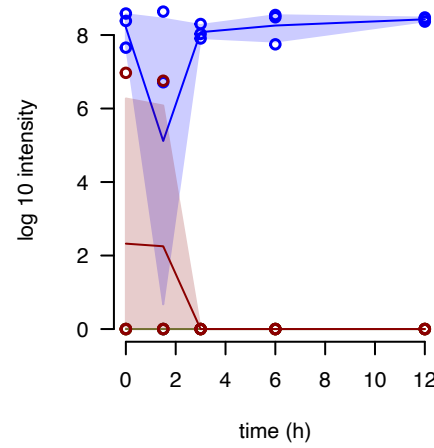**mS38 fraction 16**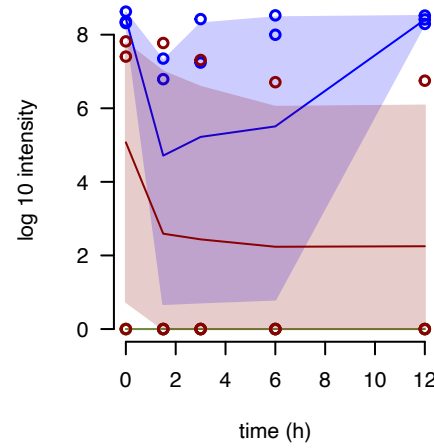

Supplement: 41594_2024_1356_MOESM5_ESM.pdf [file 41594_2024_1356_MOESM5_ESM.pdf]
