# Supplementary material for: A roadmap for ribosome assembly in human mitochondria
Source: PubMed Central journal article supplement (PMC11638073; doi:10.1038/s41594-024-01356-w), 2024-07-11

**uL1m fraction 1**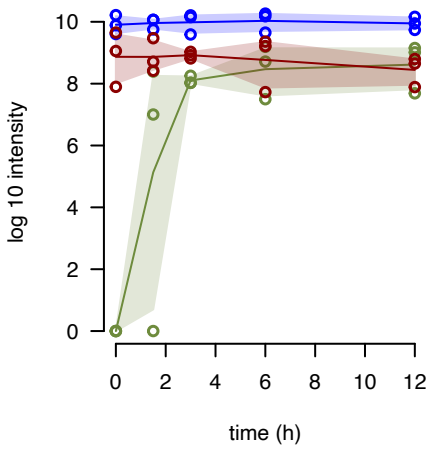**uL1m fraction 2**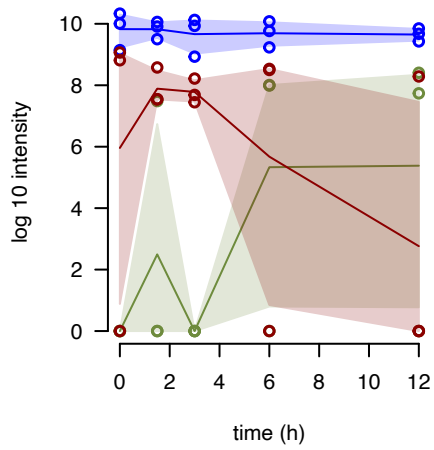**uL1m fraction 3**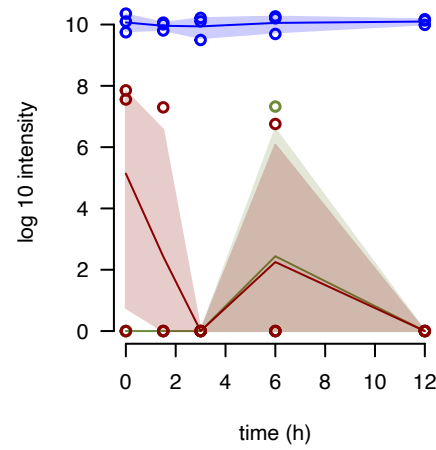**uL1m fraction 4**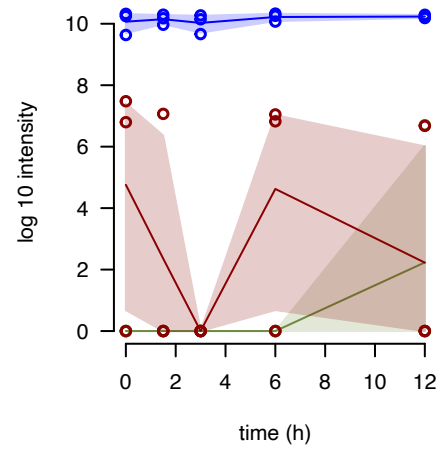**uL1m fraction 5**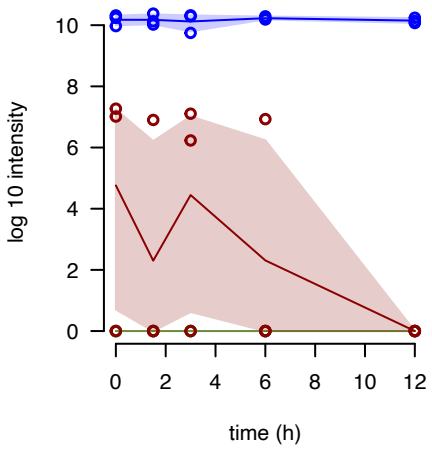**uL1m fraction 6**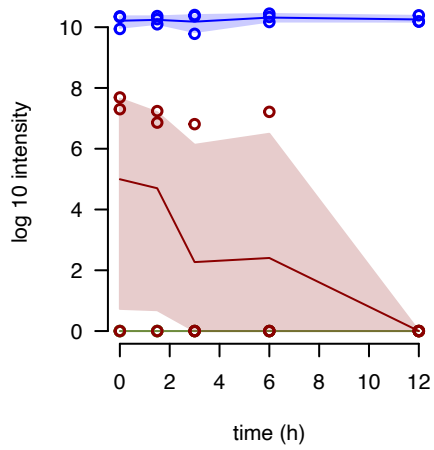**uL1m fraction 7**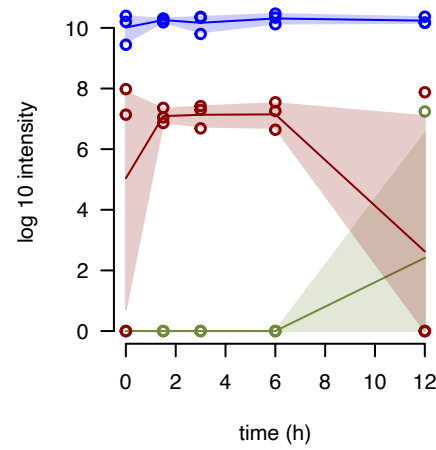**uL1m fraction 8**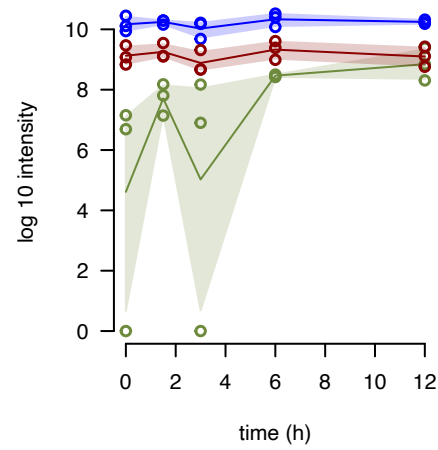**uL1m fraction 9**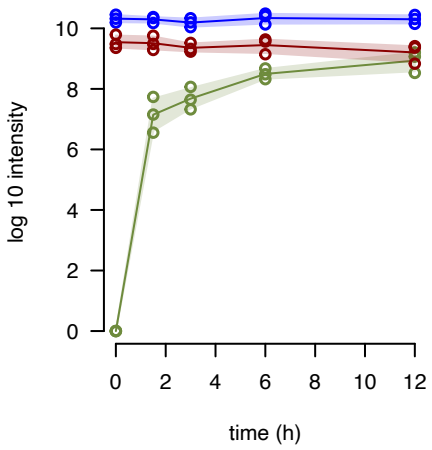**uL1m fraction 10**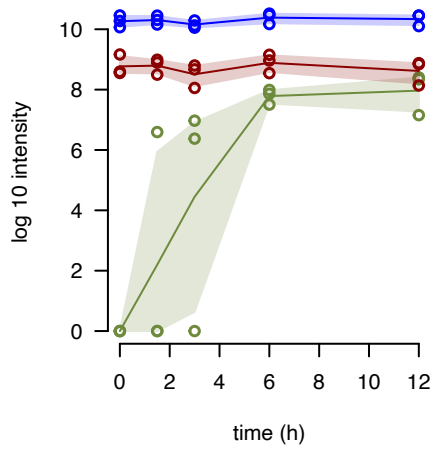**uL1m fraction 11**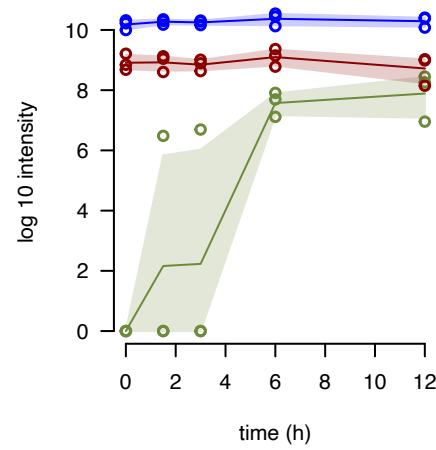**uL1m fraction 12**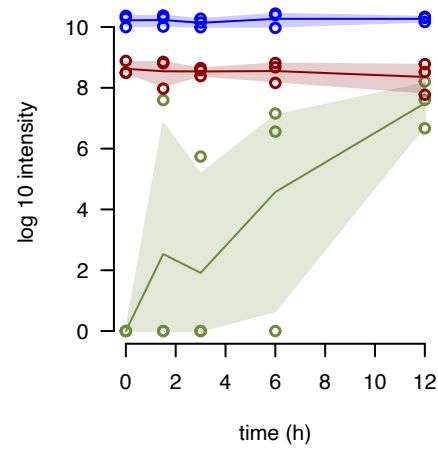**uL1m fraction 13**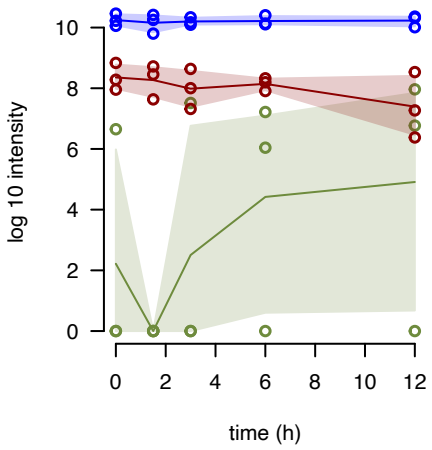**uL1m fraction 14**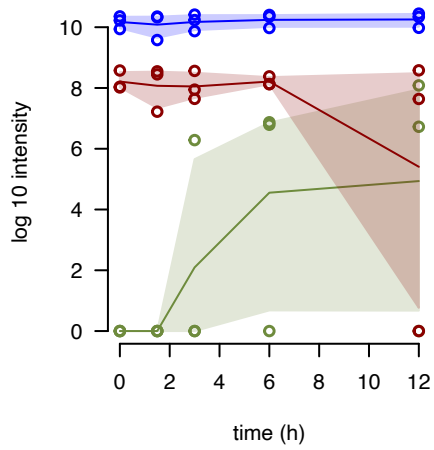**uL1m fraction 15**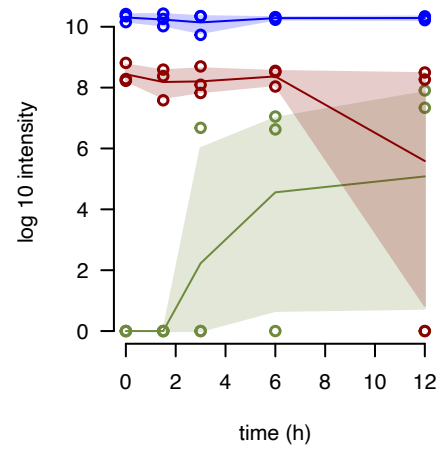**uL1m fraction 16**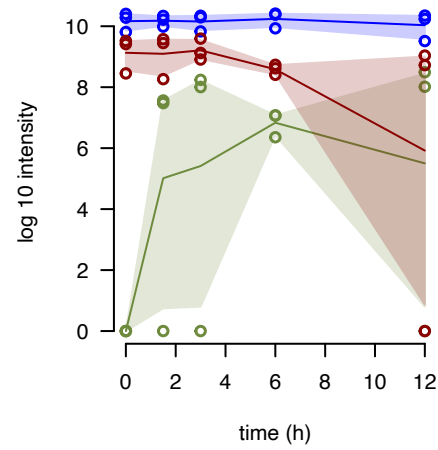

**uL2m fraction 1**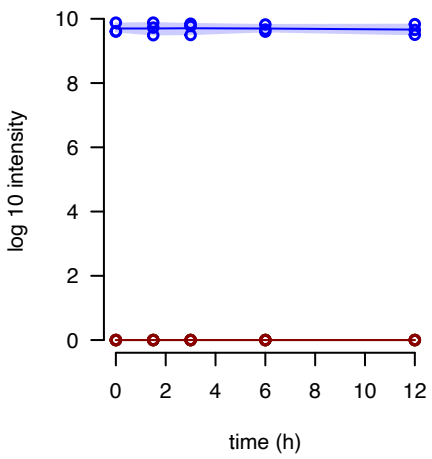**uL2m fraction 2**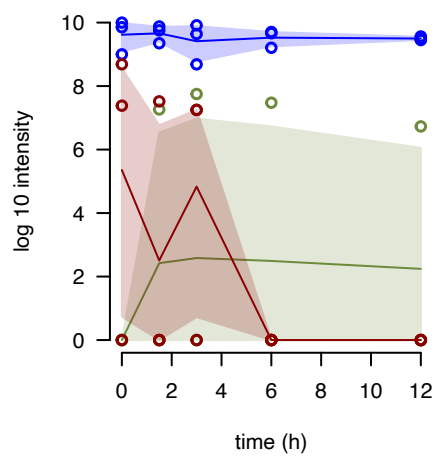**uL2m fraction 3**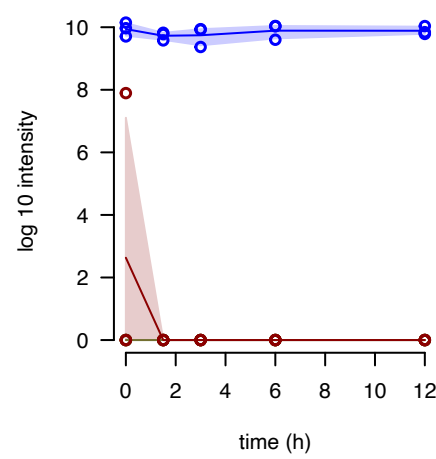**uL2m fraction 4**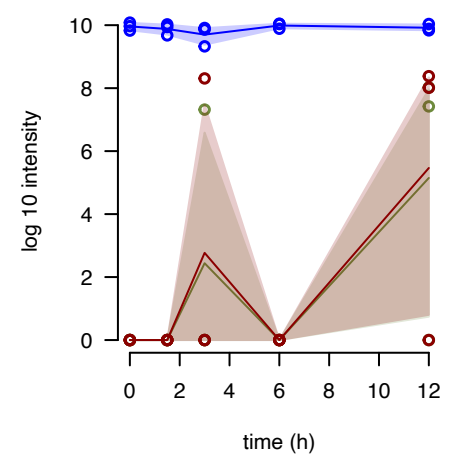**uL2m fraction 5**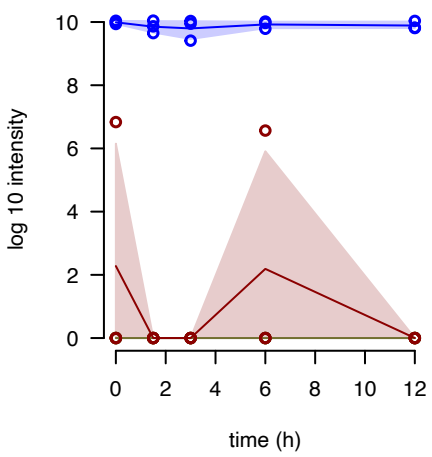**uL2m fraction 6**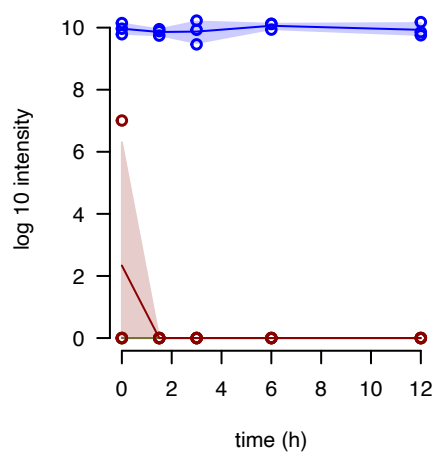**uL2m fraction 7**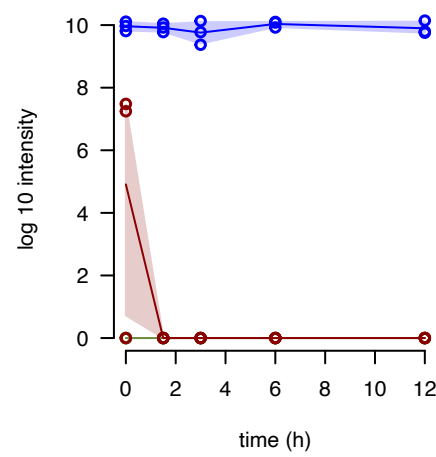**uL2m fraction 8**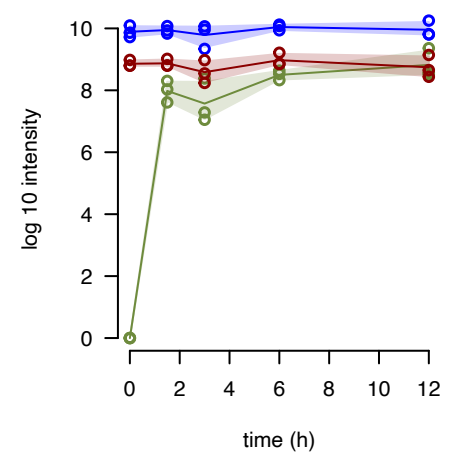**uL2m fraction 9**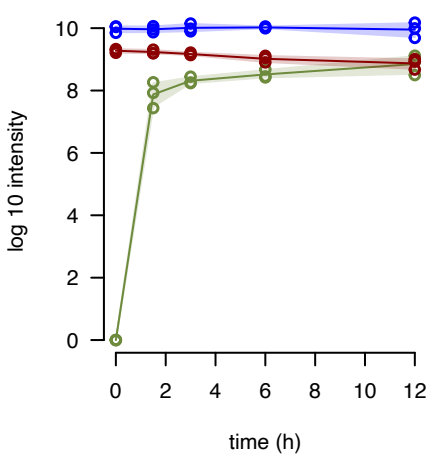**uL2m fraction 10**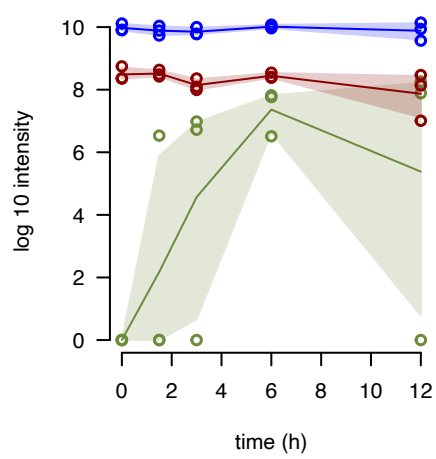**uL2m fraction 11**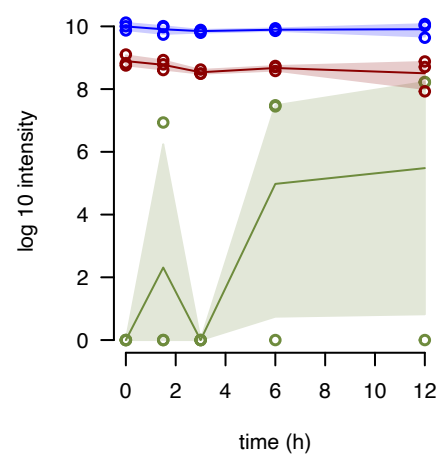**uL2m fraction 12**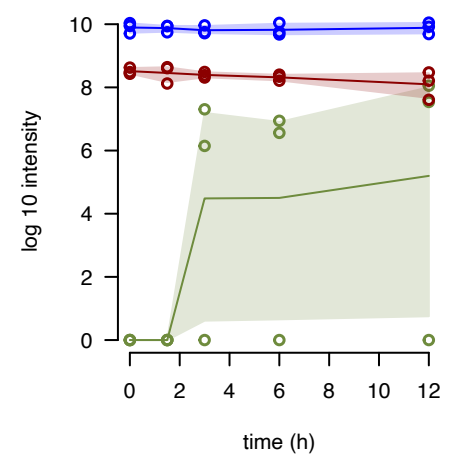**uL2m fraction 13**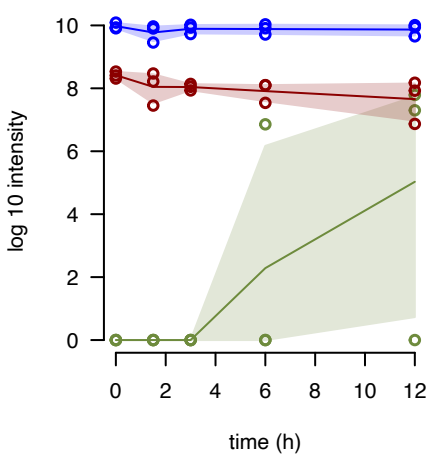**uL2m fraction 14**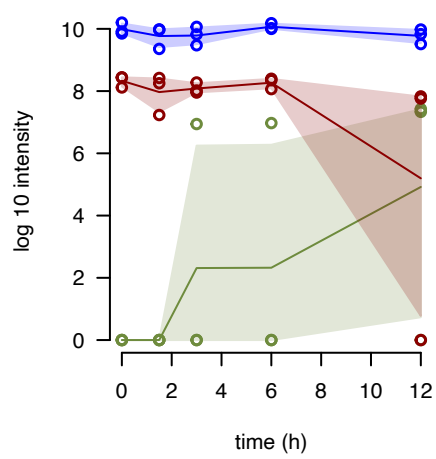**uL2m fraction 15**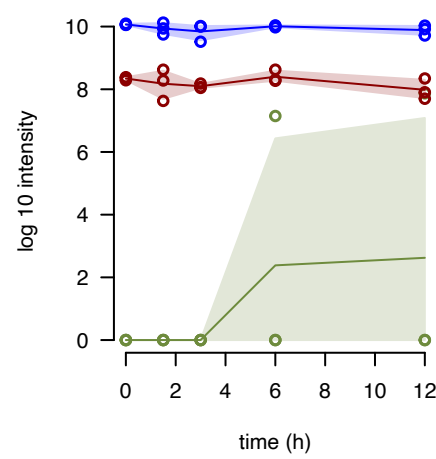**uL2m fraction 16**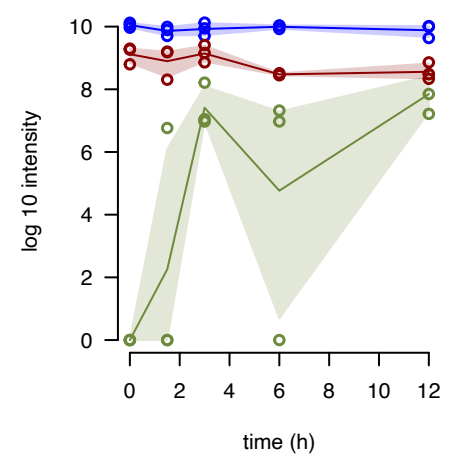



**uL4m fraction 1**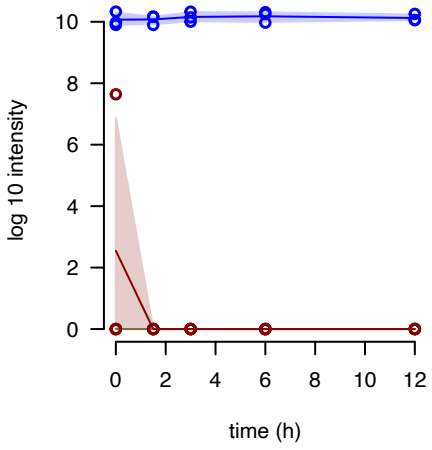**uL4m fraction 2**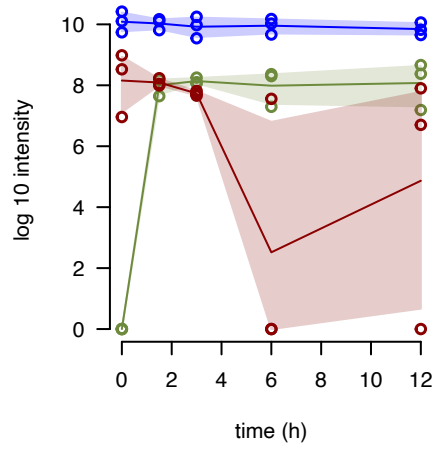**uL4m fraction 3**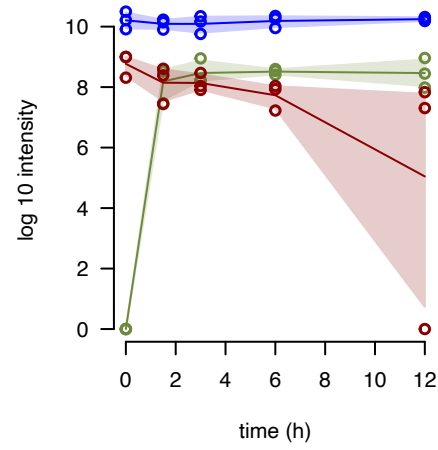**uL4m fraction 4**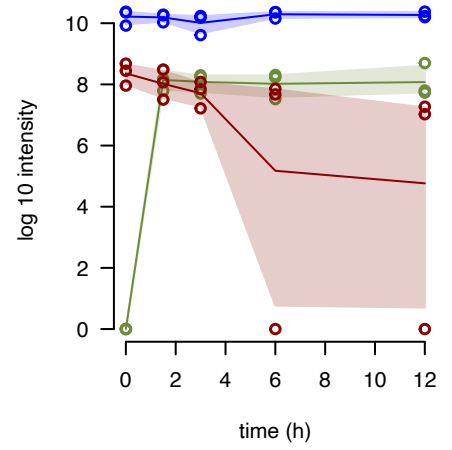**uL4m fraction 5**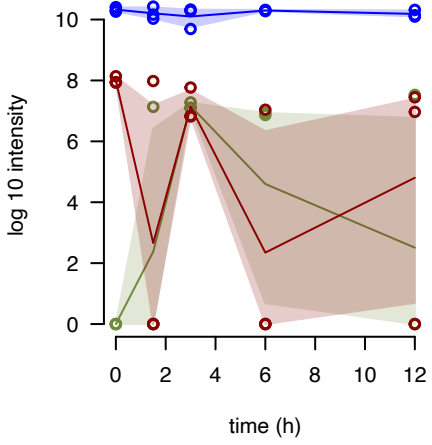**uL4m fraction 6**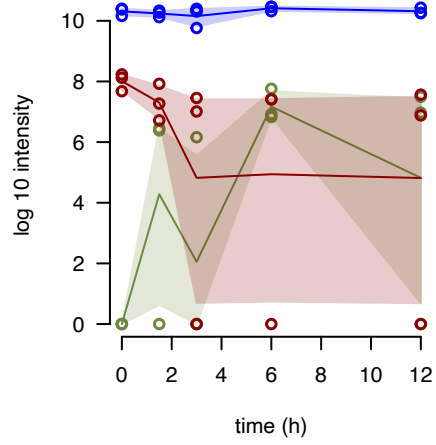**uL4m fraction 7**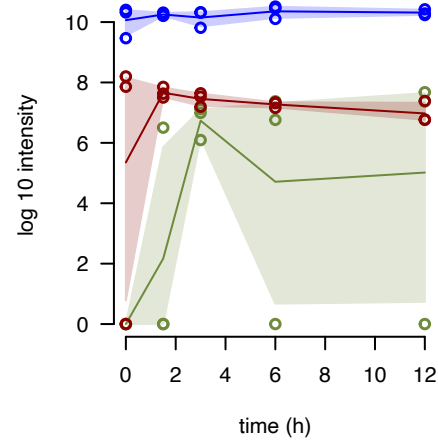**uL4m fraction 8**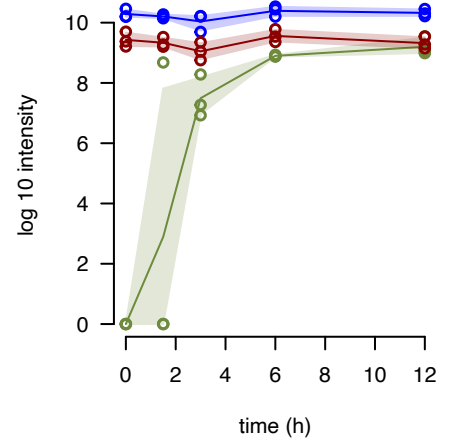**uL4m fraction 9**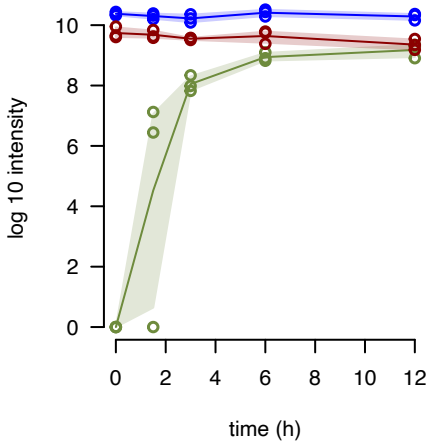**uL4m fraction 10**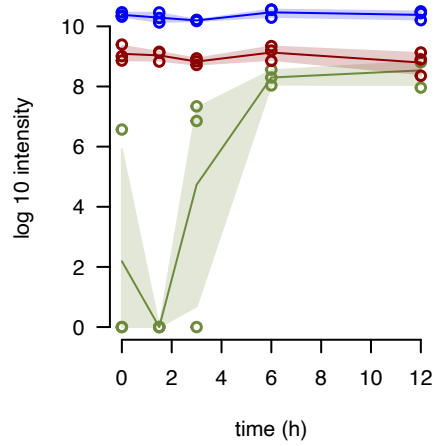**uL4m fraction 11**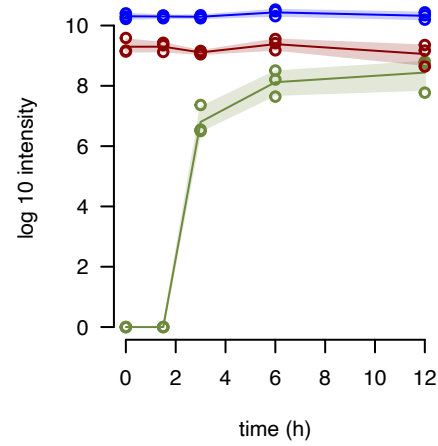**uL4m fraction 12**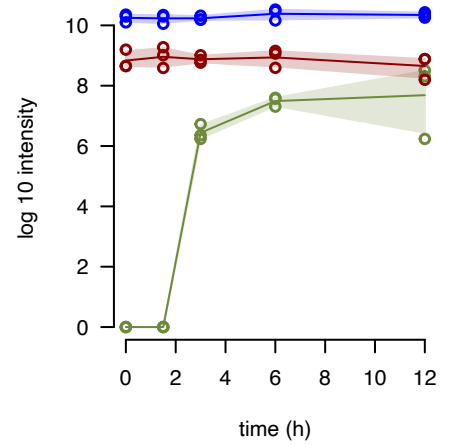**uL4m fraction 13**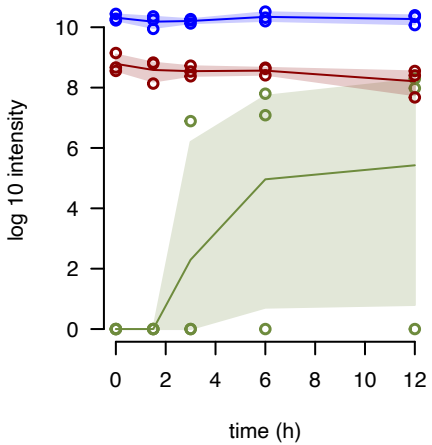**uL4m fraction 14**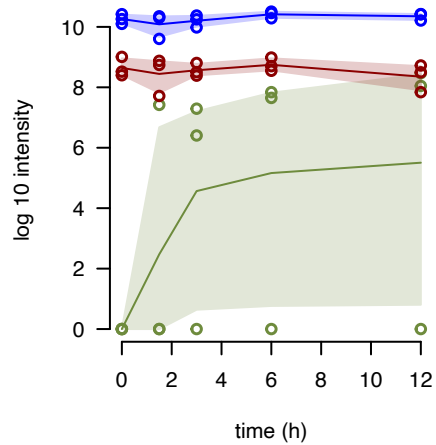**uL4m fraction 15**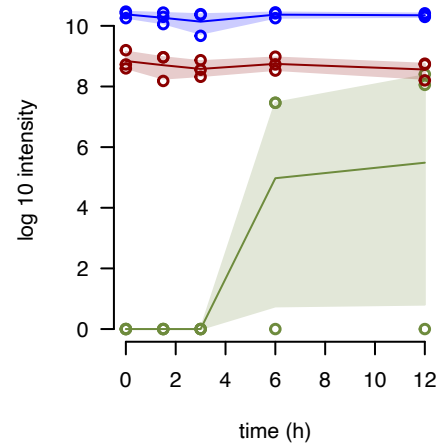**uL4m fraction 16**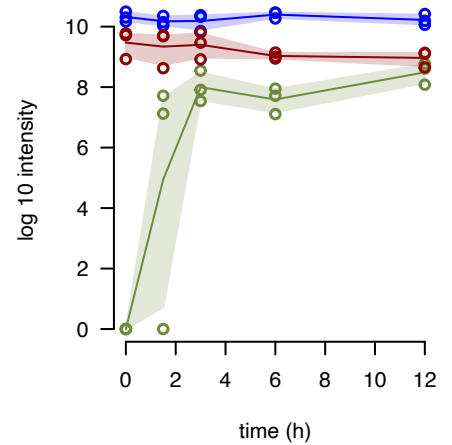































































































**mL54 fraction 1**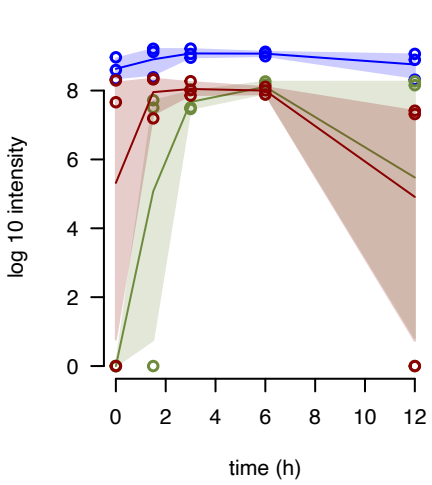**mL54 fraction 2**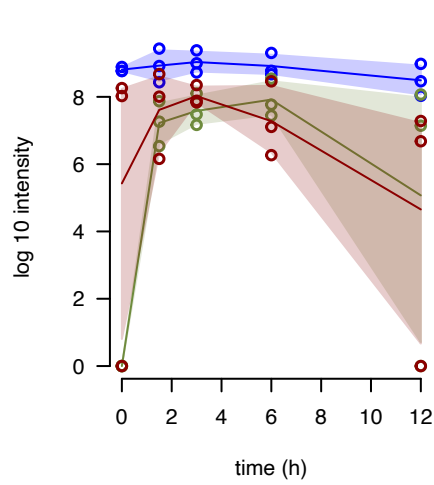**mL54 fraction 3**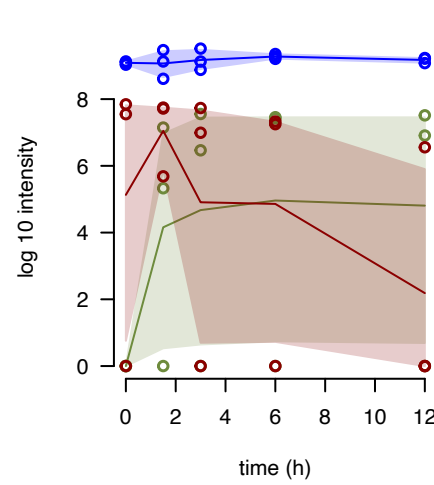**mL54 fraction 4**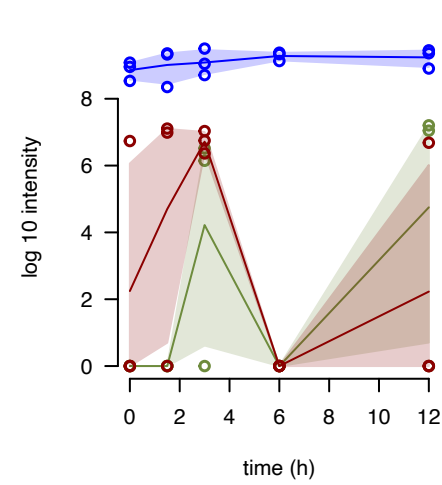**mL54 fraction 5**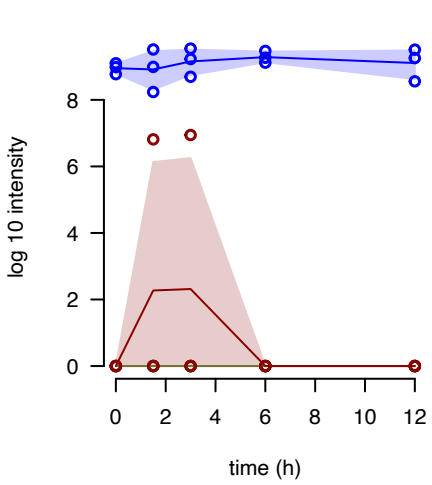**mL54 fraction 6**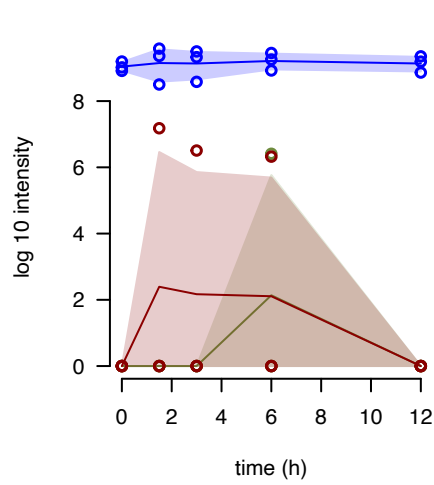**mL54 fraction 7**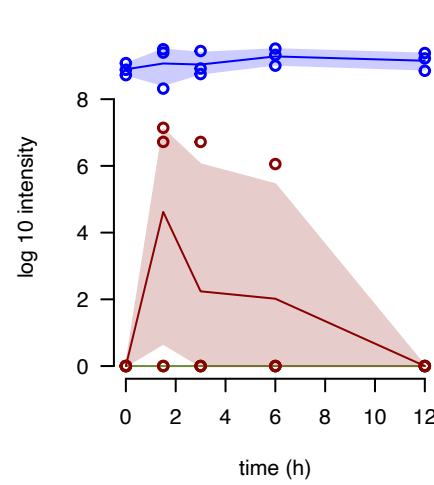**mL54 fraction 8**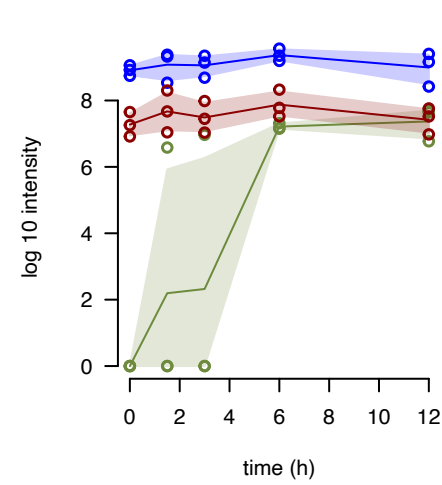**mL54 fraction 9**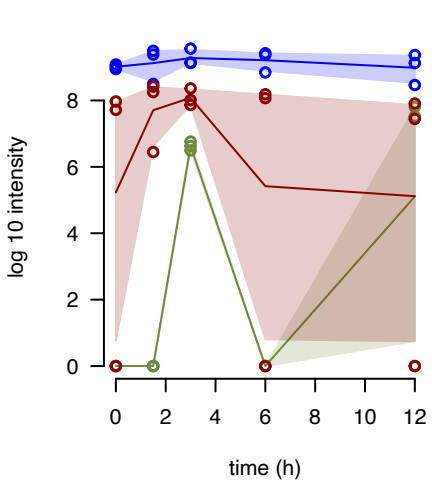**mL54 fraction 10**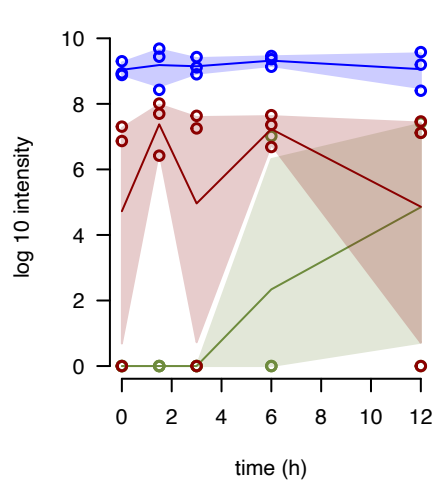**mL54 fraction 11**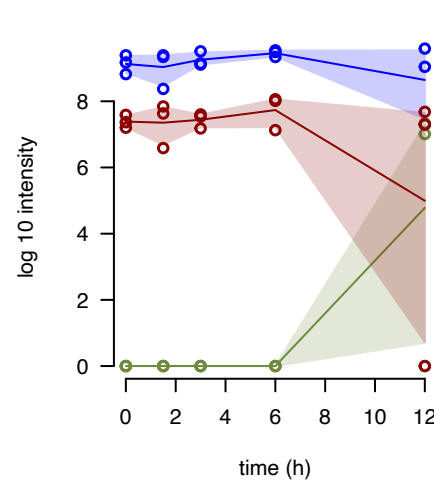**mL54 fraction 12**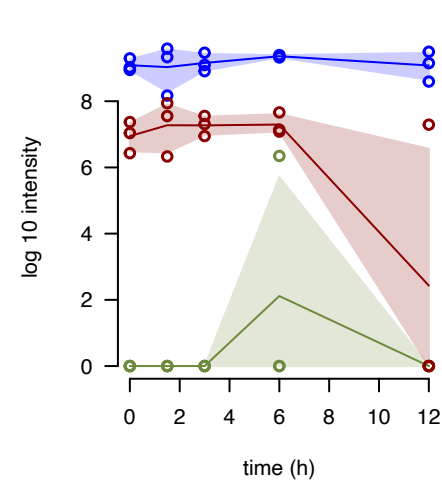**mL54 fraction 13**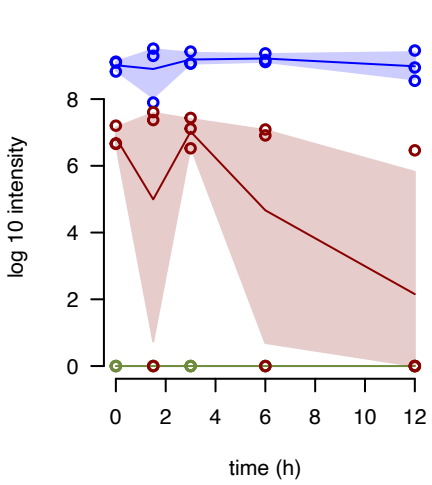**mL54 fraction 14**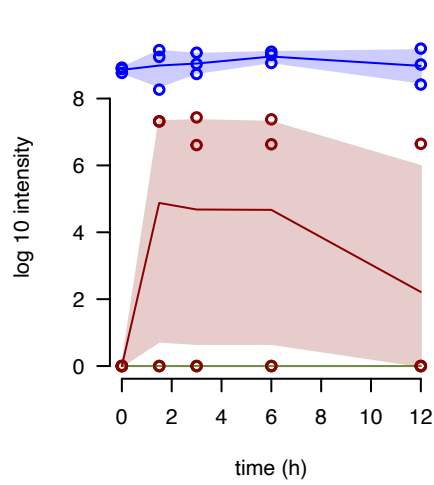**mL54 fraction 15**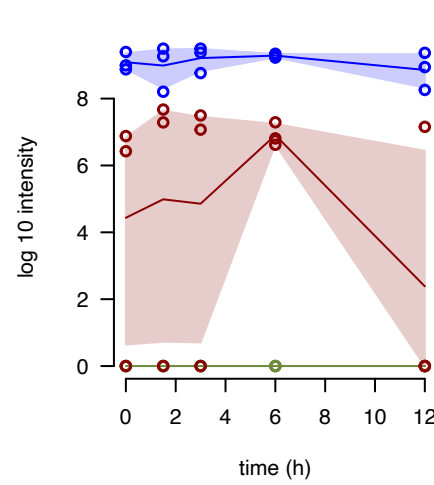**mL54 fraction 16**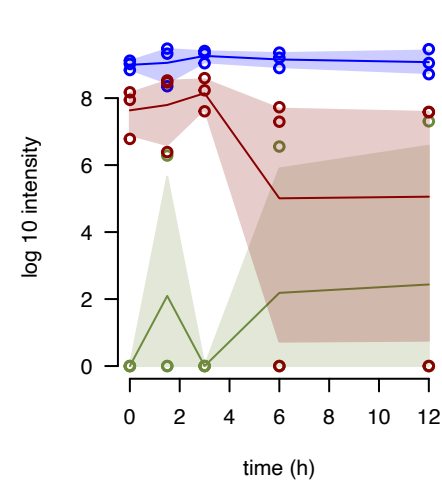

Supplement: 41594_2024_1356_MOESM6_ESM.pdf [file 41594_2024_1356_MOESM6_ESM.pdf]
