# Supplementary material for: A roadmap for ribosome assembly in human mitochondria
Source: PubMed Central journal article supplement (PMC11638073; doi:10.1038/s41594-024-01356-w), 2024-07-11

**bS1m fraction 1**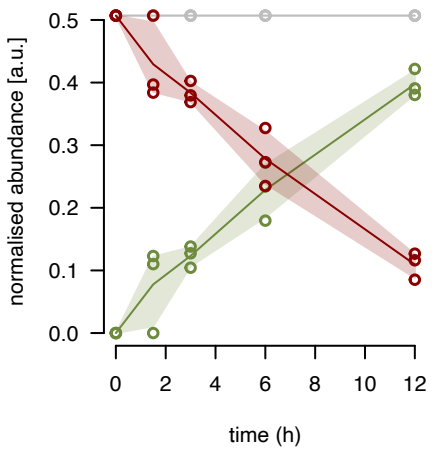**bS1m fraction 2**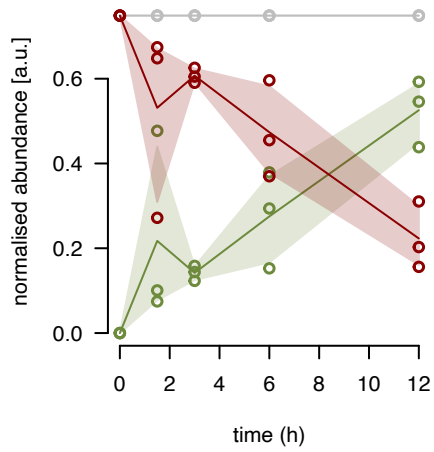**bS1m fraction 3**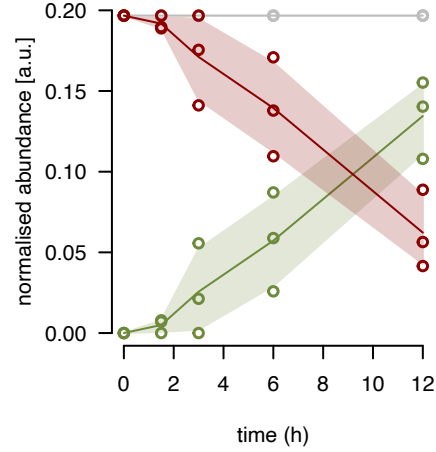**bS1m fraction 4**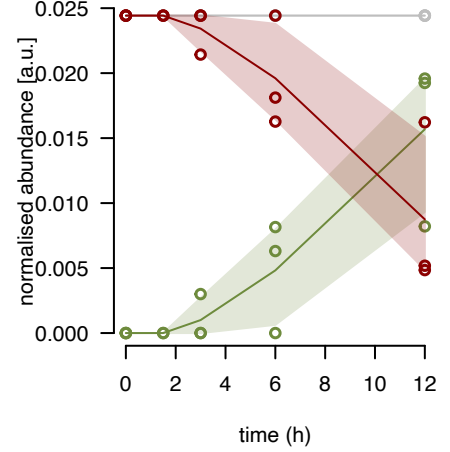**bS1m fraction 5**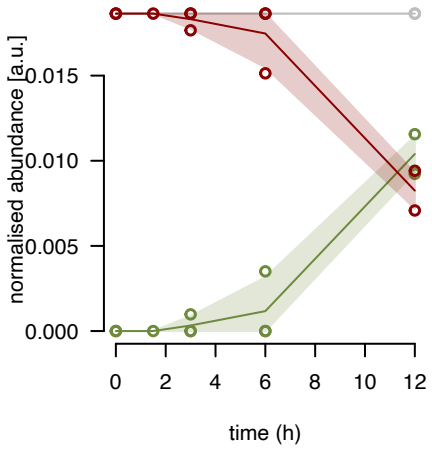**bS1m fraction 6**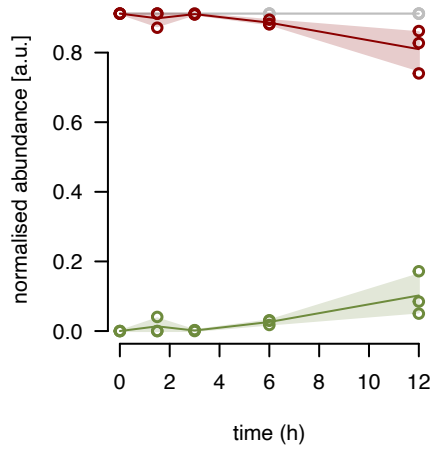**bS1m fraction 7**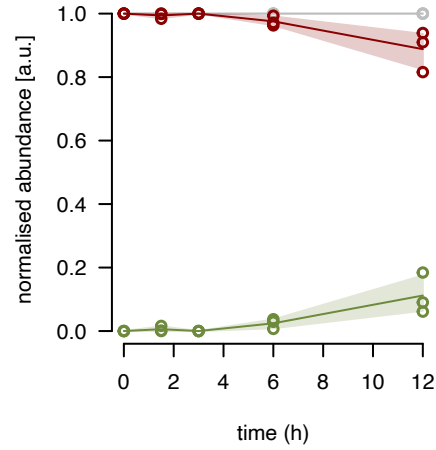**bS1m fraction 8**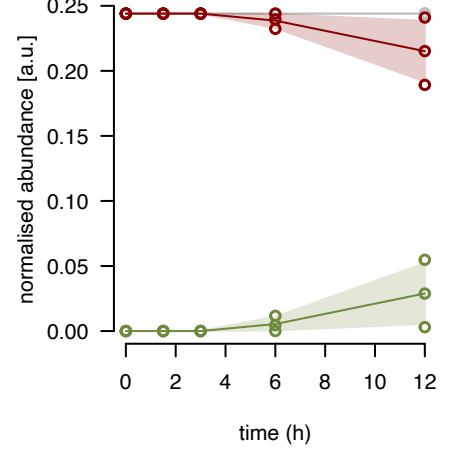**bS1m fraction 9**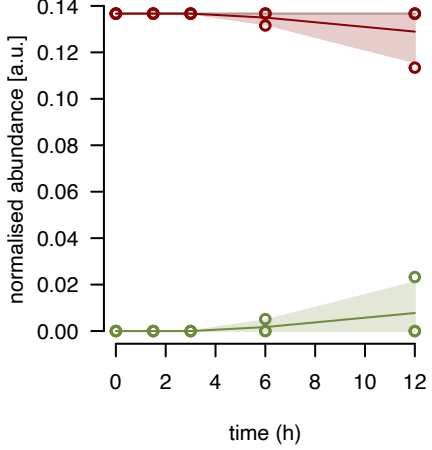**bS1m fraction 10**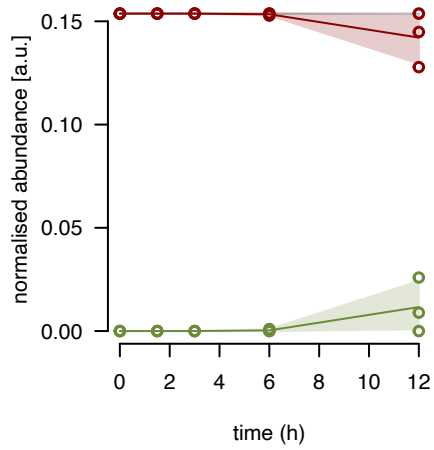**bS1m fraction 11**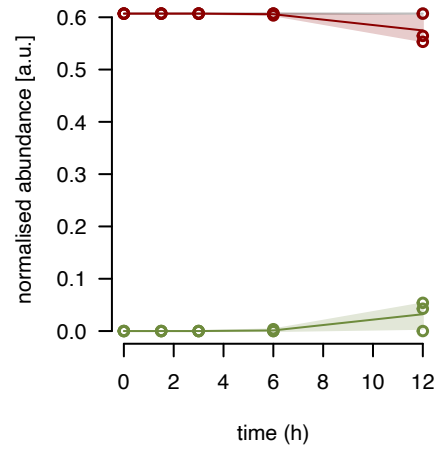**bS1m fraction 12**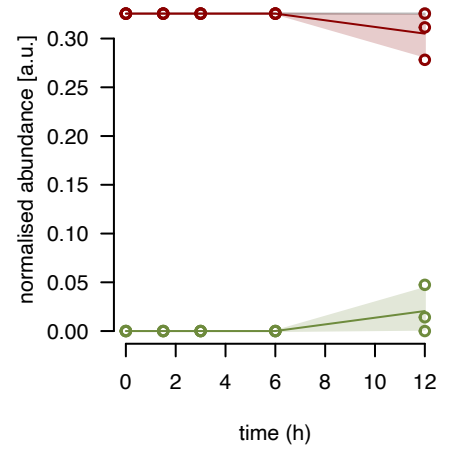**bS1m fraction 13**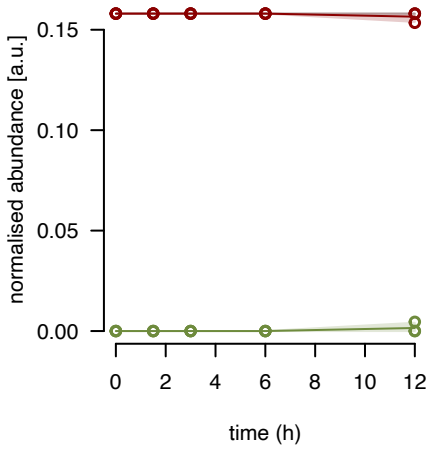**bS1m fraction 14**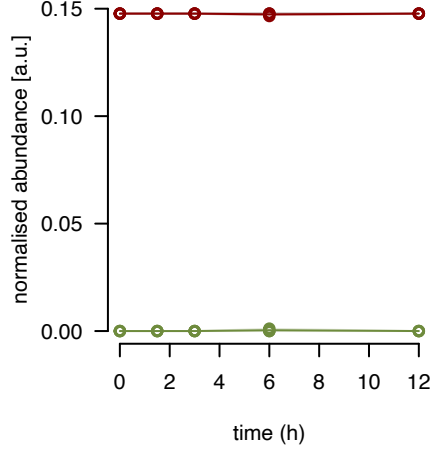**bS1m fraction 15**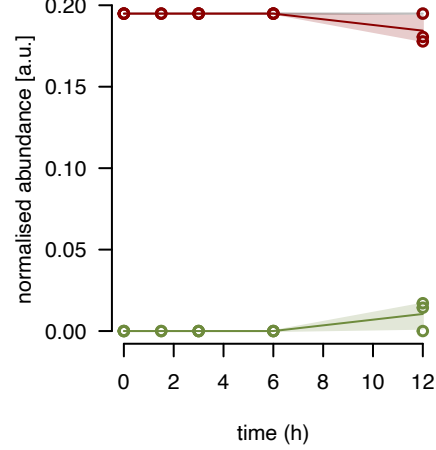**bS1m fraction 16**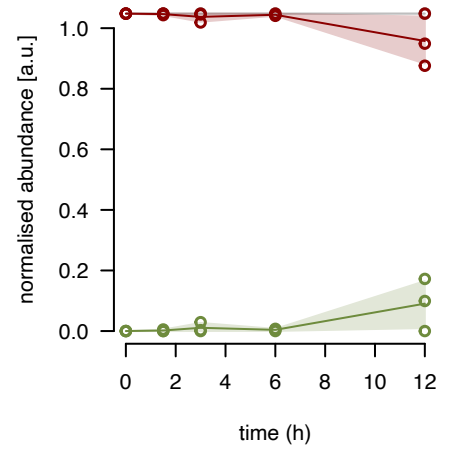

**uS2m fraction 1**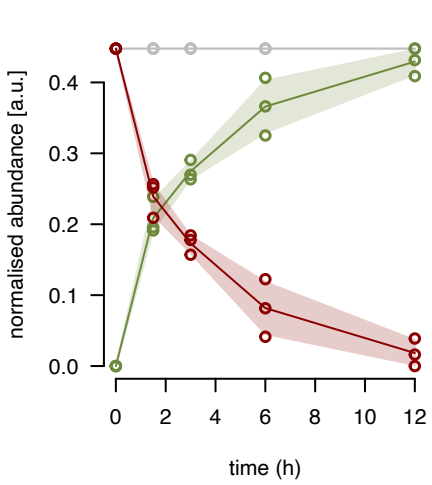**uS2m fraction 2**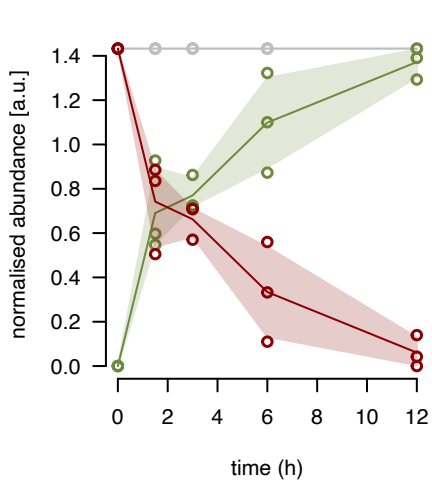**uS2m fraction 3**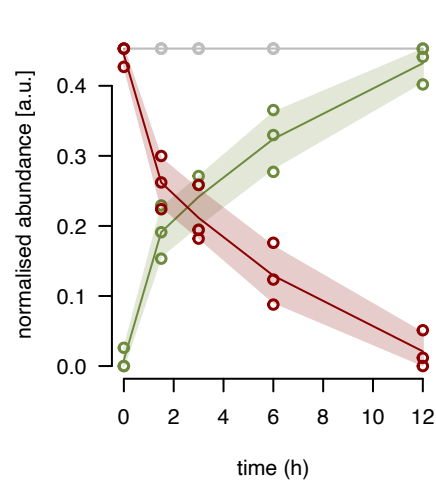**uS2m fraction 4**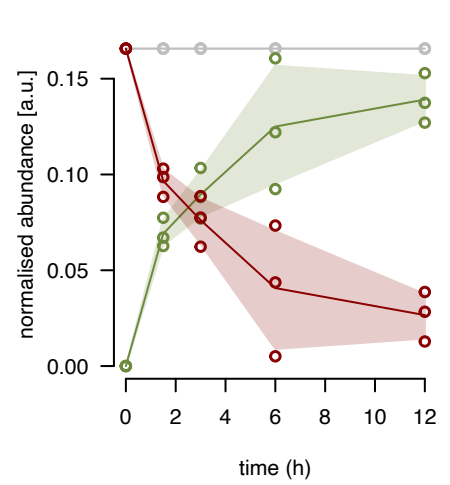**uS2m fraction 5**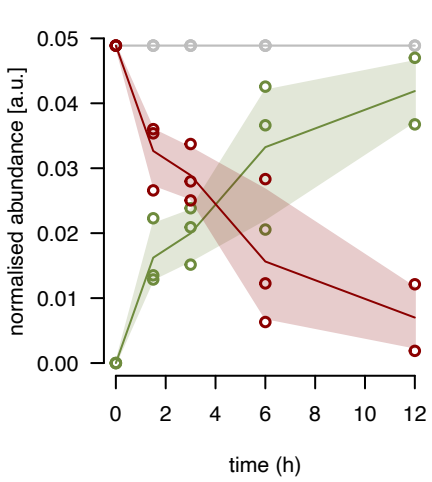**uS2m fraction 6**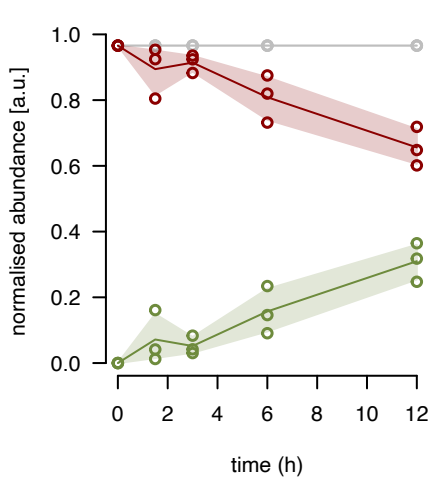**uS2m fraction 7**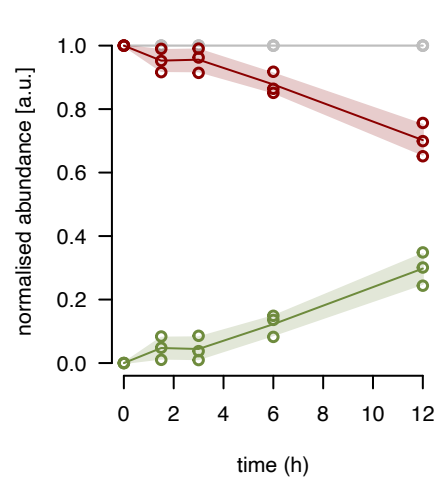**uS2m fraction 8**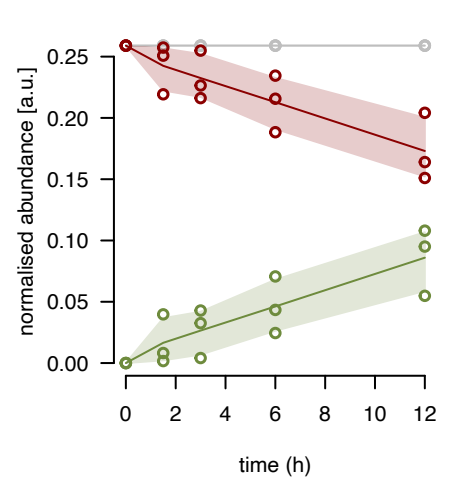**uS2m fraction 9**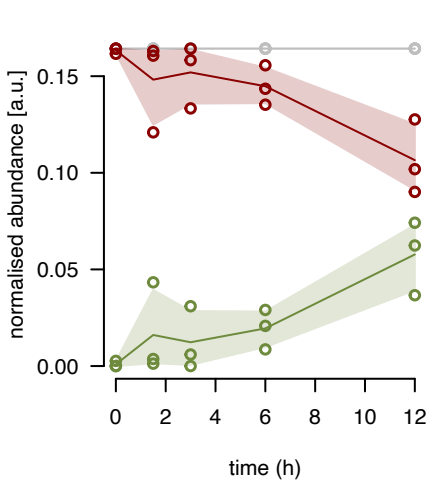**uS2m fraction 10**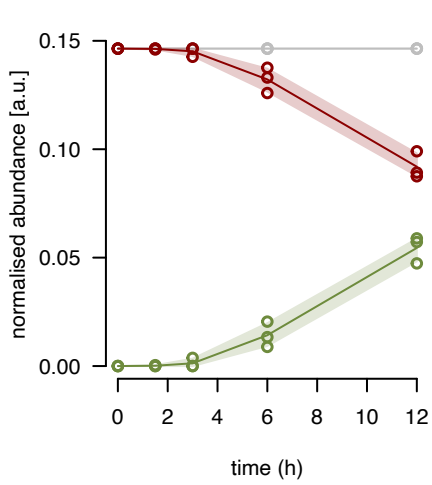**uS2m fraction 11**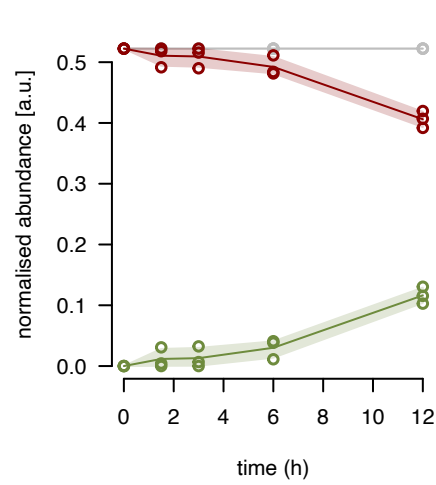**uS2m fraction 12**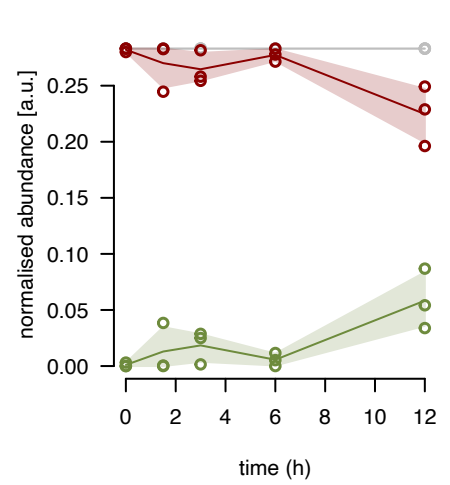**uS2m fraction 13**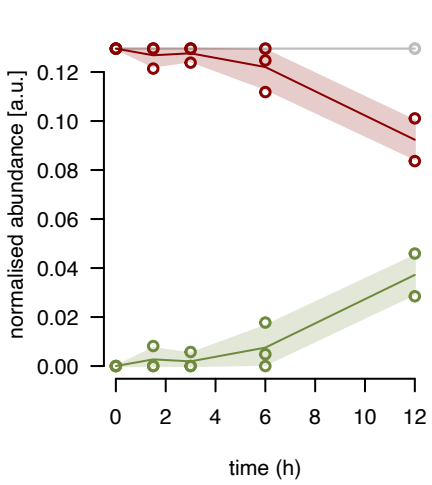**uS2m fraction 14**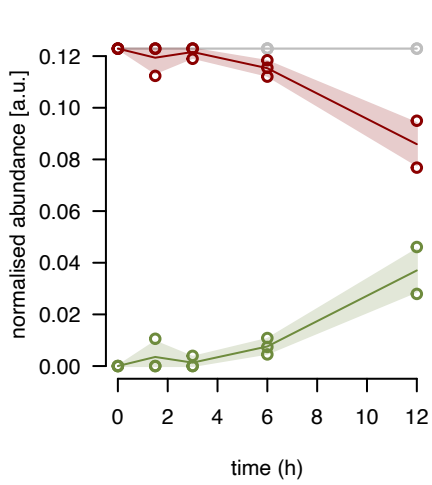**uS2m fraction 15**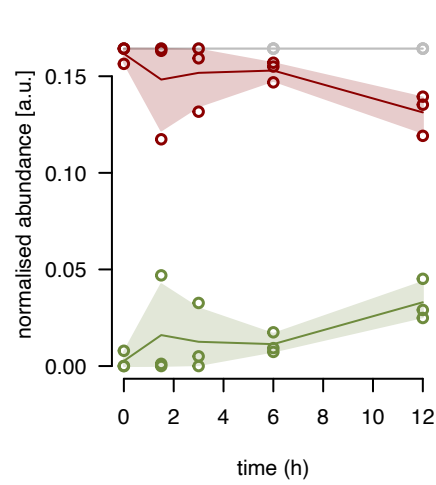**uS2m fraction 16**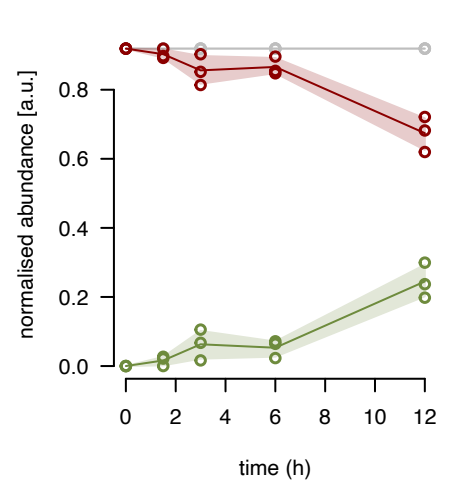

**uS3m fraction 1**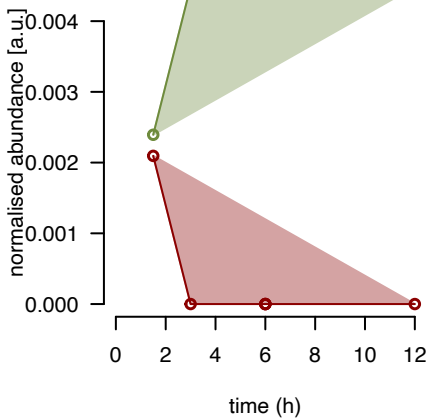**uS3m fraction 2**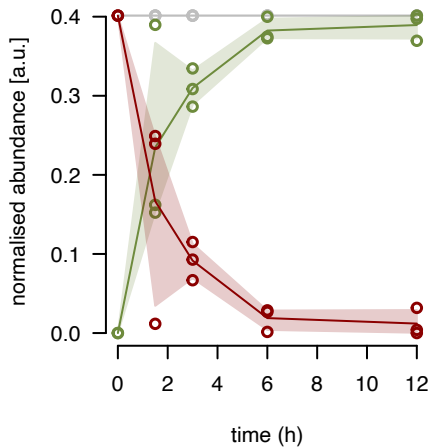**uS3m fraction 3**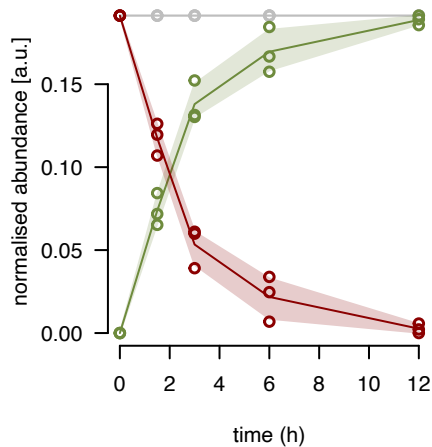**uS3m fraction 4**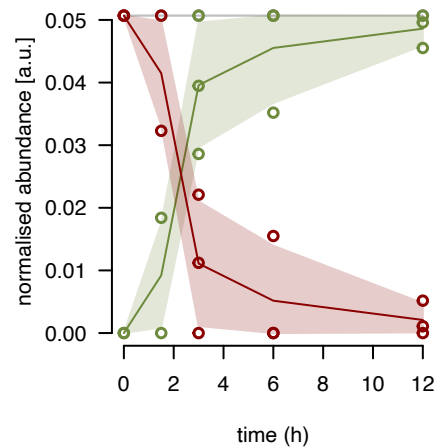**uS3m fraction 5**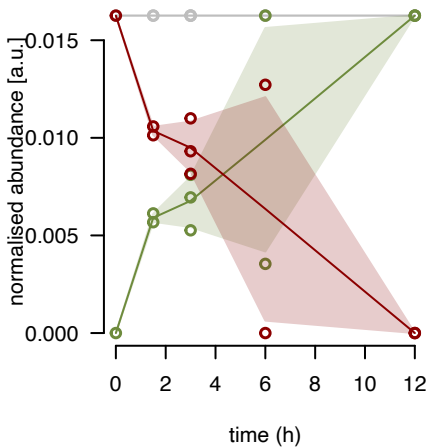**uS3m fraction 6**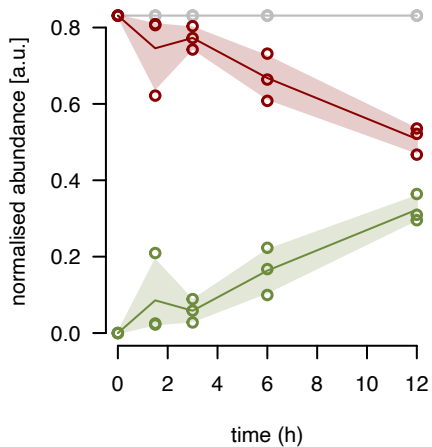**uS3m fraction 7**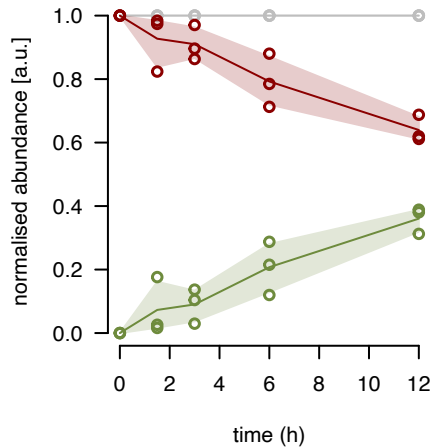**uS3m fraction 8**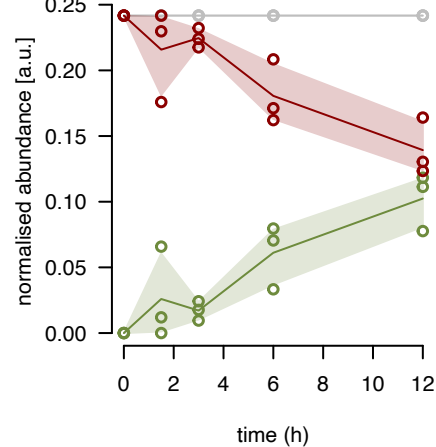**uS3m fraction 9**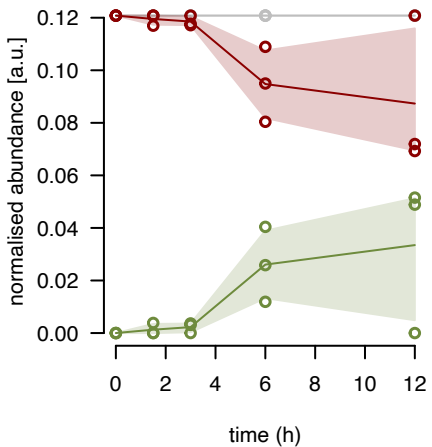**uS3m fraction 10**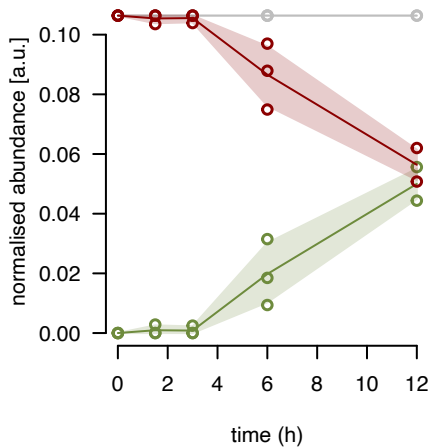**uS3m fraction 11**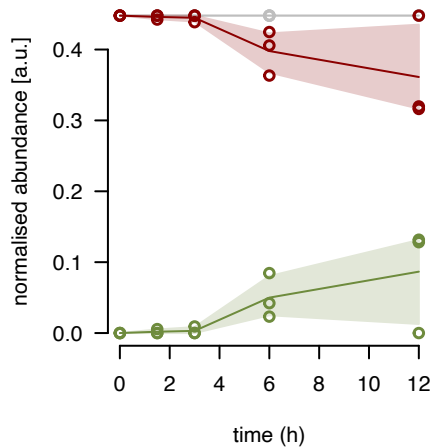**uS3m fraction 12**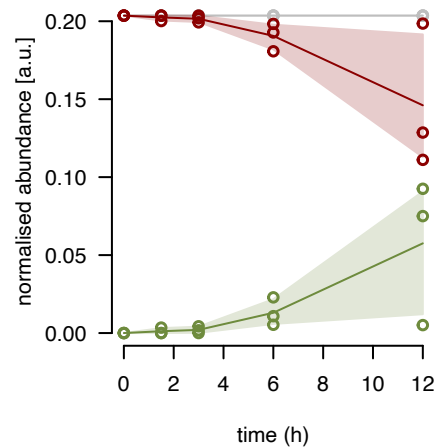**uS3m fraction 13**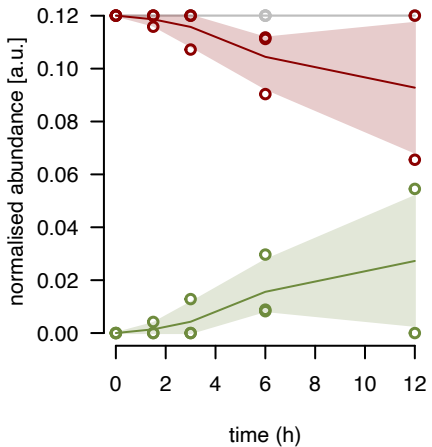**uS3m fraction 14**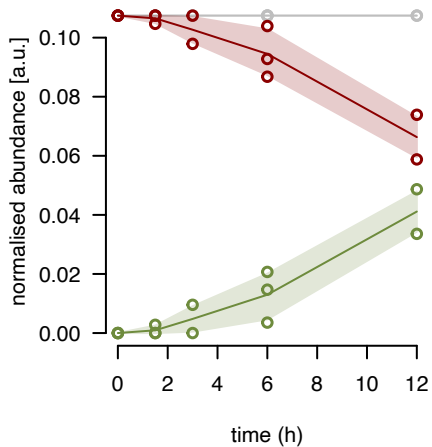**uS3m fraction 15**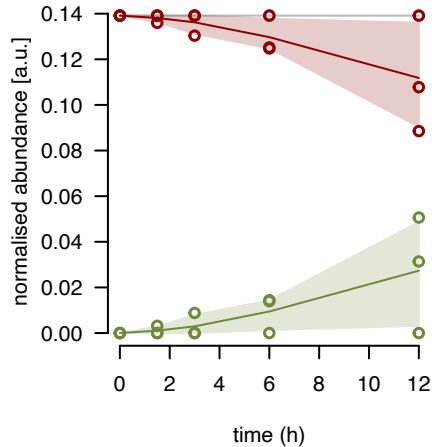**uS3m fraction 16**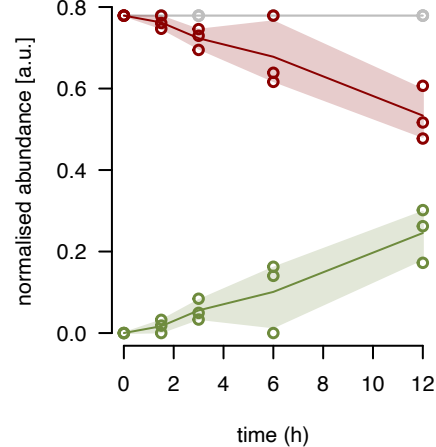

**uS5m fraction 1**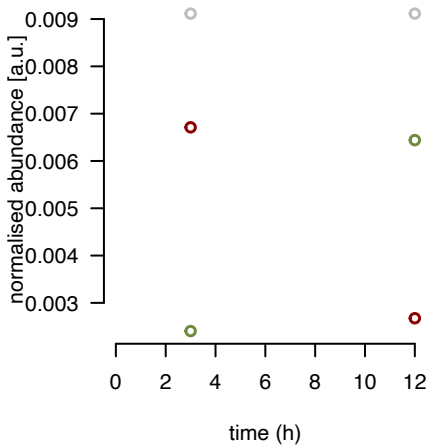**uS5m fraction 2**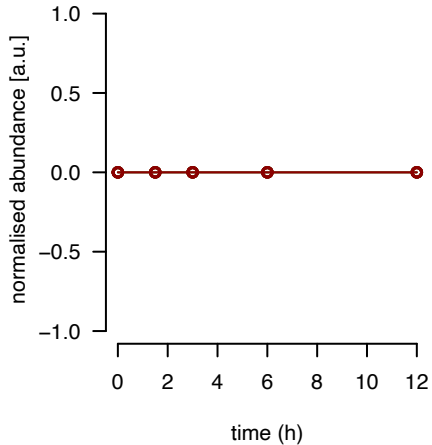**uS5m fraction 3**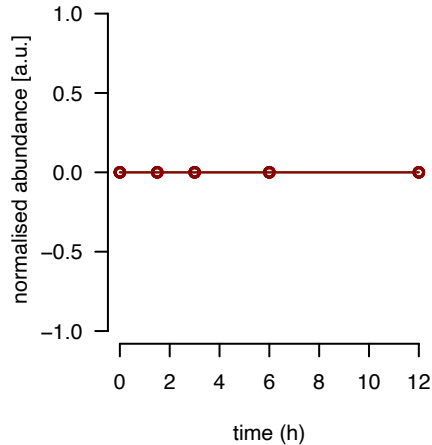**uS5m fraction 4**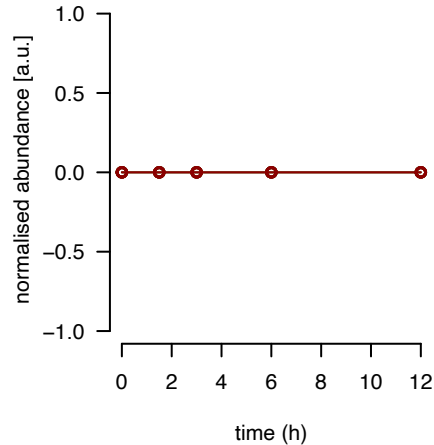**uS5m fraction 5**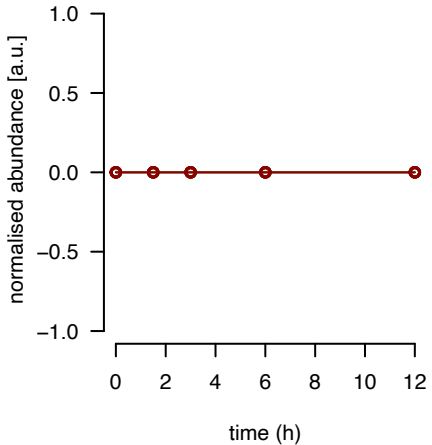**uS5m fraction 6**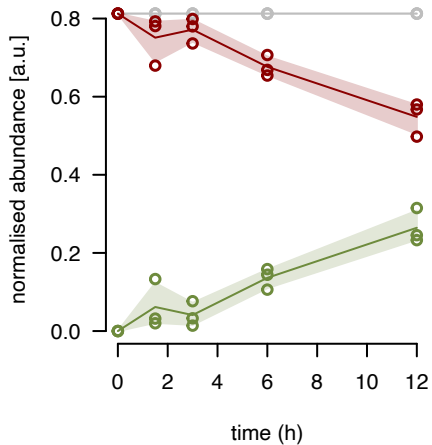**uS5m fraction 7**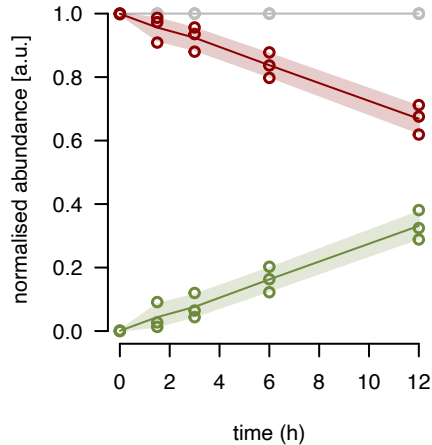**uS5m fraction 8**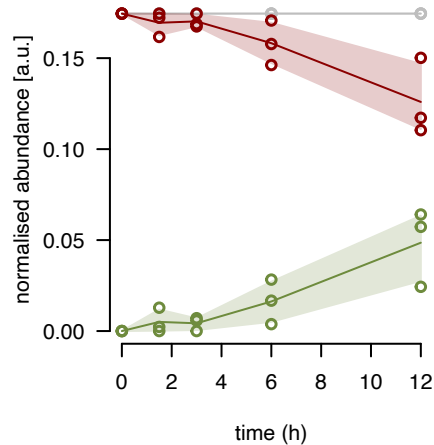**uS5m fraction 9**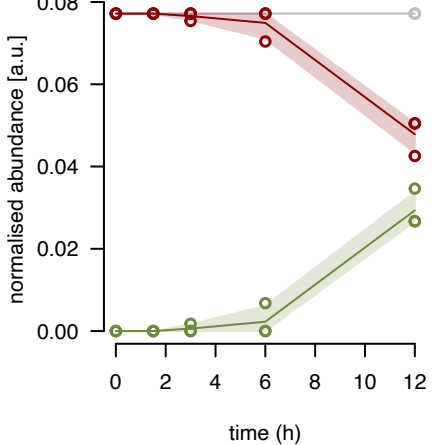**uS5m fraction 10**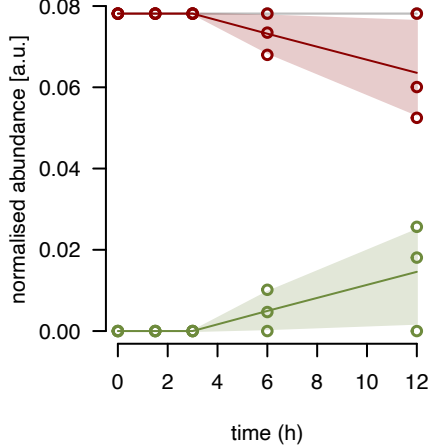**uS5m fraction 11**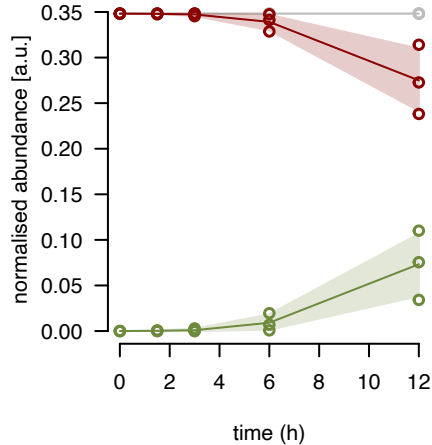**uS5m fraction 12**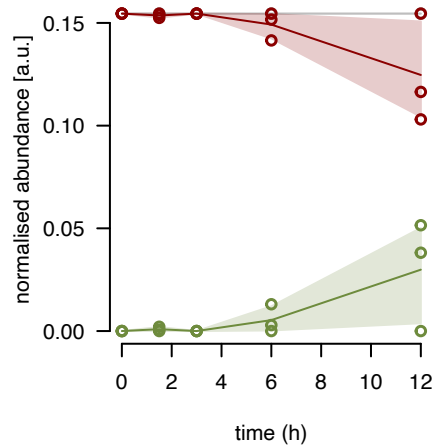**uS5m fraction 13**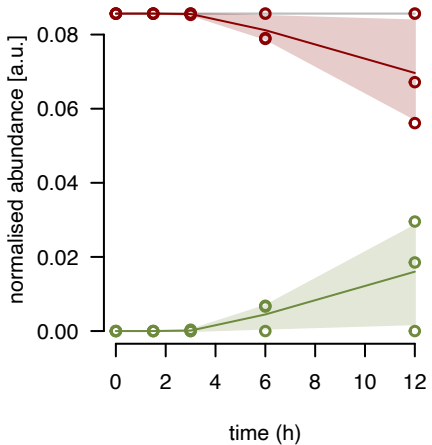**uS5m fraction 14**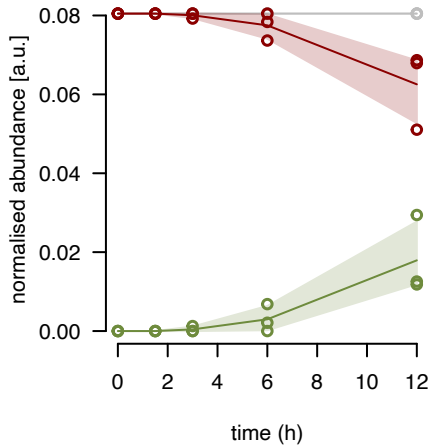**uS5m fraction 15**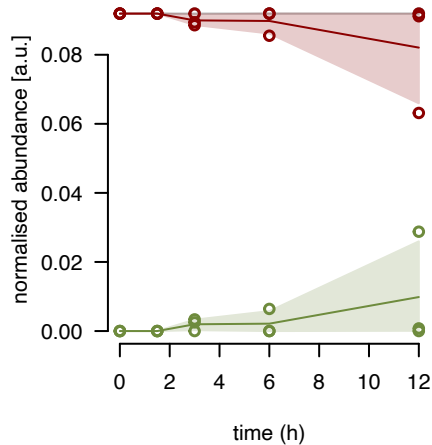**uS5m fraction 16**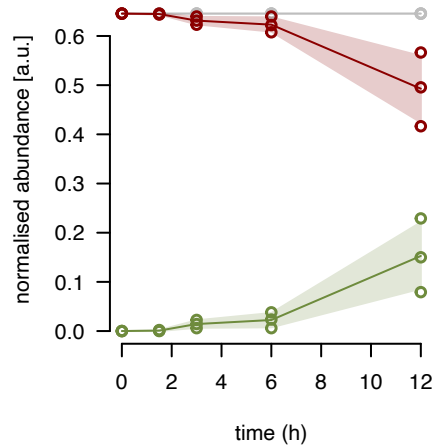

**bS6m fraction 1**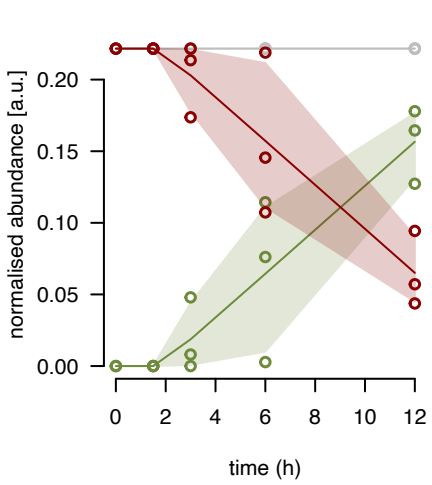**bS6m fraction 2**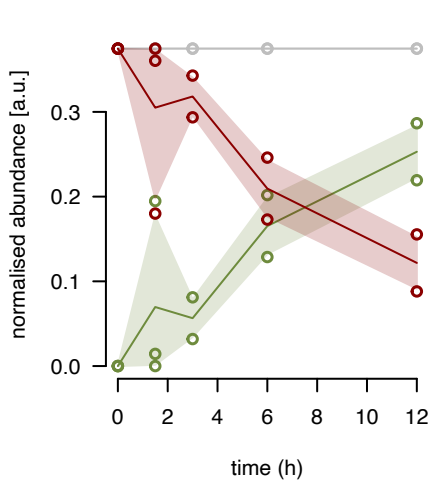**bS6m fraction 3**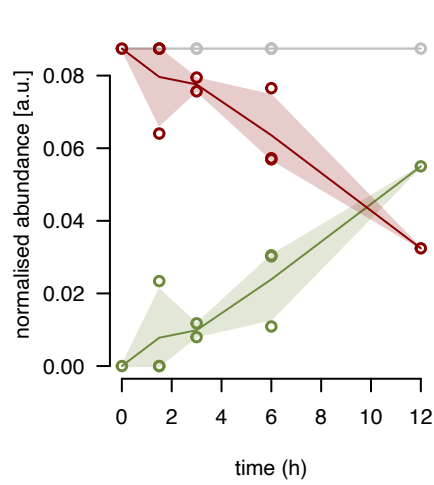**bS6m fraction 4**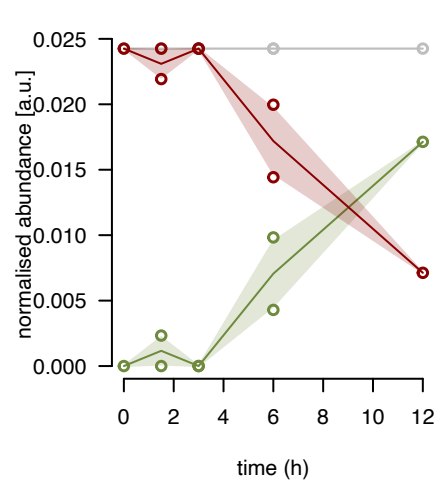**bS6m fraction 5**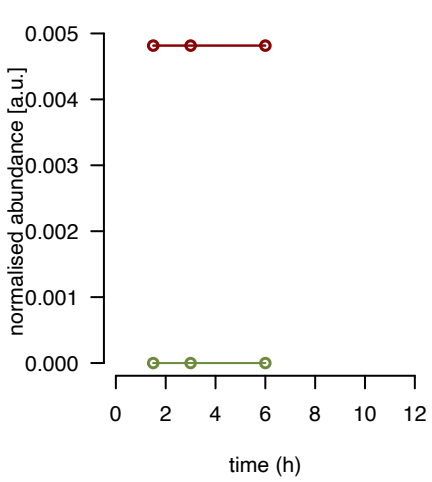**bS6m fraction 6**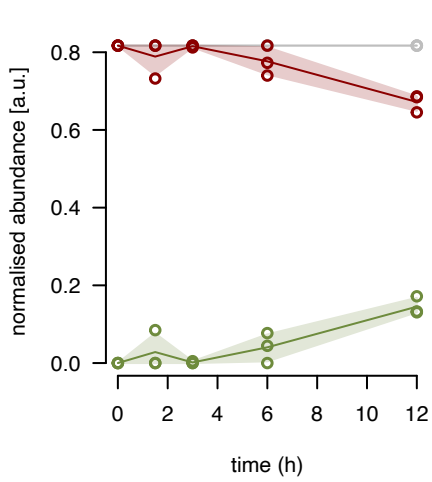**bS6m fraction 7**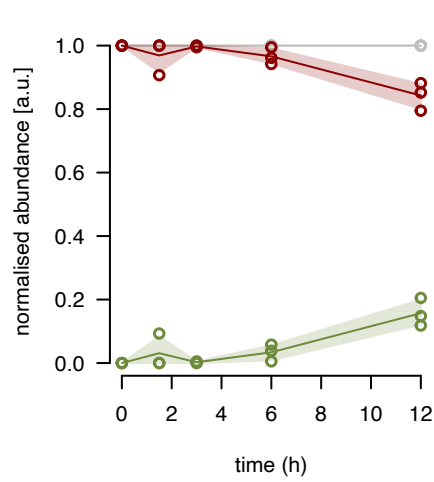**bS6m fraction 8**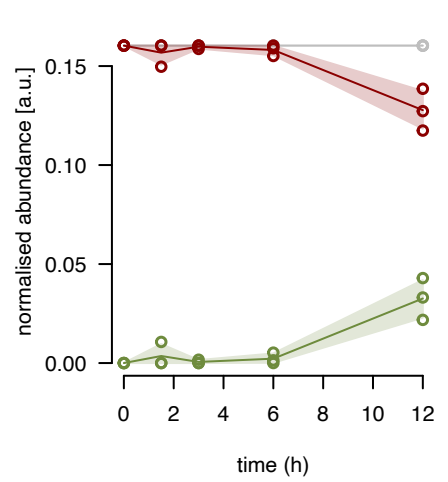**bS6m fraction 9**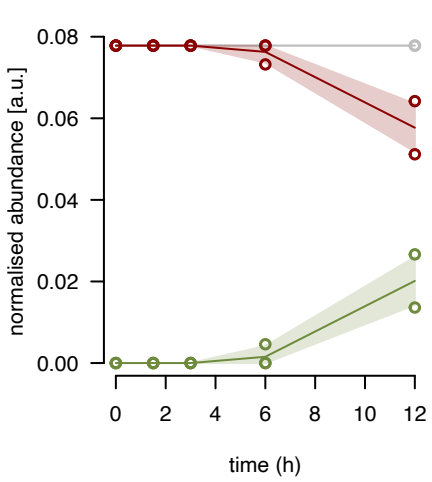**bS6m fraction 10**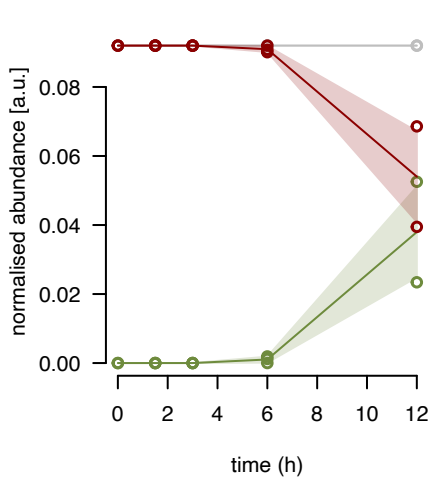**bS6m fraction 11**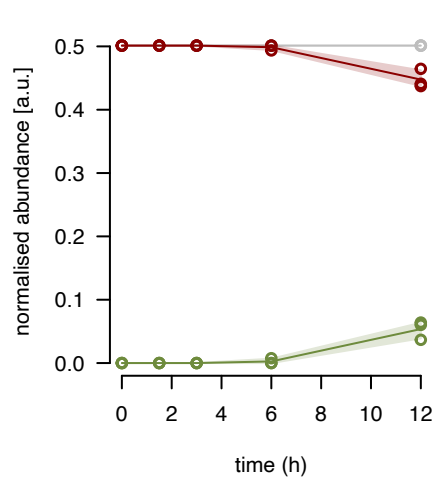**bS6m fraction 12**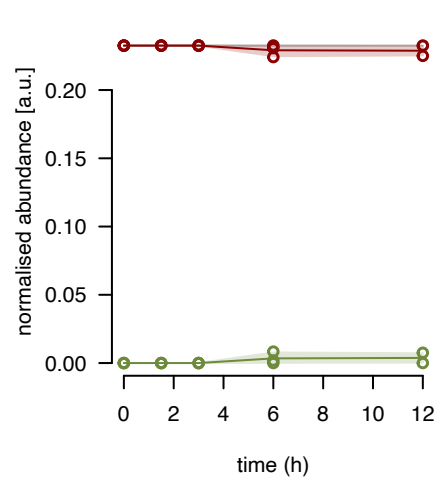**bS6m fraction 13**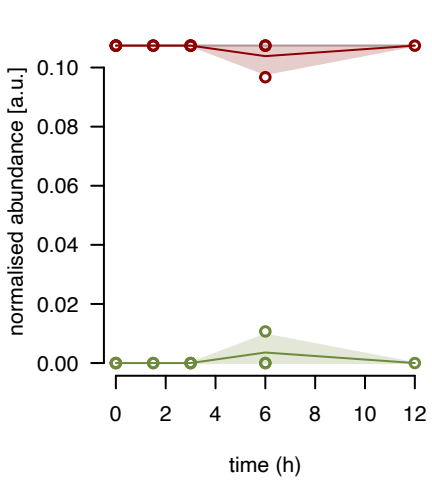**bS6m fraction 14**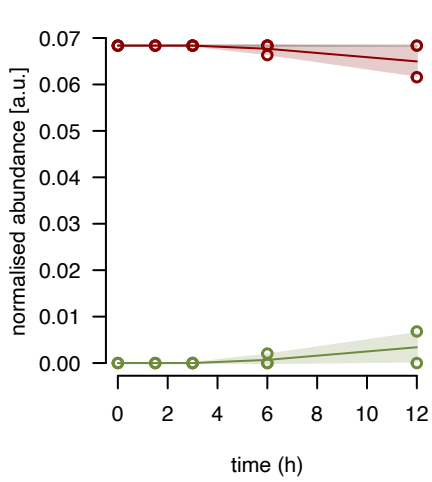**bS6m fraction 15**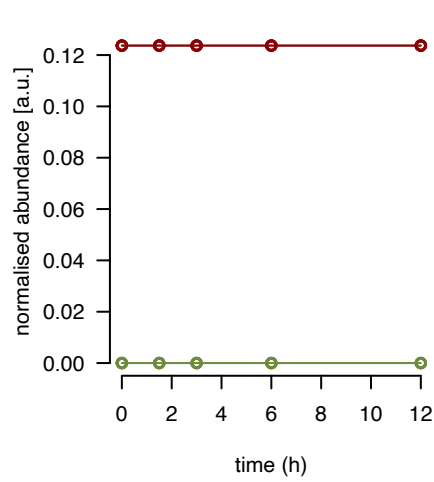**bS6m fraction 16**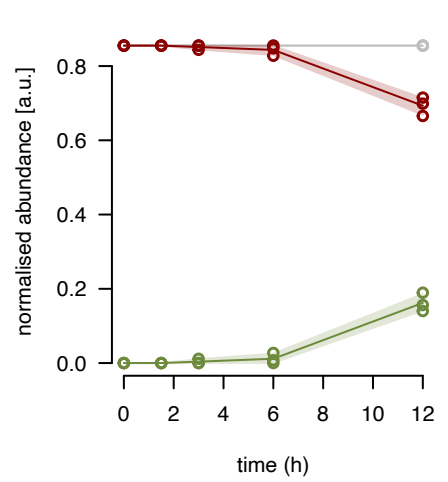

**uS7m fraction 1**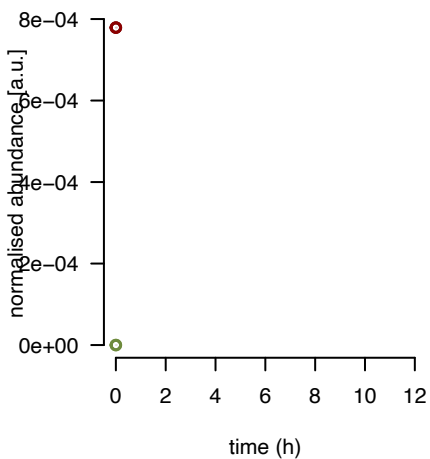**uS7m fraction 2**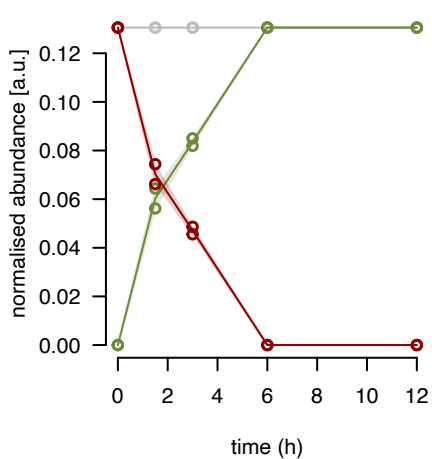**uS7m fraction 3**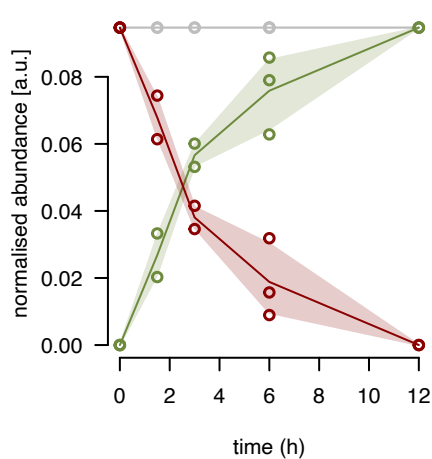**uS7m fraction 4**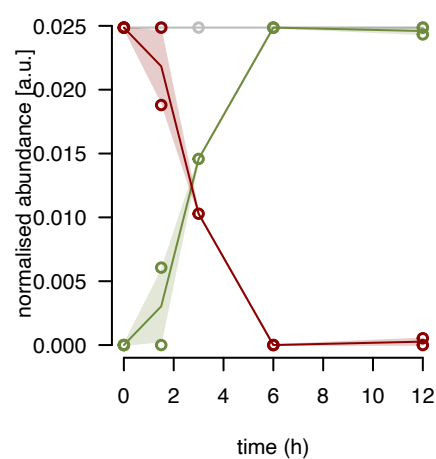**uS7m fraction 5**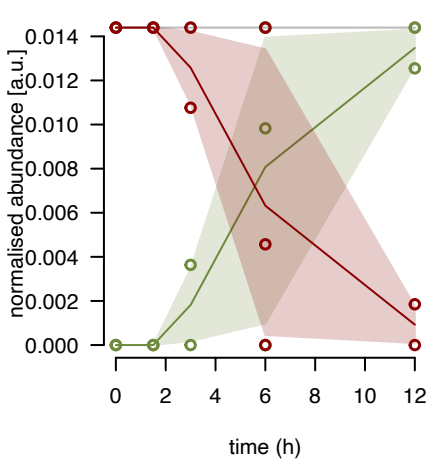**uS7m fraction 6**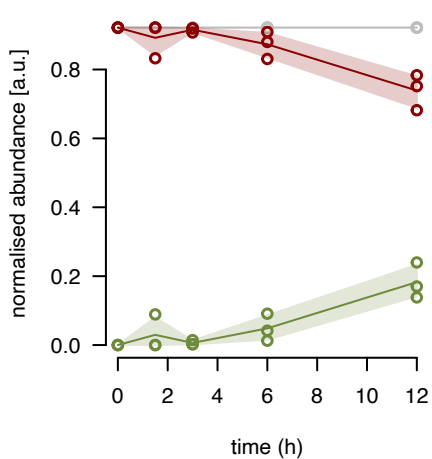**uS7m fraction 7**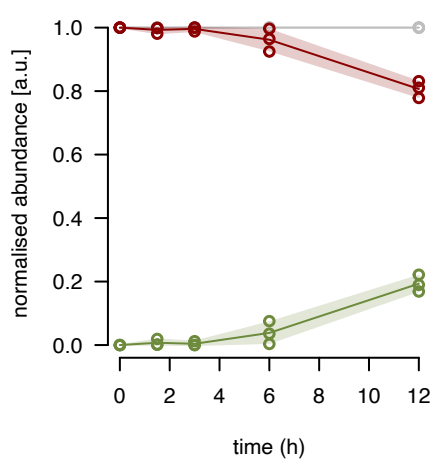**uS7m fraction 8**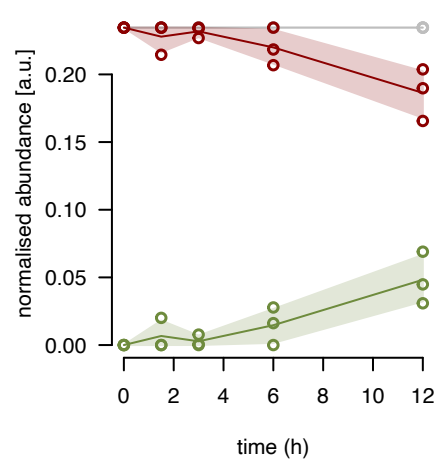**uS7m fraction 9**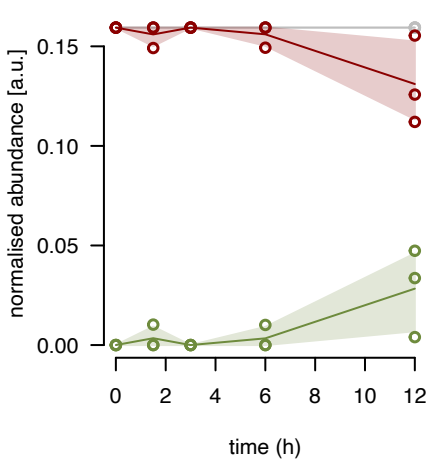**uS7m fraction 10**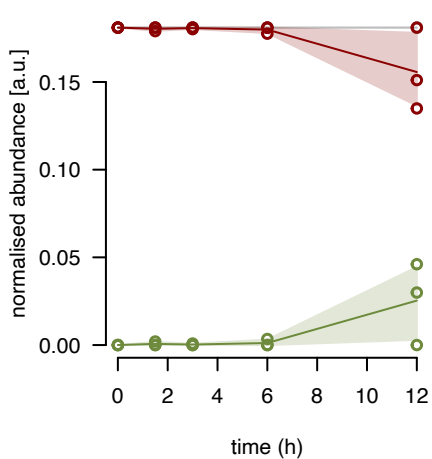**uS7m fraction 11**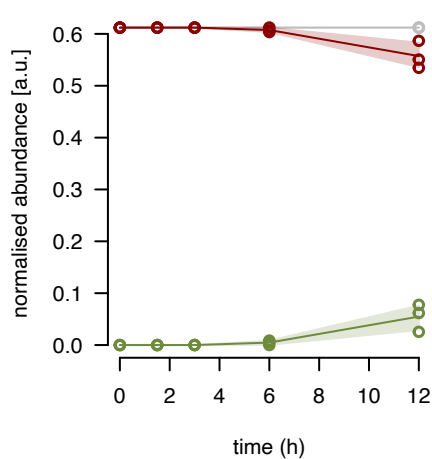**uS7m fraction 12**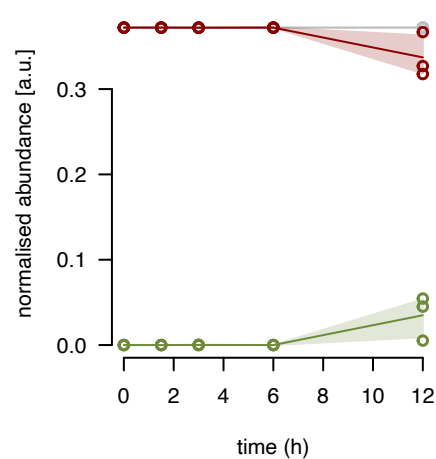**uS7m fraction 13**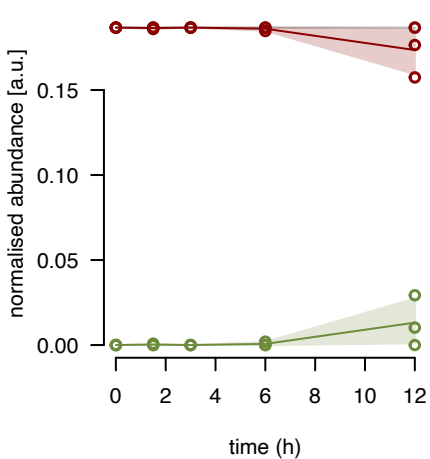**uS7m fraction 14**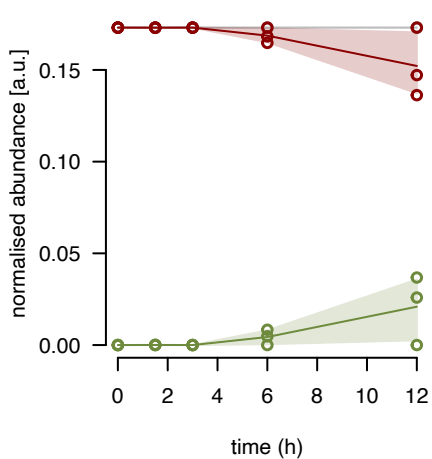**uS7m fraction 15**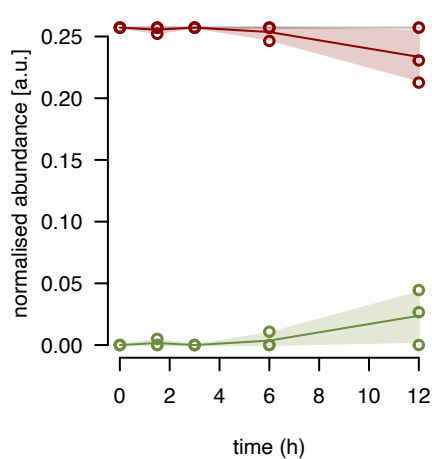**uS7m fraction 16**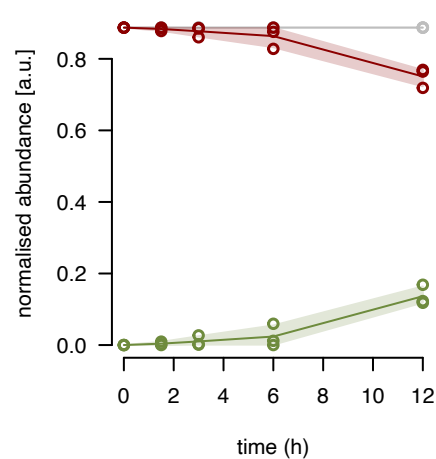



**uS10m fraction 1**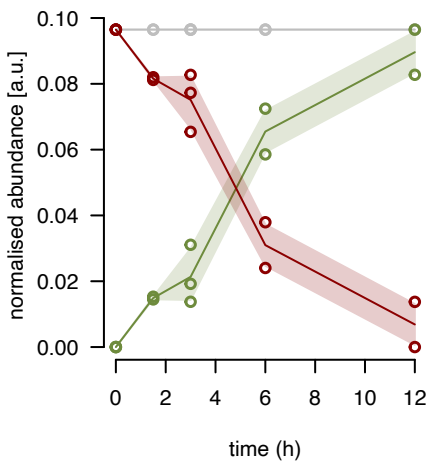**uS10m fraction 2**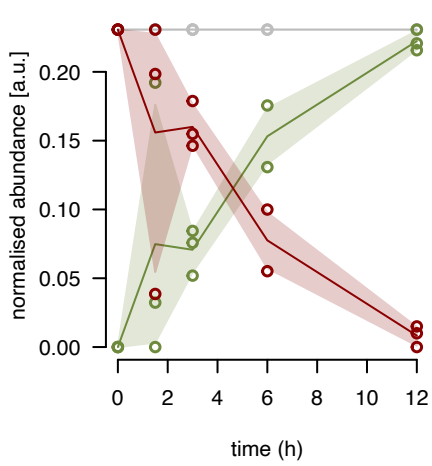**uS10m fraction 3**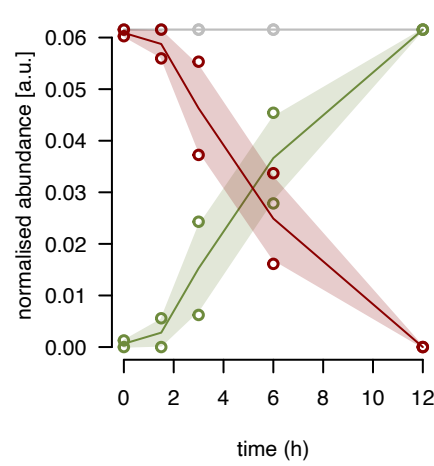**uS10m fraction 4**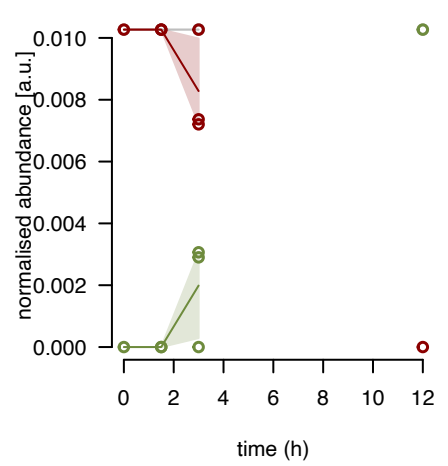**uS10m fraction 5**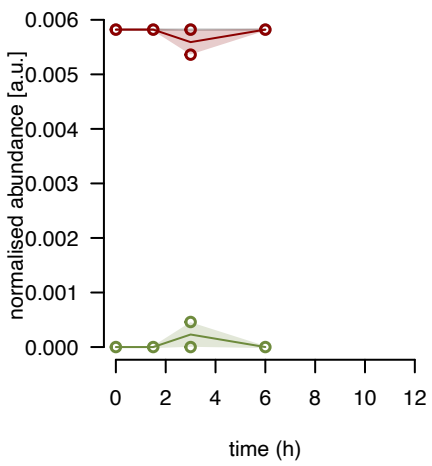**uS10m fraction 6**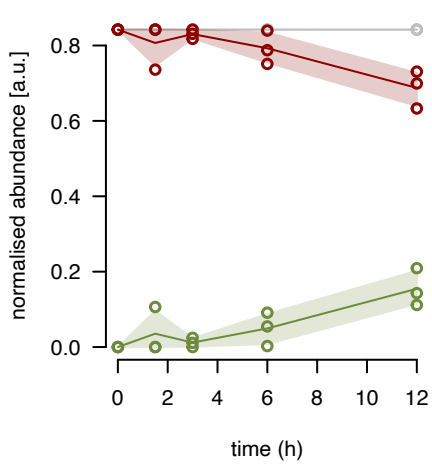**uS10m fraction 7**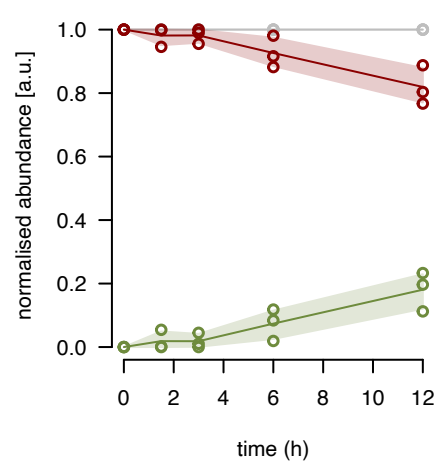**uS10m fraction 8**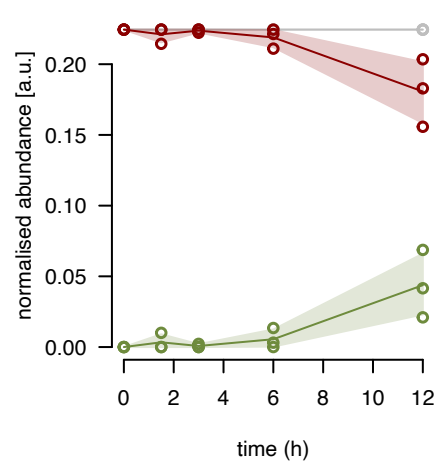**uS10m fraction 9**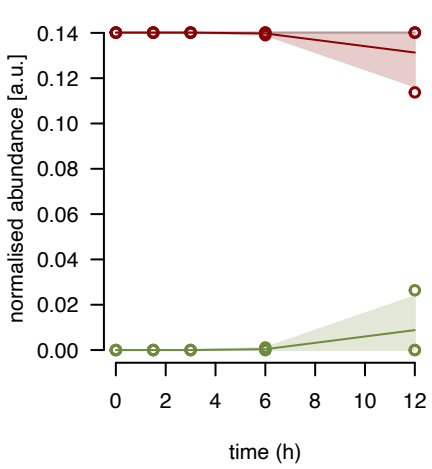**uS10m fraction 10**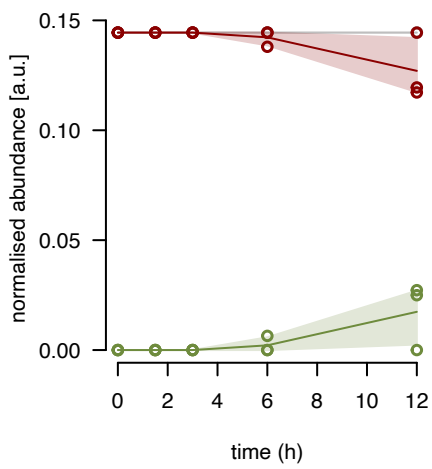**uS10m fraction 11**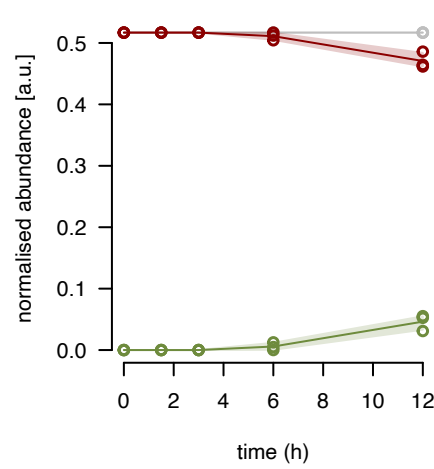**uS10m fraction 12**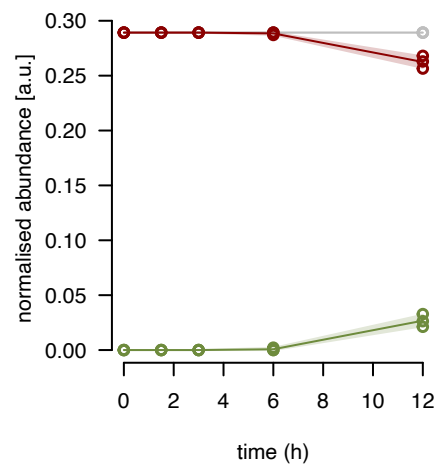**uS10m fraction 13**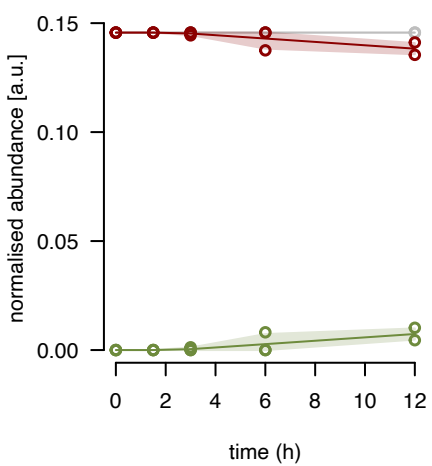**uS10m fraction 14**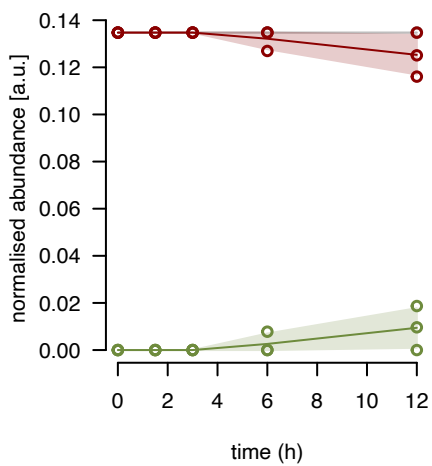**uS10m fraction 15**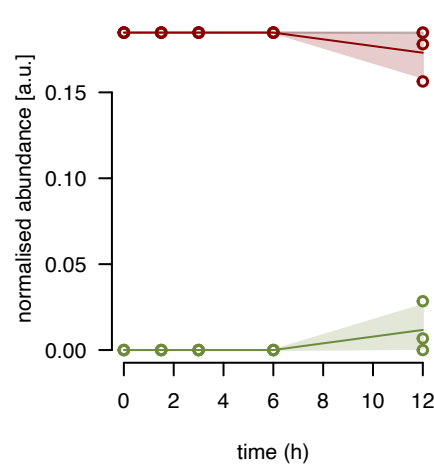**uS10m fraction 16**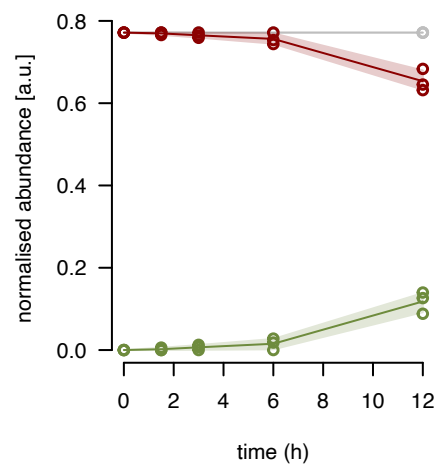



**uS11m fraction 1**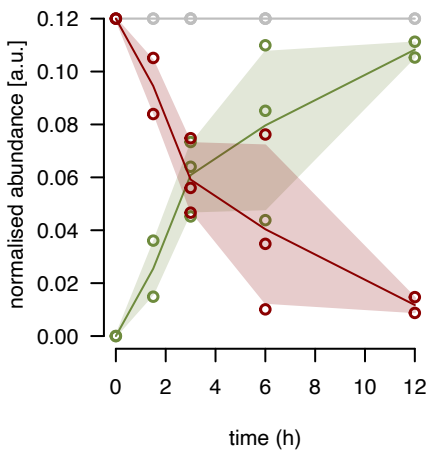**uS11m fraction 2**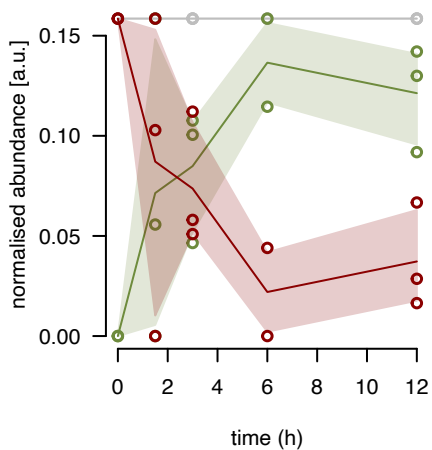**uS11m fraction 3**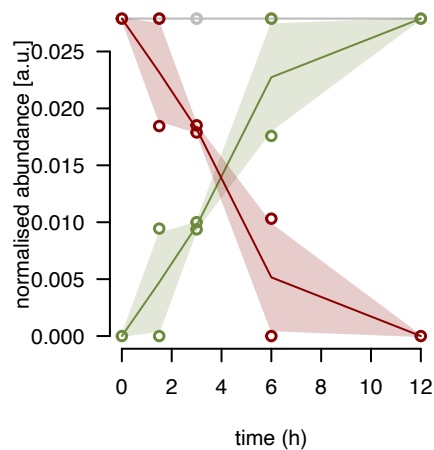**uS11m fraction 4**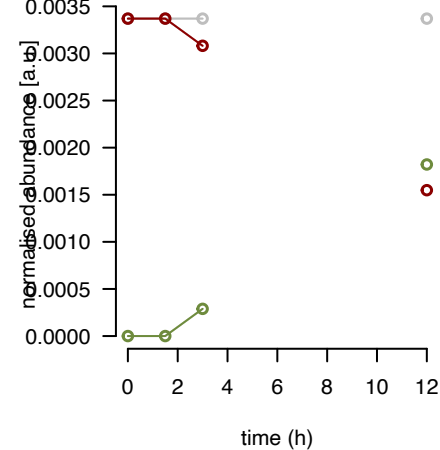**uS11m fraction 5**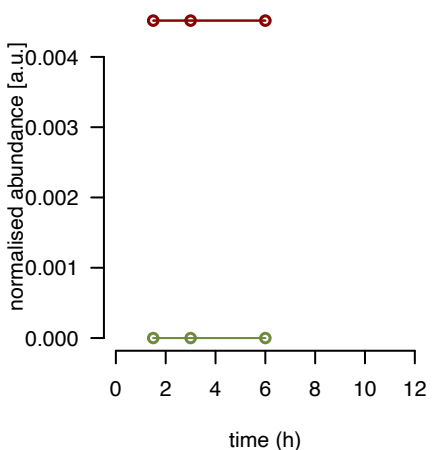**uS11m fraction 6**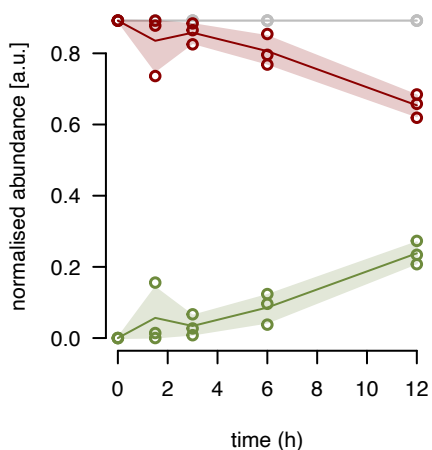**uS11m fraction 7**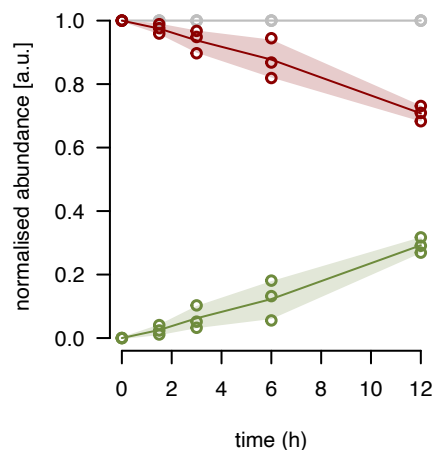**uS11m fraction 8**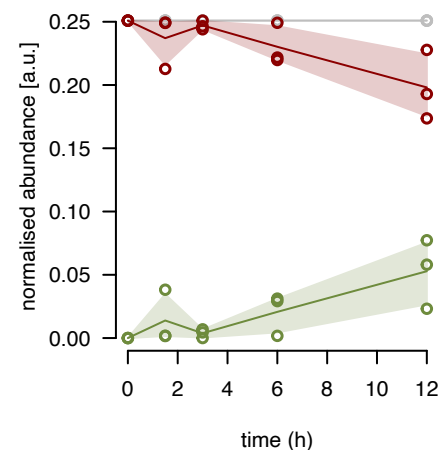**uS11m fraction 9**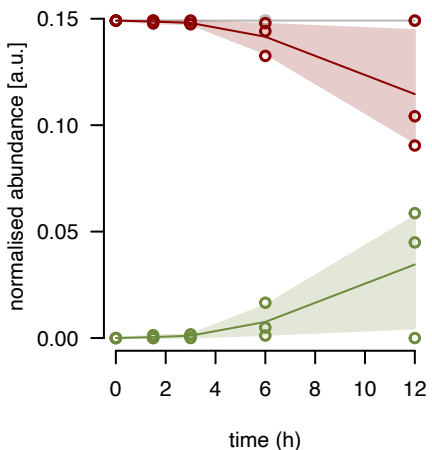**uS11m fraction 10**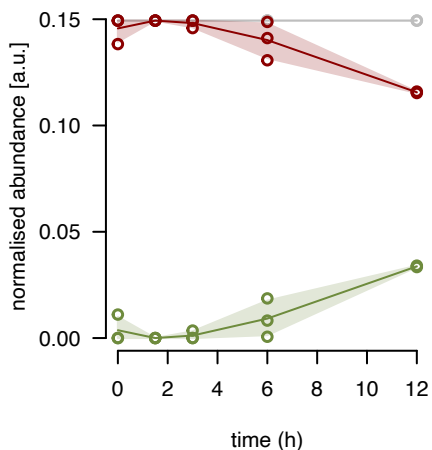**uS11m fraction 11**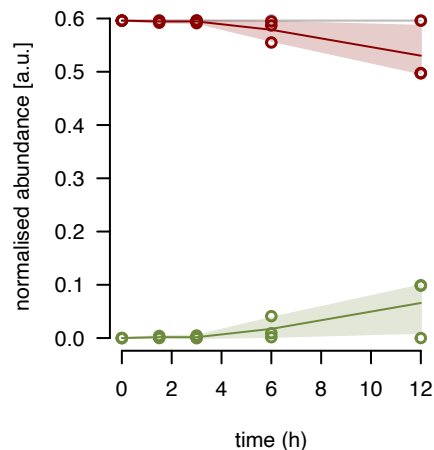**uS11m fraction 12**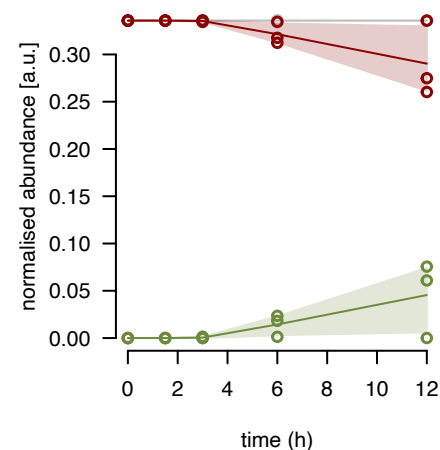**uS11m fraction 13**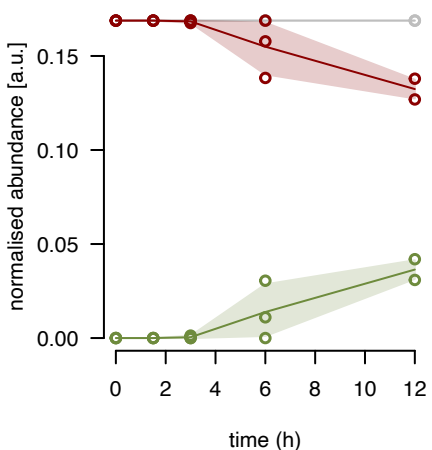**uS11m fraction 14**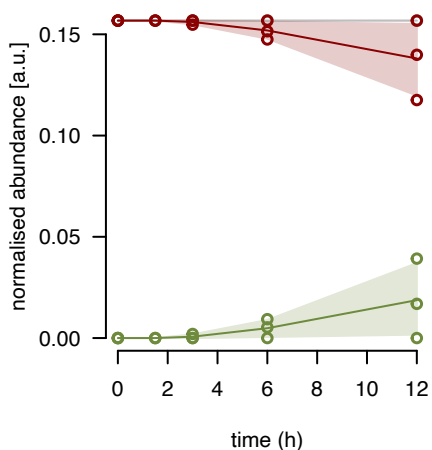**uS11m fraction 15**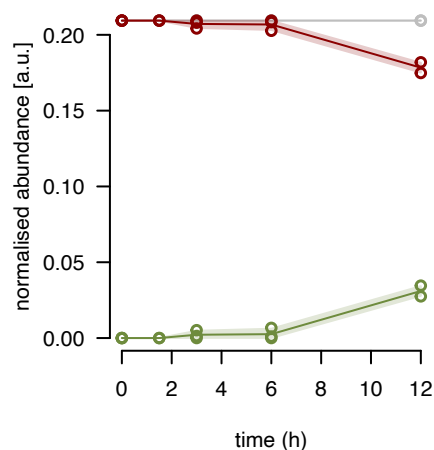**uS11m fraction 16**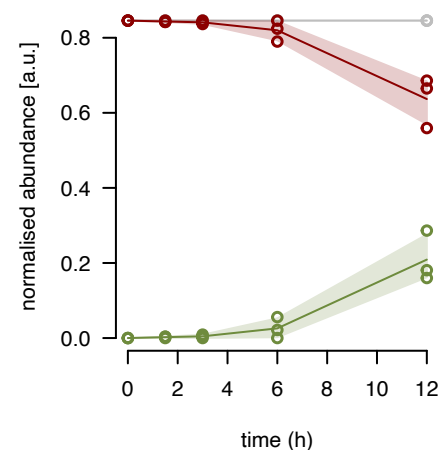

**uS12m fraction 1**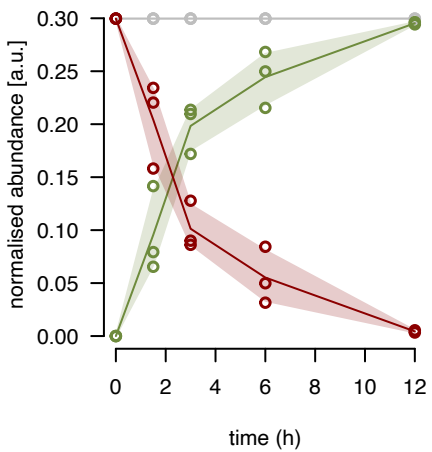**uS12m fraction 2**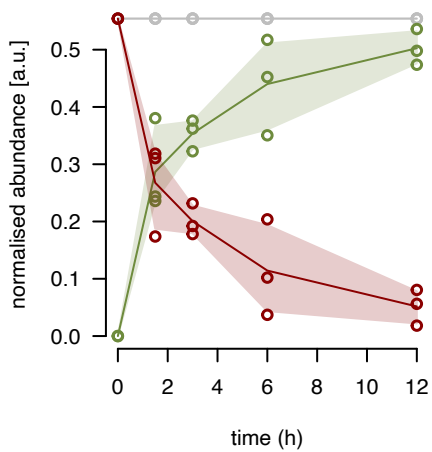**uS12m fraction 3**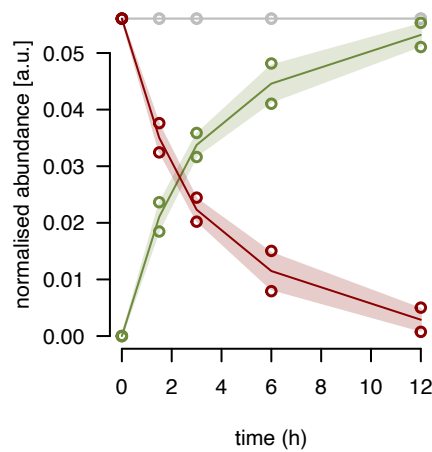**uS12m fraction 4**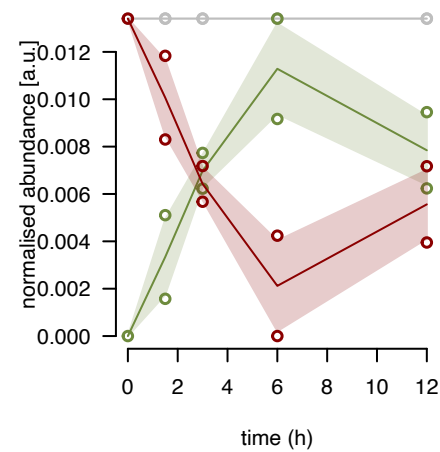**uS12m fraction 5**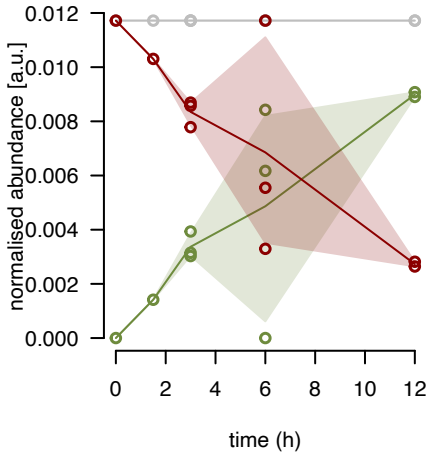**uS12m fraction 6**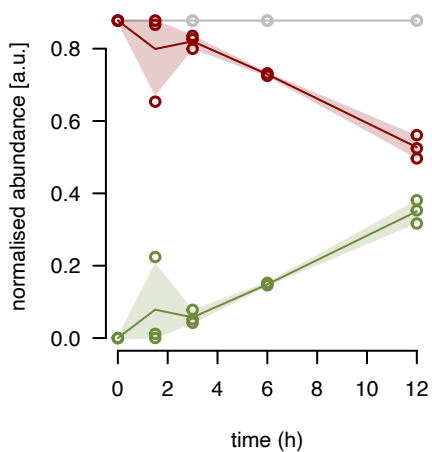**uS12m fraction 7**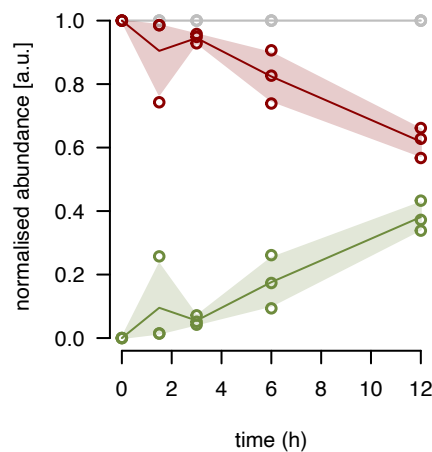**uS12m fraction 8**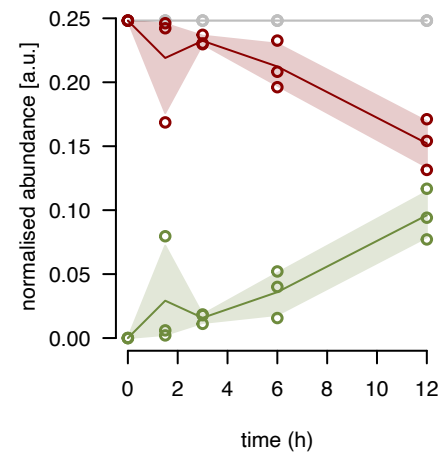**uS12m fraction 9**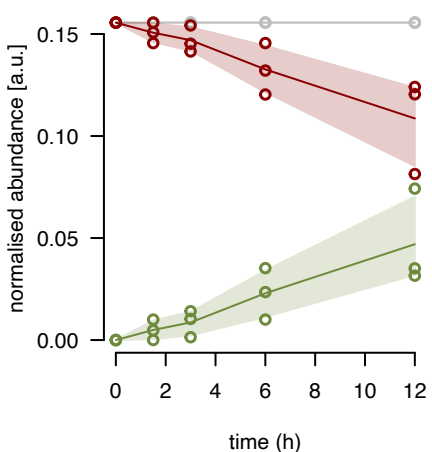**uS12m fraction 10**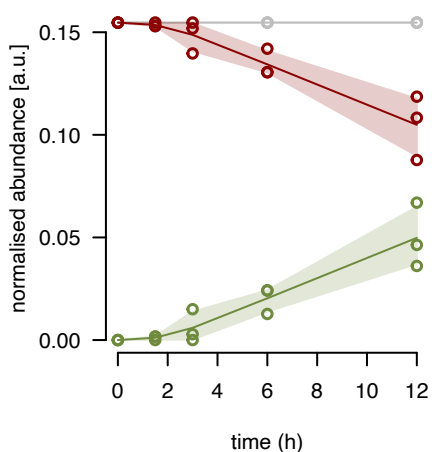**uS12m fraction 11**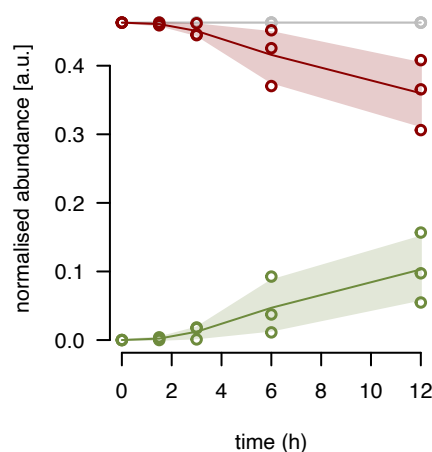**uS12m fraction 12**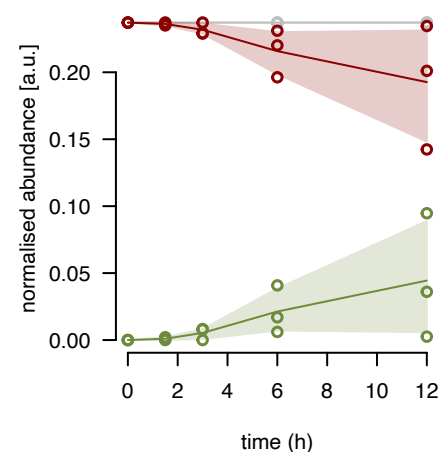**uS12m fraction 13**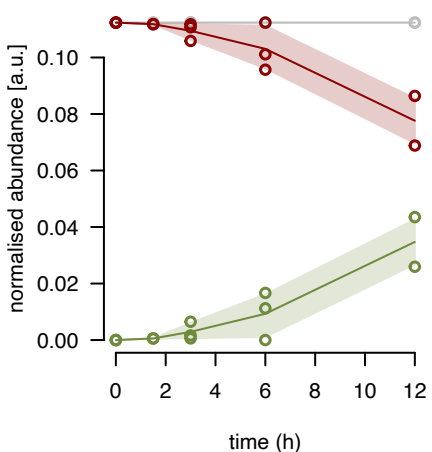**uS12m fraction 14**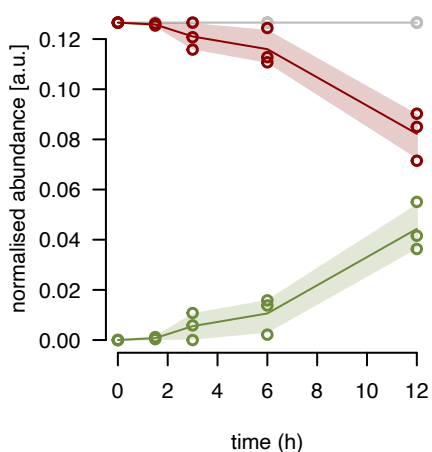**uS12m fraction 15**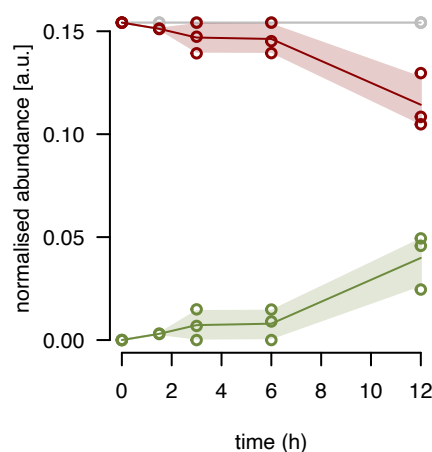**uS12m fraction 16**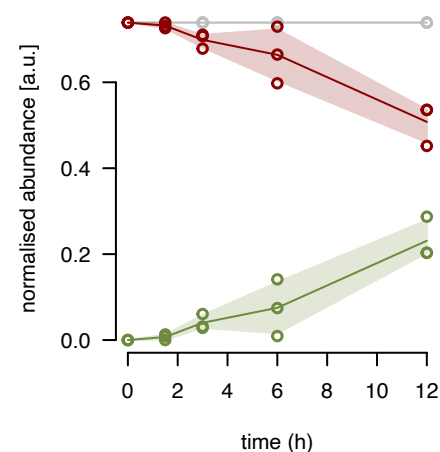

**uS14m fraction 1**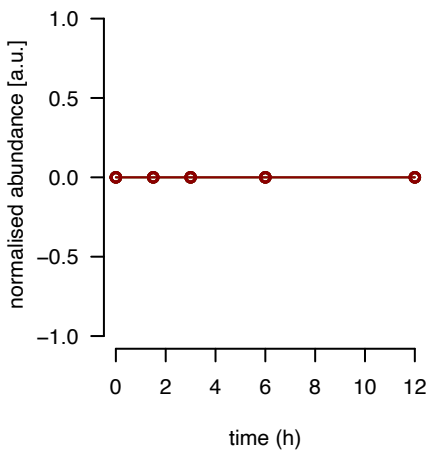**uS14m fraction 2**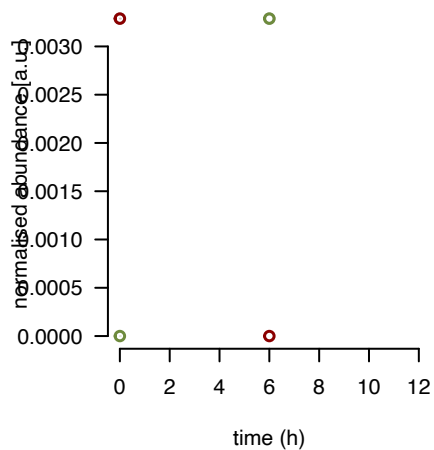**uS14m fraction 3**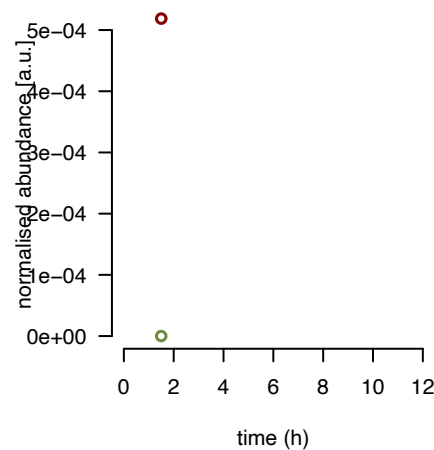**uS14m fraction 4**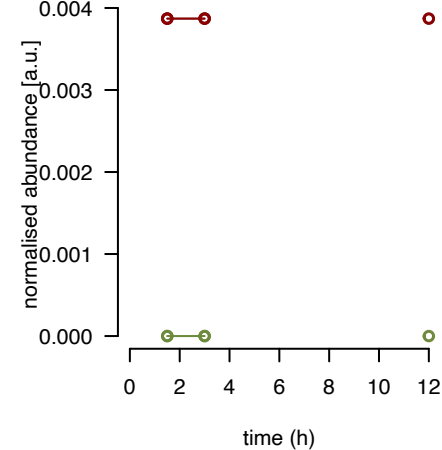**uS14m fraction 5**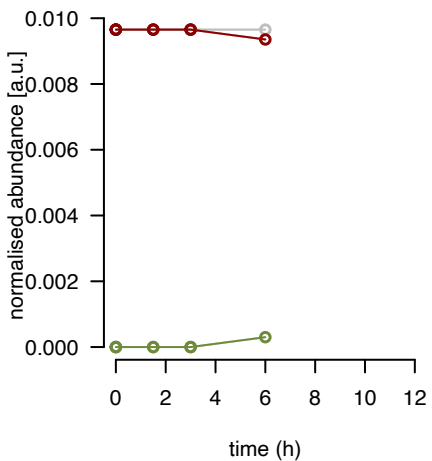**uS14m fraction 6**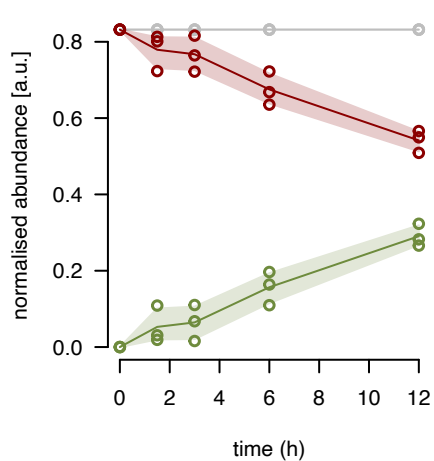**uS14m fraction 7**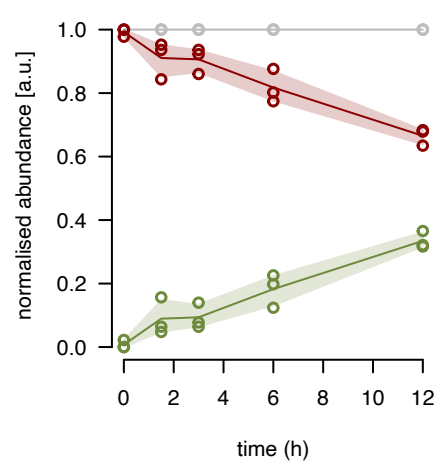**uS14m fraction 8**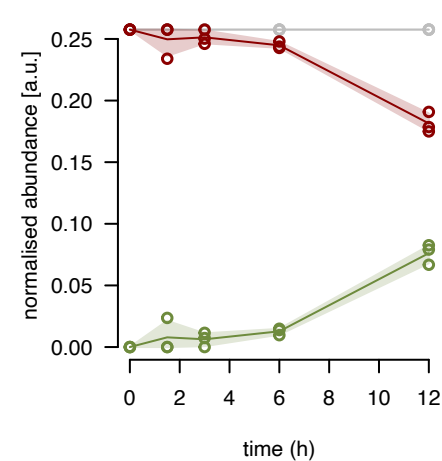**uS14m fraction 9**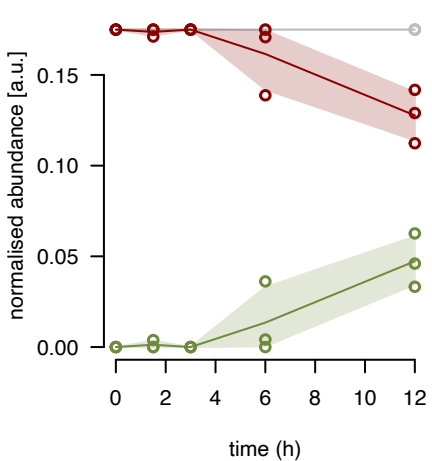**uS14m fraction 10**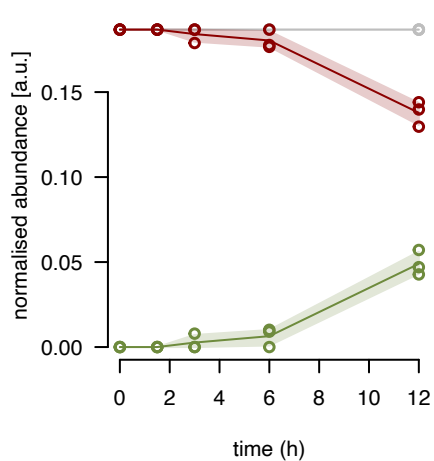**uS14m fraction 11**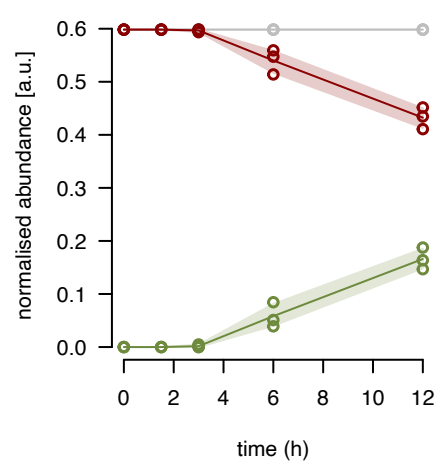**uS14m fraction 12**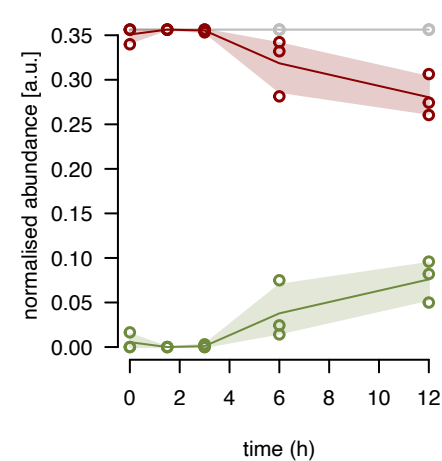**uS14m fraction 13**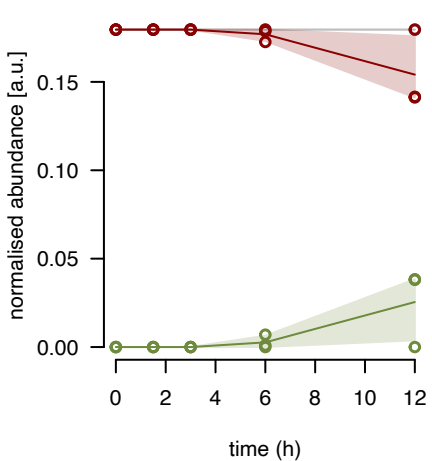**uS14m fraction 14**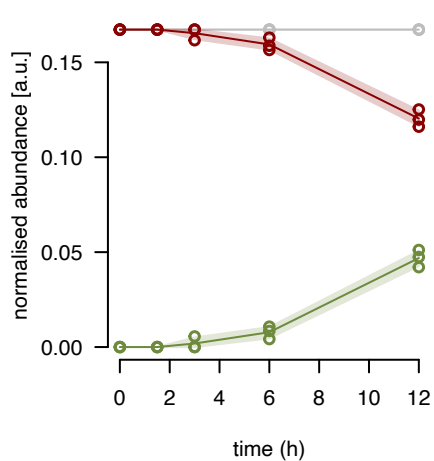**uS14m fraction 15**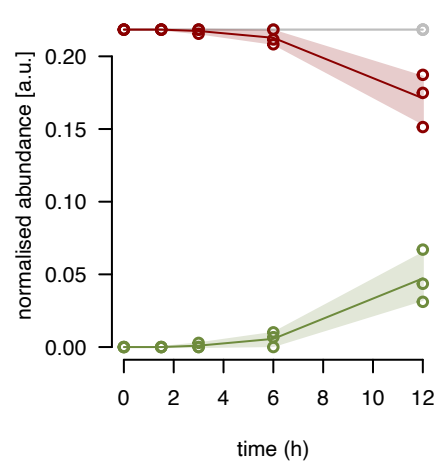**uS14m fraction 16**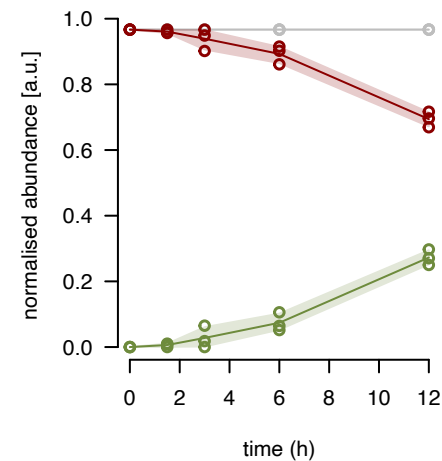

**uS15m fraction 1****uS15m fraction 2**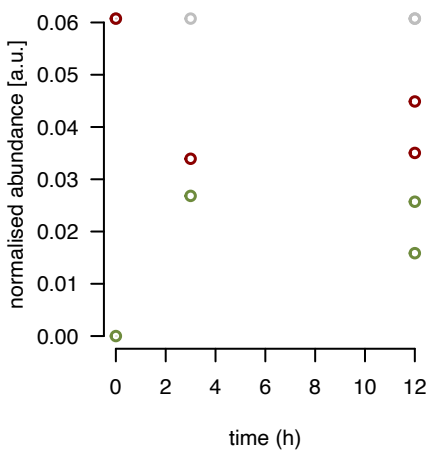**uS15m fraction 3**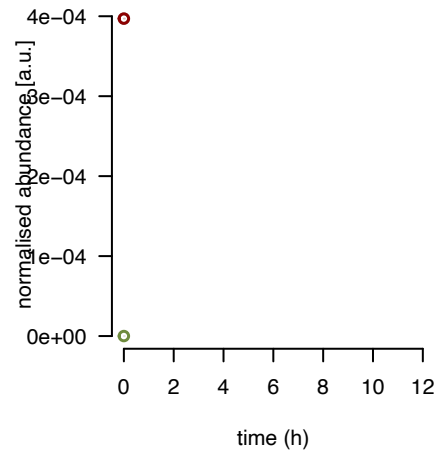**uS15m fraction 4**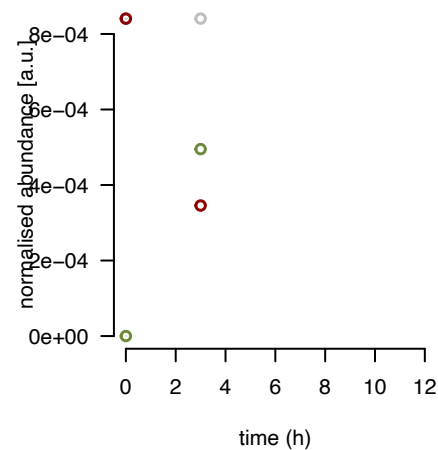**uS15m fraction 5**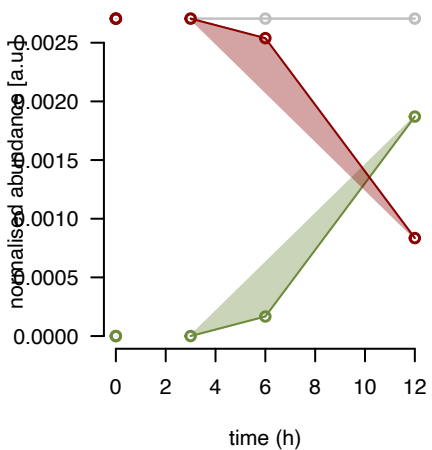**uS15m fraction 6**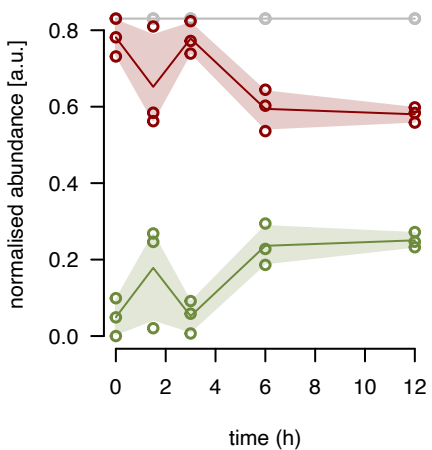**uS15m fraction 7**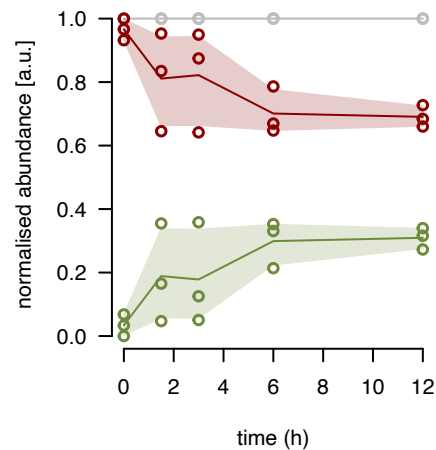**uS15m fraction 8**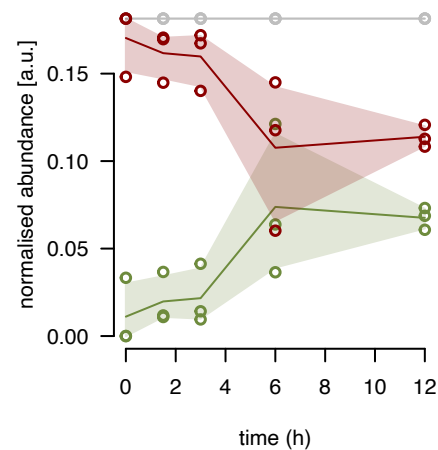**uS15m fraction 9**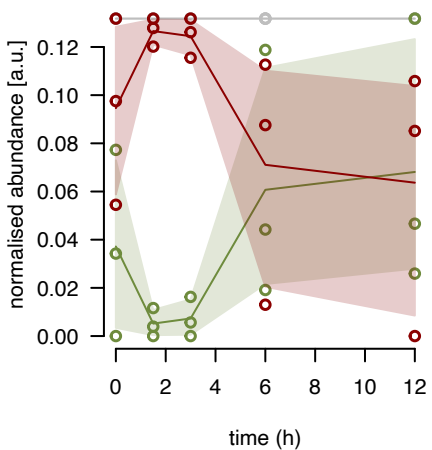**uS15m fraction 10**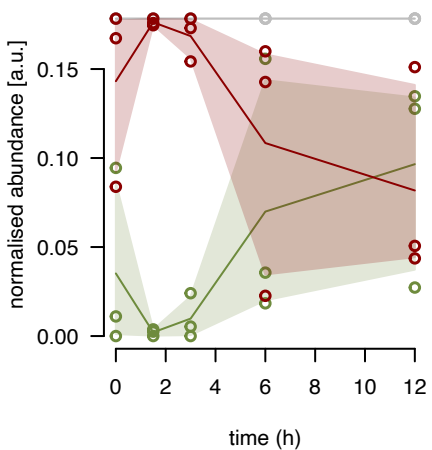**uS15m fraction 11**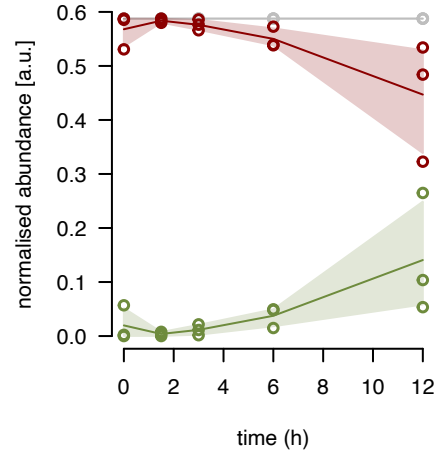**uS15m fraction 12**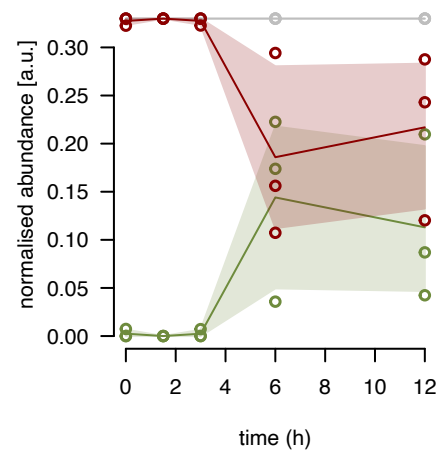**uS15m fraction 13**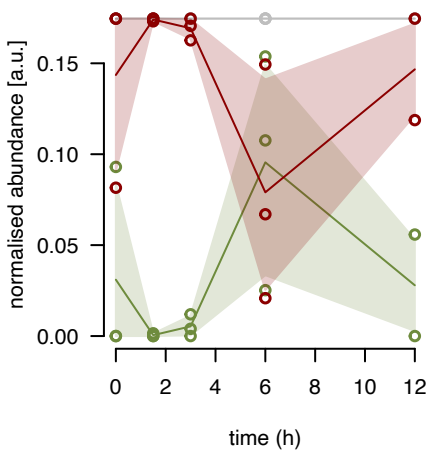**uS15m fraction 14**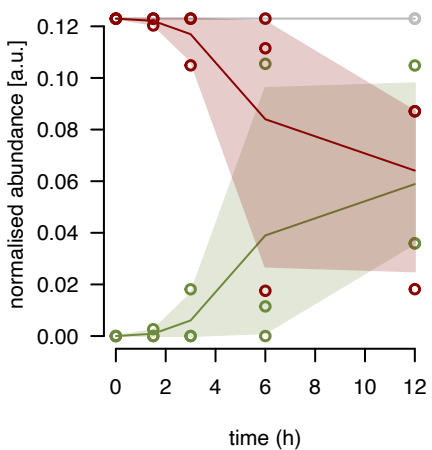**uS15m fraction 15**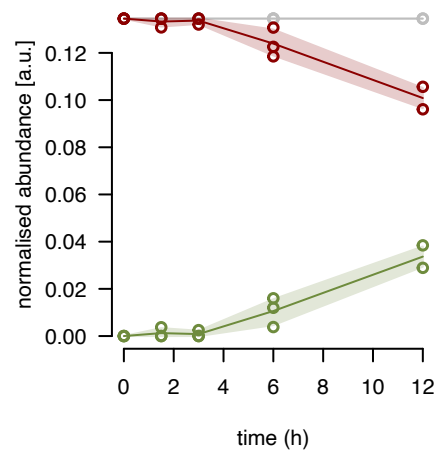**uS15m fraction 16**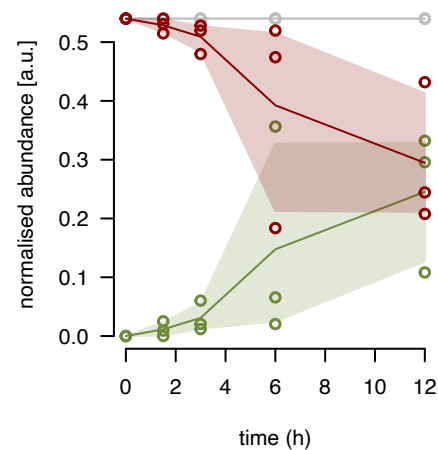

**bs16m fraction 1**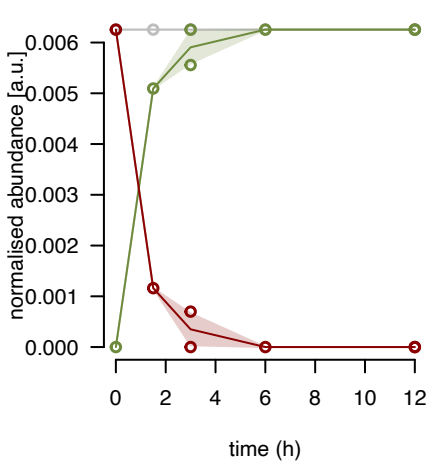**bs16m fraction 2**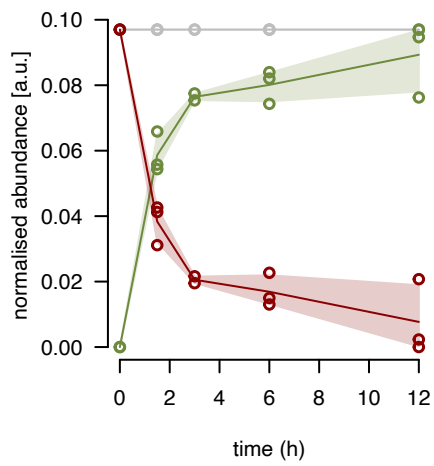**bs16m fraction 3**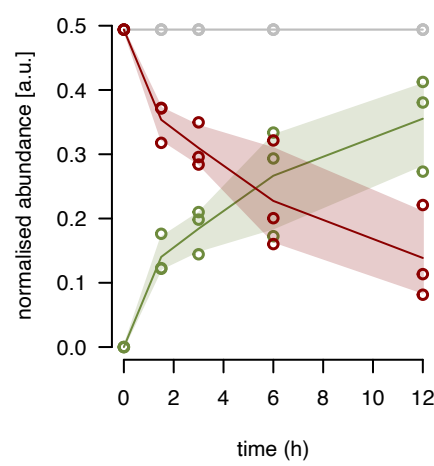**bs16m fraction 4**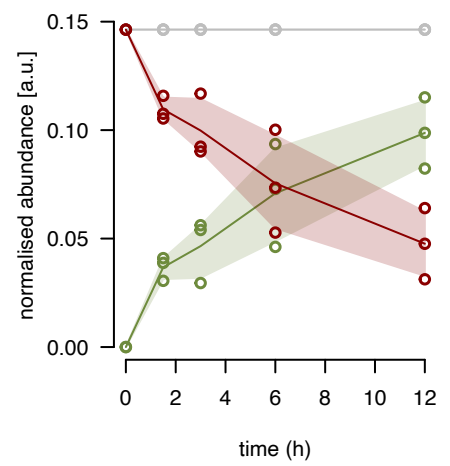**bs16m fraction 5**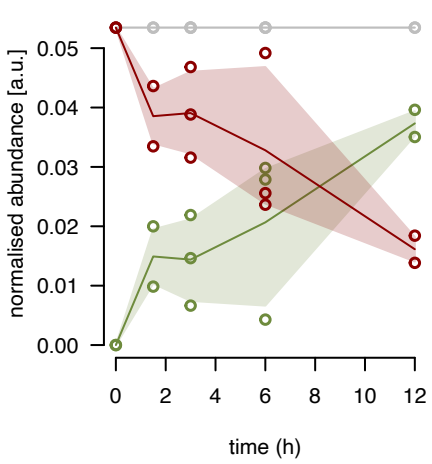**bs16m fraction 6**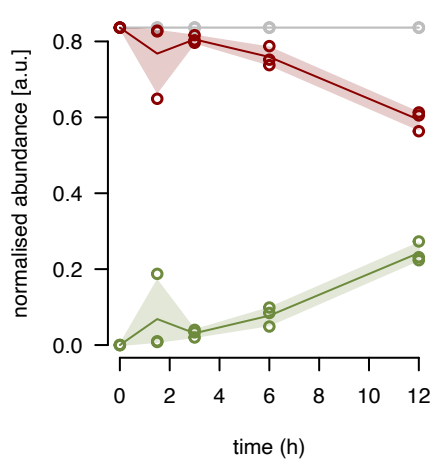**bs16m fraction 7**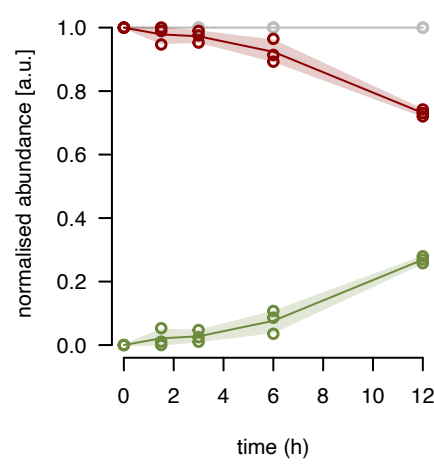**bs16m fraction 8**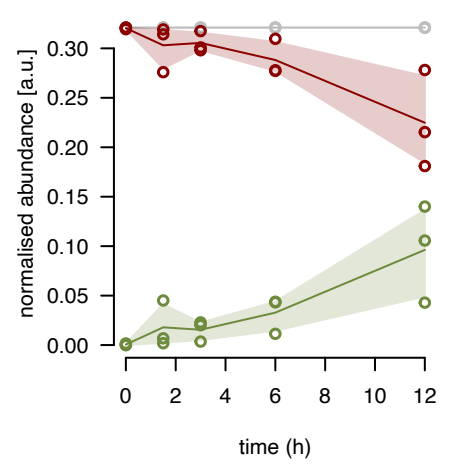**bs16m fraction 9**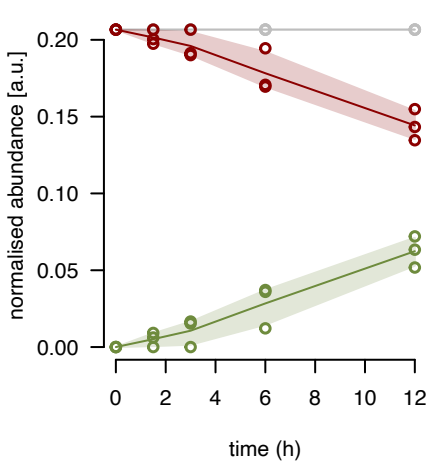**bs16m fraction 10**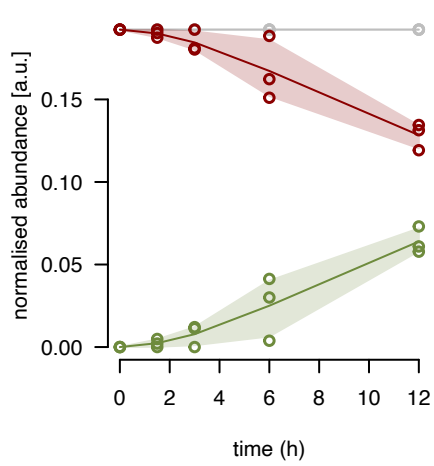**bs16m fraction 11**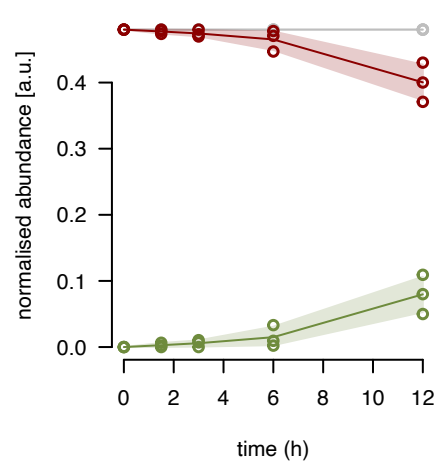**bs16m fraction 12**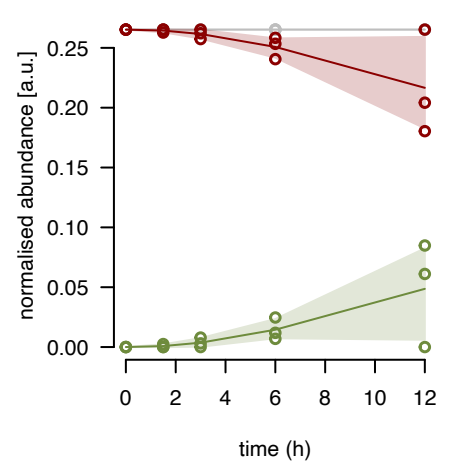**bs16m fraction 13**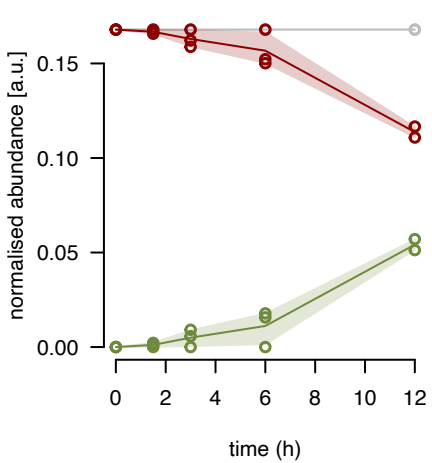**bs16m fraction 14**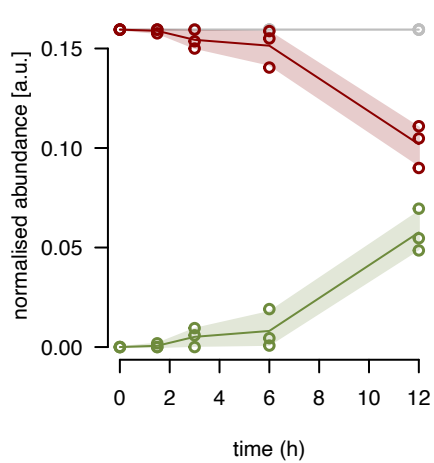**bs16m fraction 15**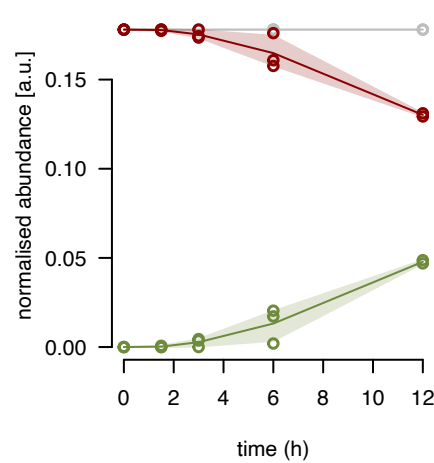**bs16m fraction 16**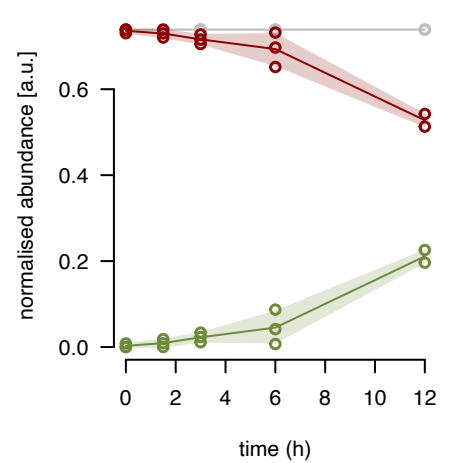

**uS17m fraction 1****uS17m fraction 2**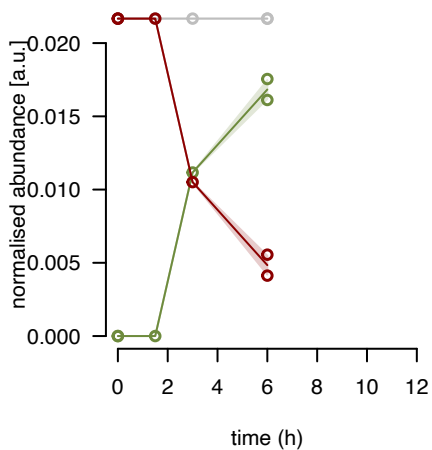**uS17m fraction 3**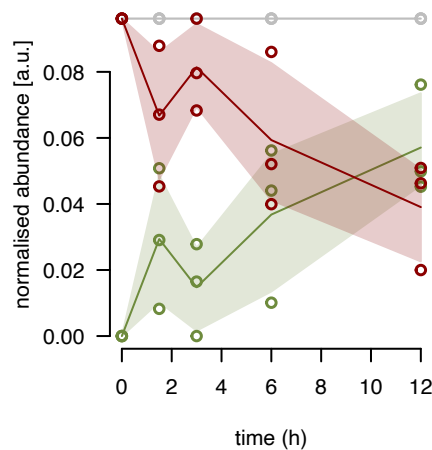**uS17m fraction 4**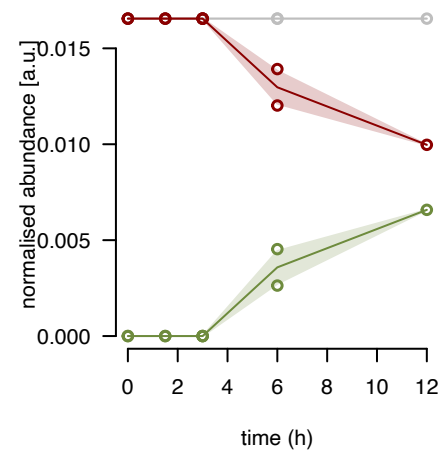**uS17m fraction 5**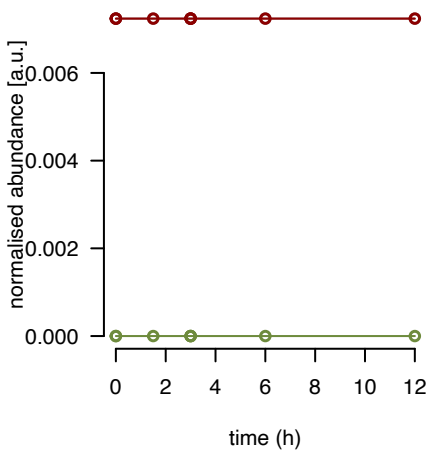**uS17m fraction 6**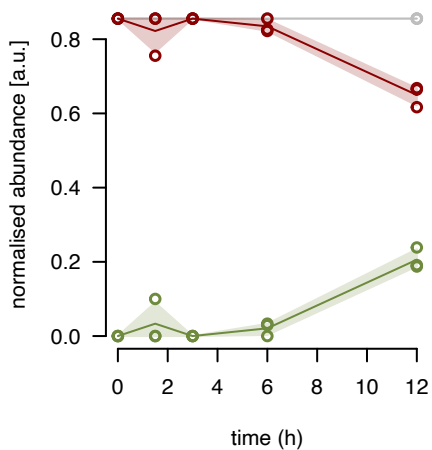**uS17m fraction 7**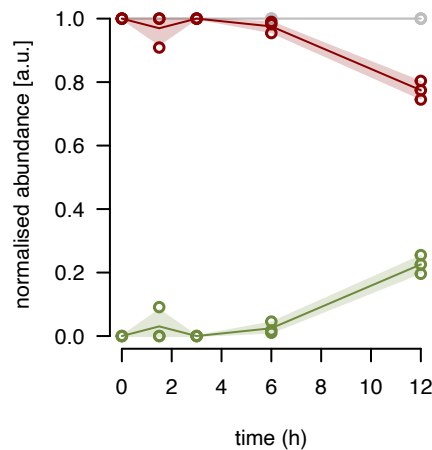**uS17m fraction 8**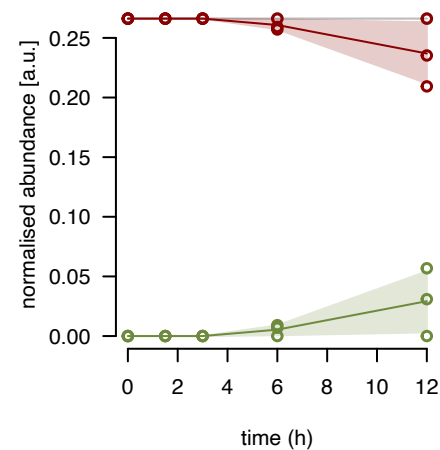**uS17m fraction 9**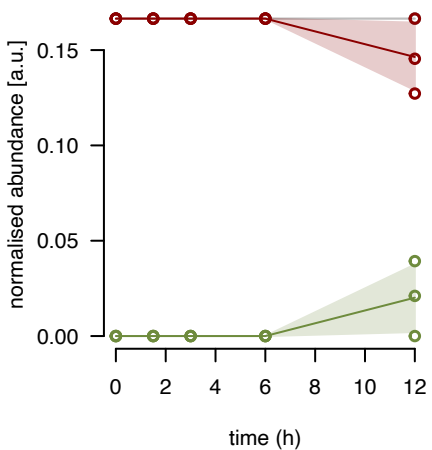**uS17m fraction 10**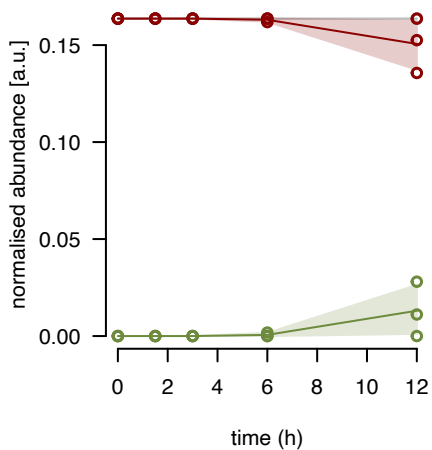**uS17m fraction 11**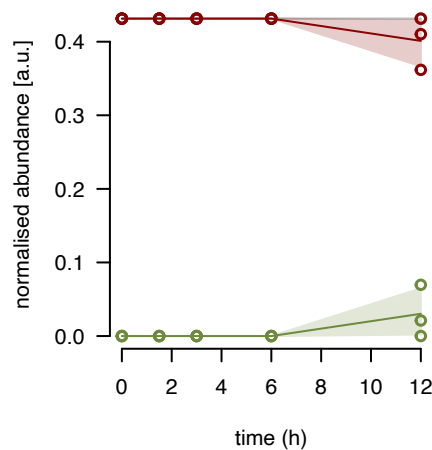**uS17m fraction 12**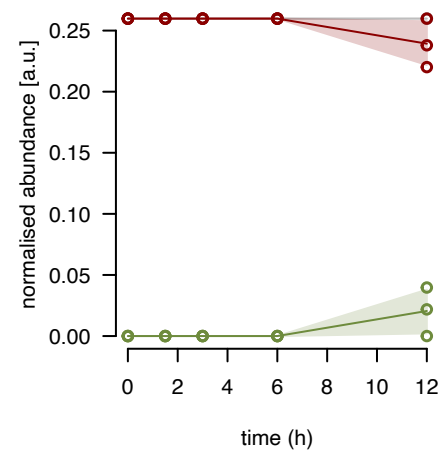**uS17m fraction 13**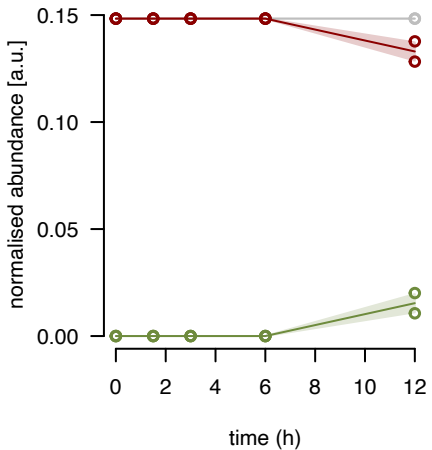**uS17m fraction 14**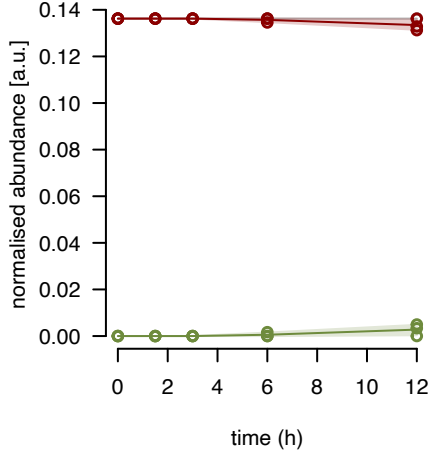**uS17m fraction 15**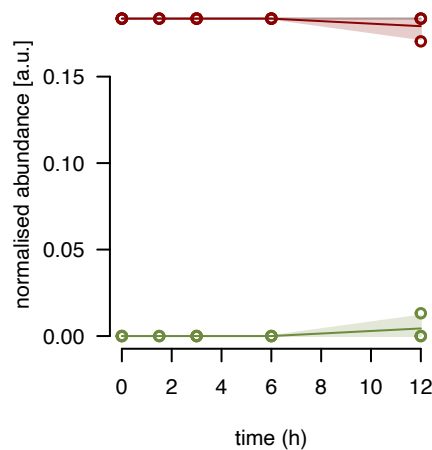**uS17m fraction 16**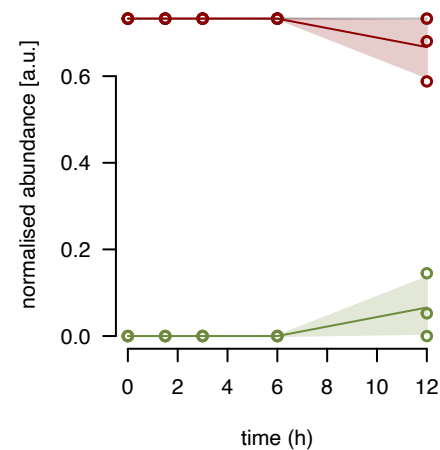

**bS18m fraction 1****bS18m fraction 2**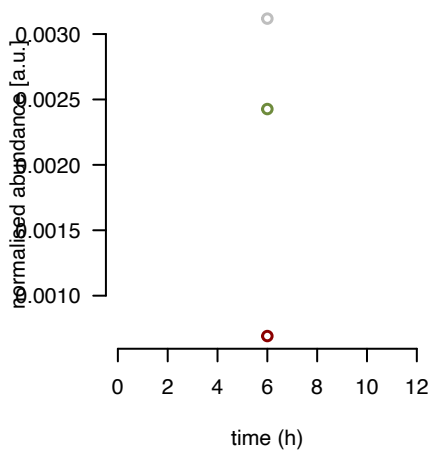**bS18m fraction 3**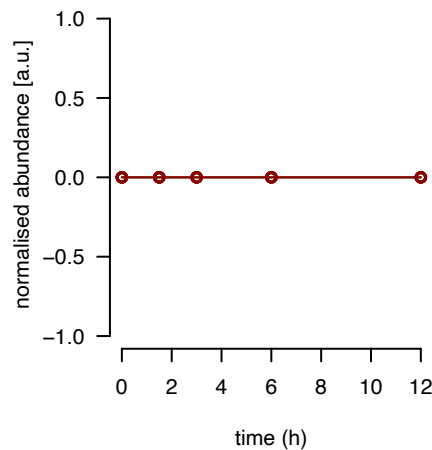**bS18m fraction 4**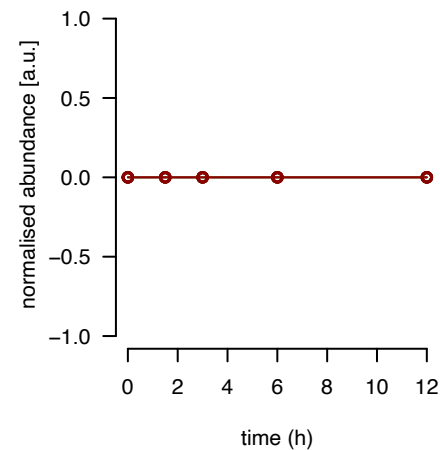**bS18m fraction 5**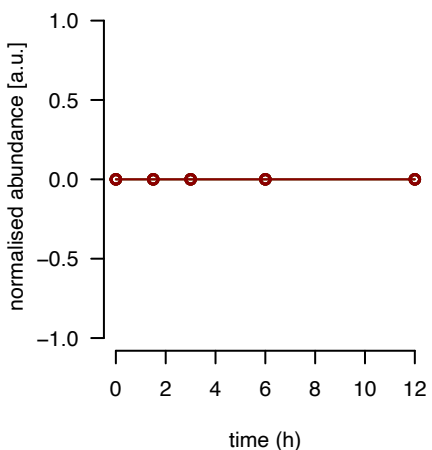**bS18m fraction 6**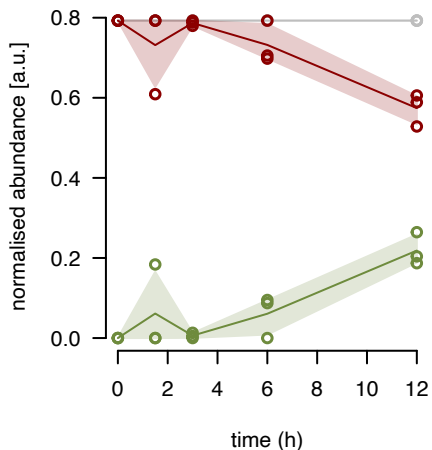**bS18m fraction 7**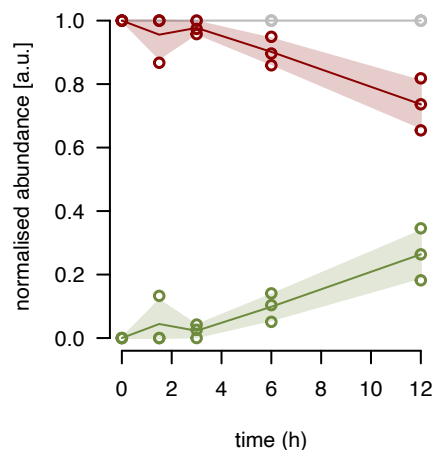**bS18m fraction 8**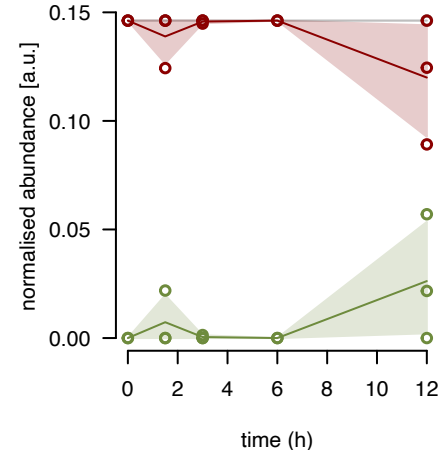**bS18m fraction 9**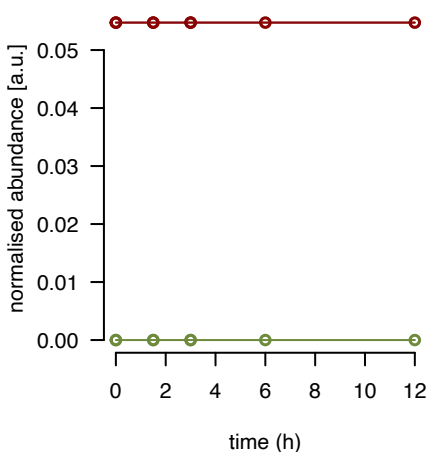**bS18m fraction 10**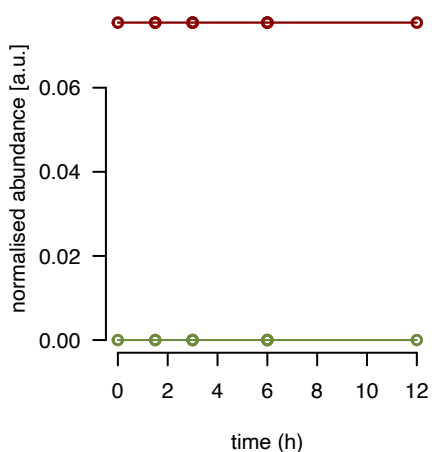**bS18m fraction 11**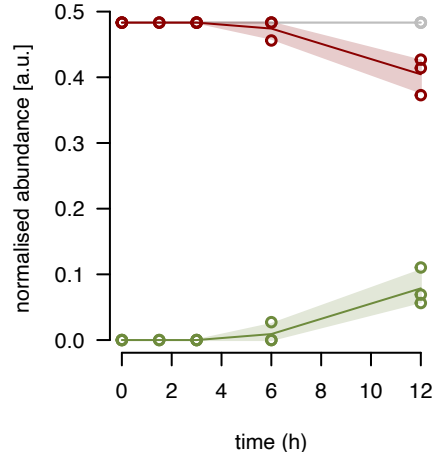**bS18m fraction 12**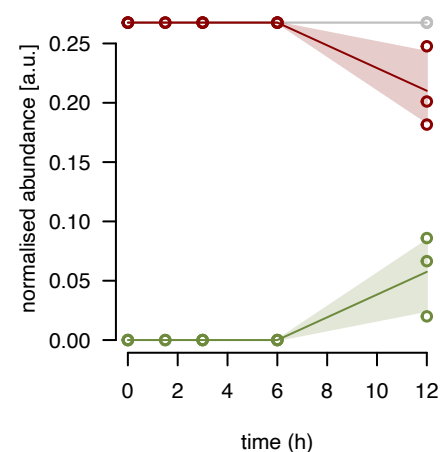**bS18m fraction 13**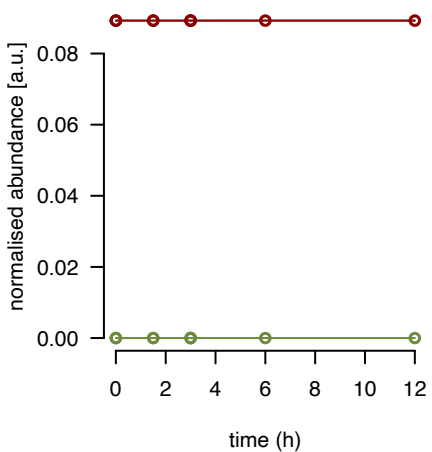**bS18m fraction 14**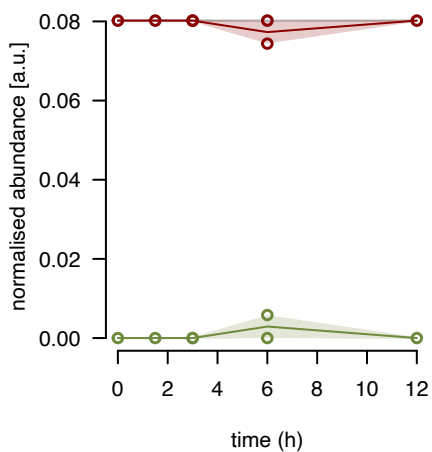**bS18m fraction 15**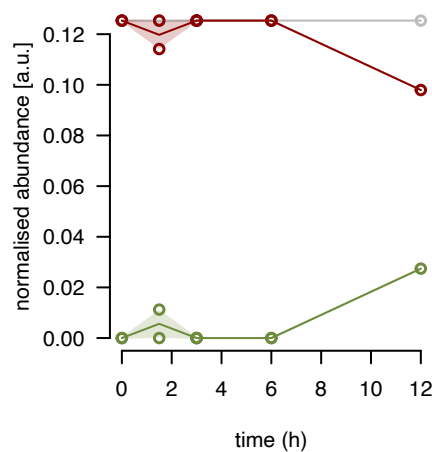**bS18m fraction 16**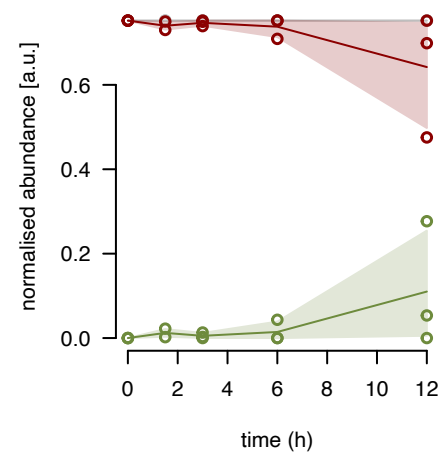

**bs21m fraction 1****bs21m fraction 2**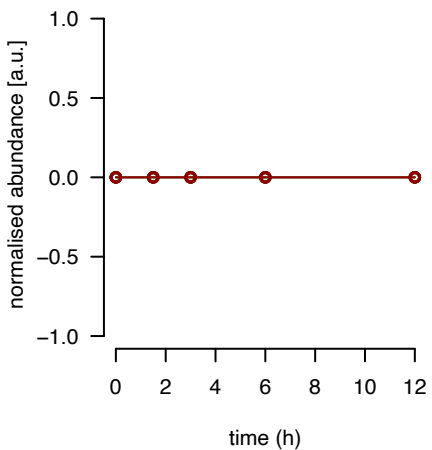**bs21m fraction 3**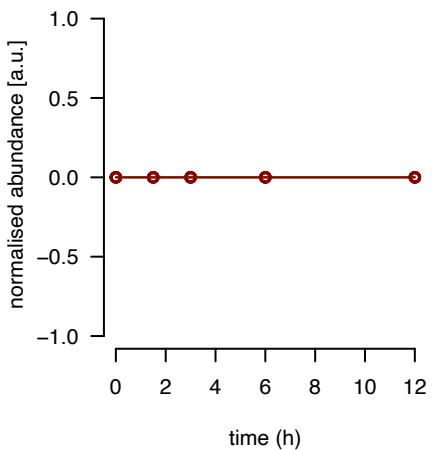**bs21m fraction 4**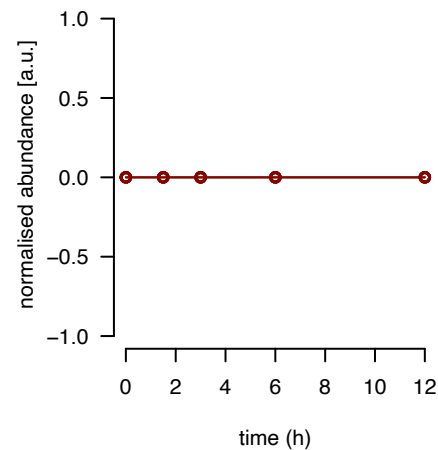**bs21m fraction 5**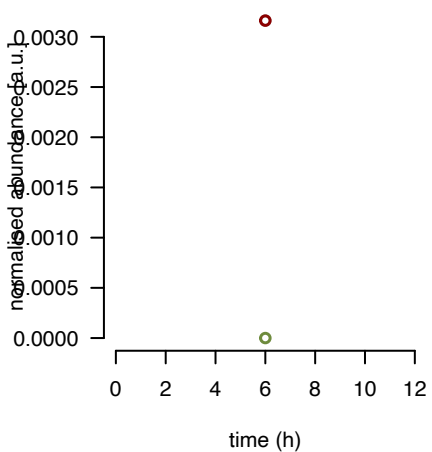**bs21m fraction 6**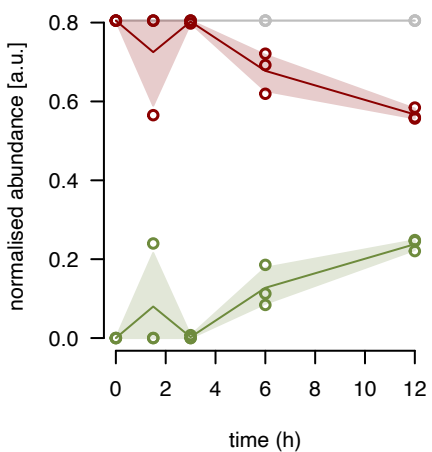**bs21m fraction 7**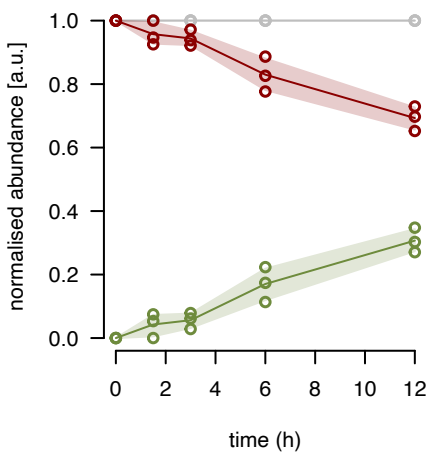**bs21m fraction 8**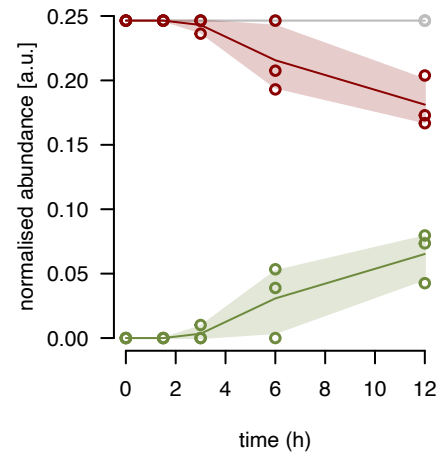**bs21m fraction 9**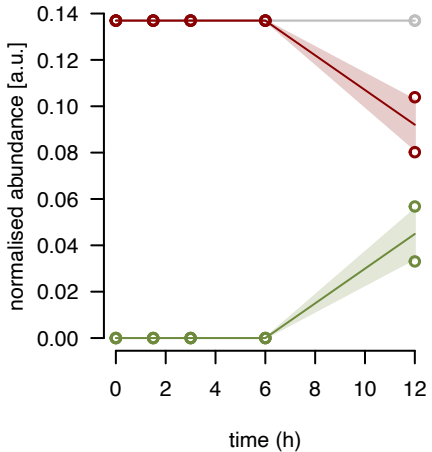**bs21m fraction 10**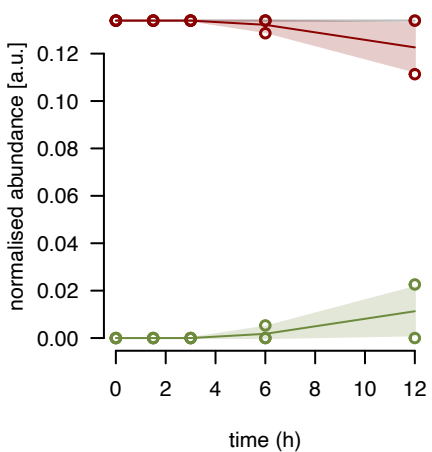**bs21m fraction 11**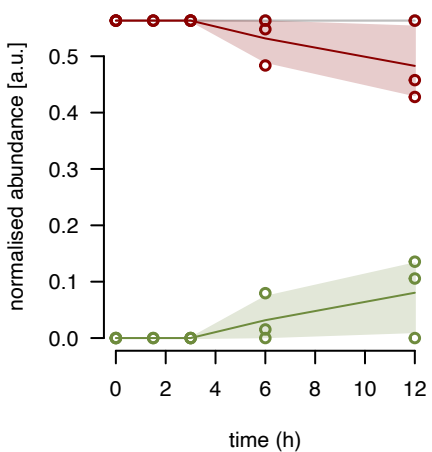**bs21m fraction 12**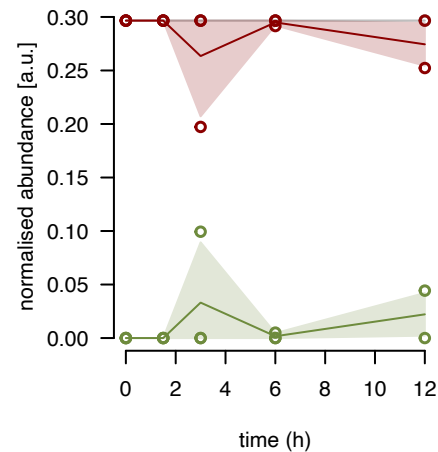**bs21m fraction 13**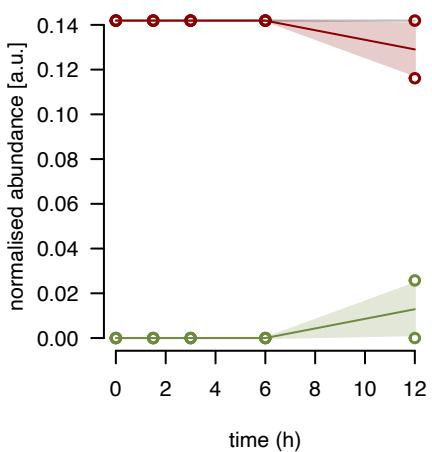**bs21m fraction 14**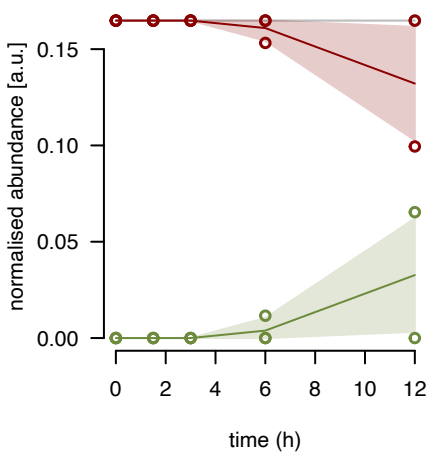**bs21m fraction 15**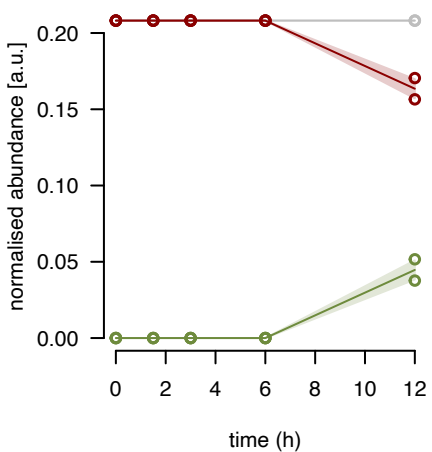**bs21m fraction 16**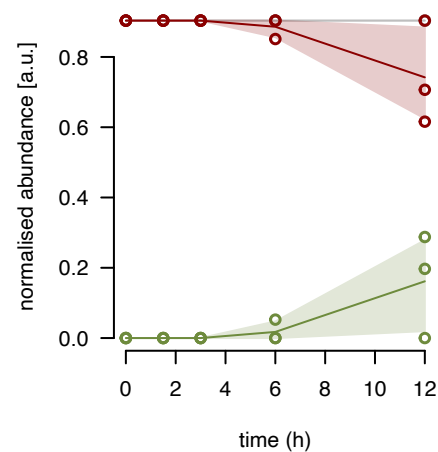



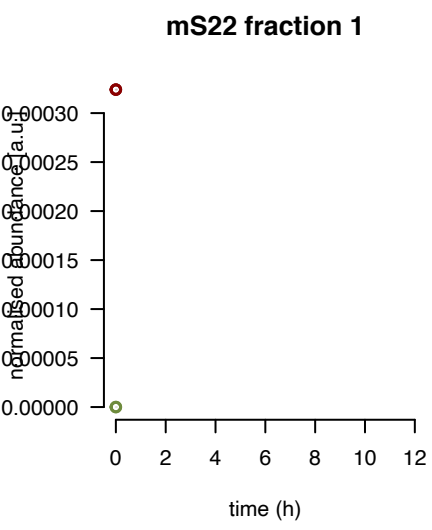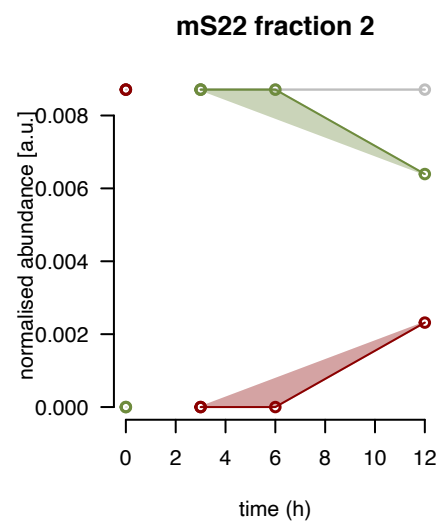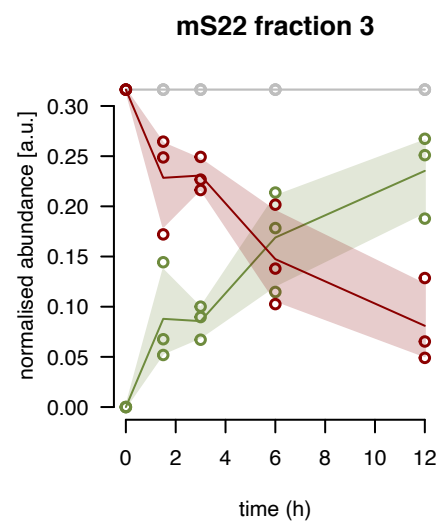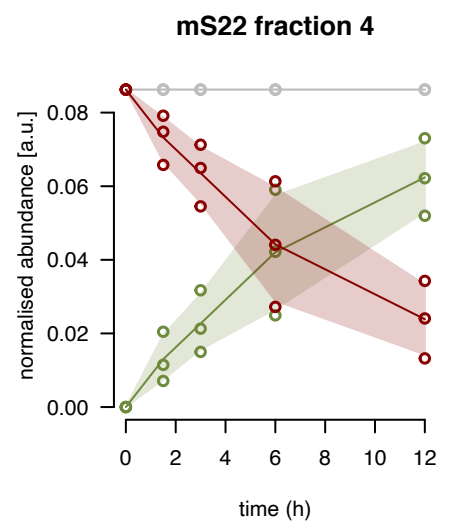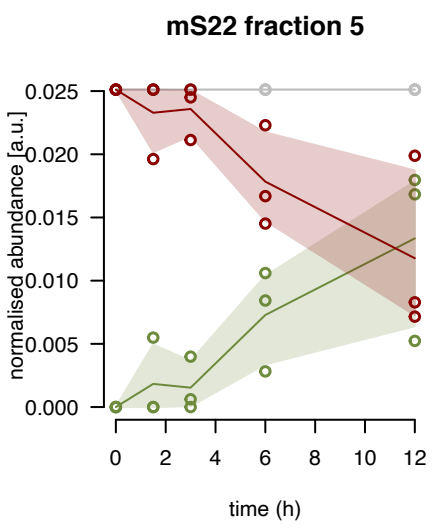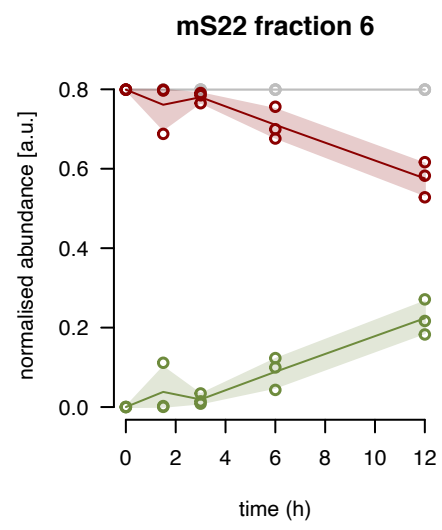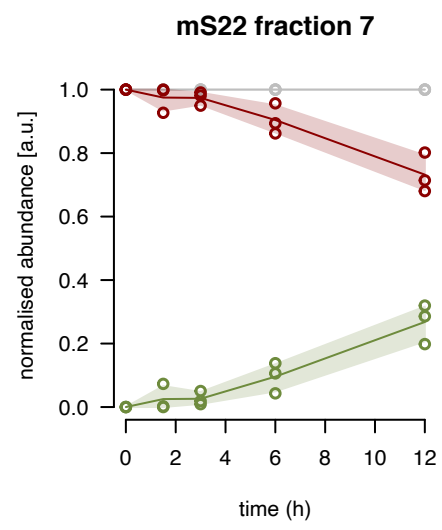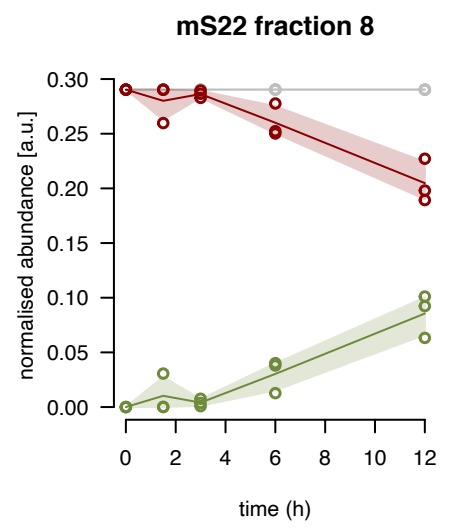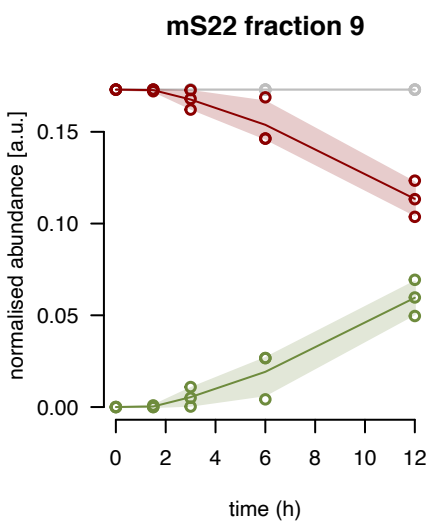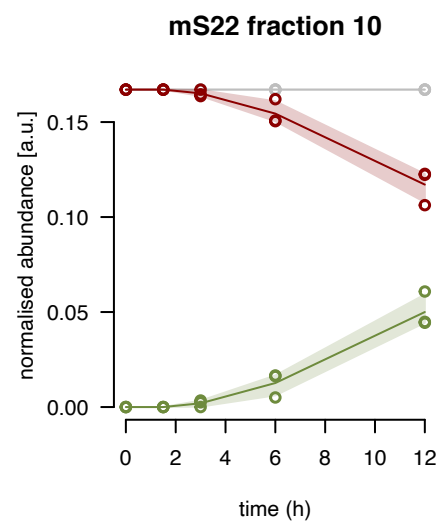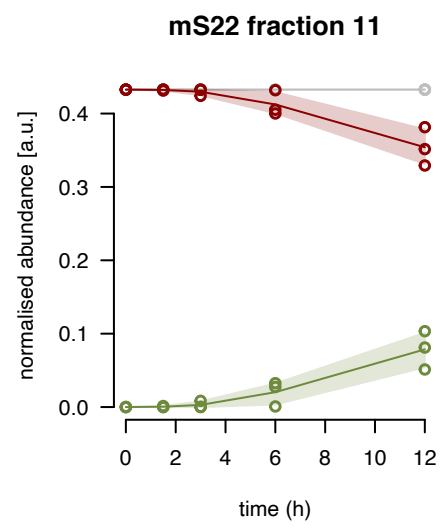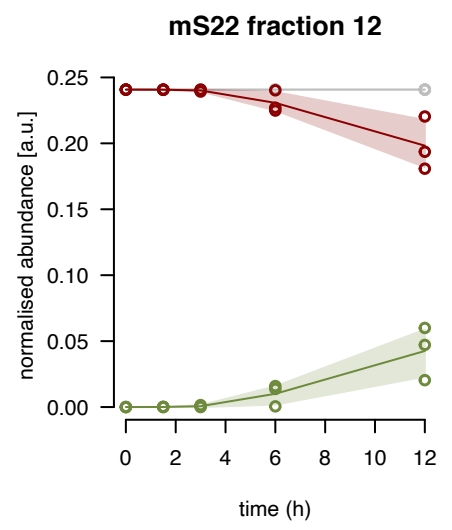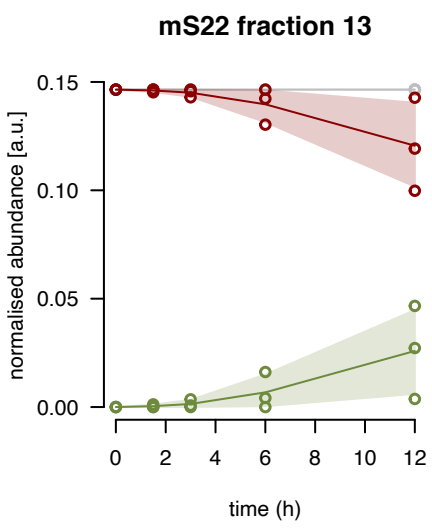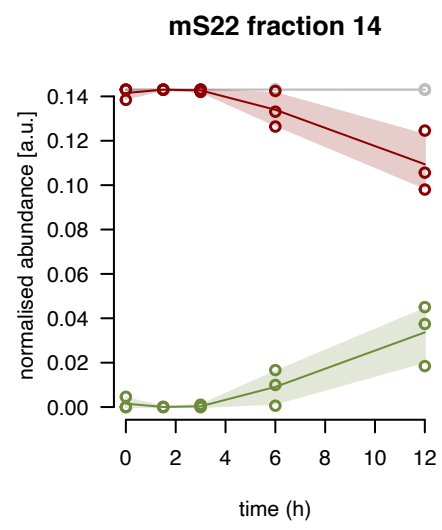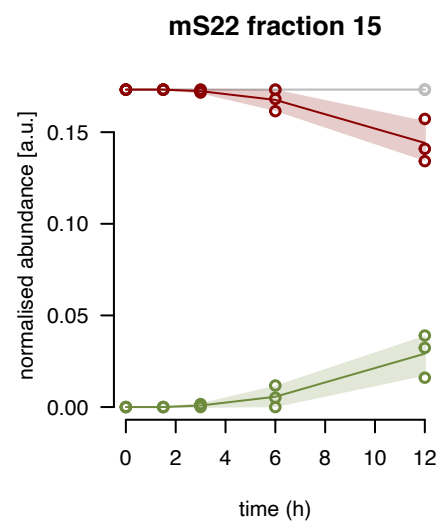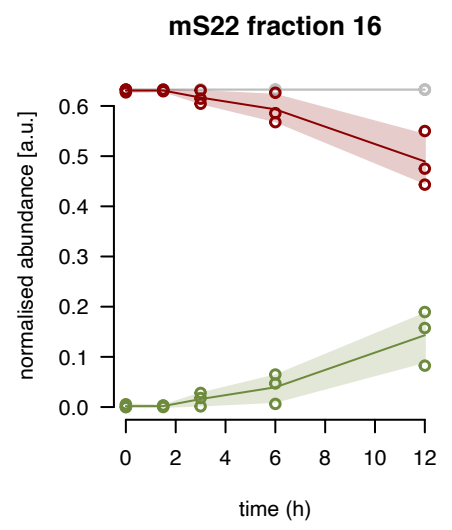

**mS23 fraction 1**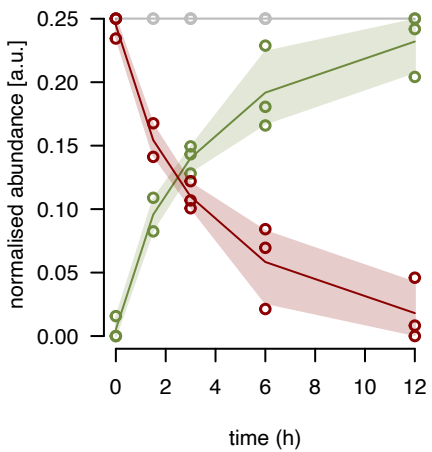**mS23 fraction 2**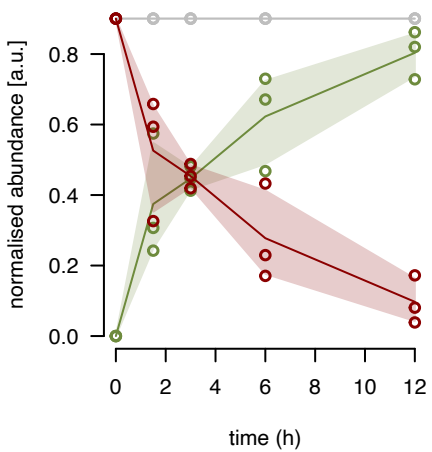**mS23 fraction 3**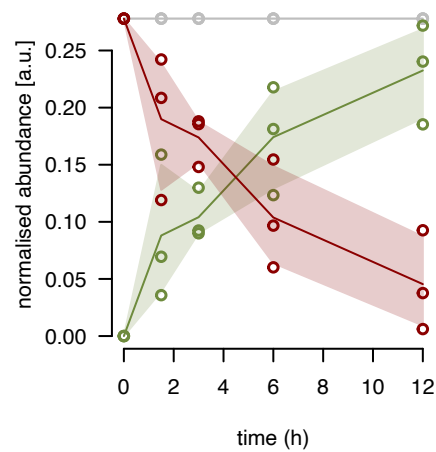**mS23 fraction 4**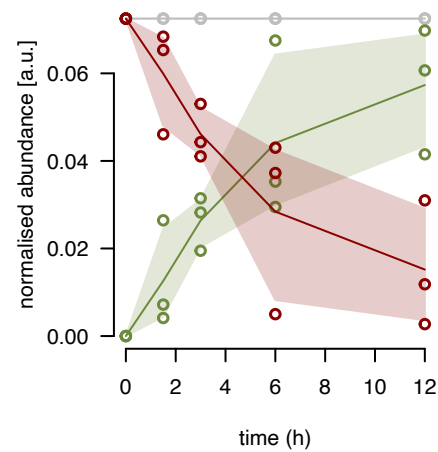**mS23 fraction 5**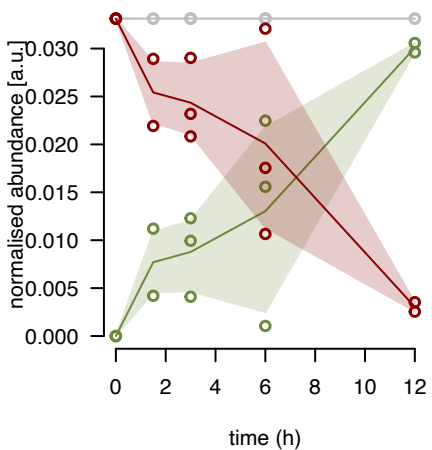**mS23 fraction 6**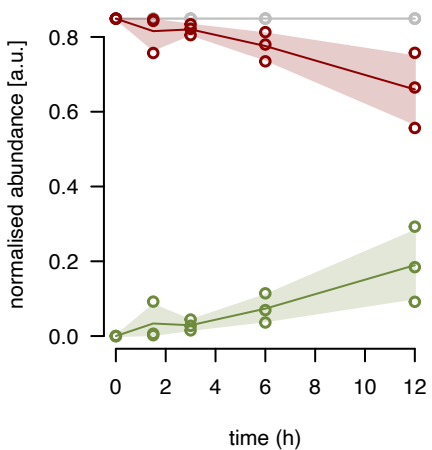**mS23 fraction 7**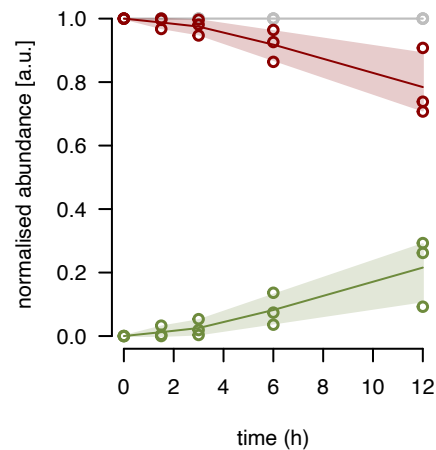**mS23 fraction 8**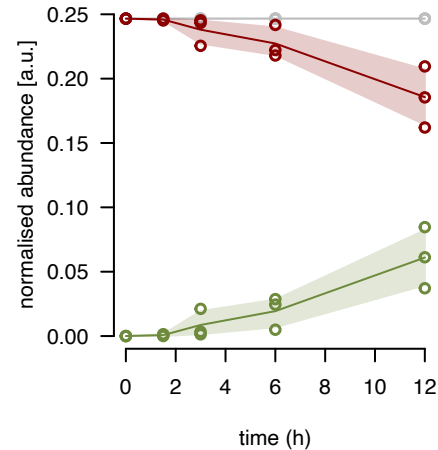**mS23 fraction 9**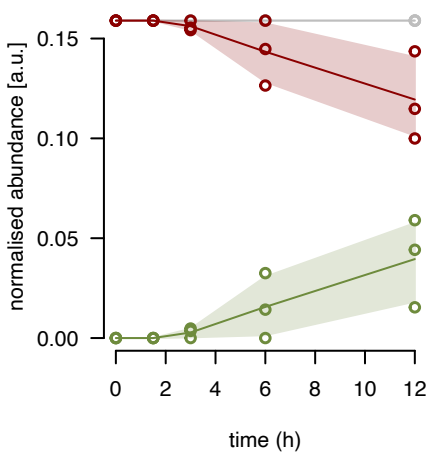**mS23 fraction 10**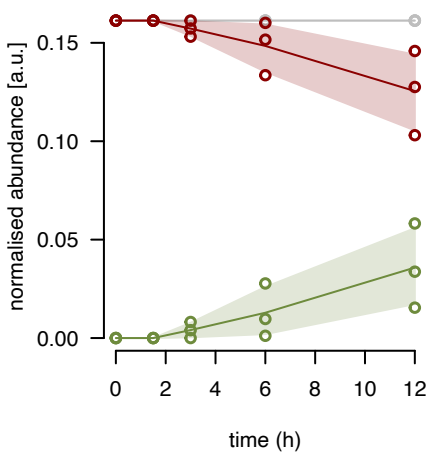**mS23 fraction 11**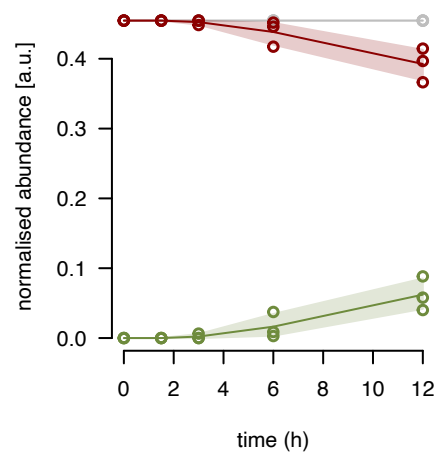**mS23 fraction 12**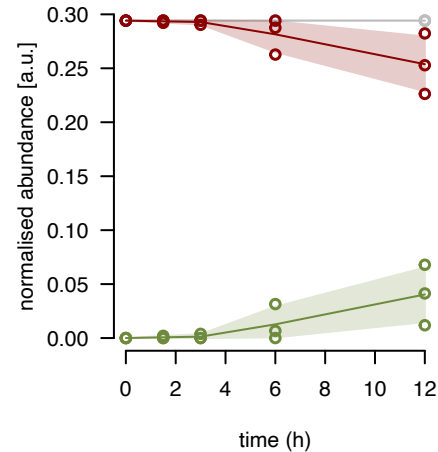**mS23 fraction 13**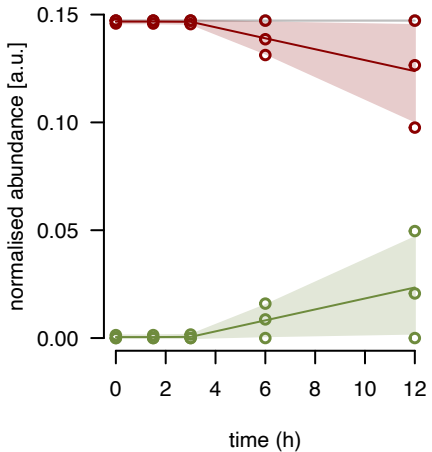**mS23 fraction 14**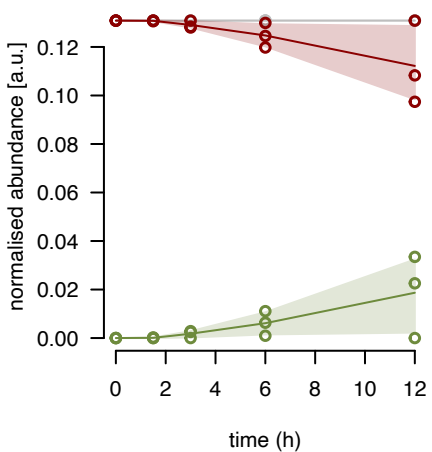**mS23 fraction 15**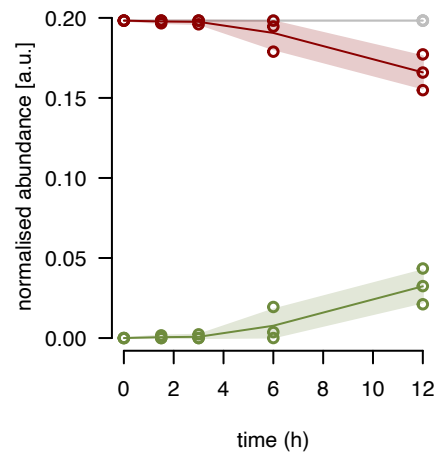**mS23 fraction 16**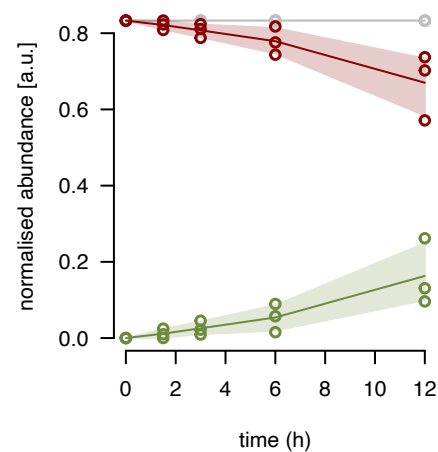

**mS25 fraction 1**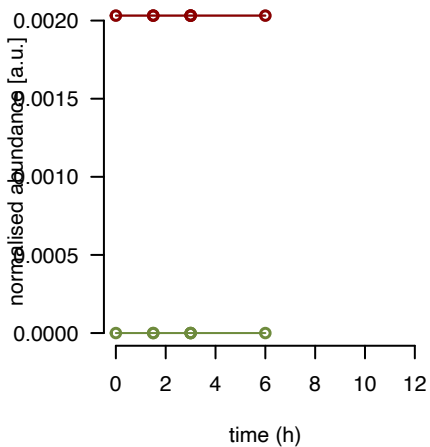**mS25 fraction 2**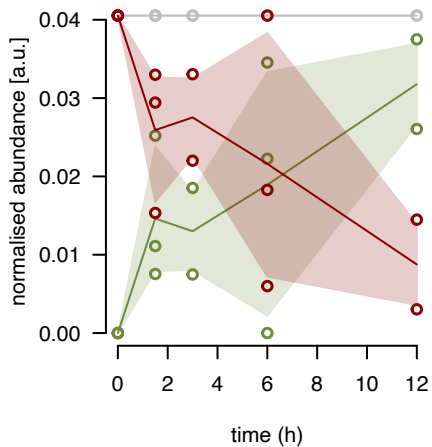**mS25 fraction 3**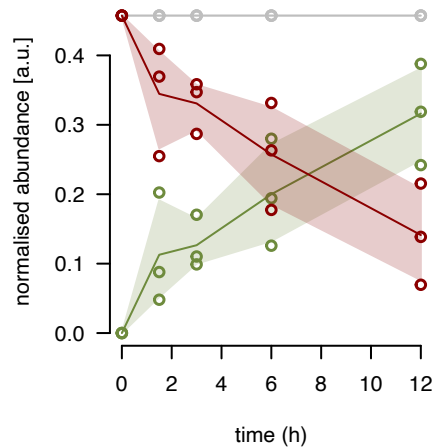**mS25 fraction 4**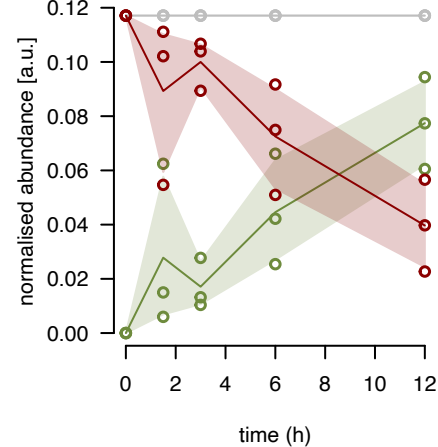**mS25 fraction 5**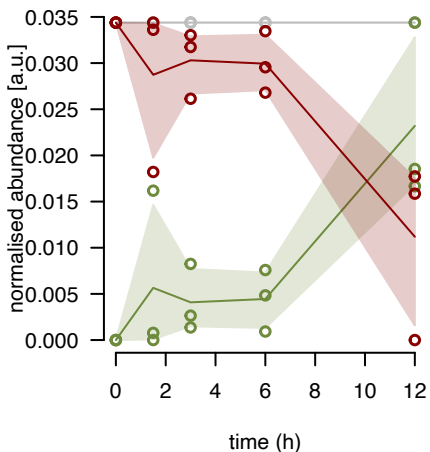**mS25 fraction 6**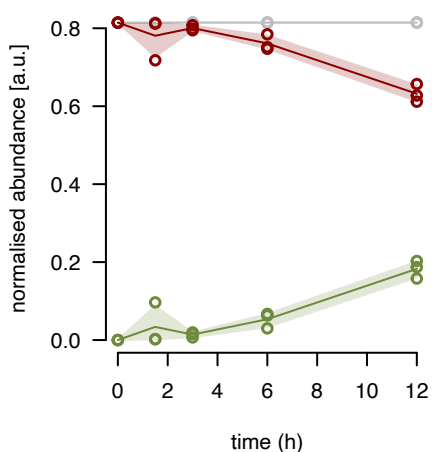**mS25 fraction 7**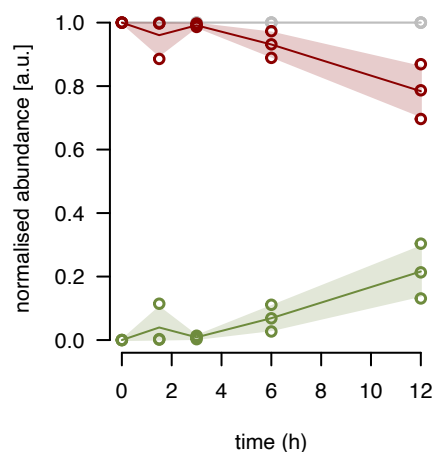**mS25 fraction 8**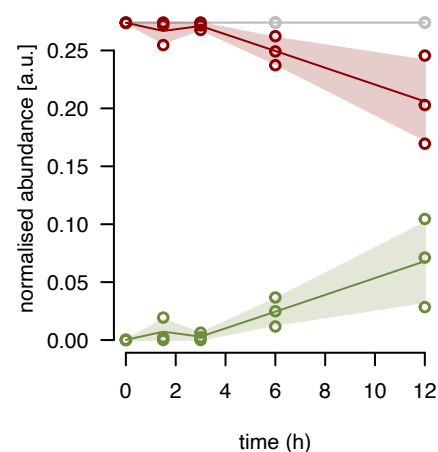**mS25 fraction 9**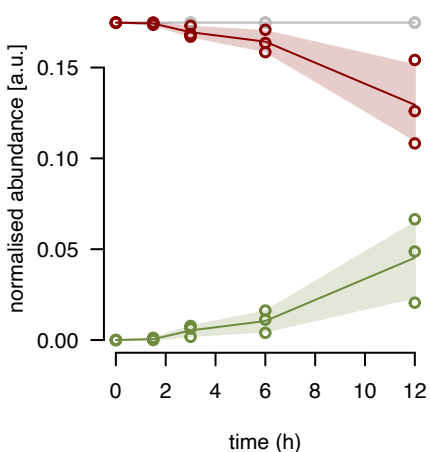**mS25 fraction 10**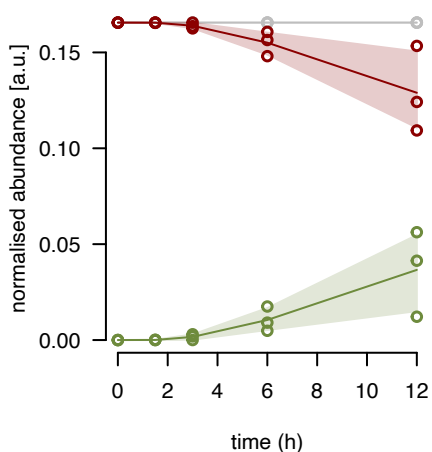**mS25 fraction 11**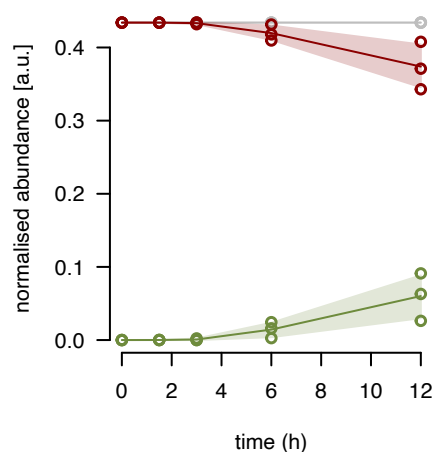**mS25 fraction 12**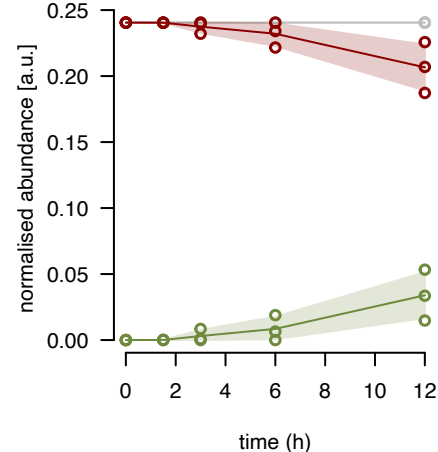**mS25 fraction 13**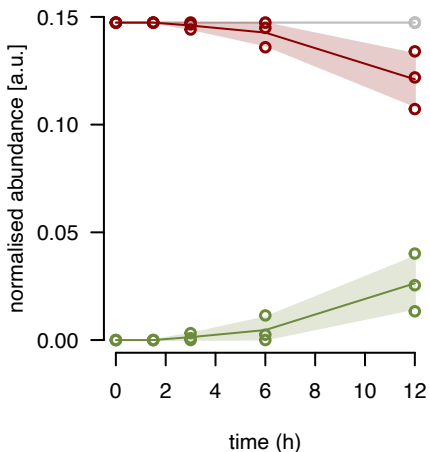**mS25 fraction 14**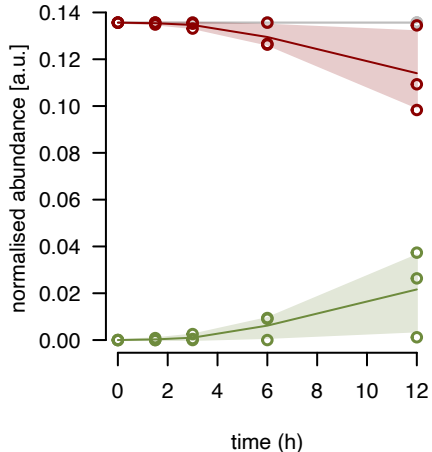**mS25 fraction 15**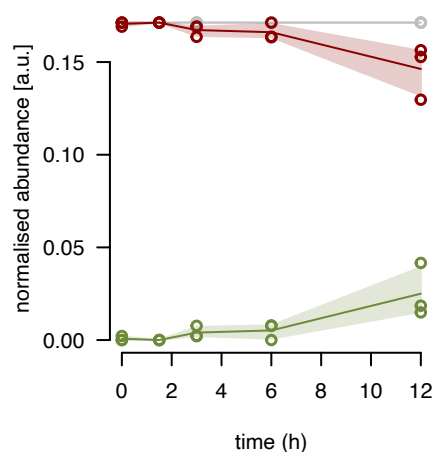**mS25 fraction 16**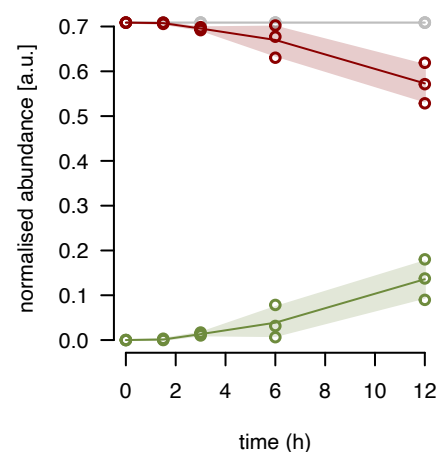

**mS26 fraction 1**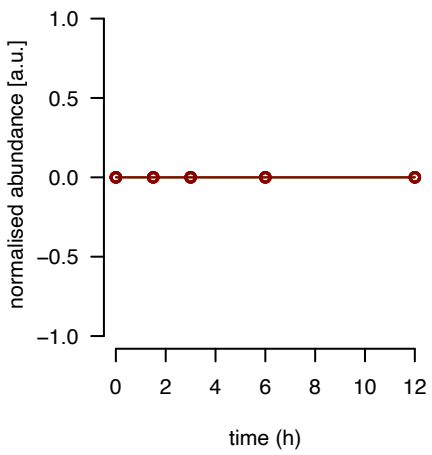**mS26 fraction 2**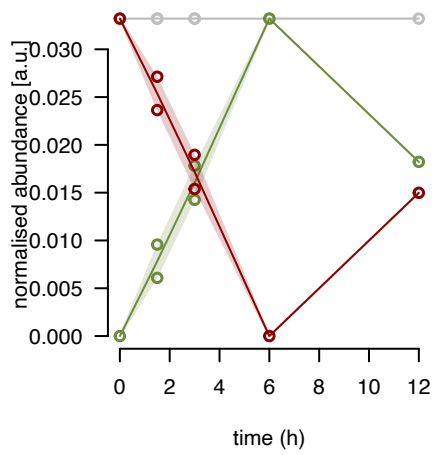**mS26 fraction 3**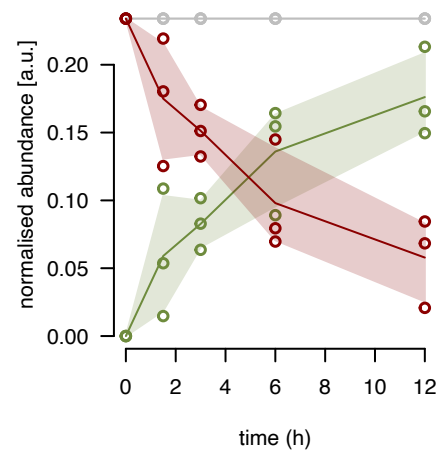**mS26 fraction 4**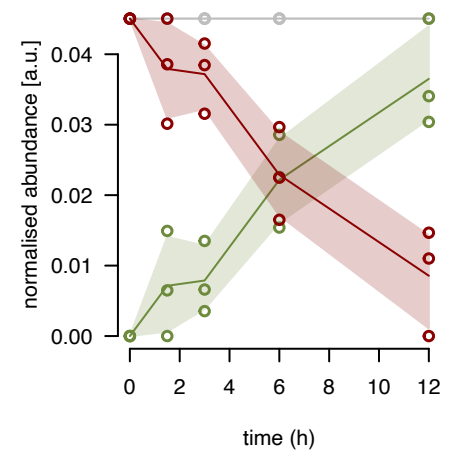**mS26 fraction 5**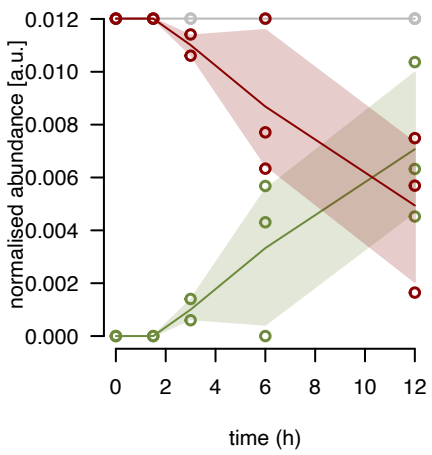**mS26 fraction 6**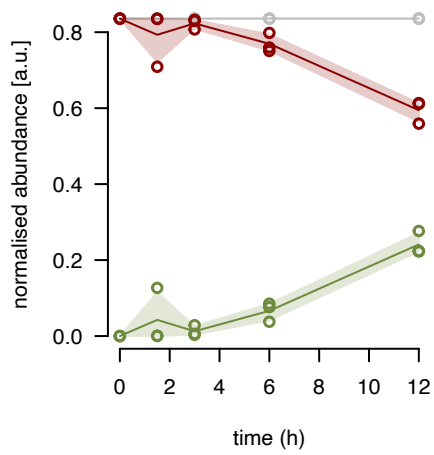**mS26 fraction 7**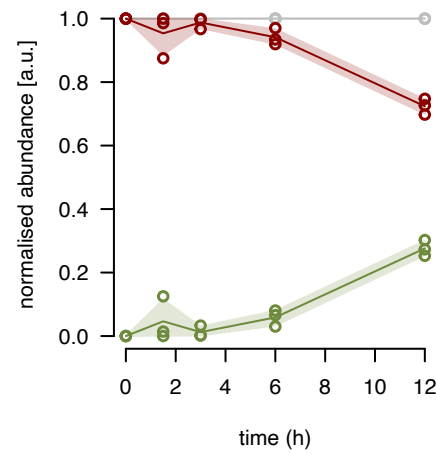**mS26 fraction 8**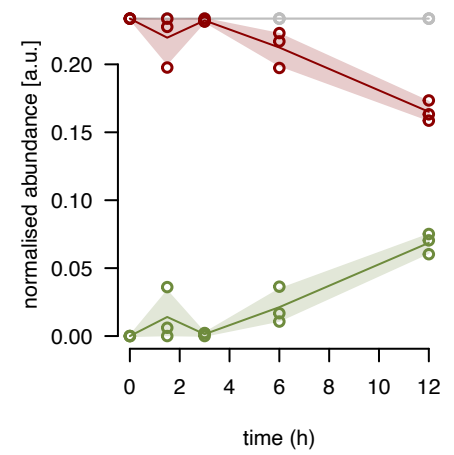**mS26 fraction 9**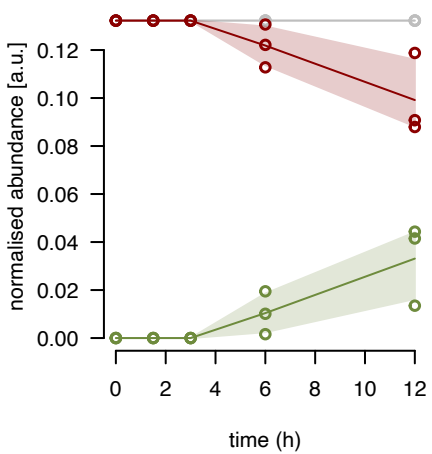**mS26 fraction 10**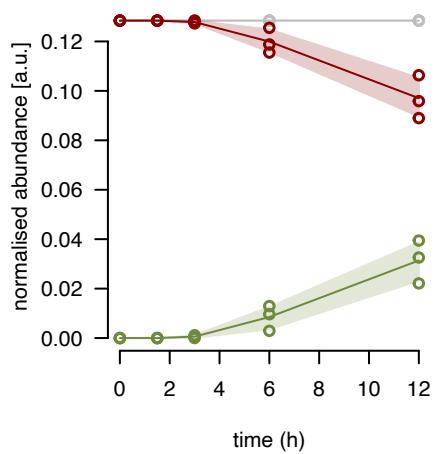**mS26 fraction 11**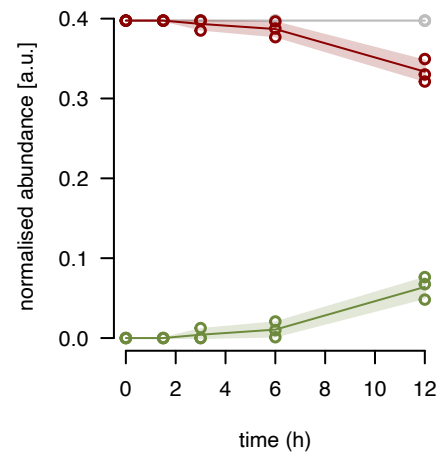**mS26 fraction 12**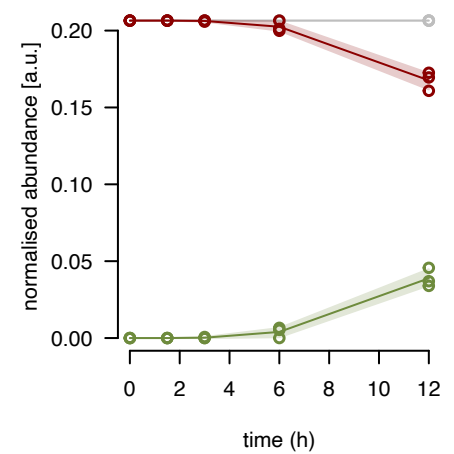**mS26 fraction 13**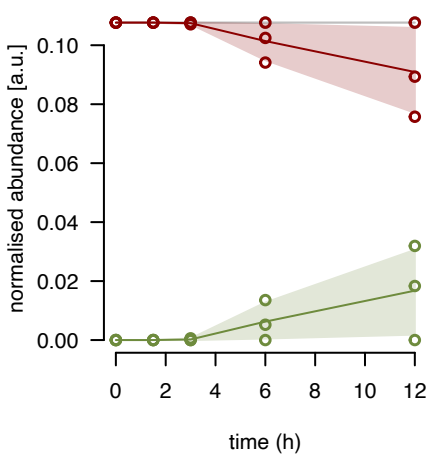**mS26 fraction 14**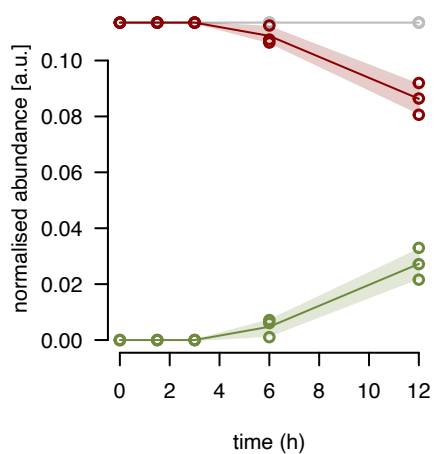**mS26 fraction 15**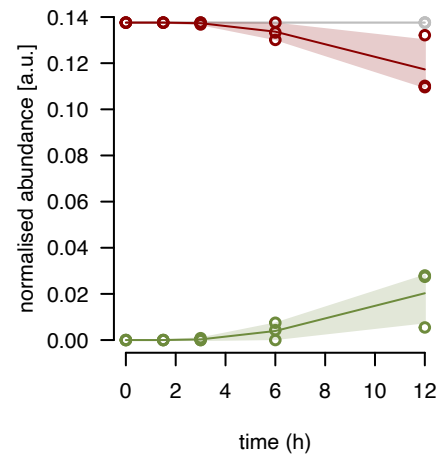**mS26 fraction 16**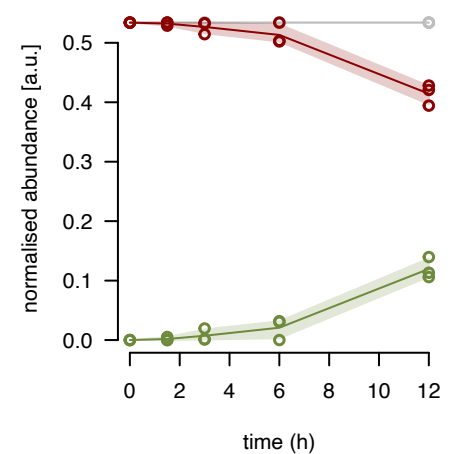

**mS27 fraction 1**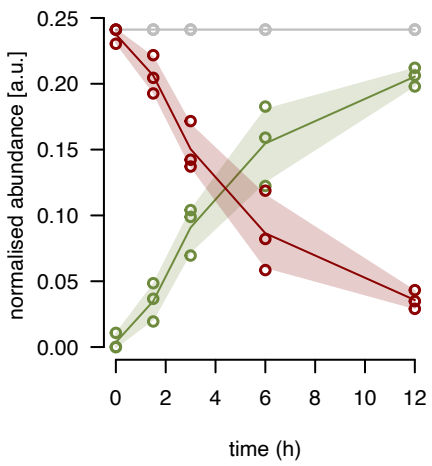**mS27 fraction 2**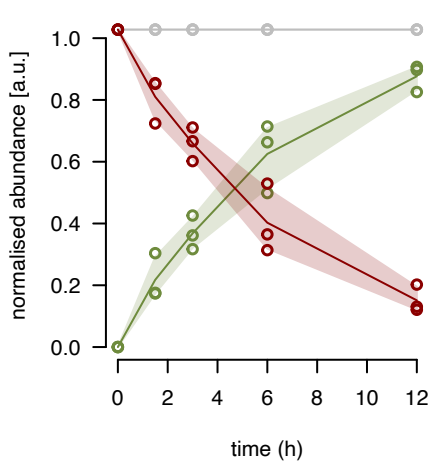**mS27 fraction 3**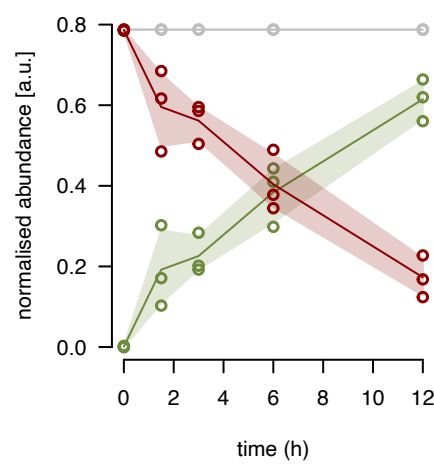**mS27 fraction 4**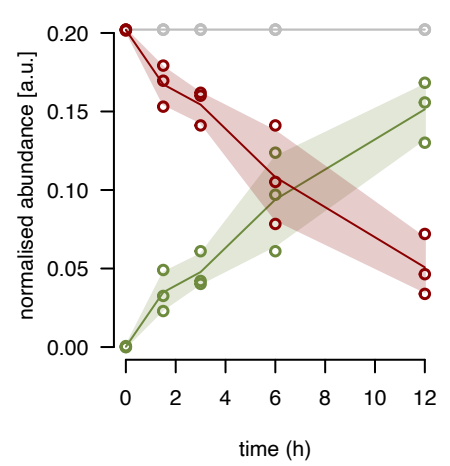**mS27 fraction 5**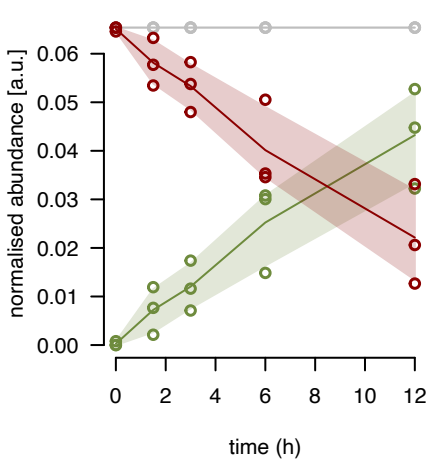**mS27 fraction 6**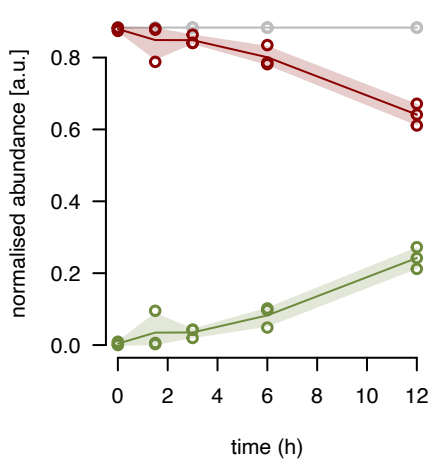**mS27 fraction 7**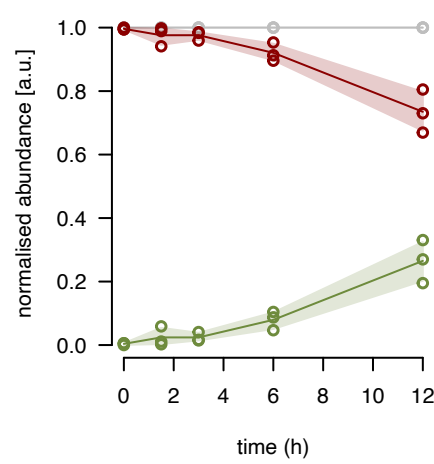**mS27 fraction 8**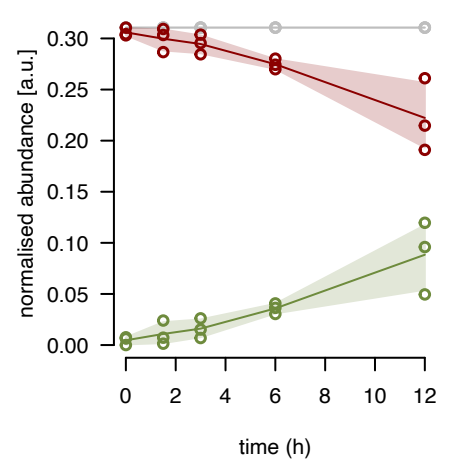**mS27 fraction 9**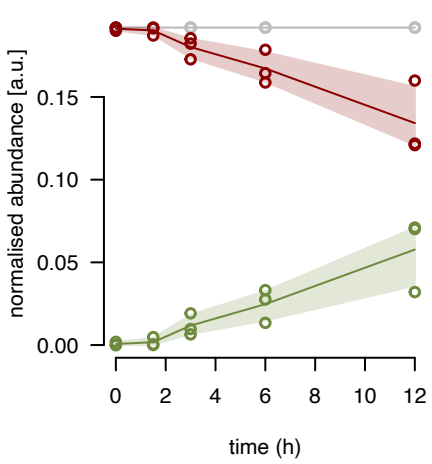**mS27 fraction 10**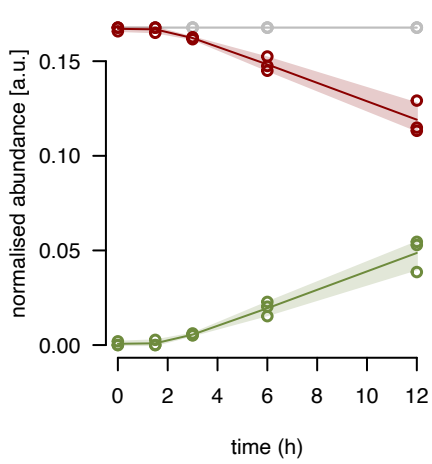**mS27 fraction 11**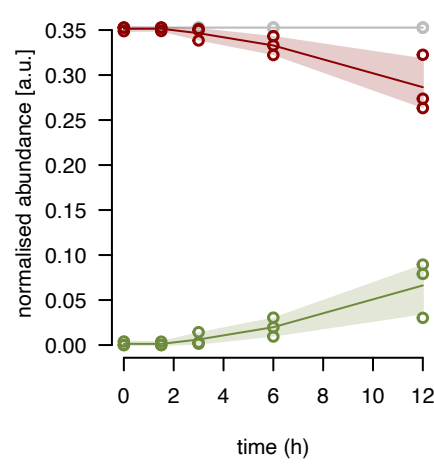**mS27 fraction 12**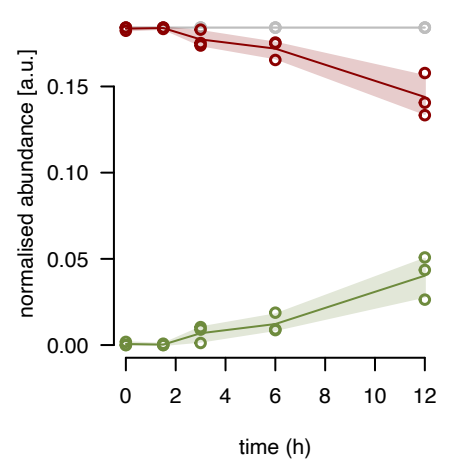**mS27 fraction 13**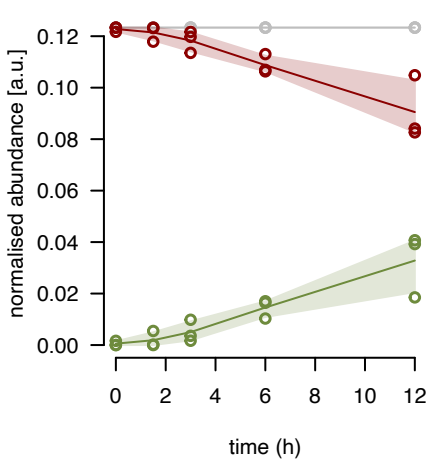**mS27 fraction 14**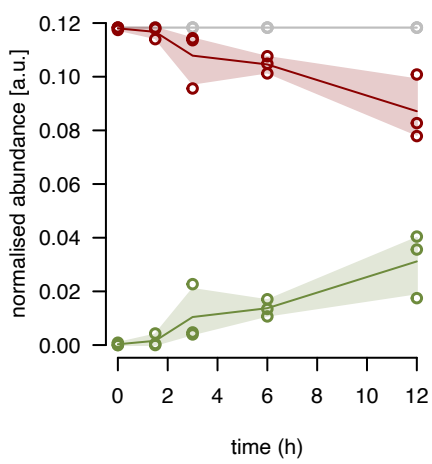**mS27 fraction 15**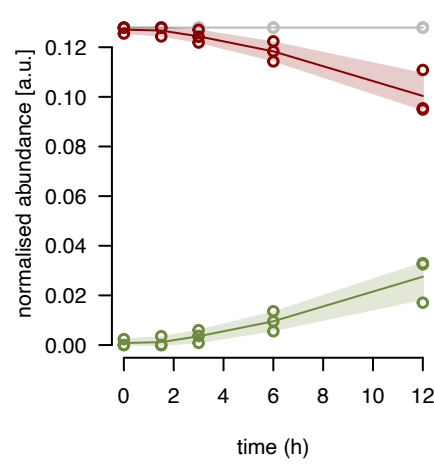**mS27 fraction 16**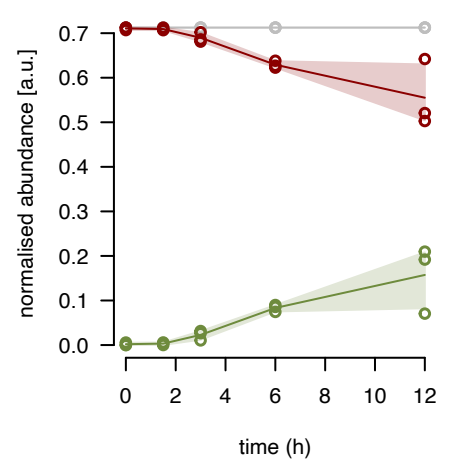

**mS29 fraction 1**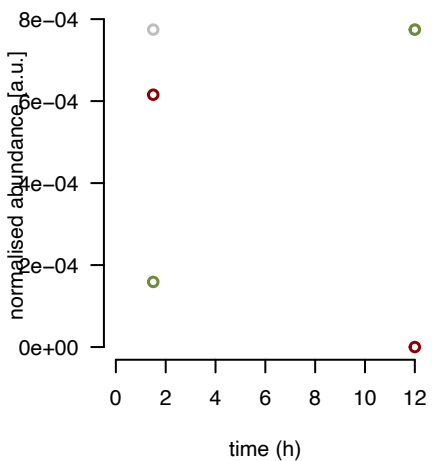**mS29 fraction 2**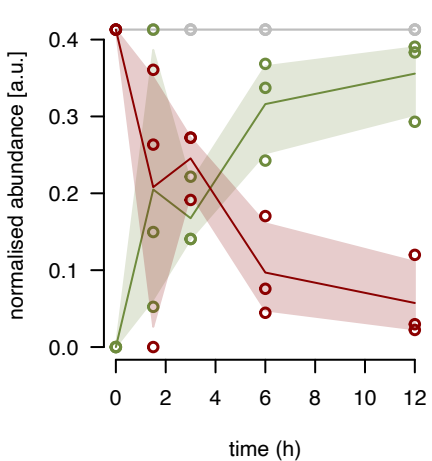**mS29 fraction 3**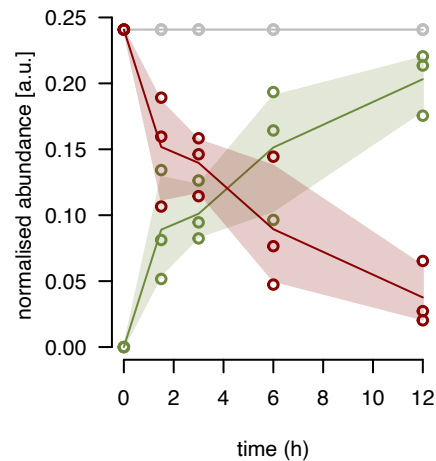**mS29 fraction 4**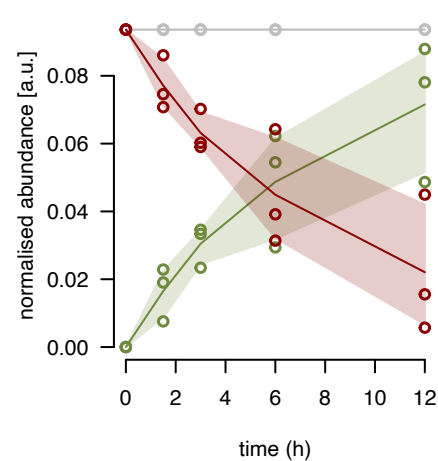**mS29 fraction 5**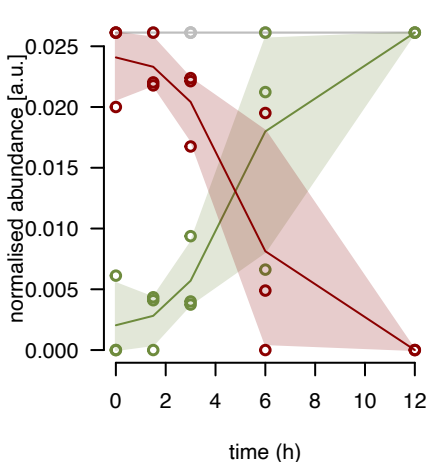**mS29 fraction 6**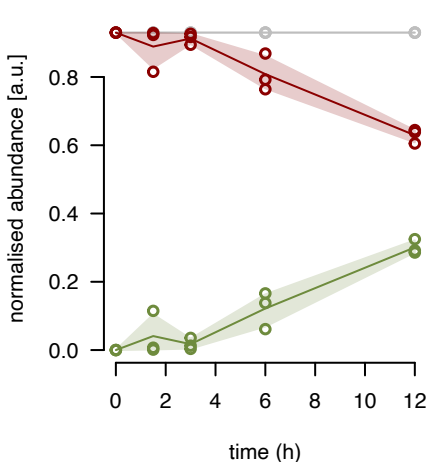**mS29 fraction 7**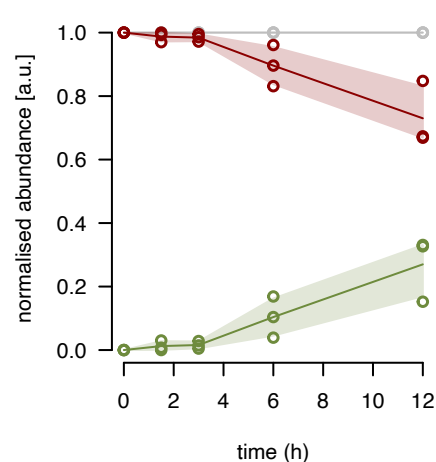**mS29 fraction 8**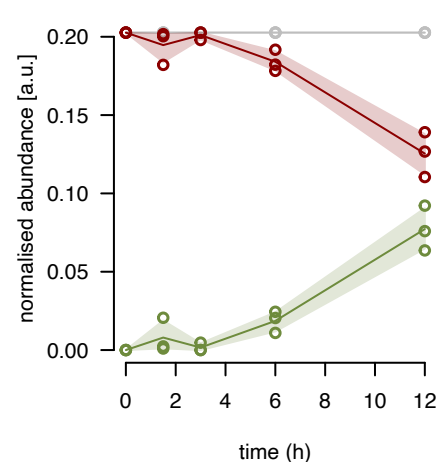**mS29 fraction 9**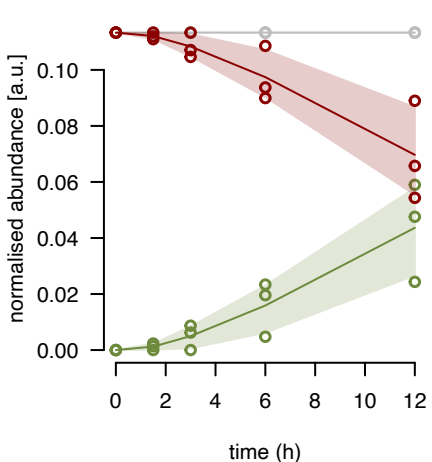**mS29 fraction 10**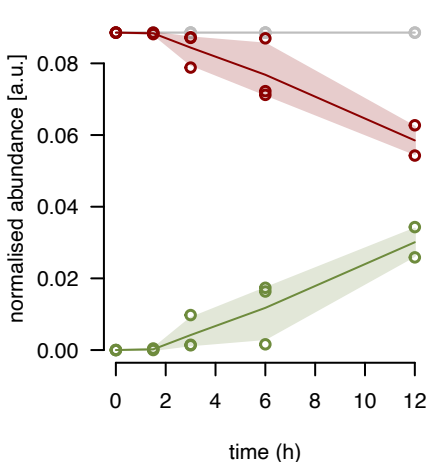**mS29 fraction 11**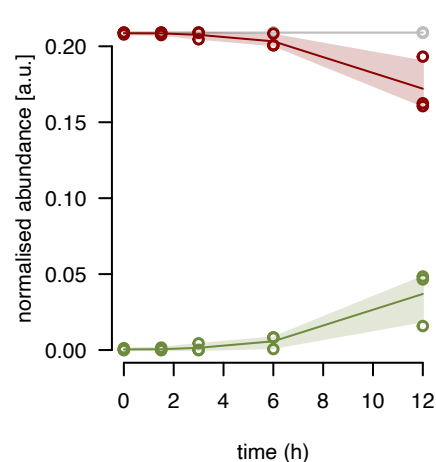**mS29 fraction 12**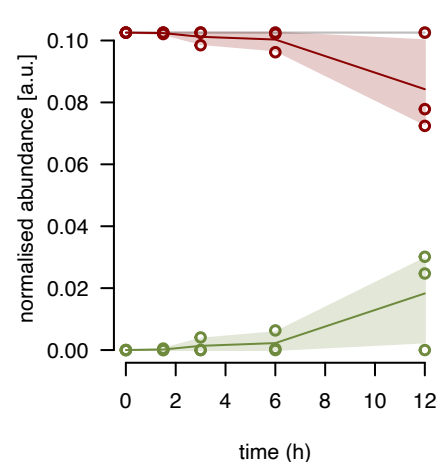**mS29 fraction 13**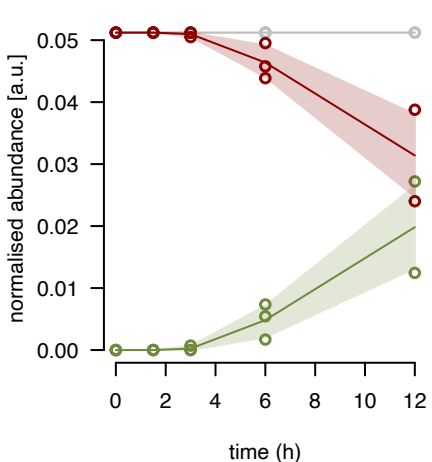**mS29 fraction 14**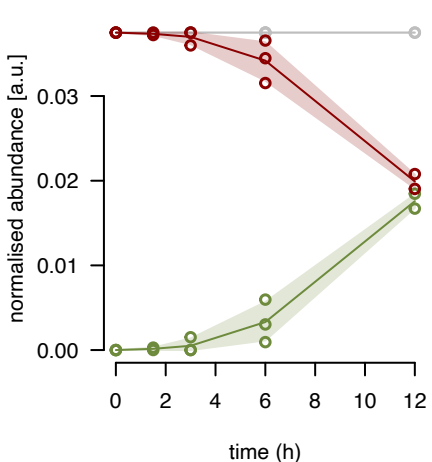**mS29 fraction 15**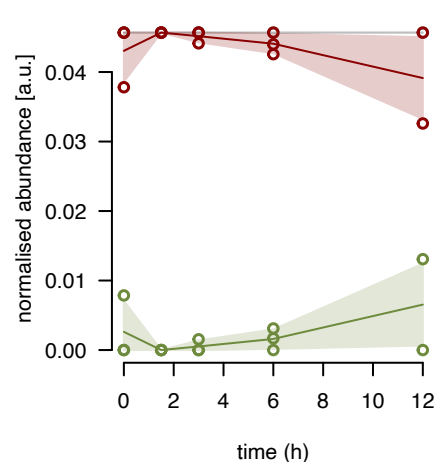**mS29 fraction 16**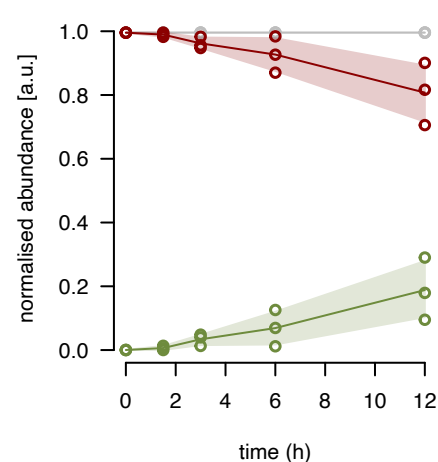

**mS31 fraction 1**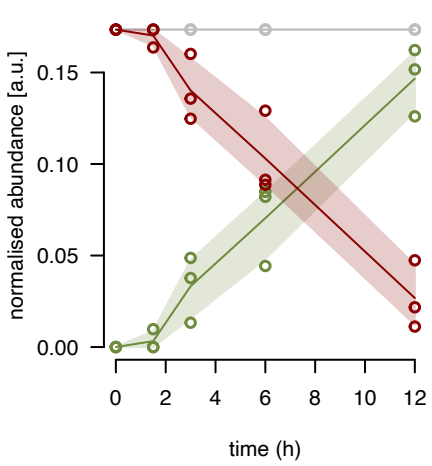**mS31 fraction 2**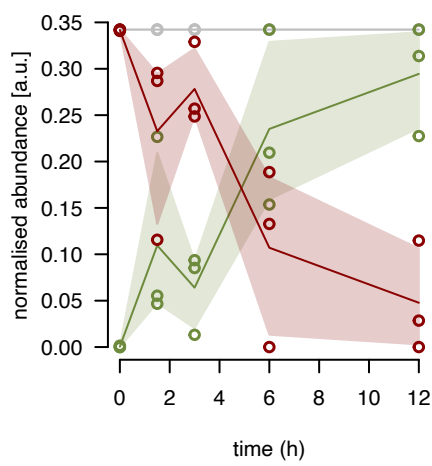**mS31 fraction 3**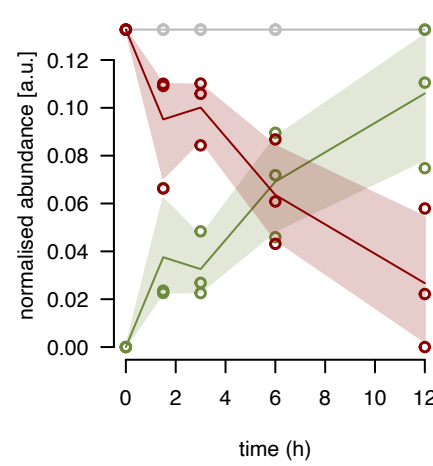**mS31 fraction 4**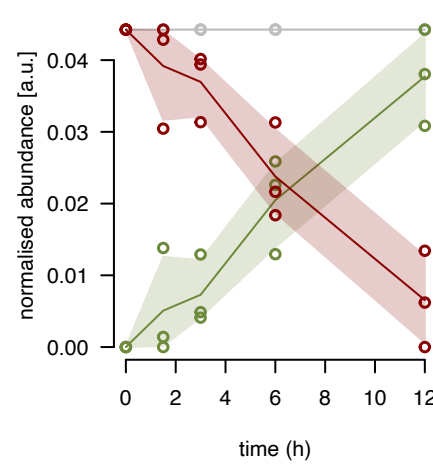**mS31 fraction 5**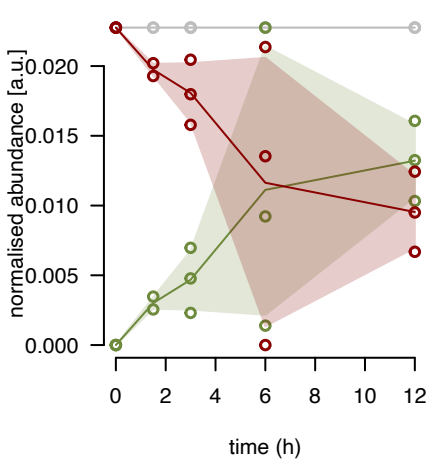**mS31 fraction 6**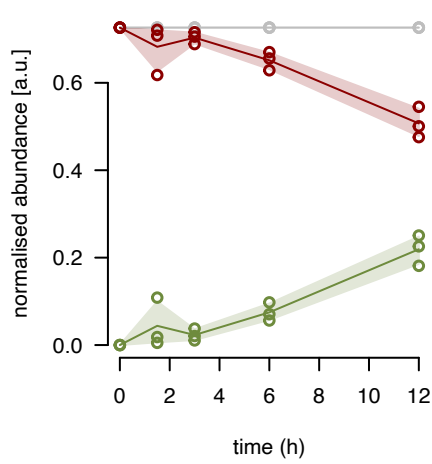**mS31 fraction 7**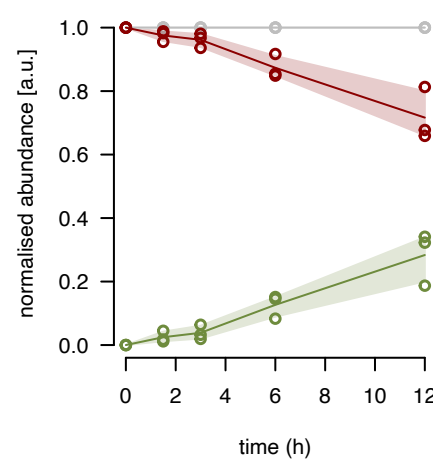**mS31 fraction 8**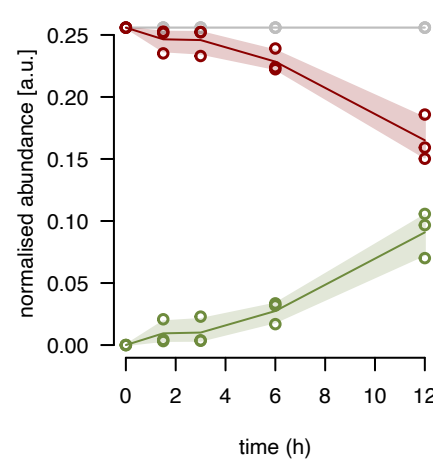**mS31 fraction 9**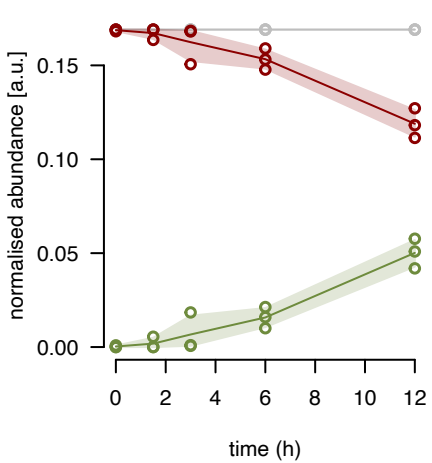**mS31 fraction 10**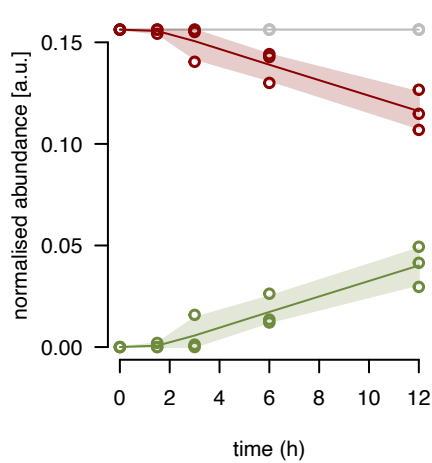**mS31 fraction 11**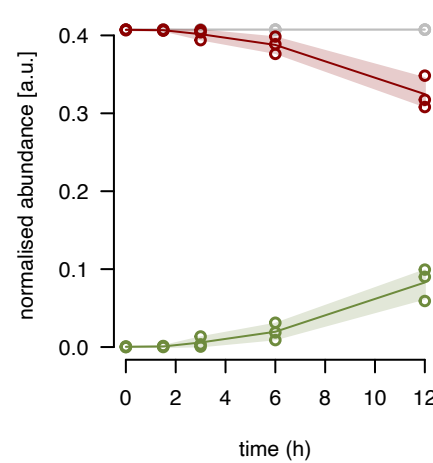**mS31 fraction 12**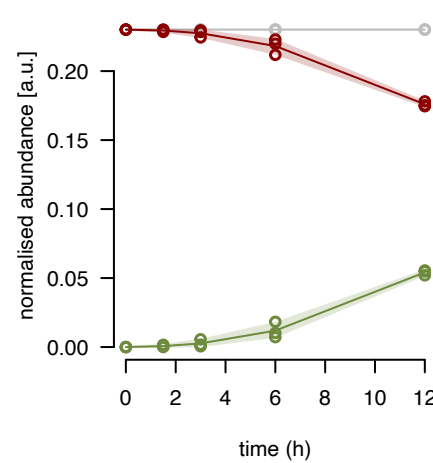**mS31 fraction 13**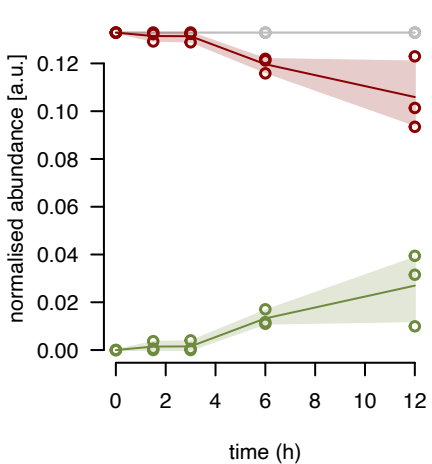**mS31 fraction 14**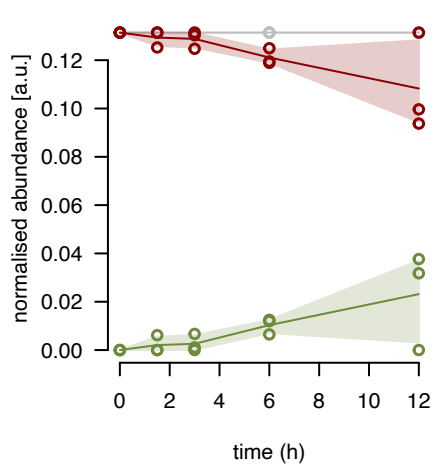**mS31 fraction 15**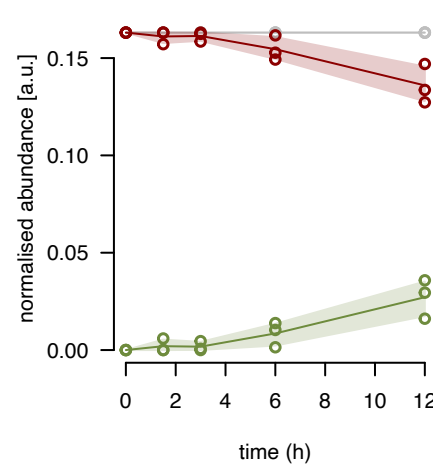**mS31 fraction 16**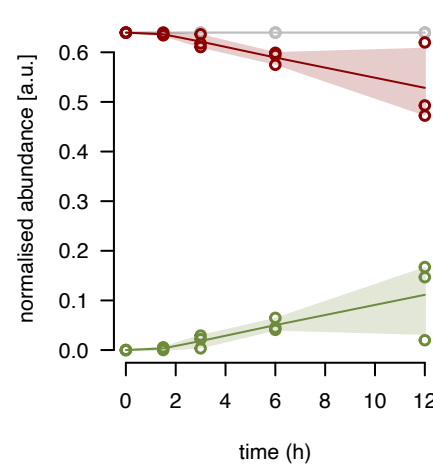

**mS33 fraction 1****mS33 fraction 2****mS33 fraction 3****mS33 fraction 4**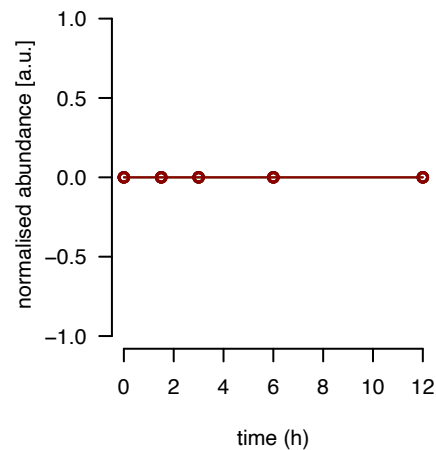**mS33 fraction 5**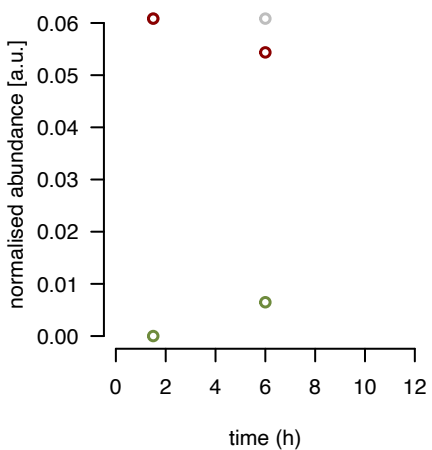**mS33 fraction 6**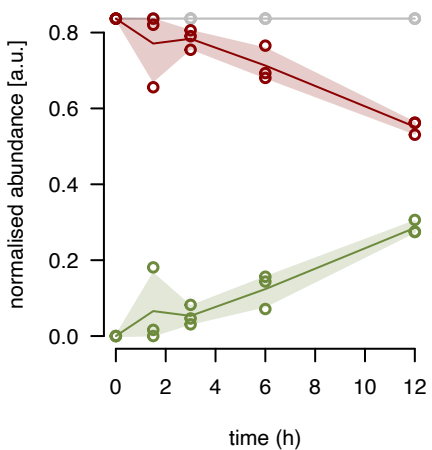**mS33 fraction 7**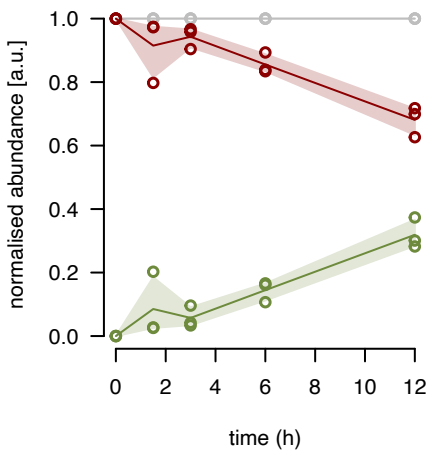**mS33 fraction 8**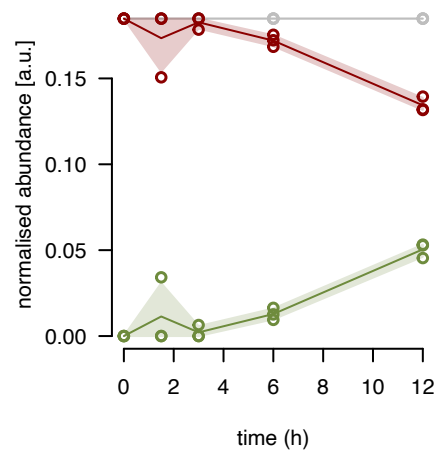**mS33 fraction 9**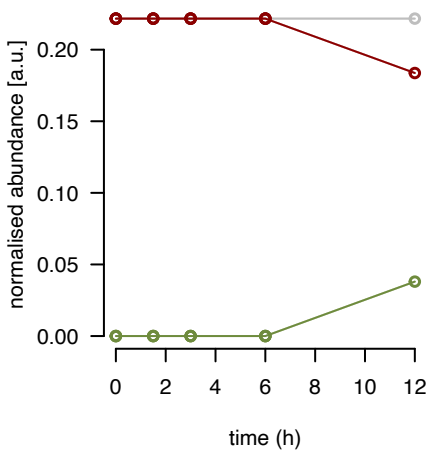**mS33 fraction 10**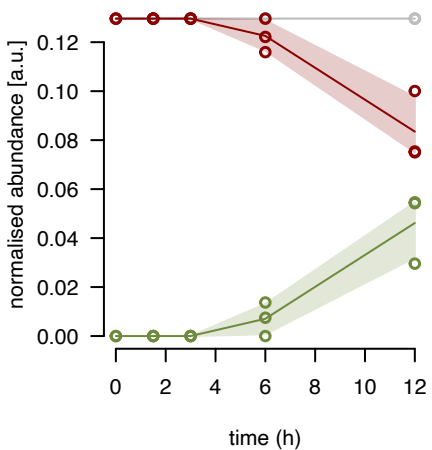**mS33 fraction 11**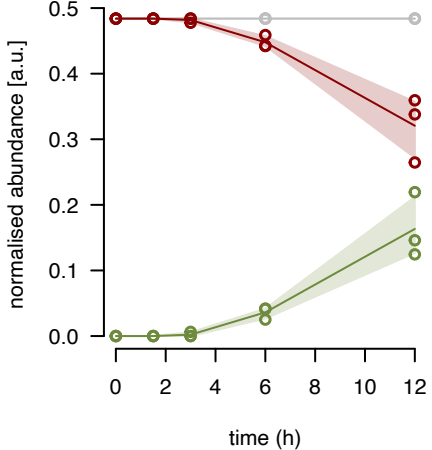**mS33 fraction 12**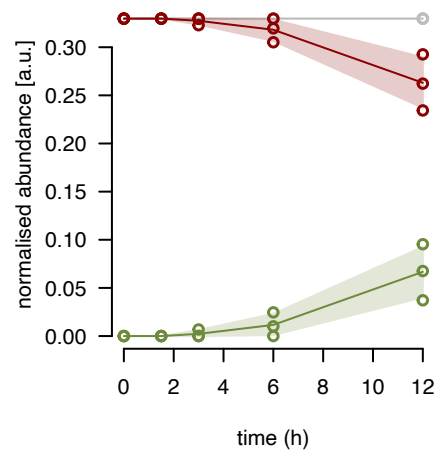**mS33 fraction 13**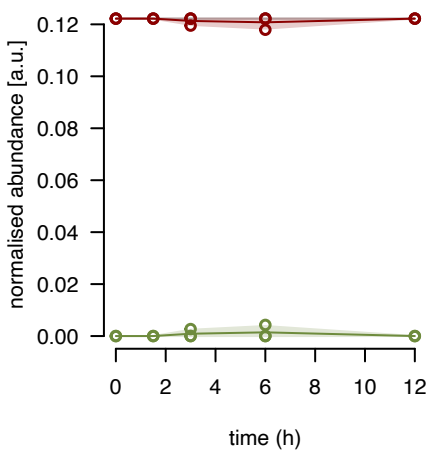**mS33 fraction 14**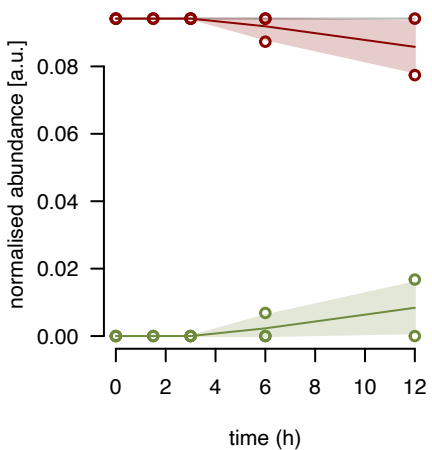**mS33 fraction 15**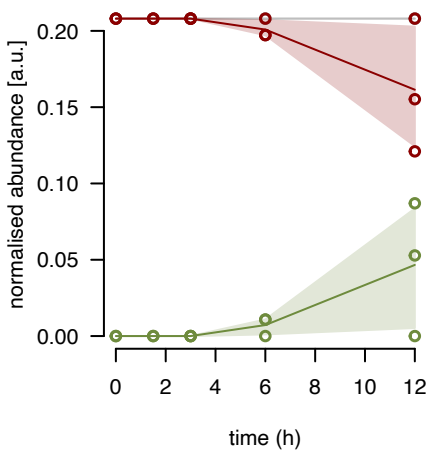**mS33 fraction 16**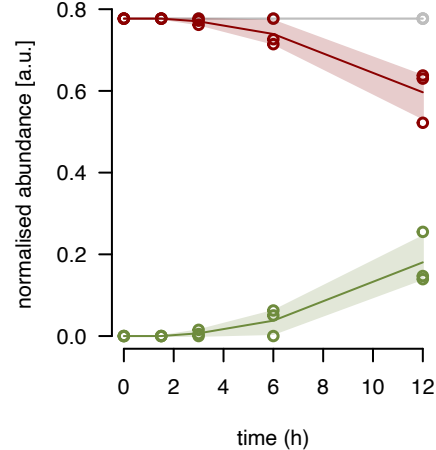





**mS35 fraction 1**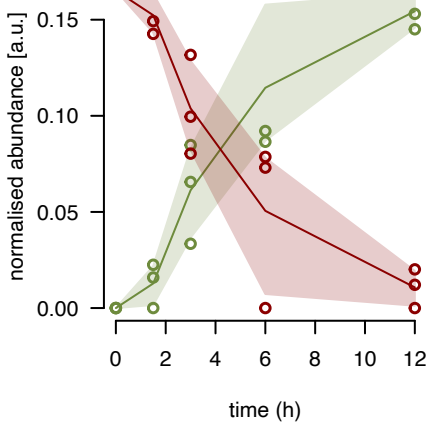**mS35 fraction 2**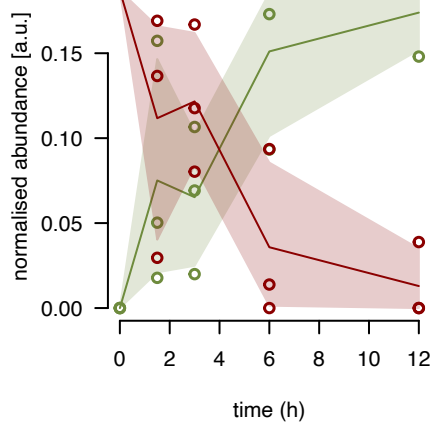**mS35 fraction 3**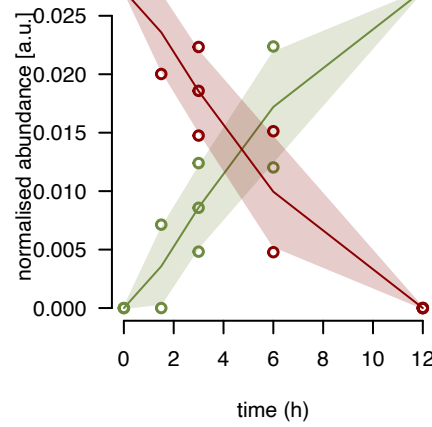**mS35 fraction 4**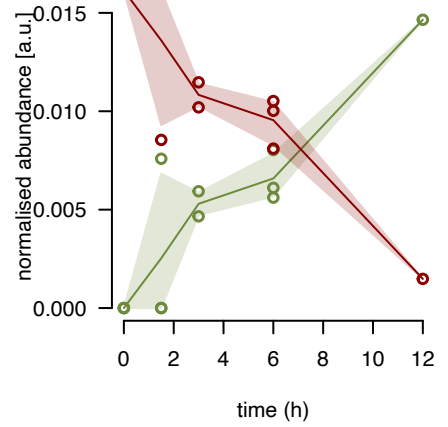**mS35 fraction 5**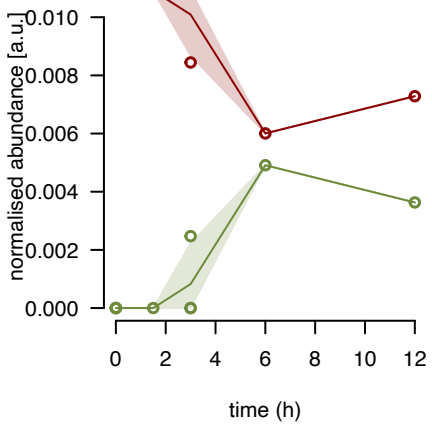**mS35 fraction 6**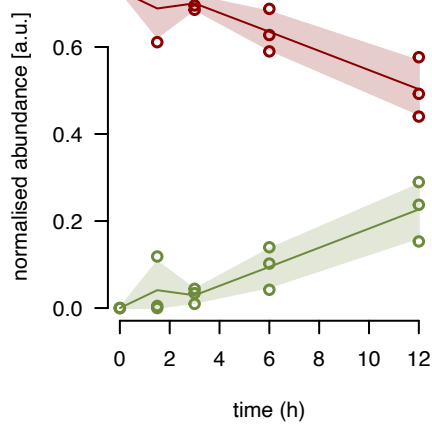**mS35 fraction 7**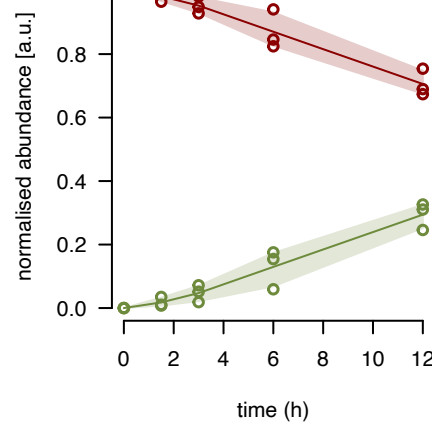**mS35 fraction 8**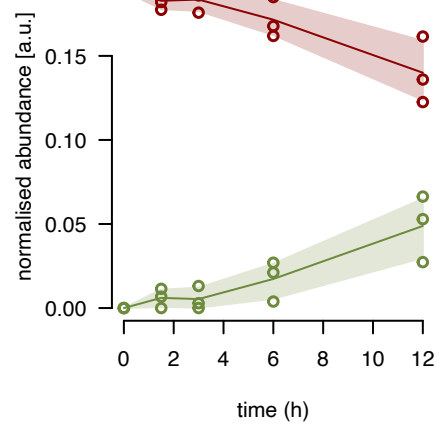**mS35 fraction 9**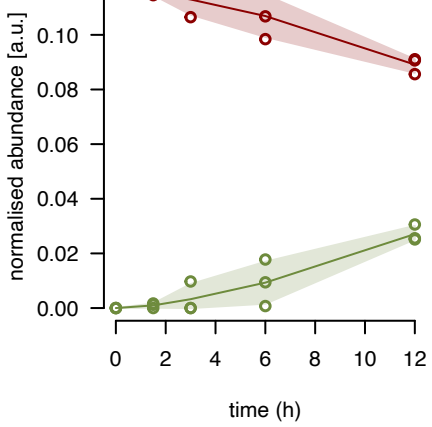**mS35 fraction 10**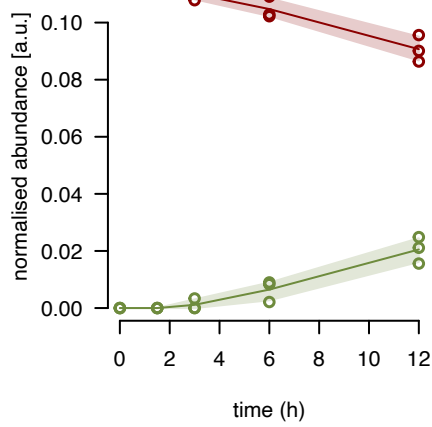**mS35 fraction 11**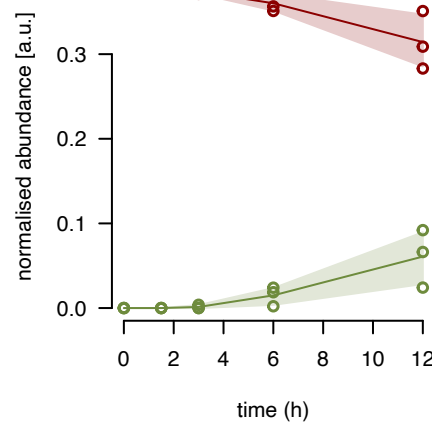**mS35 fraction 12**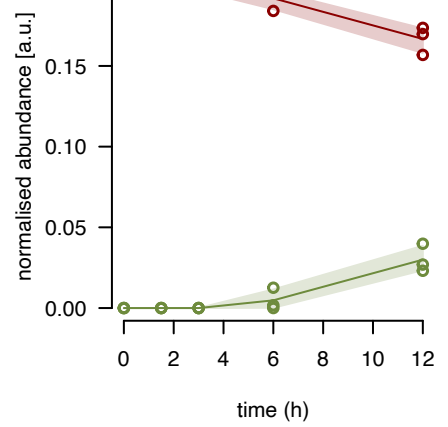**mS35 fraction 13**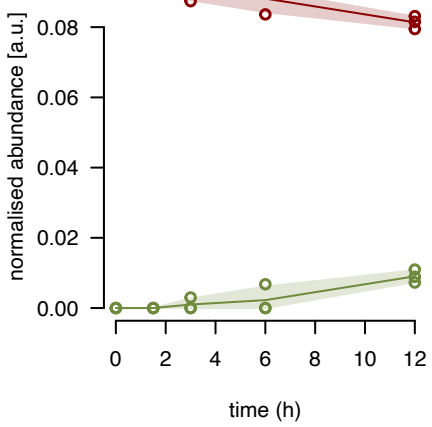**mS35 fraction 14**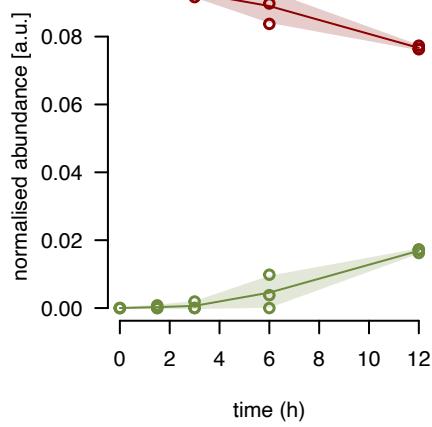**mS35 fraction 15**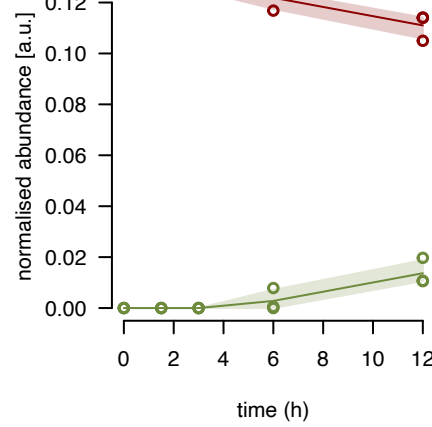**mS35 fraction 16**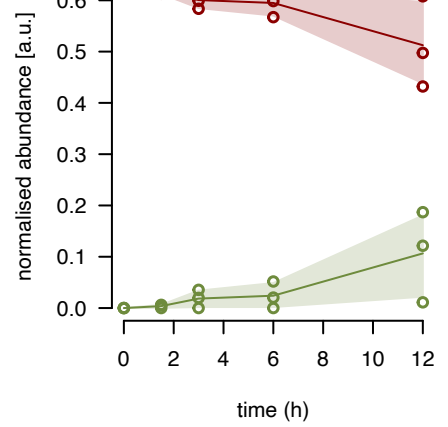



**mS38 fraction 1****mS38 fraction 2****mS38 fraction 3****mS38 fraction 4**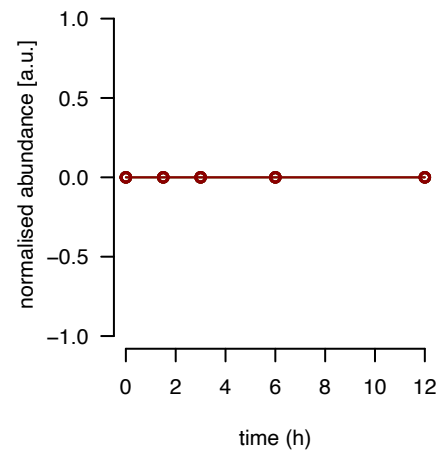**mS38 fraction 5****mS38 fraction 6**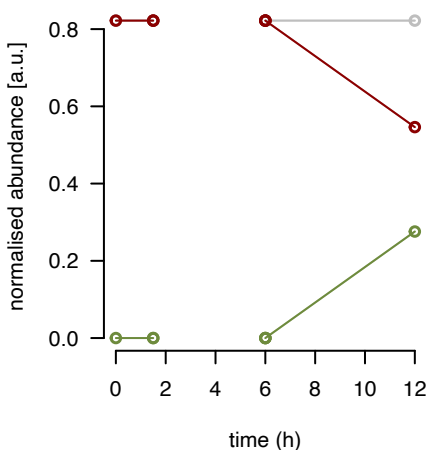**mS38 fraction 7**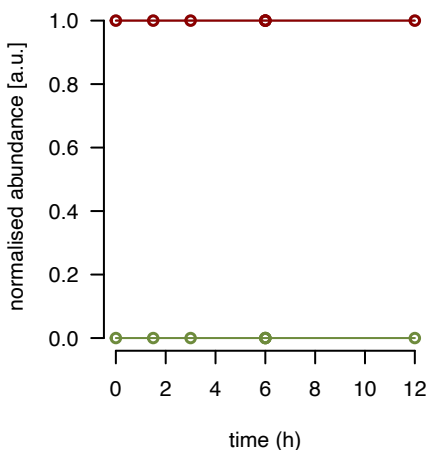**mS38 fraction 8**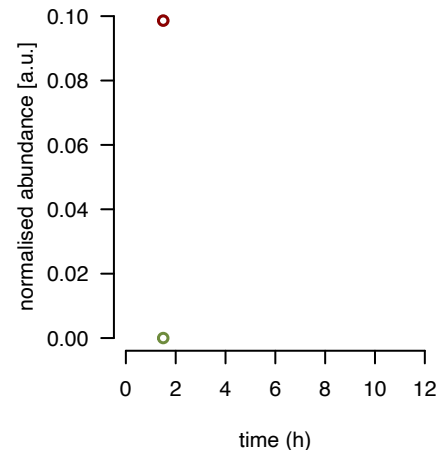**mS38 fraction 9****mS38 fraction 10**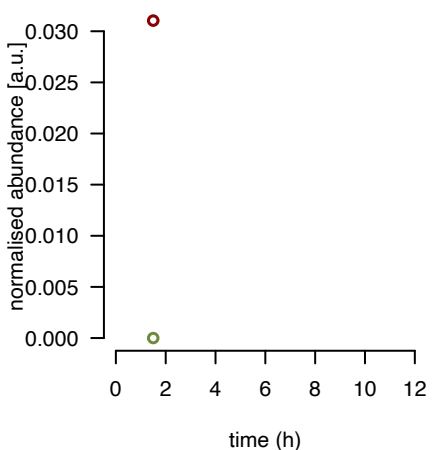**mS38 fraction 11**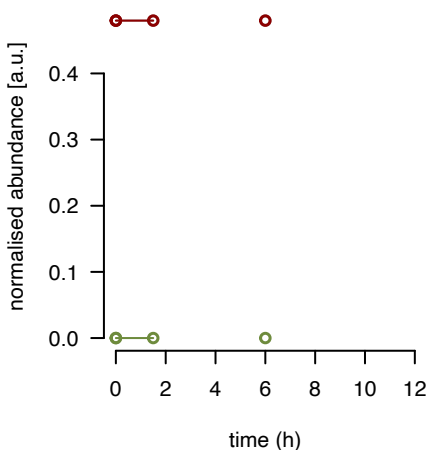**mS38 fraction 12**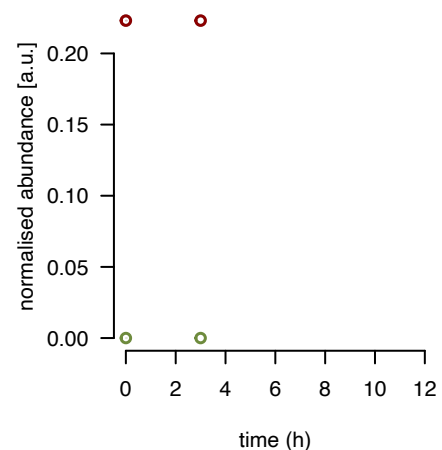**mS38 fraction 13**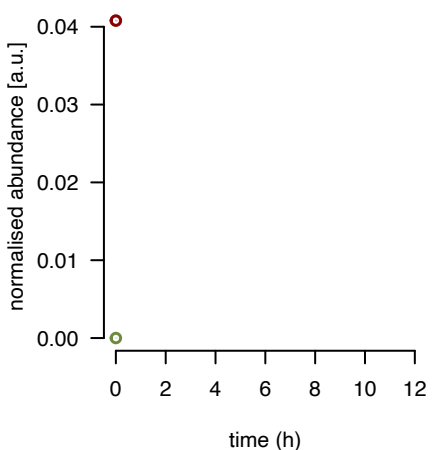**mS38 fraction 14**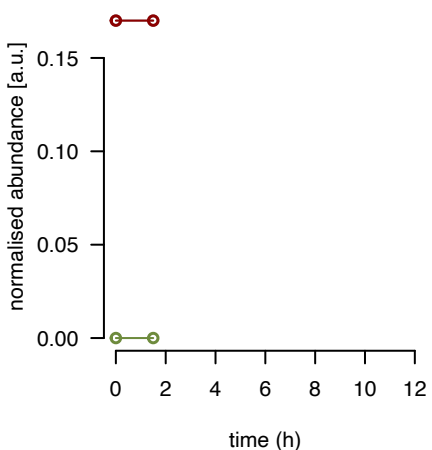**mS38 fraction 15**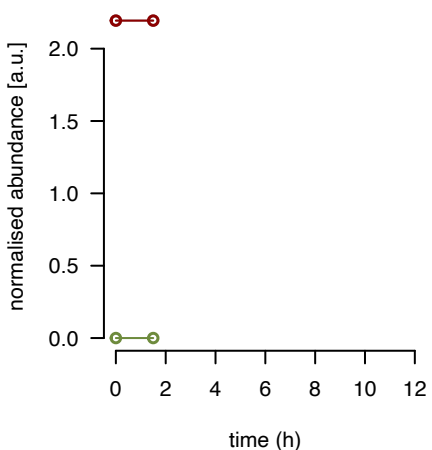**mS38 fraction 16**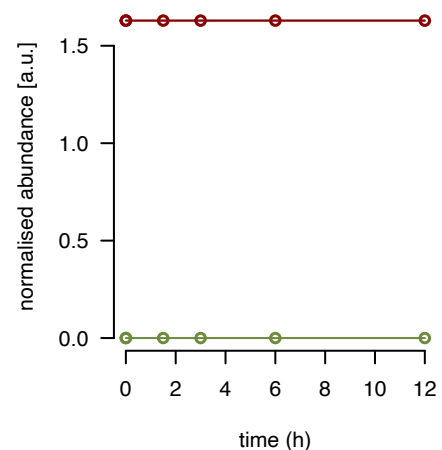

**mS39 fraction 1**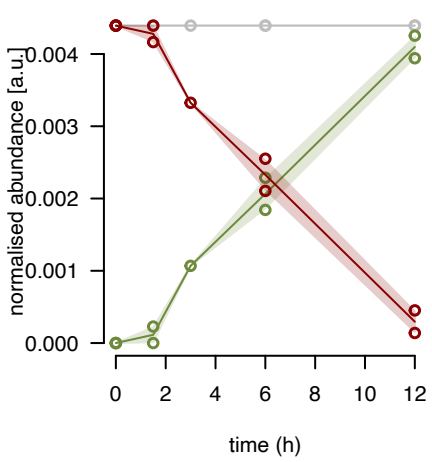**mS39 fraction 2**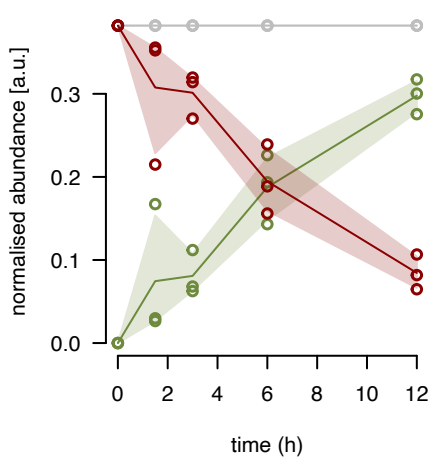**mS39 fraction 3**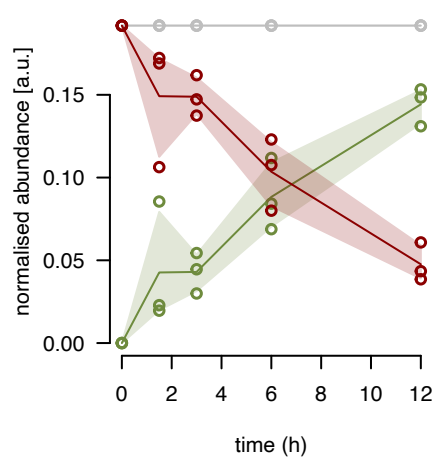**mS39 fraction 4**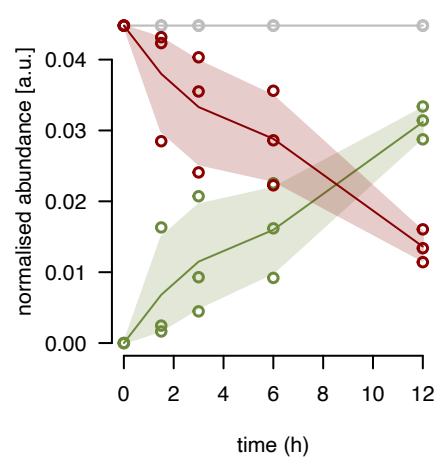**mS39 fraction 5**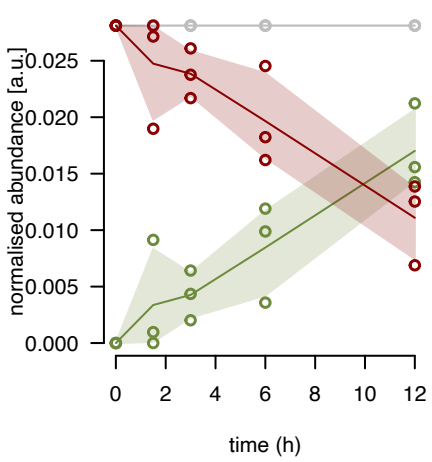**mS39 fraction 6**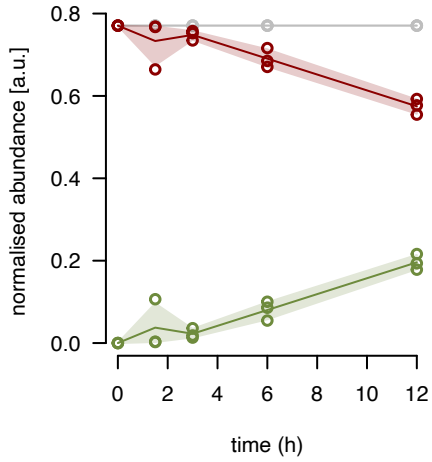**mS39 fraction 7**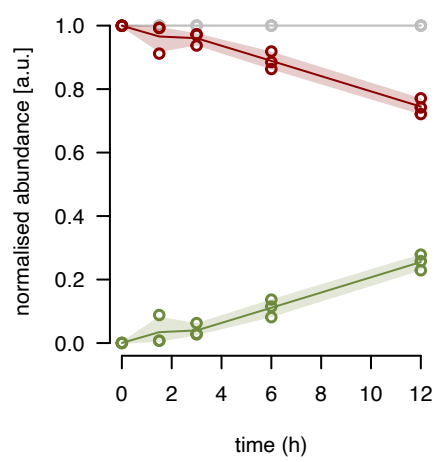**mS39 fraction 8**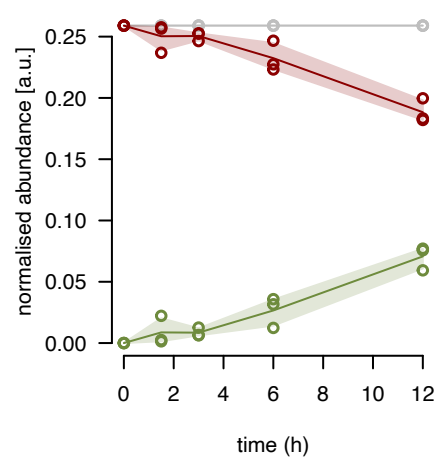**mS39 fraction 9**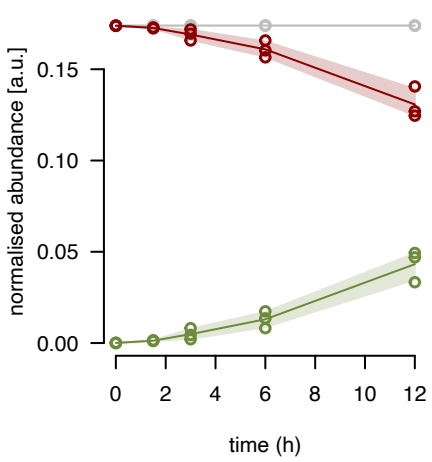**mS39 fraction 10**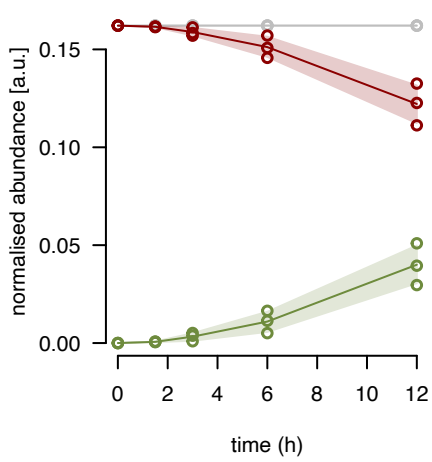**mS39 fraction 11**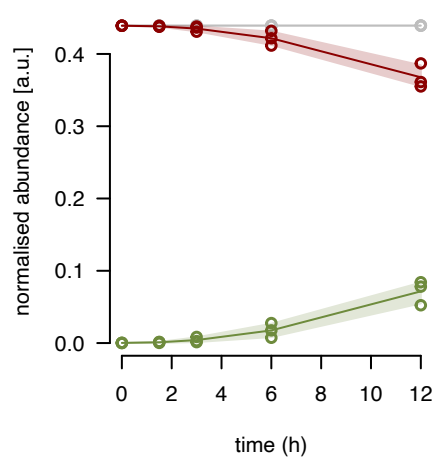**mS39 fraction 12**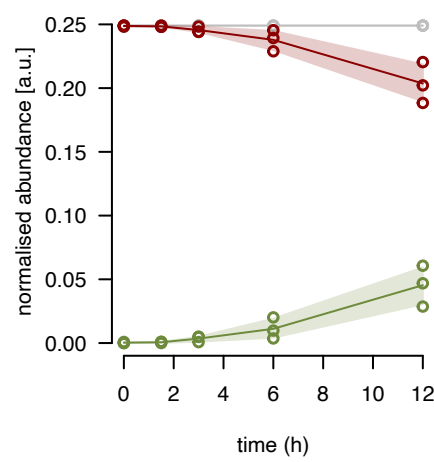**mS39 fraction 13**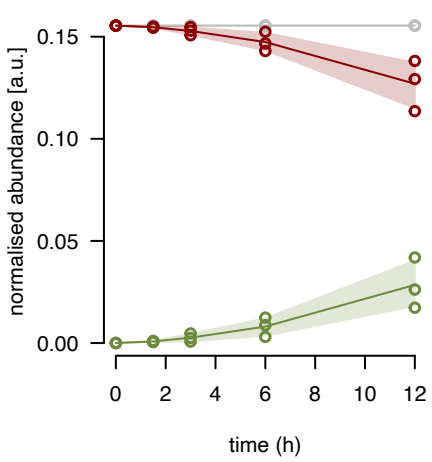**mS39 fraction 14**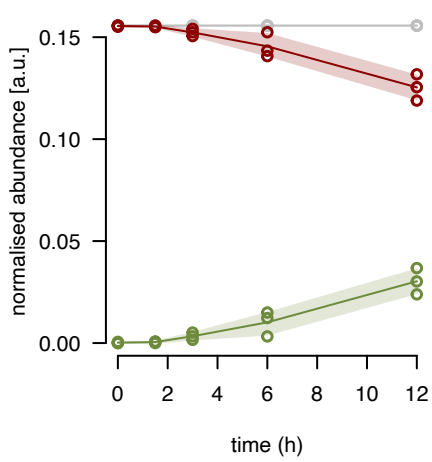**mS39 fraction 15**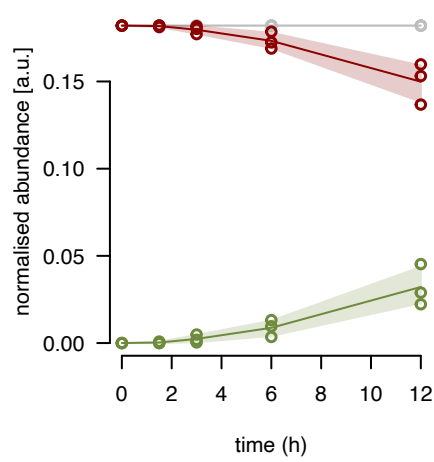**mS39 fraction 16**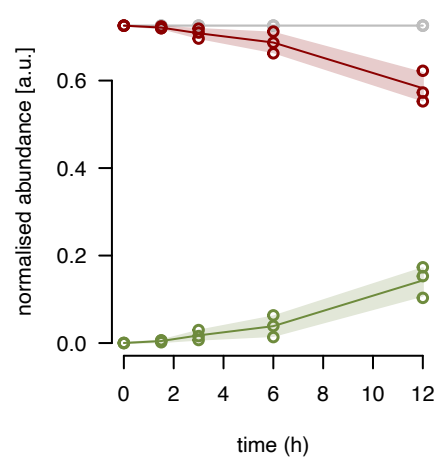

**mS40 fraction 1****mS40 fraction 2**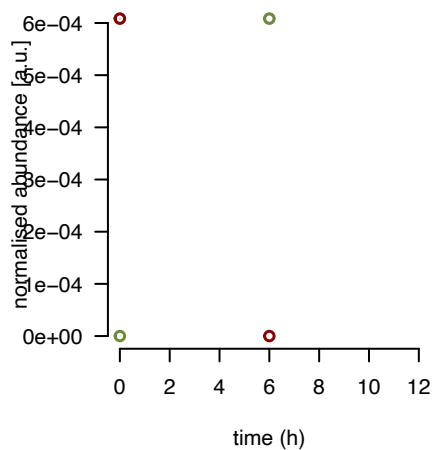**mS40 fraction 3**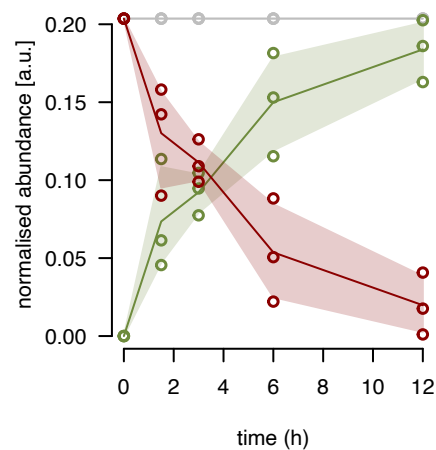**mS40 fraction 4**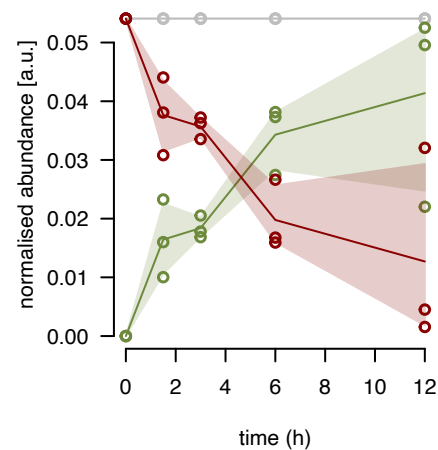**mS40 fraction 5**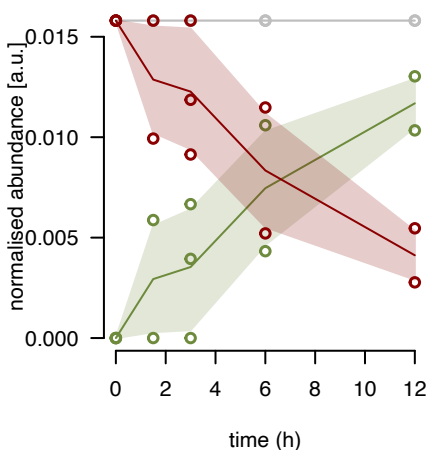**mS40 fraction 6**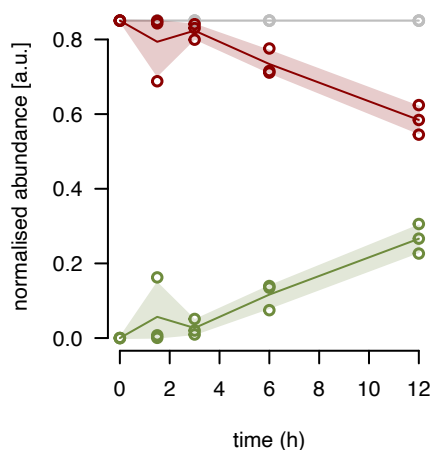**mS40 fraction 7**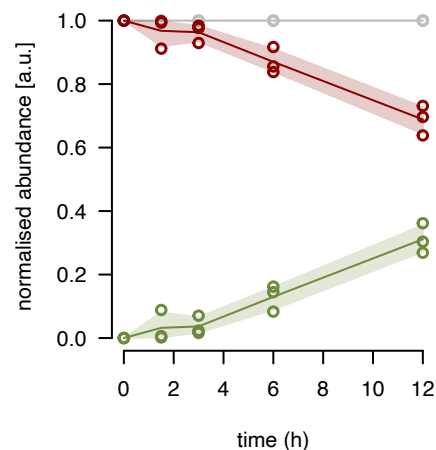**mS40 fraction 8**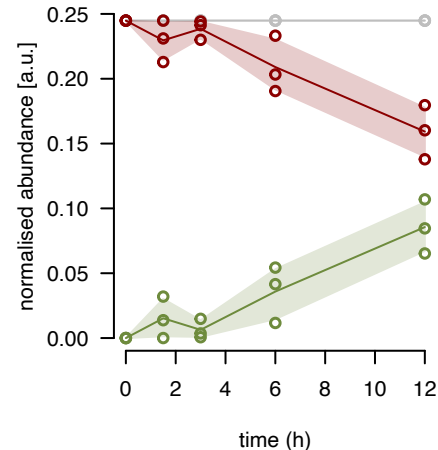**mS40 fraction 9**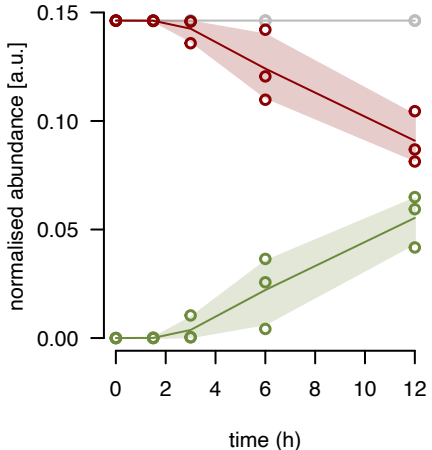**mS40 fraction 10**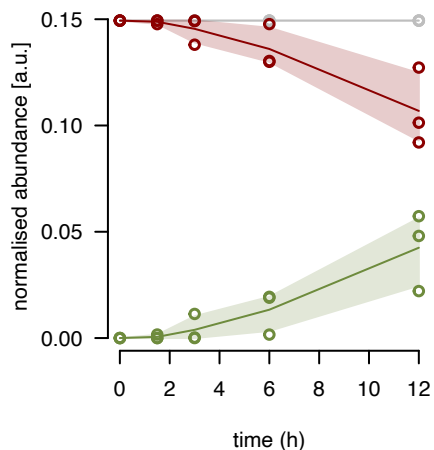**mS40 fraction 11**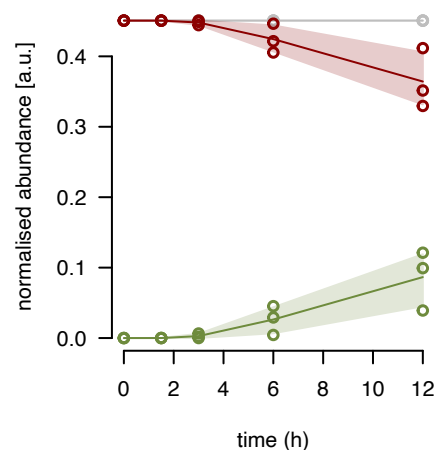**mS40 fraction 12**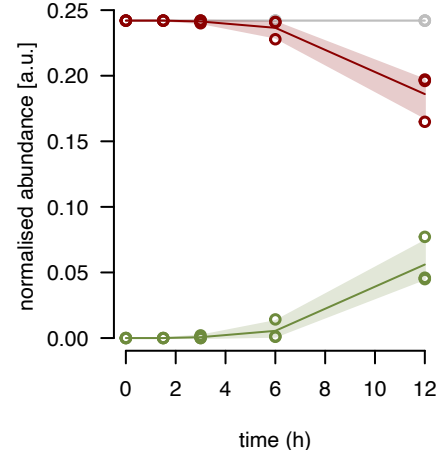**mS40 fraction 13**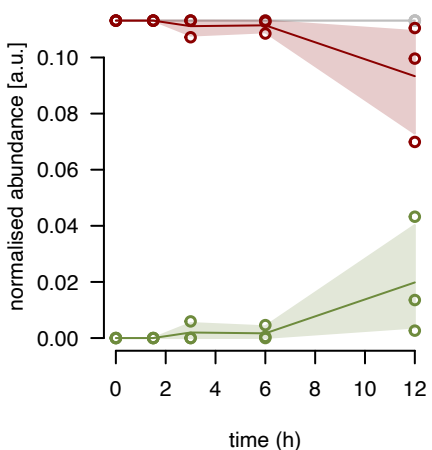**mS40 fraction 14**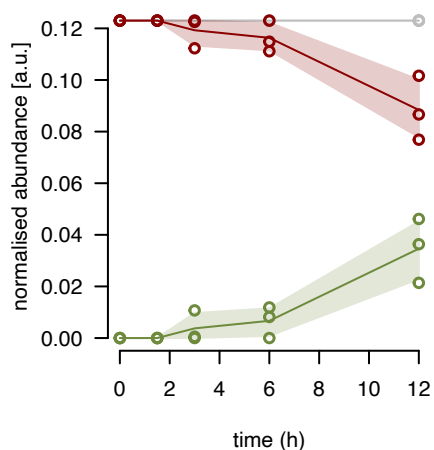**mS40 fraction 15**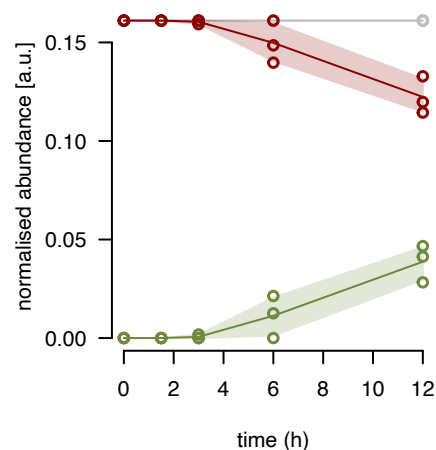**mS40 fraction 16**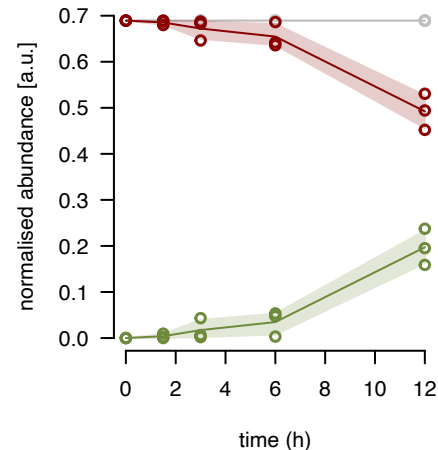

Supplement: 41594_2024_1356_MOESM7_ESM.pdf [file 41594_2024_1356_MOESM7_ESM.pdf]
