# Supplementary material for: A roadmap for ribosome assembly in human mitochondria
Source: PubMed Central journal article supplement (PMC11638073; doi:10.1038/s41594-024-01356-w), 2024-07-11

**uL1m fraction 1**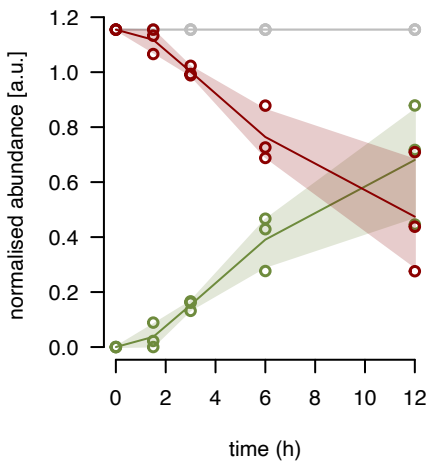**uL1m fraction 2**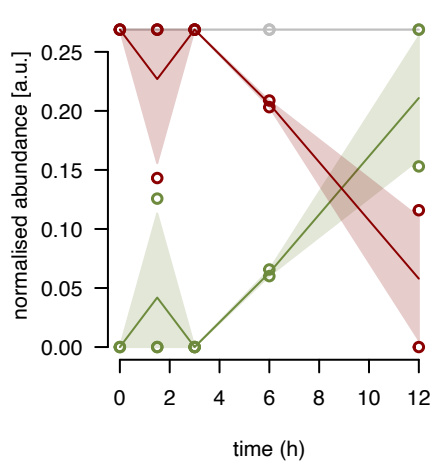**uL1m fraction 3**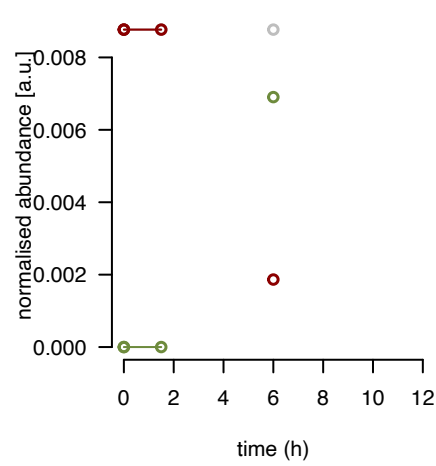**uL1m fraction 4**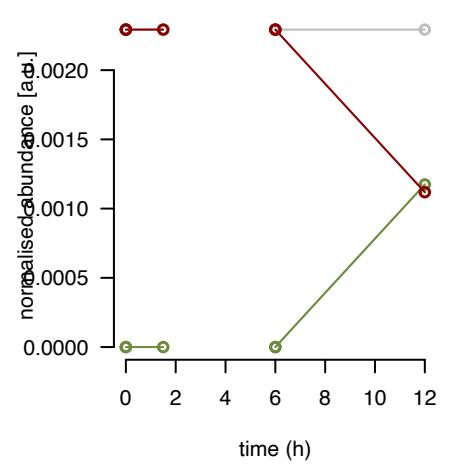**uL1m fraction 5**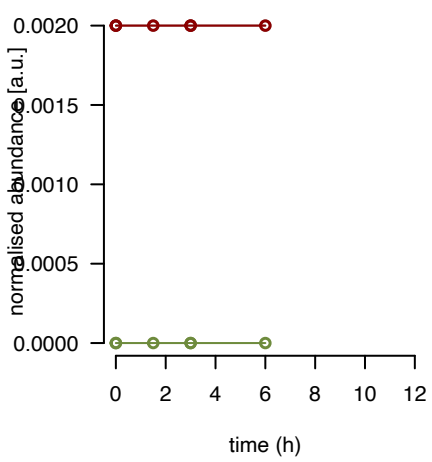**uL1m fraction 6**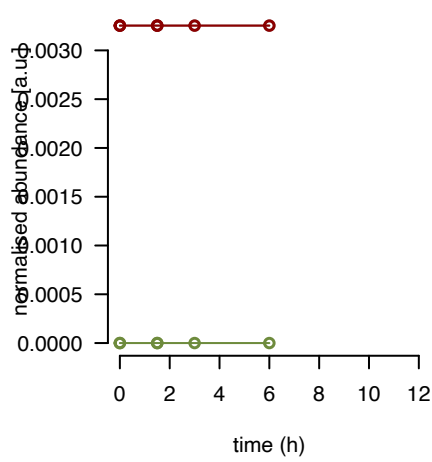**uL1m fraction 7**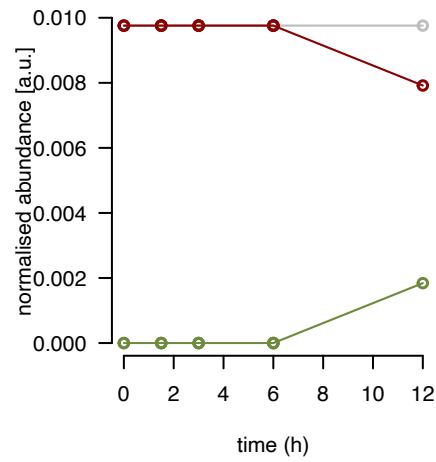**uL1m fraction 8**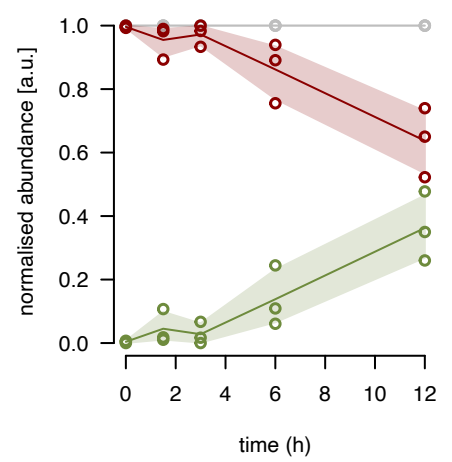**uL1m fraction 9**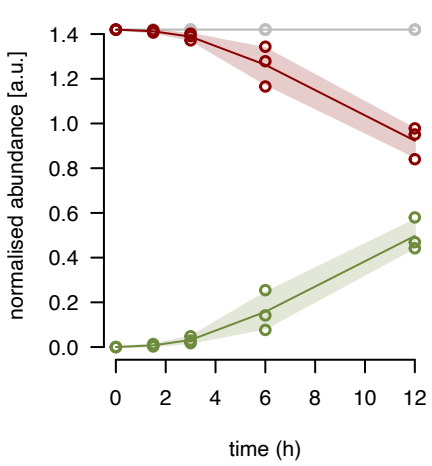**uL1m fraction 10**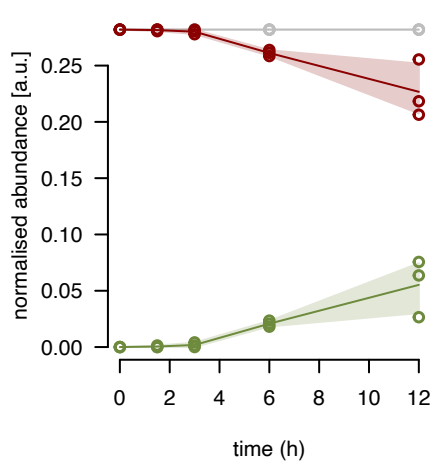**uL1m fraction 11**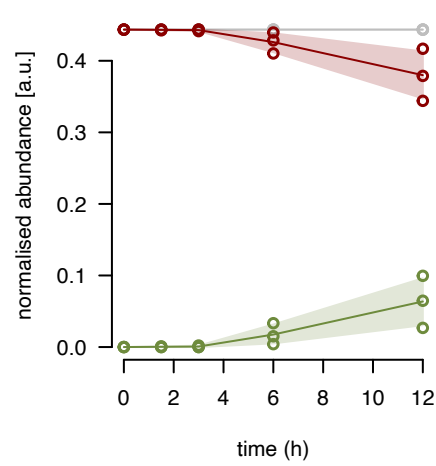**uL1m fraction 12**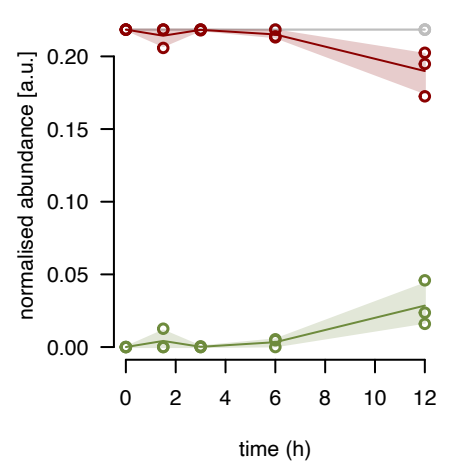**uL1m fraction 13**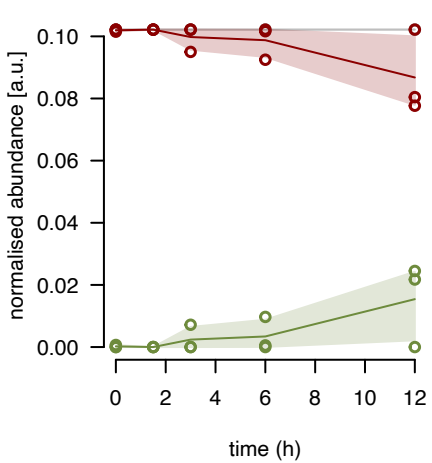**uL1m fraction 14**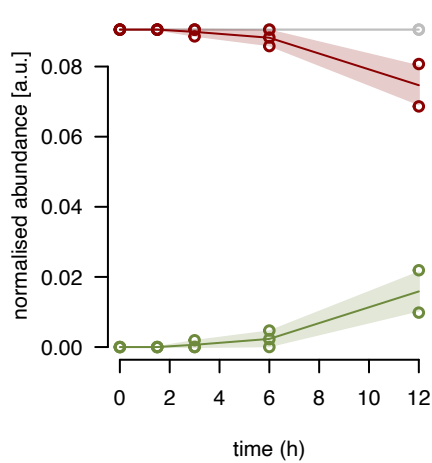**uL1m fraction 15**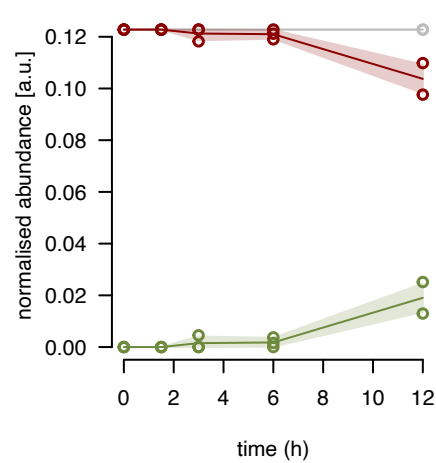**uL1m fraction 16**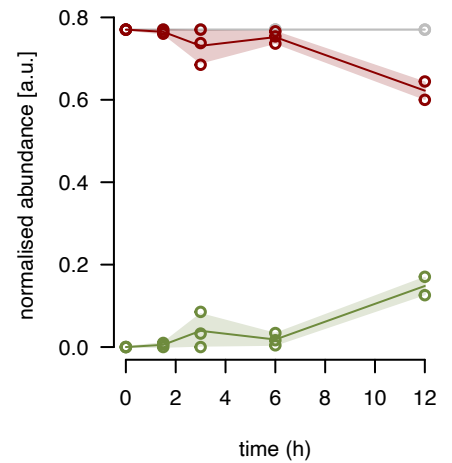

**uL2m fraction 1**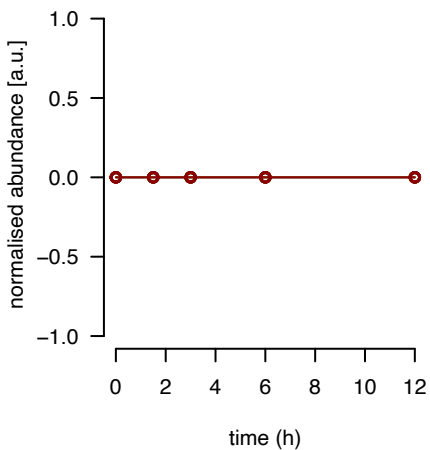**uL2m fraction 2**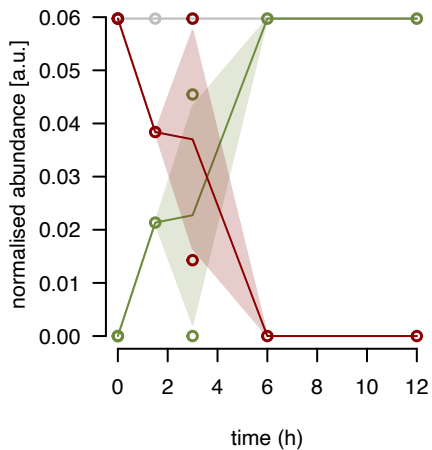**uL2m fraction 3**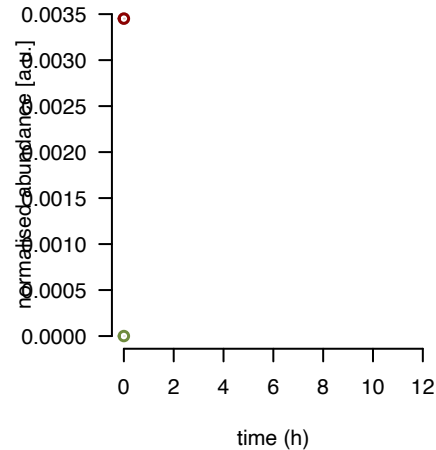**uL2m fraction 4**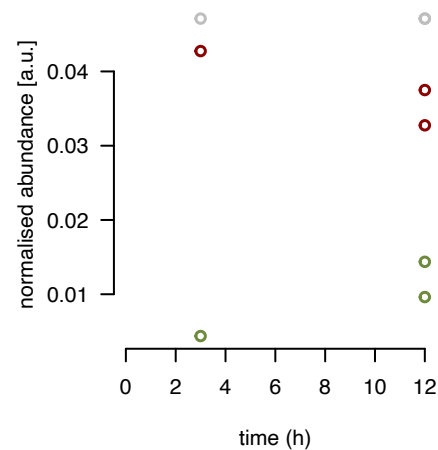**uL2m fraction 5**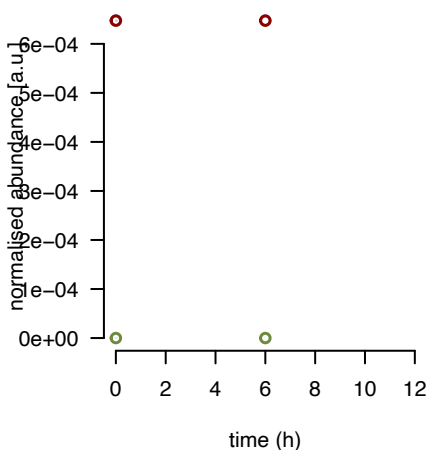**uL2m fraction 6**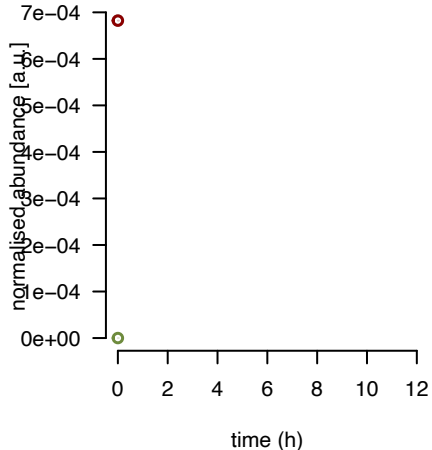**uL2m fraction 7**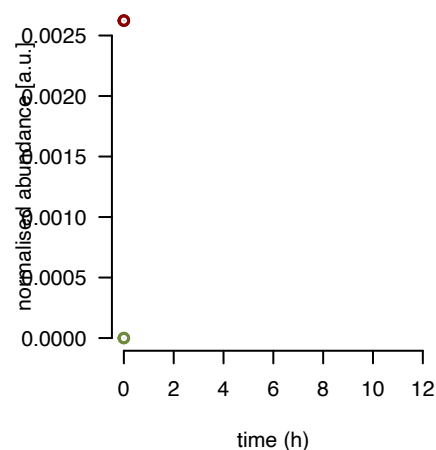**uL2m fraction 8**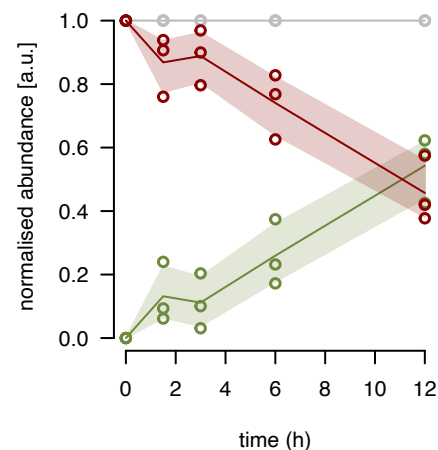**uL2m fraction 9**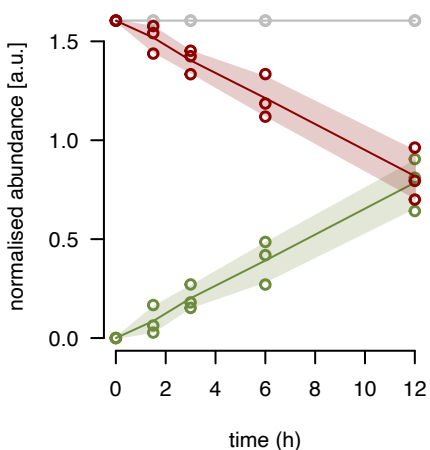**uL2m fraction 10**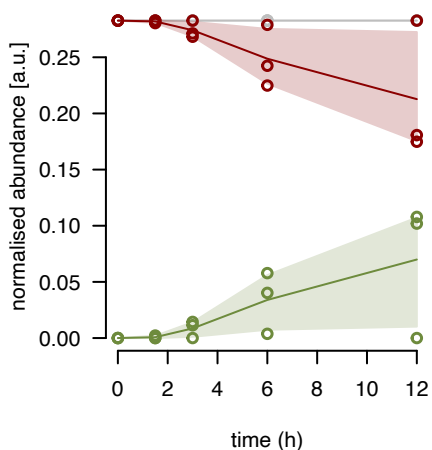**uL2m fraction 11**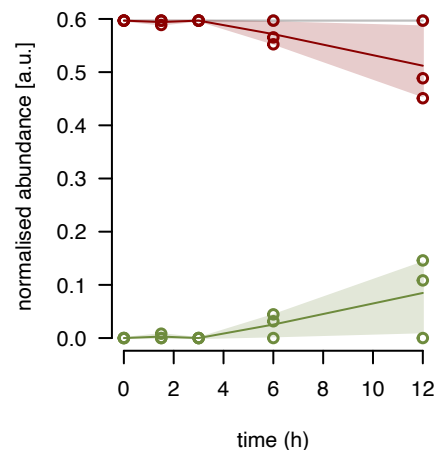**uL2m fraction 12**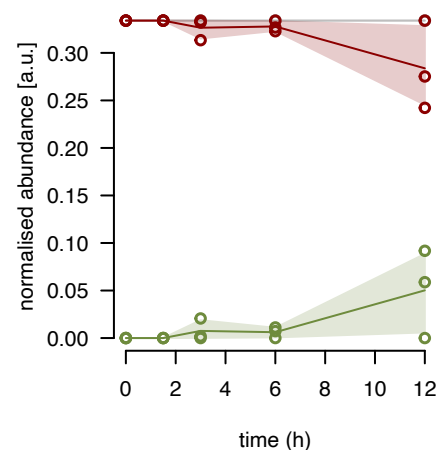**uL2m fraction 13**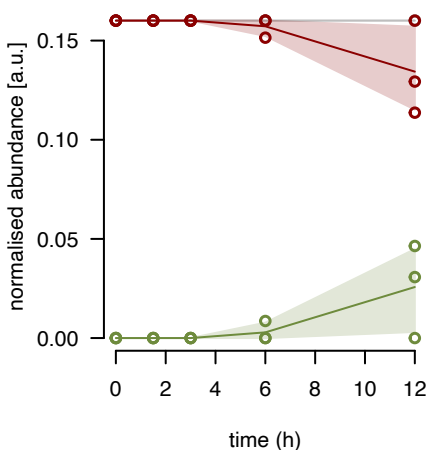**uL2m fraction 14**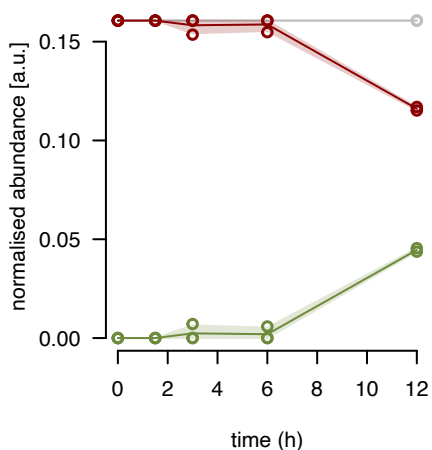**uL2m fraction 15**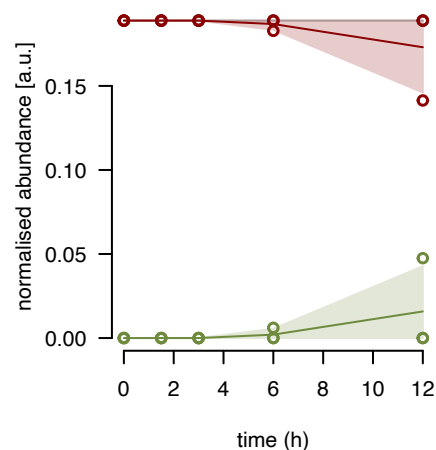**uL2m fraction 16**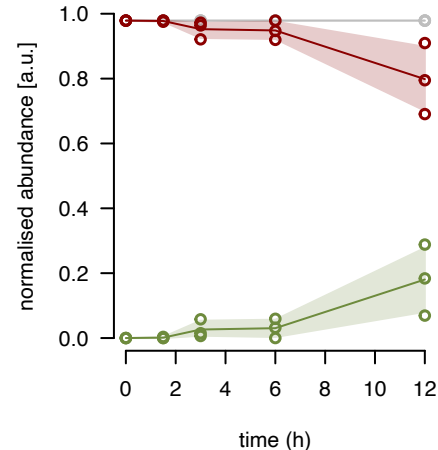

**uL3m fraction 1**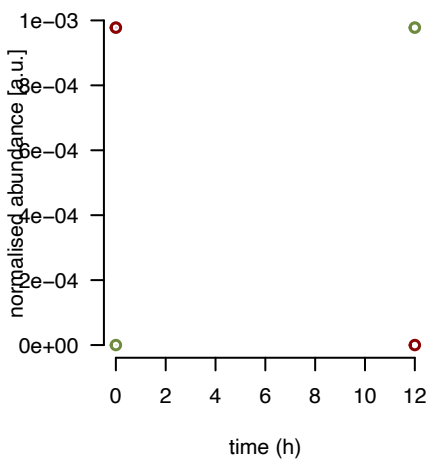**uL3m fraction 2**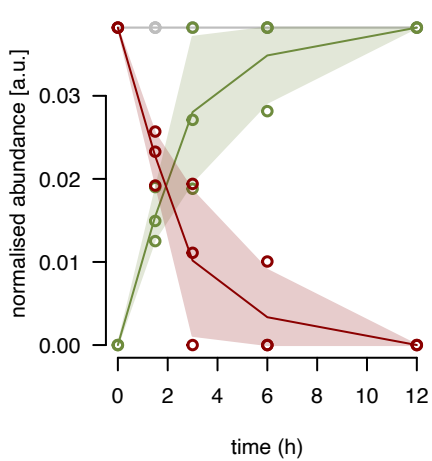**uL3m fraction 3**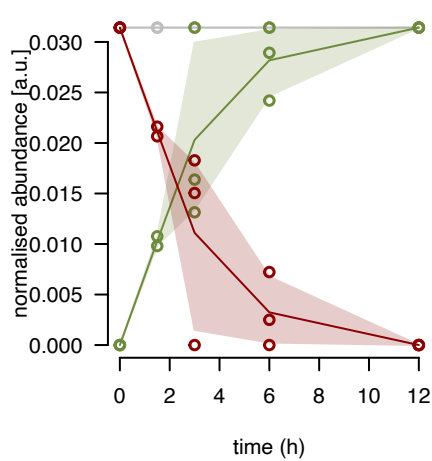**uL3m fraction 4**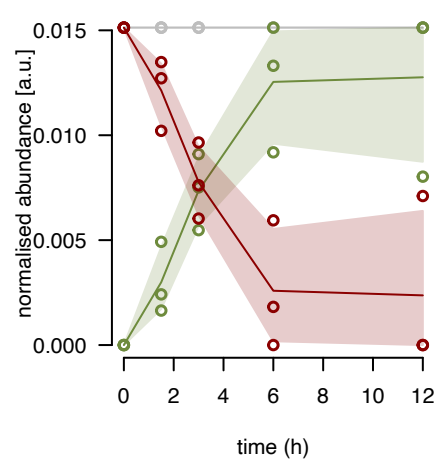**uL3m fraction 5**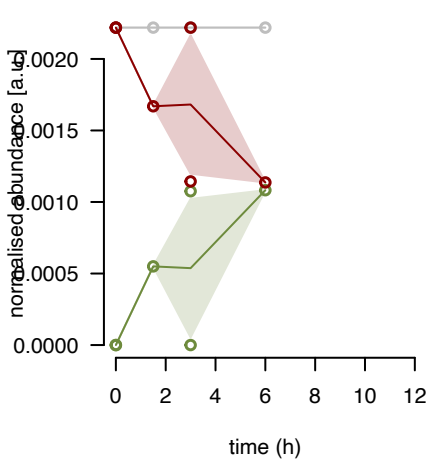**uL3m fraction 6**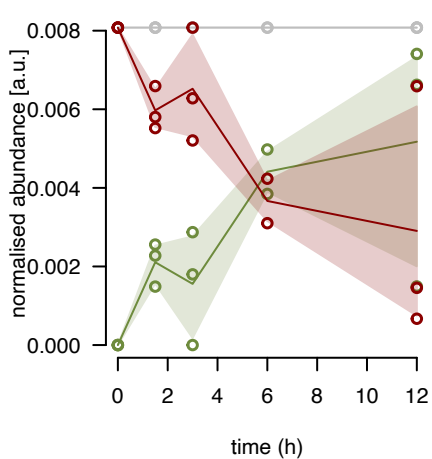**uL3m fraction 7**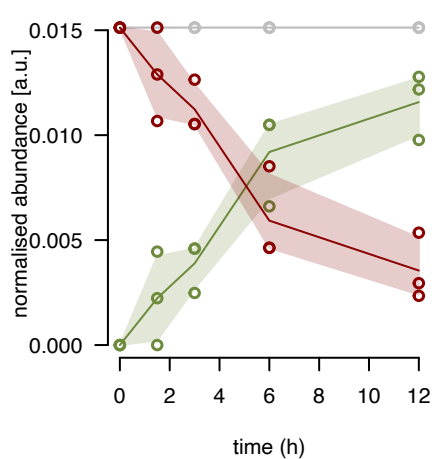**uL3m fraction 8**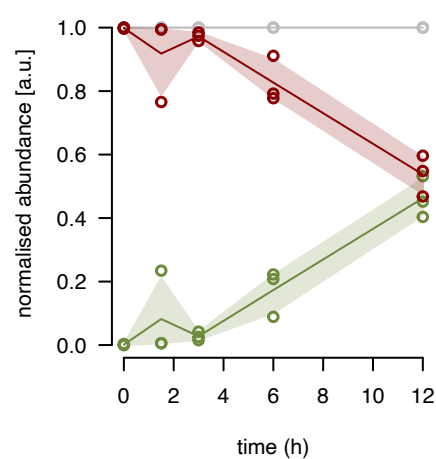**uL3m fraction 9**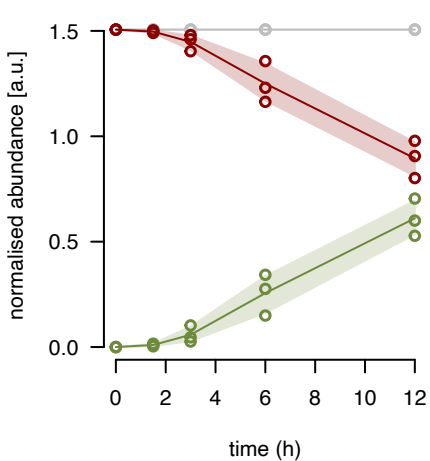**uL3m fraction 10**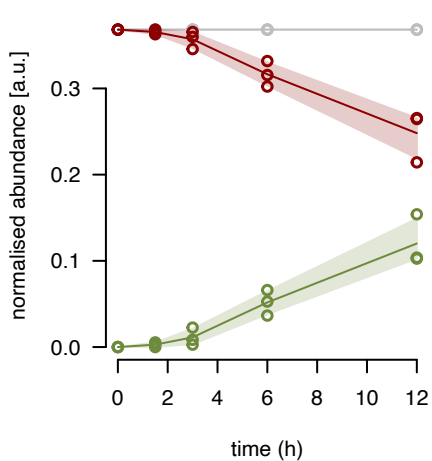**uL3m fraction 11**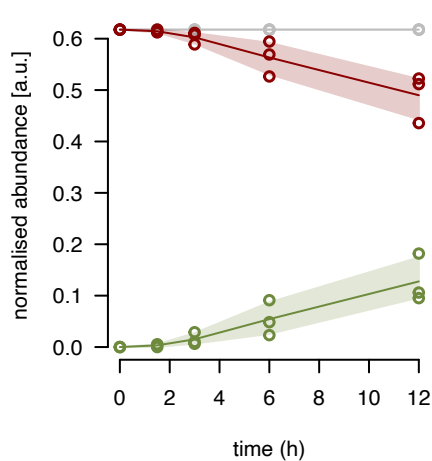**uL3m fraction 12**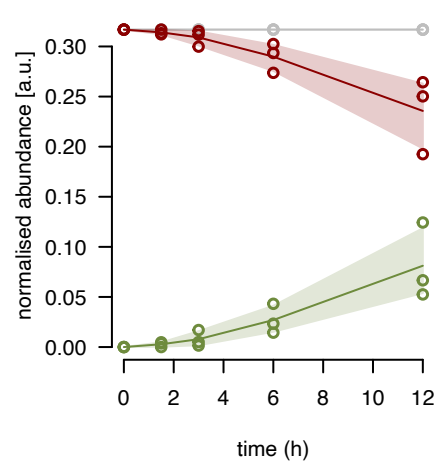**uL3m fraction 13**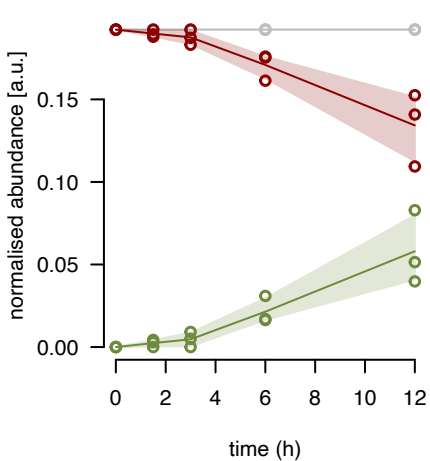**uL3m fraction 14**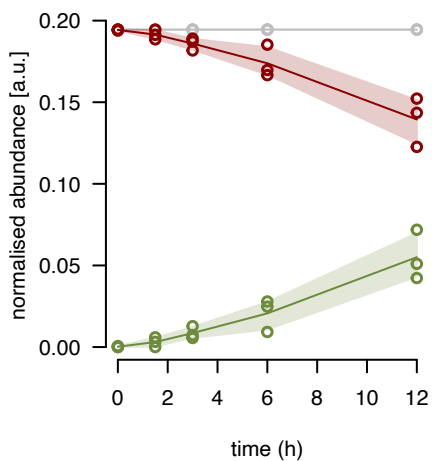**uL3m fraction 15**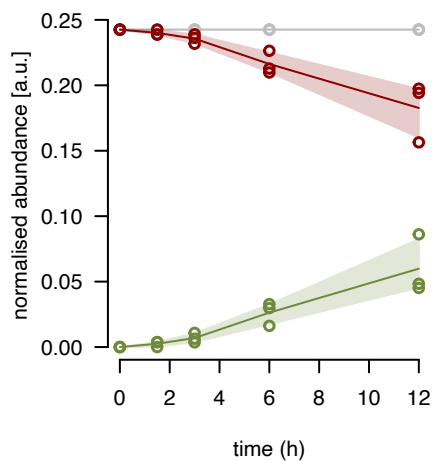**uL3m fraction 16**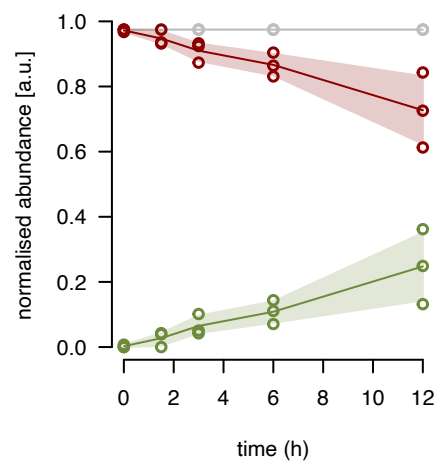

**uL4m fraction 1**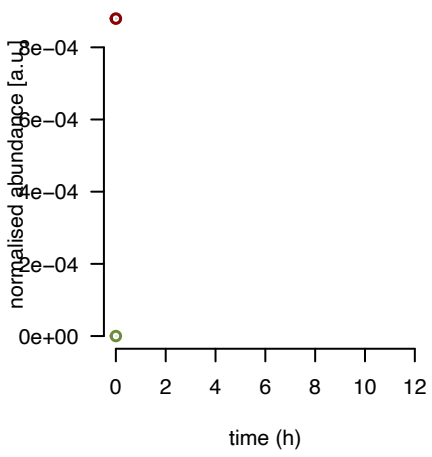**uL4m fraction 2**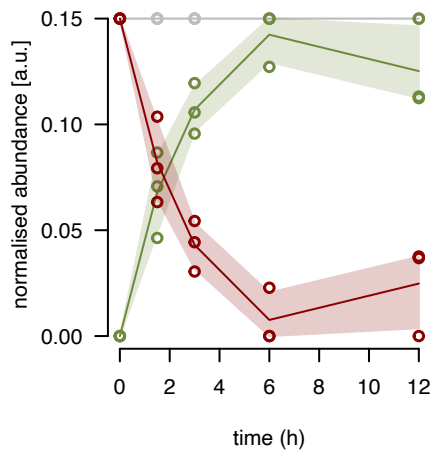**uL4m fraction 3**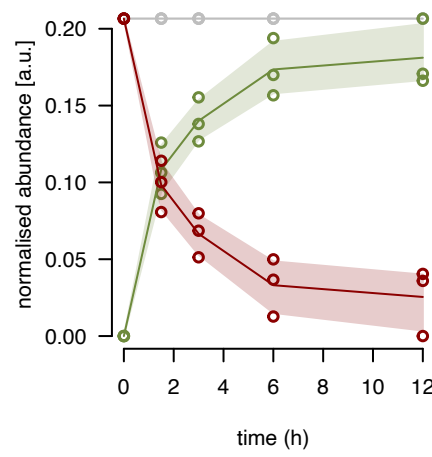**uL4m fraction 4**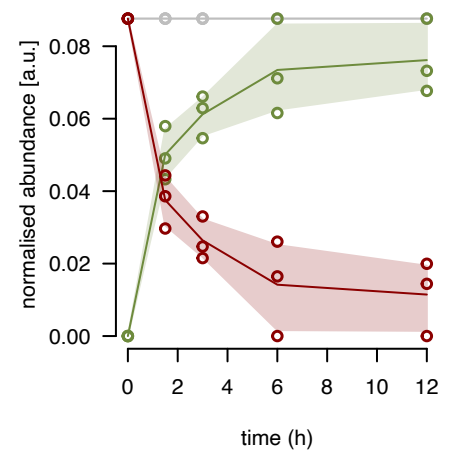**uL4m fraction 5**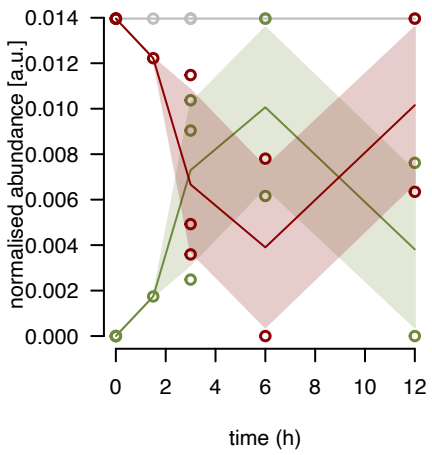**uL4m fraction 6**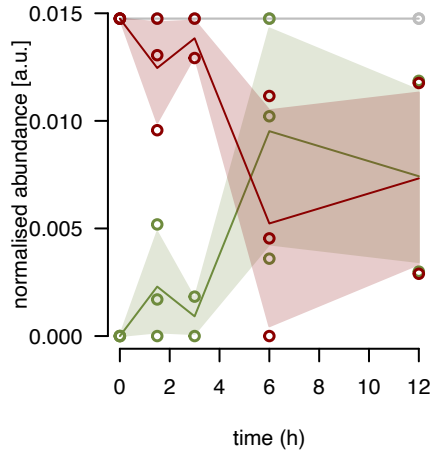**uL4m fraction 7**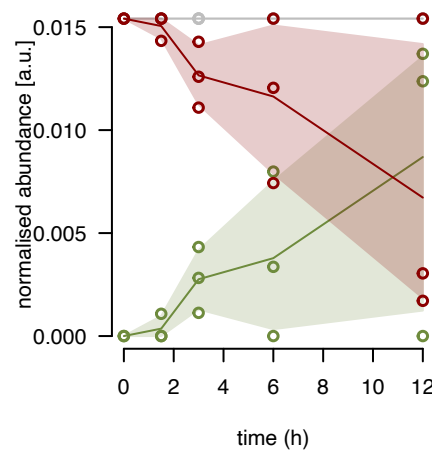**uL4m fraction 8**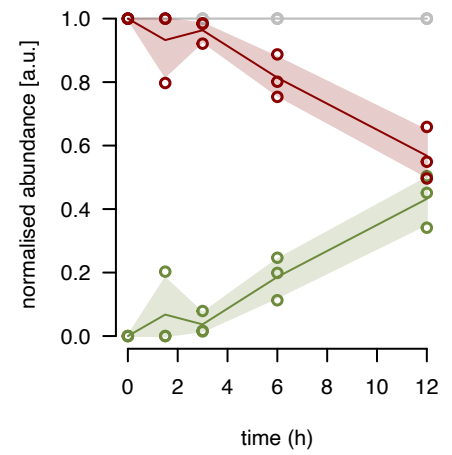**uL4m fraction 9**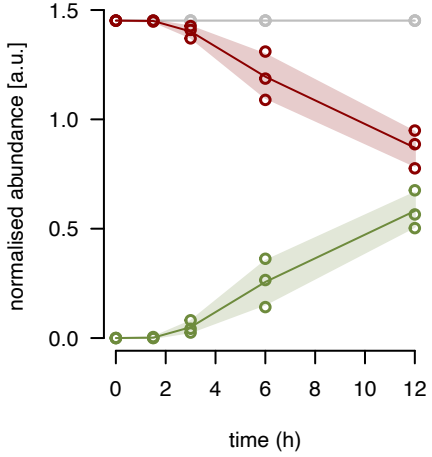**uL4m fraction 10**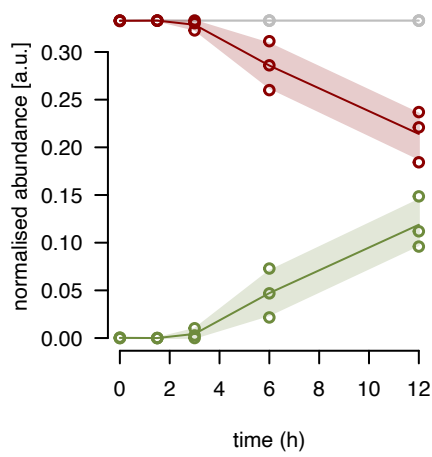**uL4m fraction 11**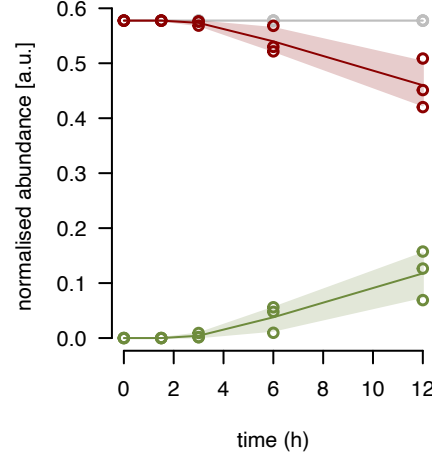**uL4m fraction 12**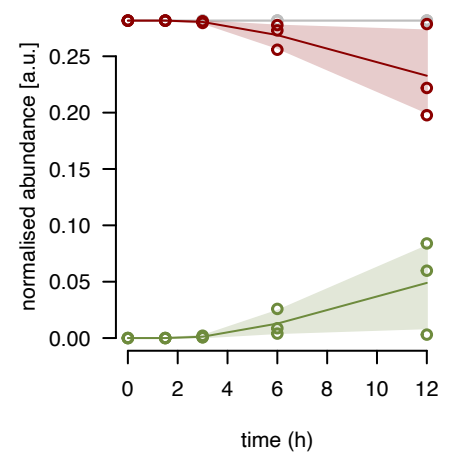**uL4m fraction 13**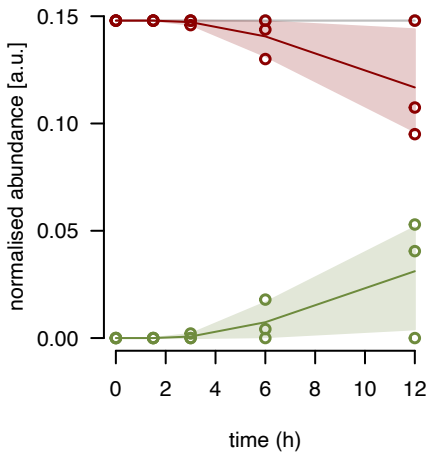**uL4m fraction 14**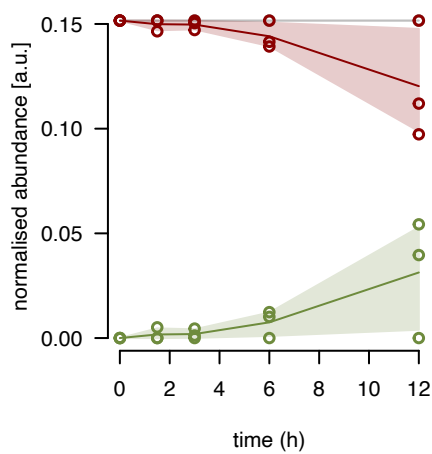**uL4m fraction 15**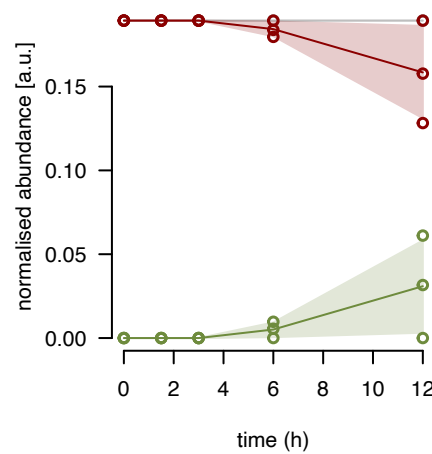**uL4m fraction 16**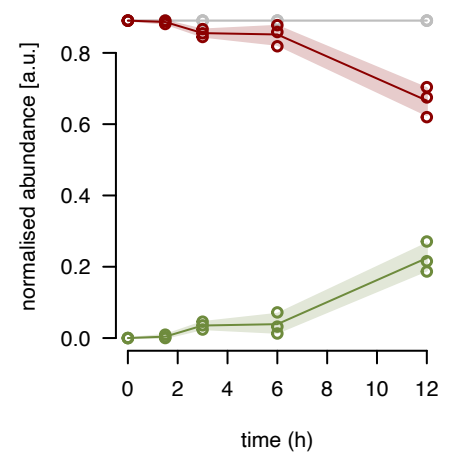

**bL9m fraction 1**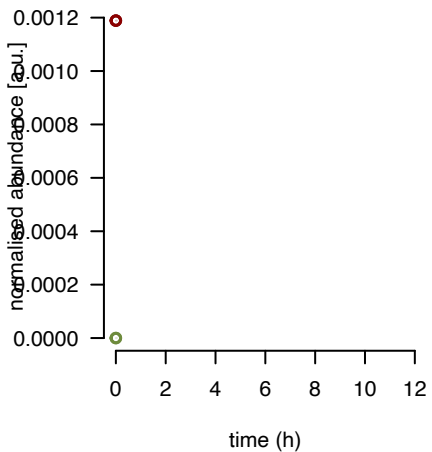**bL9m fraction 2**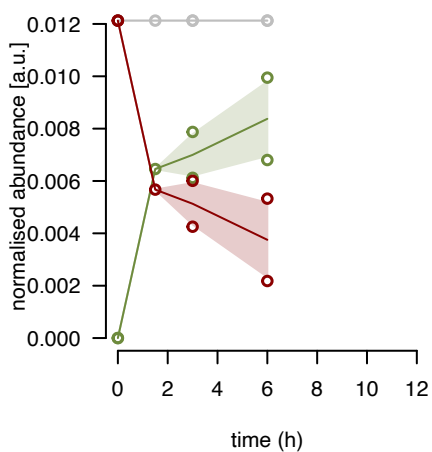**bL9m fraction 3**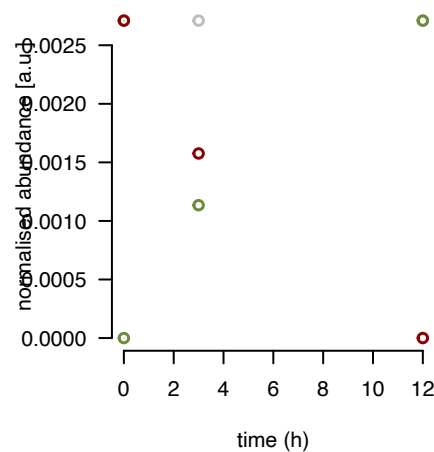**bL9m fraction 4**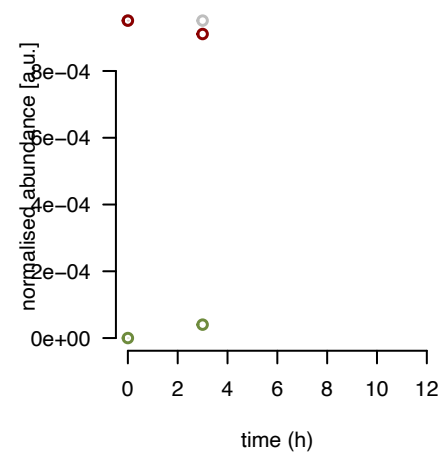**bL9m fraction 5**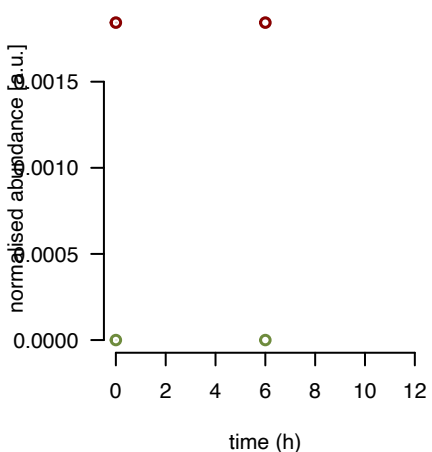**bL9m fraction 6**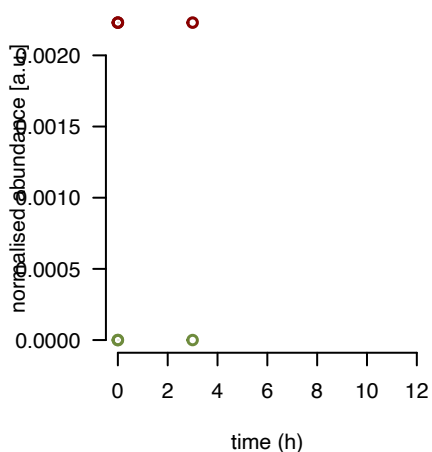**bL9m fraction 7**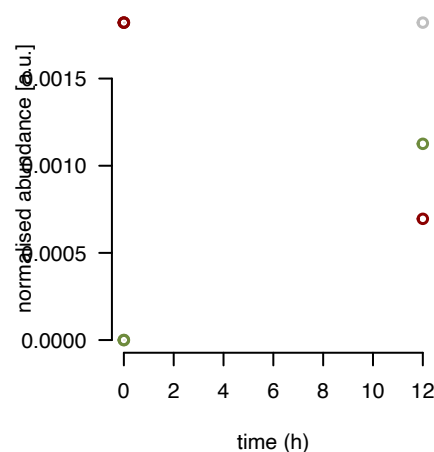**bL9m fraction 8**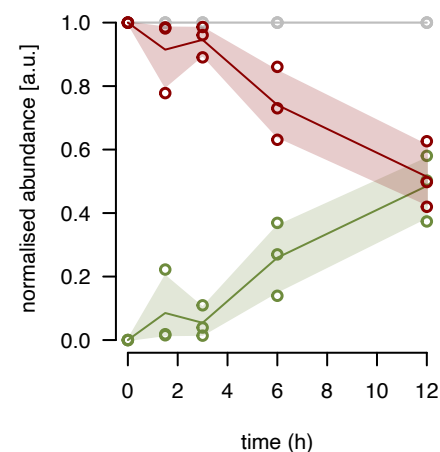**bL9m fraction 9**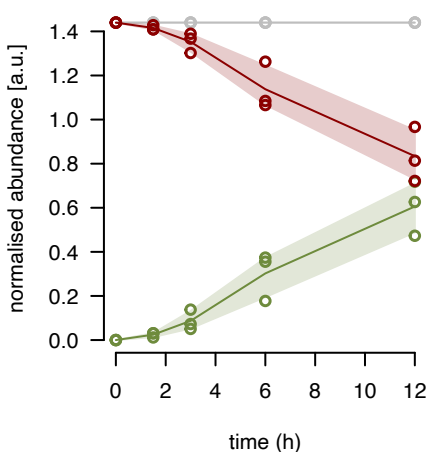**bL9m fraction 10**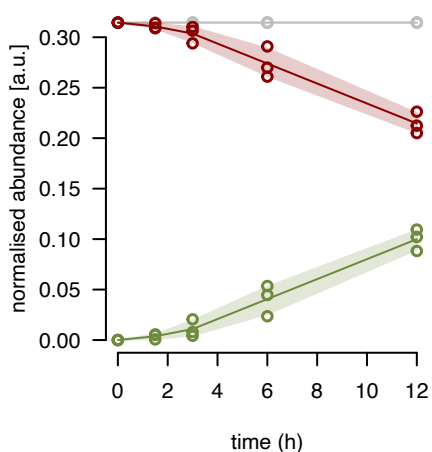**bL9m fraction 11**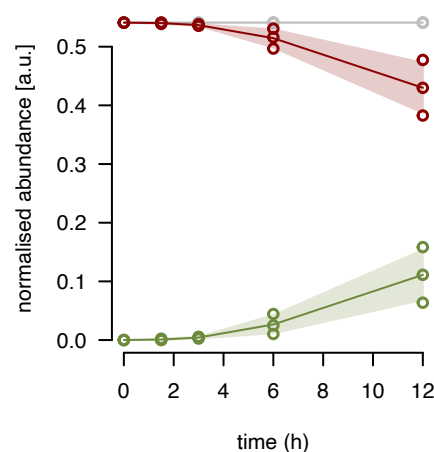**bL9m fraction 12**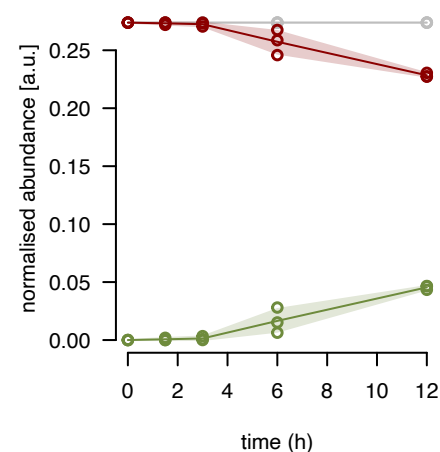**bL9m fraction 13**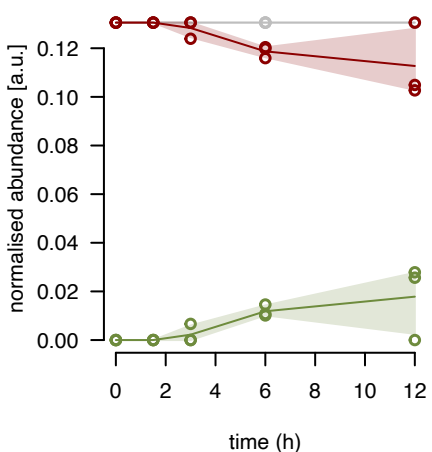**bL9m fraction 14**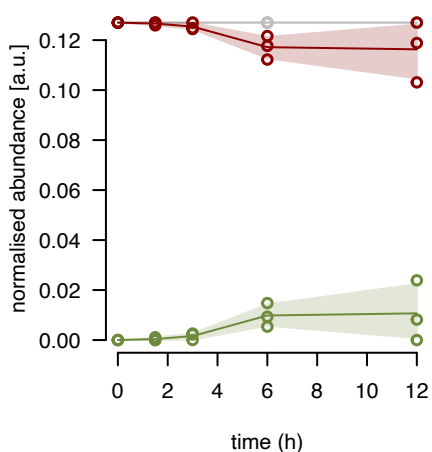**bL9m fraction 15**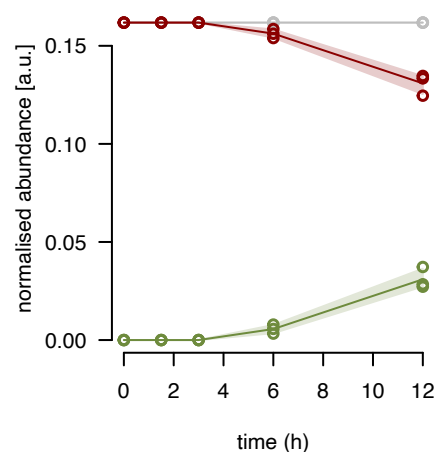**bL9m fraction 16**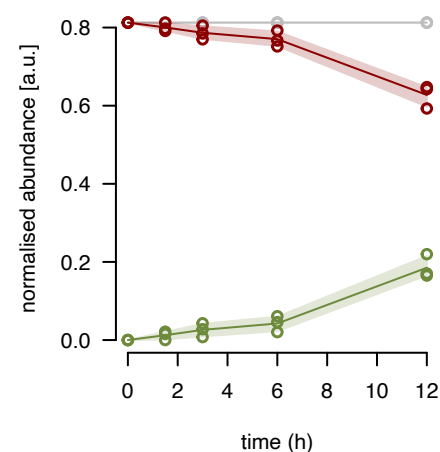

**uL10m fraction 1**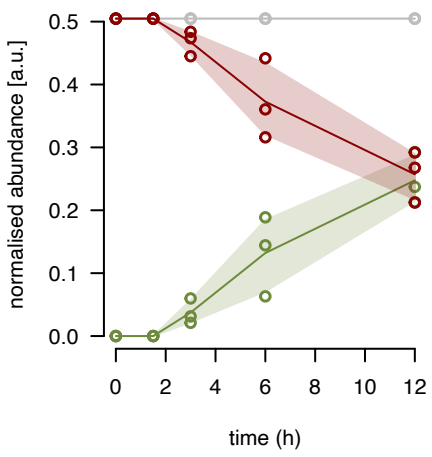**uL10m fraction 2**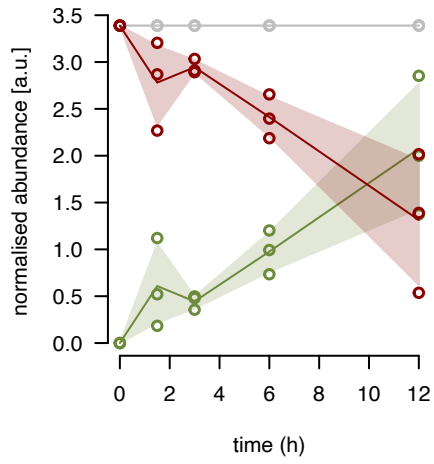**uL10m fraction 3**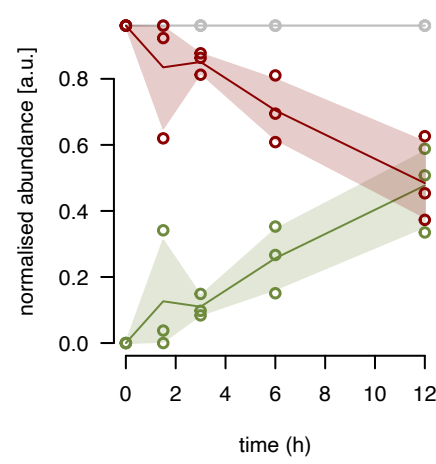**uL10m fraction 4**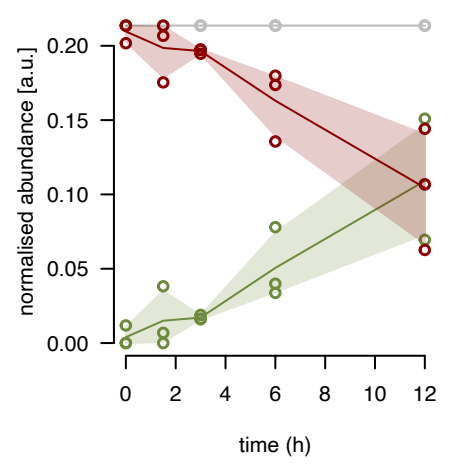**uL10m fraction 5**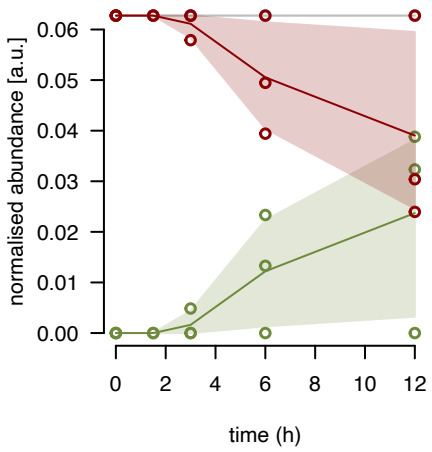**uL10m fraction 6**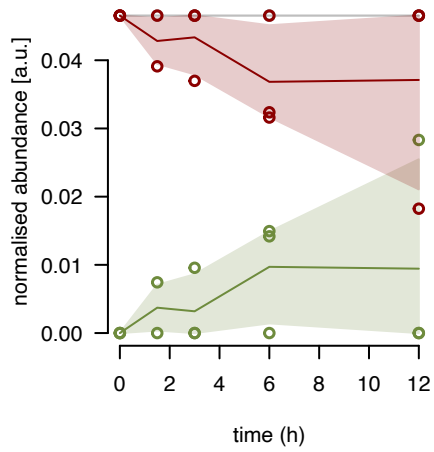**uL10m fraction 7**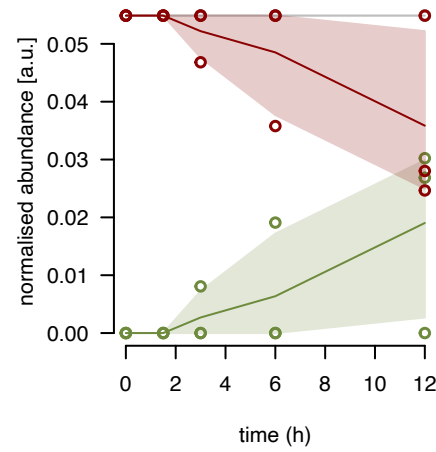**uL10m fraction 8**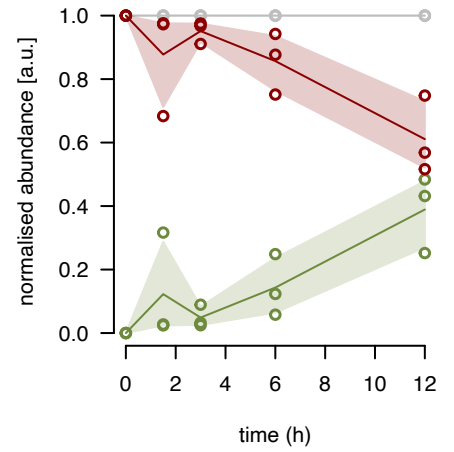**uL10m fraction 9**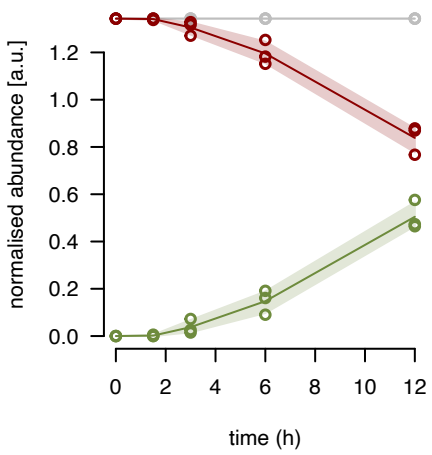**uL10m fraction 10**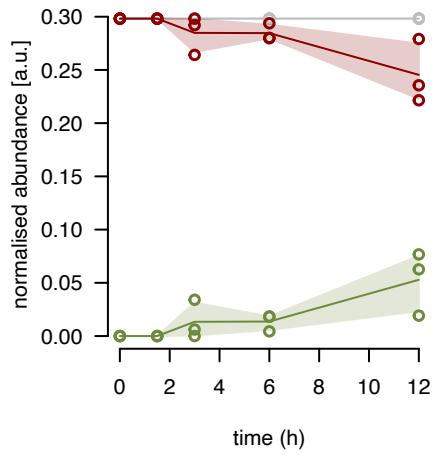**uL10m fraction 11**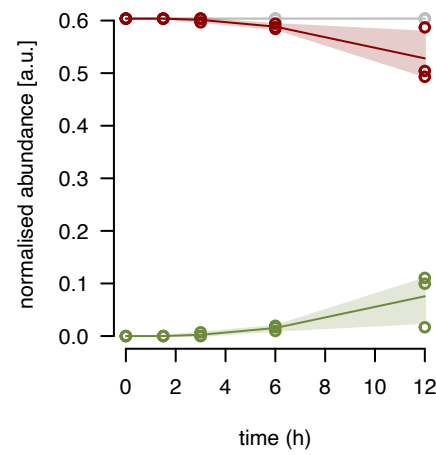**uL10m fraction 12**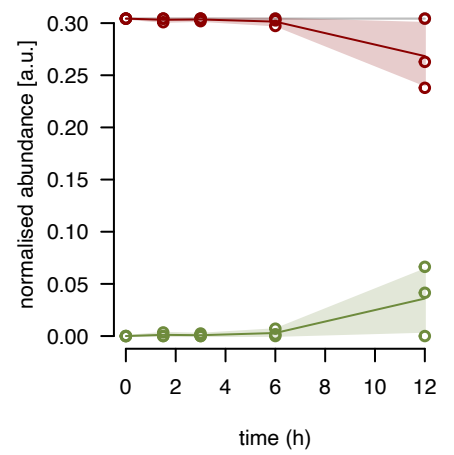**uL10m fraction 13**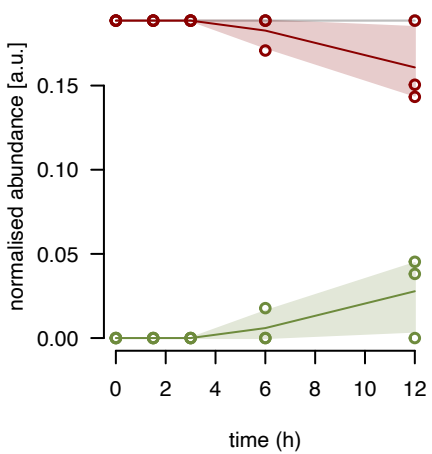**uL10m fraction 14**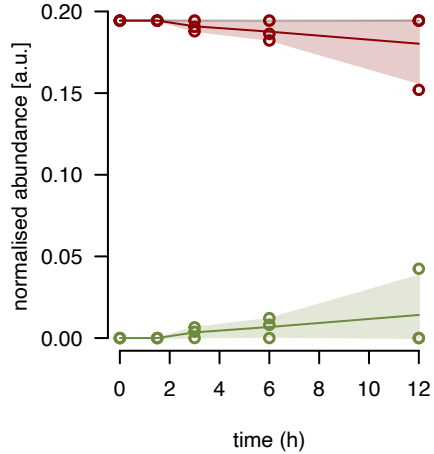**uL10m fraction 15**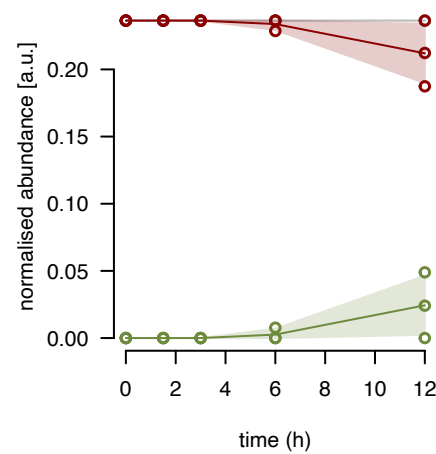**uL10m fraction 16**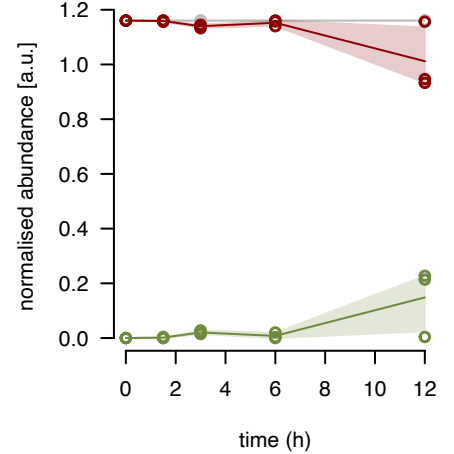

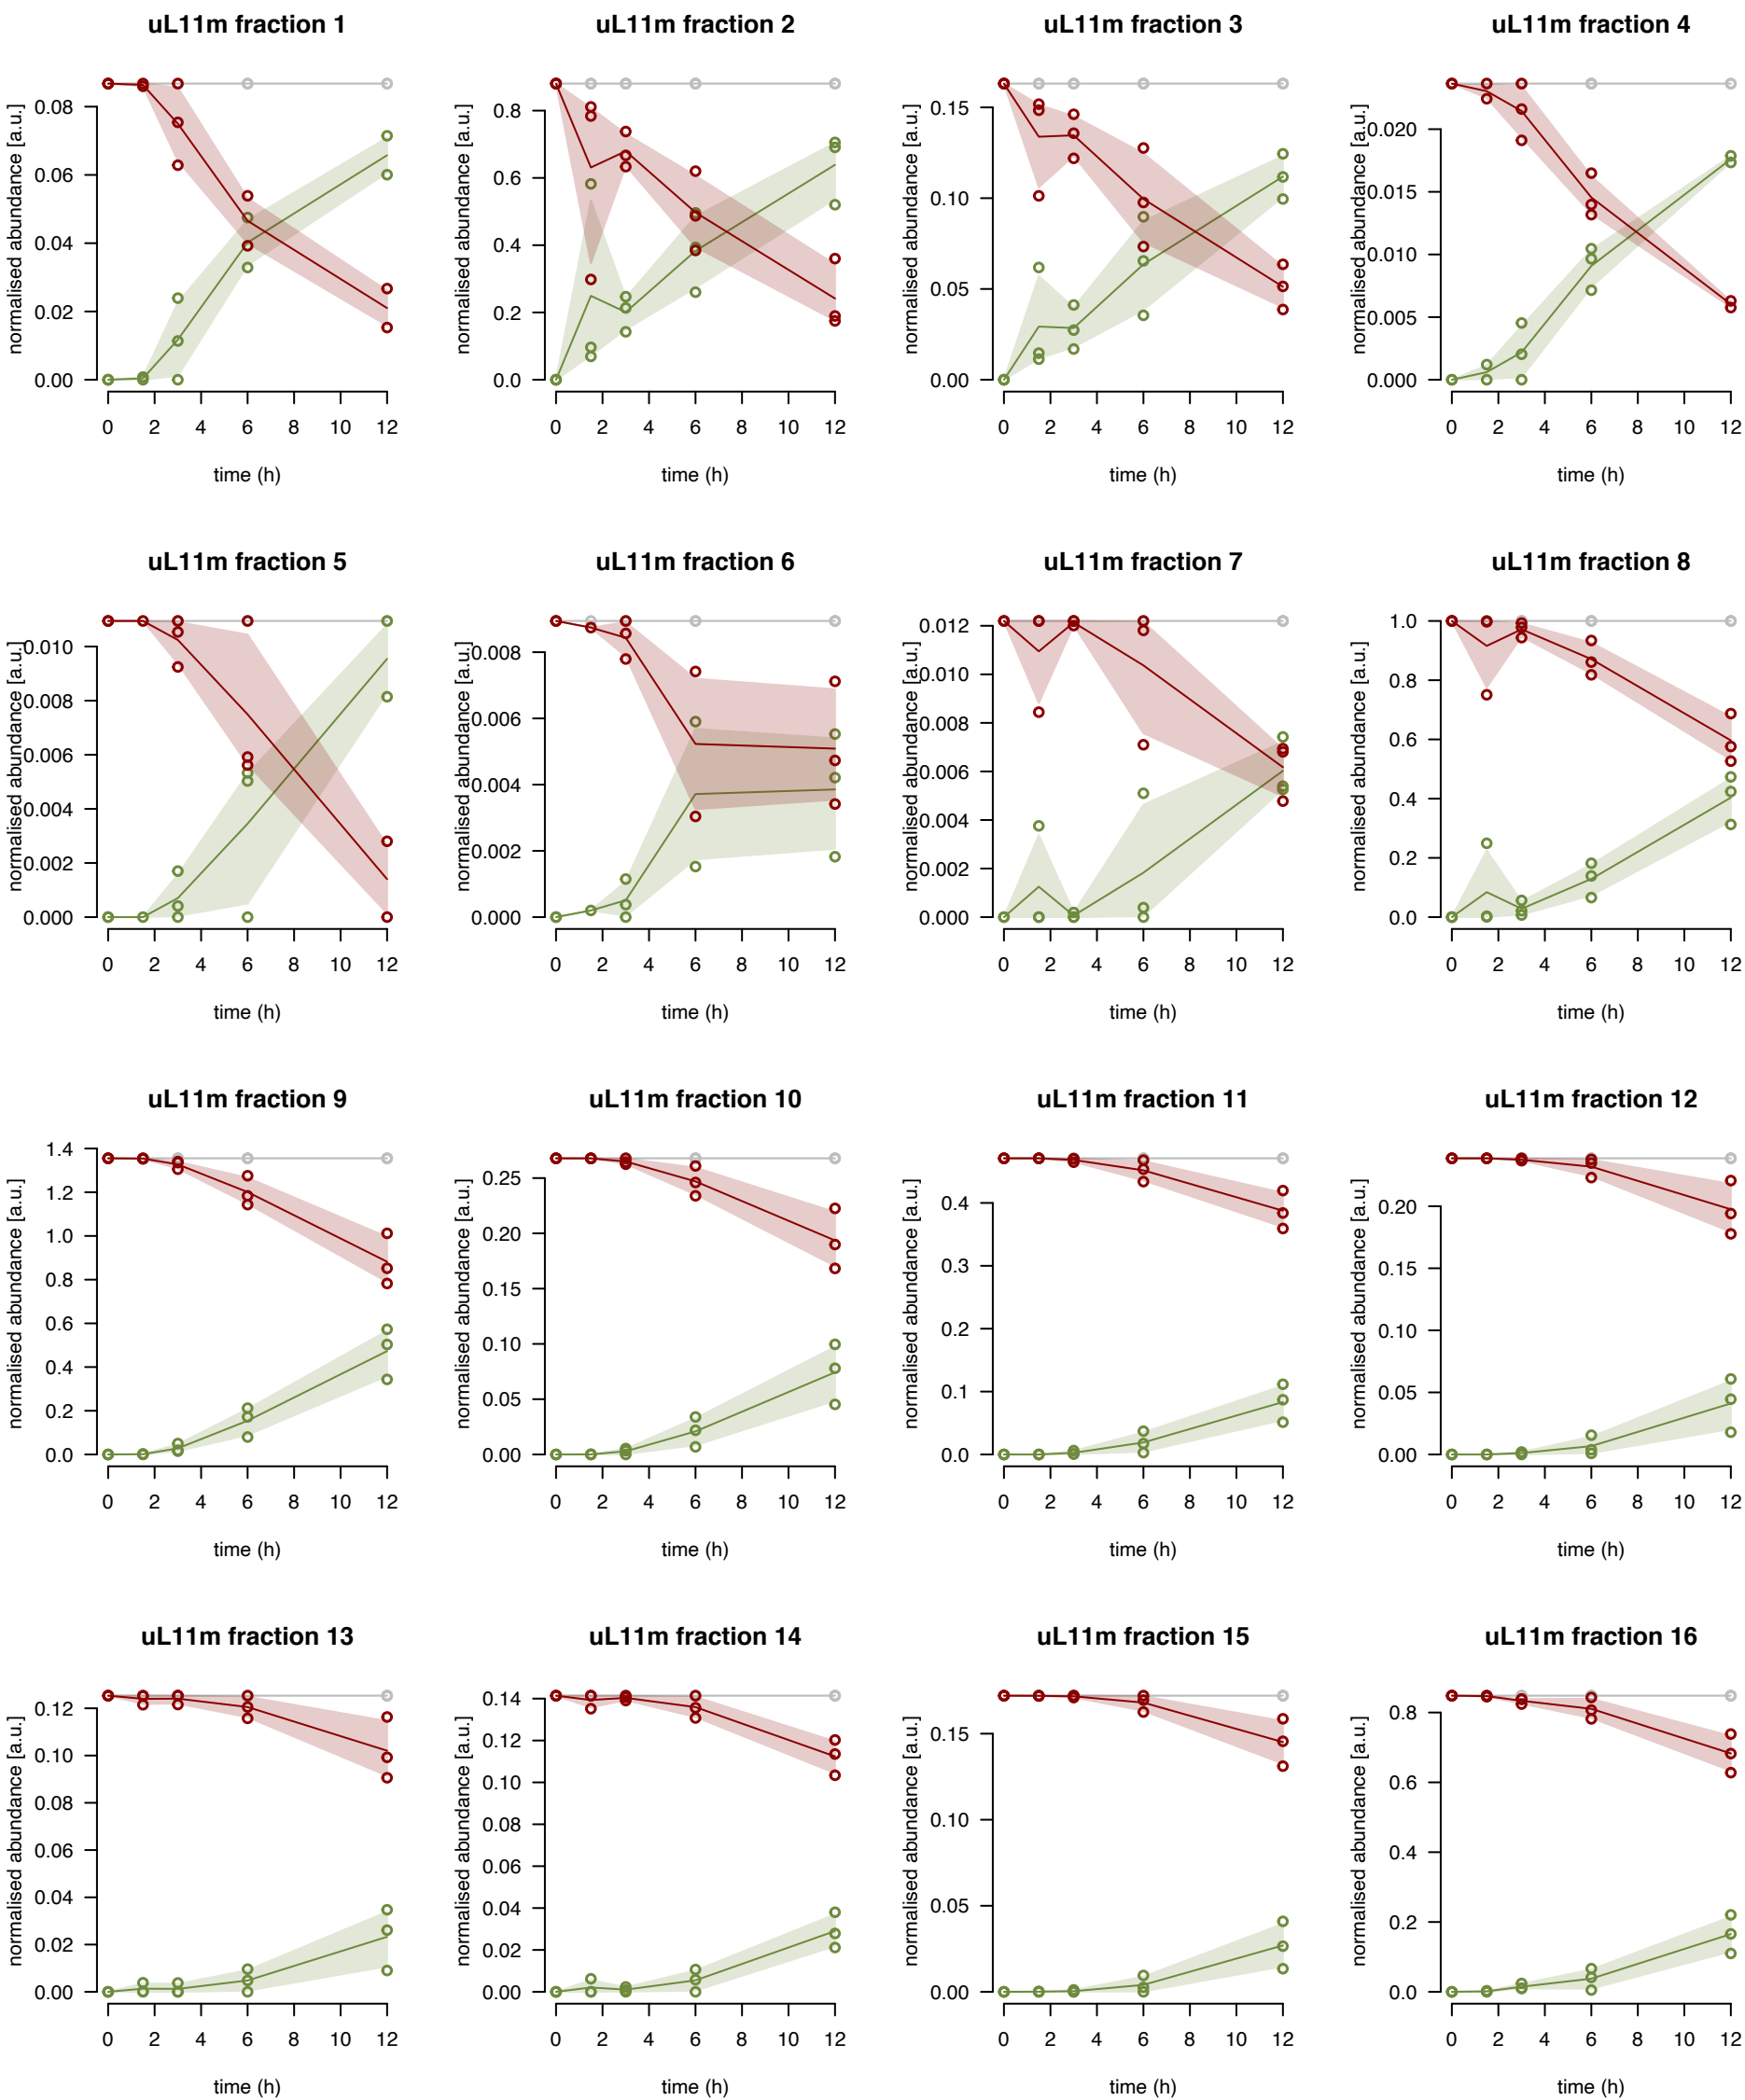





**uL13m fraction 1**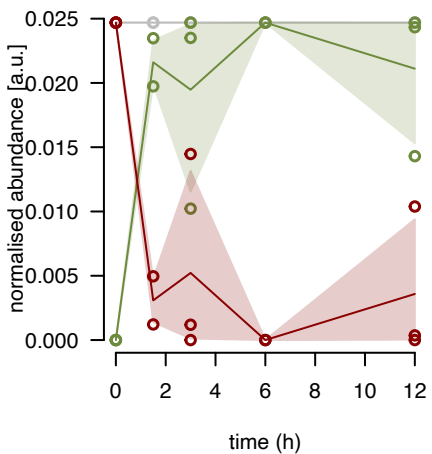**uL13m fraction 2**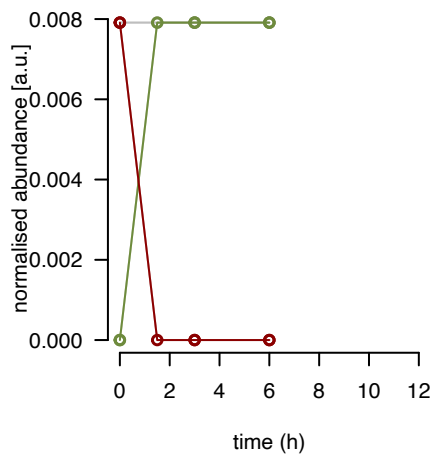**uL13m fraction 3**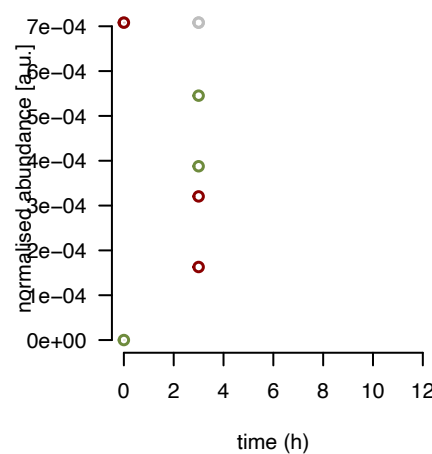**uL13m fraction 4**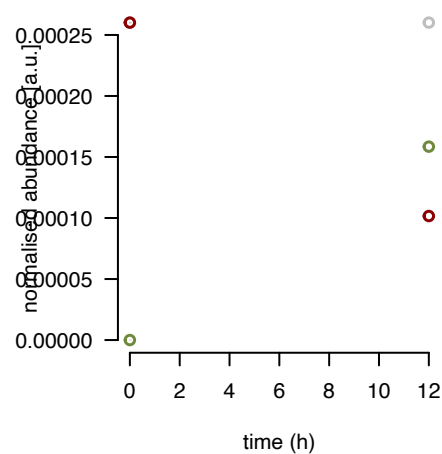**uL13m fraction 5**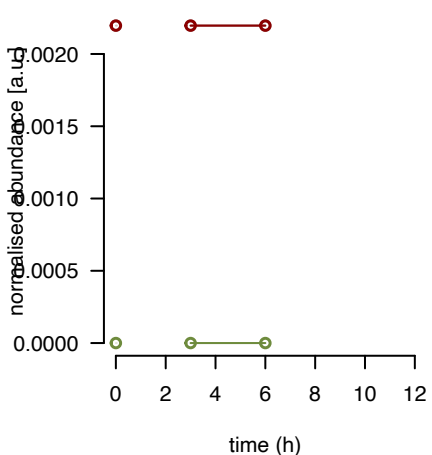**uL13m fraction 6**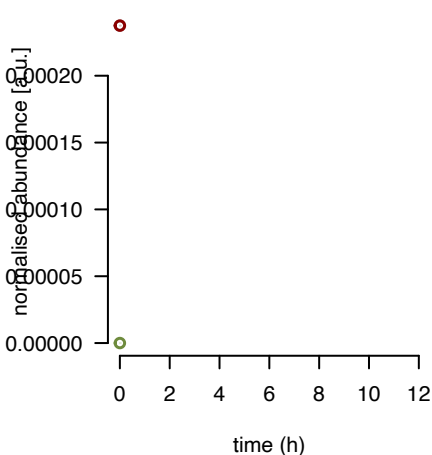**uL13m fraction 7**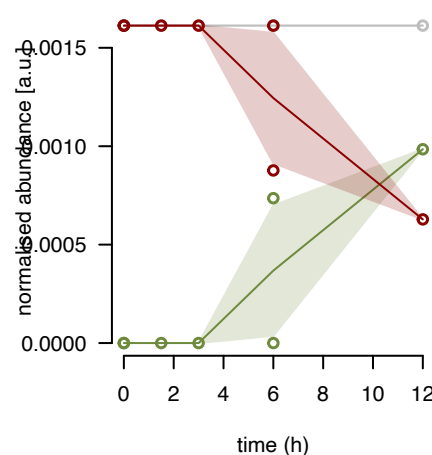**uL13m fraction 8**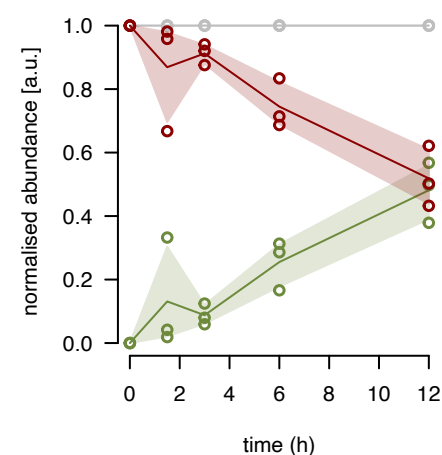**uL13m fraction 9**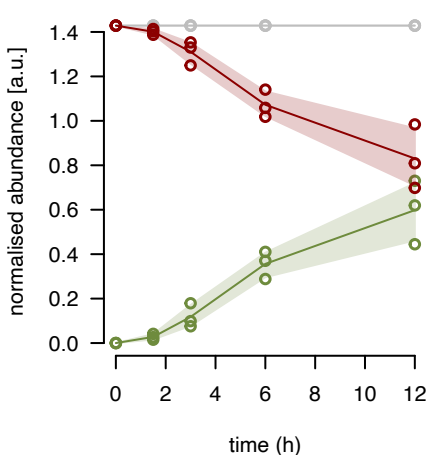**uL13m fraction 10**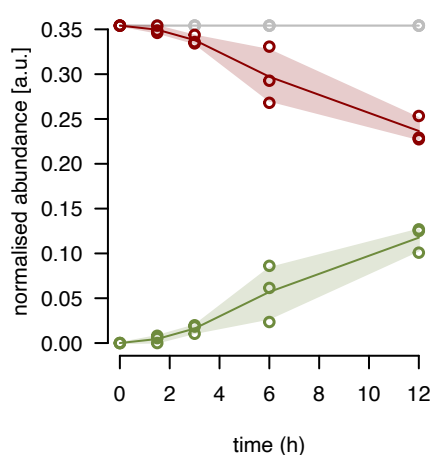**uL13m fraction 11**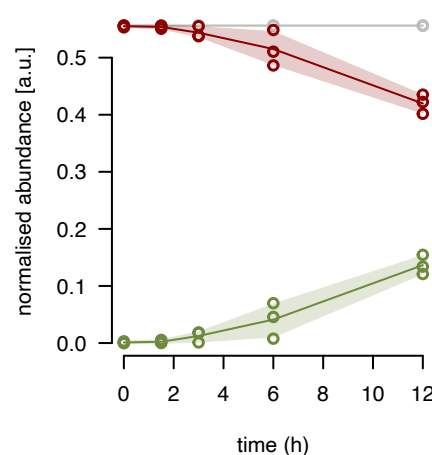**uL13m fraction 12**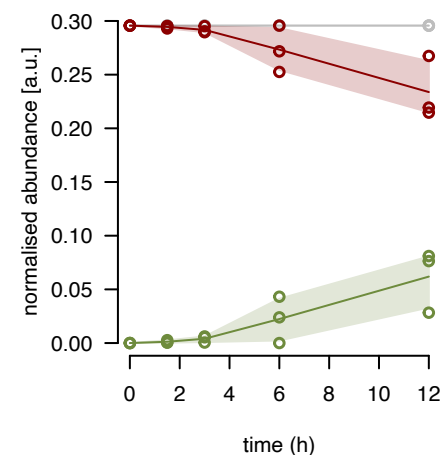**uL13m fraction 13**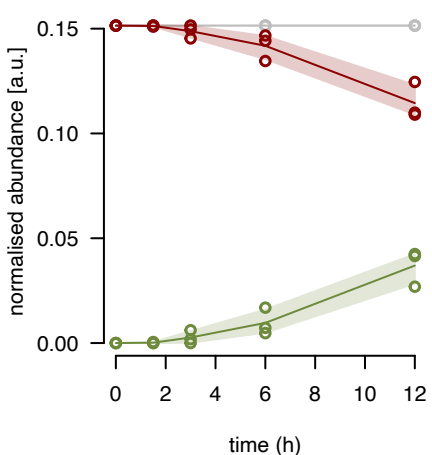**uL13m fraction 14**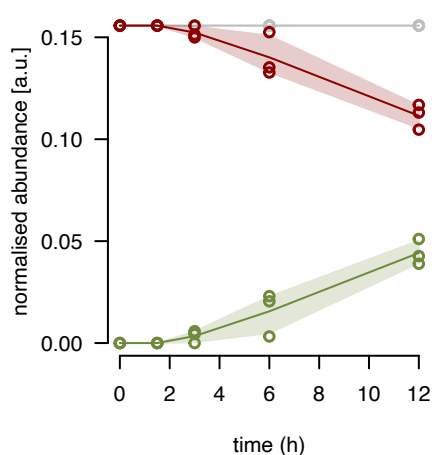**uL13m fraction 15**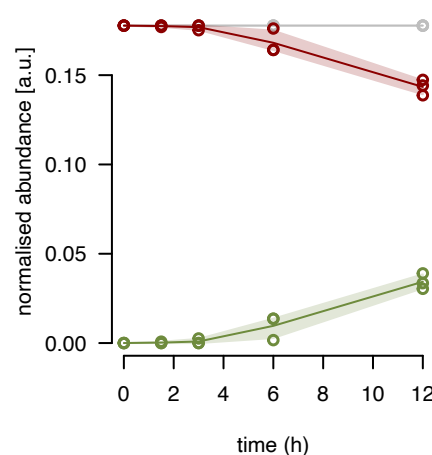**uL13m fraction 16**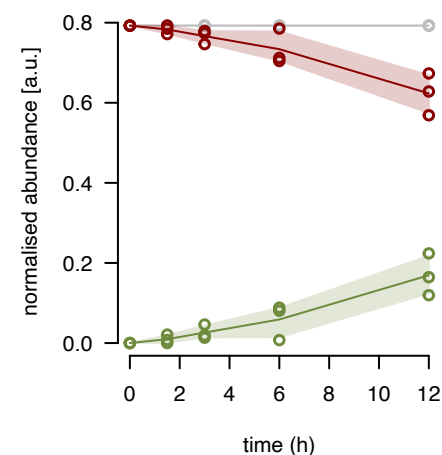

**uL14m fraction 1**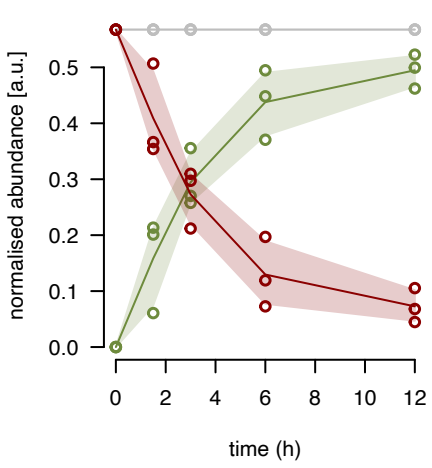**uL14m fraction 2**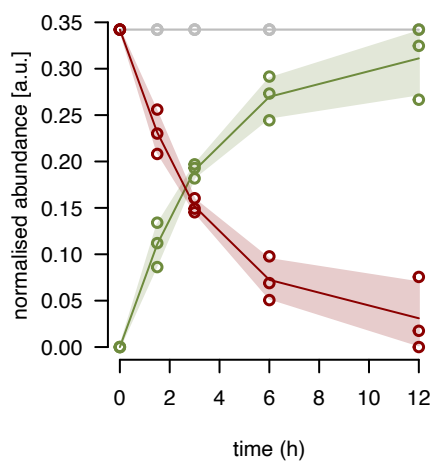**uL14m fraction 3**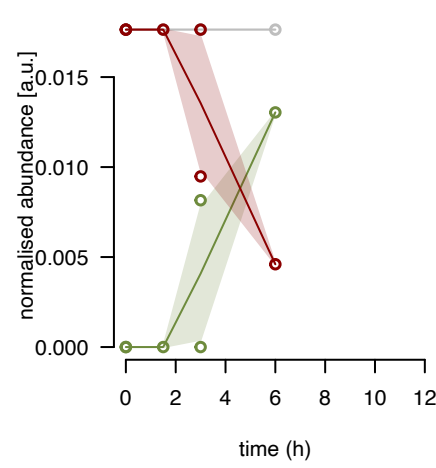**uL14m fraction 4**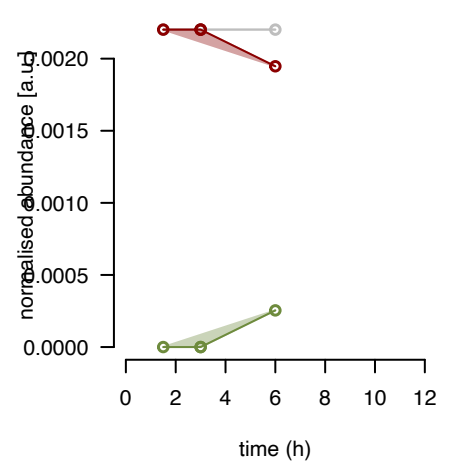**uL14m fraction 5**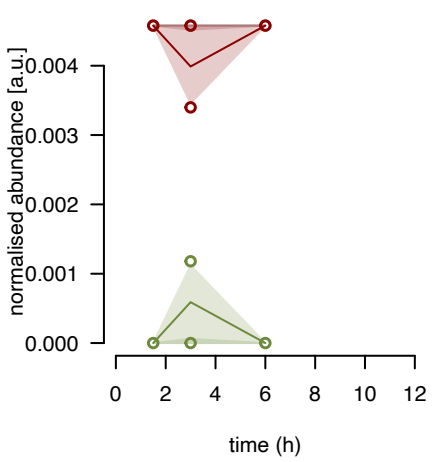**uL14m fraction 6**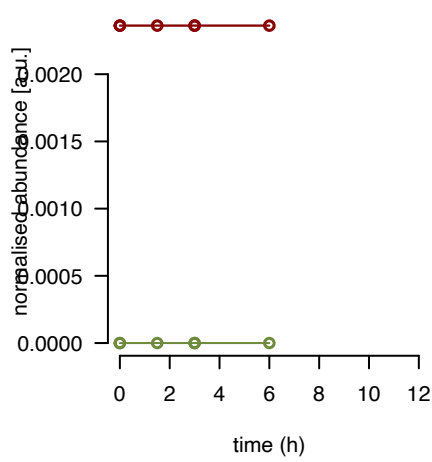**uL14m fraction 7**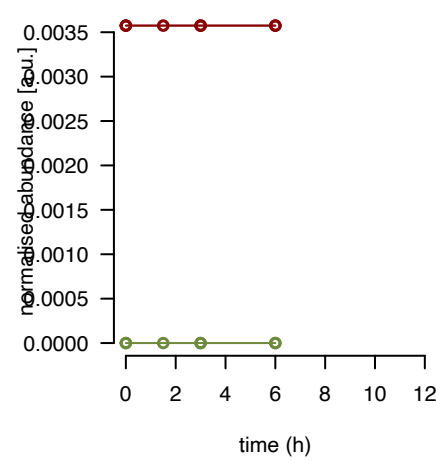**uL14m fraction 8**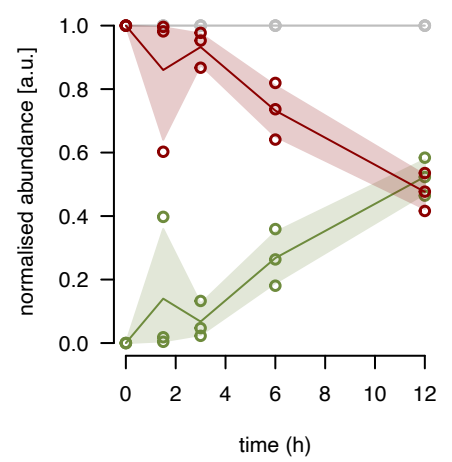**uL14m fraction 9**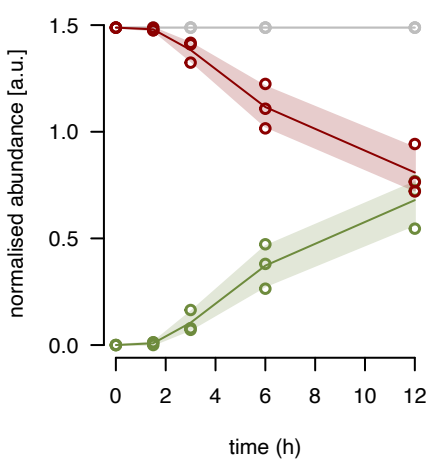**uL14m fraction 10**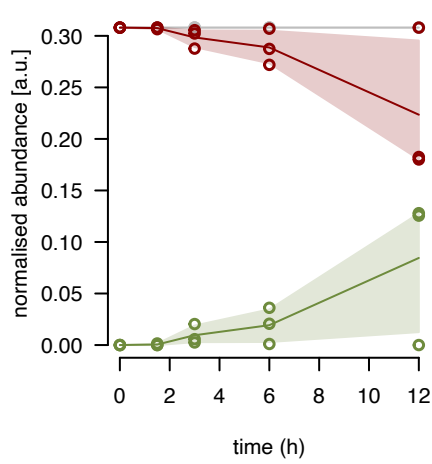**uL14m fraction 11**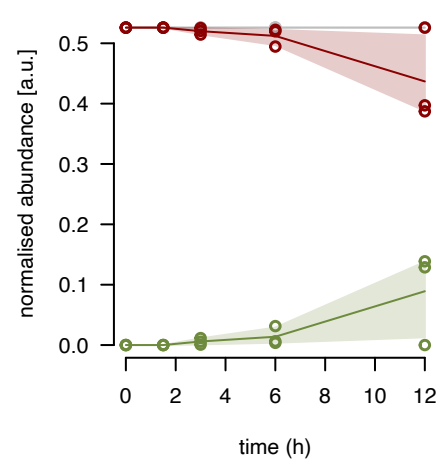**uL14m fraction 12**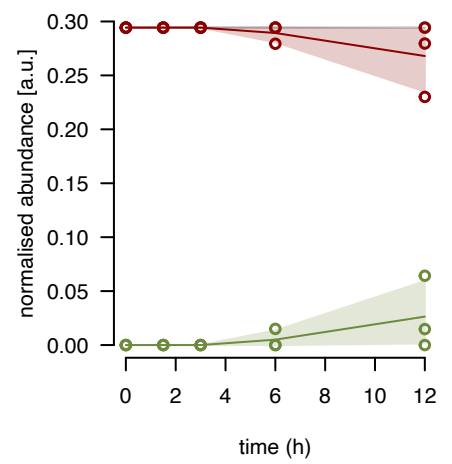**uL14m fraction 13**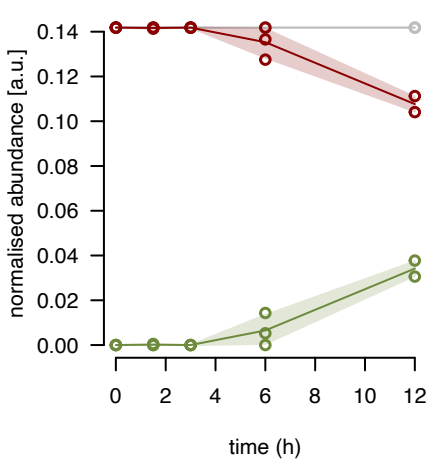**uL14m fraction 14**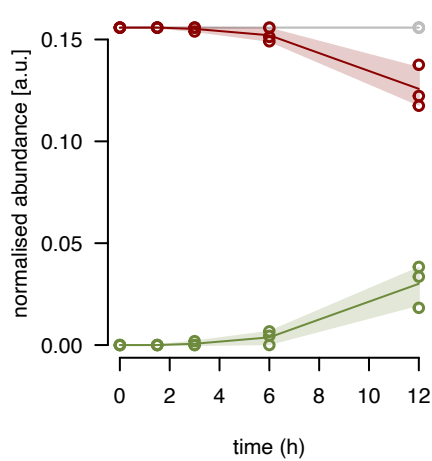**uL14m fraction 15**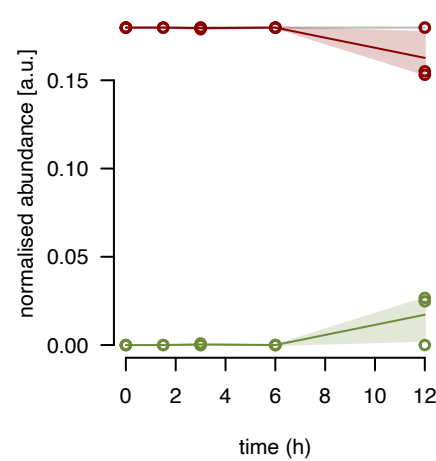**uL14m fraction 16**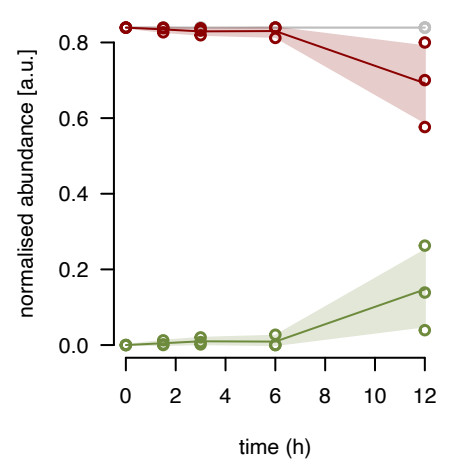



**uL16m fraction 1**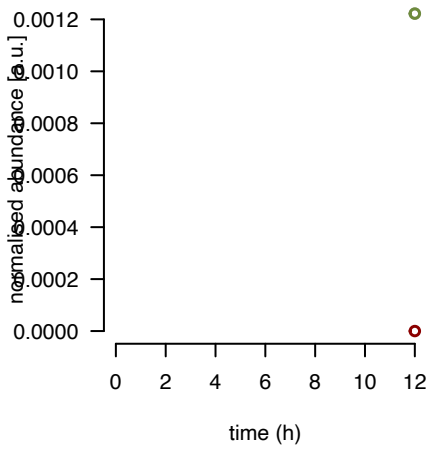**uL16m fraction 2**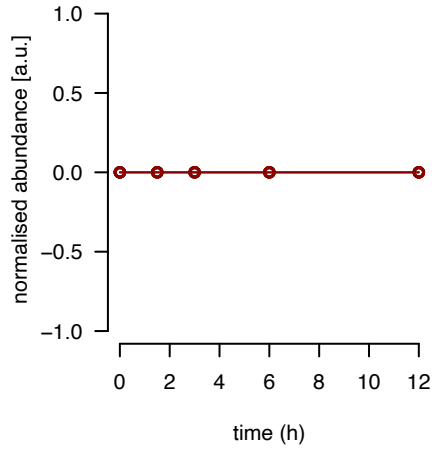**uL16m fraction 3**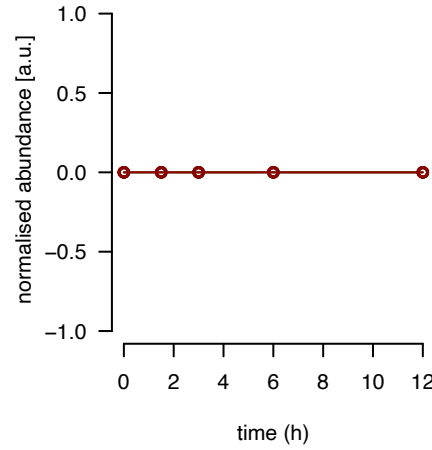**uL16m fraction 4**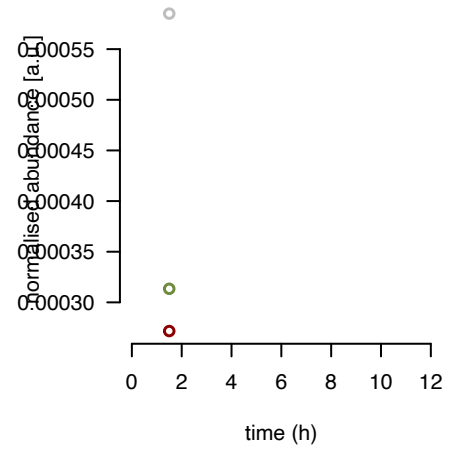**uL16m fraction 5**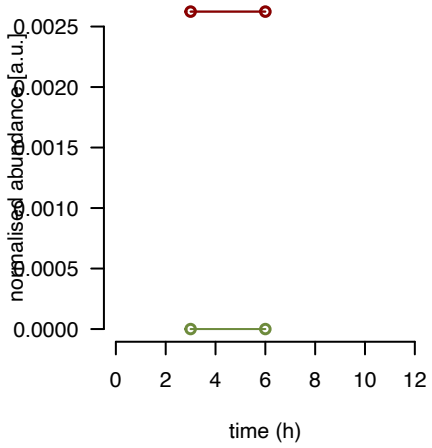**uL16m fraction 6**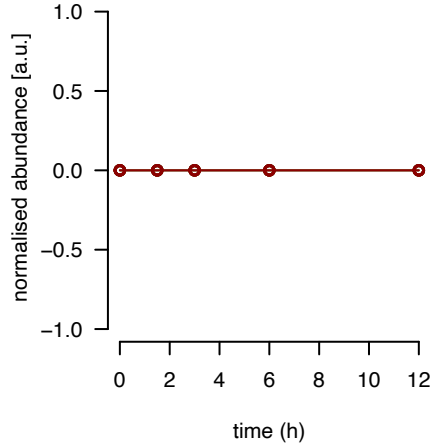**uL16m fraction 7**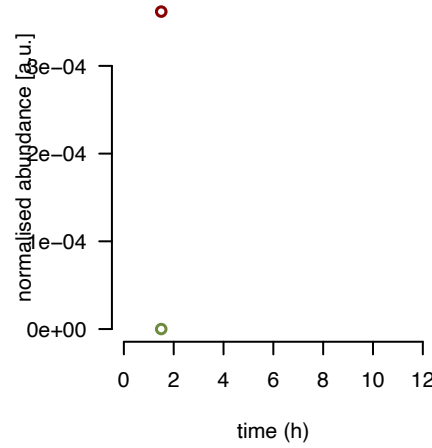**uL16m fraction 8**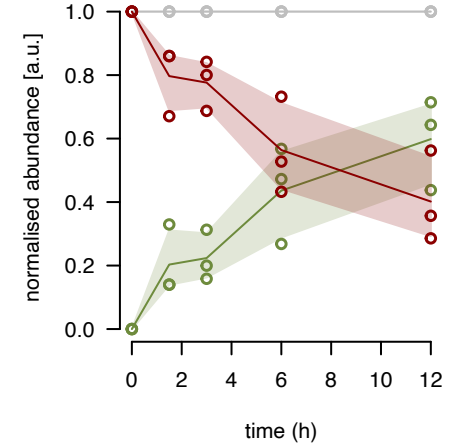**uL16m fraction 9**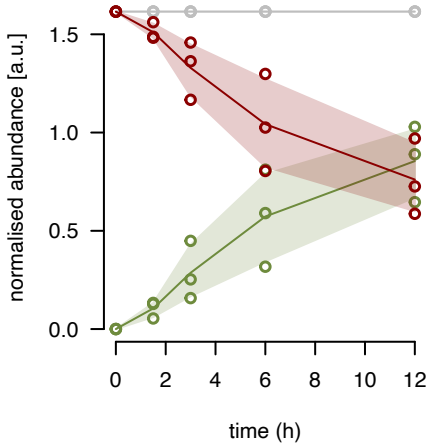**uL16m fraction 10**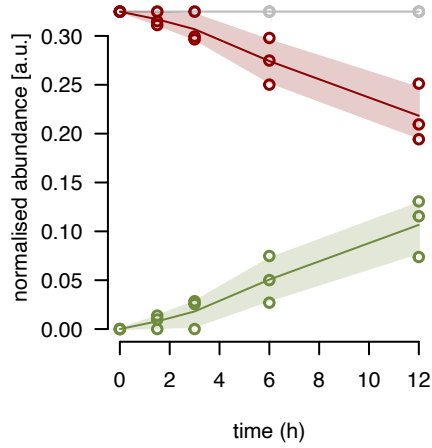**uL16m fraction 11**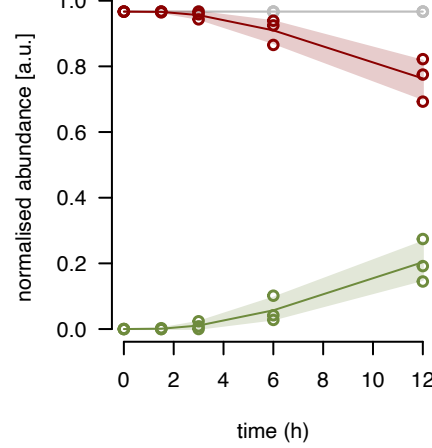**uL16m fraction 12**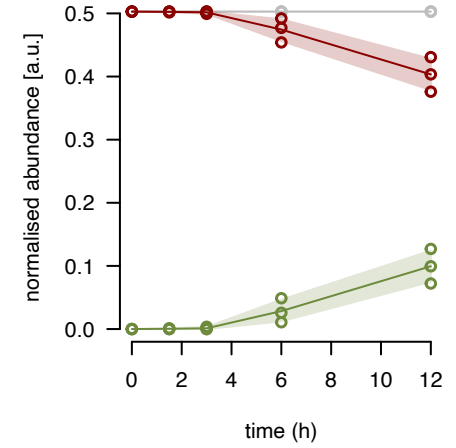**uL16m fraction 13**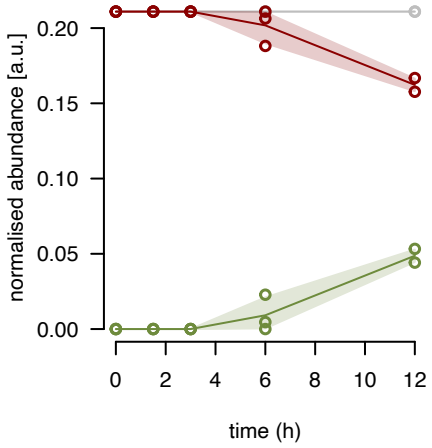**uL16m fraction 14**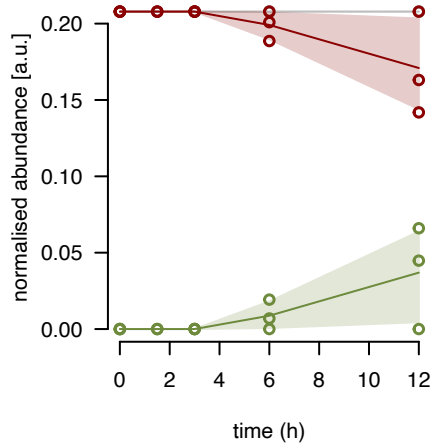**uL16m fraction 15**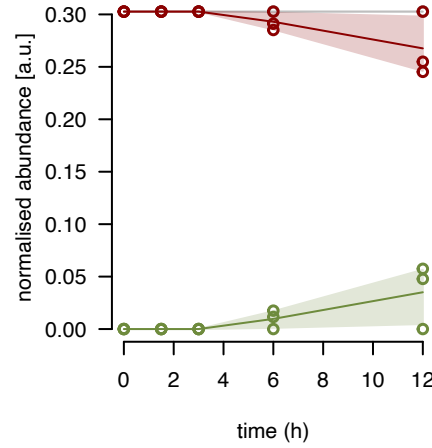**uL16m fraction 16**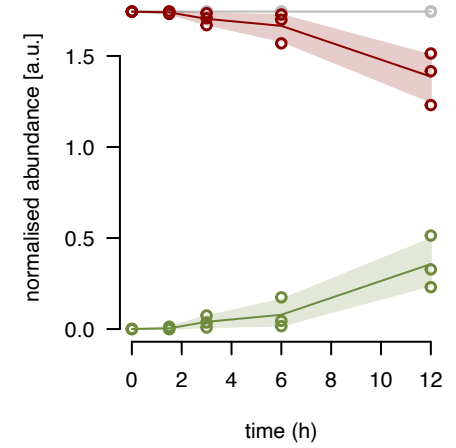

**bL17m fraction 1**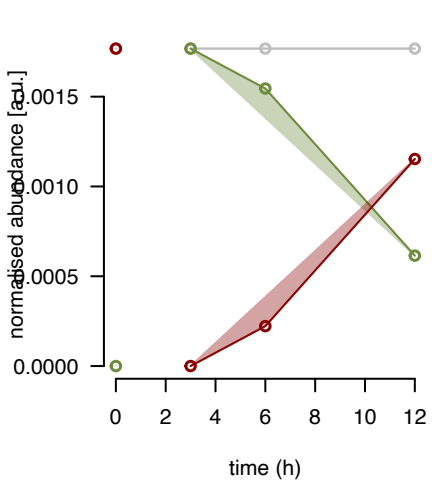**bL17m fraction 2**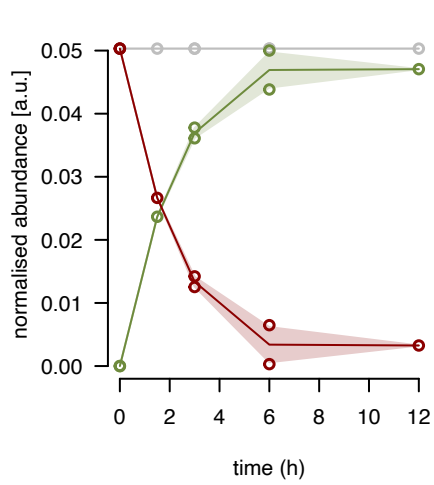**bL17m fraction 3**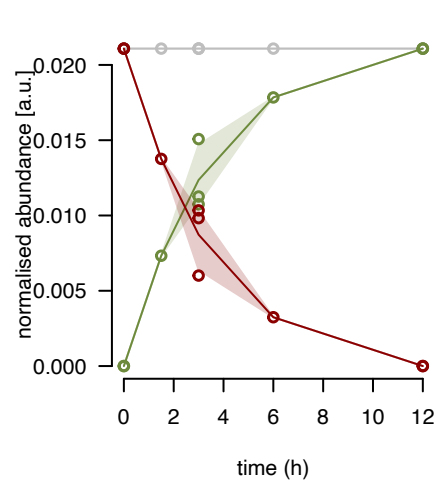**bL17m fraction 4**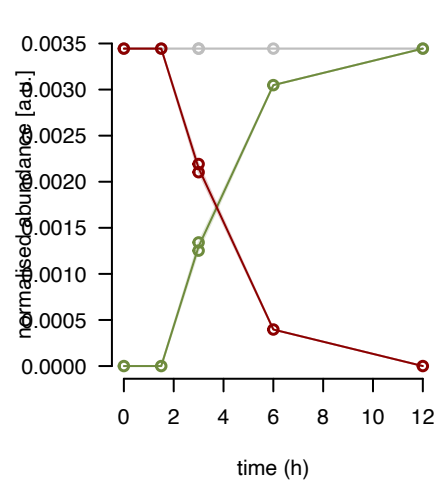**bL17m fraction 5**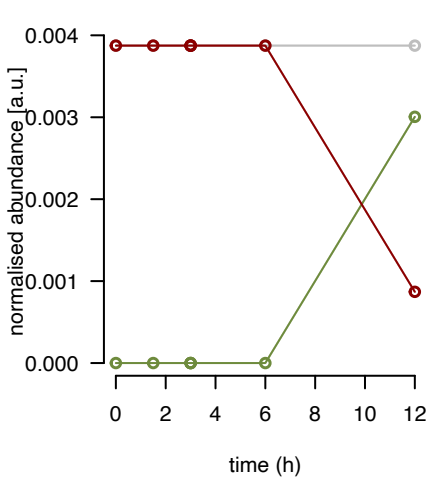**bL17m fraction 6**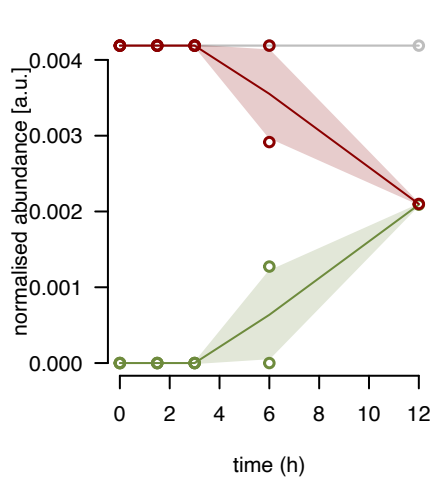**bL17m fraction 7**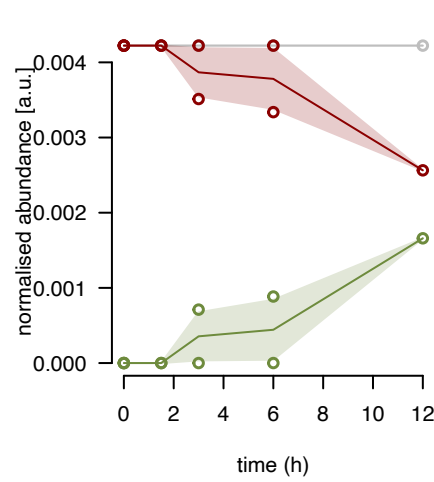**bL17m fraction 8**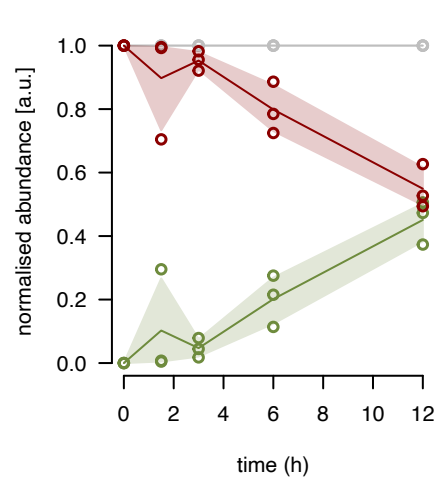**bL17m fraction 9**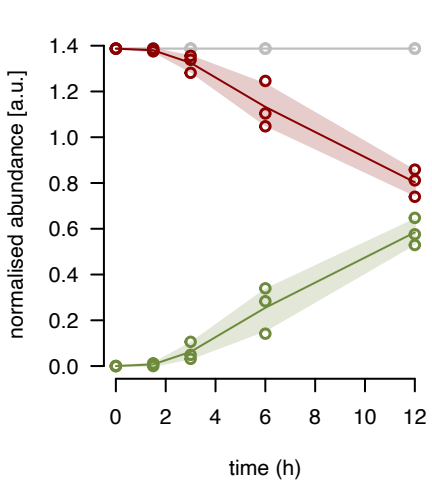**bL17m fraction 10**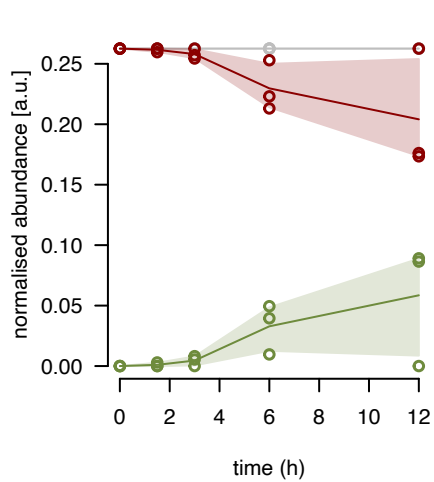**bL17m fraction 11**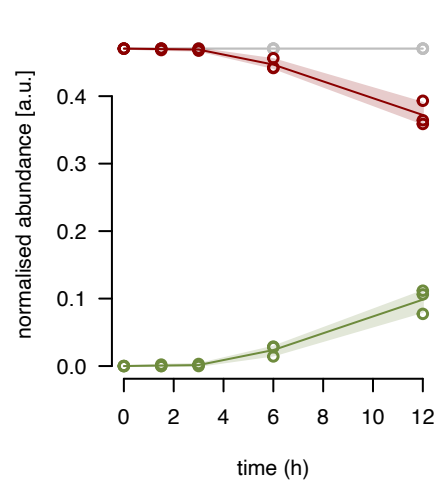**bL17m fraction 12**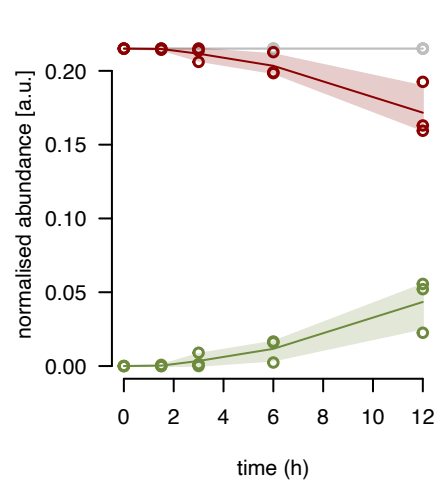**bL17m fraction 13**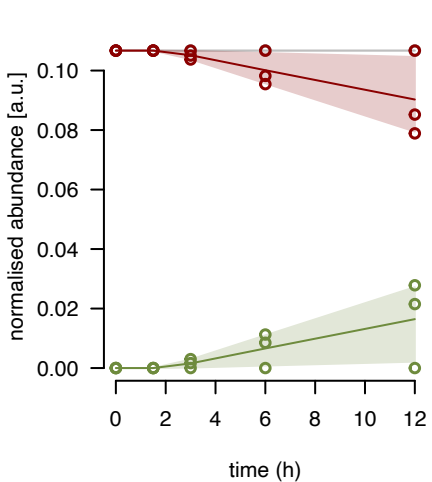**bL17m fraction 14**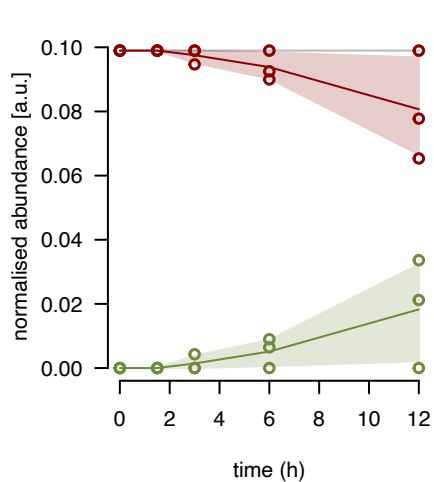**bL17m fraction 15**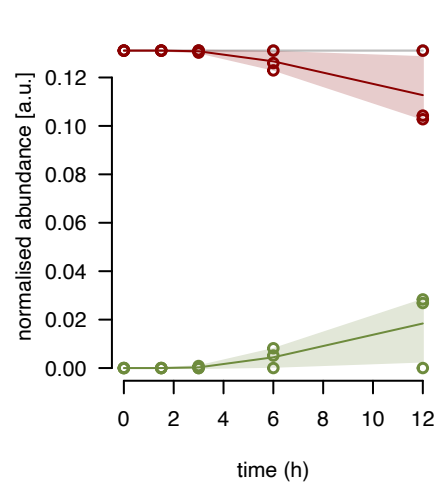**bL17m fraction 16**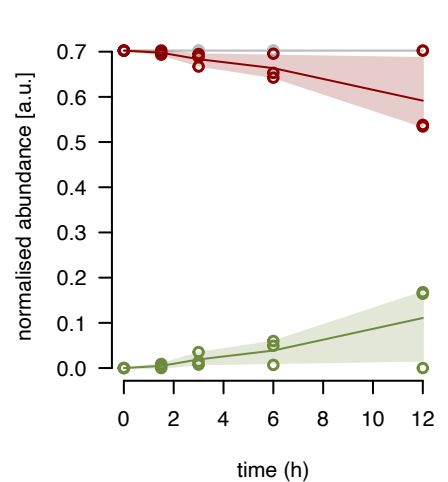

**uL18m fraction 1**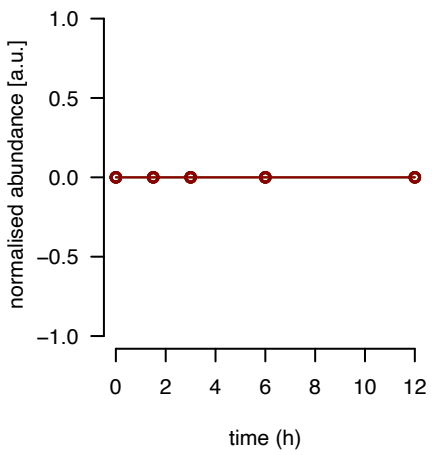**uL18m fraction 2**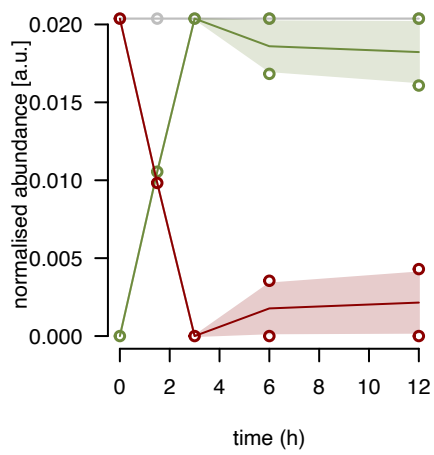**uL18m fraction 3**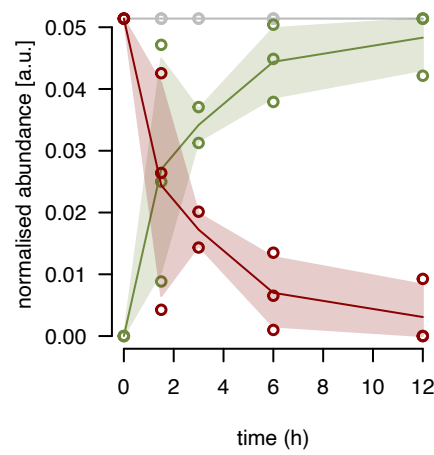**uL18m fraction 4**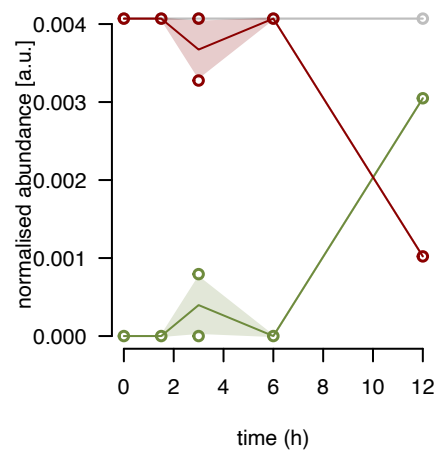**uL18m fraction 5**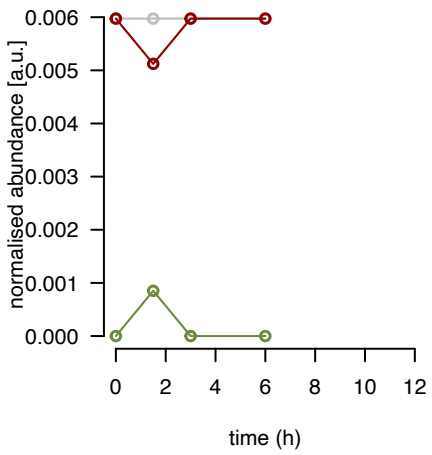**uL18m fraction 6**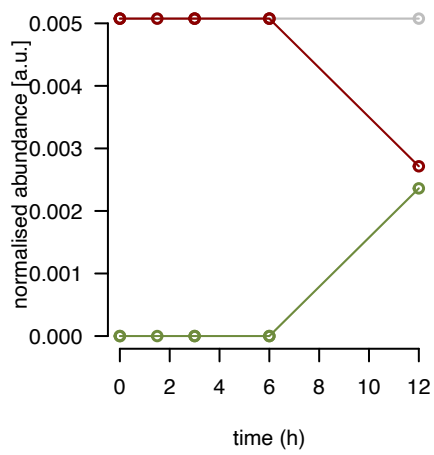**uL18m fraction 7**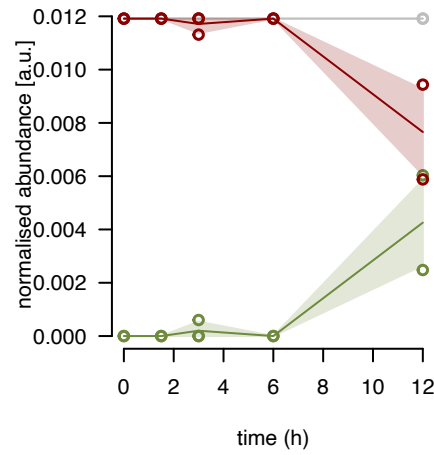**uL18m fraction 8**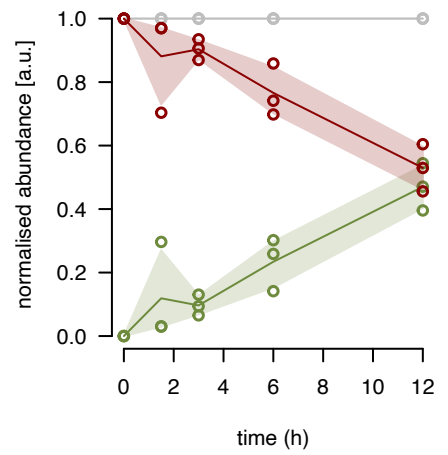**uL18m fraction 9**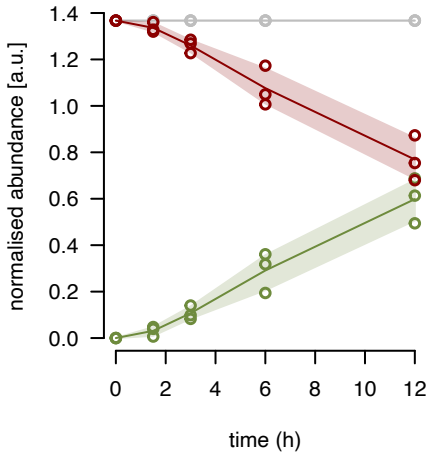**uL18m fraction 10**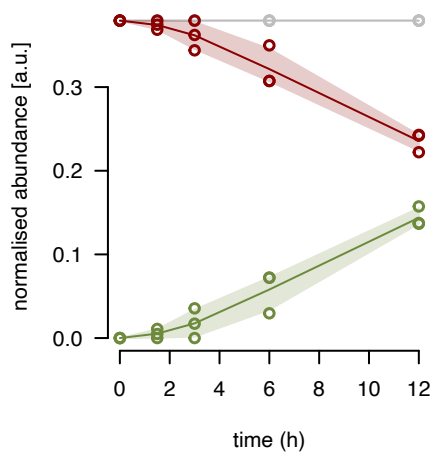**uL18m fraction 11**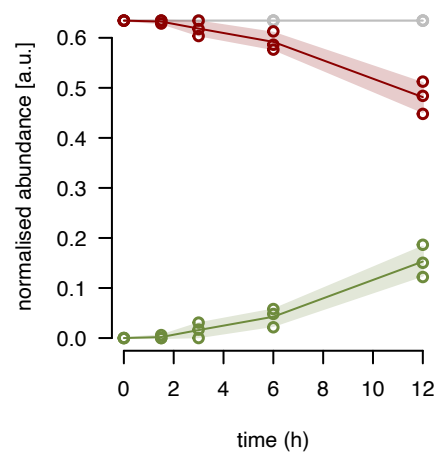**uL18m fraction 12**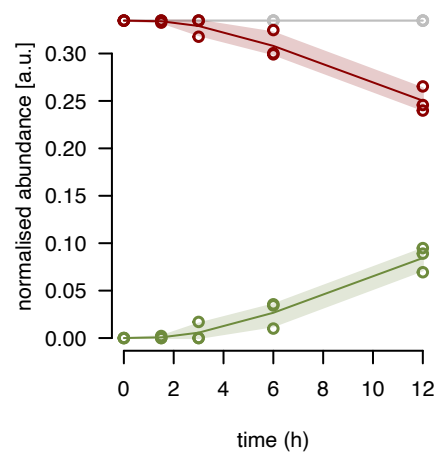**uL18m fraction 13**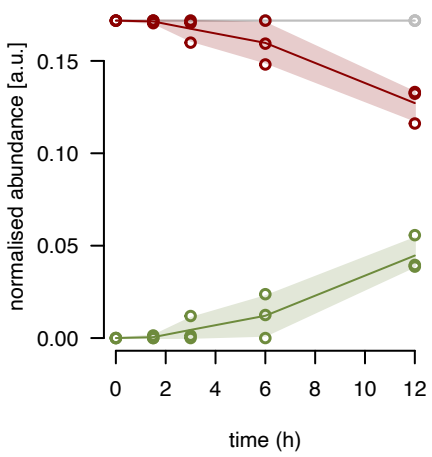**uL18m fraction 14**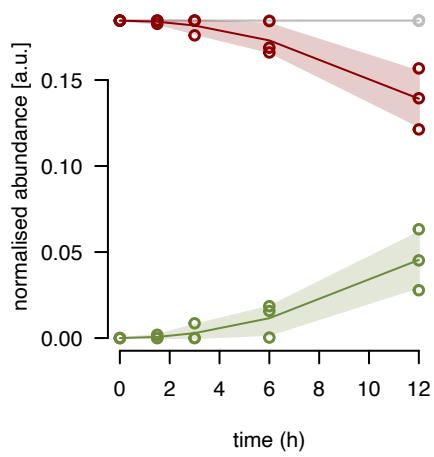**uL18m fraction 15**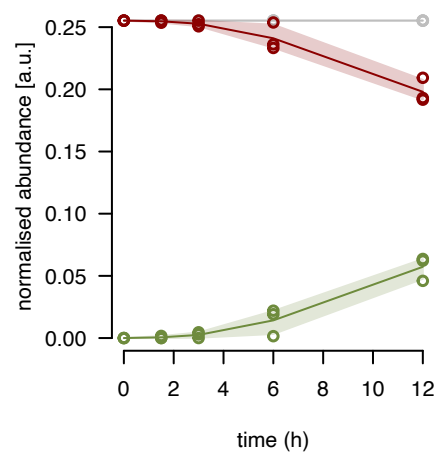**uL18m fraction 16**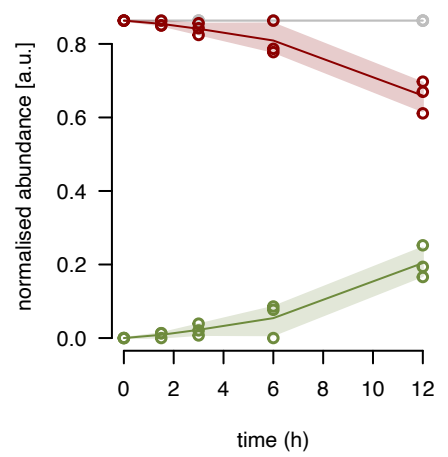

**bL19m fraction 1**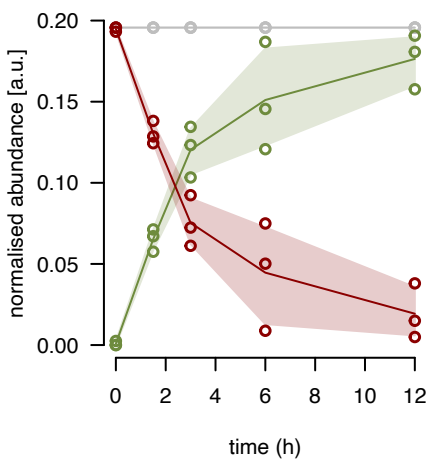**bL19m fraction 2**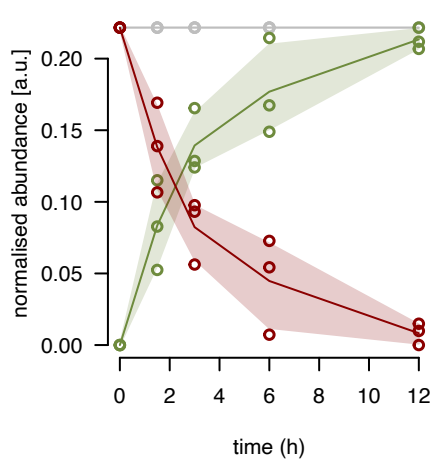**bL19m fraction 3**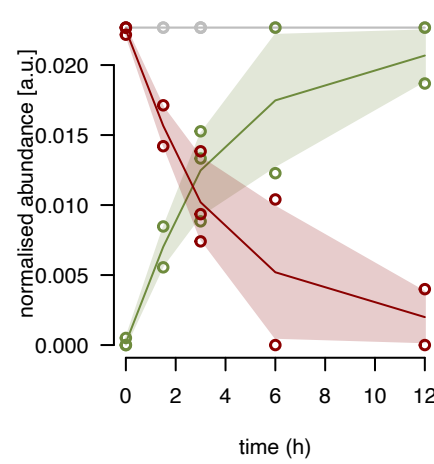**bL19m fraction 4**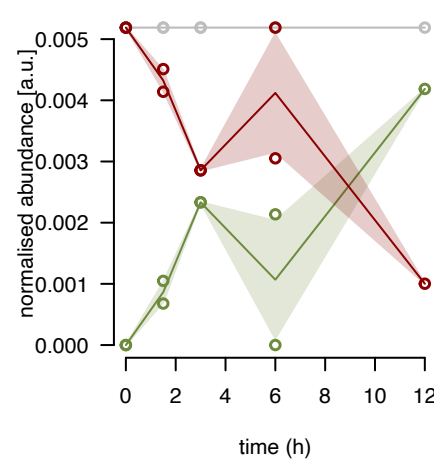**bL19m fraction 5**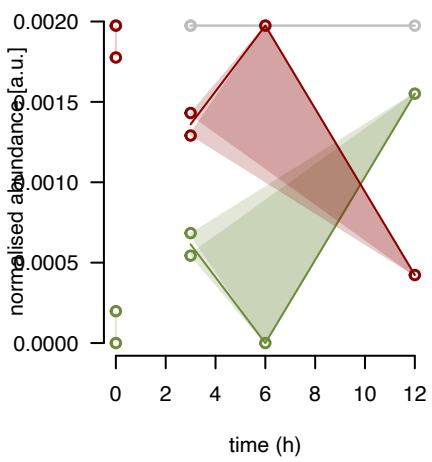**bL19m fraction 6**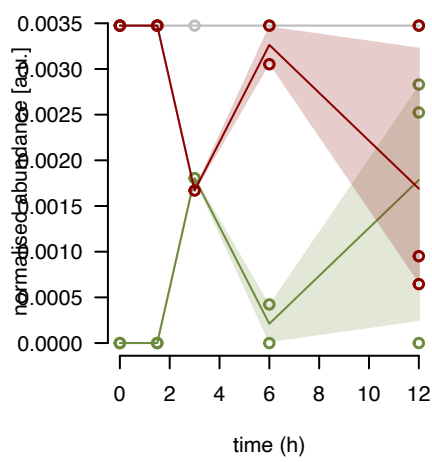**bL19m fraction 7**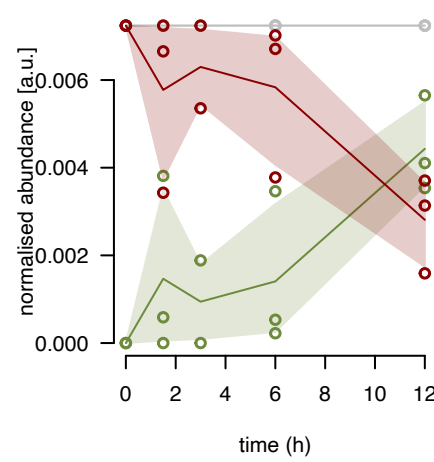**bL19m fraction 8**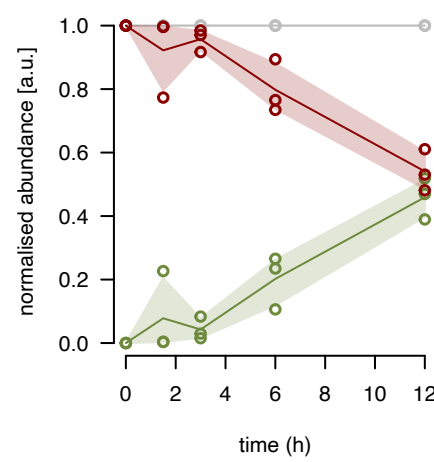**bL19m fraction 9**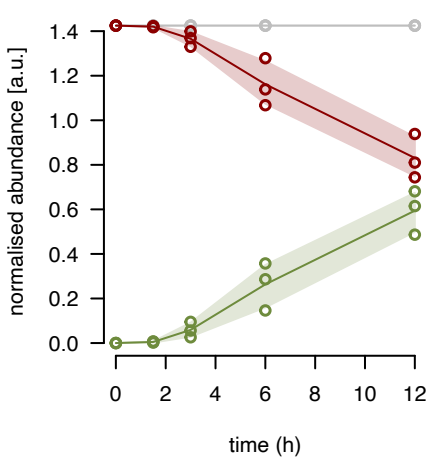**bL19m fraction 10**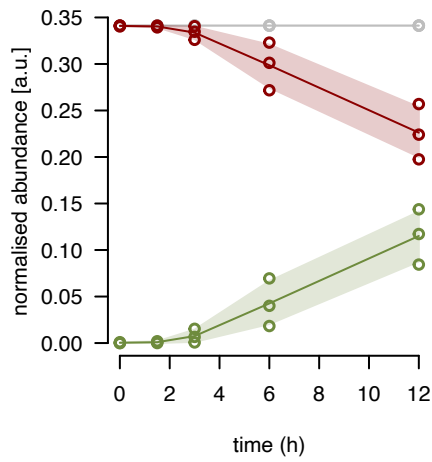**bL19m fraction 11**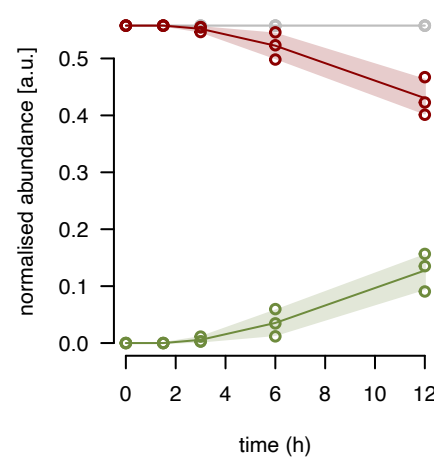**bL19m fraction 12**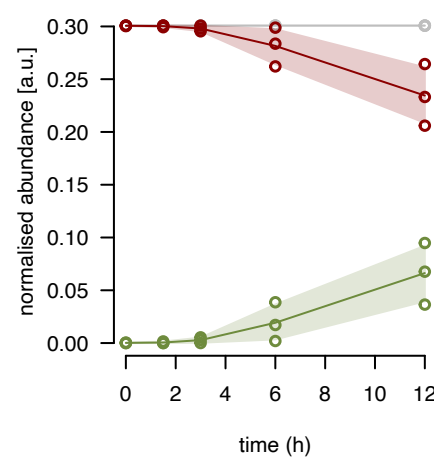**bL19m fraction 13**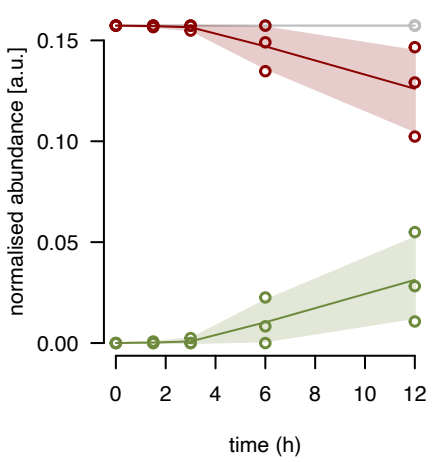**bL19m fraction 14**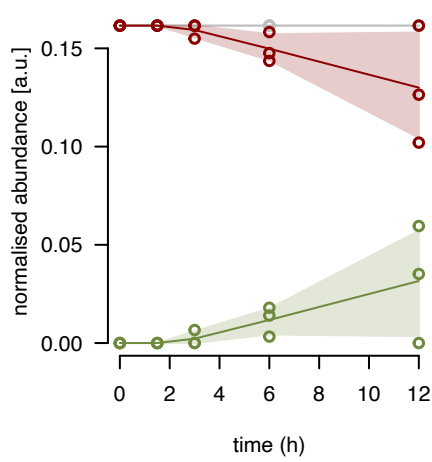**bL19m fraction 15**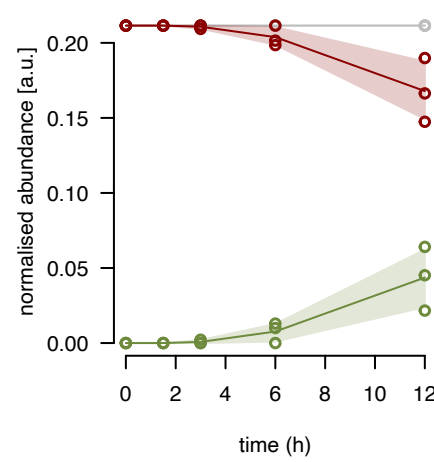**bL19m fraction 16**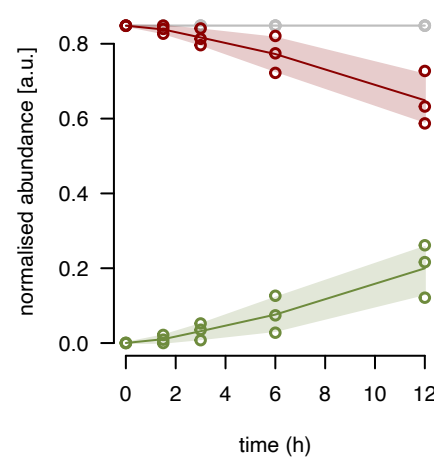

**bL20m fraction 1**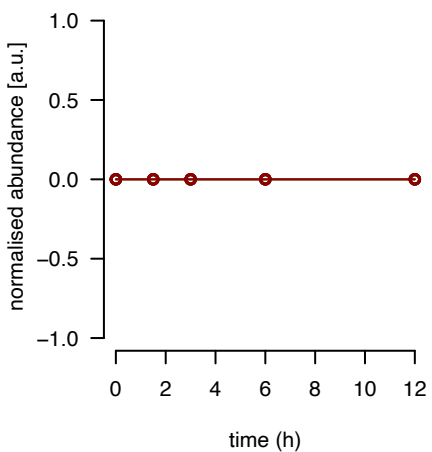**bL20m fraction 2**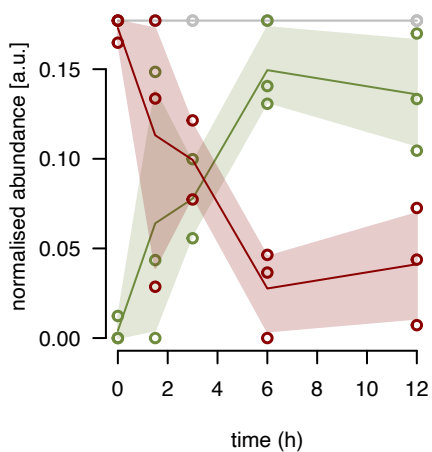**bL20m fraction 3**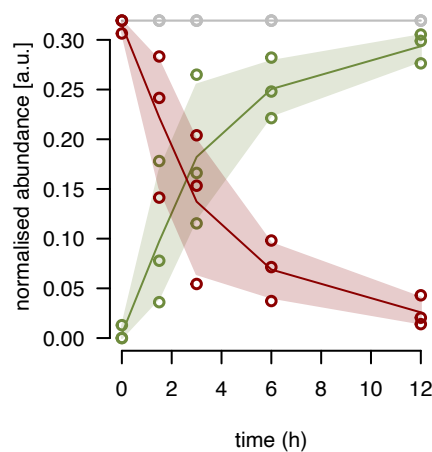**bL20m fraction 4**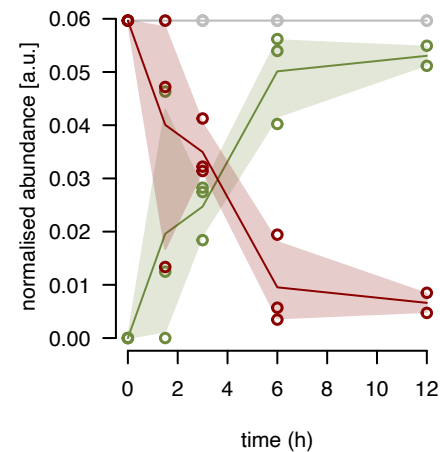**bL20m fraction 5**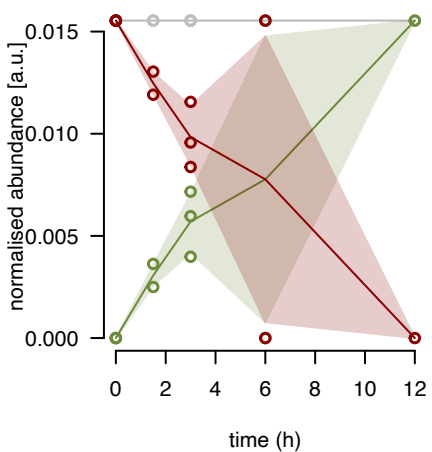**bL20m fraction 6**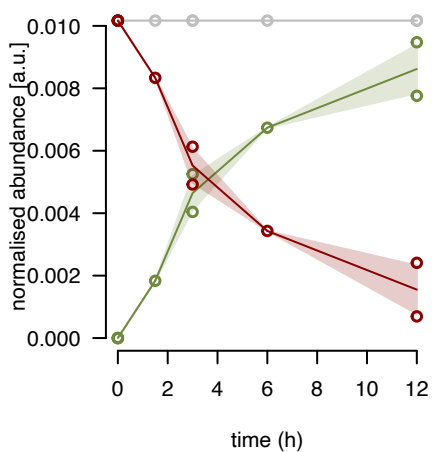**bL20m fraction 7**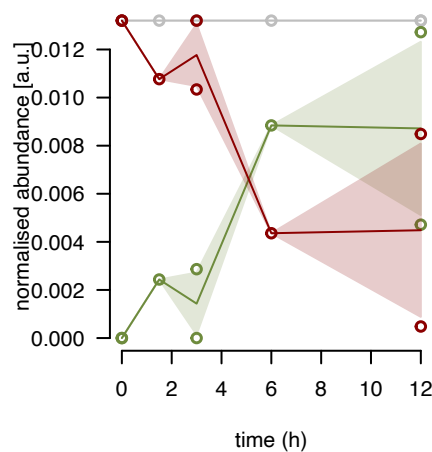**bL20m fraction 8**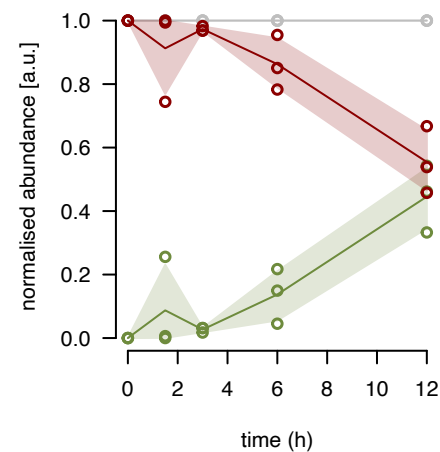**bL20m fraction 9**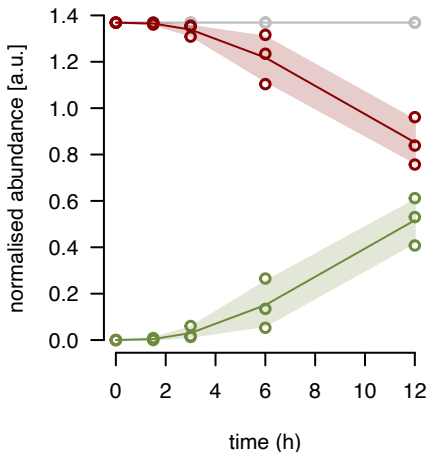**bL20m fraction 10**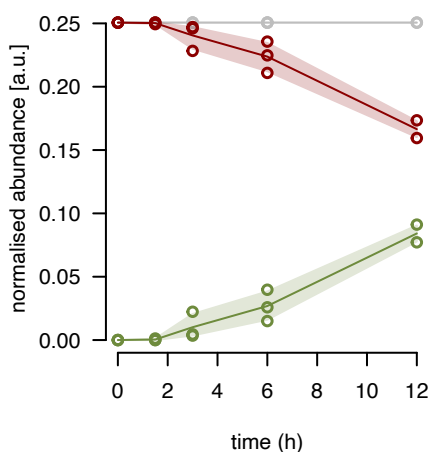**bL20m fraction 11**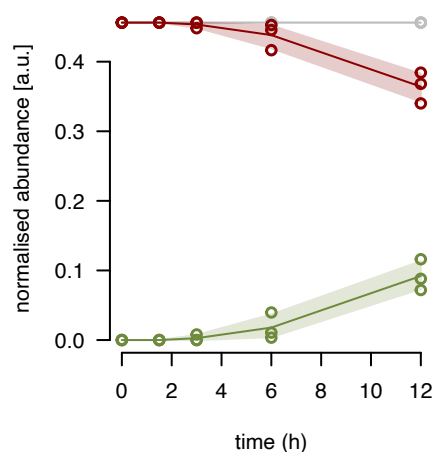**bL20m fraction 12**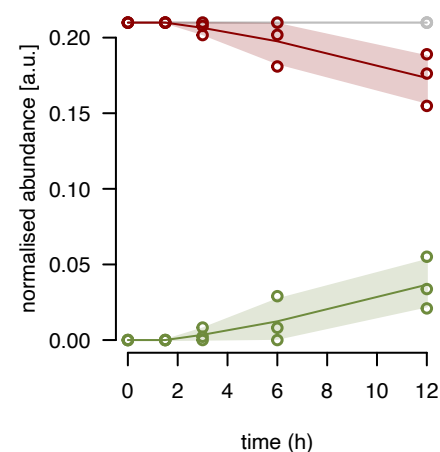**bL20m fraction 13**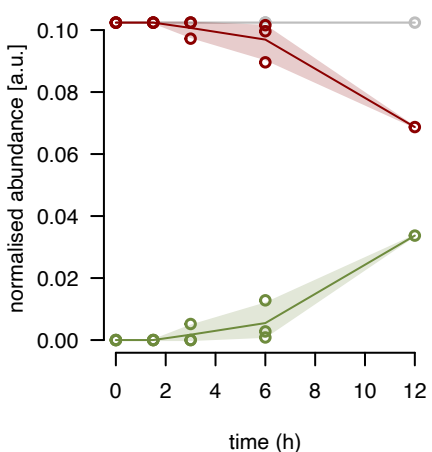**bL20m fraction 14**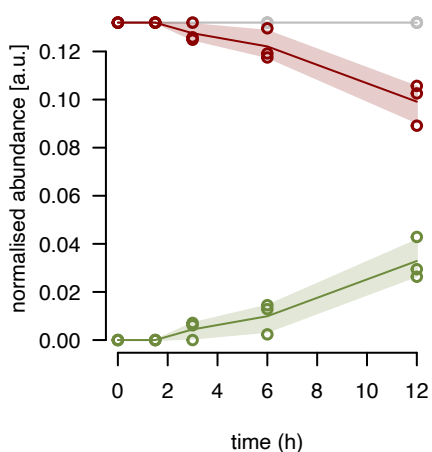**bL20m fraction 15**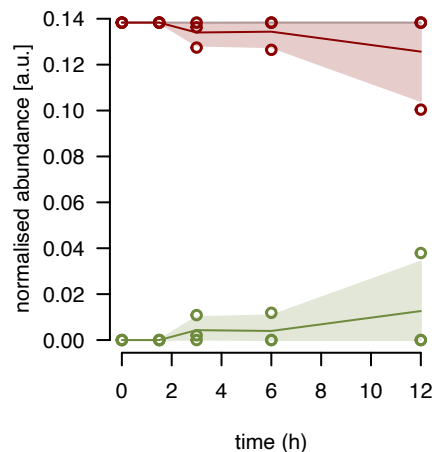**bL20m fraction 16**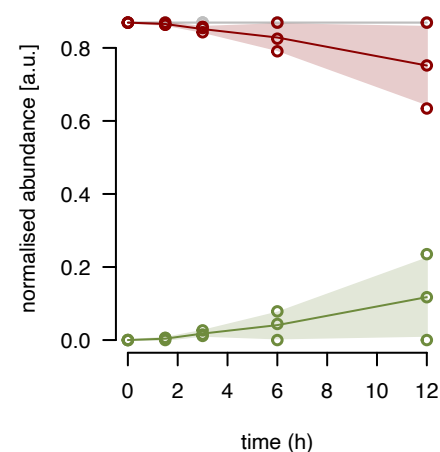



**bL21m fraction 1**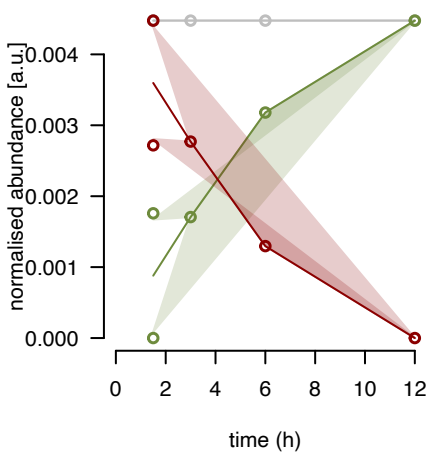**bL21m fraction 2**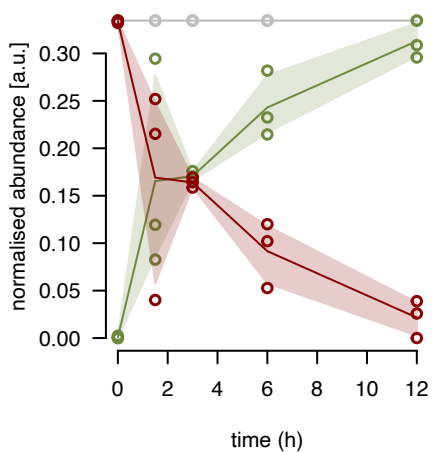**bL21m fraction 3**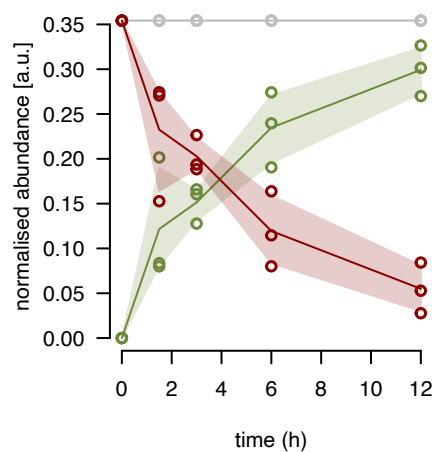**bL21m fraction 4**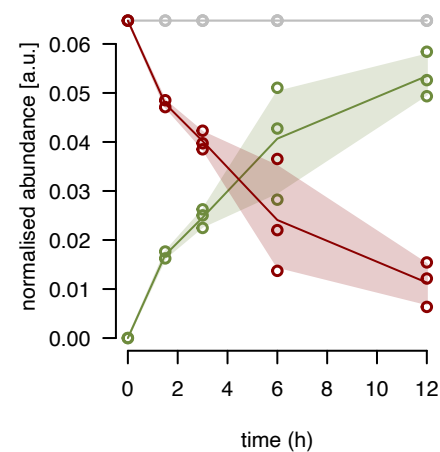**bL21m fraction 5**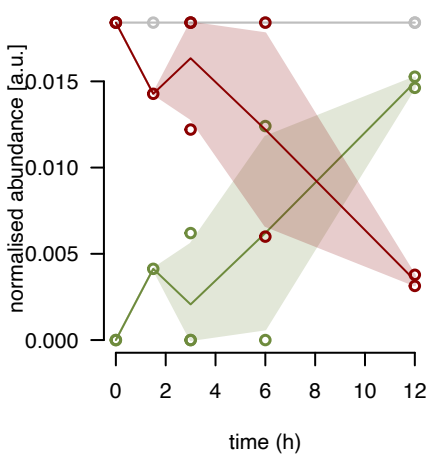**bL21m fraction 6**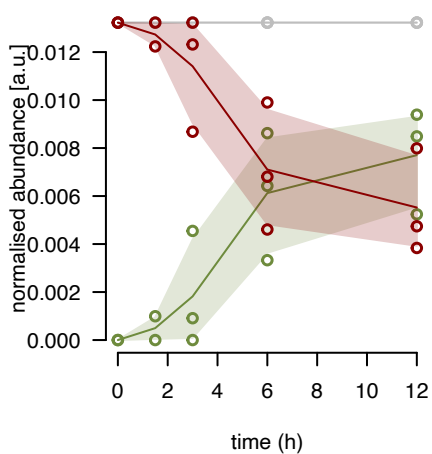**bL21m fraction 7**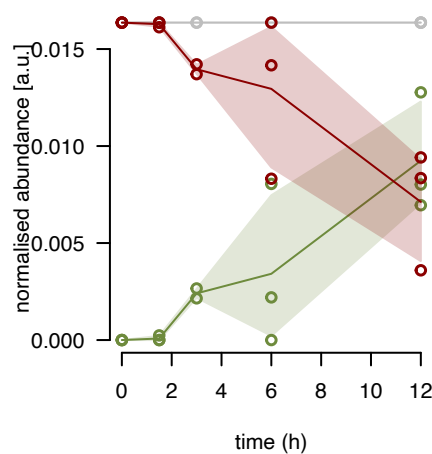**bL21m fraction 8**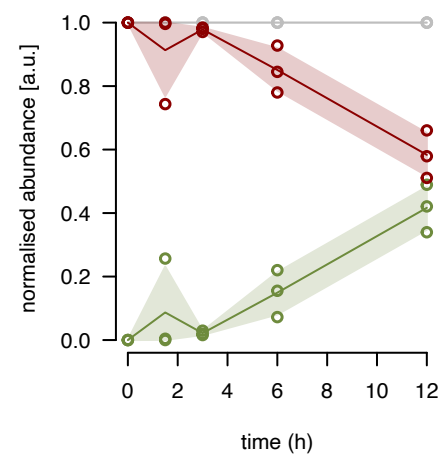**bL21m fraction 9**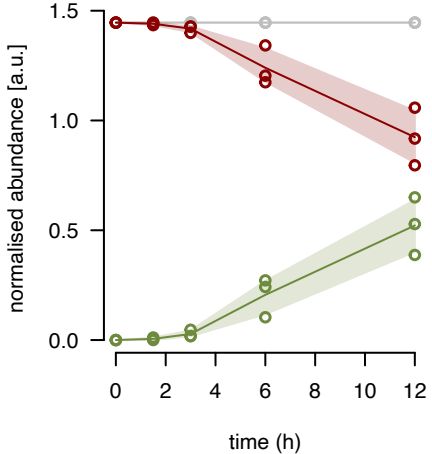**bL21m fraction 10**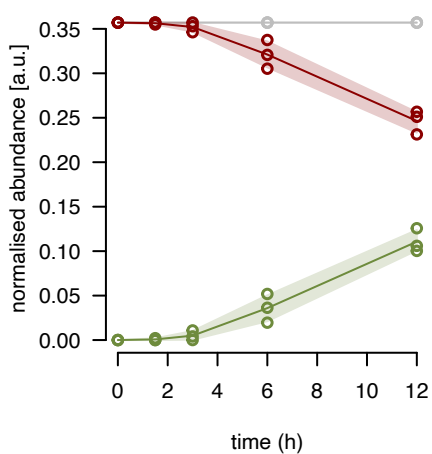**bL21m fraction 11**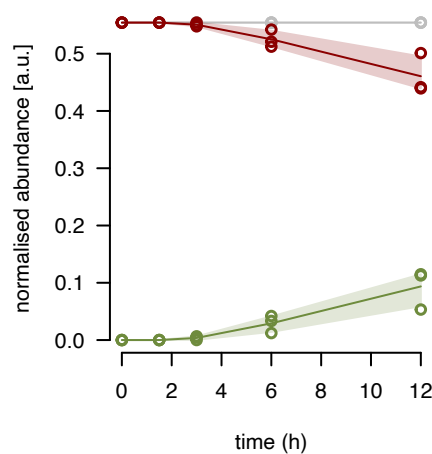**bL21m fraction 12**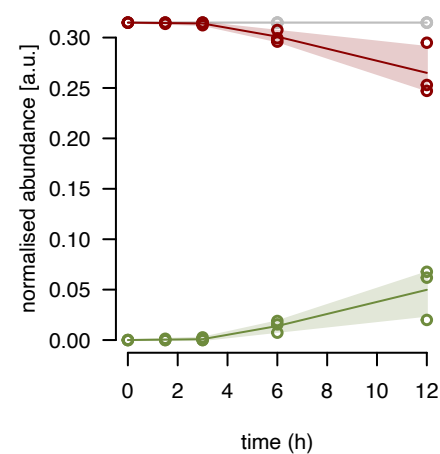**bL21m fraction 13**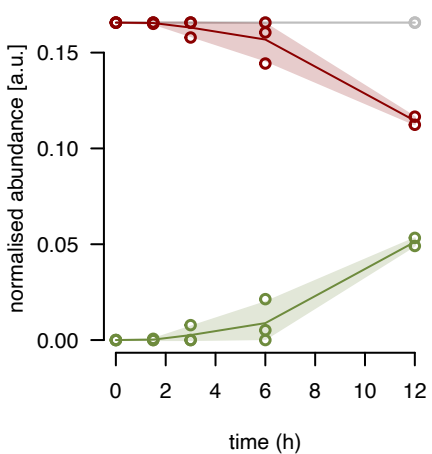**bL21m fraction 14**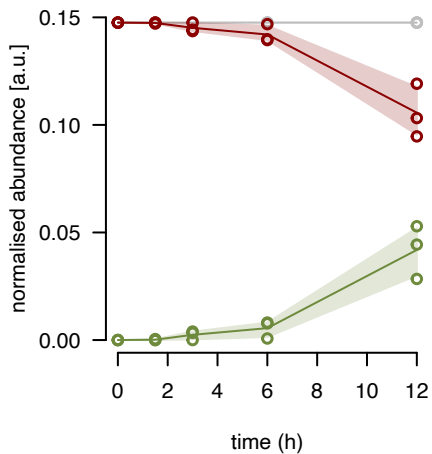**bL21m fraction 15**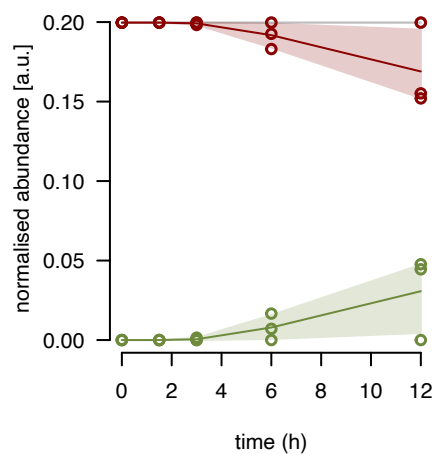**bL21m fraction 16**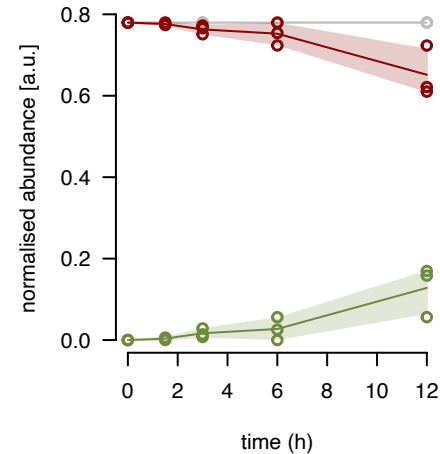

**uL22m fraction 1**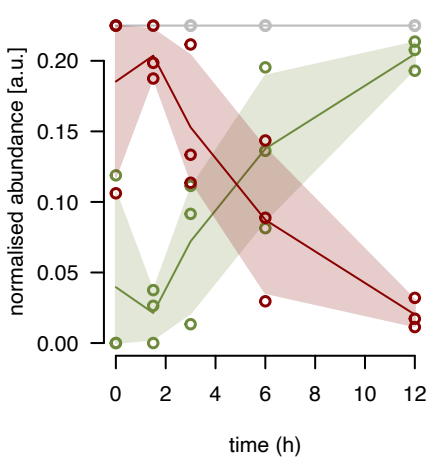**uL22m fraction 2**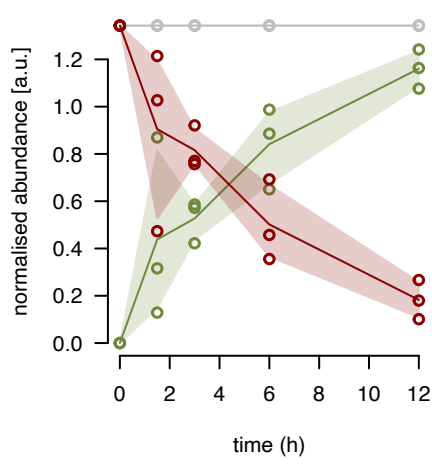**uL22m fraction 3**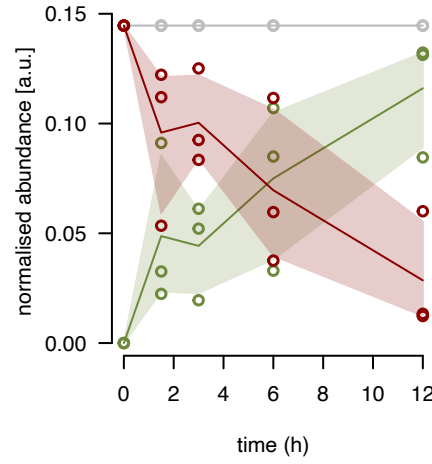**uL22m fraction 4**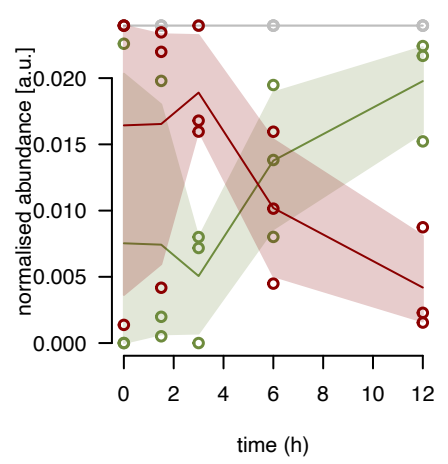**uL22m fraction 5**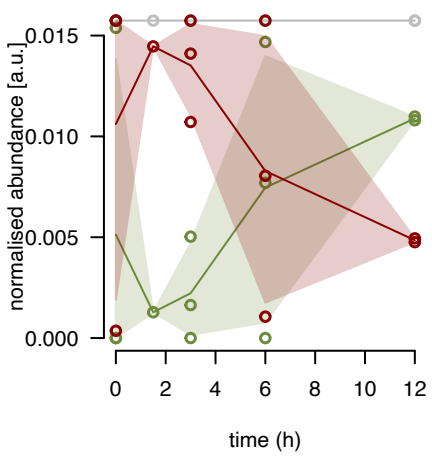**uL22m fraction 6**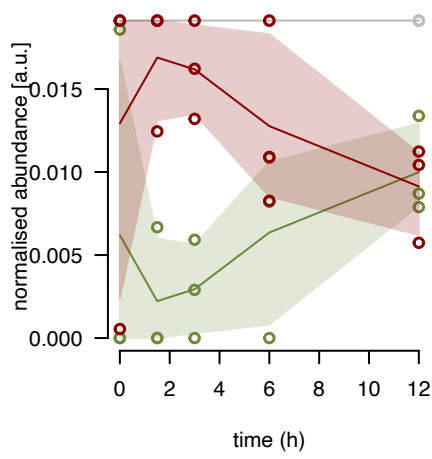**uL22m fraction 7**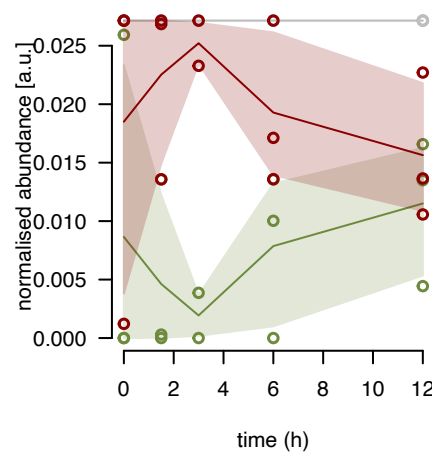**uL22m fraction 8**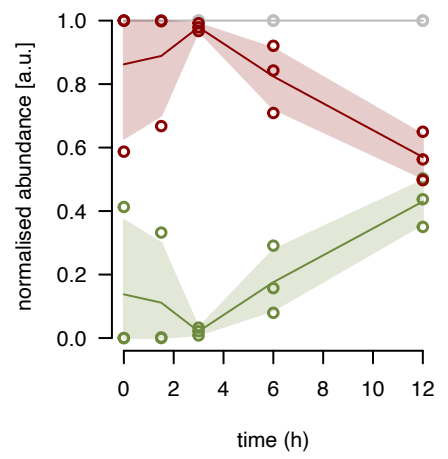**uL22m fraction 9**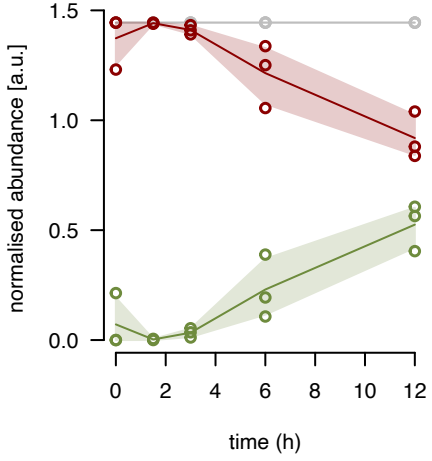**uL22m fraction 10**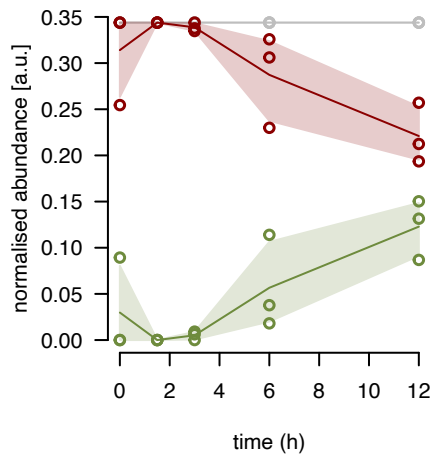**uL22m fraction 11**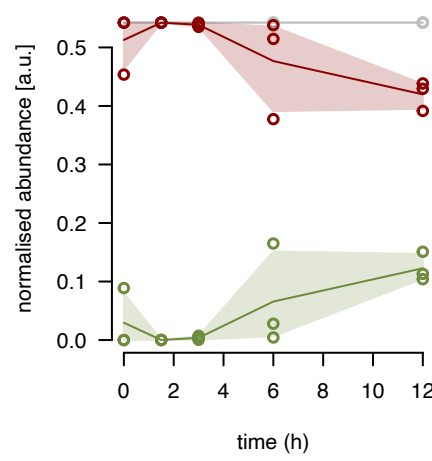**uL22m fraction 12**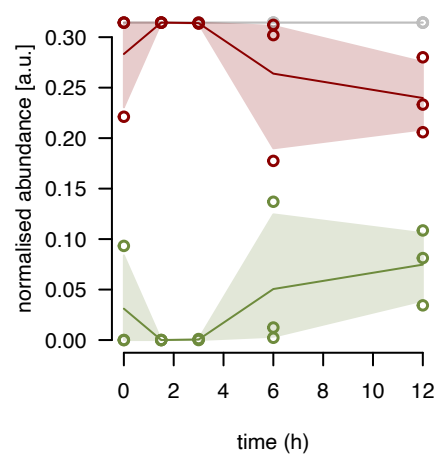**uL22m fraction 13**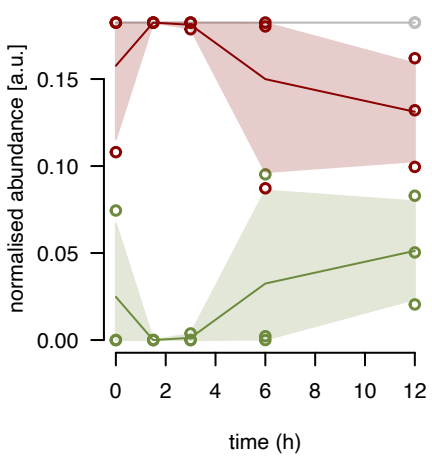**uL22m fraction 14**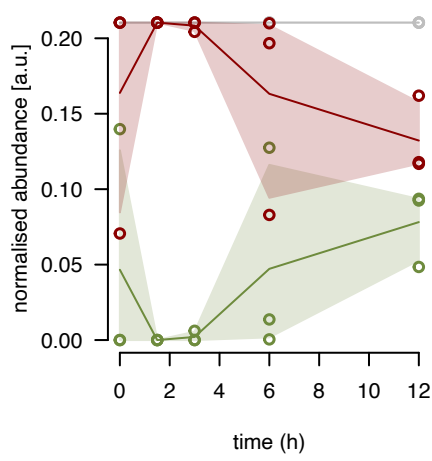**uL22m fraction 15**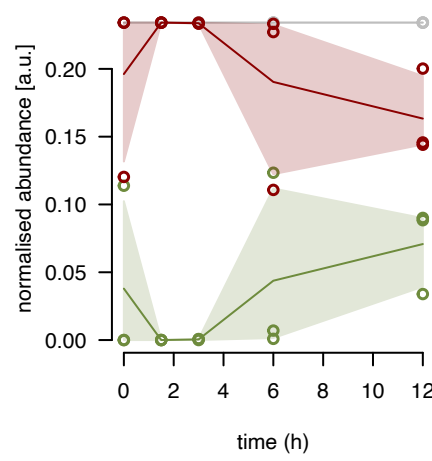**uL22m fraction 16**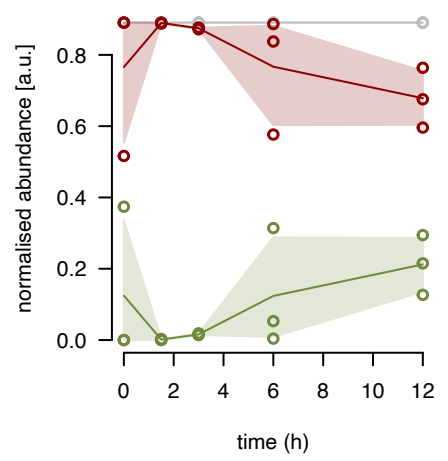

**uL23m fraction 1**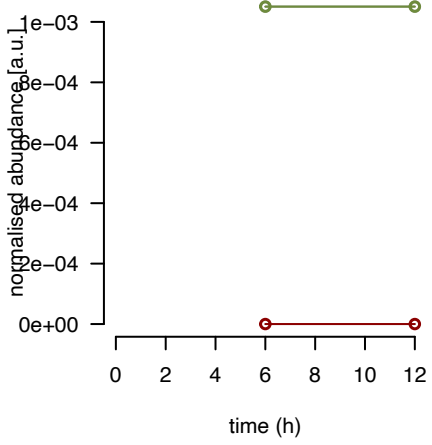**uL23m fraction 2**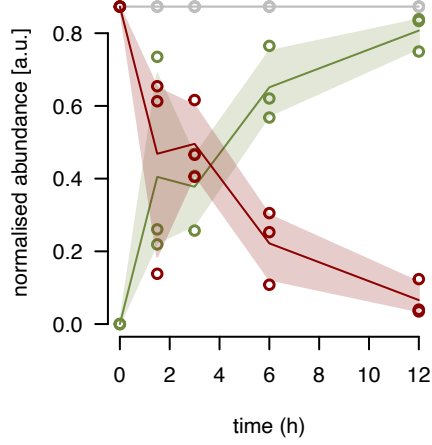**uL23m fraction 3**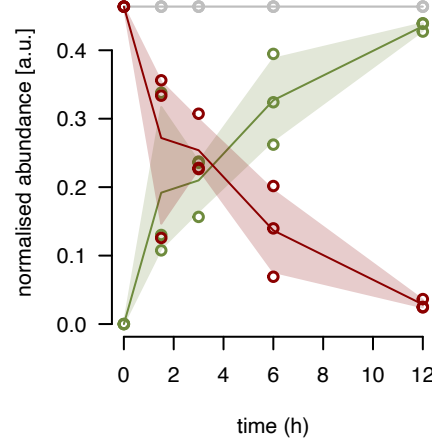**uL23m fraction 4**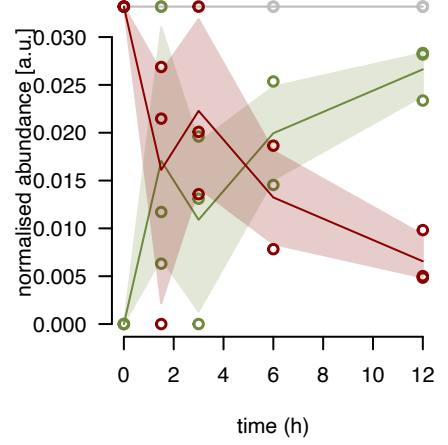**uL23m fraction 5**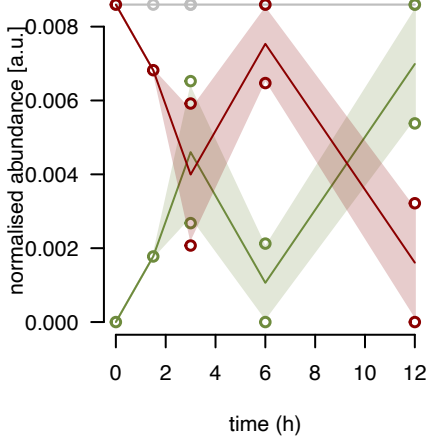**uL23m fraction 6**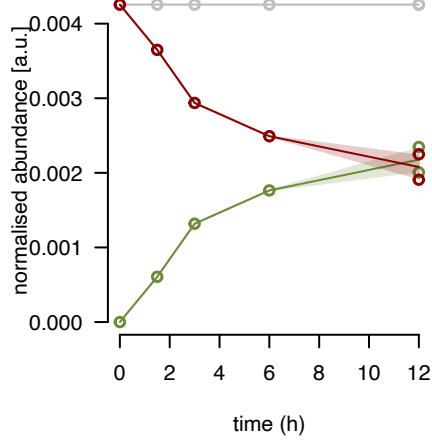**uL23m fraction 7**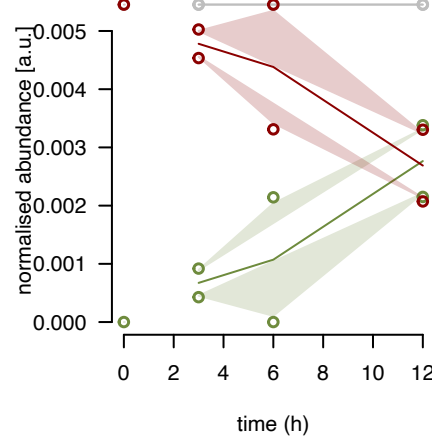**uL23m fraction 8**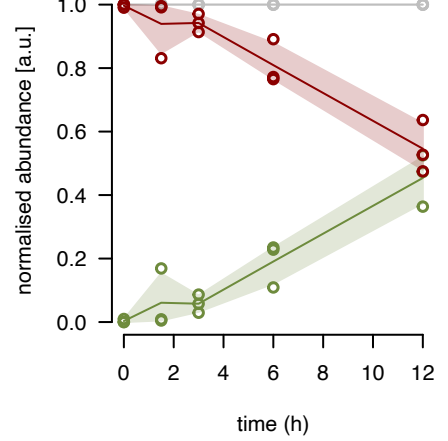**uL23m fraction 9**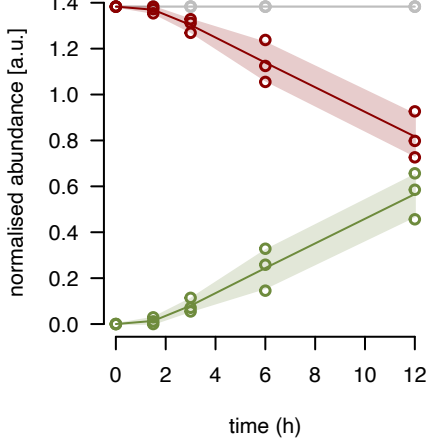**uL23m fraction 10**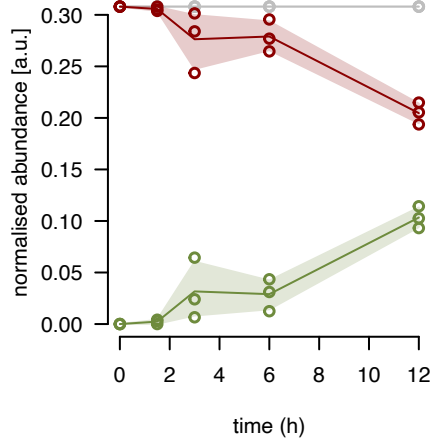**uL23m fraction 11**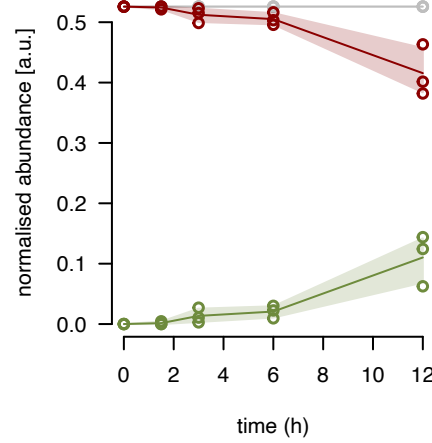**uL23m fraction 12**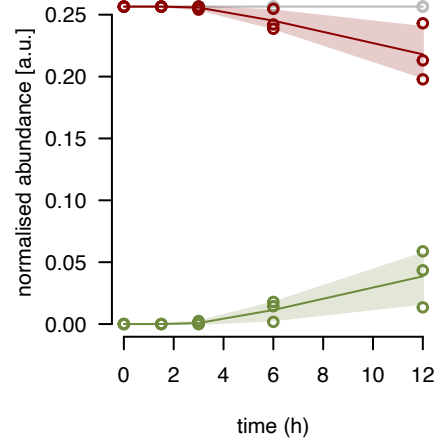**uL23m fraction 13**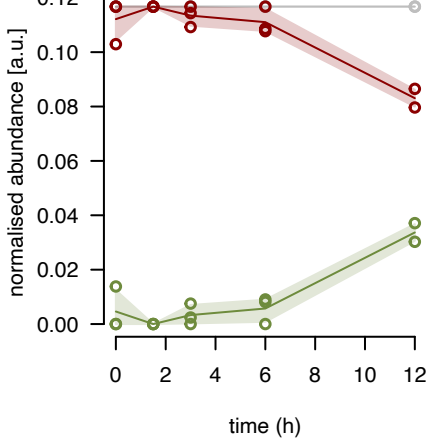**uL23m fraction 14**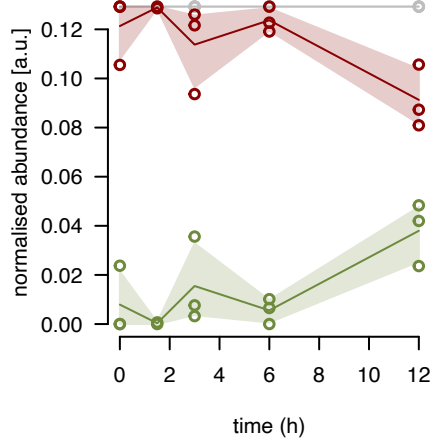**uL23m fraction 15**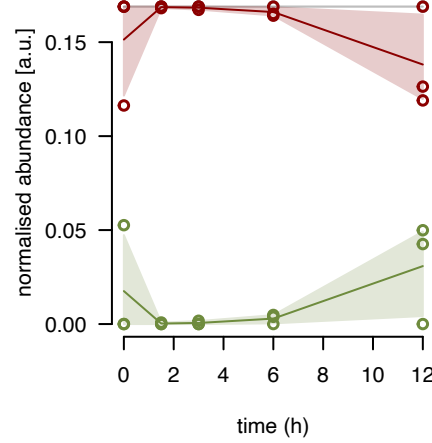**uL23m fraction 16**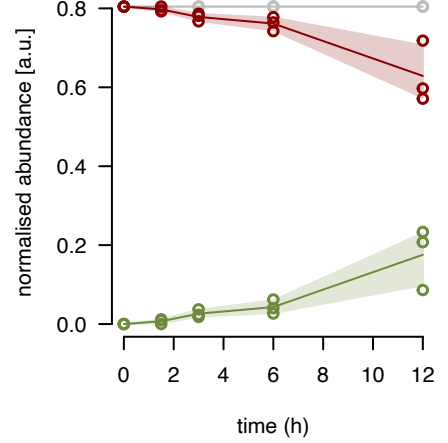

**uL24m fraction 1**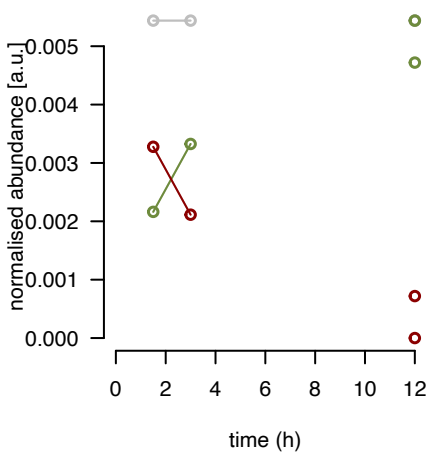**uL24m fraction 2**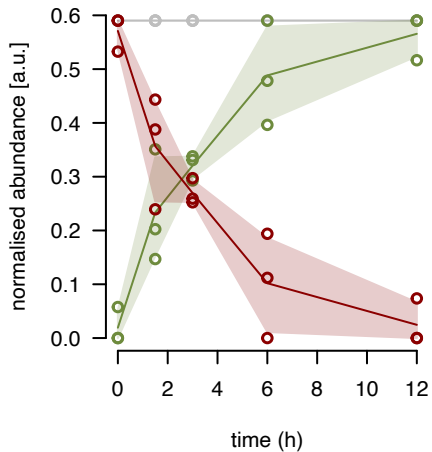**uL24m fraction 3**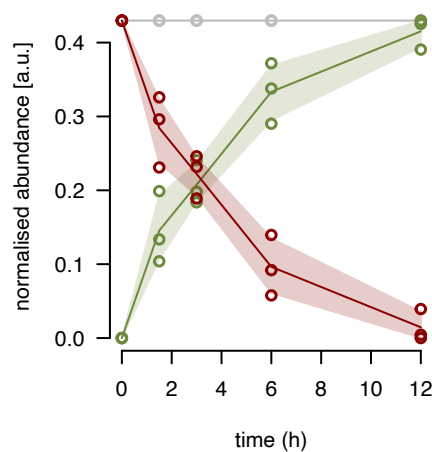**uL24m fraction 4**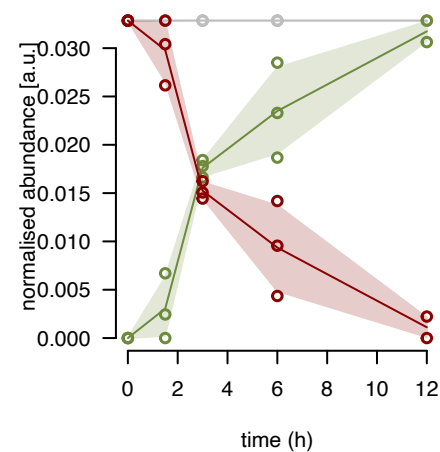**uL24m fraction 5**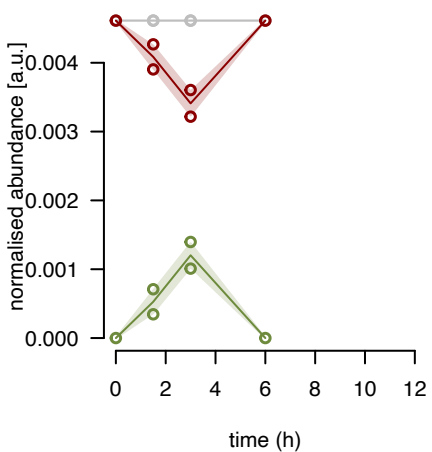**uL24m fraction 6**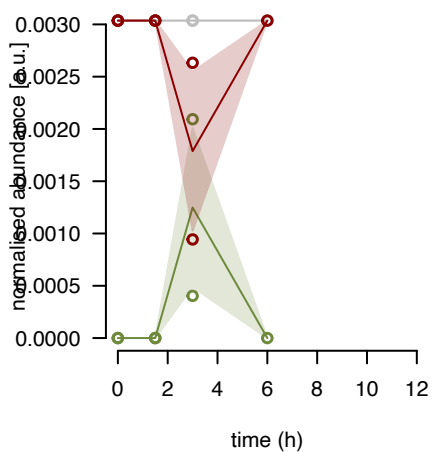**uL24m fraction 7**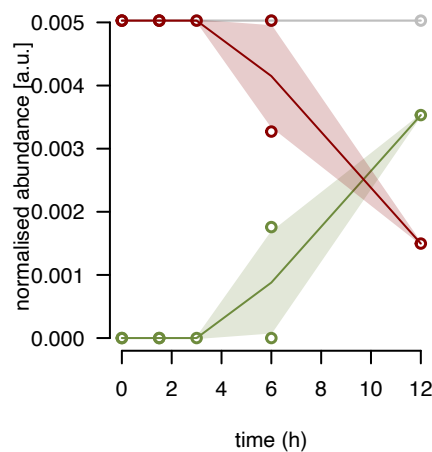**uL24m fraction 8**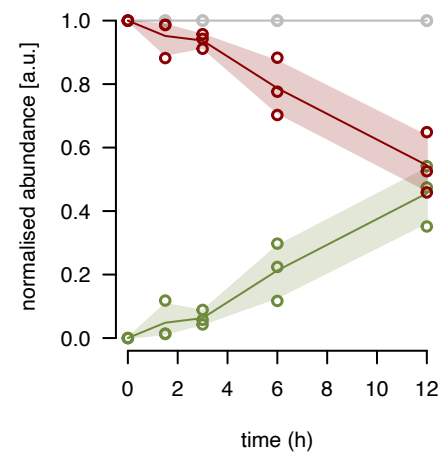**uL24m fraction 9**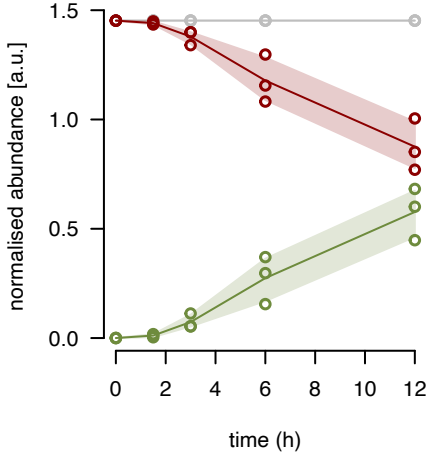**uL24m fraction 10**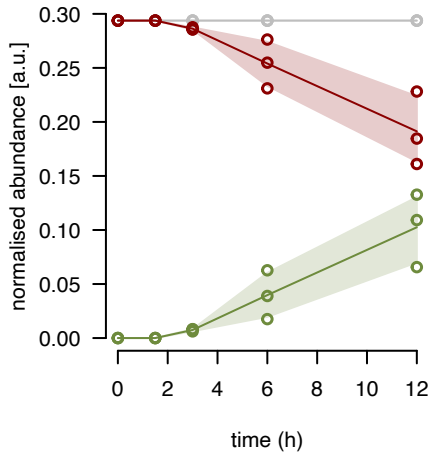**uL24m fraction 11**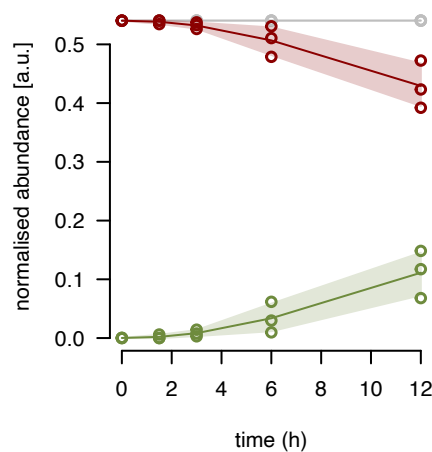**uL24m fraction 12**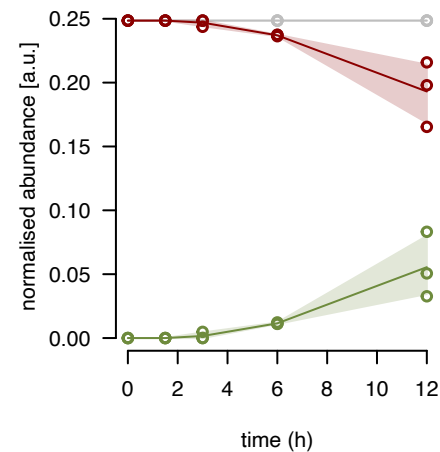**uL24m fraction 13**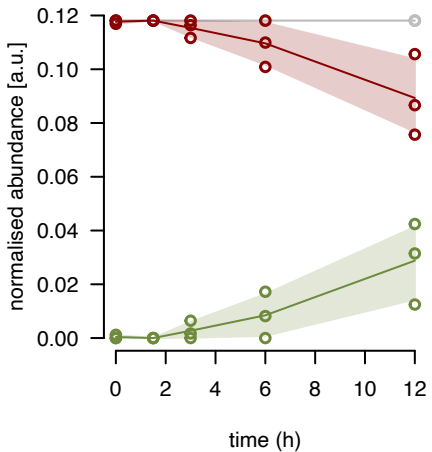**uL24m fraction 14**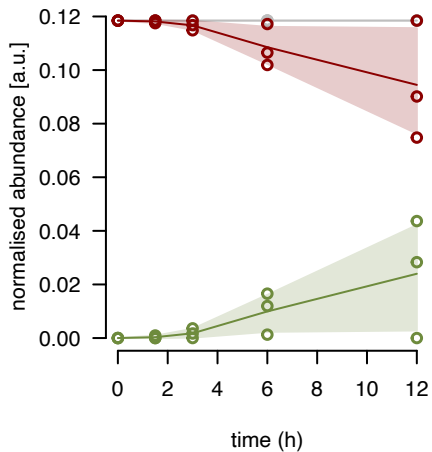**uL24m fraction 15**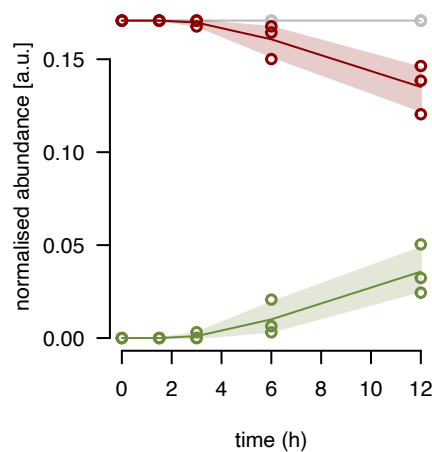**uL24m fraction 16**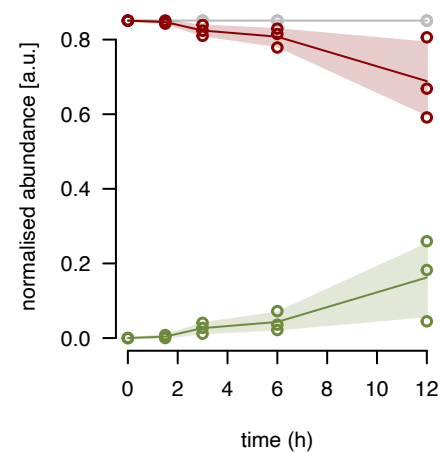

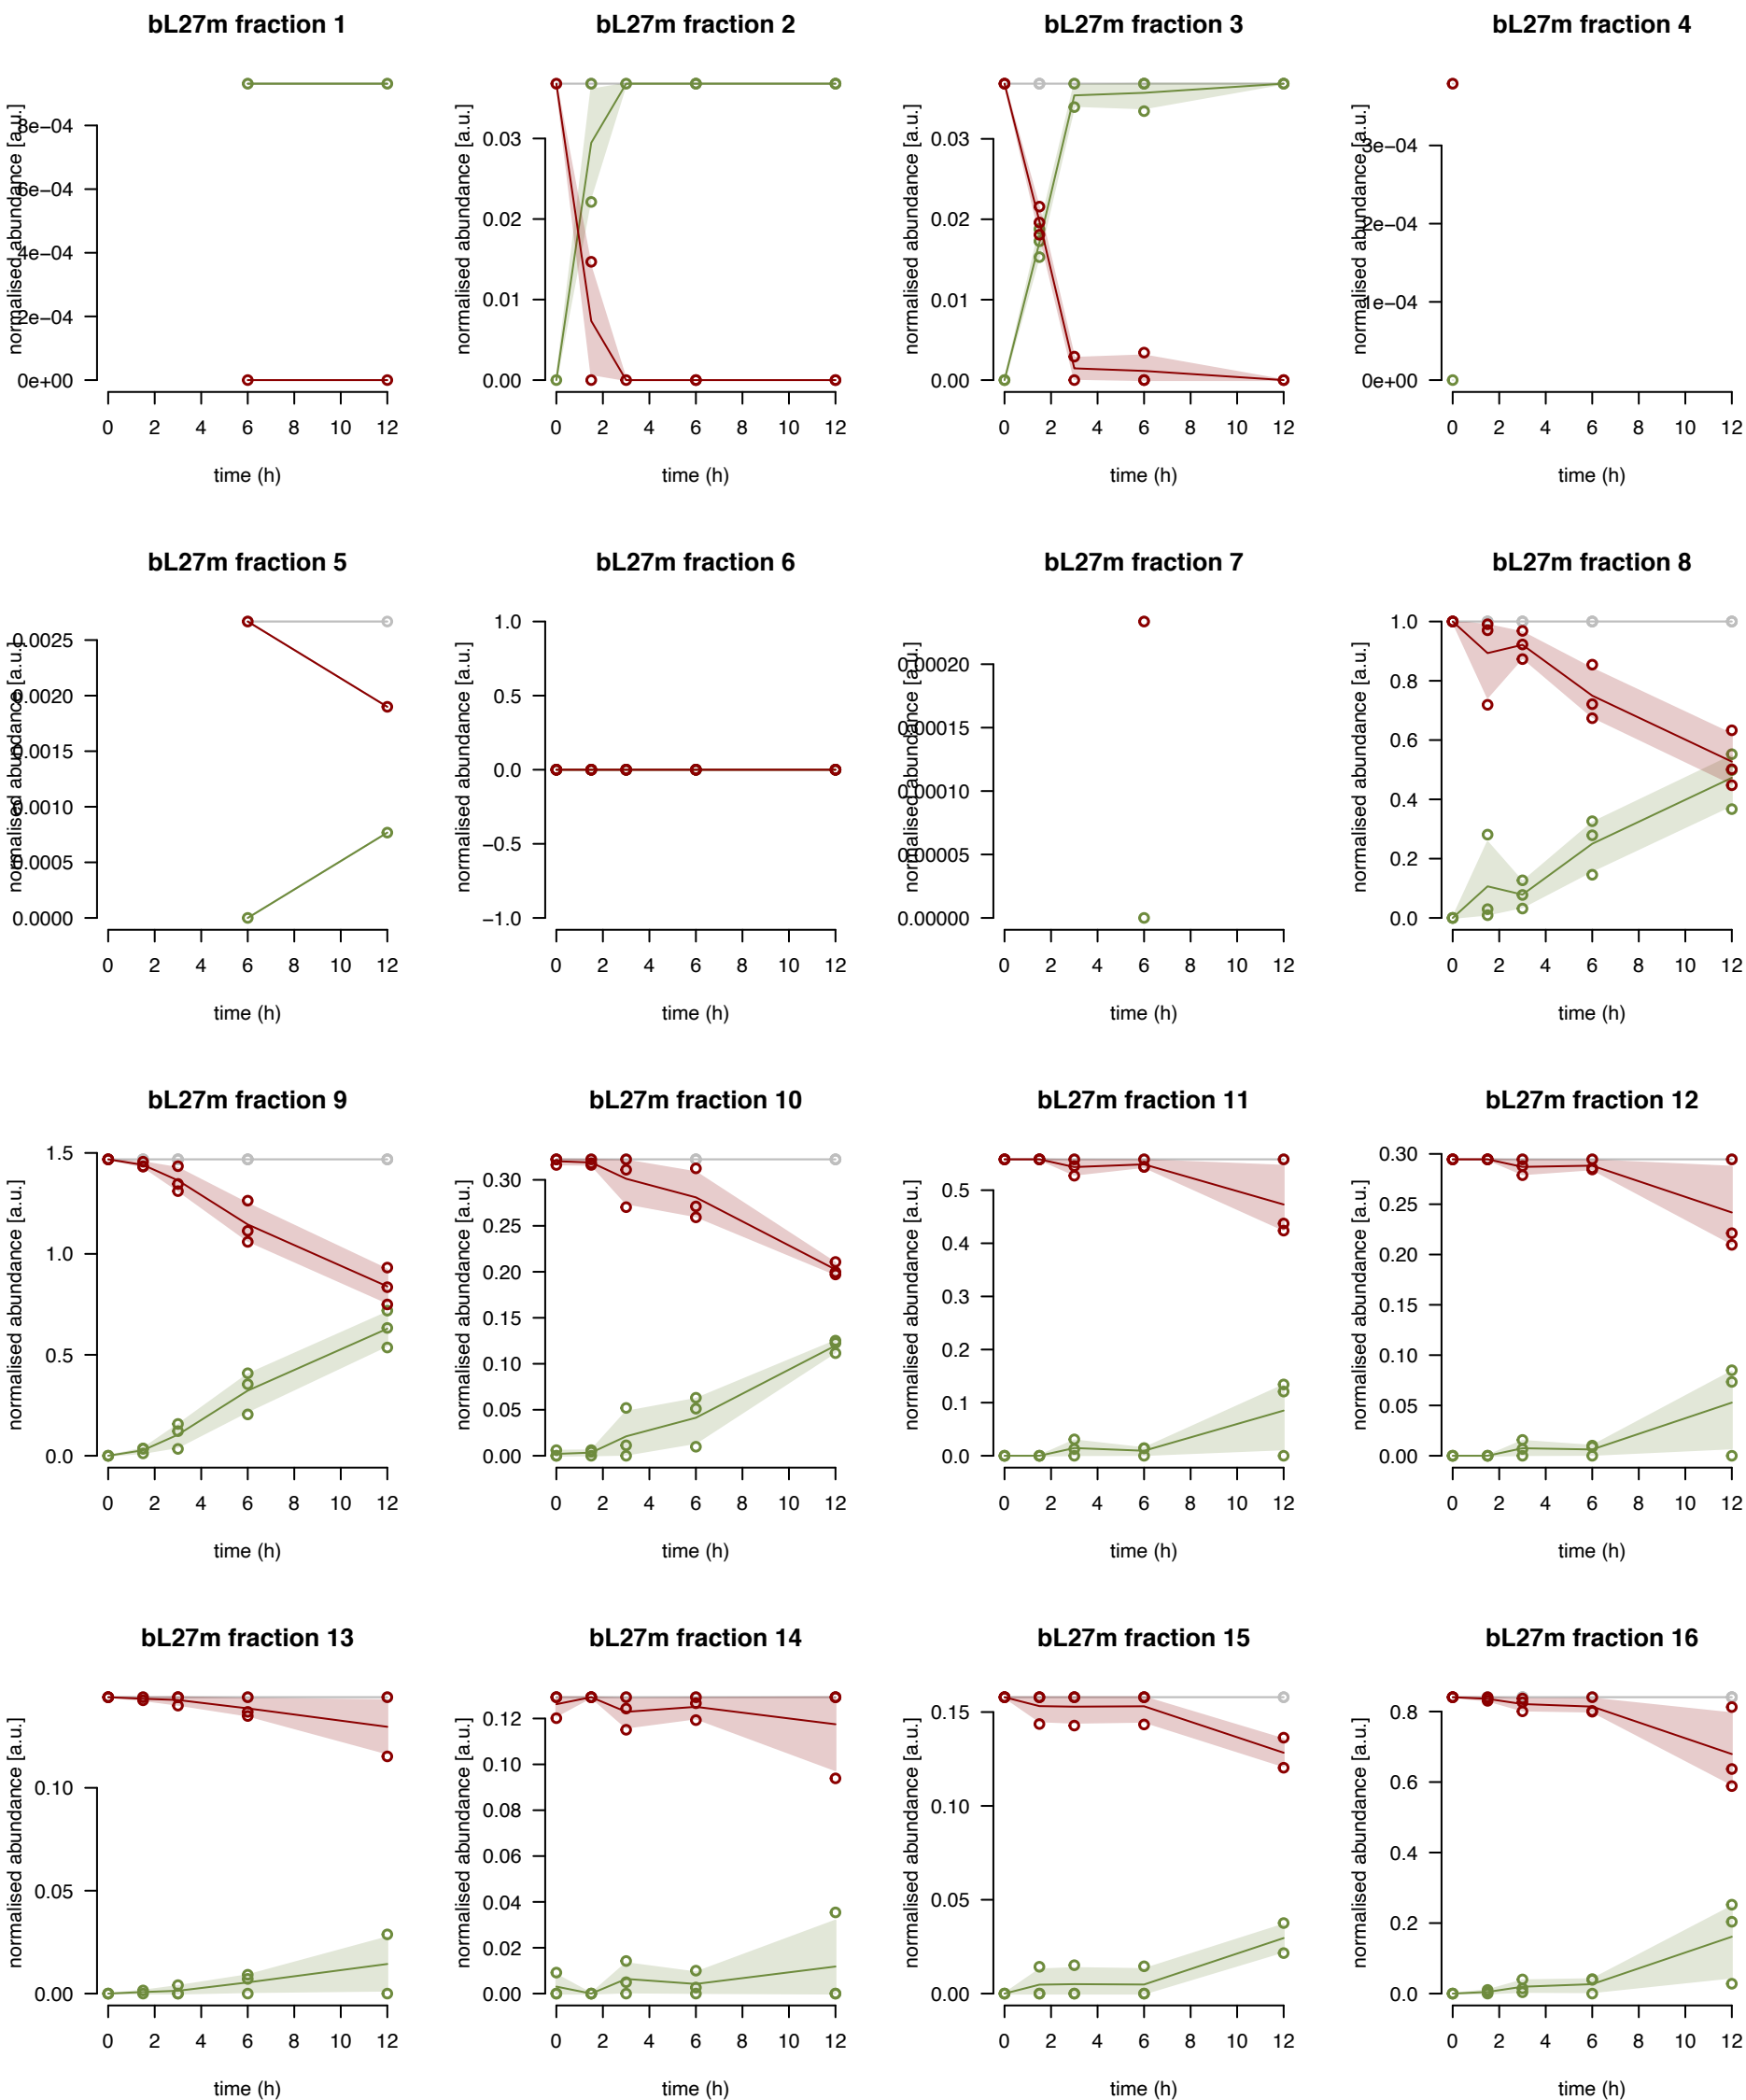

**bL28m fraction 1**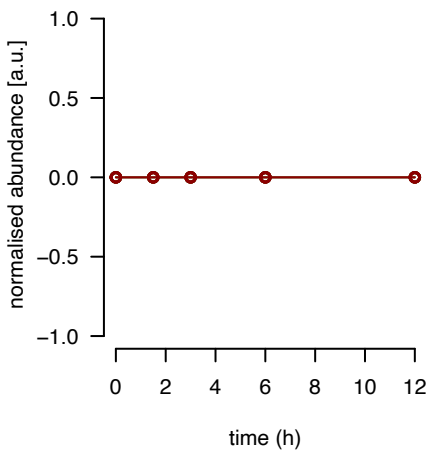**bL28m fraction 2**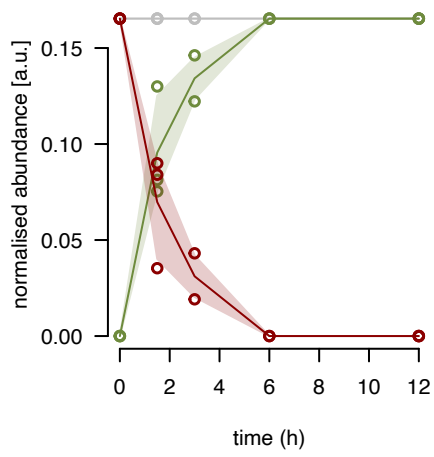**bL28m fraction 3**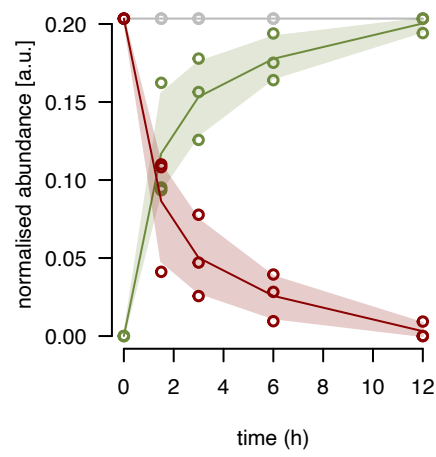**bL28m fraction 4**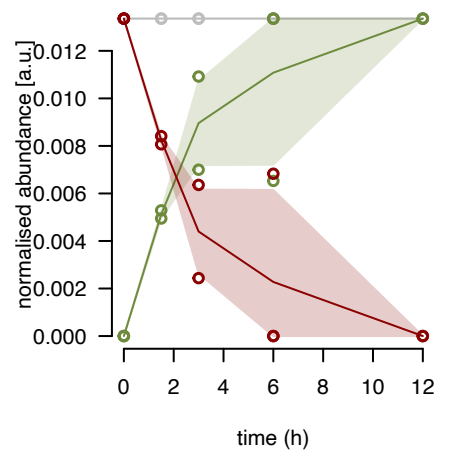**bL28m fraction 5**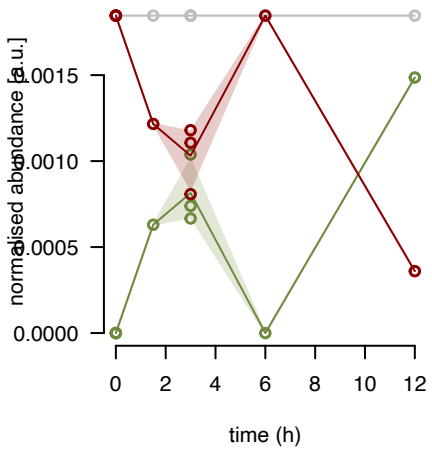**bL28m fraction 6**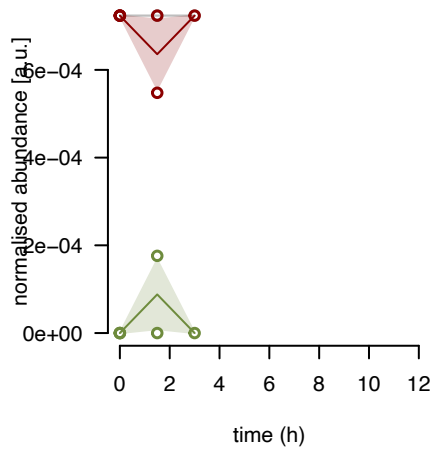**bL28m fraction 7**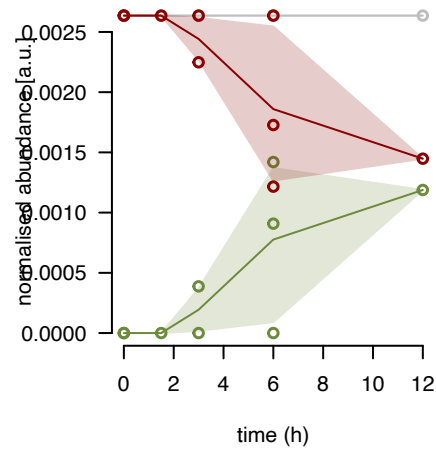**bL28m fraction 8**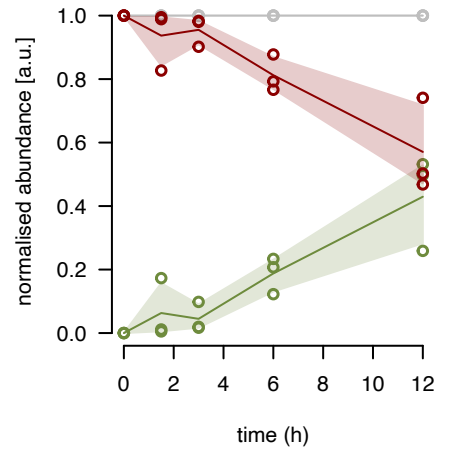**bL28m fraction 9**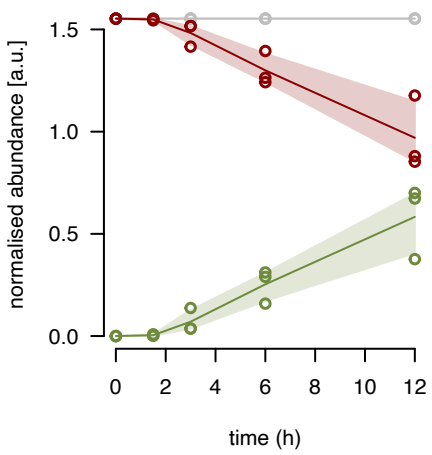**bL28m fraction 10**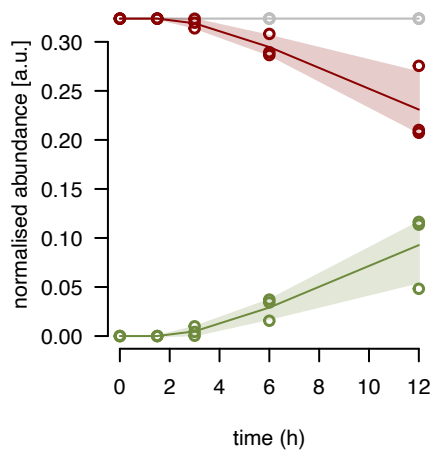**bL28m fraction 11**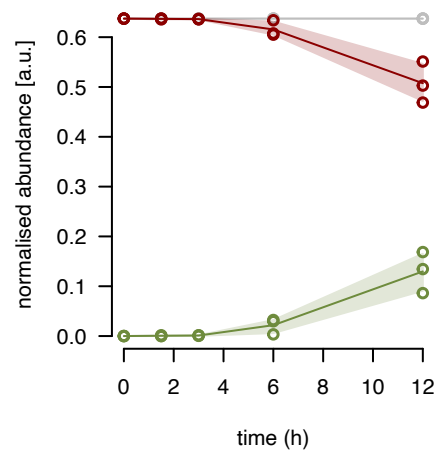**bL28m fraction 12**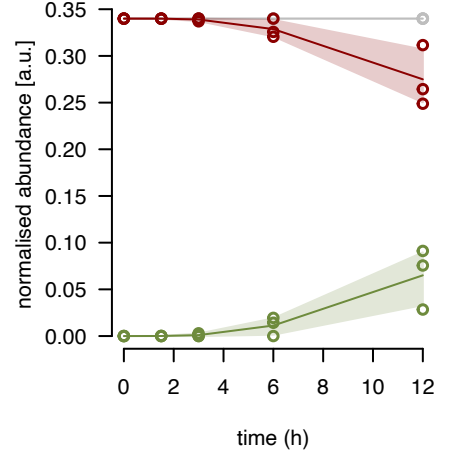**bL28m fraction 13**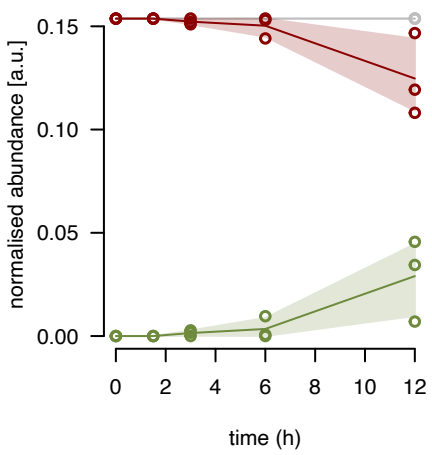**bL28m fraction 14**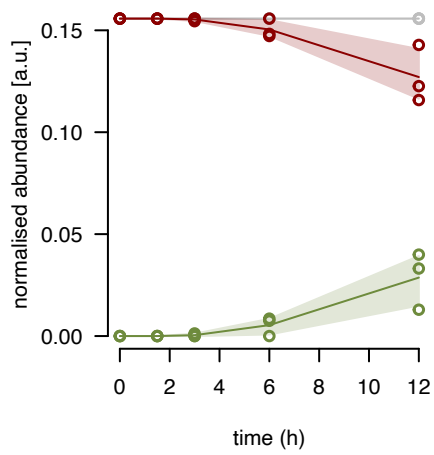**bL28m fraction 15**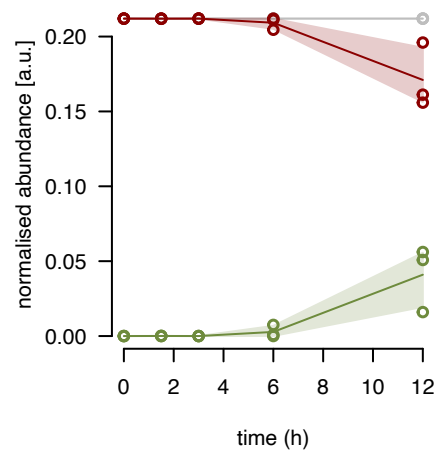**bL28m fraction 16**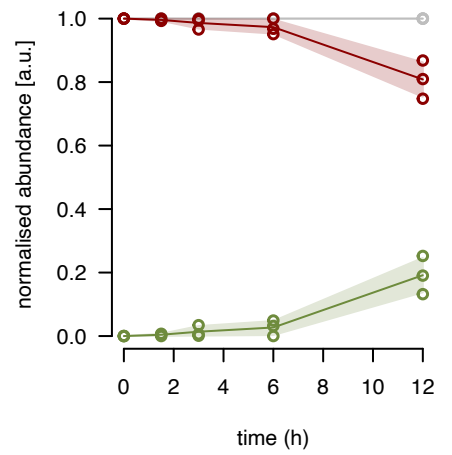

**uL29m fraction 1****uL29m fraction 2**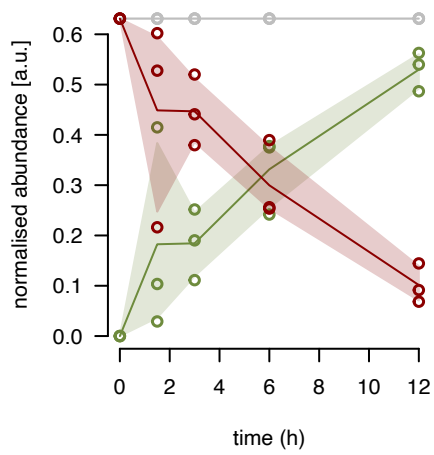**uL29m fraction 3**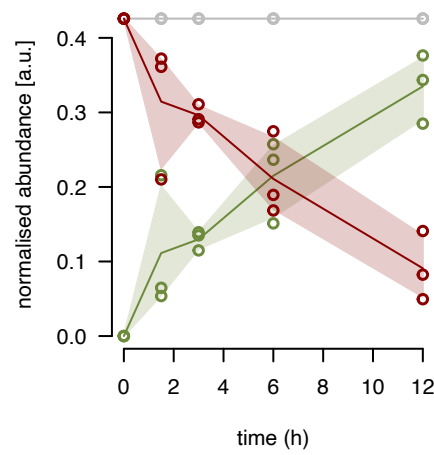**uL29m fraction 4**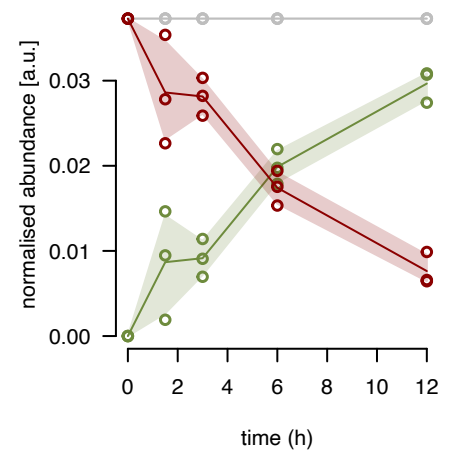**uL29m fraction 5**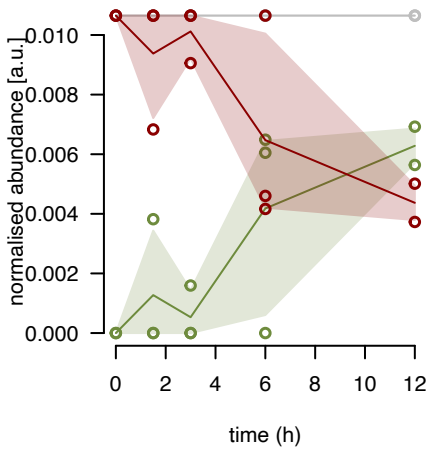**uL29m fraction 6**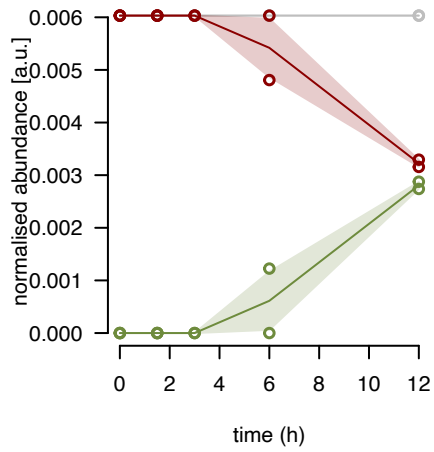**uL29m fraction 7**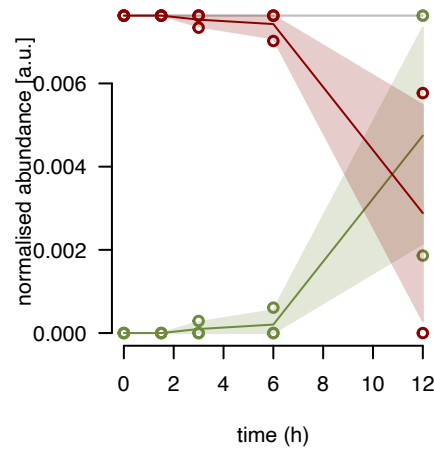**uL29m fraction 8**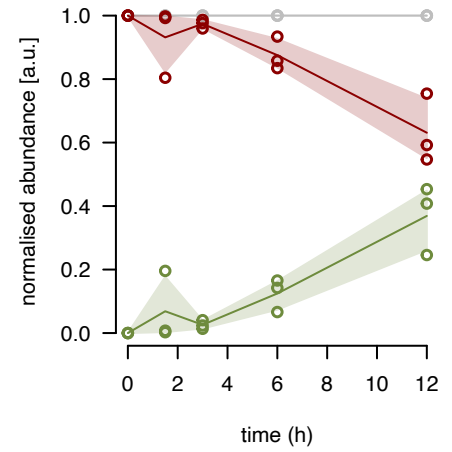**uL29m fraction 9**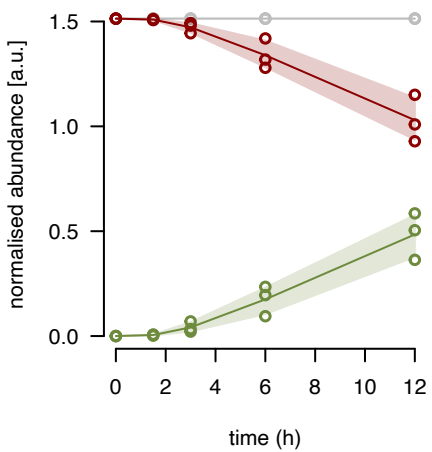**uL29m fraction 10**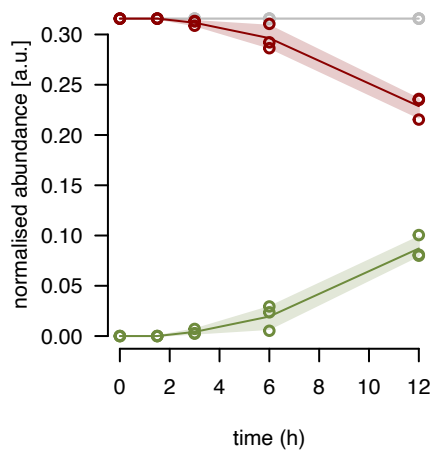**uL29m fraction 11**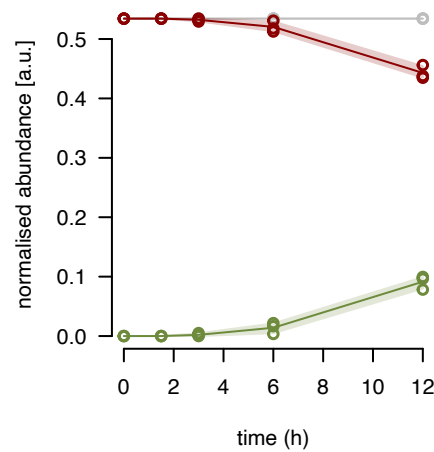**uL29m fraction 12**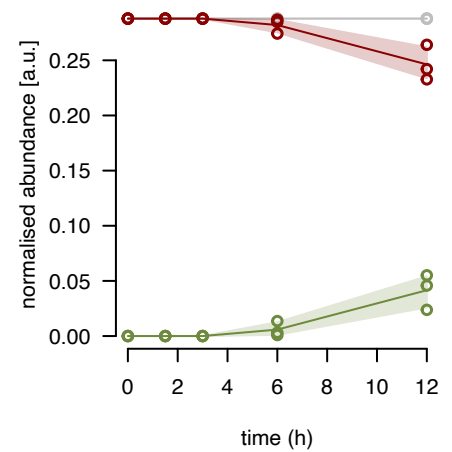**uL29m fraction 13**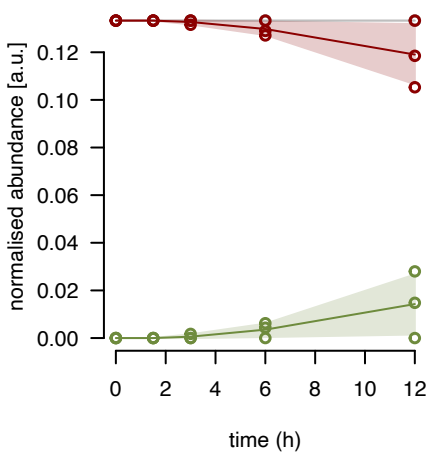**uL29m fraction 14**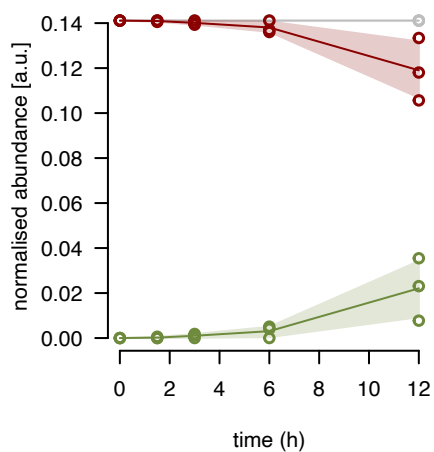**uL29m fraction 15**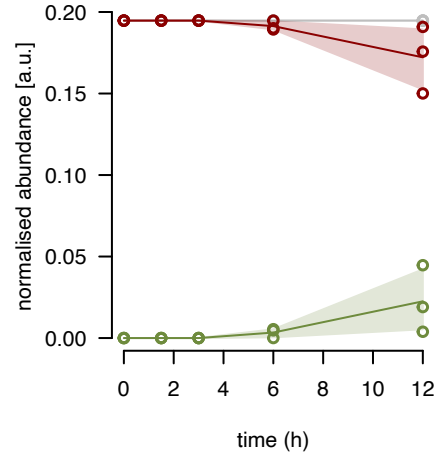**uL29m fraction 16**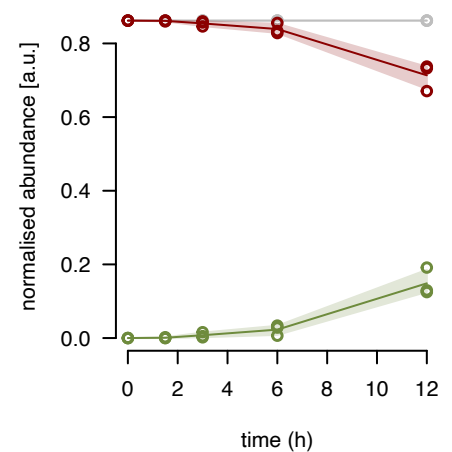

**uL30m fraction 1**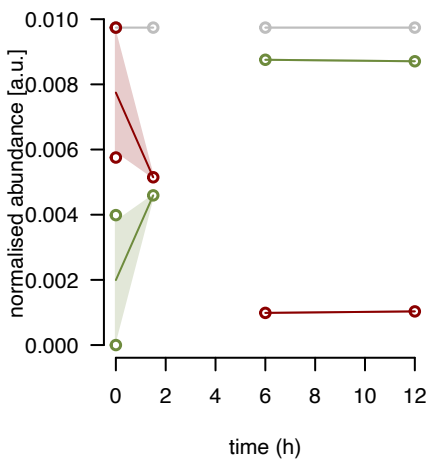**uL30m fraction 2**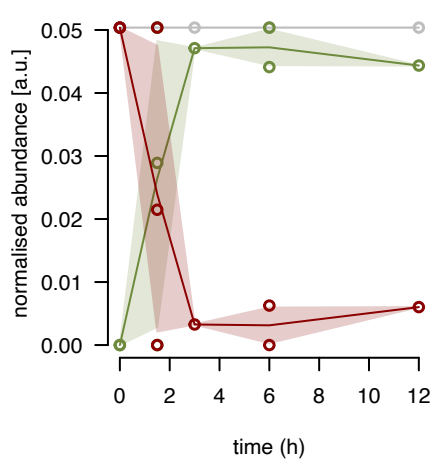**uL30m fraction 3**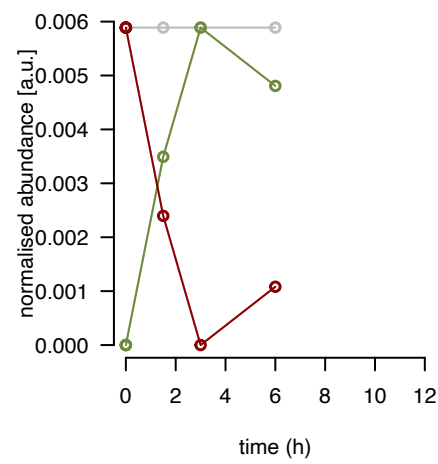**uL30m fraction 4**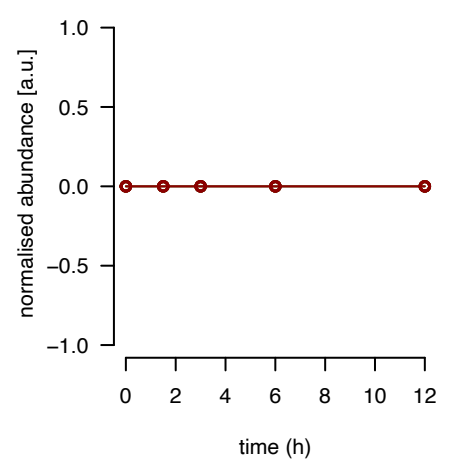**uL30m fraction 5**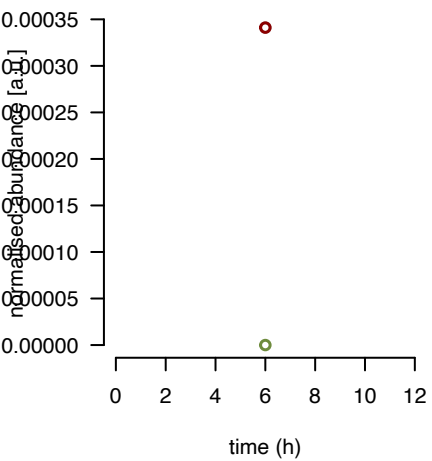**uL30m fraction 6**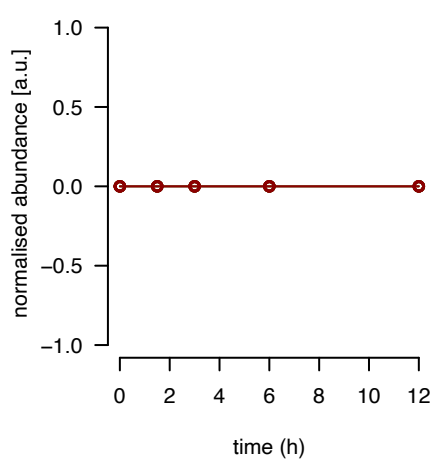**uL30m fraction 7**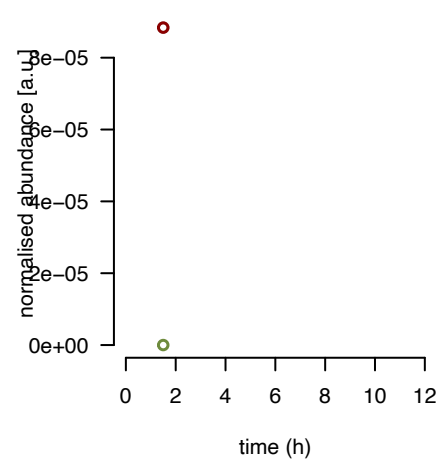**uL30m fraction 8**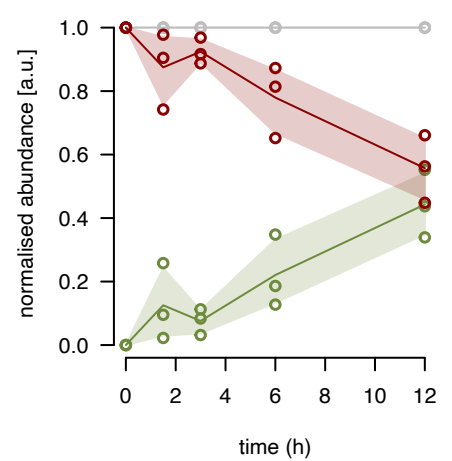**uL30m fraction 9**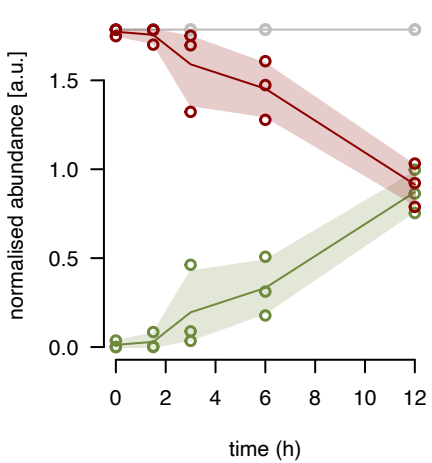**uL30m fraction 10**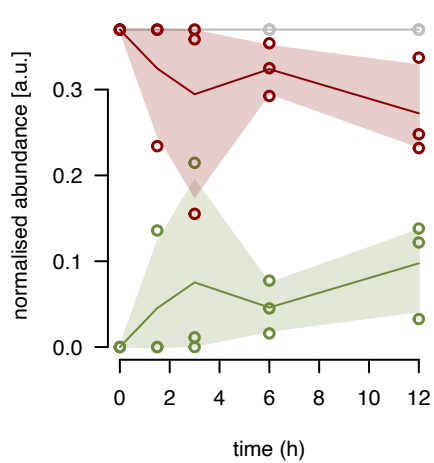**uL30m fraction 11**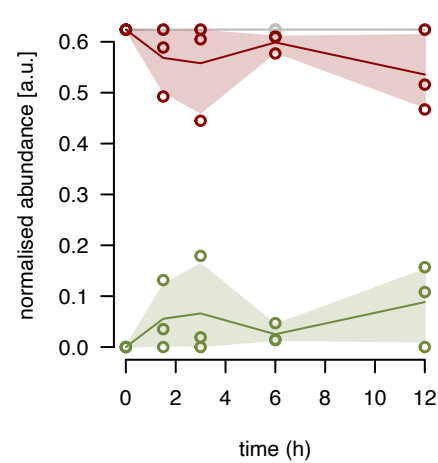**uL30m fraction 12**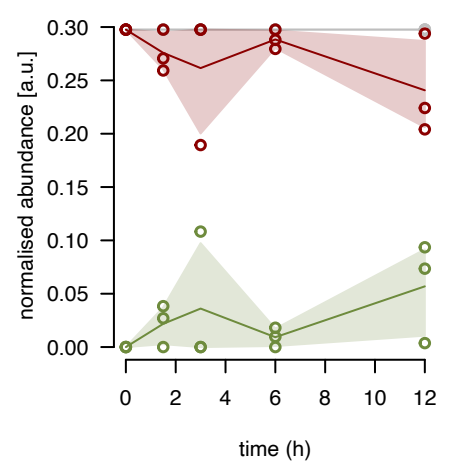**uL30m fraction 13**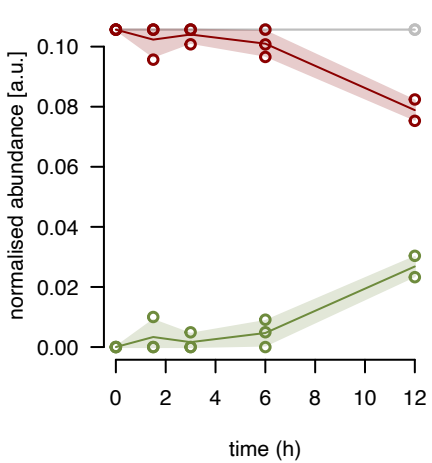**uL30m fraction 14**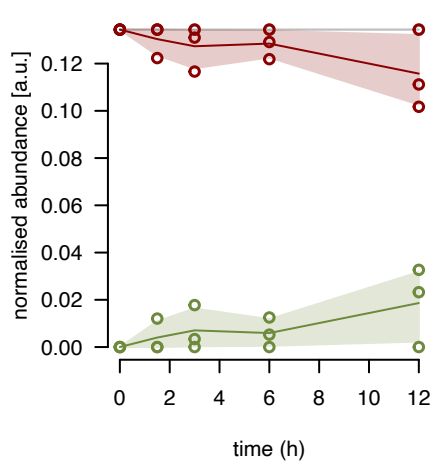**uL30m fraction 15**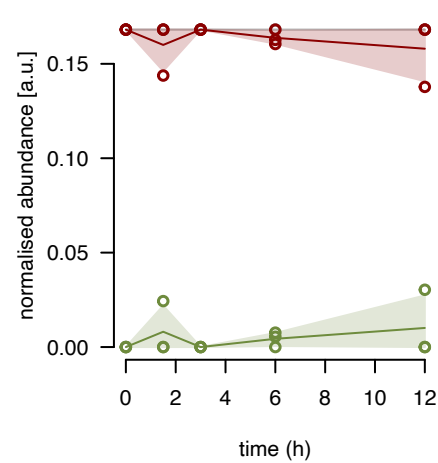**uL30m fraction 16**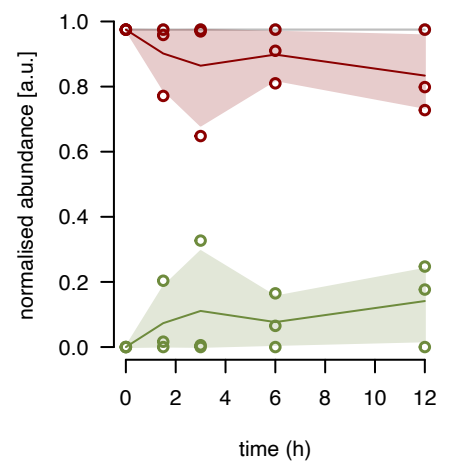



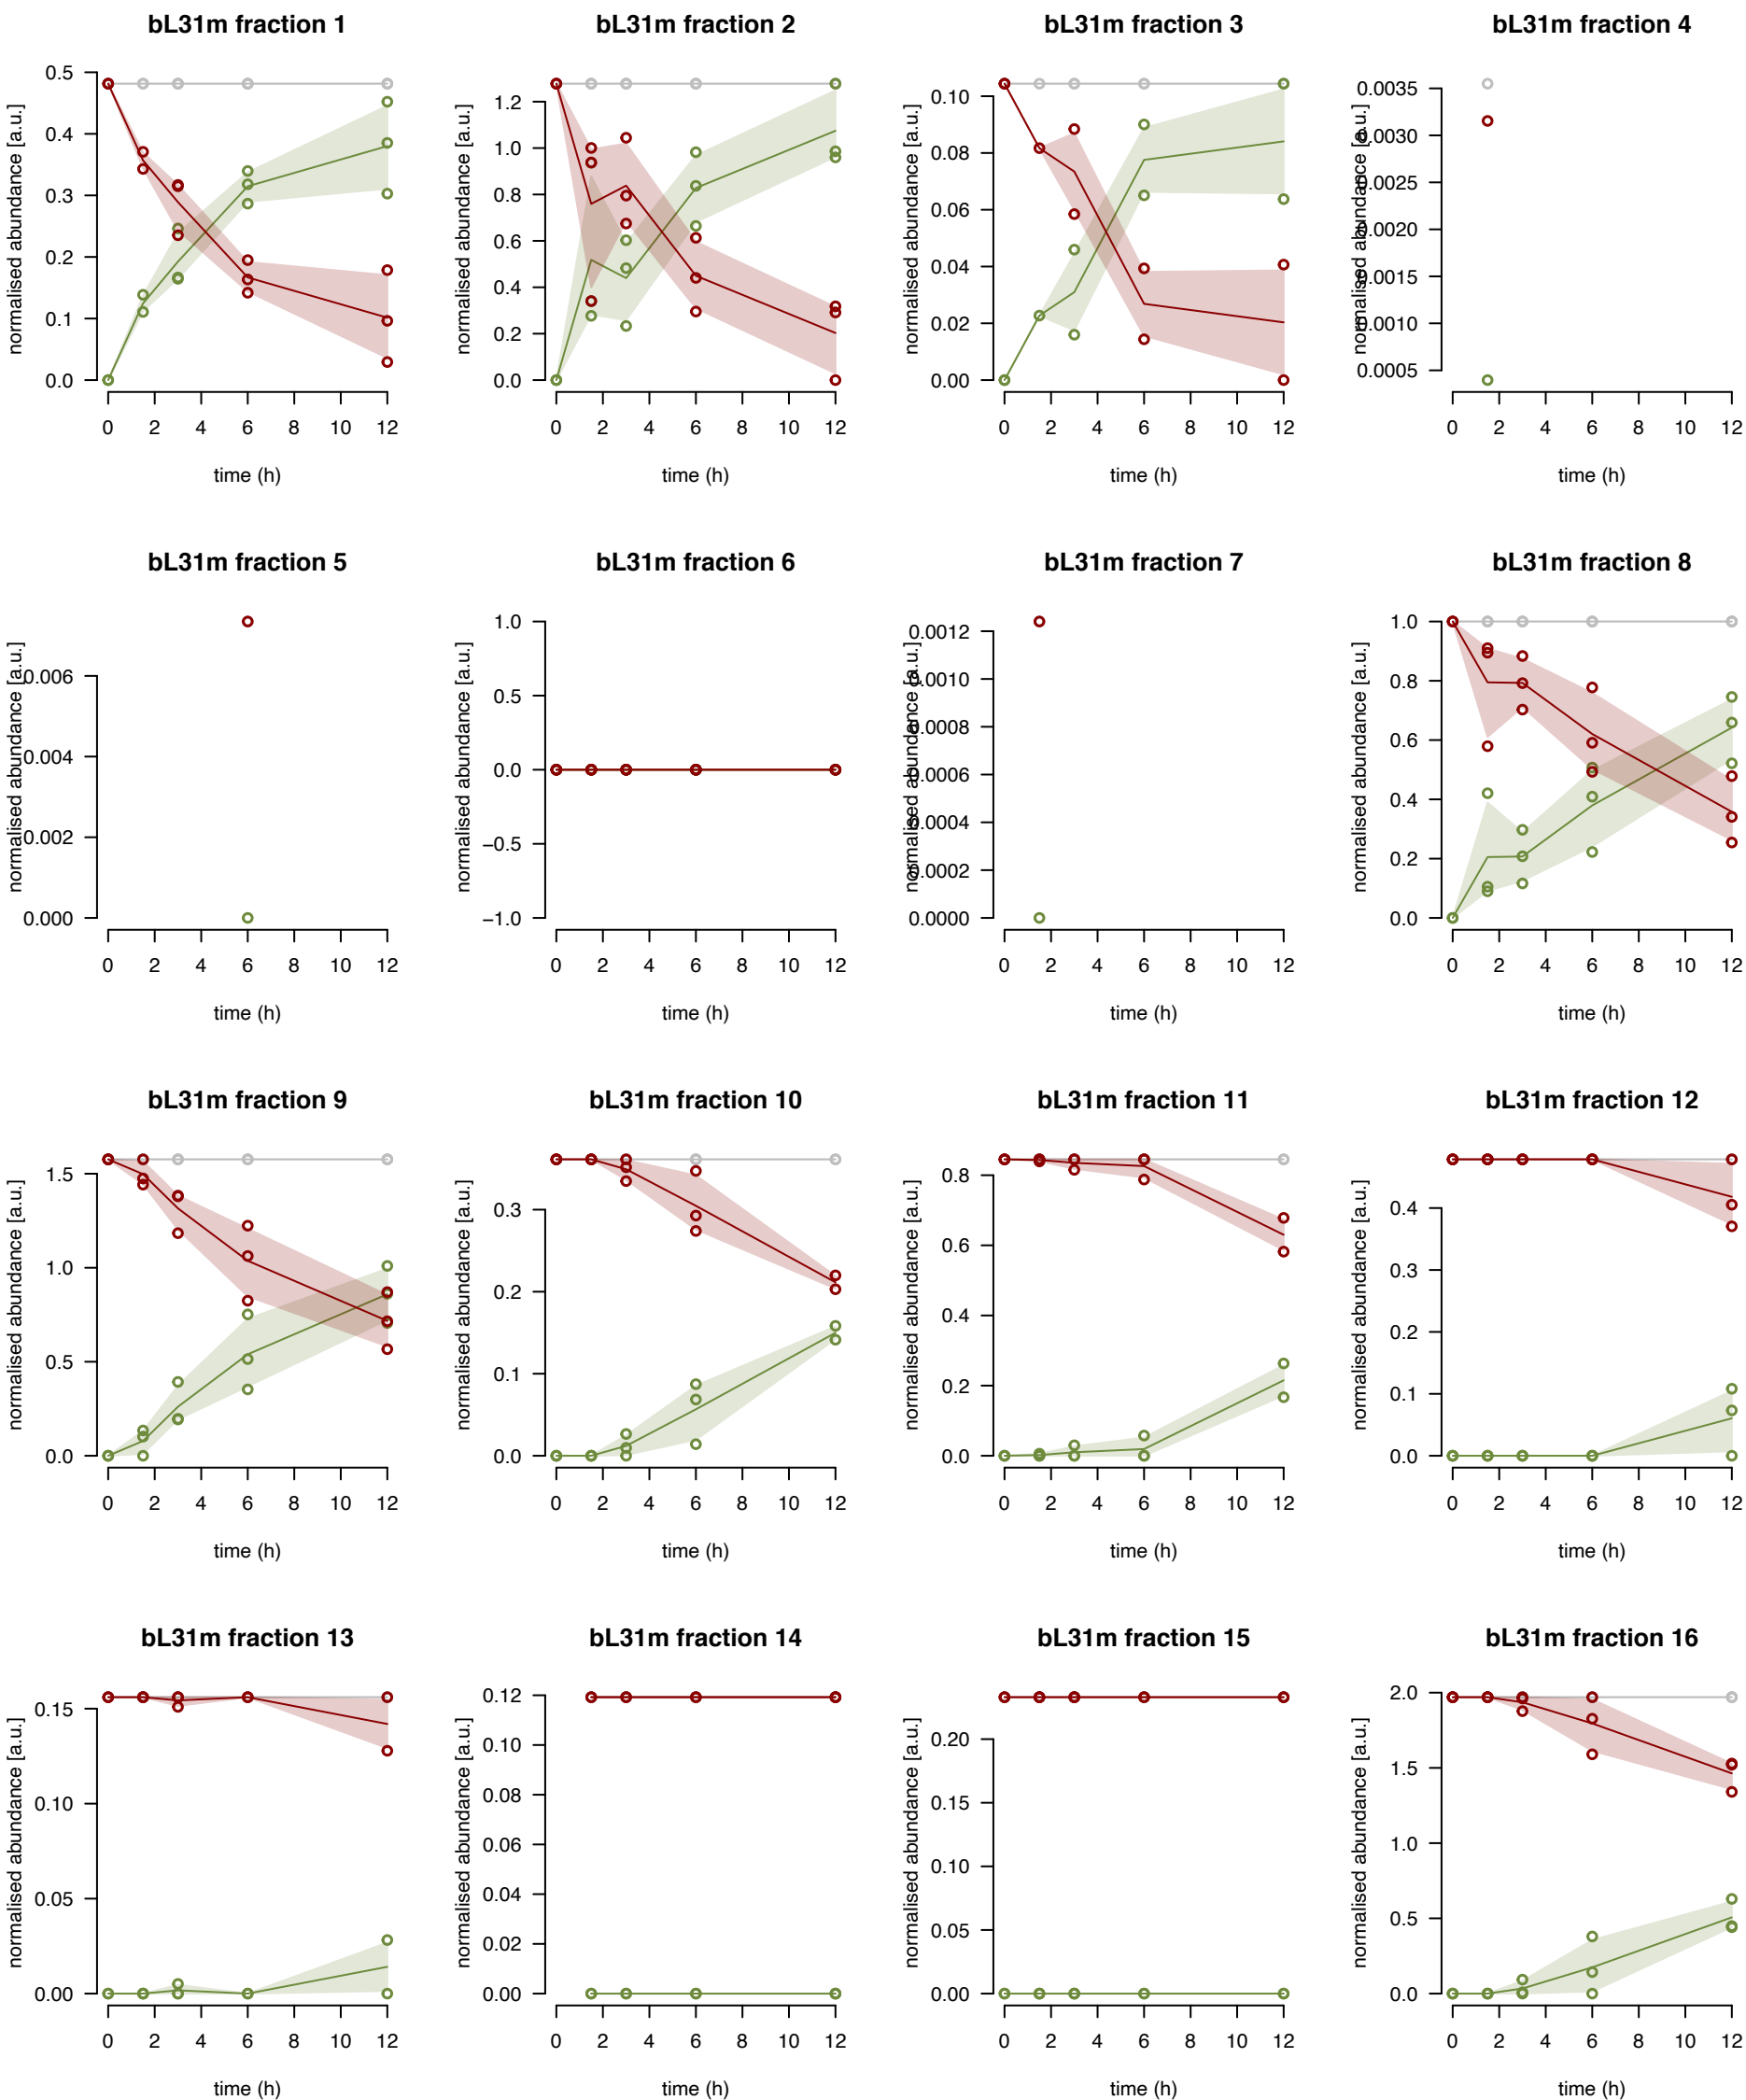

**bL32m fraction 1**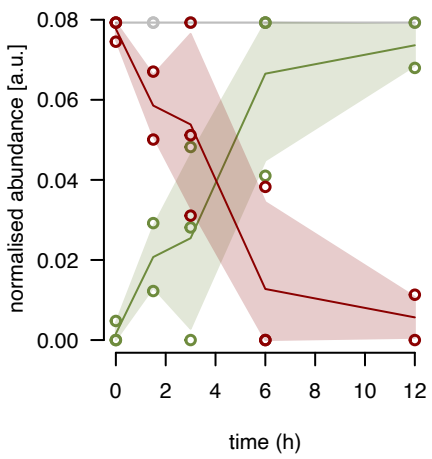**bL32m fraction 2**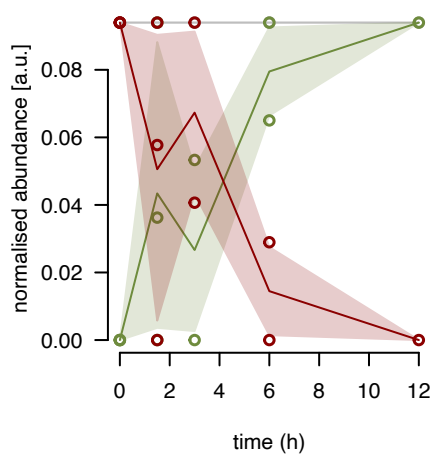**bL32m fraction 3**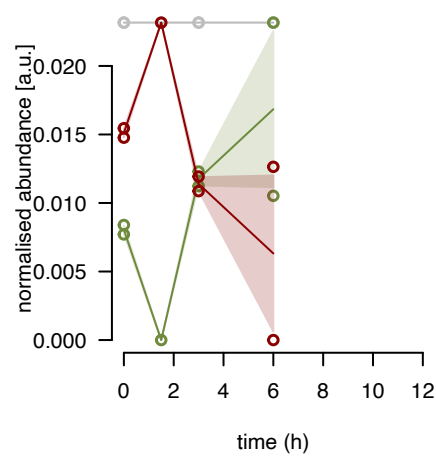**bL32m fraction 4**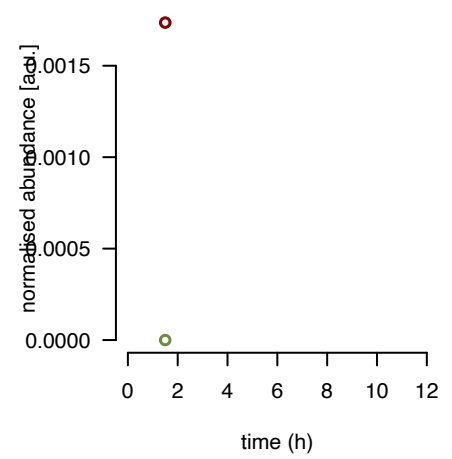**bL32m fraction 5**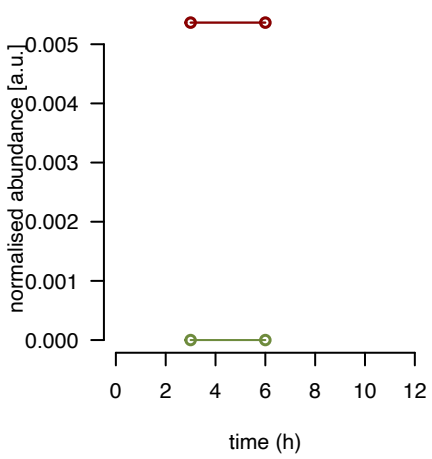**bL32m fraction 6**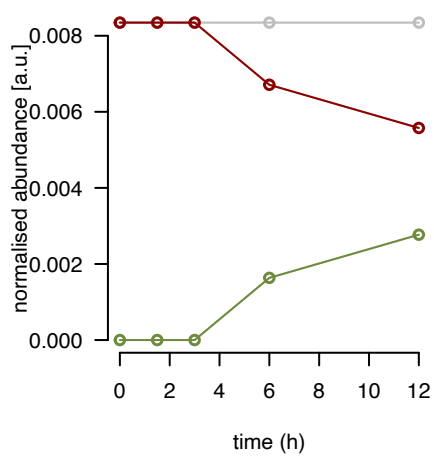**bL32m fraction 7**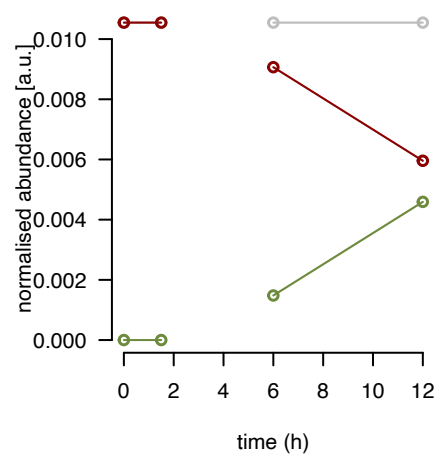**bL32m fraction 8**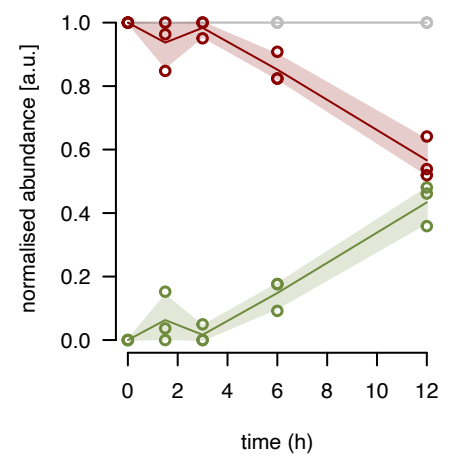**bL32m fraction 9**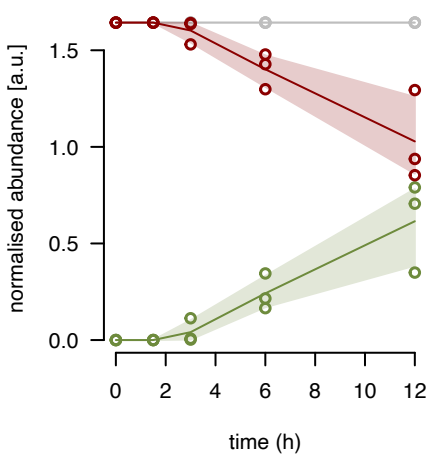**bL32m fraction 10**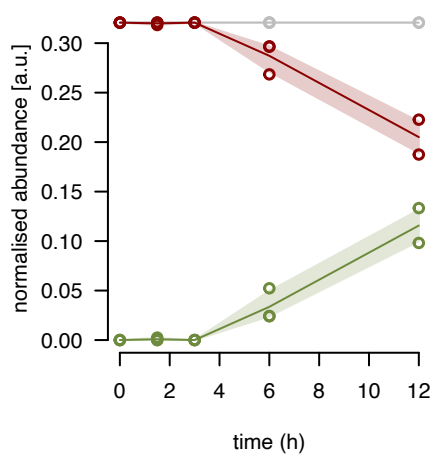**bL32m fraction 11**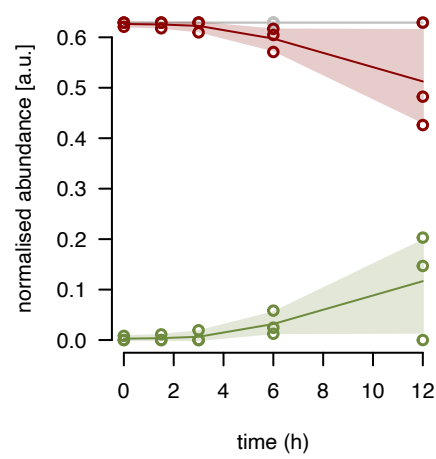**bL32m fraction 12**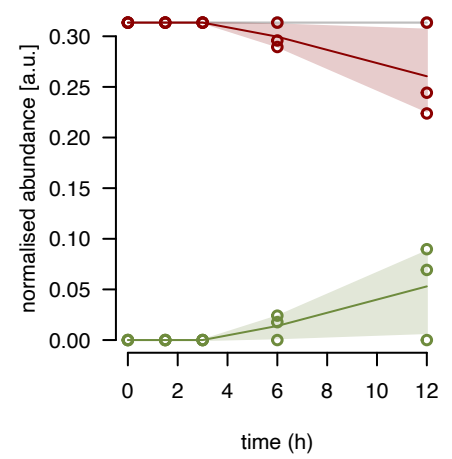**bL32m fraction 13**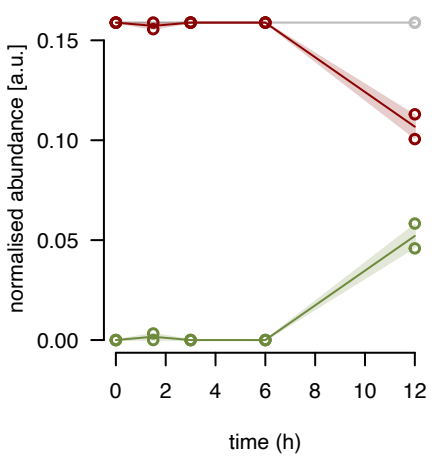**bL32m fraction 14**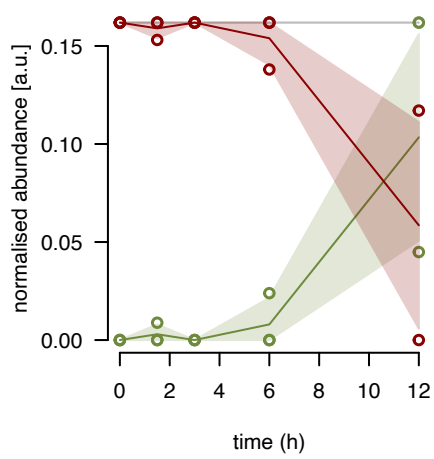**bL32m fraction 15**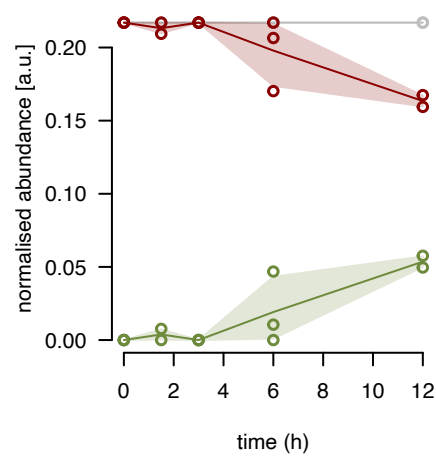**bL32m fraction 16**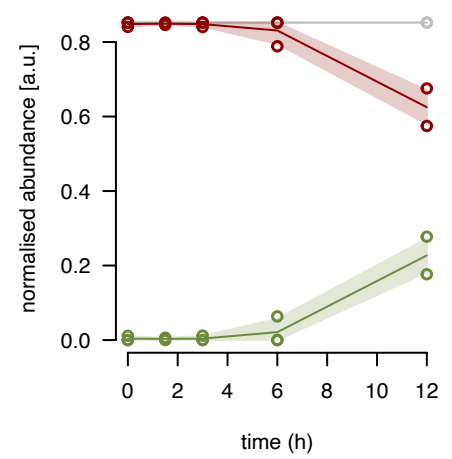

**bL33m fraction 1**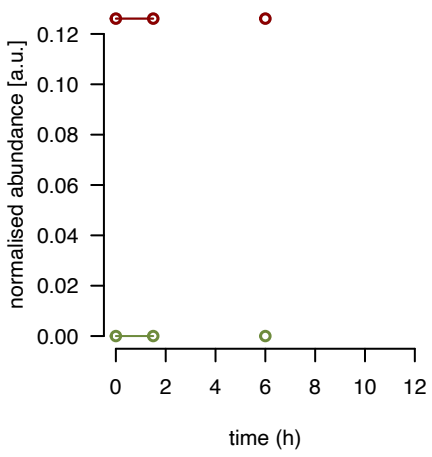**bL33m fraction 2**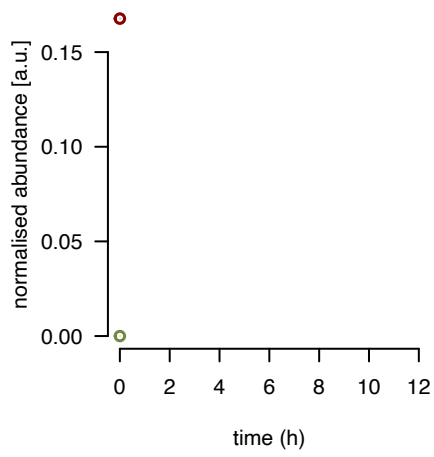**bL33m fraction 3**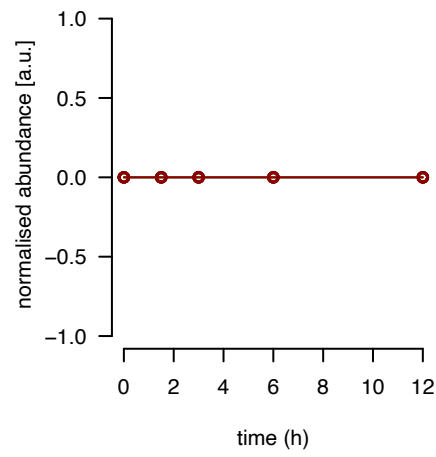**bL33m fraction 4**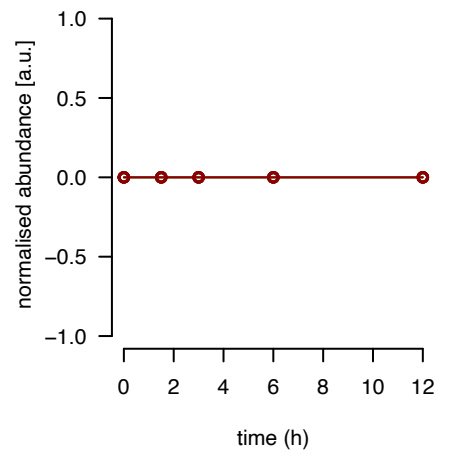**bL33m fraction 5**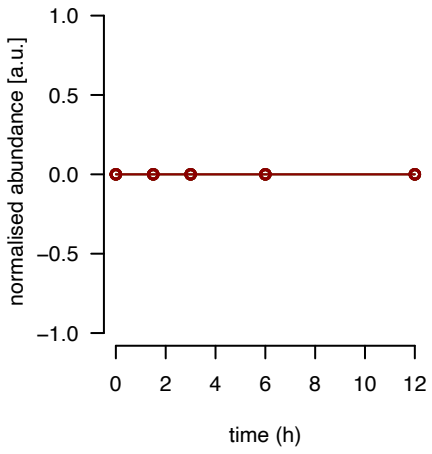**bL33m fraction 6**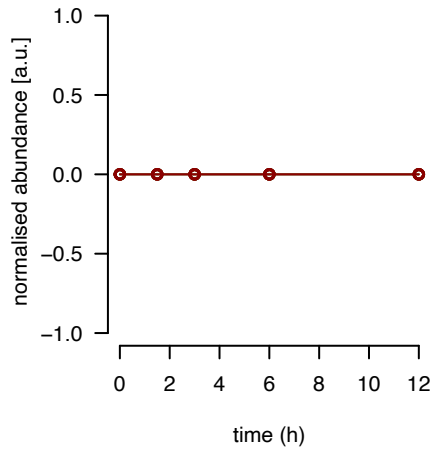**bL33m fraction 7**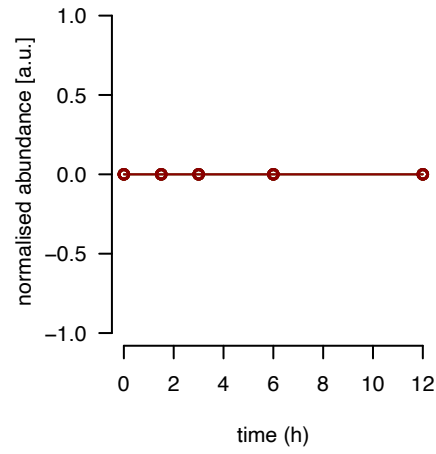**bL33m fraction 8**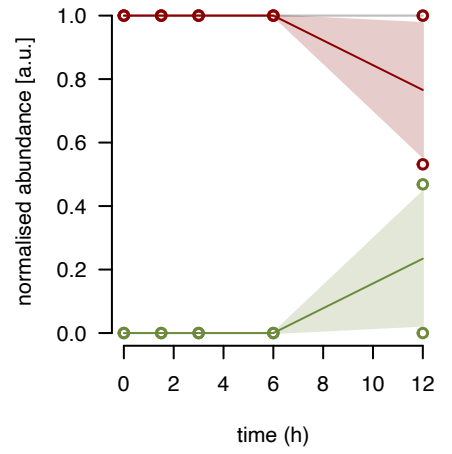**bL33m fraction 9**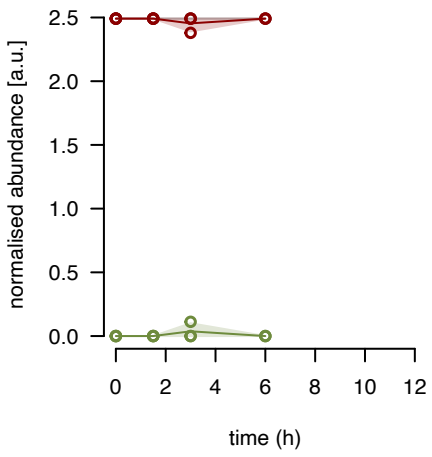**bL33m fraction 10**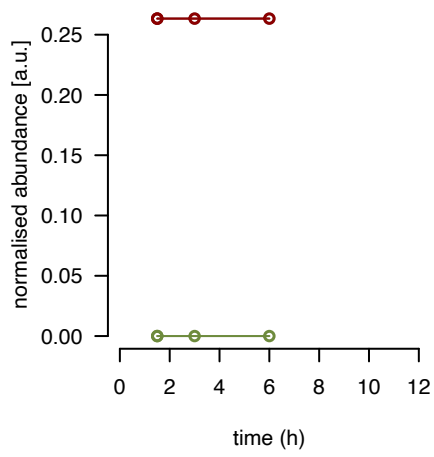**bL33m fraction 11**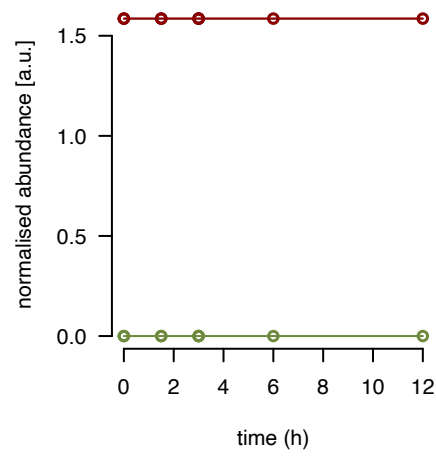**bL33m fraction 12**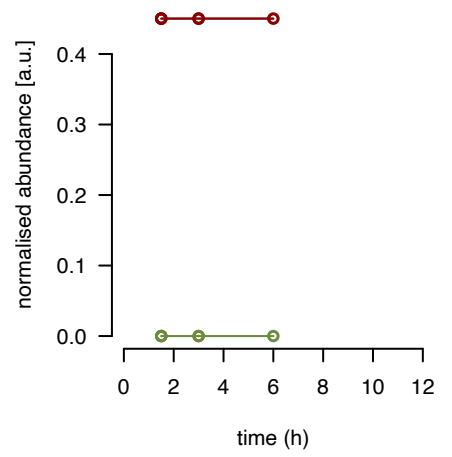**bL33m fraction 13**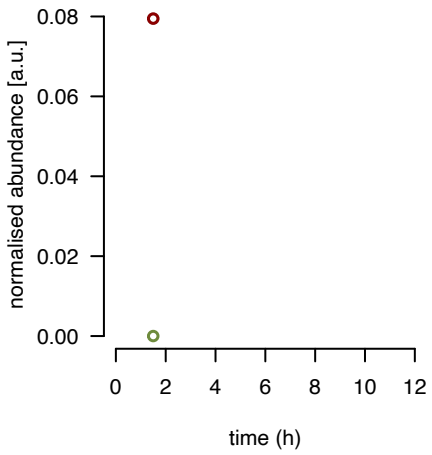**bL33m fraction 14**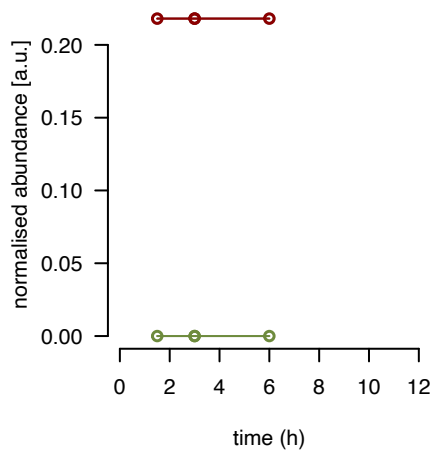**bL33m fraction 15**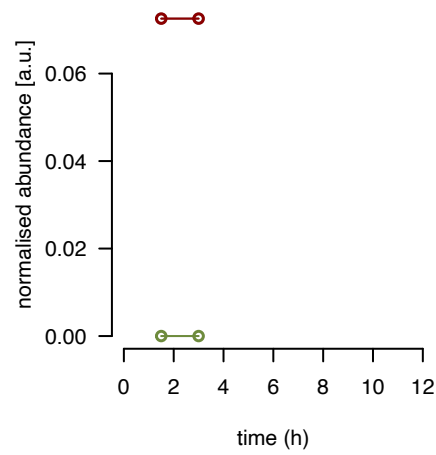**bL33m fraction 16**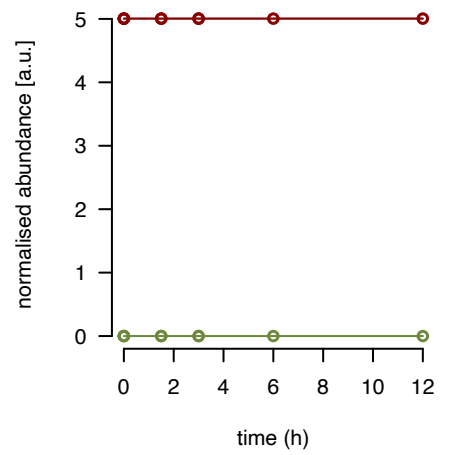

**bL34m fraction 1**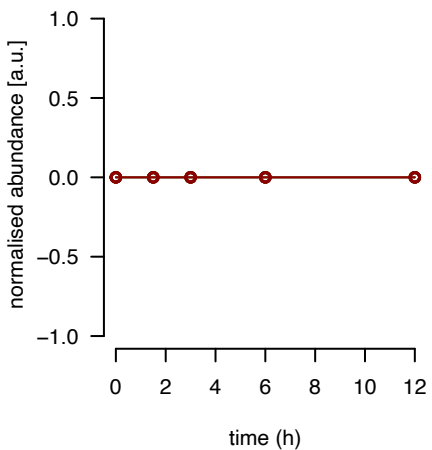**bL34m fraction 2**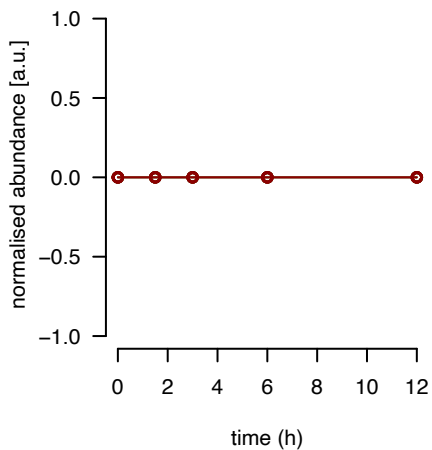**bL34m fraction 3**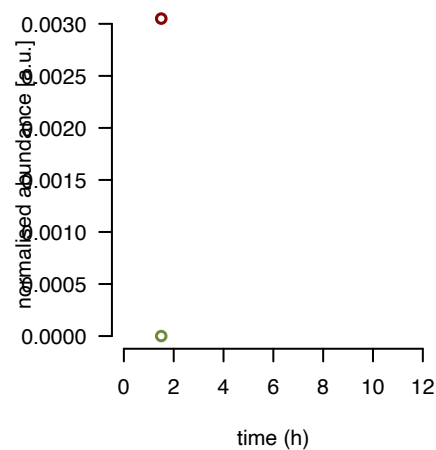**bL34m fraction 4**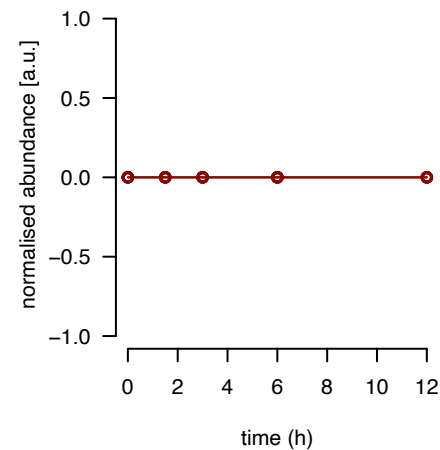**bL34m fraction 5****bL34m fraction 6**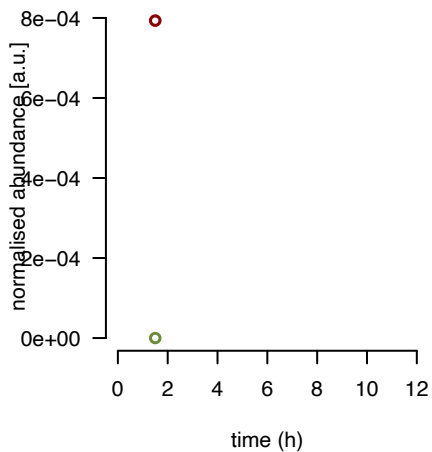**bL34m fraction 7**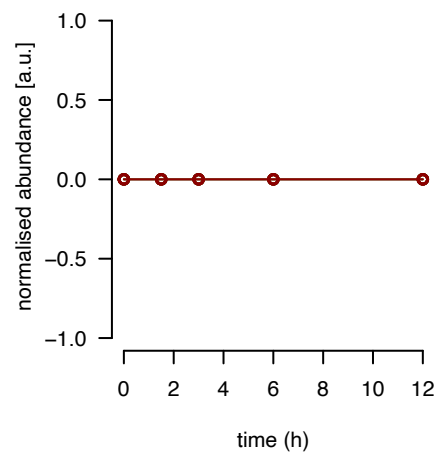**bL34m fraction 8**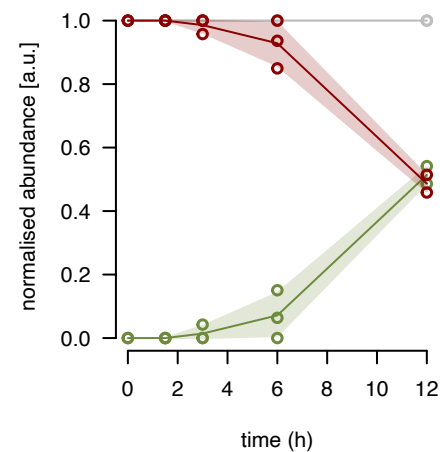**bL34m fraction 9**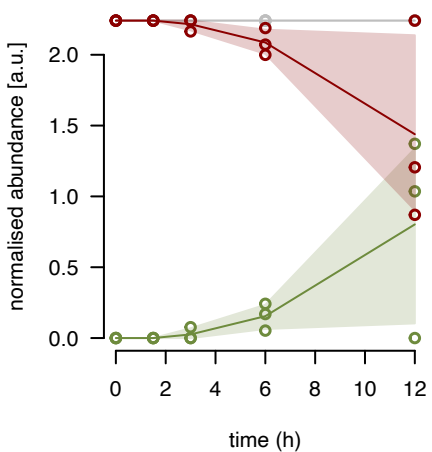**bL34m fraction 10**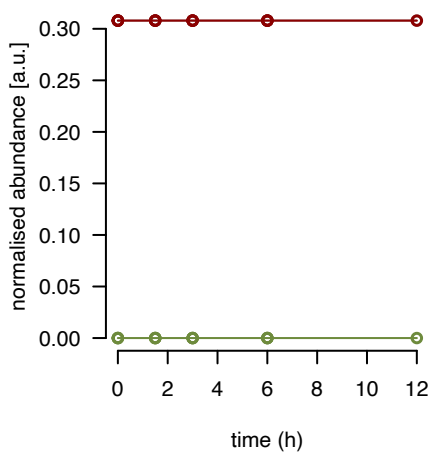**bL34m fraction 11**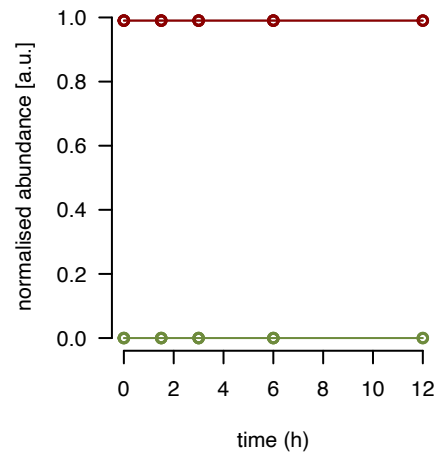**bL34m fraction 12**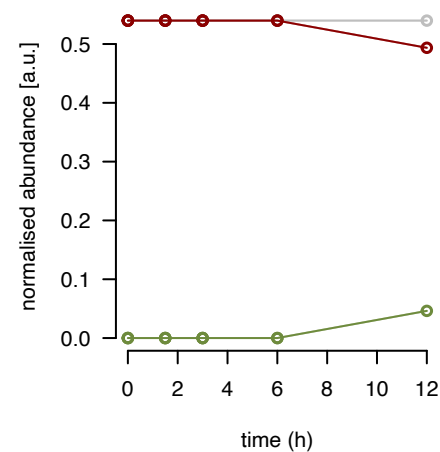**bL34m fraction 13**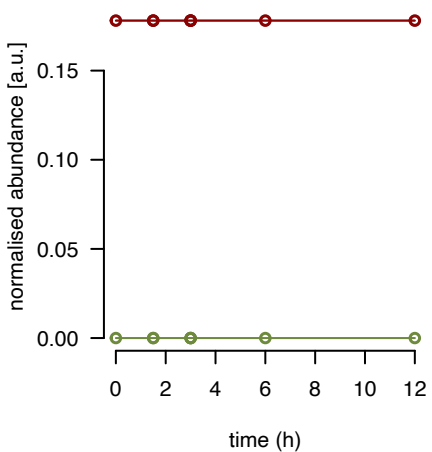**bL34m fraction 14**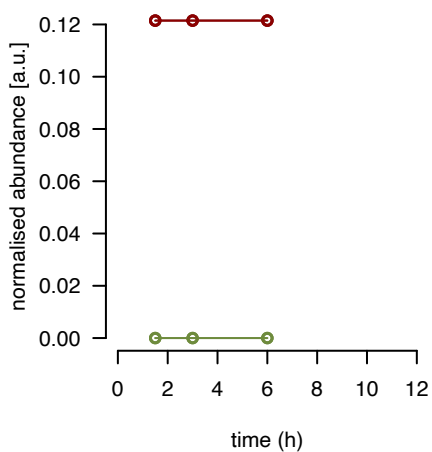**bL34m fraction 15**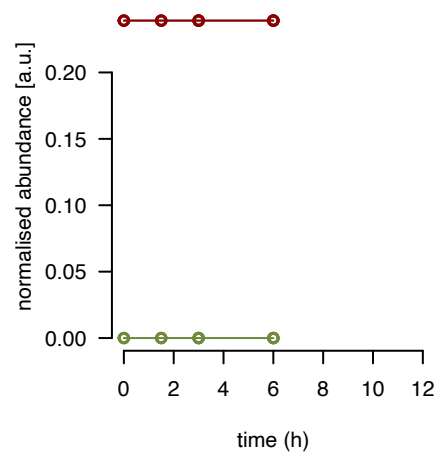**bL34m fraction 16**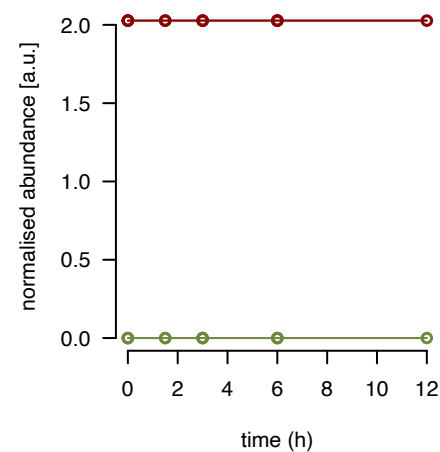

**bL35m fraction 1****bL35m fraction 2**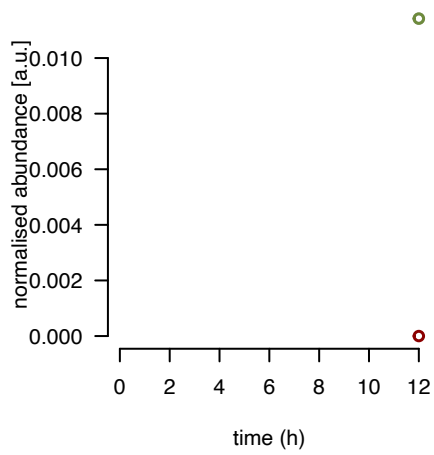**bL35m fraction 3**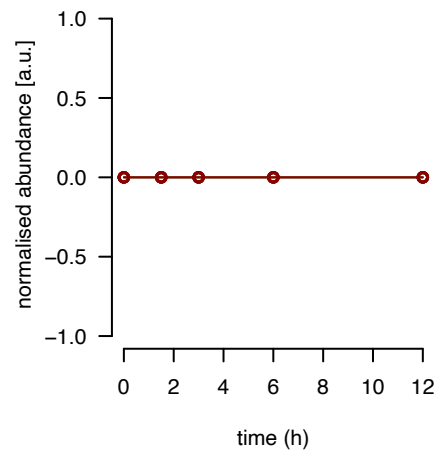**bL35m fraction 4**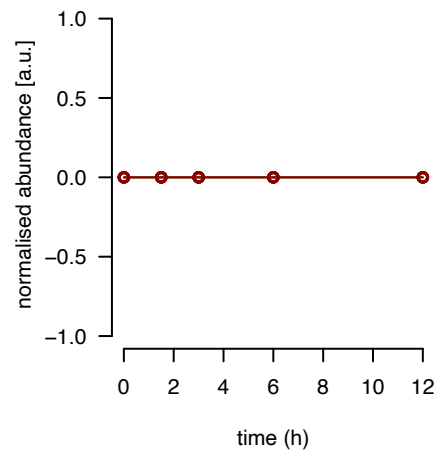**bL35m fraction 5****bL35m fraction 6**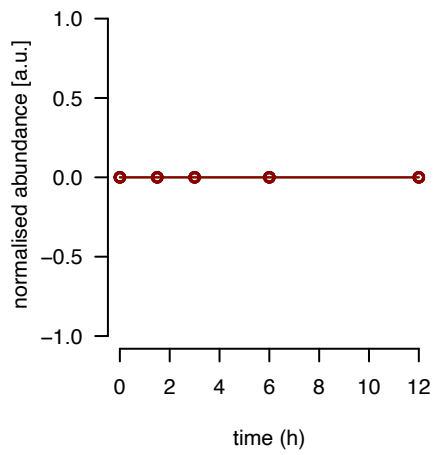**bL35m fraction 7****bL35m fraction 8**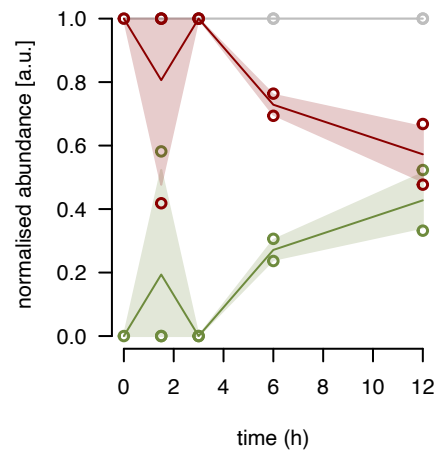**bL35m fraction 9**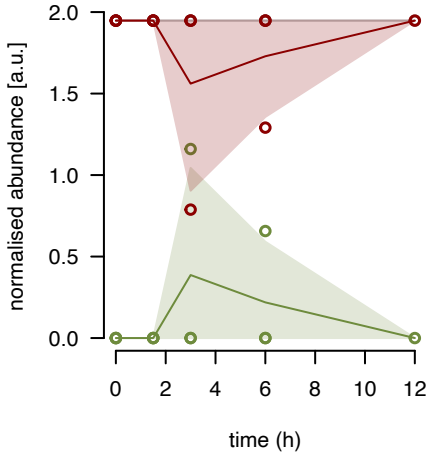**bL35m fraction 10**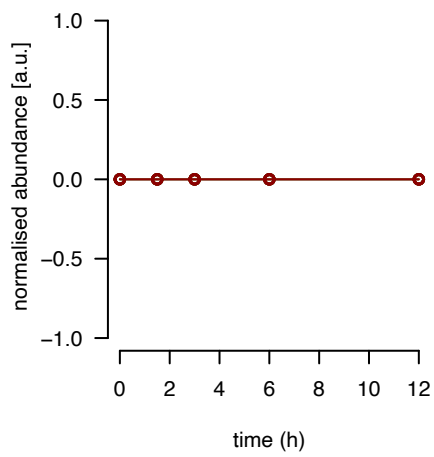**bL35m fraction 11**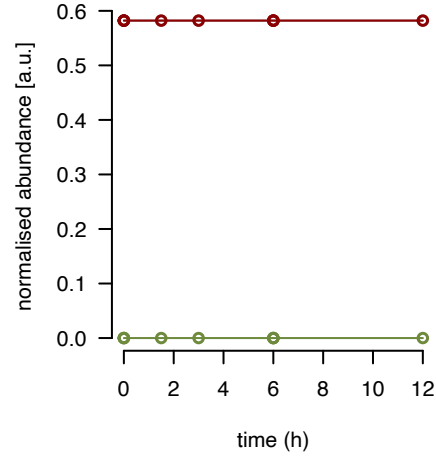**bL35m fraction 12**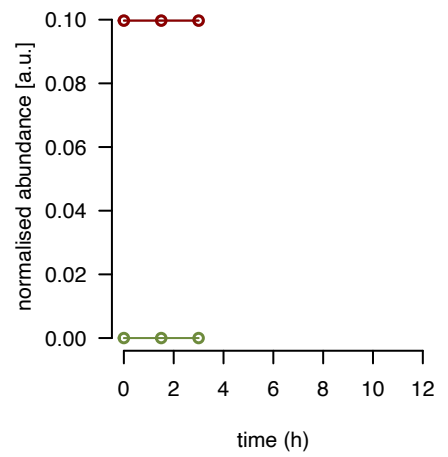**bL35m fraction 13**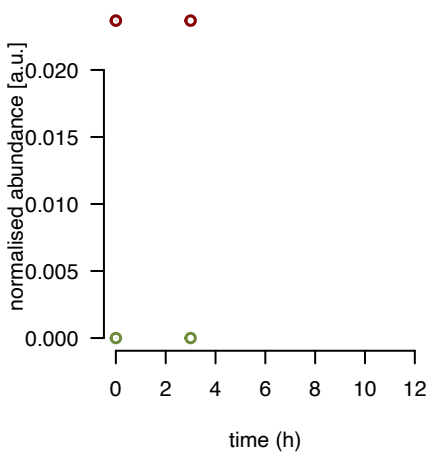**bL35m fraction 14**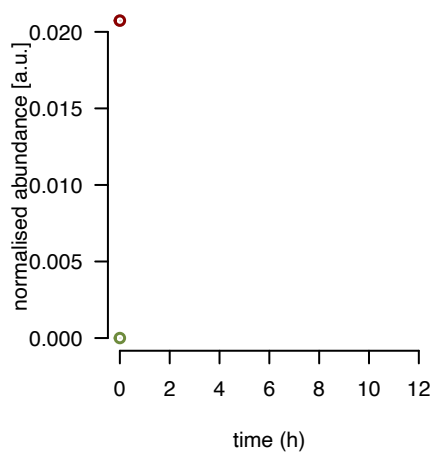**bL35m fraction 15**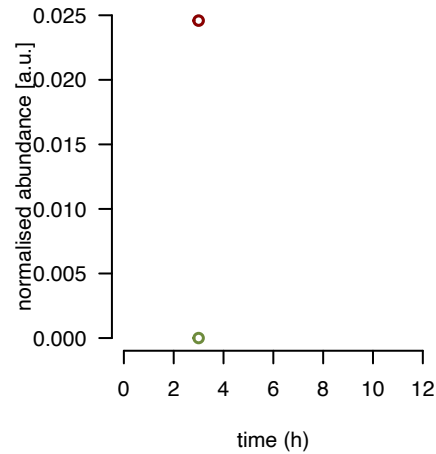**bL35m fraction 16**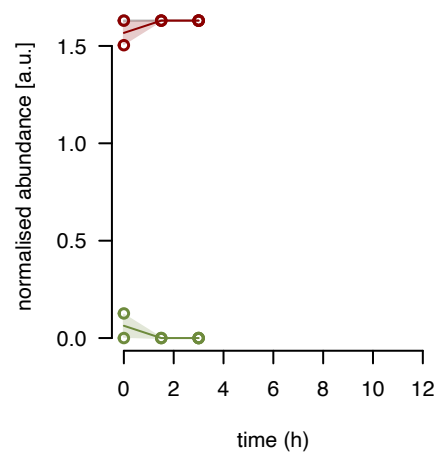

**bL36m fraction 1**

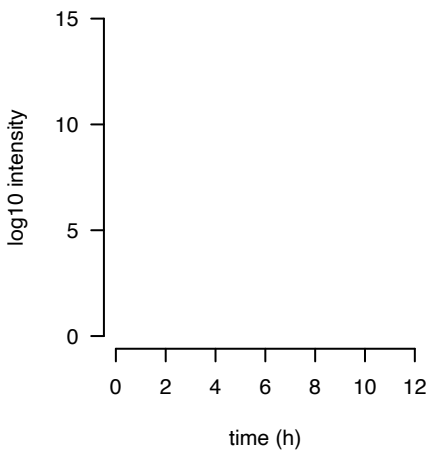

**bL36m fraction 2**

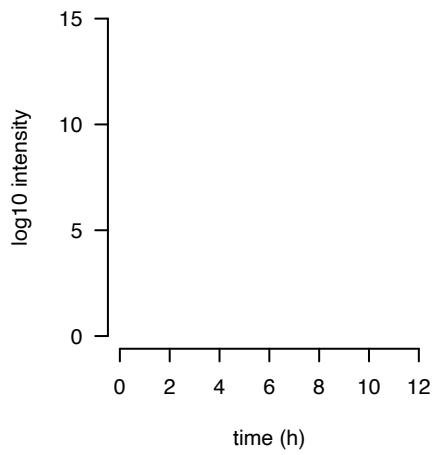

**bL36m fraction 3**

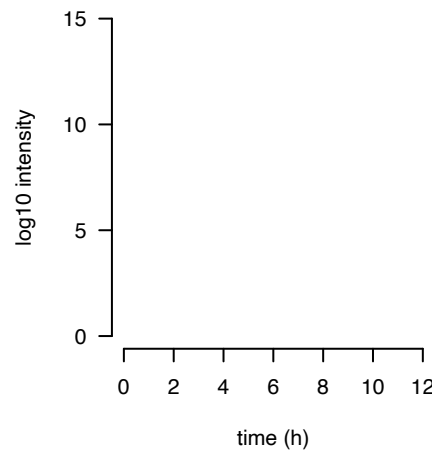

**bL36m fraction 4**

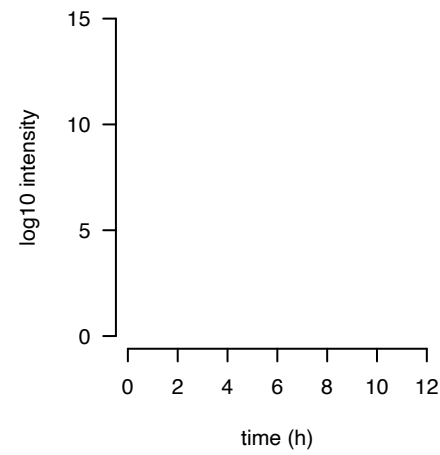

**bL36m fraction 5**



**bL36m fraction 6**



**bL36m fraction 7**



**bL36m fraction 8**



**bL36m fraction 9**



**bL36m fraction 10**



**bL36m fraction 11**



**bL36m fraction 12**



**bL36m fraction 13**



**bL36m fraction 14**



**bL36m fraction 15**



**bL36m fraction 16**



**mL37 fraction 1**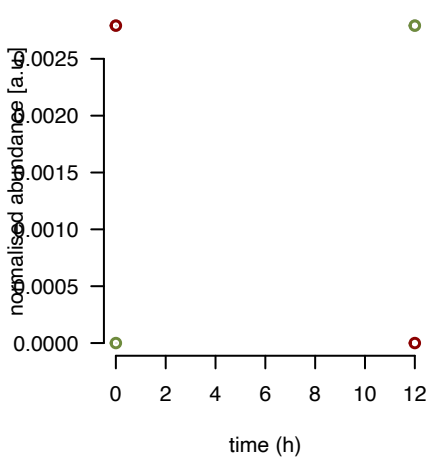**mL37 fraction 2**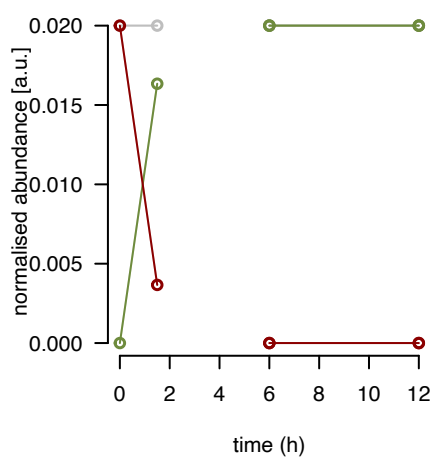**mL37 fraction 3**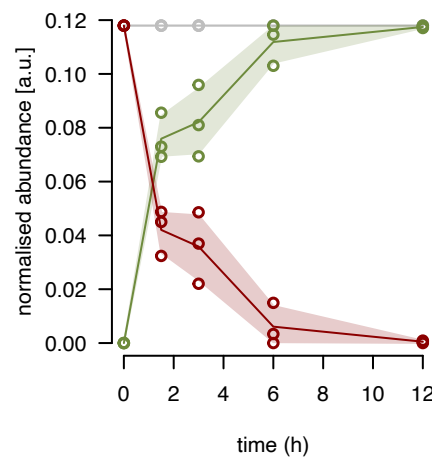**mL37 fraction 4**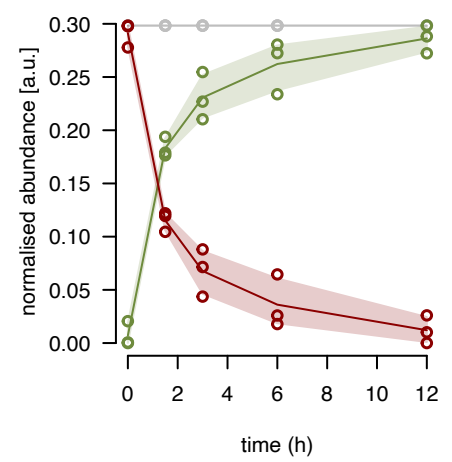**mL37 fraction 5**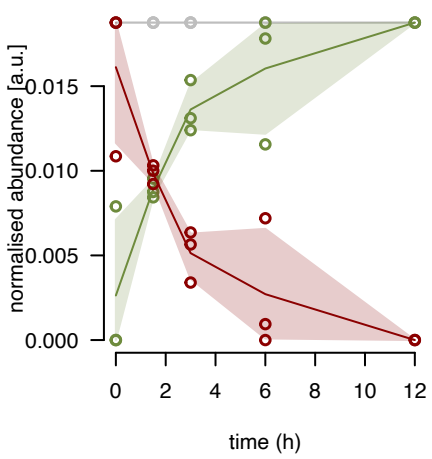**mL37 fraction 6**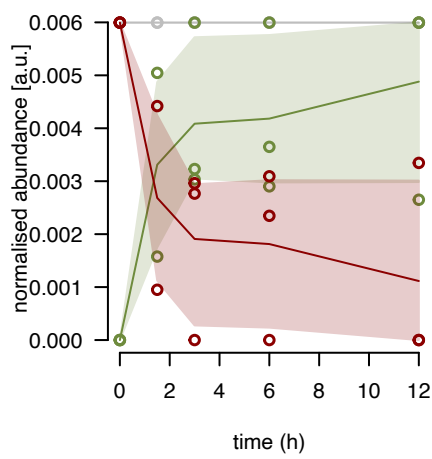**mL37 fraction 7**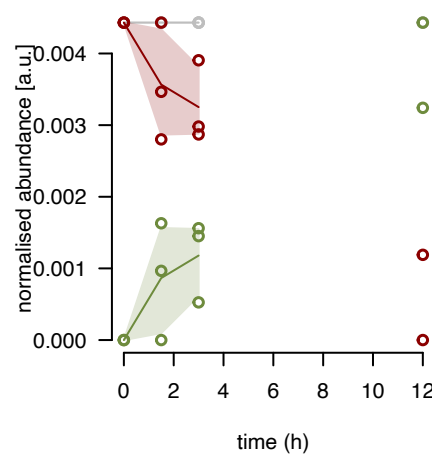**mL37 fraction 8**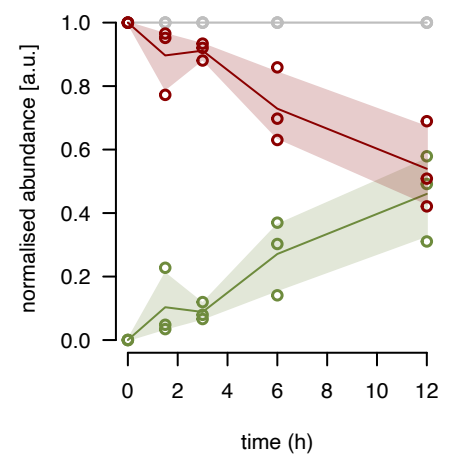**mL37 fraction 9**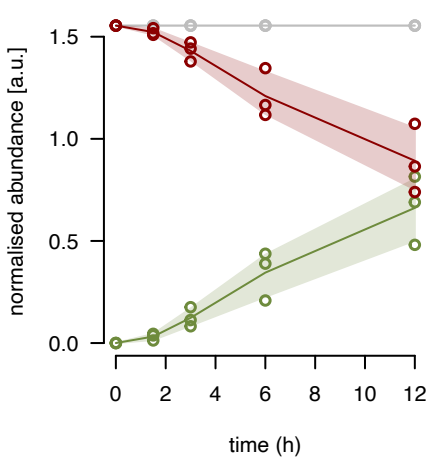**mL37 fraction 10**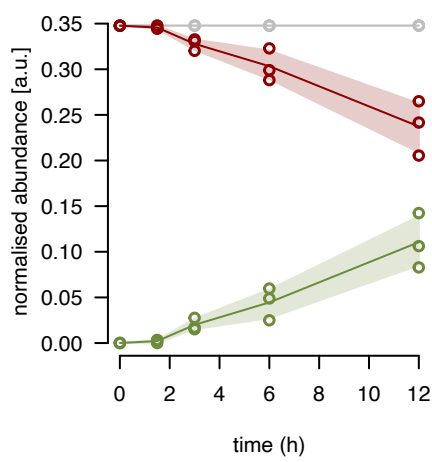**mL37 fraction 11**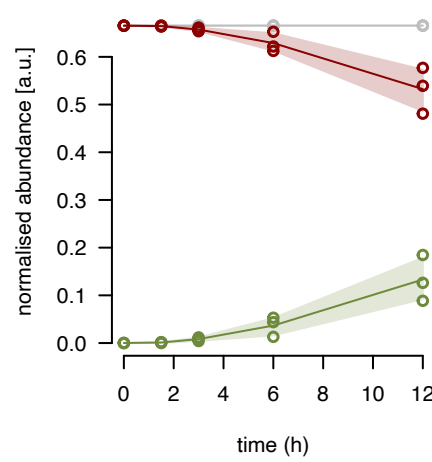**mL37 fraction 12**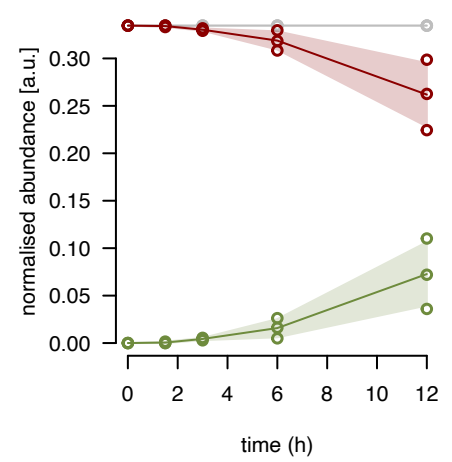**mL37 fraction 13**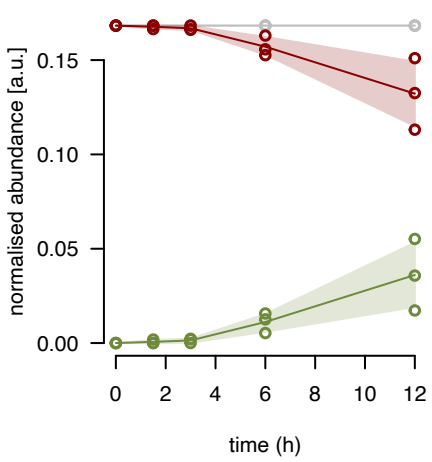**mL37 fraction 14**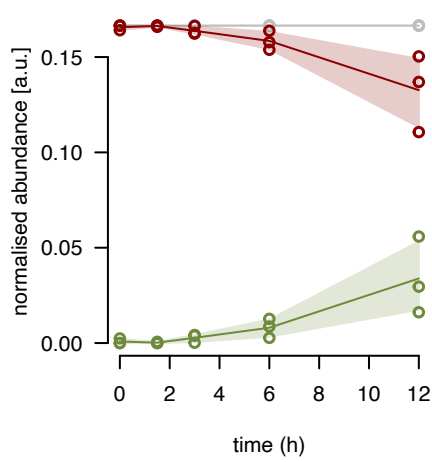**mL37 fraction 15**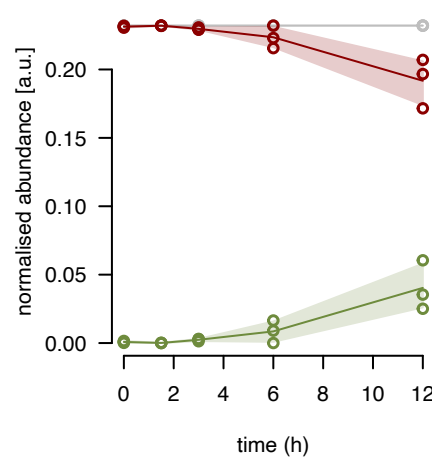**mL37 fraction 16**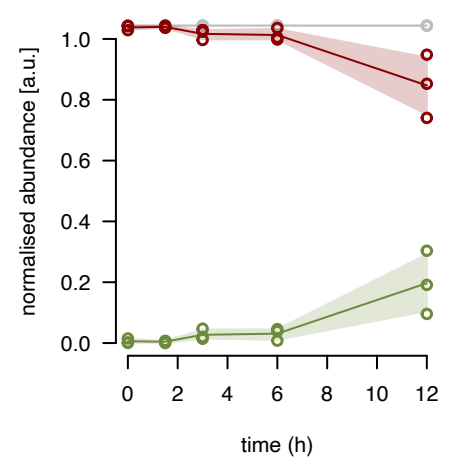

**mL38 fraction 1**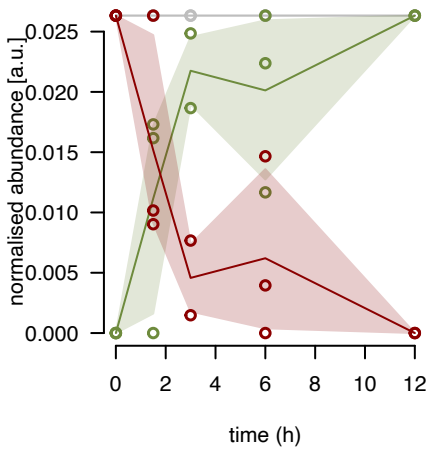**mL38 fraction 2**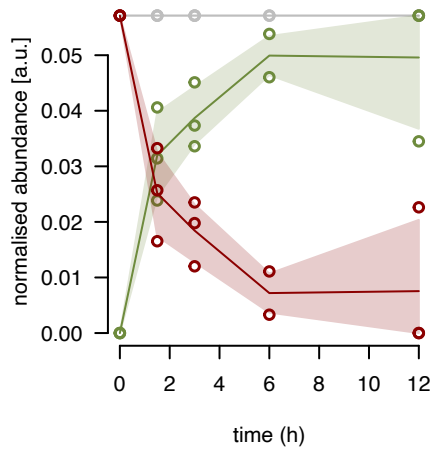**mL38 fraction 3**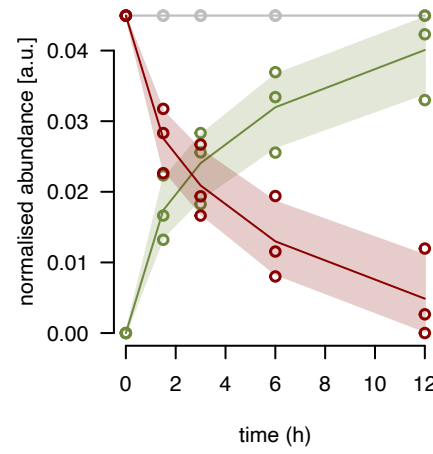**mL38 fraction 4**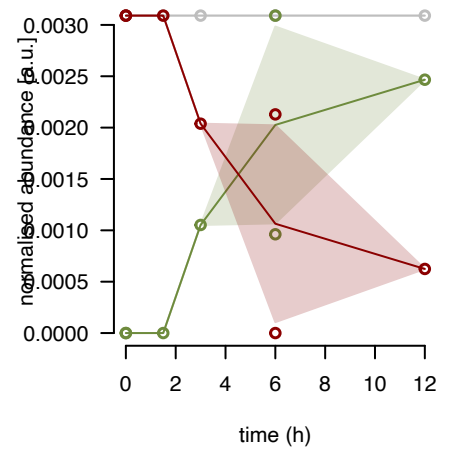**mL38 fraction 5**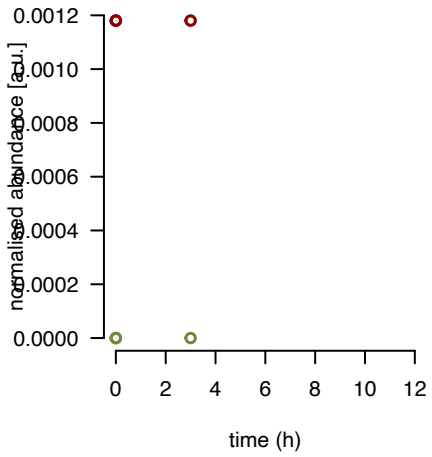**mL38 fraction 6**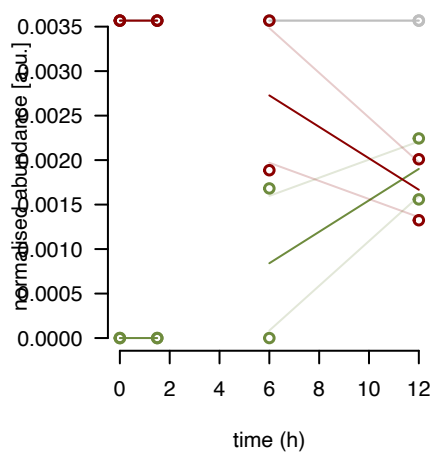**mL38 fraction 7**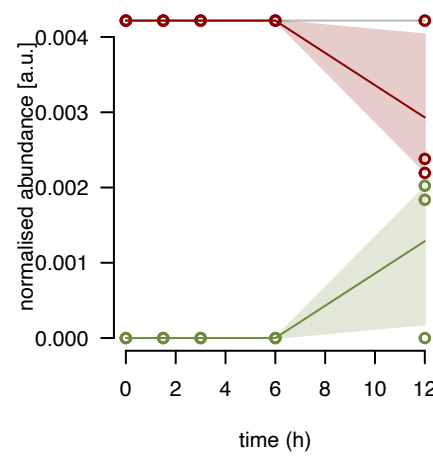**mL38 fraction 8**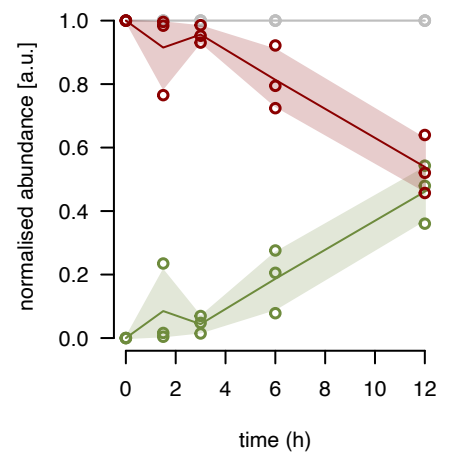**mL38 fraction 9**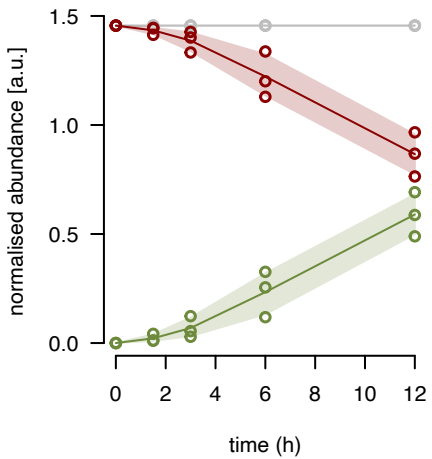**mL38 fraction 10**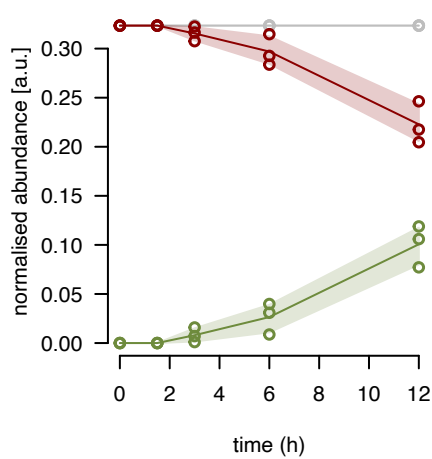**mL38 fraction 11**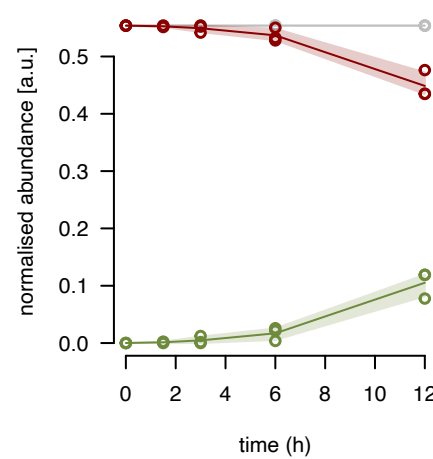**mL38 fraction 12**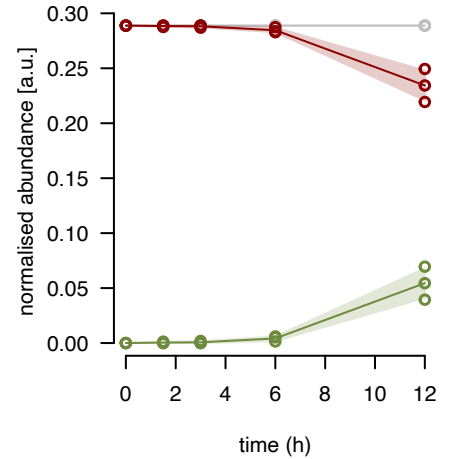**mL38 fraction 13**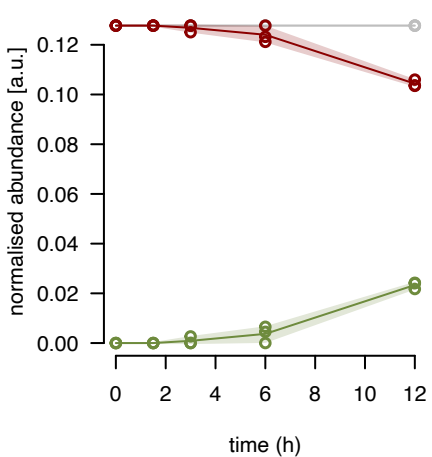**mL38 fraction 14**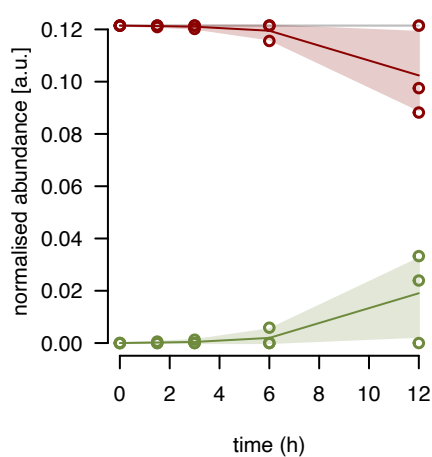**mL38 fraction 15**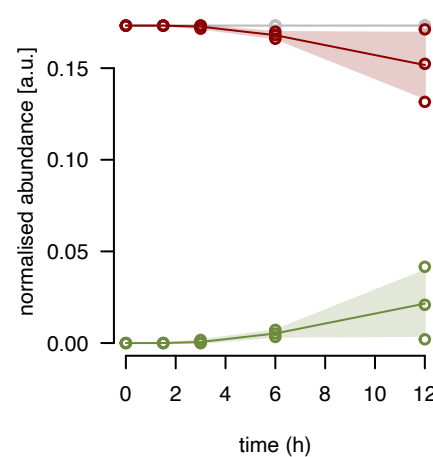**mL38 fraction 16**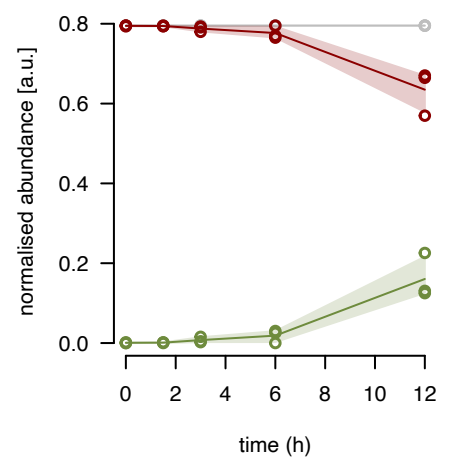



**mL39 fraction 1**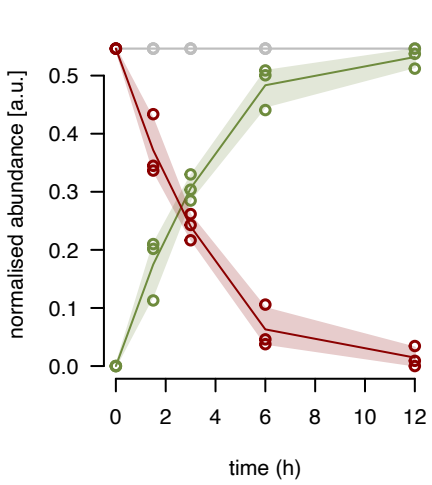**mL39 fraction 2**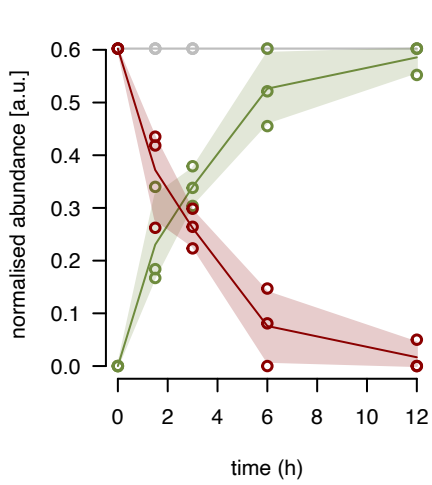**mL39 fraction 3**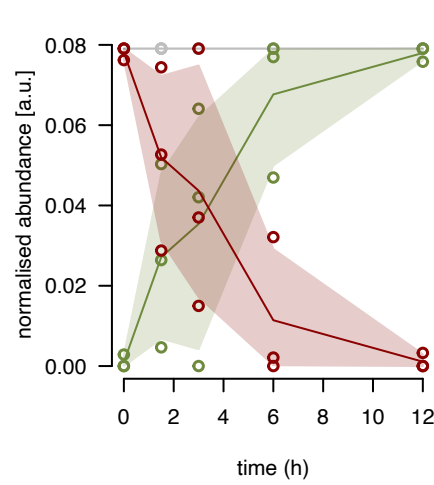**mL39 fraction 4**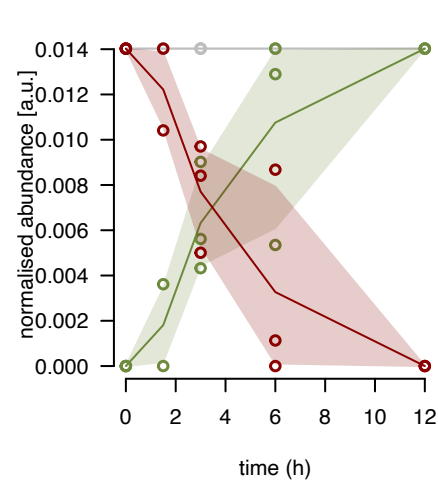**mL39 fraction 5**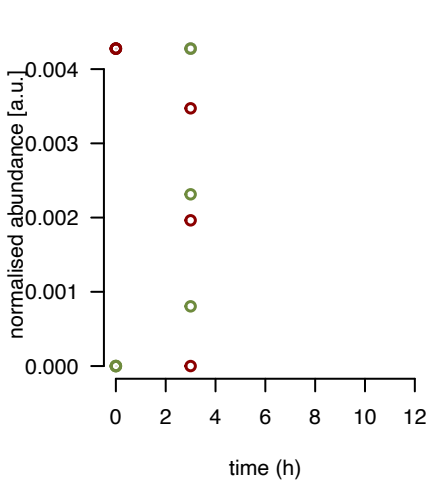**mL39 fraction 6**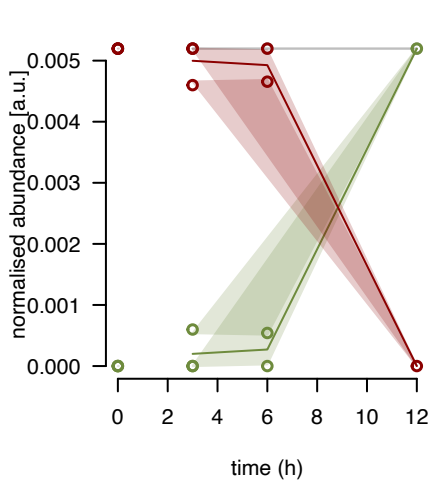**mL39 fraction 7**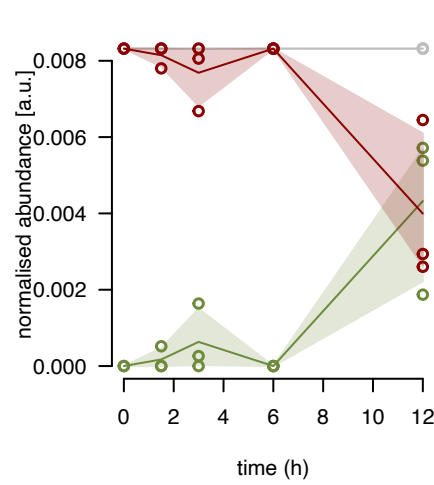**mL39 fraction 8**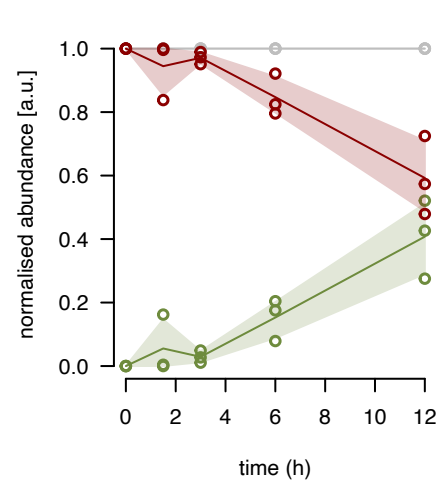**mL39 fraction 9**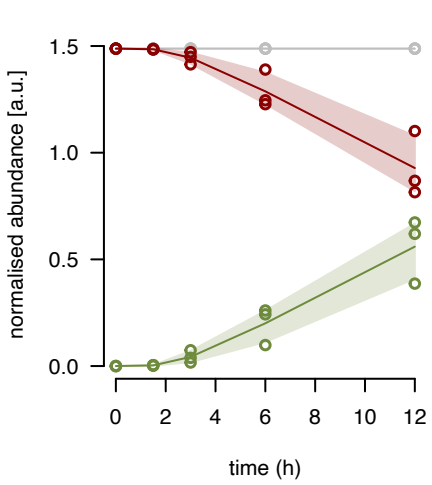**mL39 fraction 10**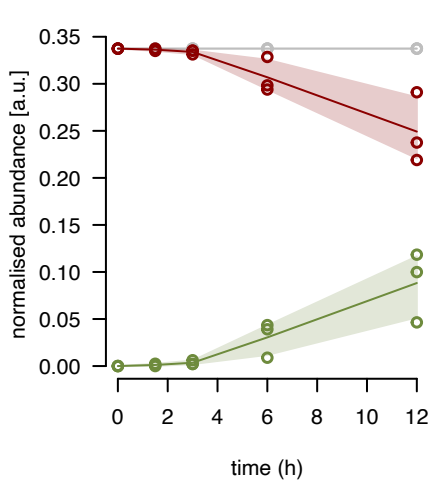**mL39 fraction 11**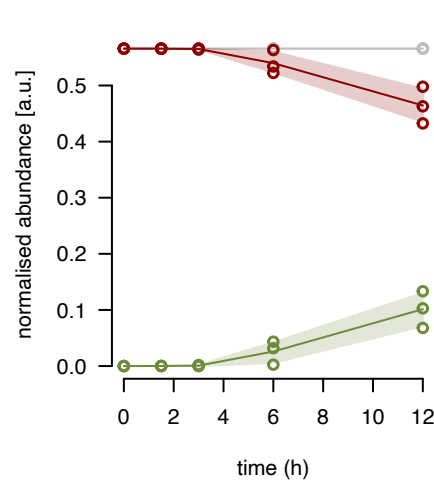**mL39 fraction 12**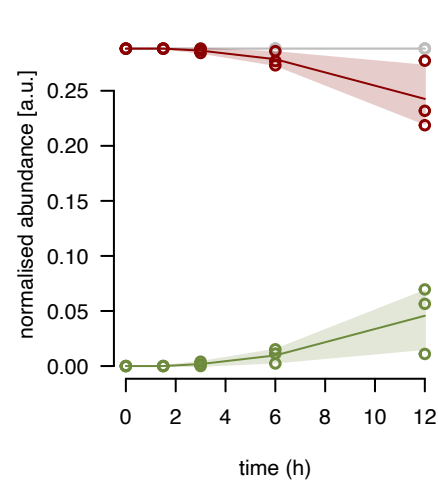**mL39 fraction 13**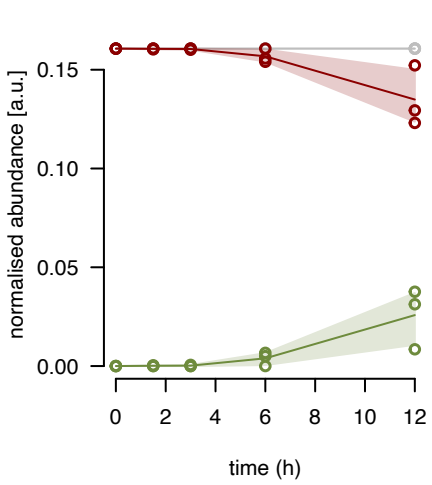**mL39 fraction 14**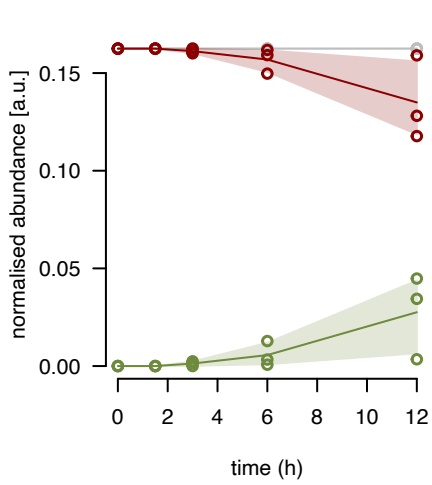**mL39 fraction 15**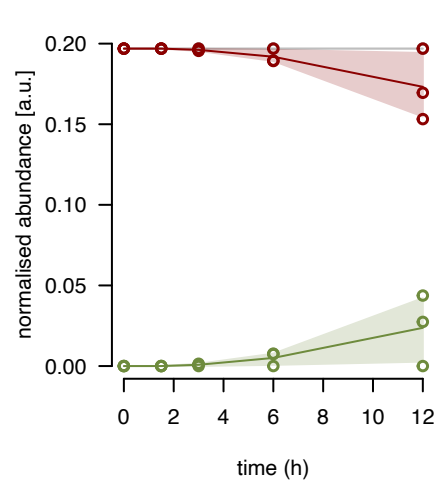**mL39 fraction 16**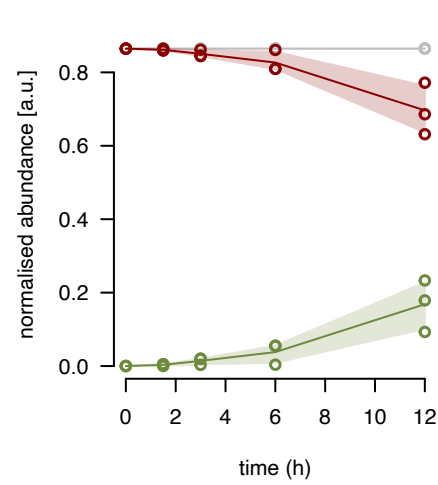

**mL40 fraction 1**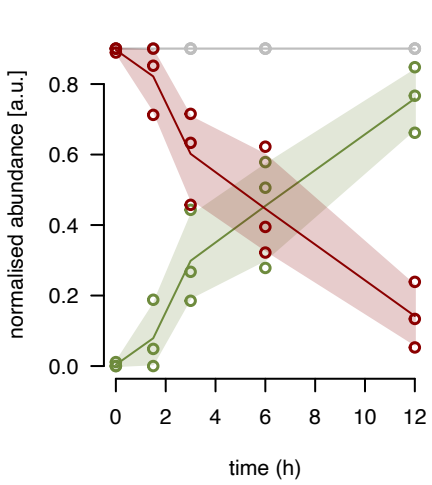**mL40 fraction 2**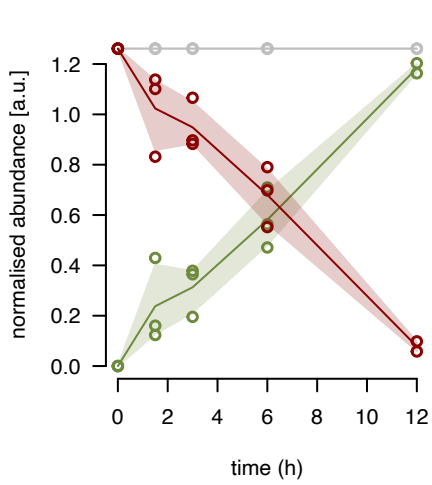**mL40 fraction 3**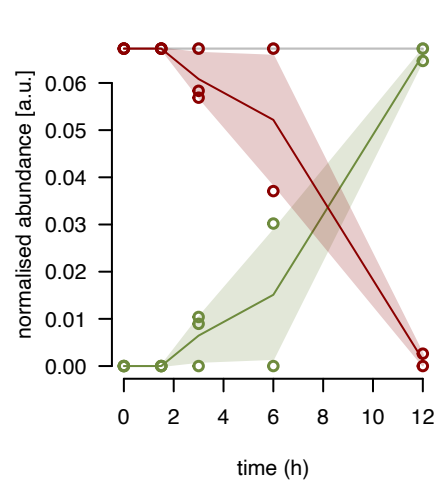**mL40 fraction 4**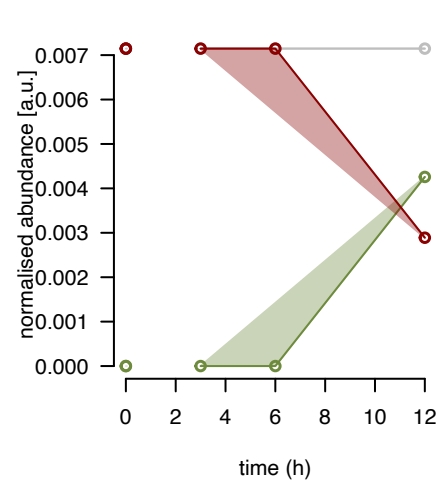**mL40 fraction 5**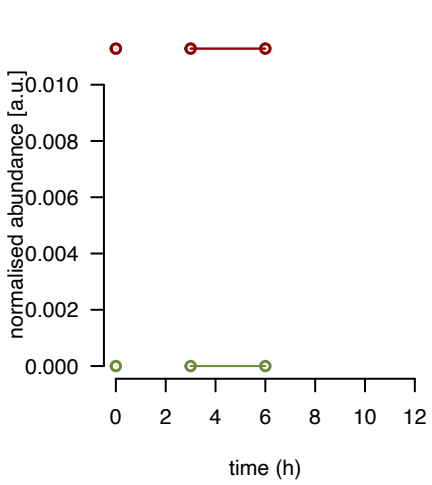**mL40 fraction 6**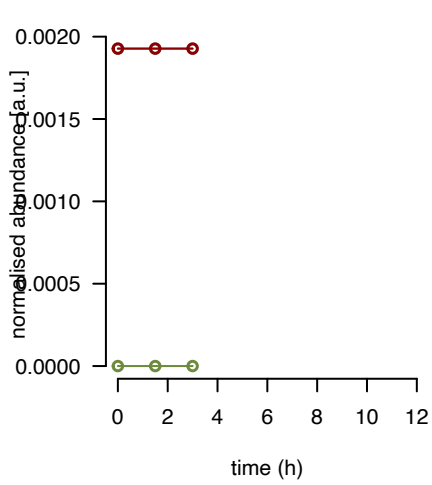**mL40 fraction 7**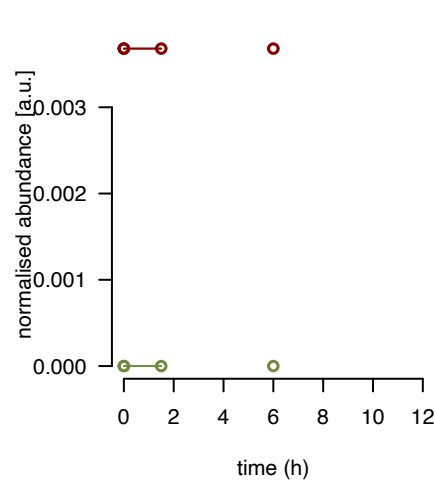**mL40 fraction 8**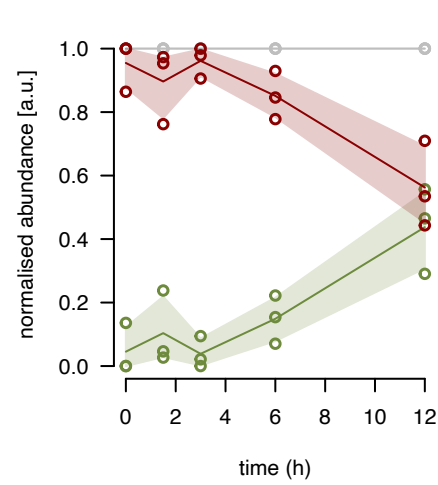**mL40 fraction 9**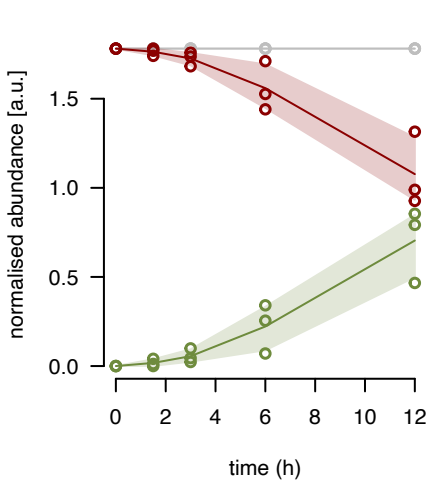**mL40 fraction 10**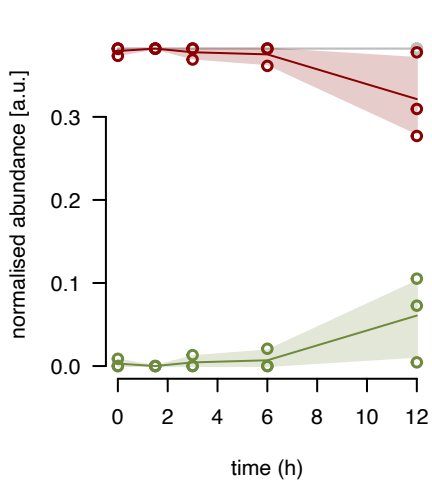**mL40 fraction 11**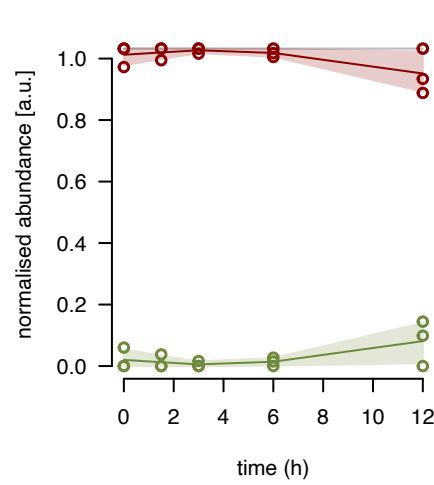**mL40 fraction 12**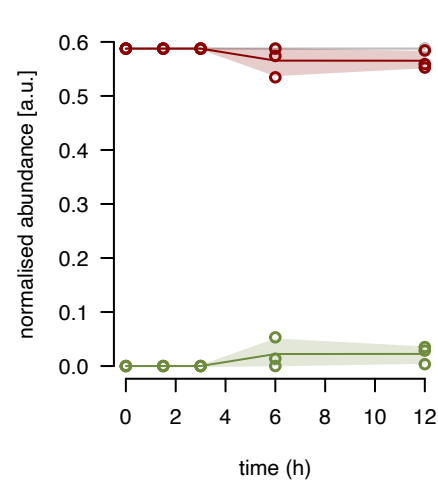**mL40 fraction 13**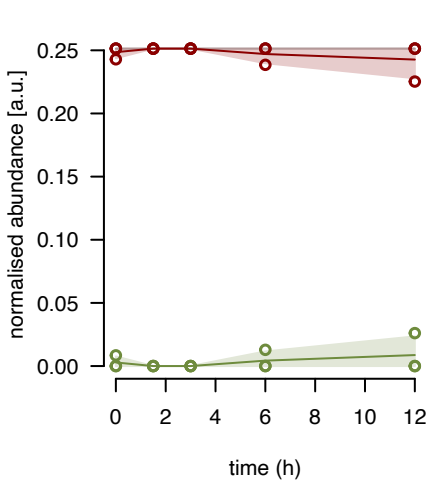**mL40 fraction 14**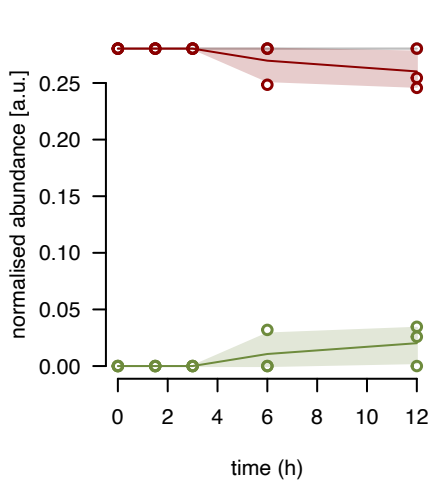**mL40 fraction 15**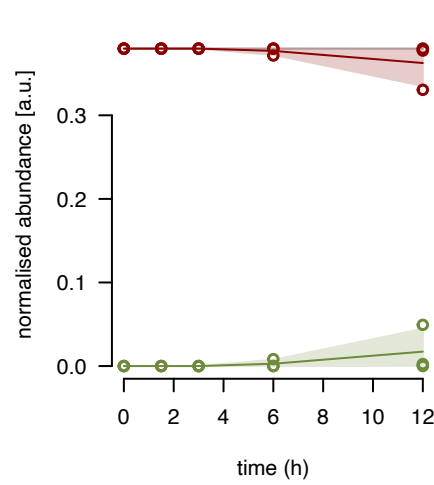**mL40 fraction 16**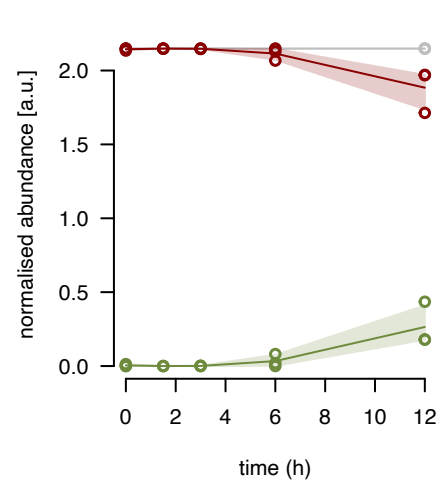

**mL41 fraction 1**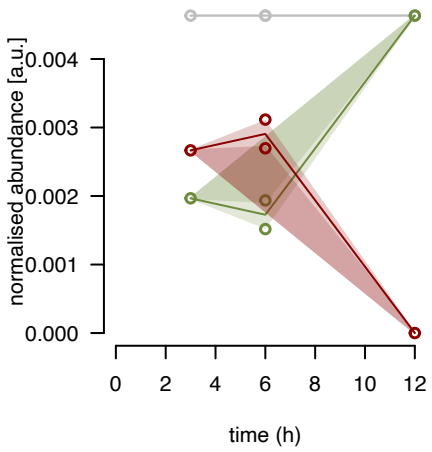**mL41 fraction 2**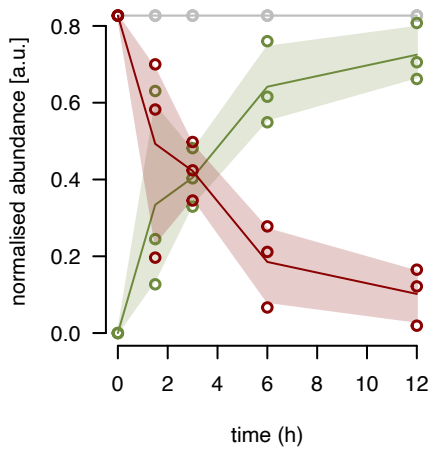**mL41 fraction 3**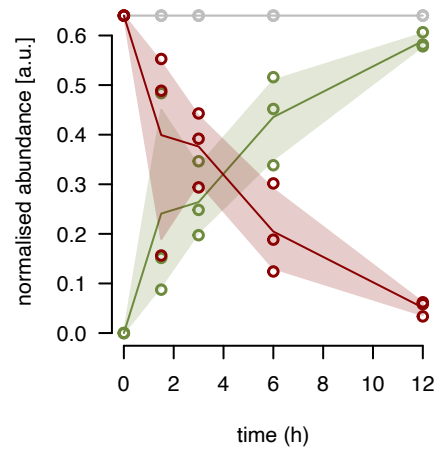**mL41 fraction 4**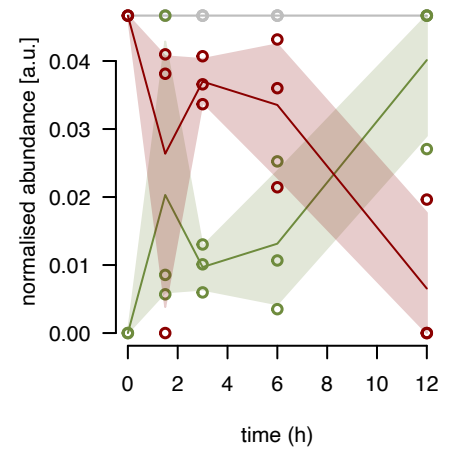**mL41 fraction 5**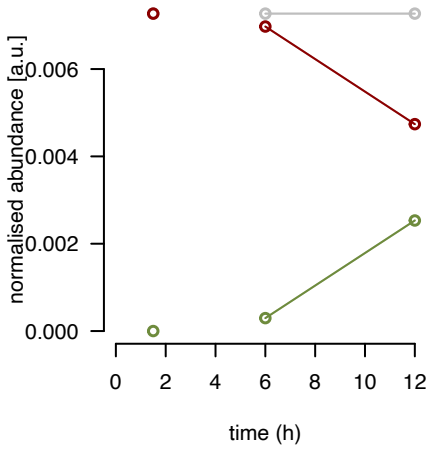**mL41 fraction 6**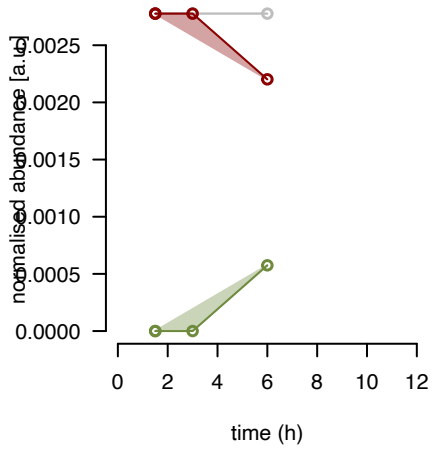**mL41 fraction 7**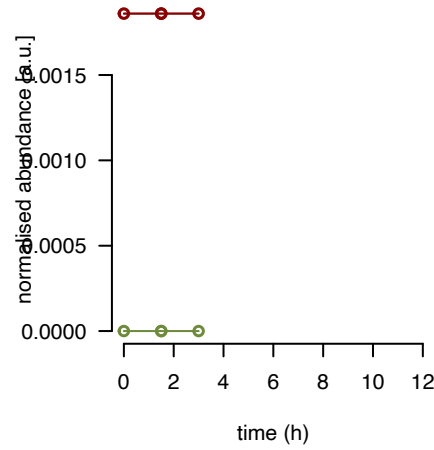**mL41 fraction 8**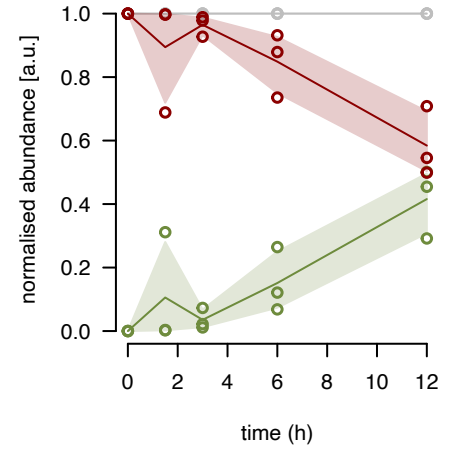**mL41 fraction 9**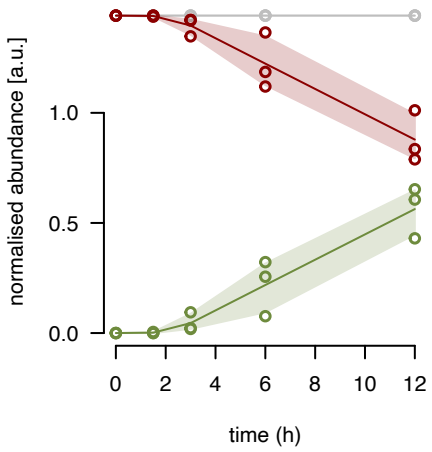**mL41 fraction 10**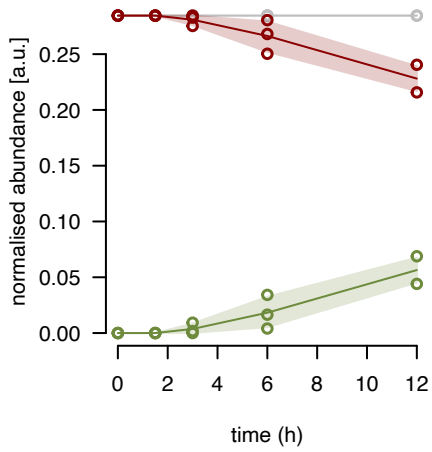**mL41 fraction 11**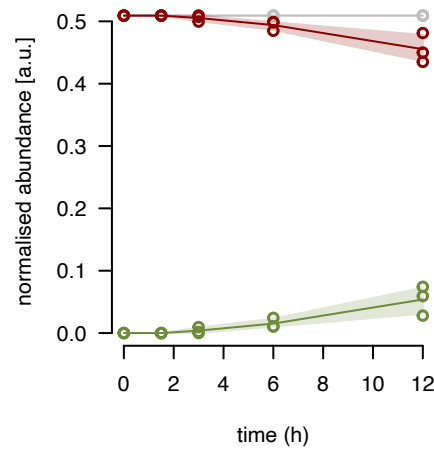**mL41 fraction 12**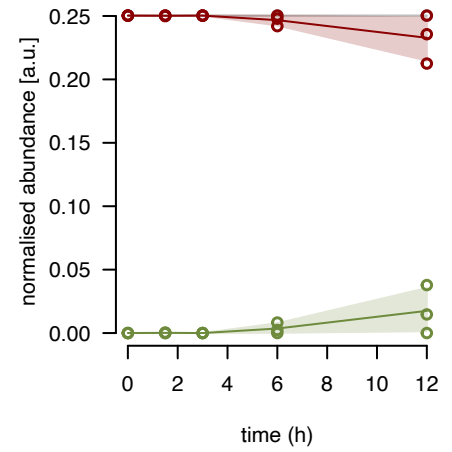**mL41 fraction 13**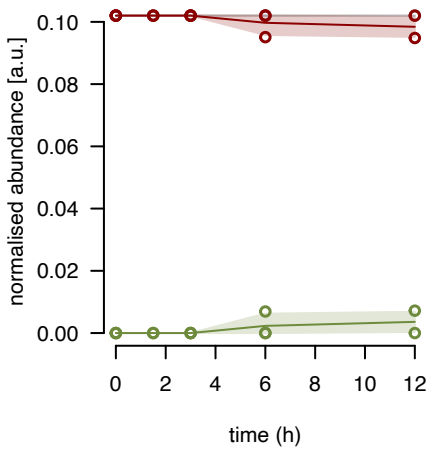**mL41 fraction 14**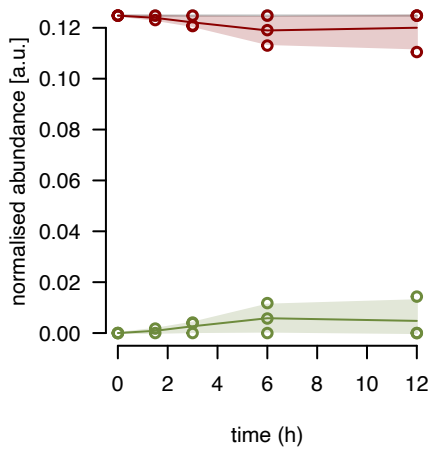**mL41 fraction 15**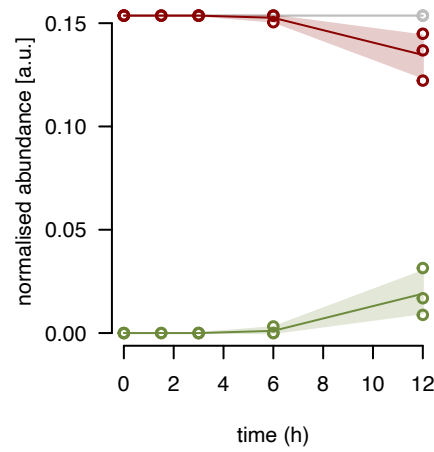**mL41 fraction 16**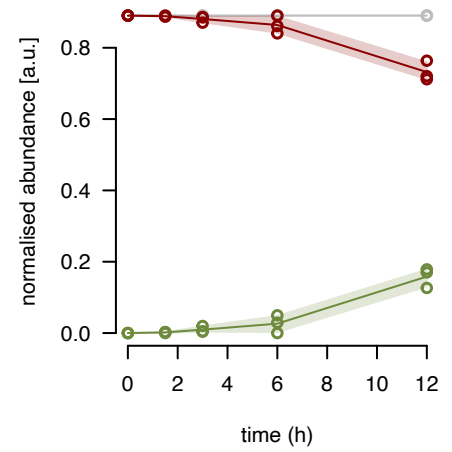

**mL42 fraction 1****mL42 fraction 2**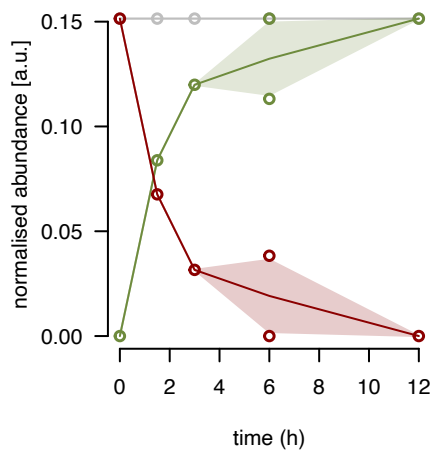**mL42 fraction 3**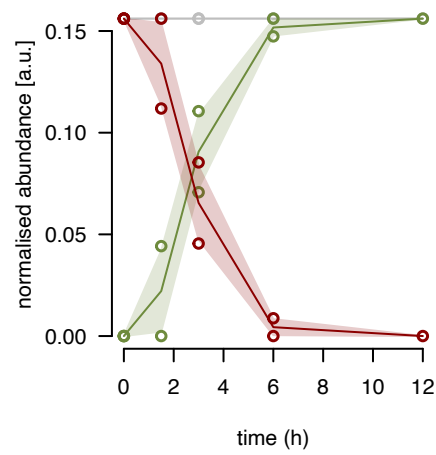**mL42 fraction 4**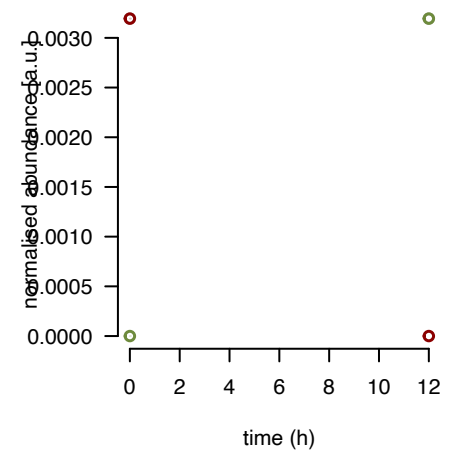**mL42 fraction 5****mL42 fraction 6****mL42 fraction 7****mL42 fraction 8**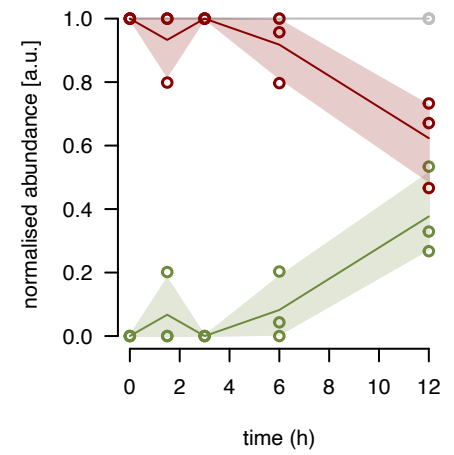**mL42 fraction 9**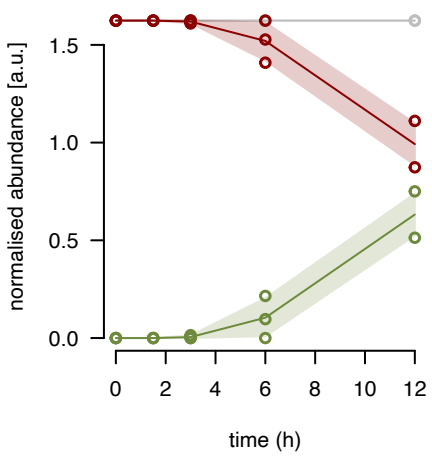**mL42 fraction 10**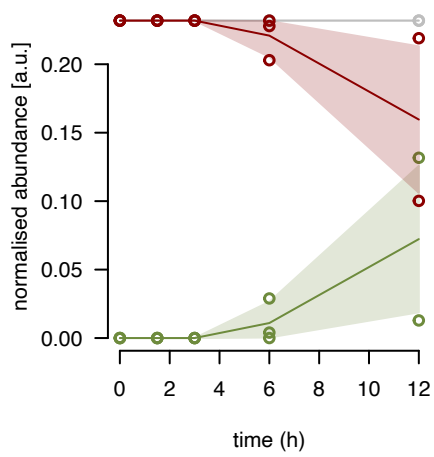**mL42 fraction 11**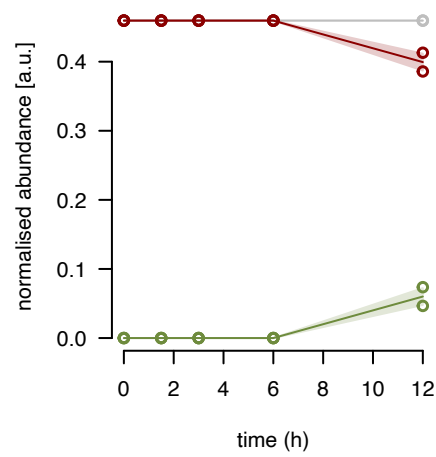**mL42 fraction 12**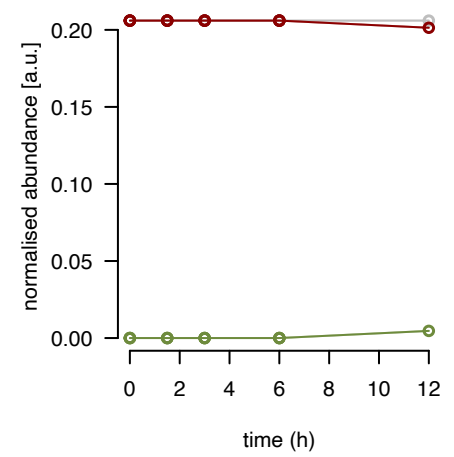**mL42 fraction 13**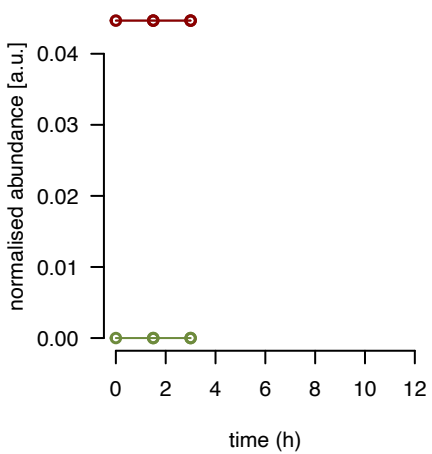**mL42 fraction 14**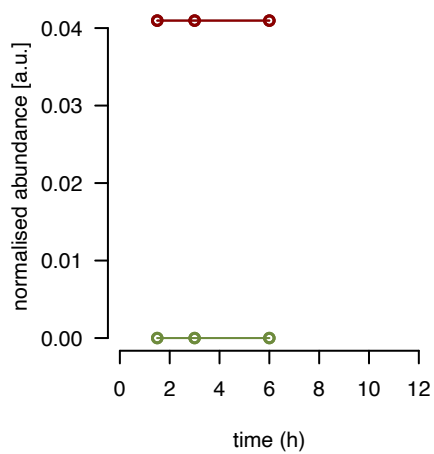**mL42 fraction 15**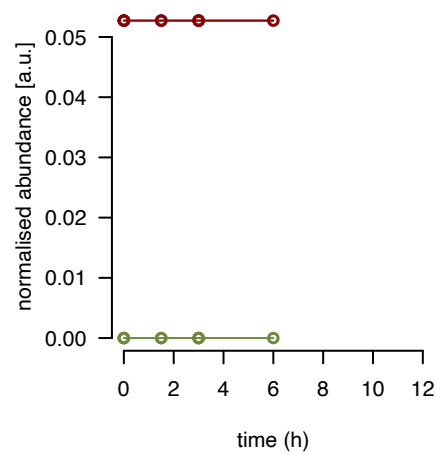**mL42 fraction 16**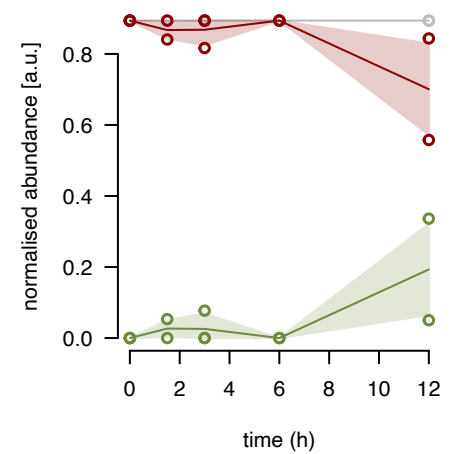

**mL43 fraction 1**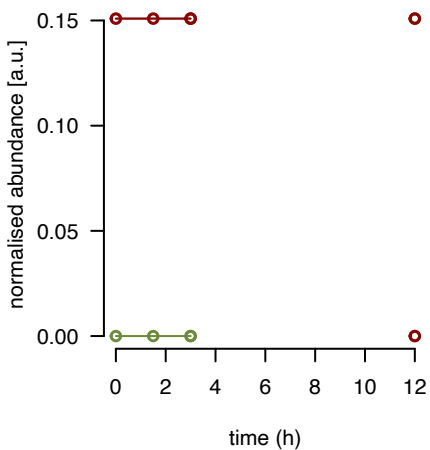**mL43 fraction 2**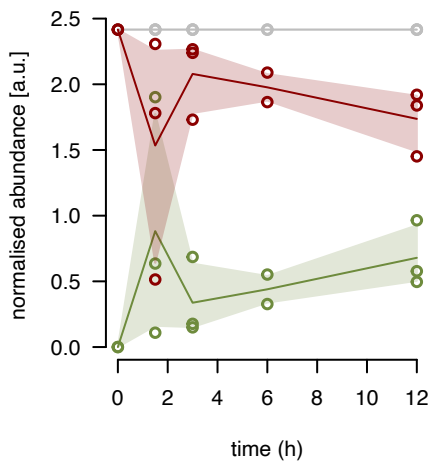**mL43 fraction 3**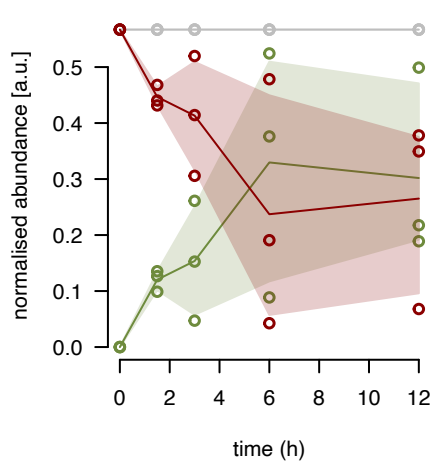**mL43 fraction 4**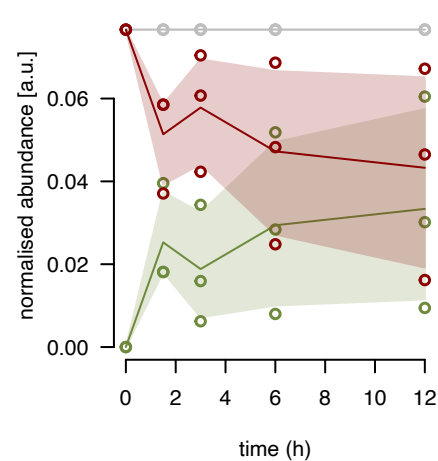**mL43 fraction 5**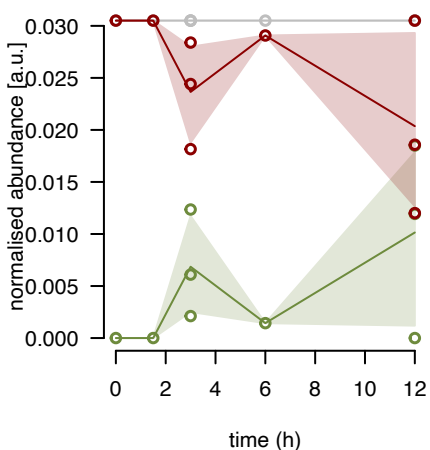**mL43 fraction 6**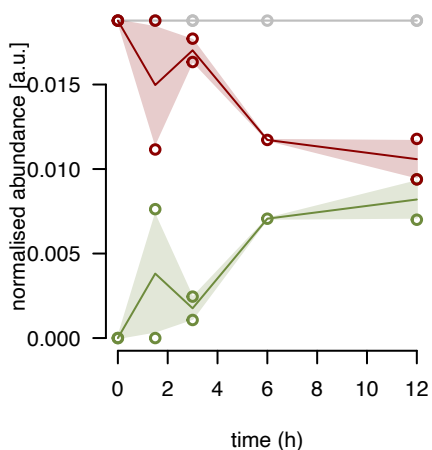**mL43 fraction 7**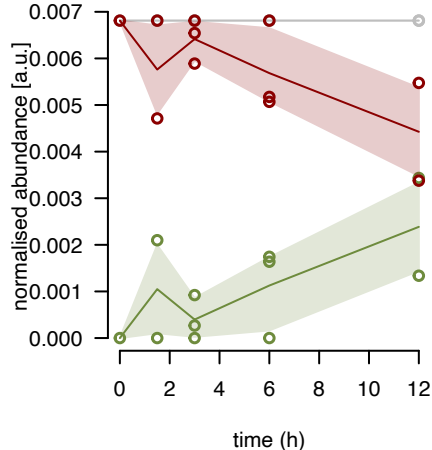**mL43 fraction 8**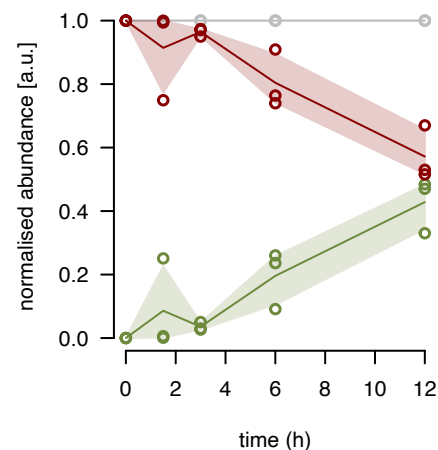**mL43 fraction 9**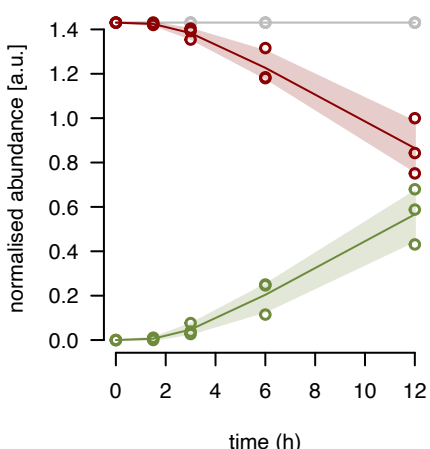**mL43 fraction 10**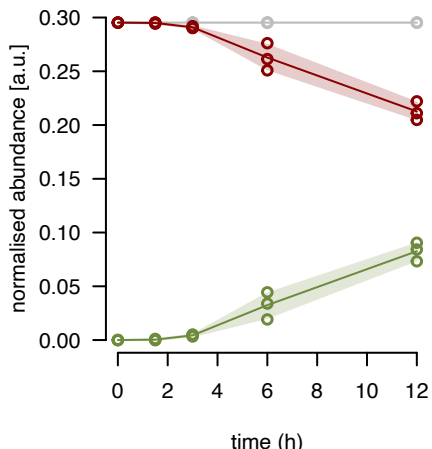**mL43 fraction 11**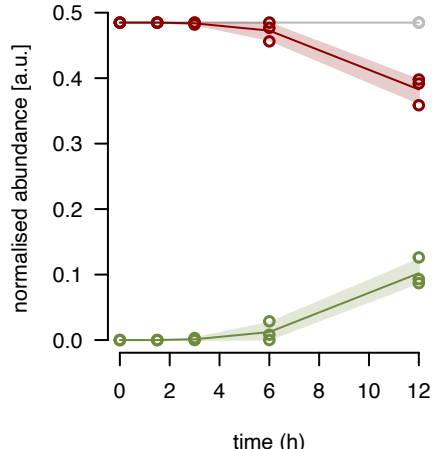**mL43 fraction 12**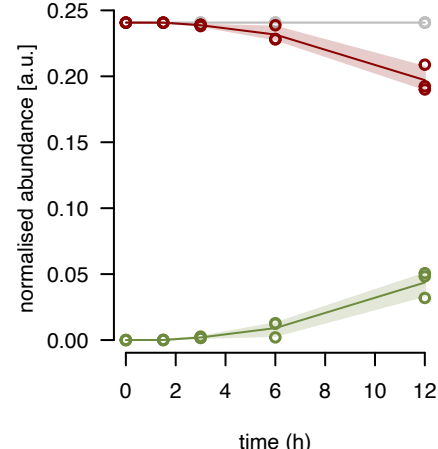**mL43 fraction 13**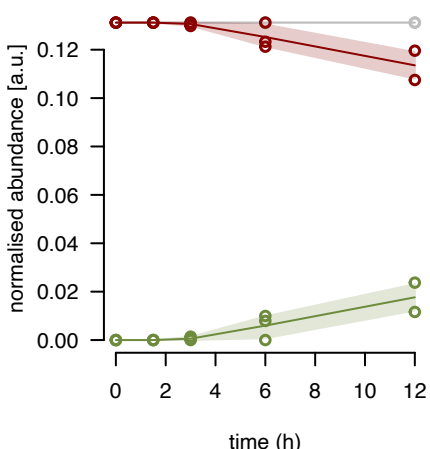**mL43 fraction 14**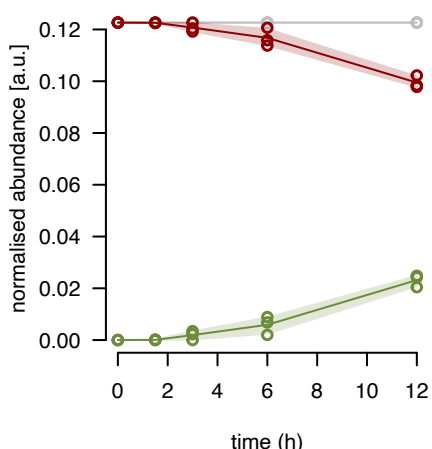**mL43 fraction 15**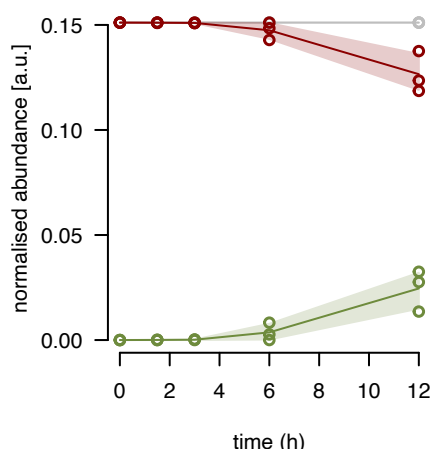**mL43 fraction 16**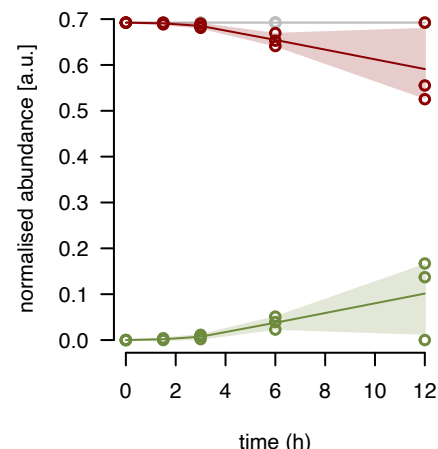

**mL44 fraction 1**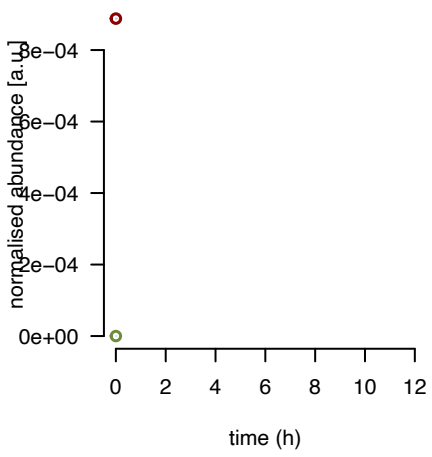**mL44 fraction 2**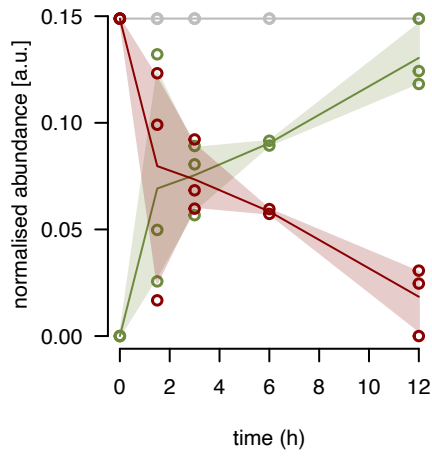**mL44 fraction 3**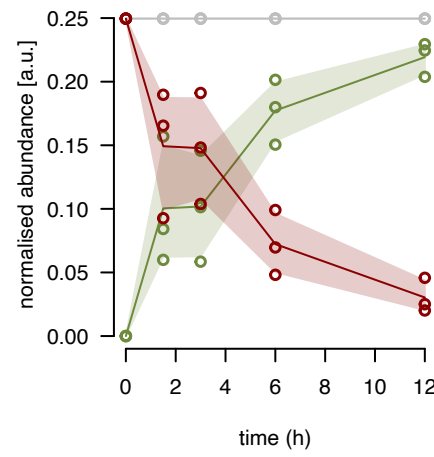**mL44 fraction 4**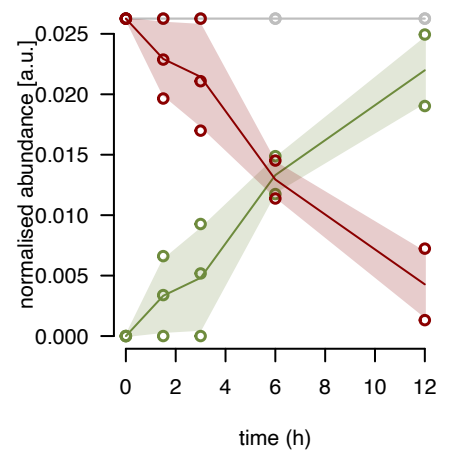**mL44 fraction 5**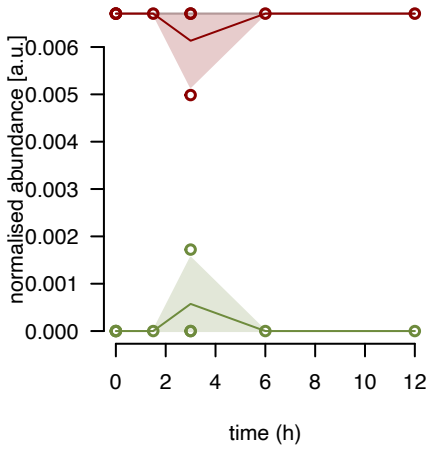**mL44 fraction 6**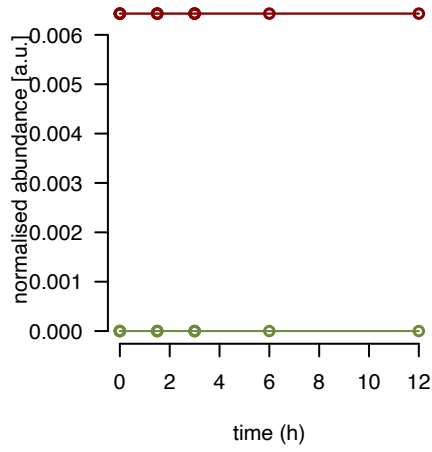**mL44 fraction 7**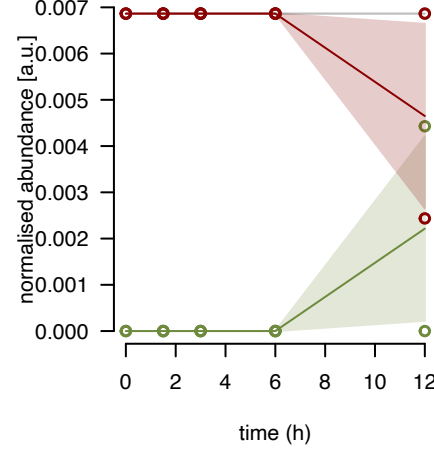**mL44 fraction 8**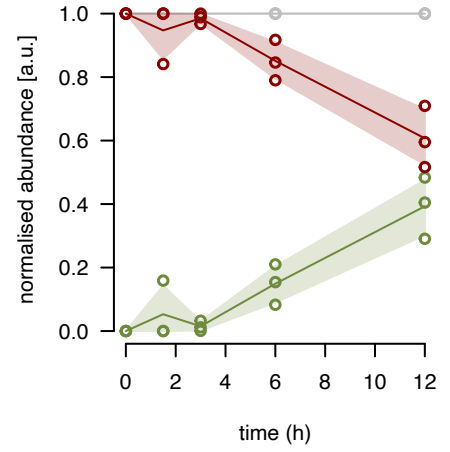**mL44 fraction 9**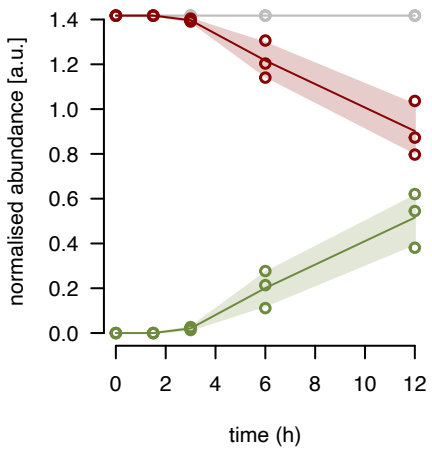**mL44 fraction 10**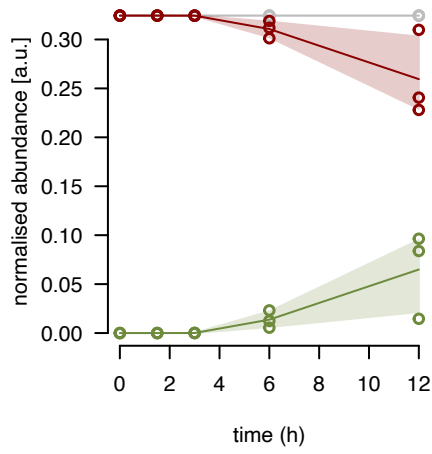**mL44 fraction 11**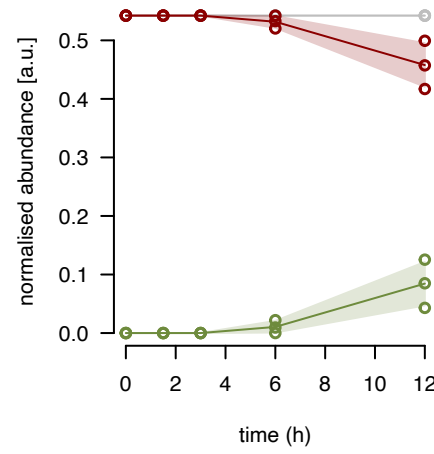**mL44 fraction 12**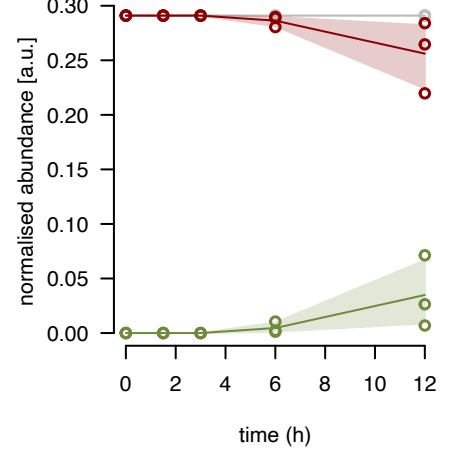**mL44 fraction 13**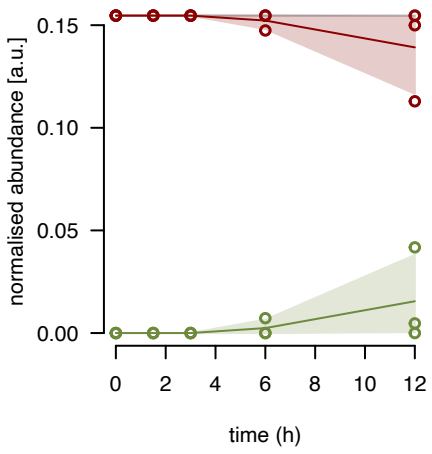**mL44 fraction 14**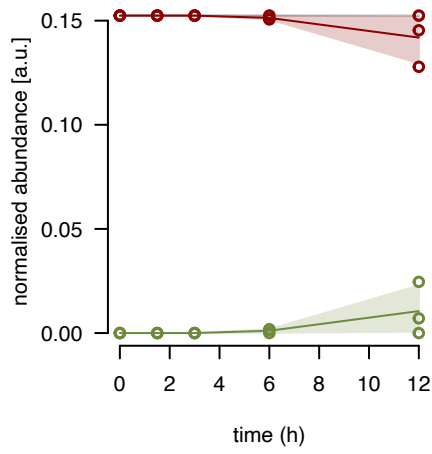**mL44 fraction 15**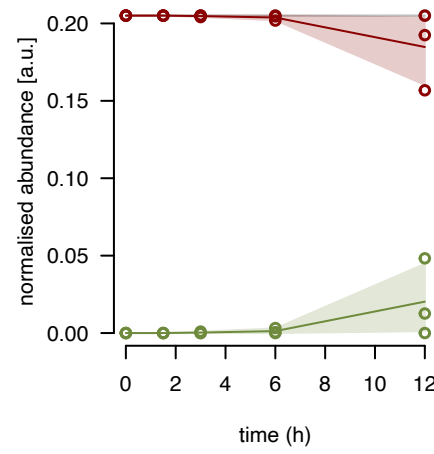**mL44 fraction 16**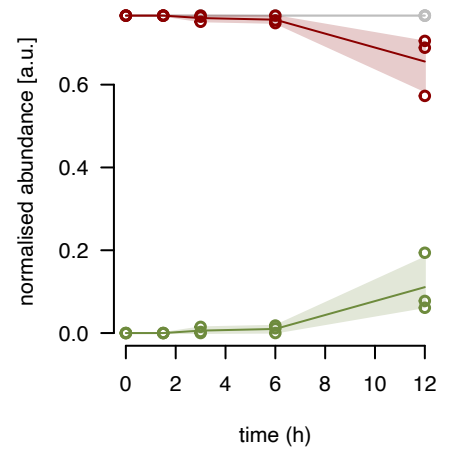

**mL45 fraction 1**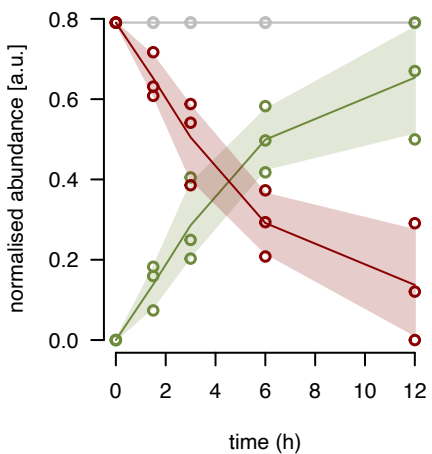**mL45 fraction 2**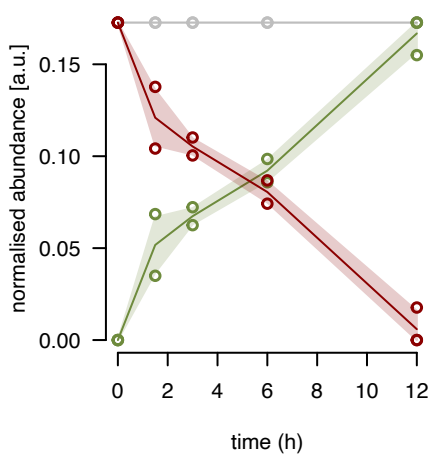**mL45 fraction 3**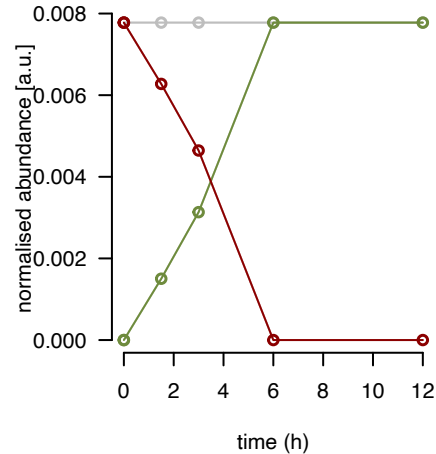**mL45 fraction 4**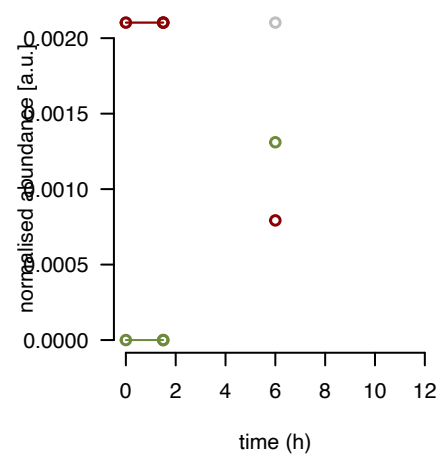**mL45 fraction 5**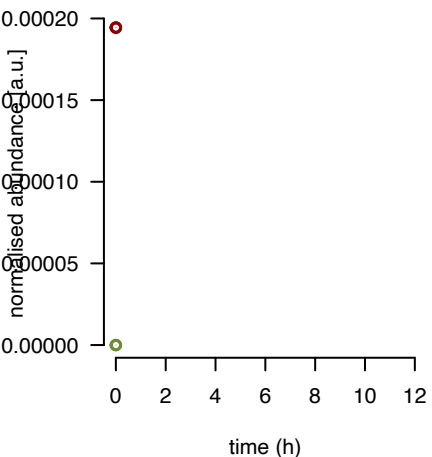**mL45 fraction 6**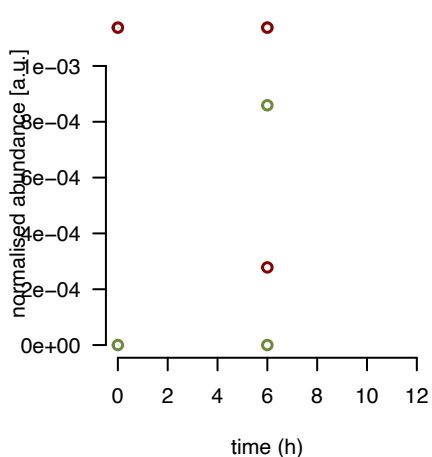**mL45 fraction 7**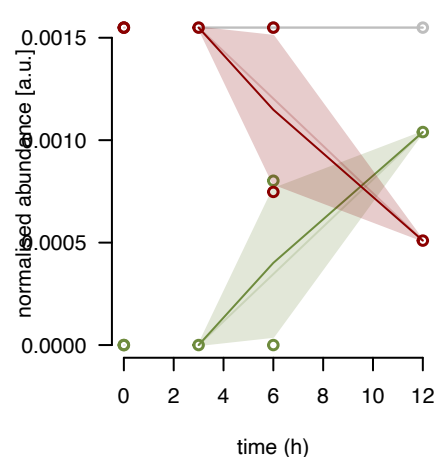**mL45 fraction 8**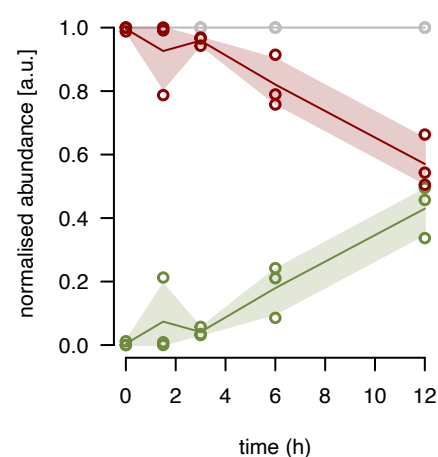**mL45 fraction 9**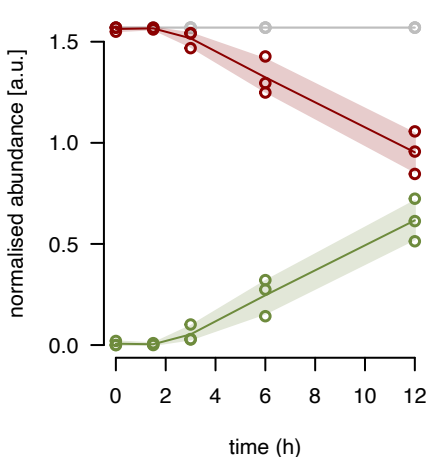**mL45 fraction 10**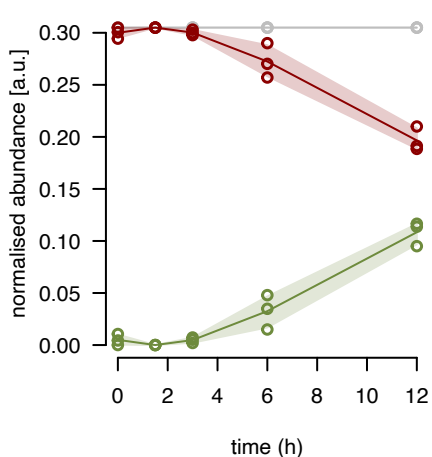**mL45 fraction 11**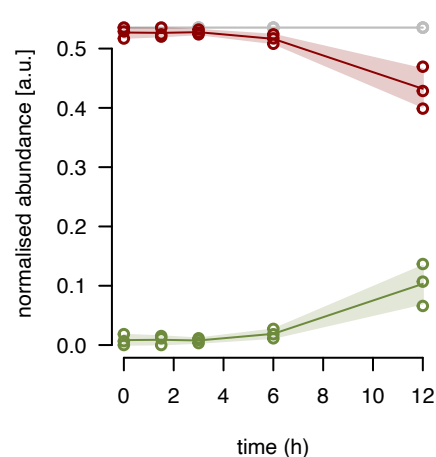**mL45 fraction 12**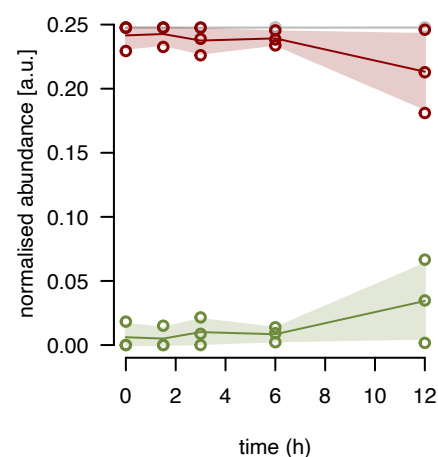**mL45 fraction 13**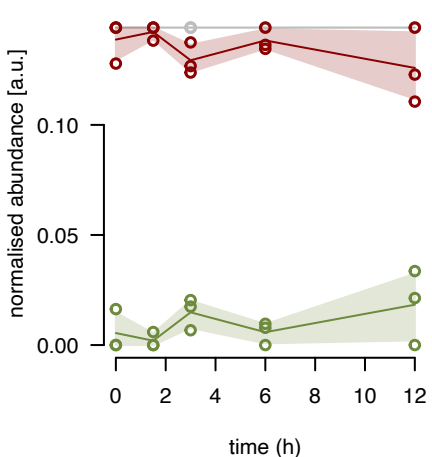**mL45 fraction 14**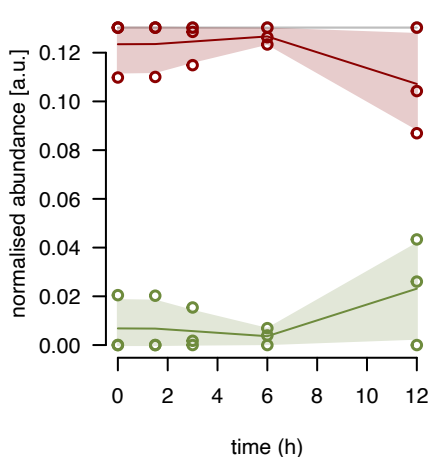**mL45 fraction 15**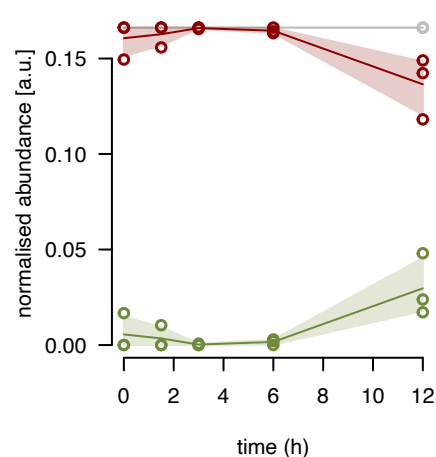**mL45 fraction 16**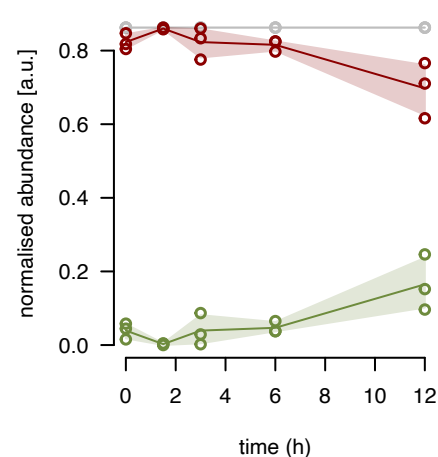

**mL46 fraction 1**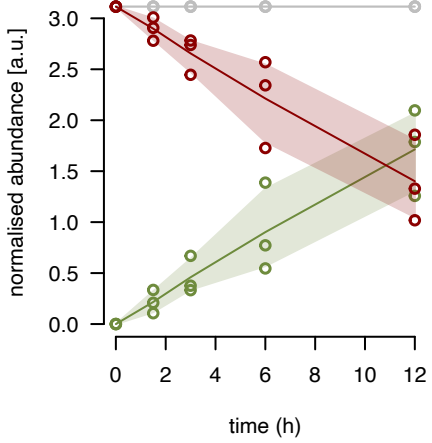**mL46 fraction 2**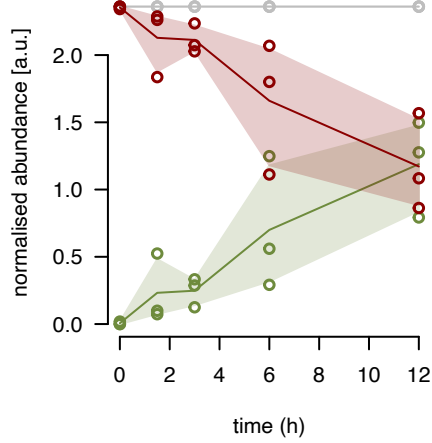**mL46 fraction 3**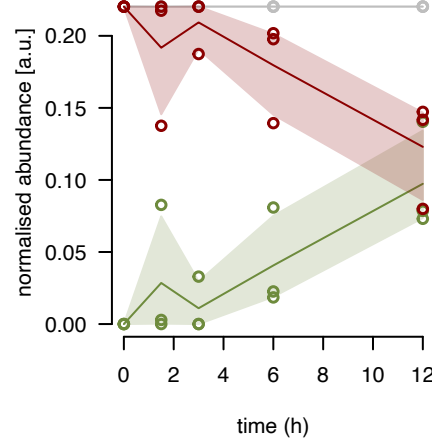**mL46 fraction 4**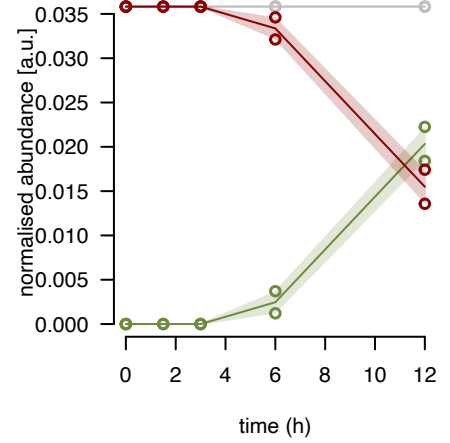**mL46 fraction 5**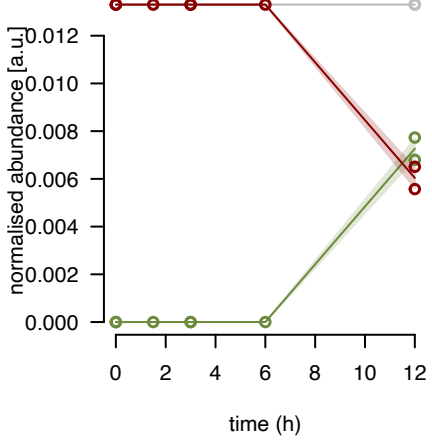**mL46 fraction 6**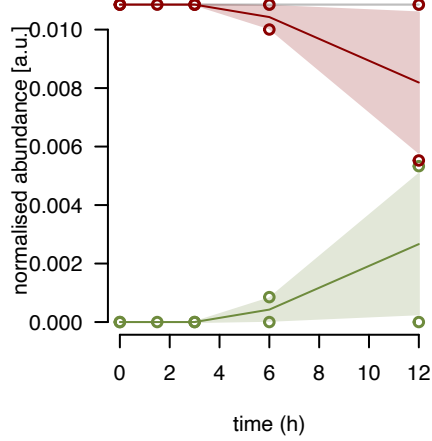**mL46 fraction 7**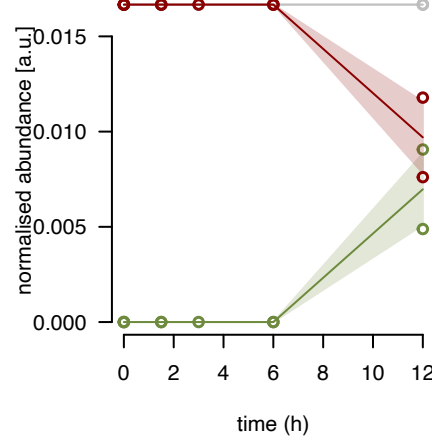**mL46 fraction 8**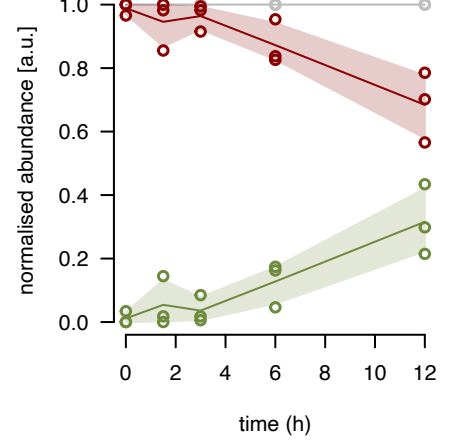**mL46 fraction 9**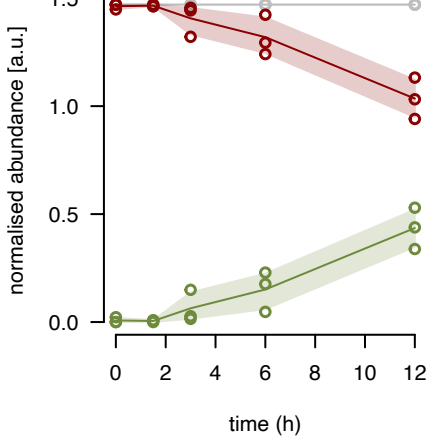**mL46 fraction 10**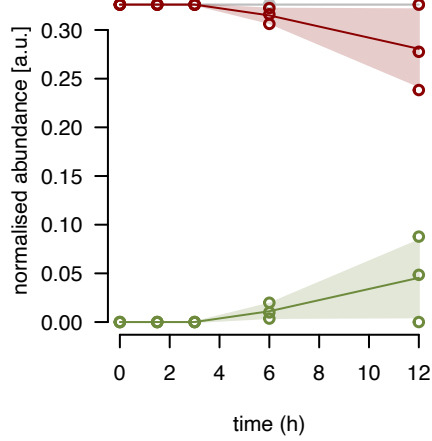**mL46 fraction 11**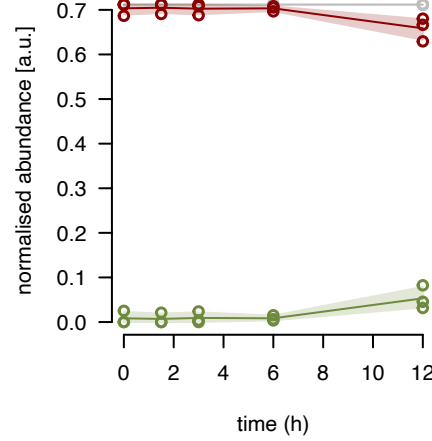**mL46 fraction 12**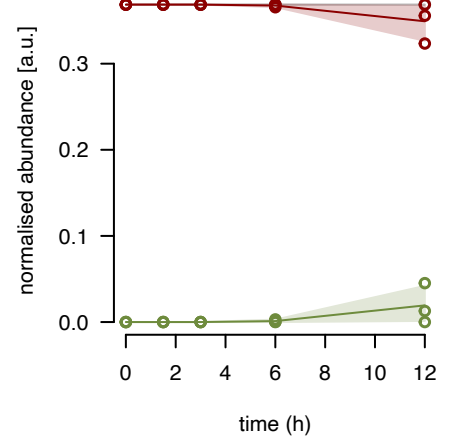**mL46 fraction 13**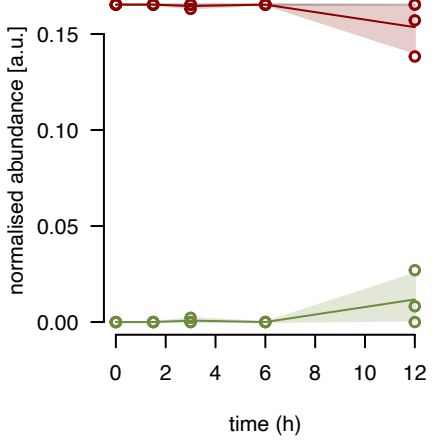**mL46 fraction 14**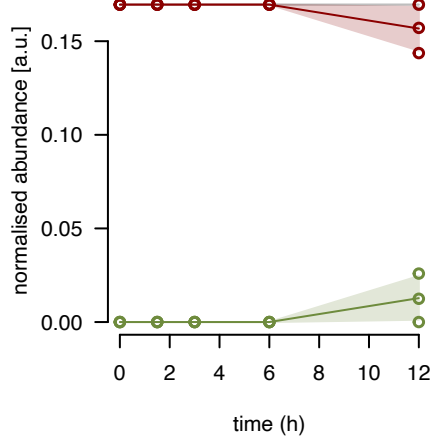**mL46 fraction 15**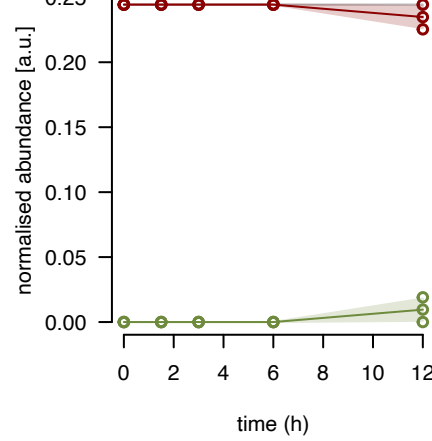**mL46 fraction 16**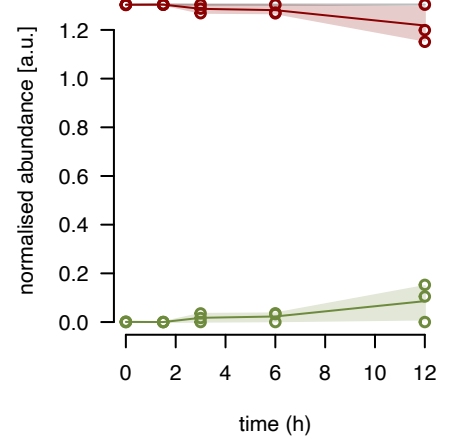



**mL48 fraction 1**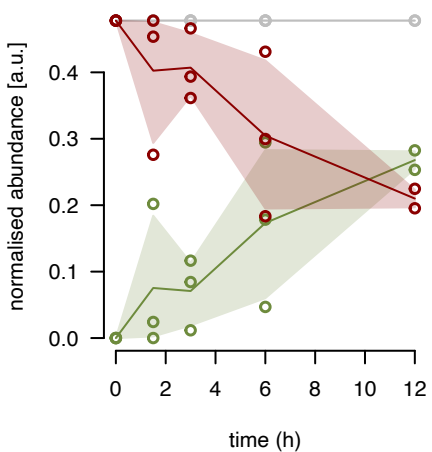**mL48 fraction 2**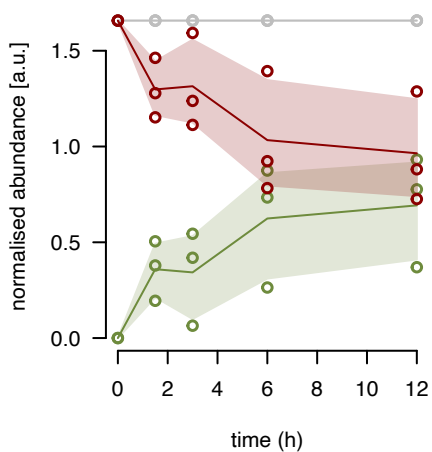**mL48 fraction 3**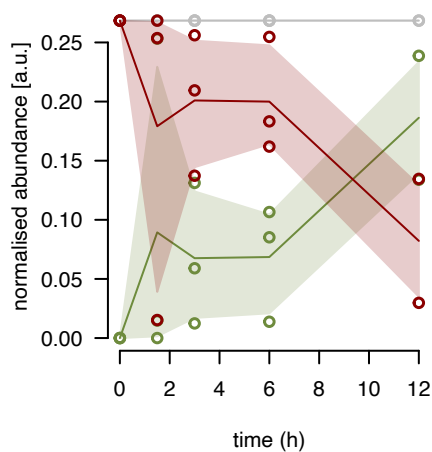**mL48 fraction 4**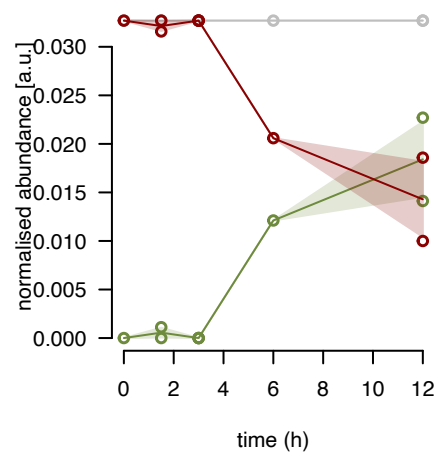**mL48 fraction 5**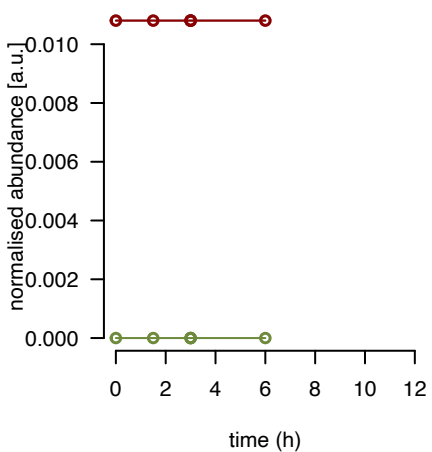**mL48 fraction 6**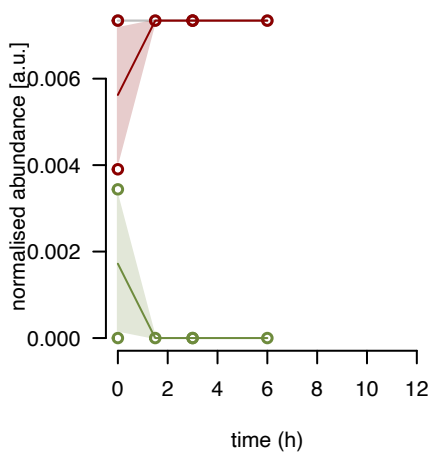**mL48 fraction 7**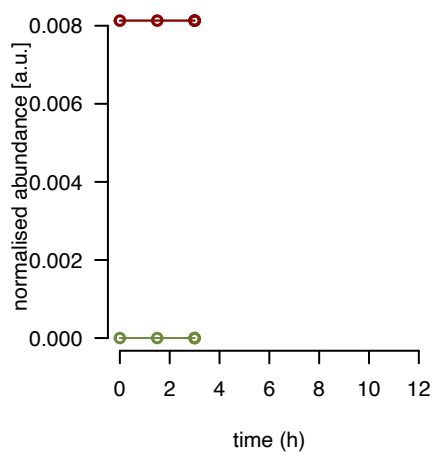**mL48 fraction 8**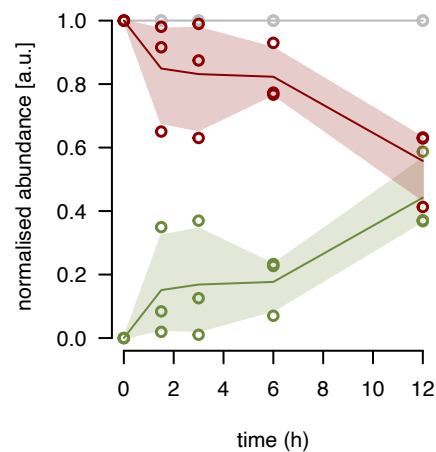**mL48 fraction 9**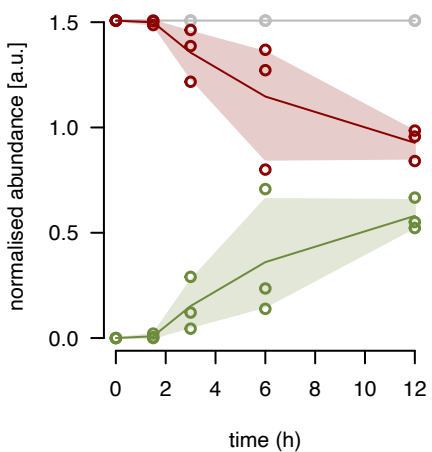**mL48 fraction 10**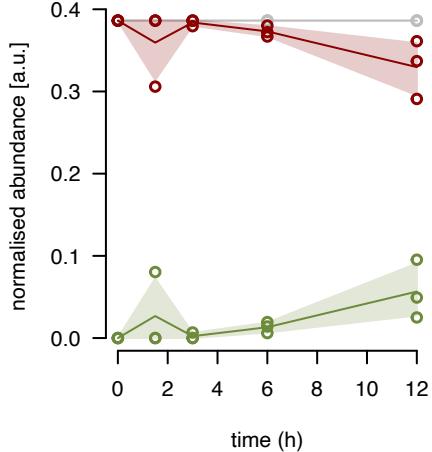**mL48 fraction 11**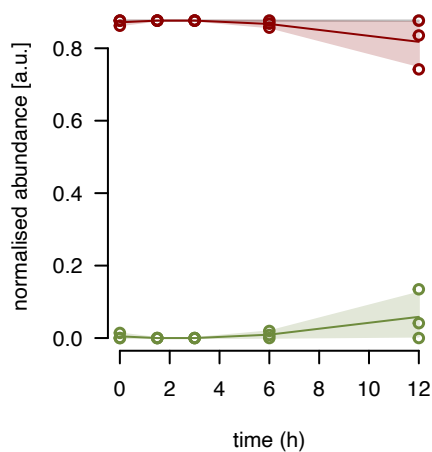**mL48 fraction 12**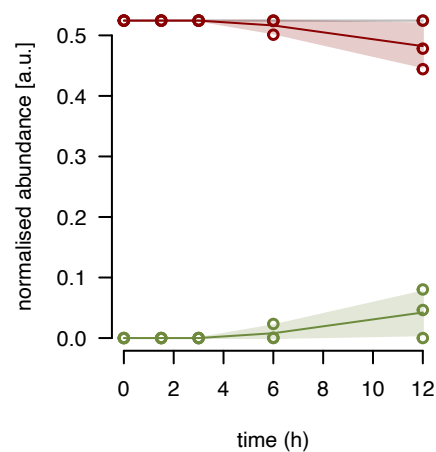**mL48 fraction 13**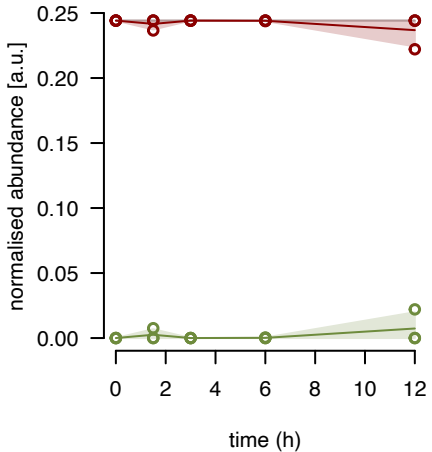**mL48 fraction 14**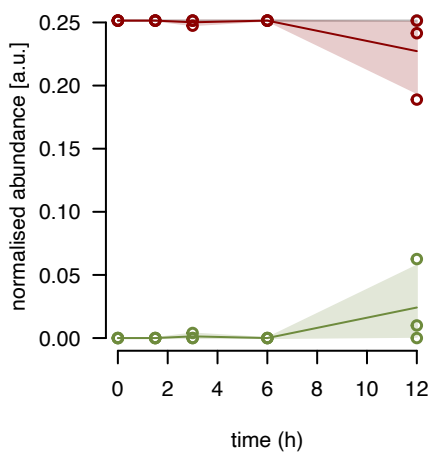**mL48 fraction 15**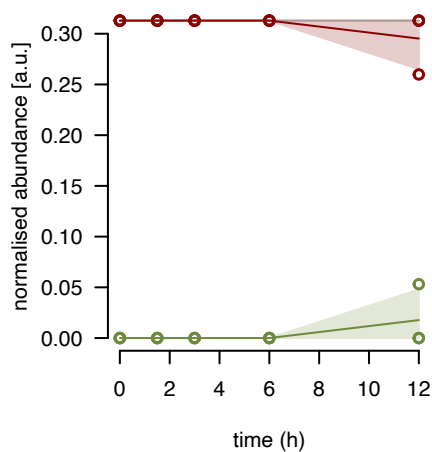**mL48 fraction 16**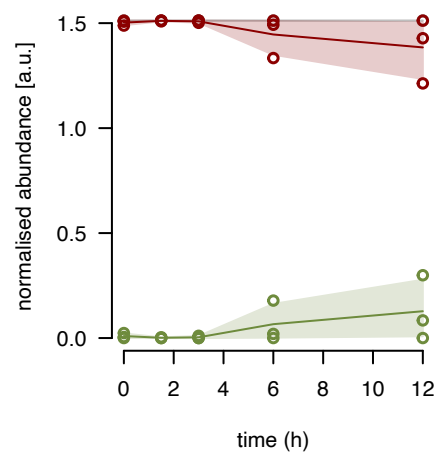

**mL49 fraction 1**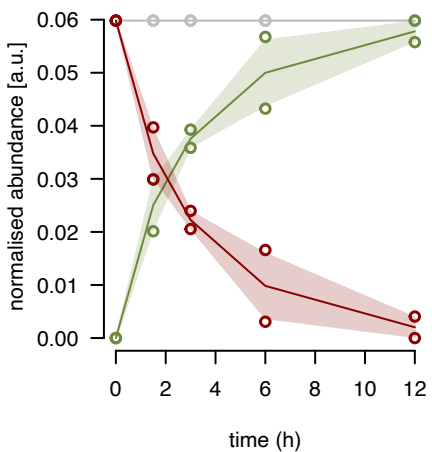**mL49 fraction 2**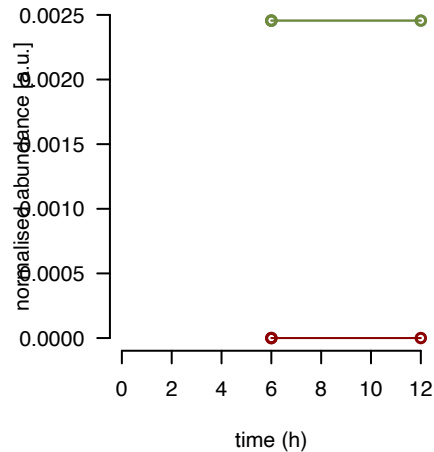**mL49 fraction 3**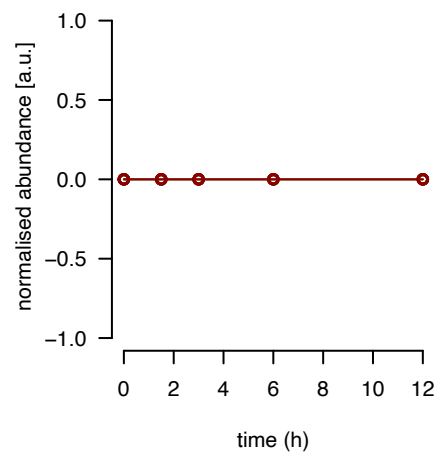**mL49 fraction 4**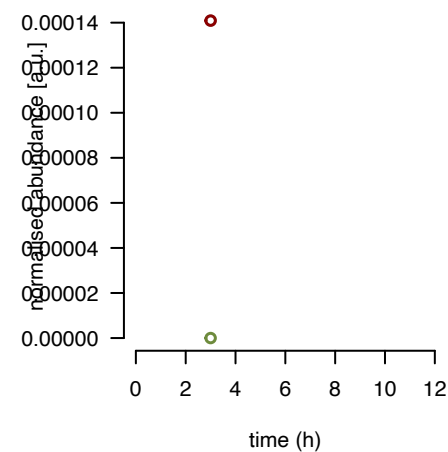**mL49 fraction 5**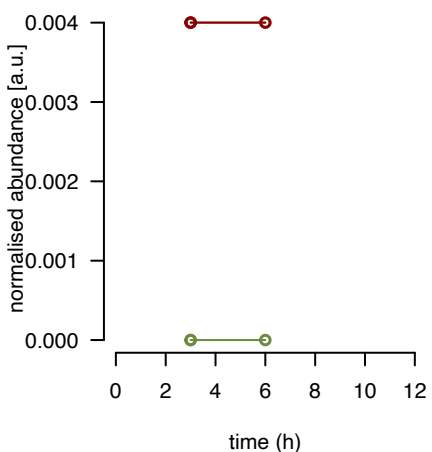**mL49 fraction 6**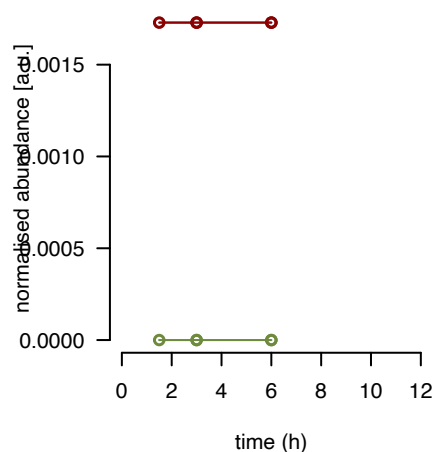**mL49 fraction 7**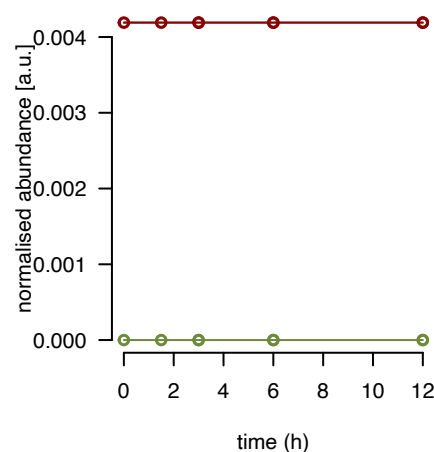**mL49 fraction 8**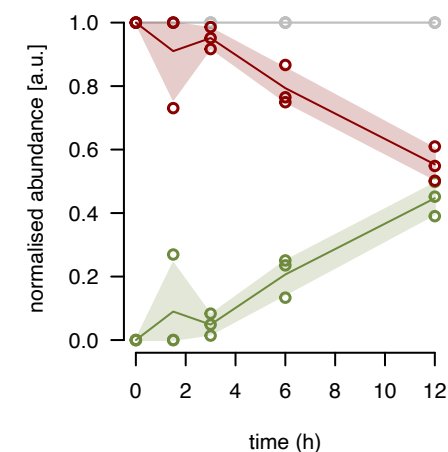**mL49 fraction 9**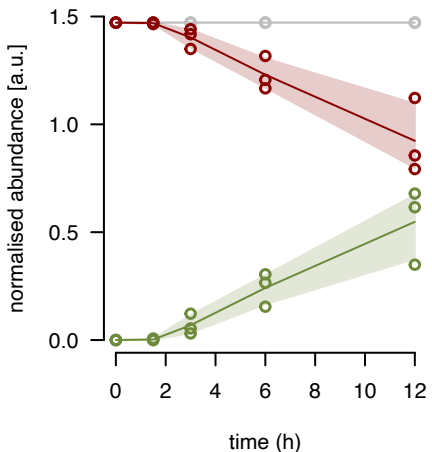**mL49 fraction 10**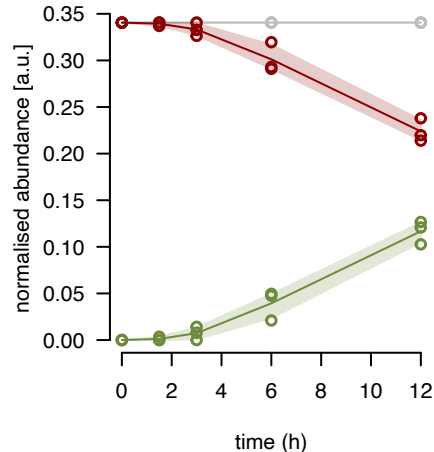**mL49 fraction 11**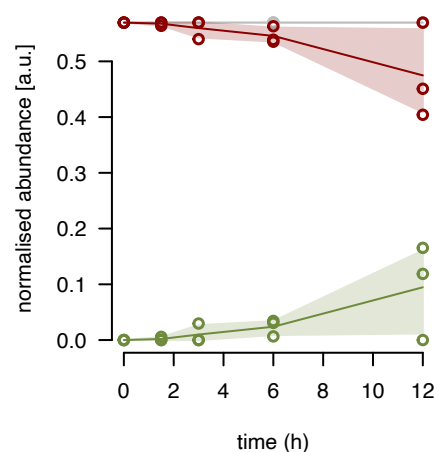**mL49 fraction 12**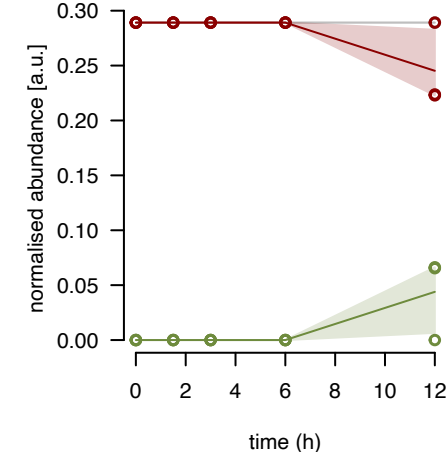**mL49 fraction 13**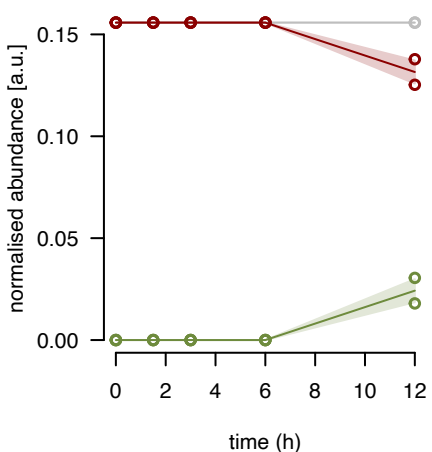**mL49 fraction 14**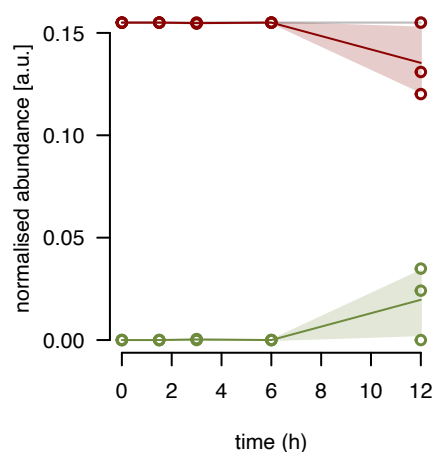**mL49 fraction 15**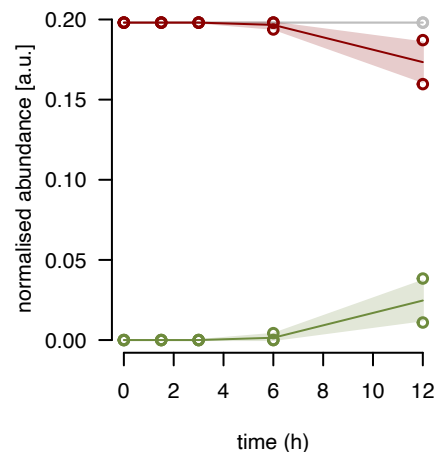**mL49 fraction 16**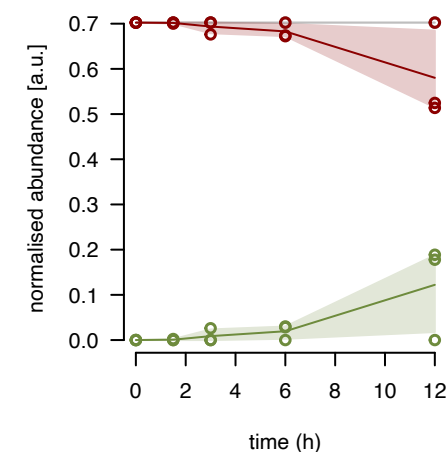

**mL50 fraction 1**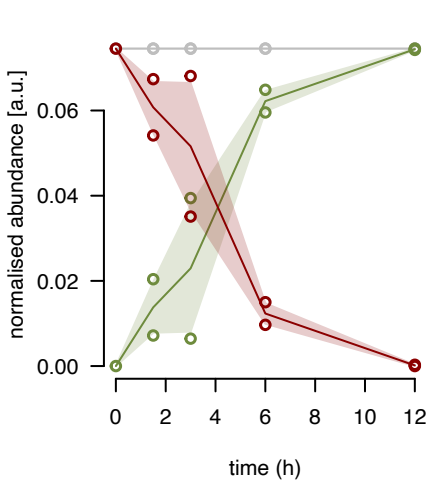**mL50 fraction 2**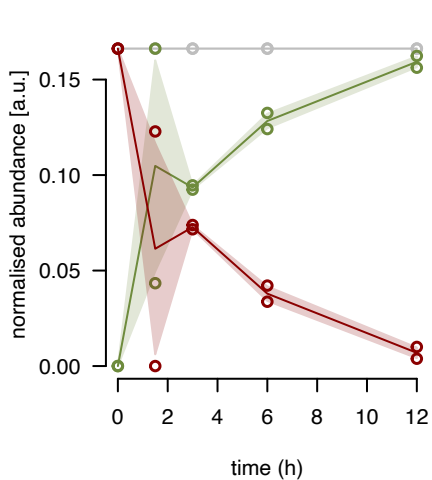**mL50 fraction 3**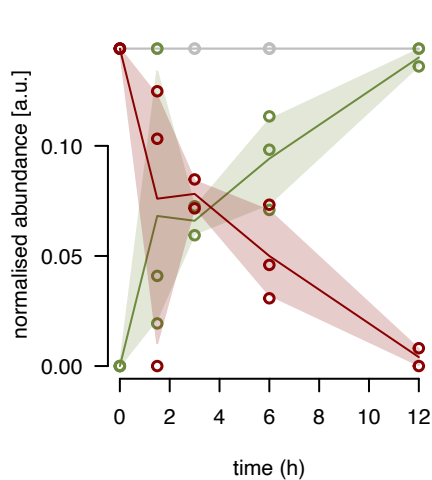**mL50 fraction 4**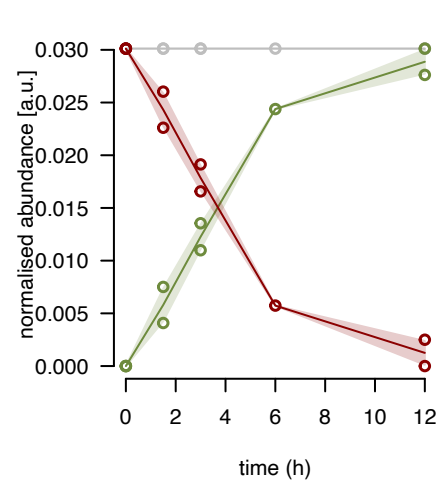**mL50 fraction 5**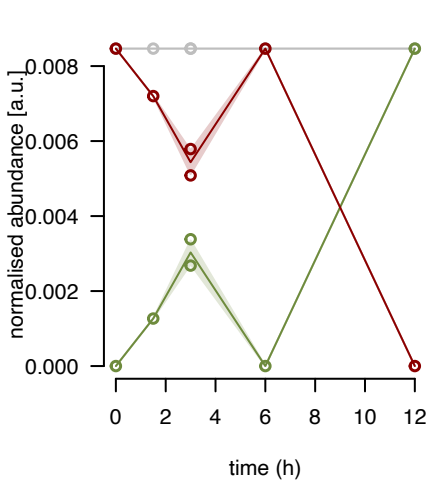**mL50 fraction 6**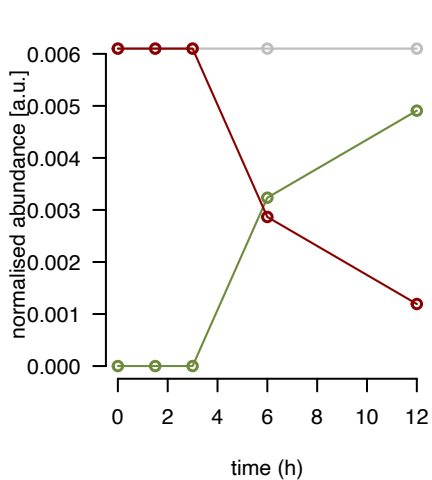**mL50 fraction 7**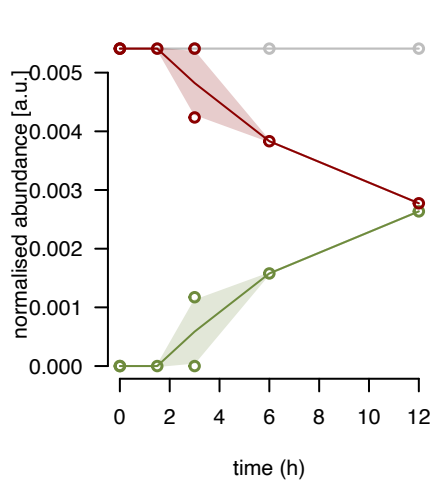**mL50 fraction 8**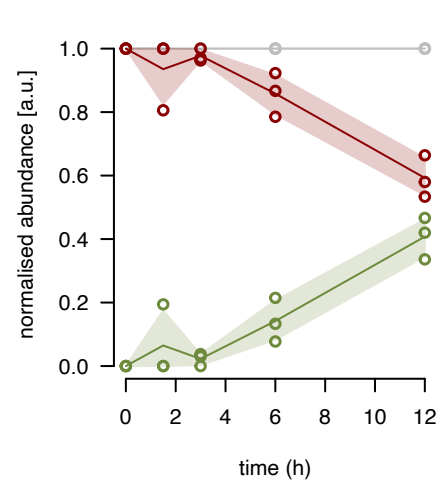**mL50 fraction 9**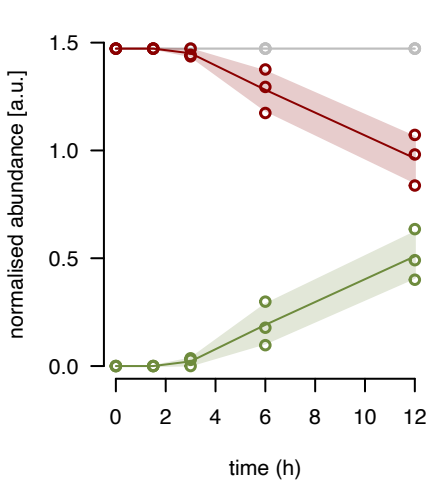**mL50 fraction 10**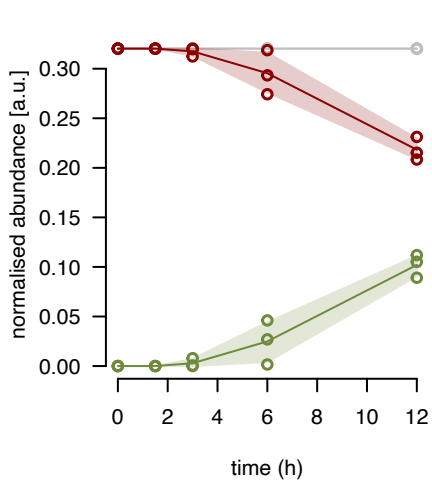**mL50 fraction 11**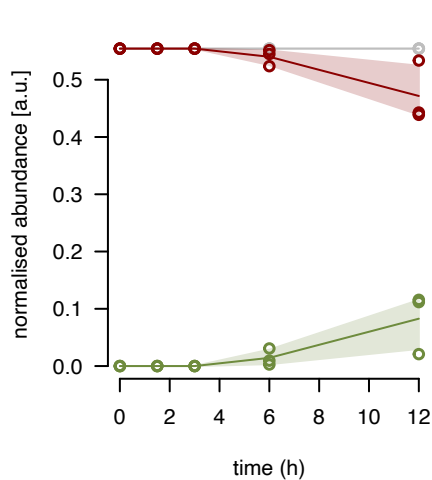**mL50 fraction 12**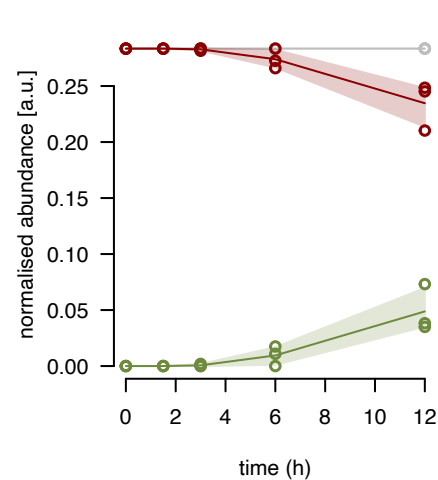**mL50 fraction 13**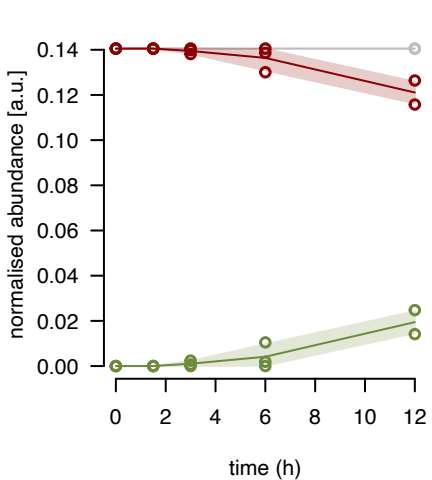**mL50 fraction 14**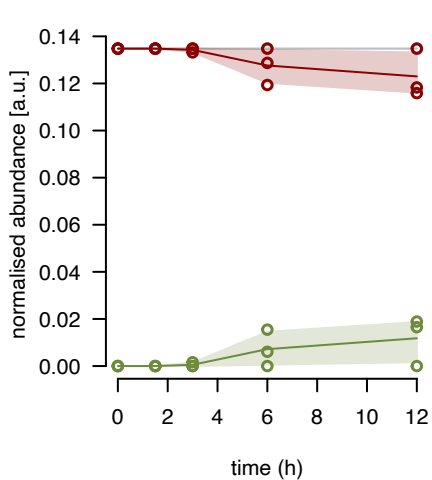**mL50 fraction 15**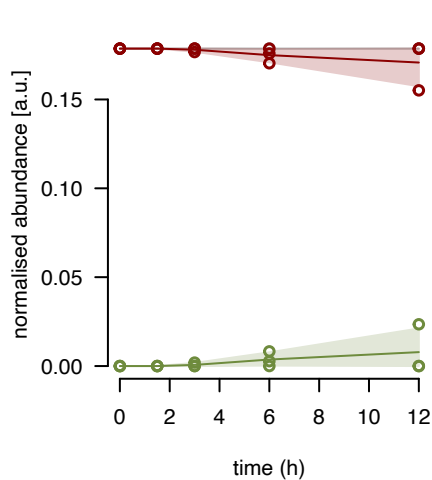**mL50 fraction 16**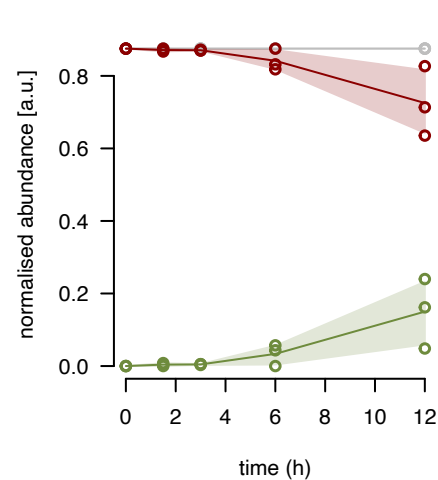

**mL51 fraction 1****mL51 fraction 2****mL51 fraction 3**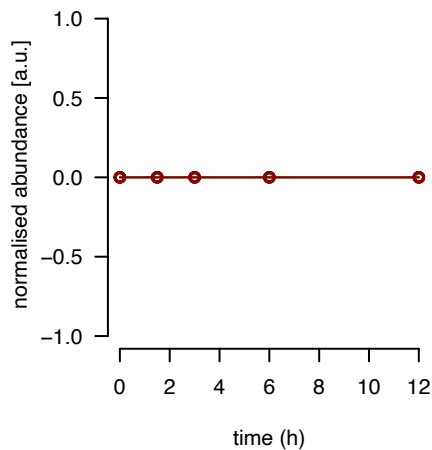**mL51 fraction 4**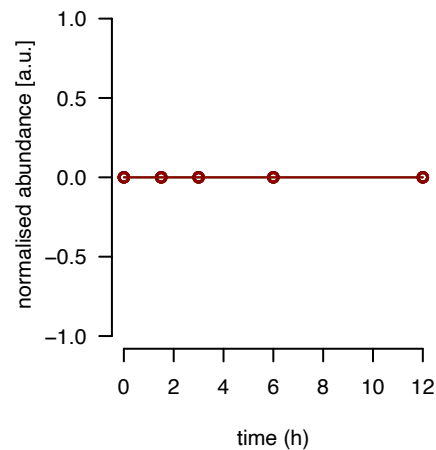**mL51 fraction 5**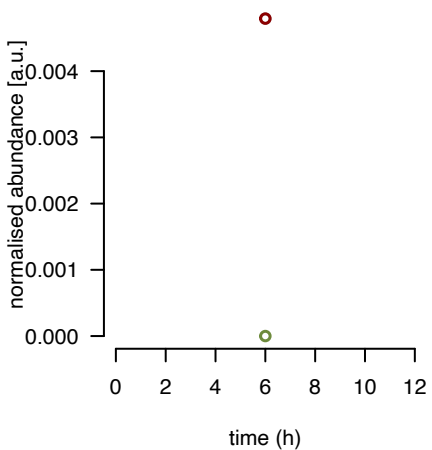**mL51 fraction 6****mL51 fraction 7****mL51 fraction 8**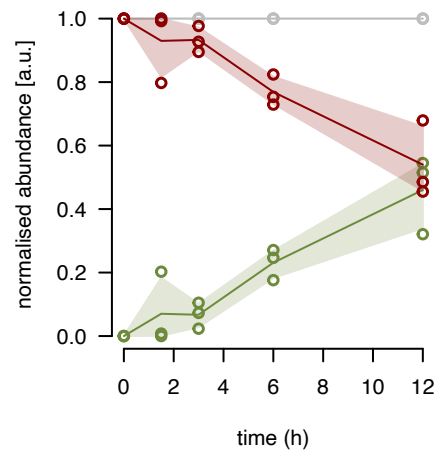**mL51 fraction 9**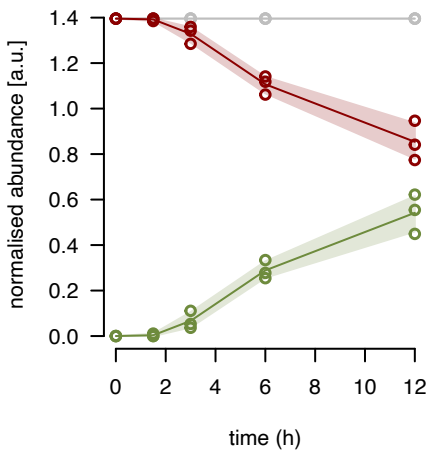**mL51 fraction 10**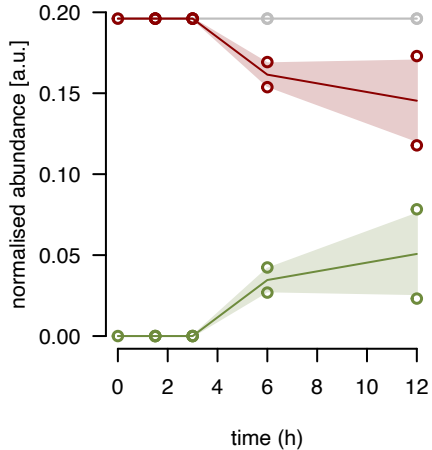**mL51 fraction 11**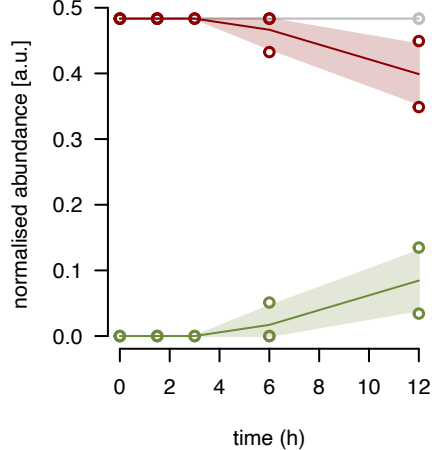**mL51 fraction 12**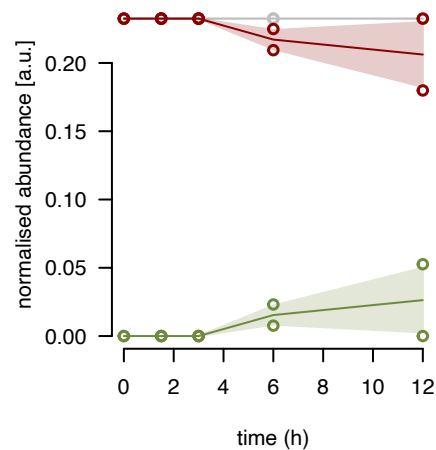**mL51 fraction 13**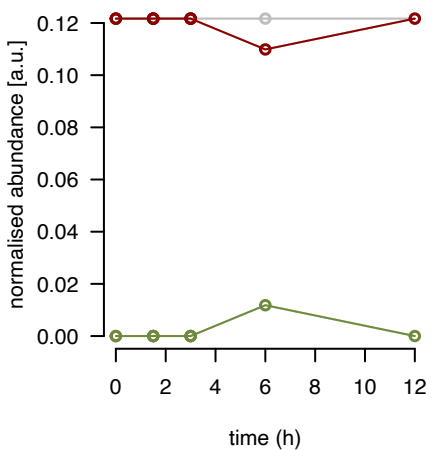**mL51 fraction 14**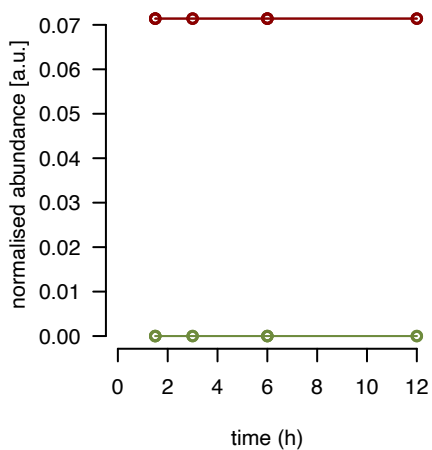**mL51 fraction 15**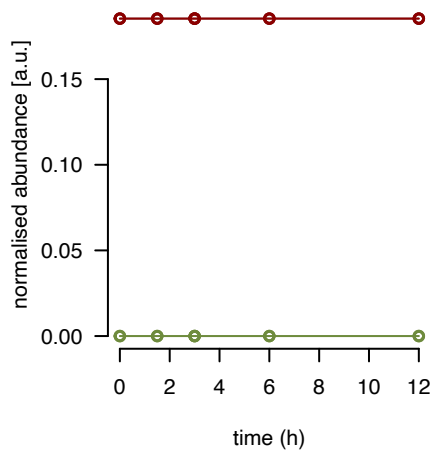**mL51 fraction 16**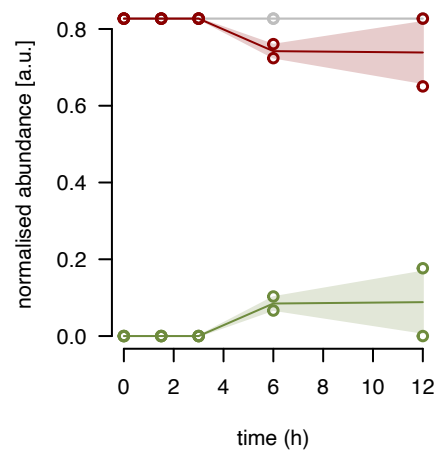

**mL52 fraction 1****mL52 fraction 2****mL52 fraction 3****mL52 fraction 4**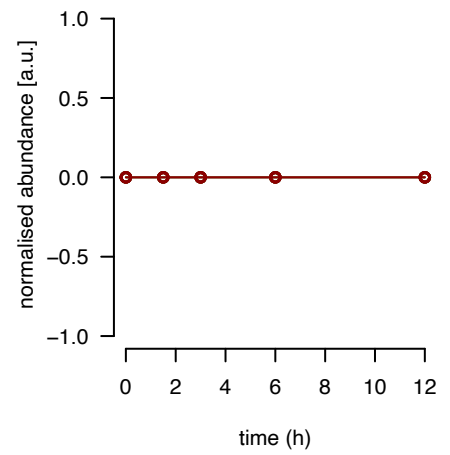**mL52 fraction 5**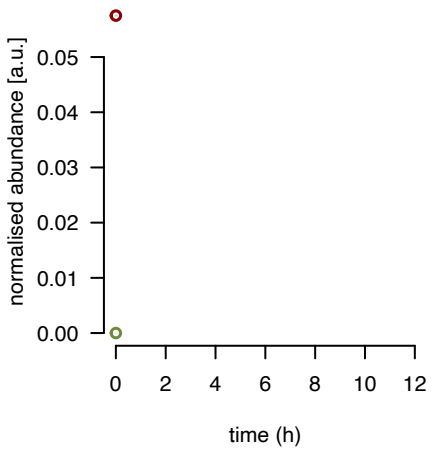**mL52 fraction 6**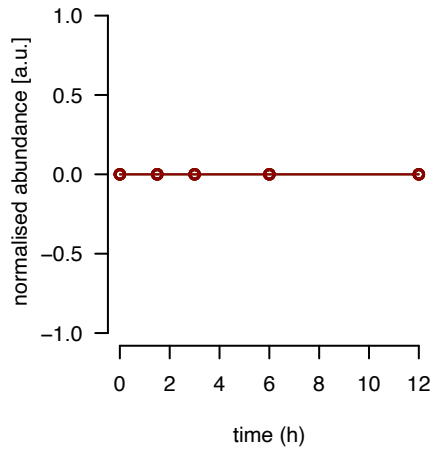**mL52 fraction 7**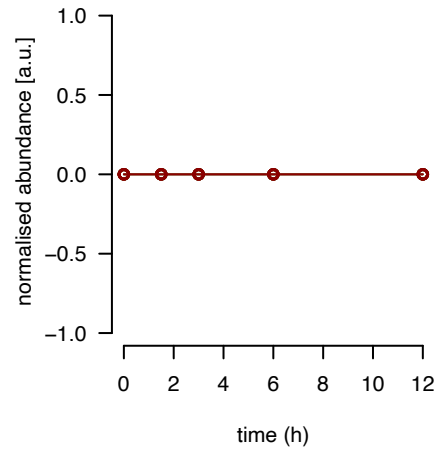**mL52 fraction 8**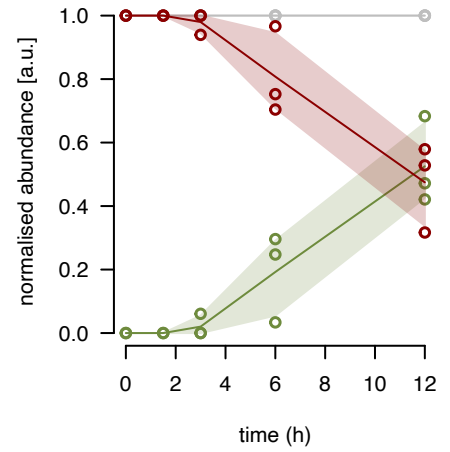**mL52 fraction 9**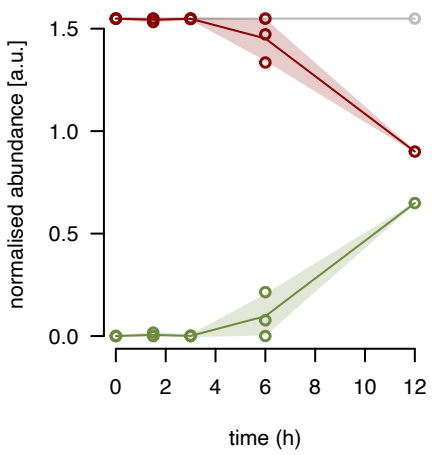**mL52 fraction 10**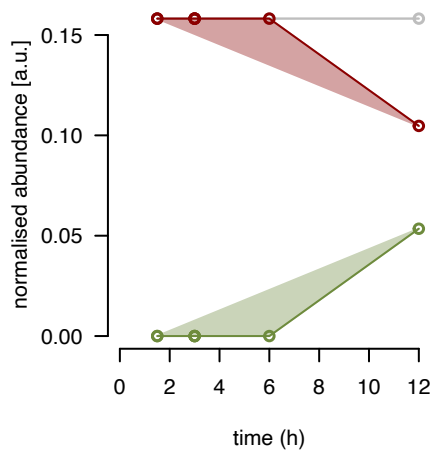**mL52 fraction 11**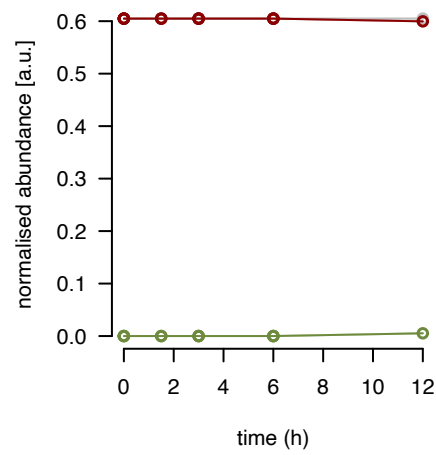**mL52 fraction 12**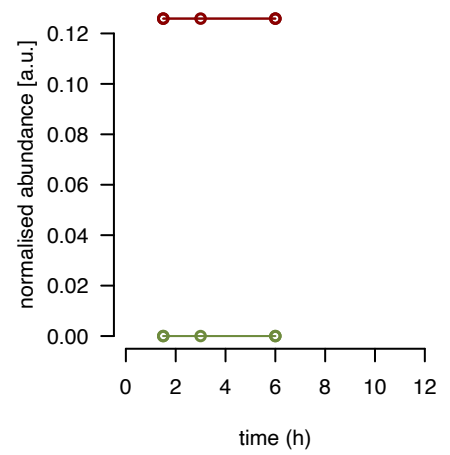**mL52 fraction 13**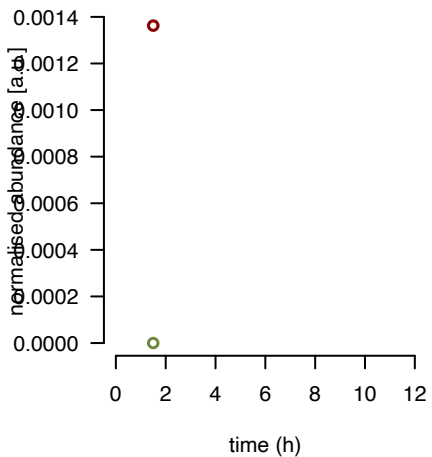**mL52 fraction 14**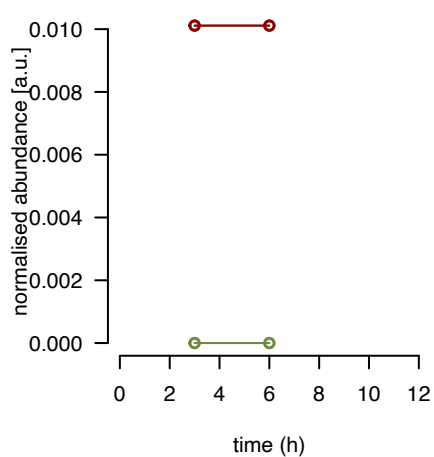**mL52 fraction 15**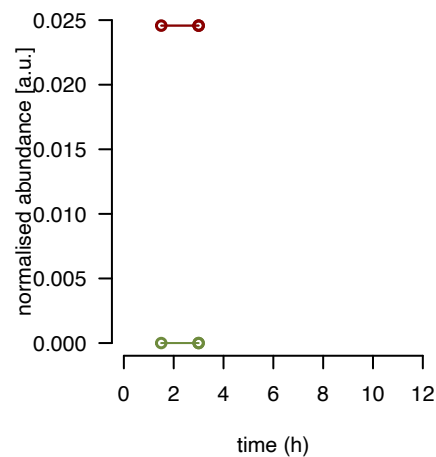**mL52 fraction 16**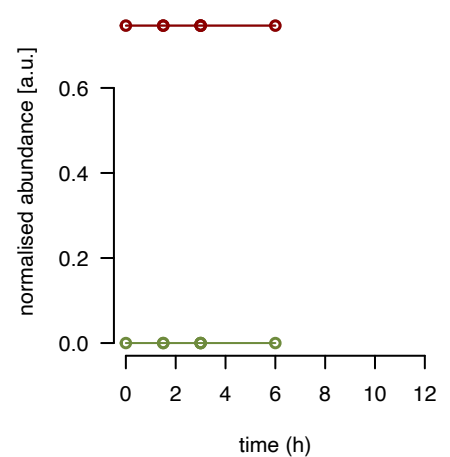

**mL53 fraction 1**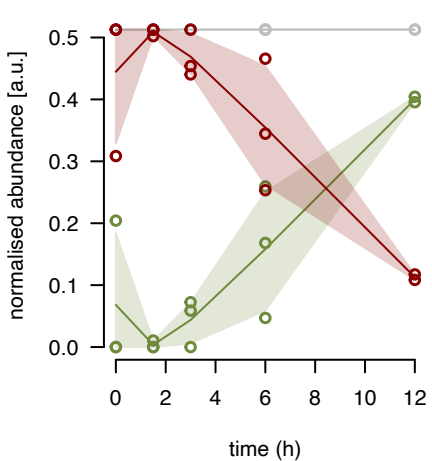**mL53 fraction 2**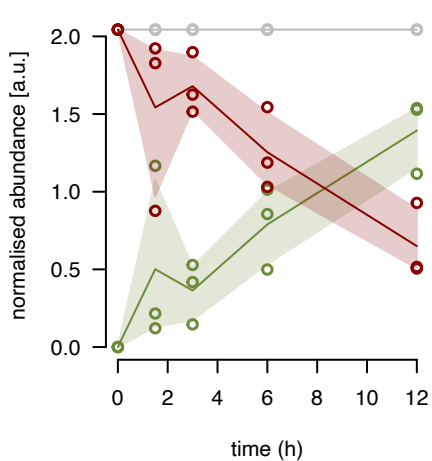**mL53 fraction 3**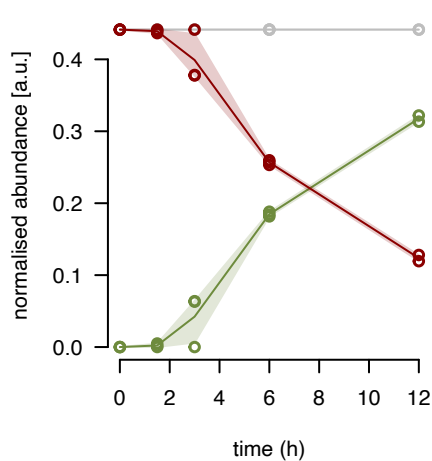**mL53 fraction 4**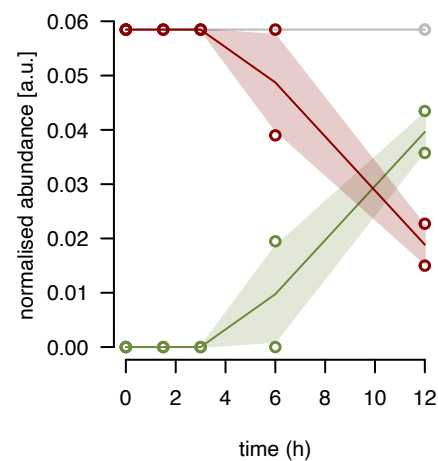**mL53 fraction 5**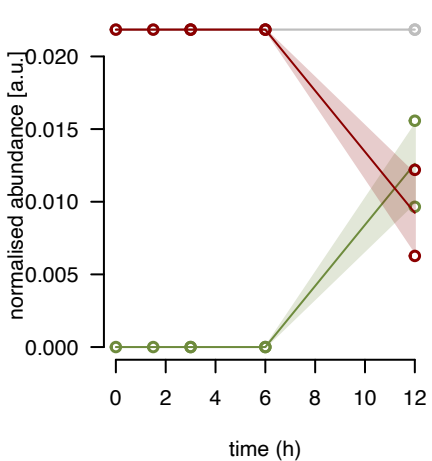**mL53 fraction 6**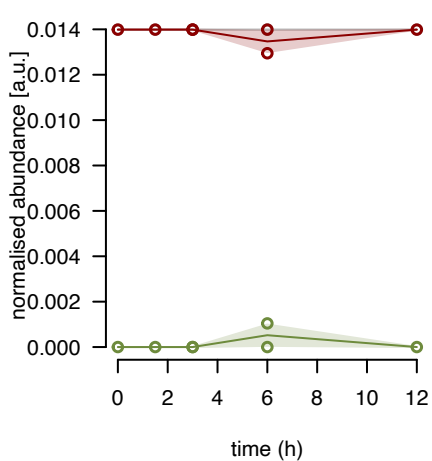**mL53 fraction 7**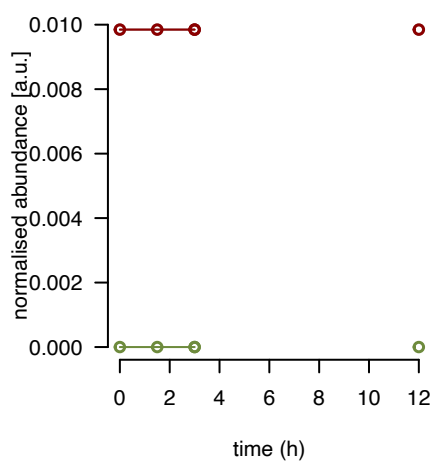**mL53 fraction 8**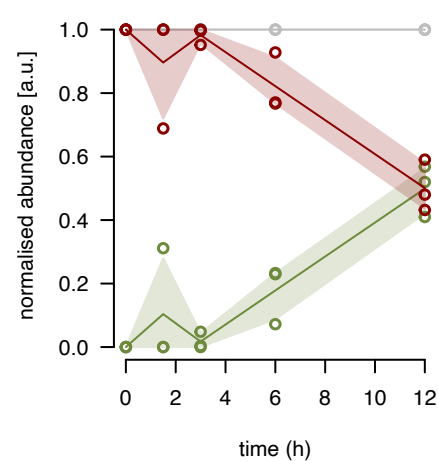**mL53 fraction 9**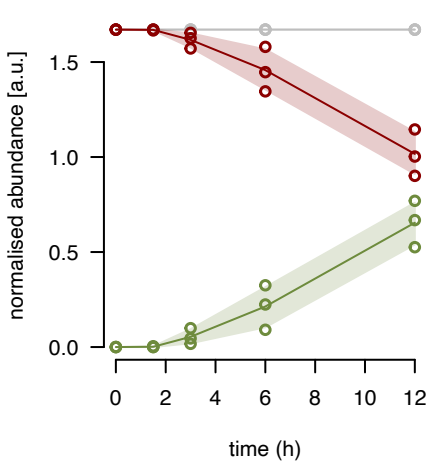**mL53 fraction 10**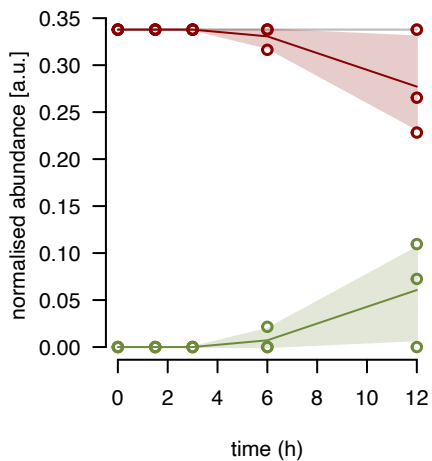**mL53 fraction 11**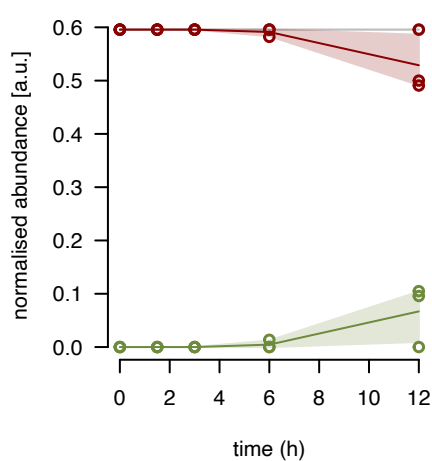**mL53 fraction 12**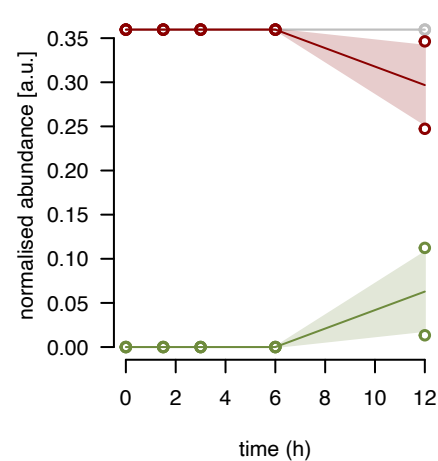**mL53 fraction 13**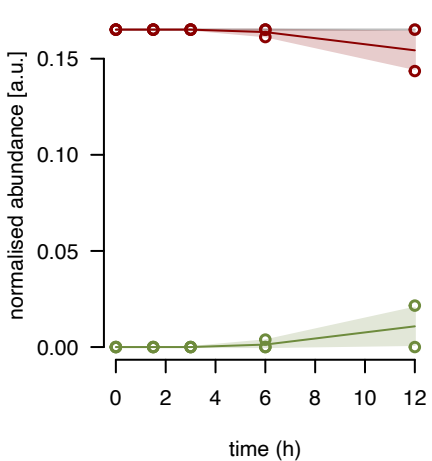**mL53 fraction 14**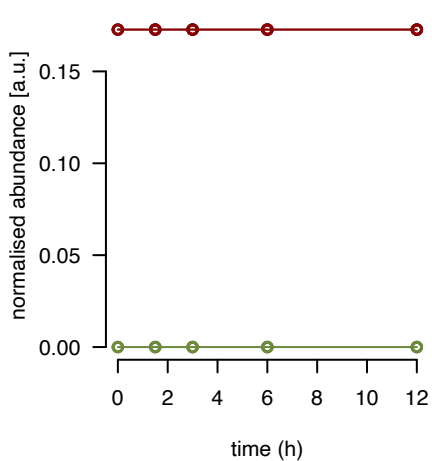**mL53 fraction 15**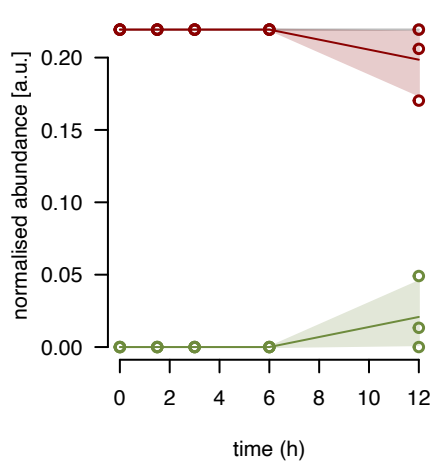**mL53 fraction 16**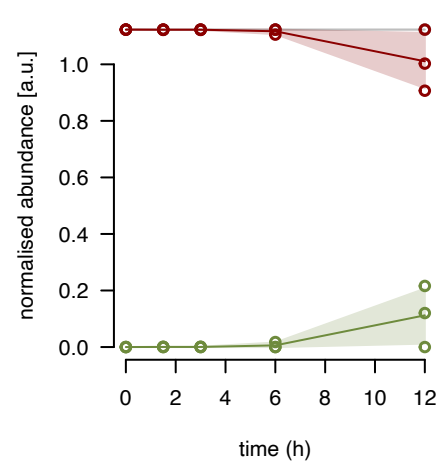

**mL54 fraction 1**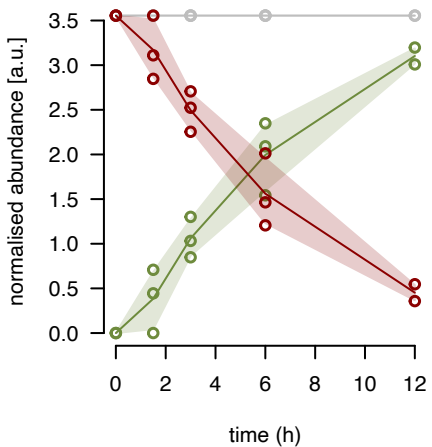**mL54 fraction 2**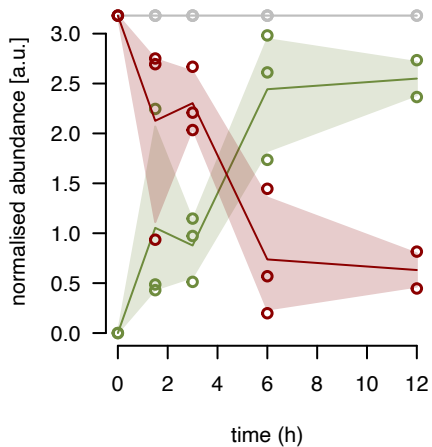**mL54 fraction 3**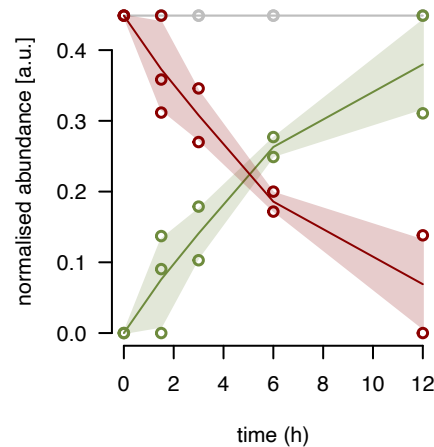**mL54 fraction 4**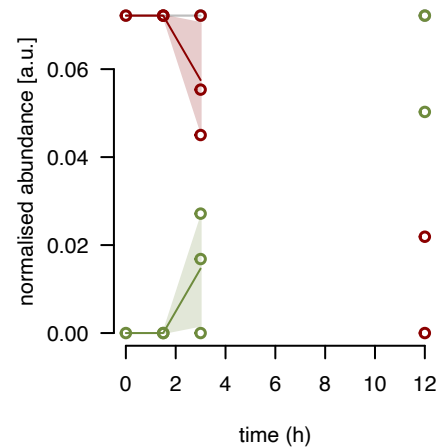**mL54 fraction 5**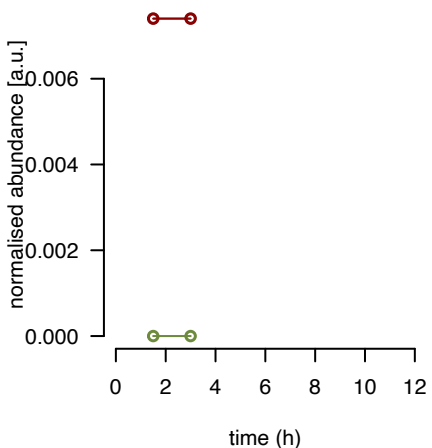**mL54 fraction 6**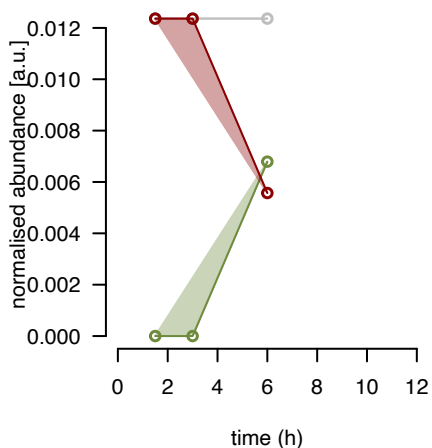**mL54 fraction 7**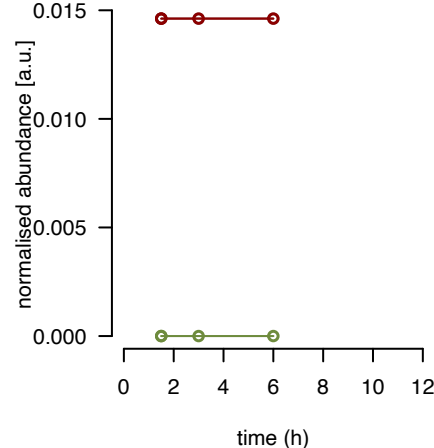**mL54 fraction 8**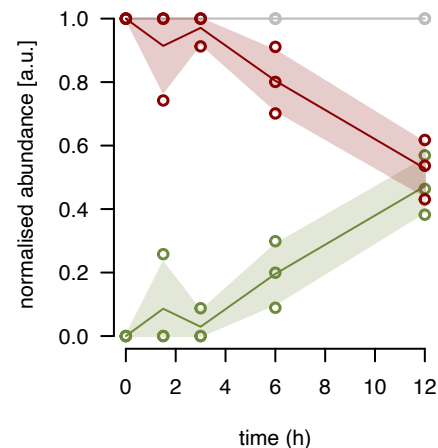**mL54 fraction 9**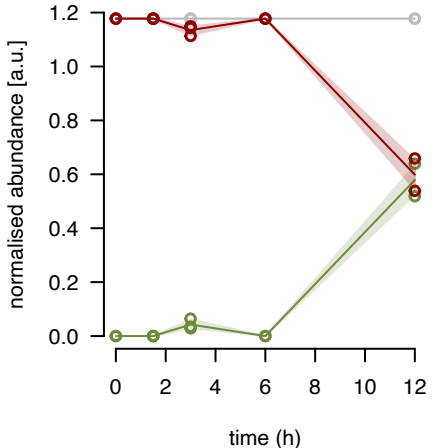**mL54 fraction 10**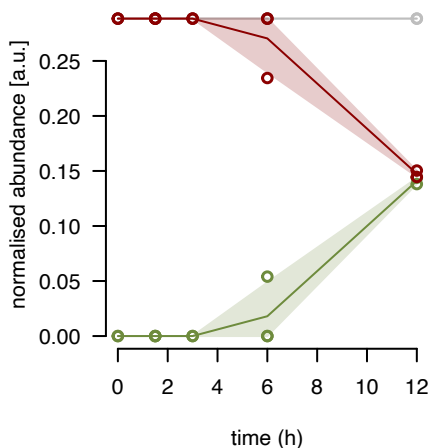**mL54 fraction 11**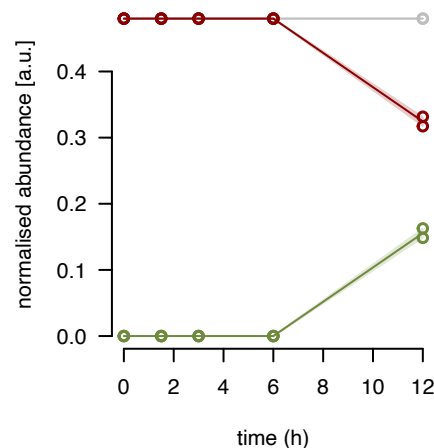**mL54 fraction 12**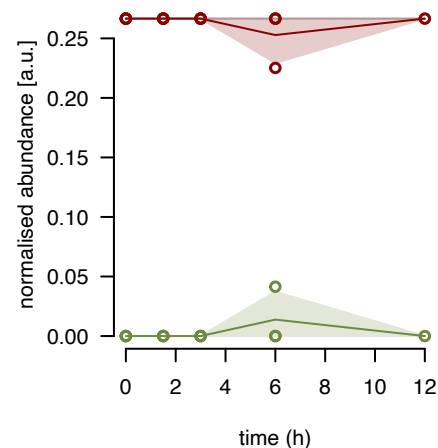**mL54 fraction 13**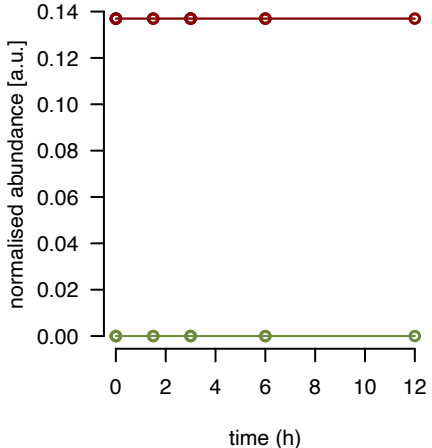**mL54 fraction 14**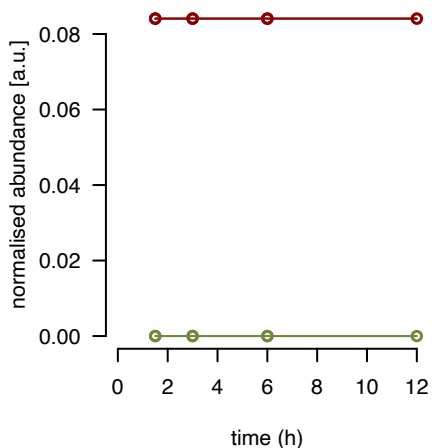**mL54 fraction 15**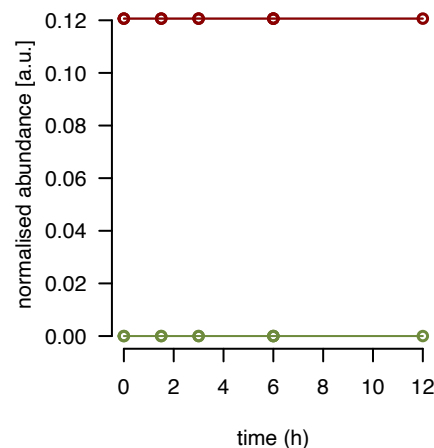**mL54 fraction 16**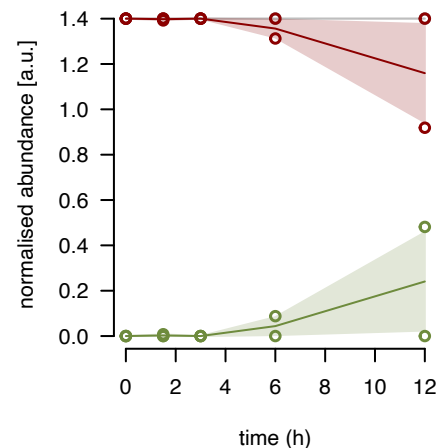

**mL62 fraction 1**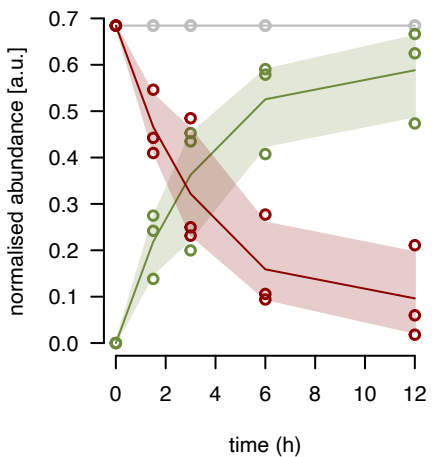**mL62 fraction 2**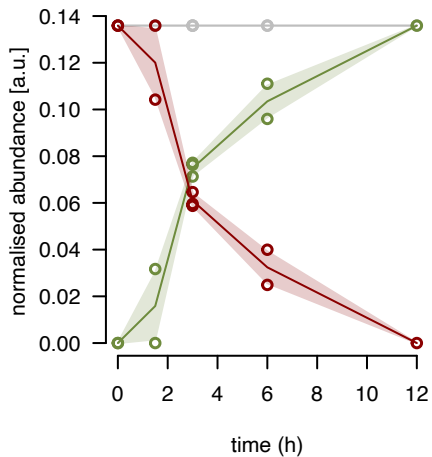**mL62 fraction 3**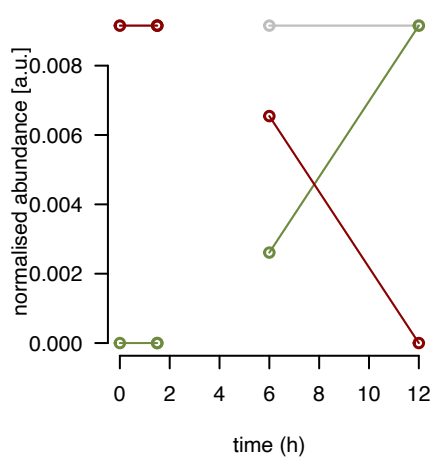**mL62 fraction 4**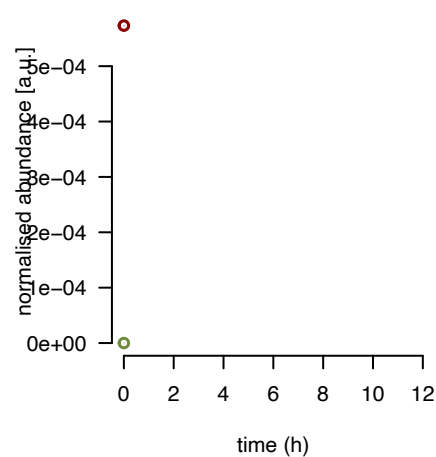**mL62 fraction 5**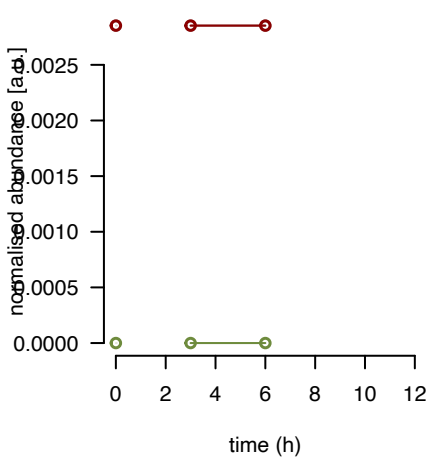**mL62 fraction 6**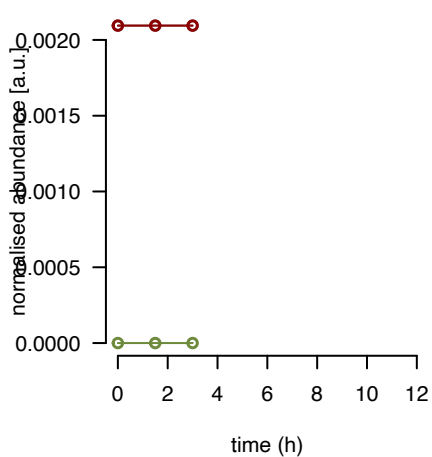**mL62 fraction 7**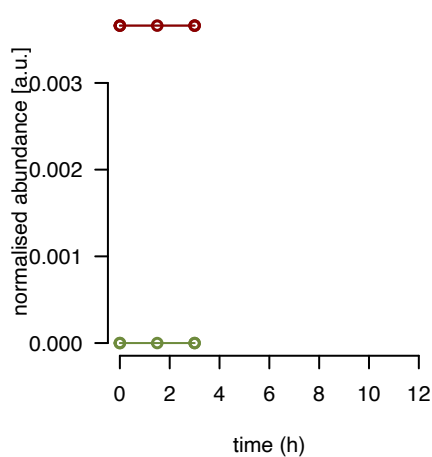**mL62 fraction 8**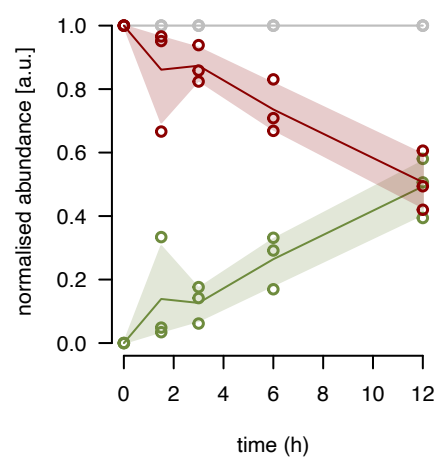**mL62 fraction 9**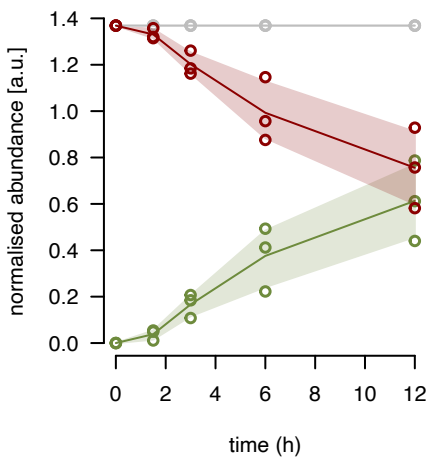**mL62 fraction 10**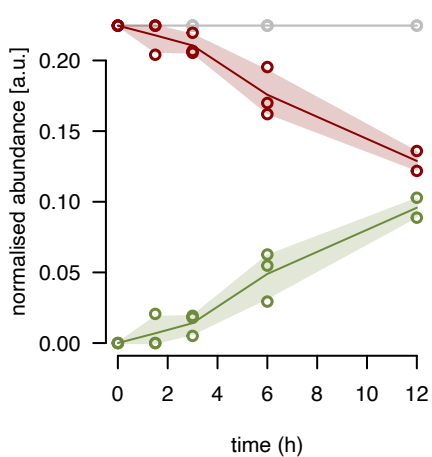**mL62 fraction 11**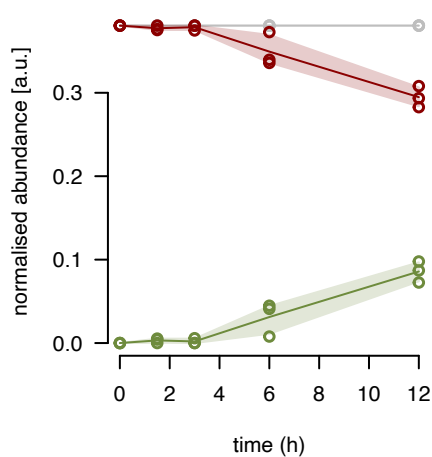**mL62 fraction 12**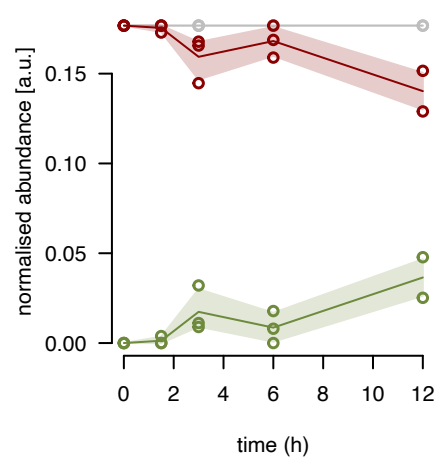**mL62 fraction 13**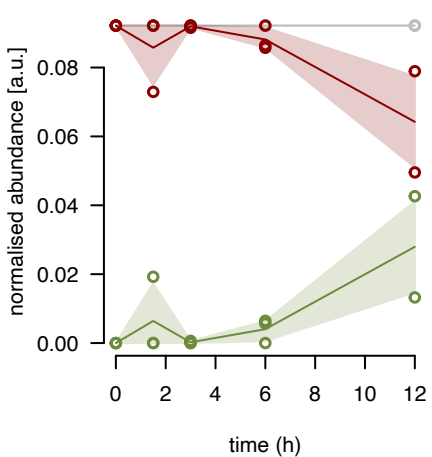**mL62 fraction 14**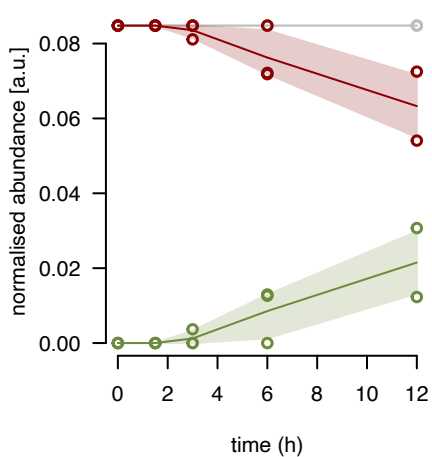**mL62 fraction 15**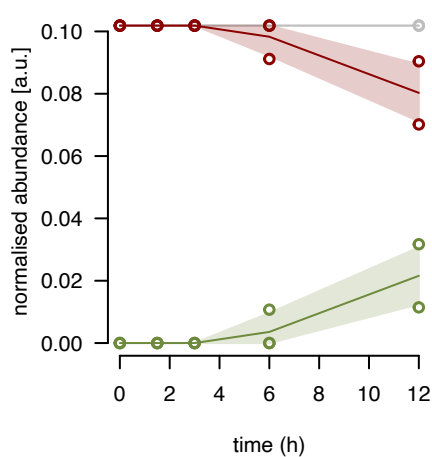**mL62 fraction 16**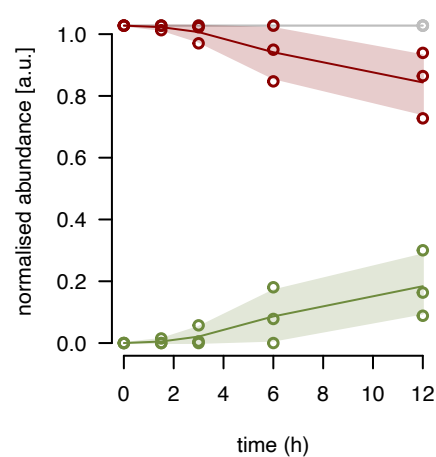



**mL63 fraction 1****mL63 fraction 2****mL63 fraction 3****mL63 fraction 4****mL63 fraction 5**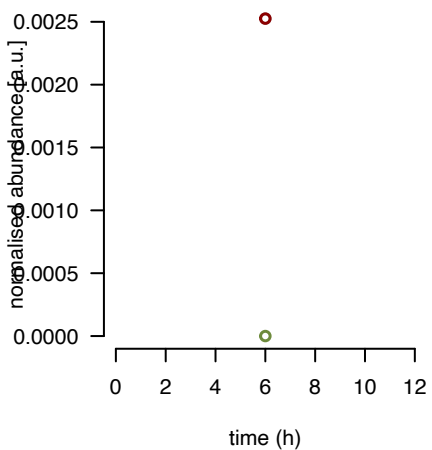**mL63 fraction 6**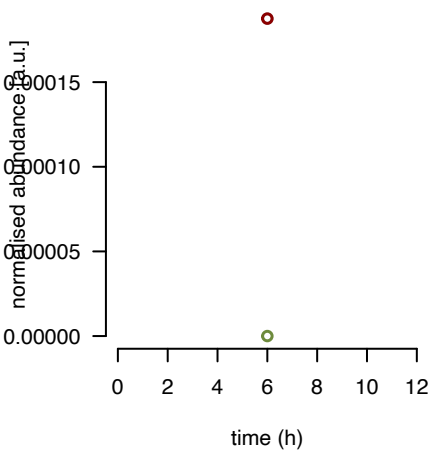**mL63 fraction 7**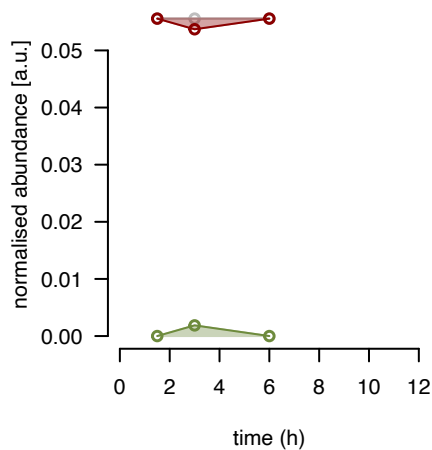**mL63 fraction 8**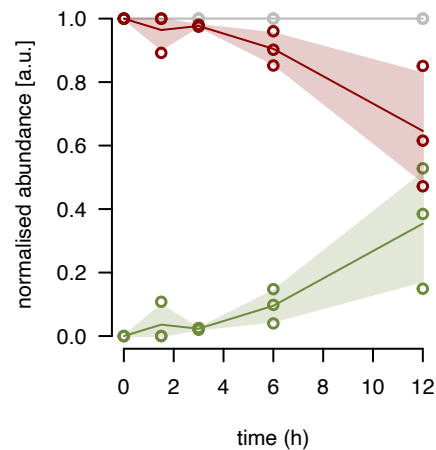**mL63 fraction 9**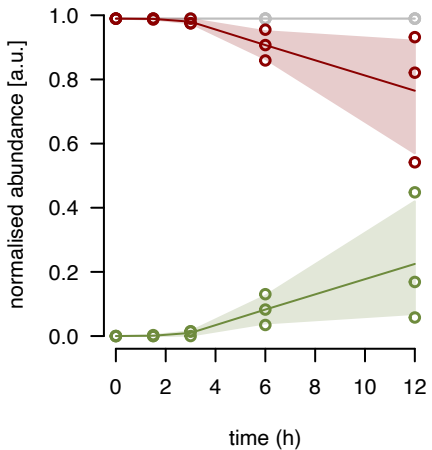**mL63 fraction 10**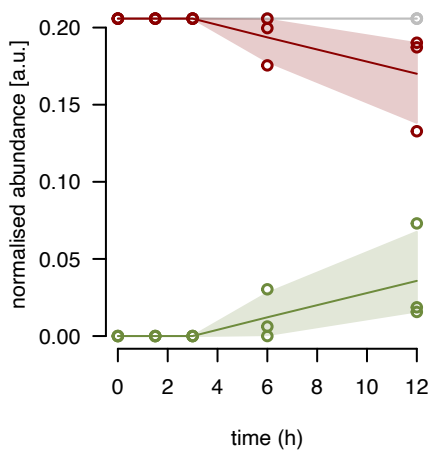**mL63 fraction 11**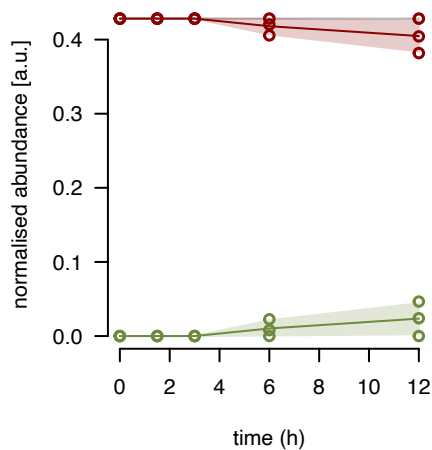**mL63 fraction 12**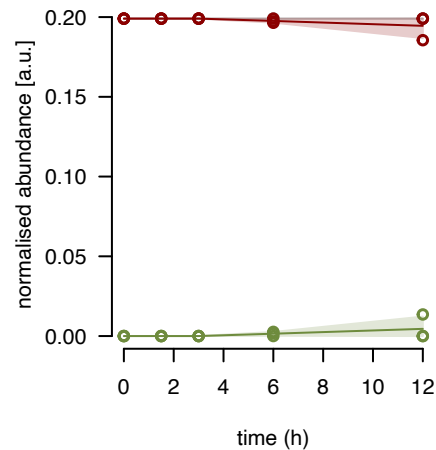**mL63 fraction 13**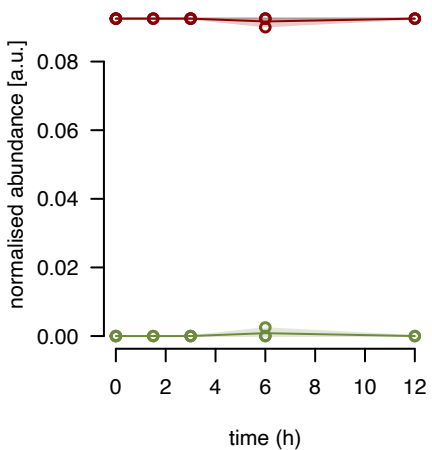**mL63 fraction 14**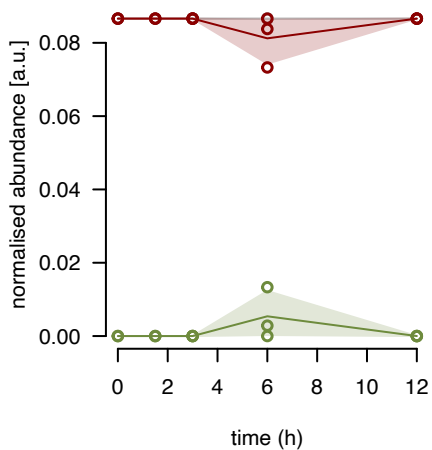**mL63 fraction 15**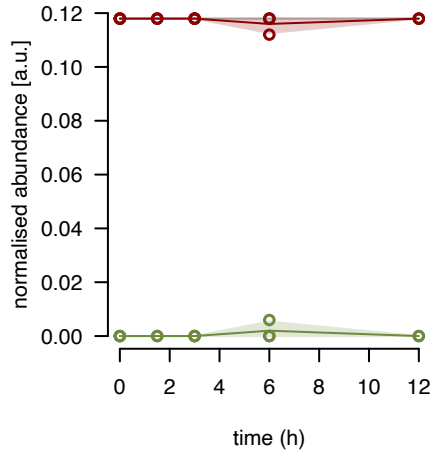**mL63 fraction 16**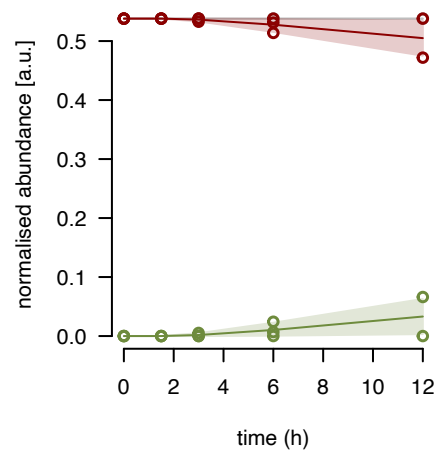

**mL64 fraction 1****mL64 fraction 2**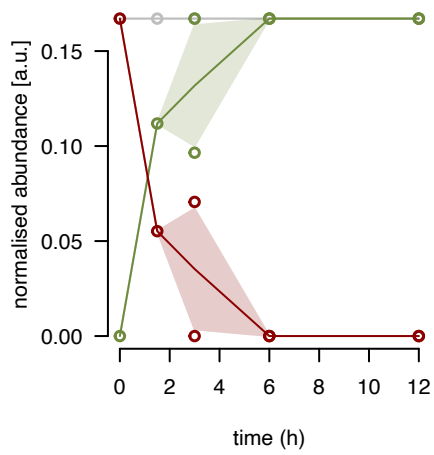**mL64 fraction 3**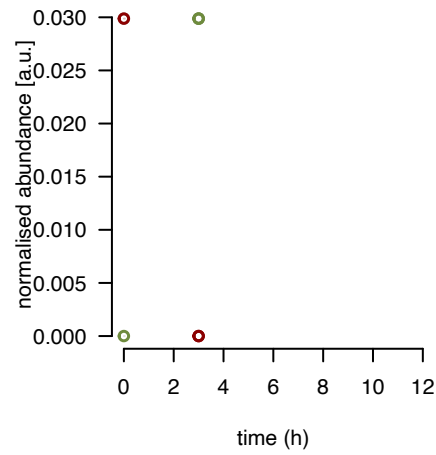**mL64 fraction 4**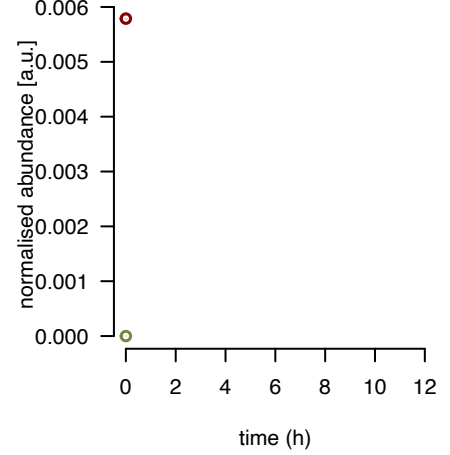**mL64 fraction 5**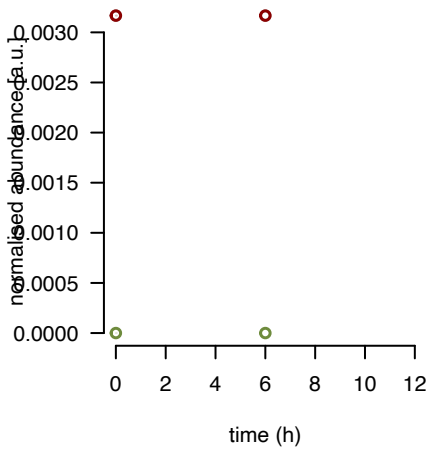**mL64 fraction 6**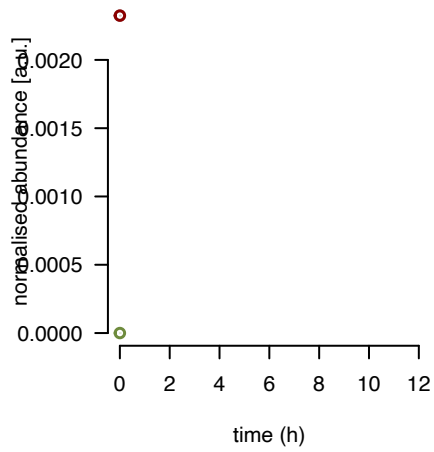**mL64 fraction 7**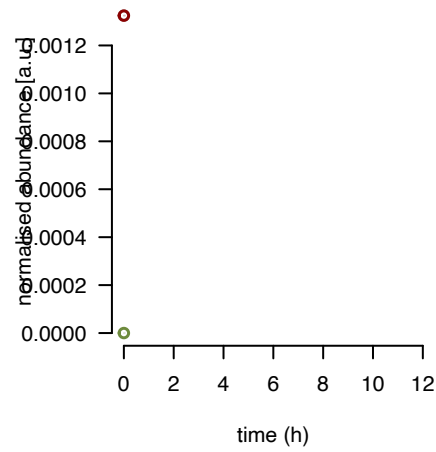**mL64 fraction 8**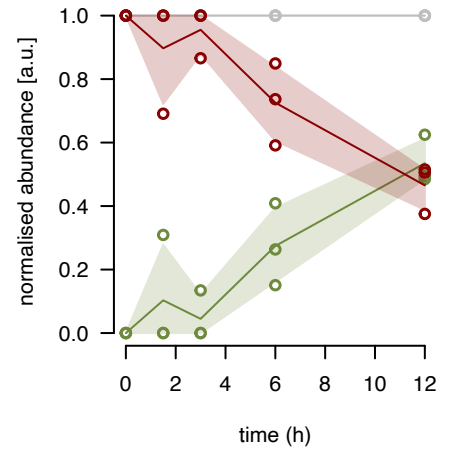**mL64 fraction 9**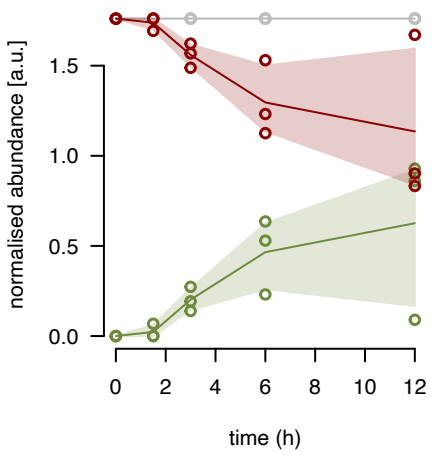**mL64 fraction 10**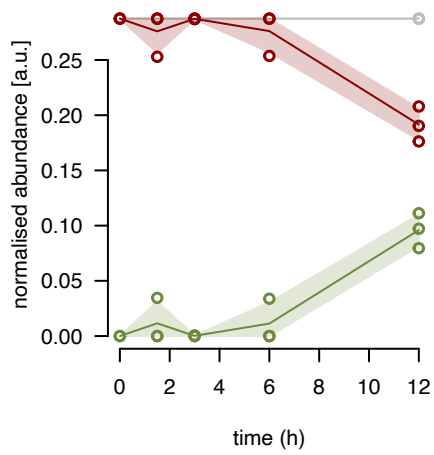**mL64 fraction 11**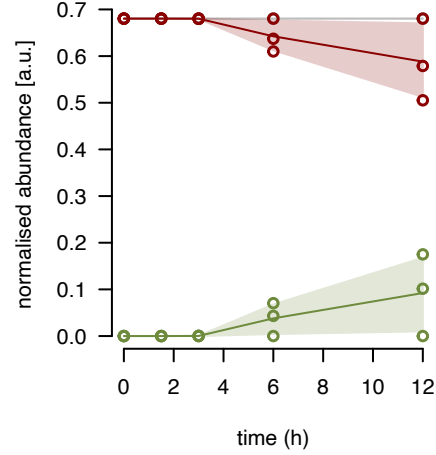**mL64 fraction 12**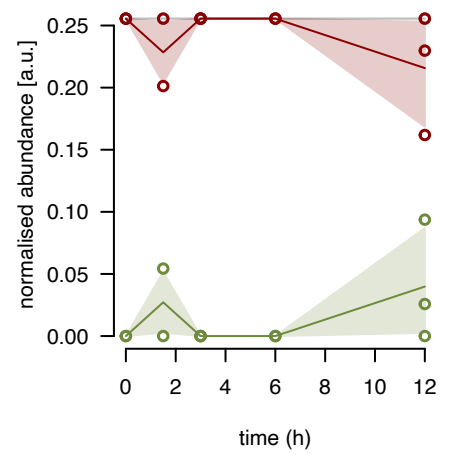**mL64 fraction 13**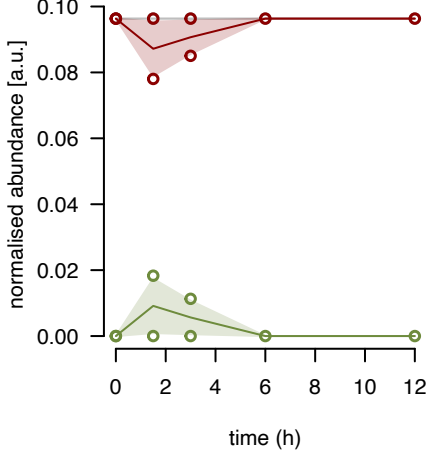**mL64 fraction 14**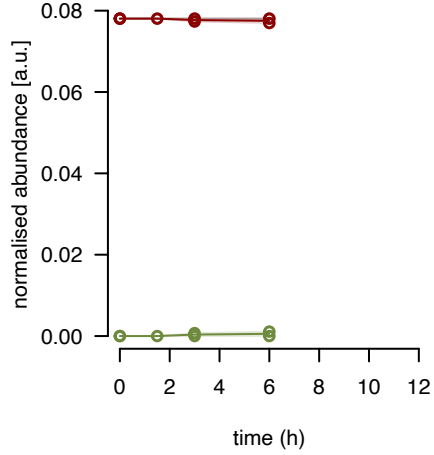**mL64 fraction 15**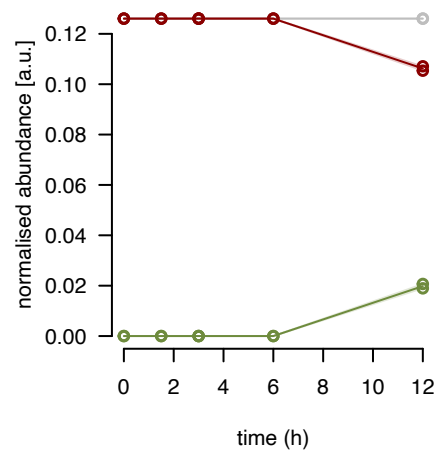**mL64 fraction 16**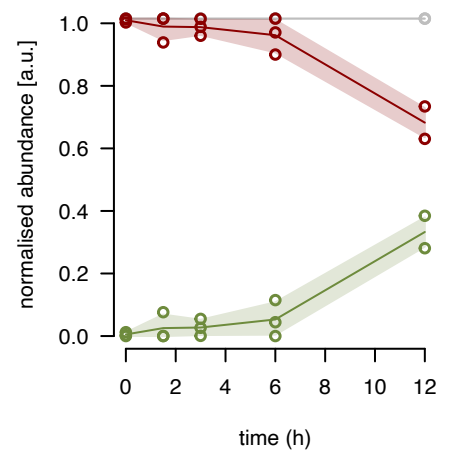

**mL65 fraction 1**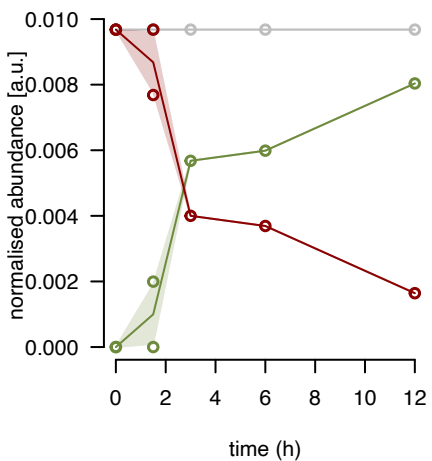**mL65 fraction 2**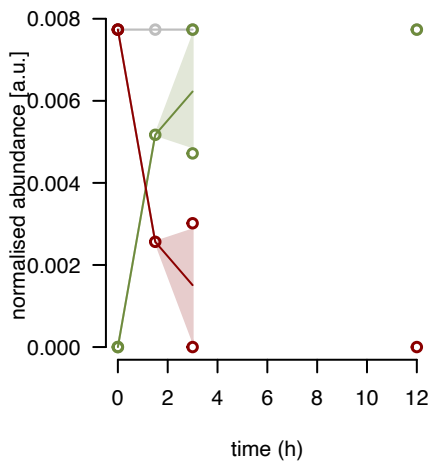**mL65 fraction 3**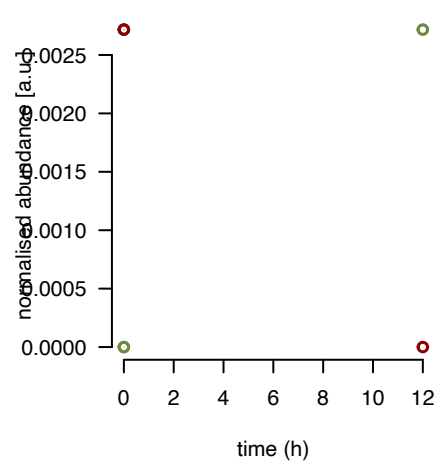**mL65 fraction 4**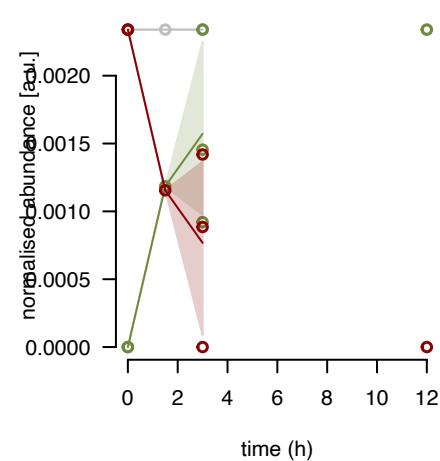**mL65 fraction 5**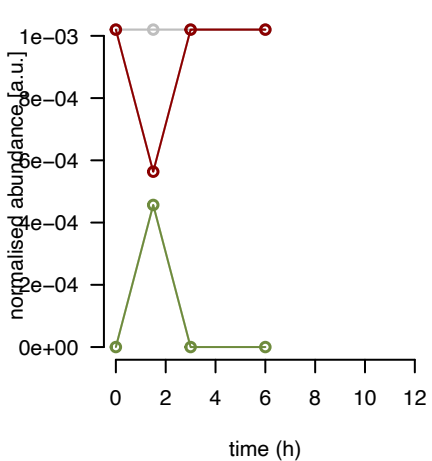**mL65 fraction 6**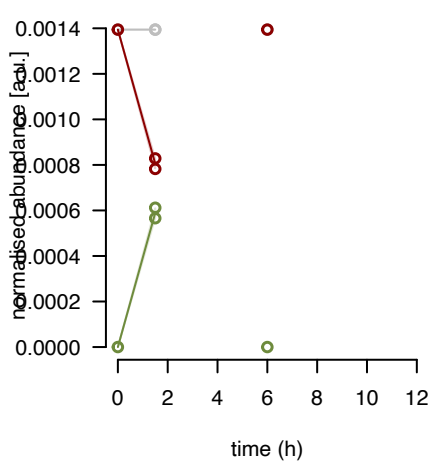**mL65 fraction 7**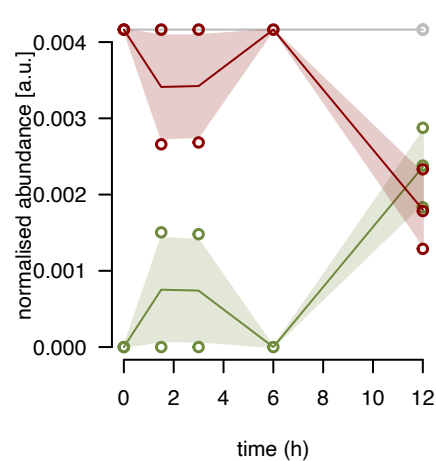**mL65 fraction 8**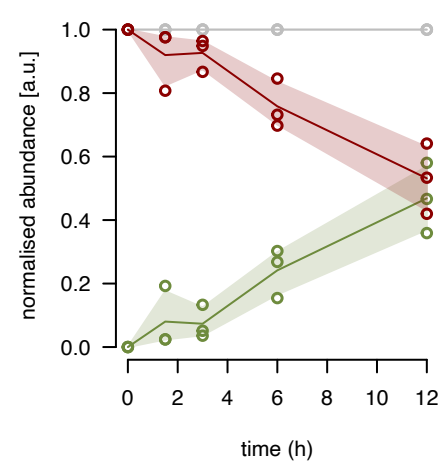**mL65 fraction 9**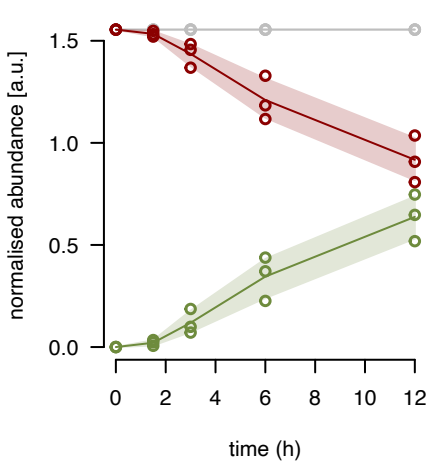**mL65 fraction 10**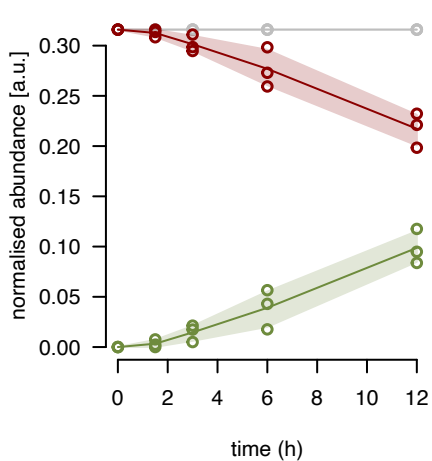**mL65 fraction 11**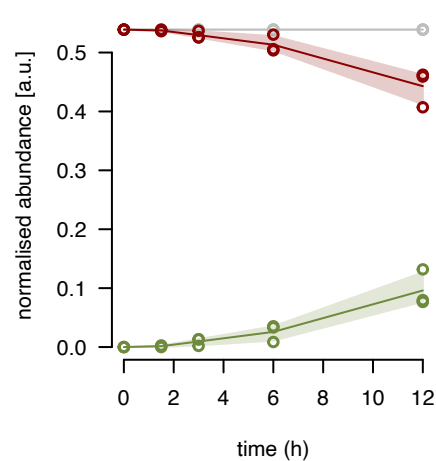**mL65 fraction 12**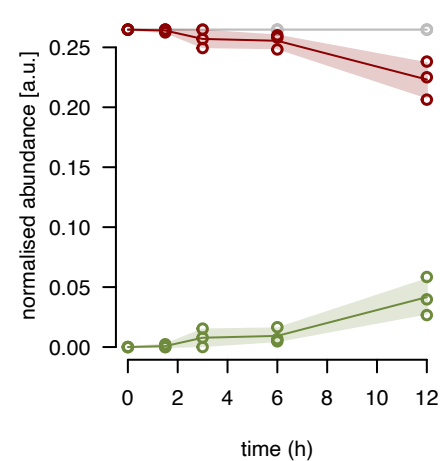**mL65 fraction 13**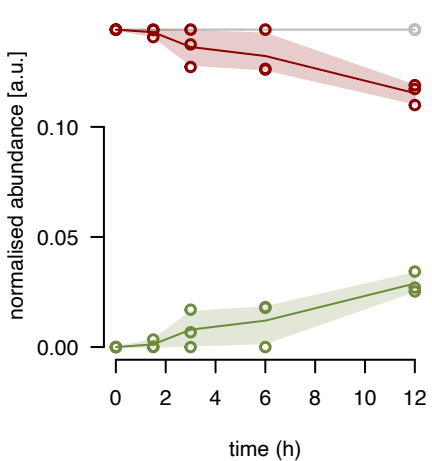**mL65 fraction 14**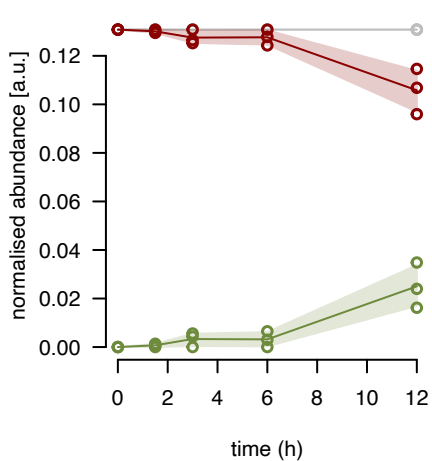**mL65 fraction 15**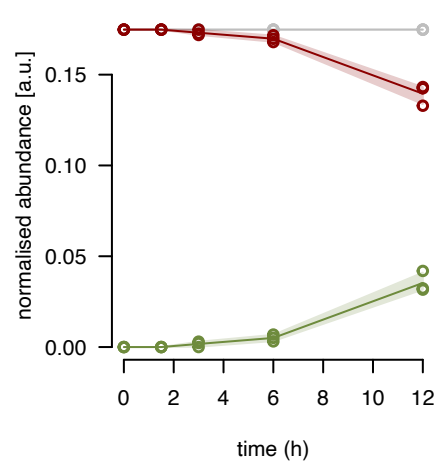**mL65 fraction 16**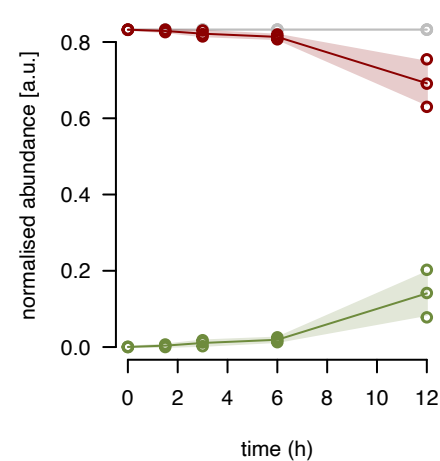

**mL66 fraction 1****mL66 fraction 2**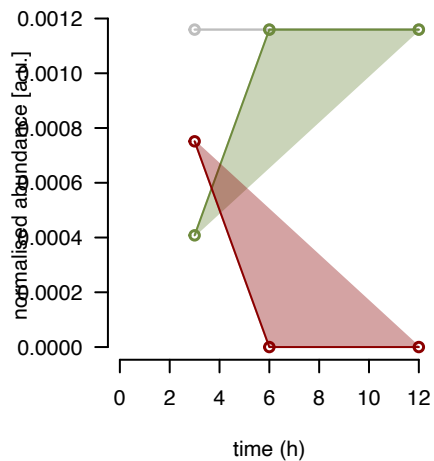**mL66 fraction 3**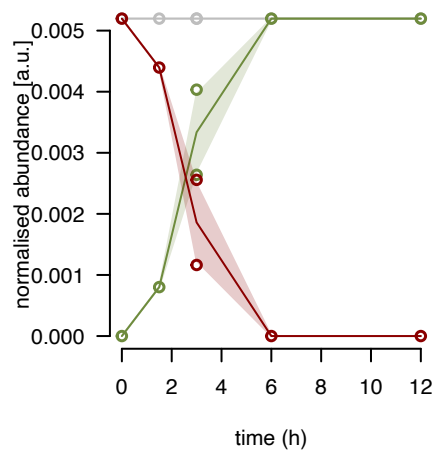**mL66 fraction 4**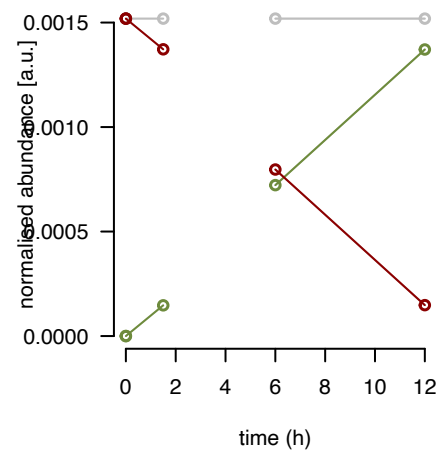**mL66 fraction 5**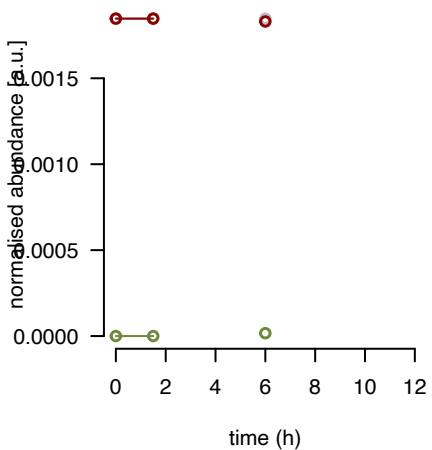**mL66 fraction 6**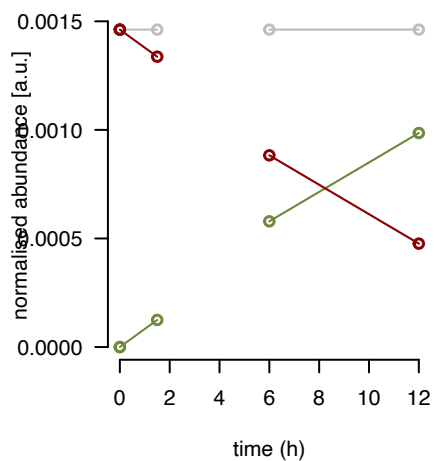**mL66 fraction 7**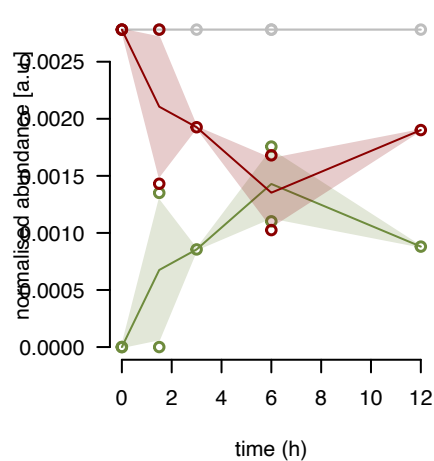**mL66 fraction 8**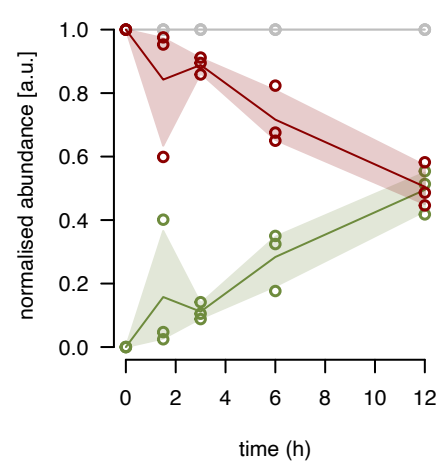**mL66 fraction 9**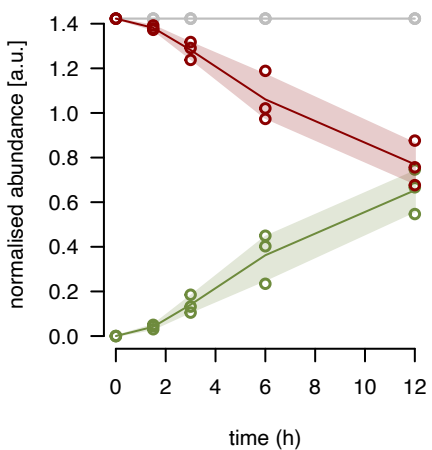**mL66 fraction 10**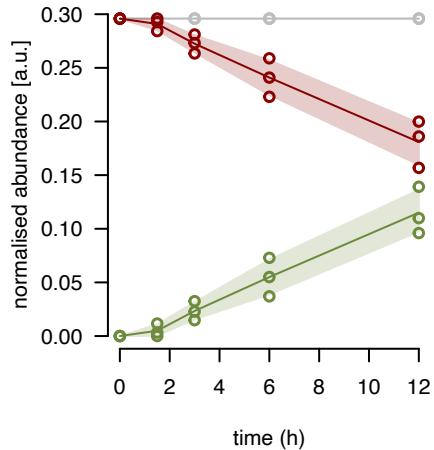**mL66 fraction 11**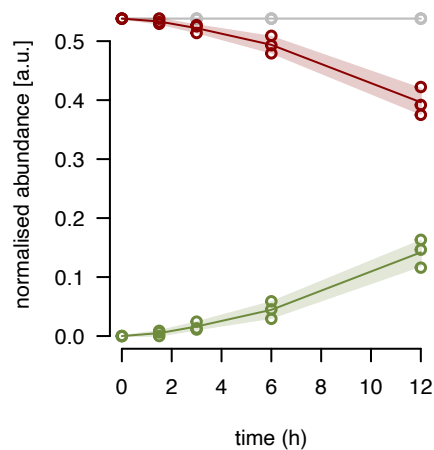**mL66 fraction 12**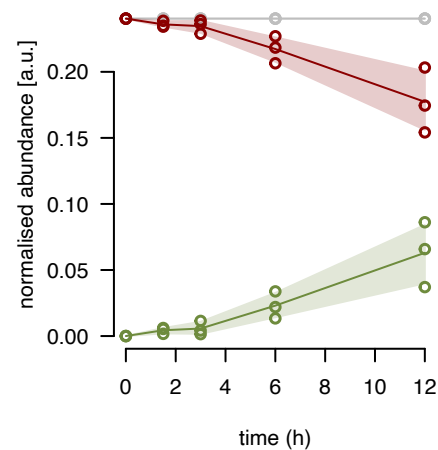**mL66 fraction 13**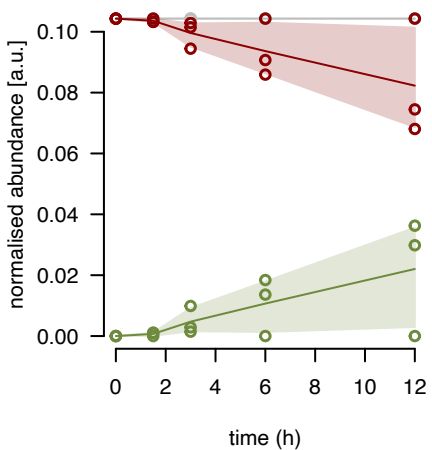**mL66 fraction 14**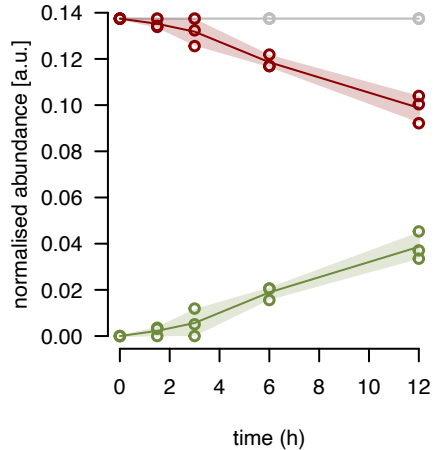**mL66 fraction 15**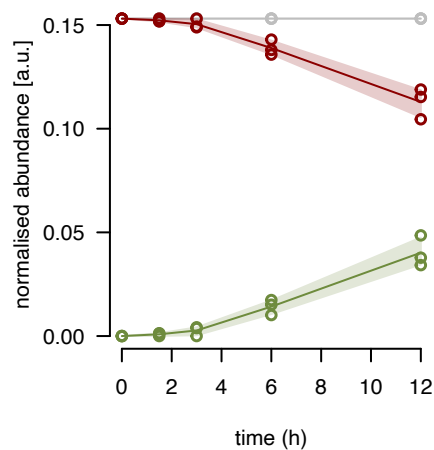**mL66 fraction 16**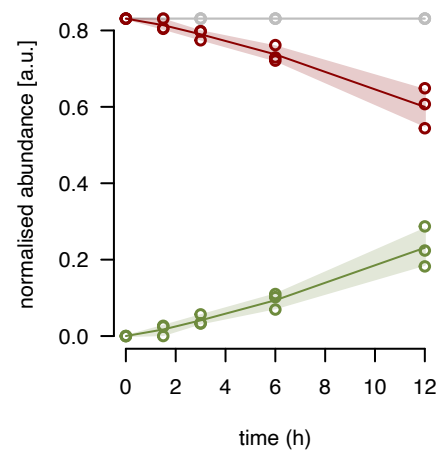

Supplement: 41594_2024_1356_MOESM8_ESM.pdf [file 41594_2024_1356_MOESM8_ESM.pdf]
