# Supplementary material for: A roadmap for ribosome assembly in human mitochondria
Source: PubMed Central journal article supplement (PMC11638073; doi:10.1038/s41594-024-01356-w), 2024-07-11

**bs1m fraction: 1**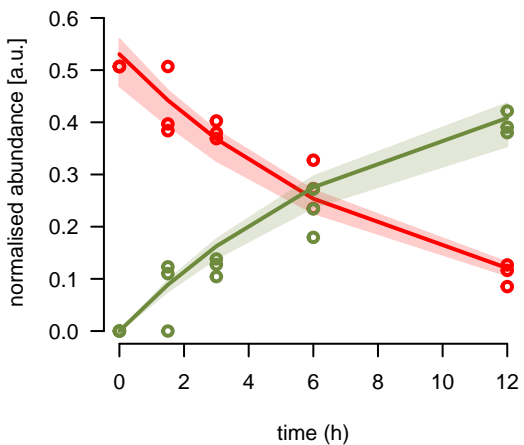**fraction: 2**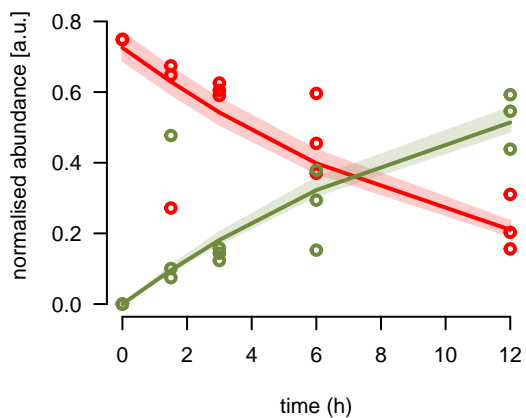**fraction: 3**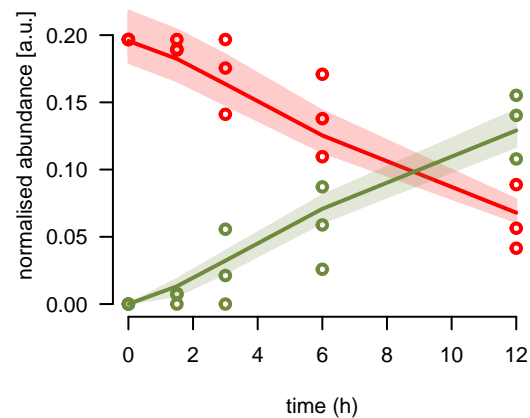**fraction: 4**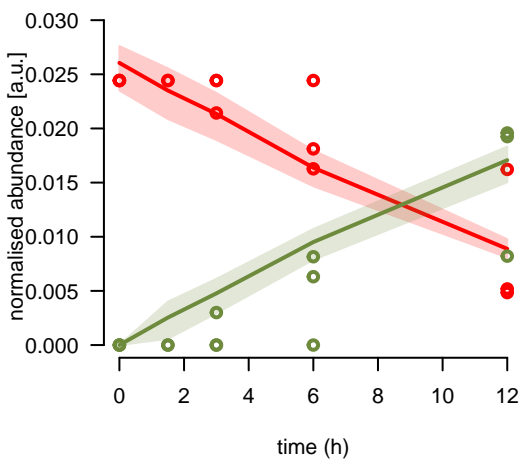**fraction: 5**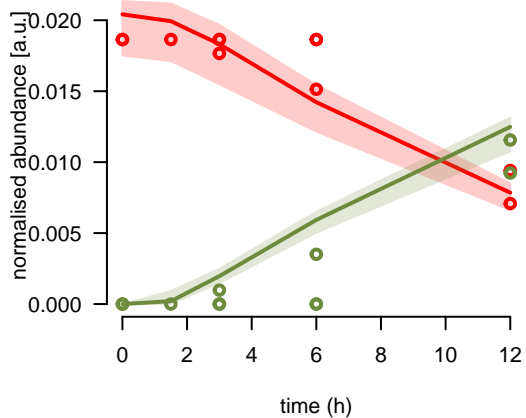**fraction: 6**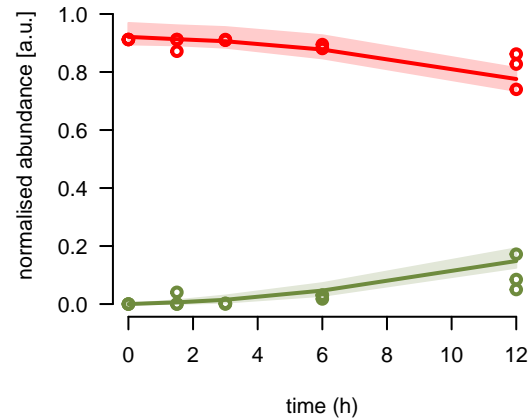**fraction: 7**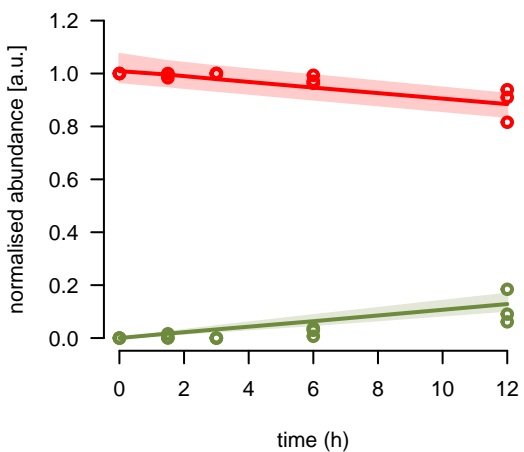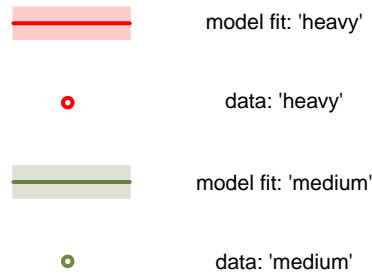**abundances**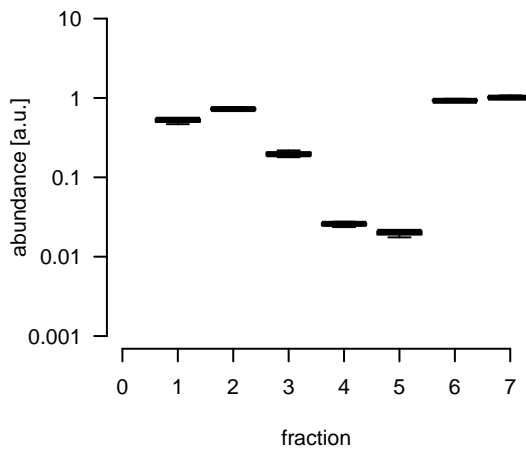**fluxes**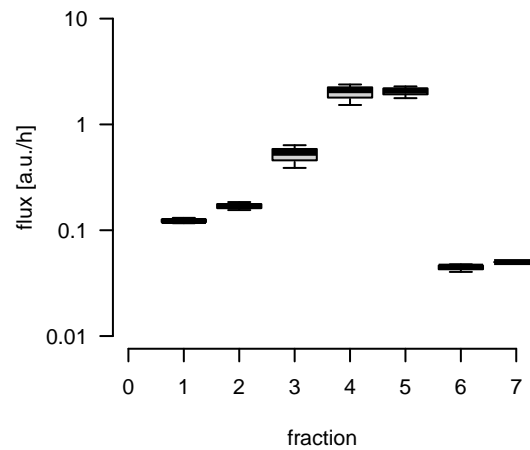

**uS2m fraction: 1**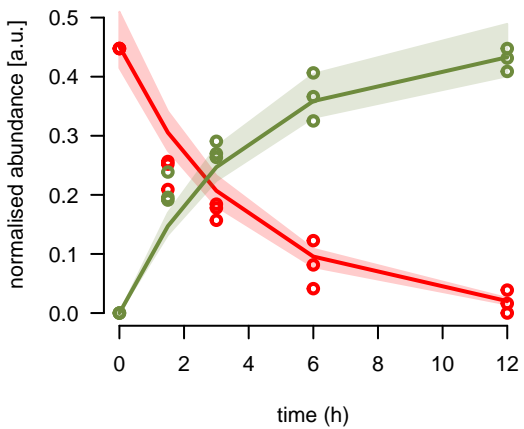**fraction: 2**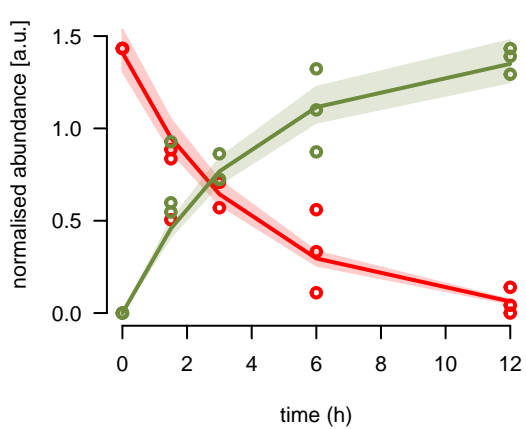**fraction: 3**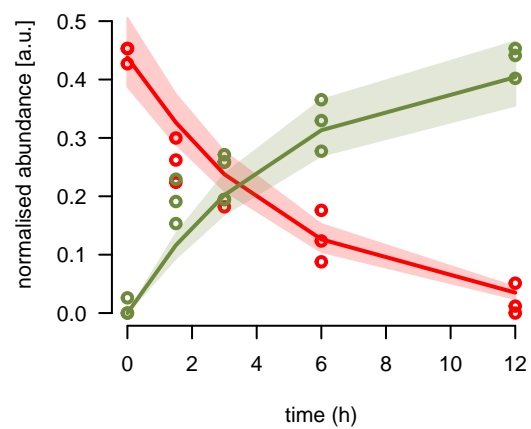**fraction: 4**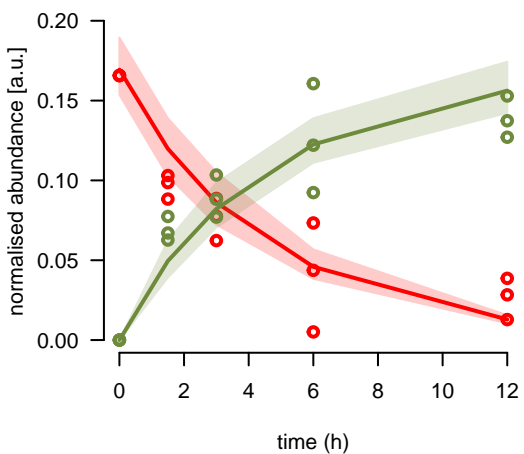**fraction: 5**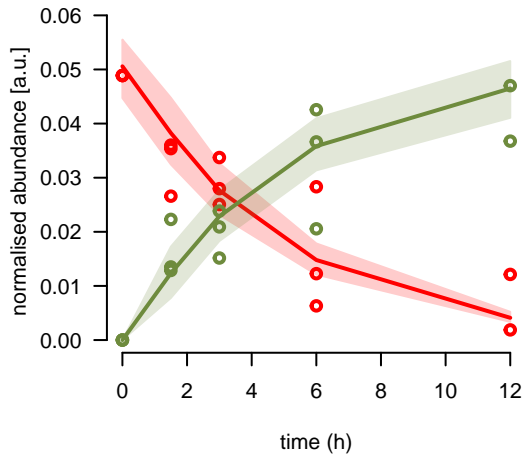**fraction: 6**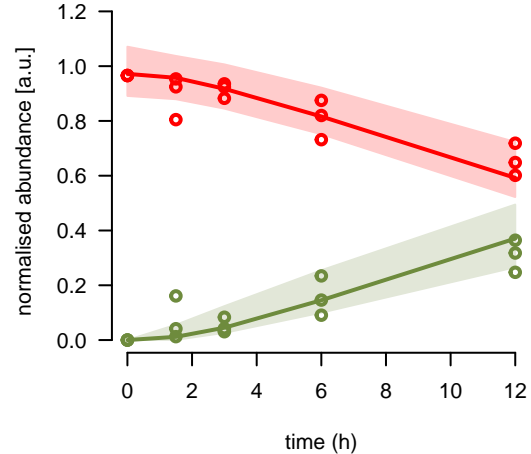**fraction: 7**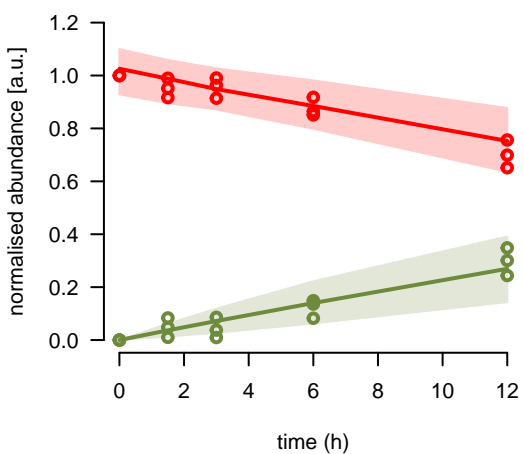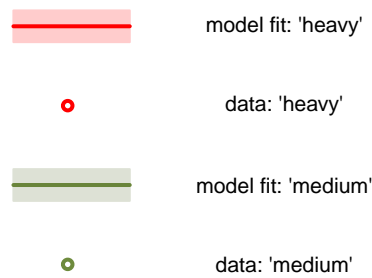**abundances**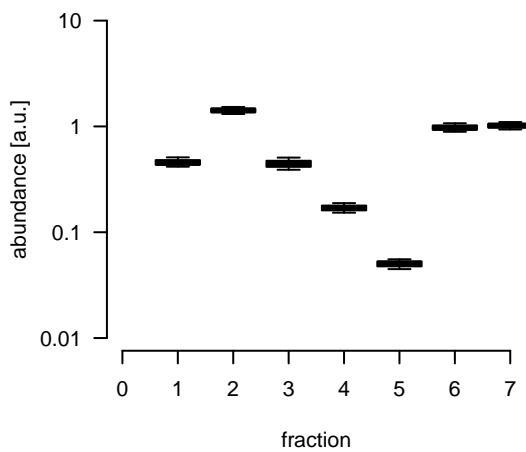**fluxes**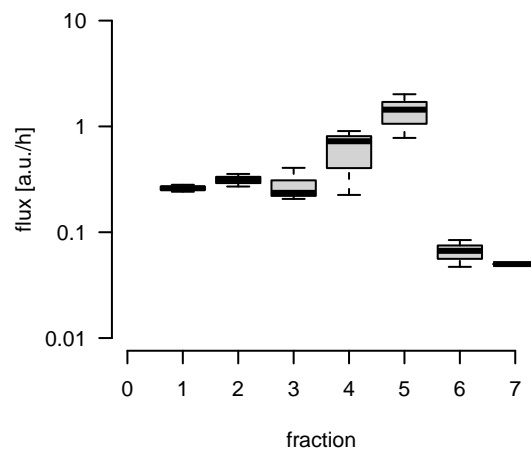

**uS3m fraction: 1**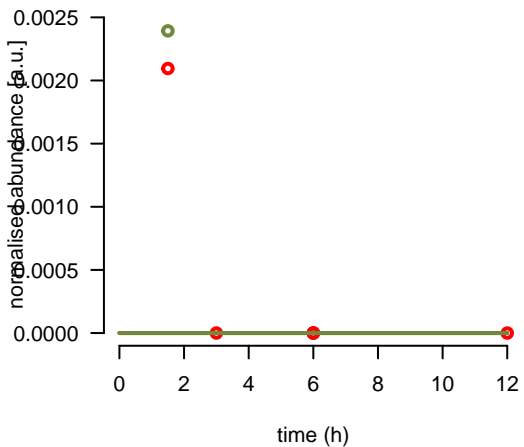**fraction: 2**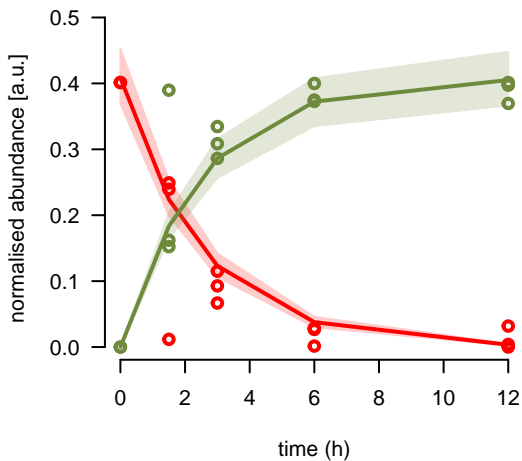**fraction: 3**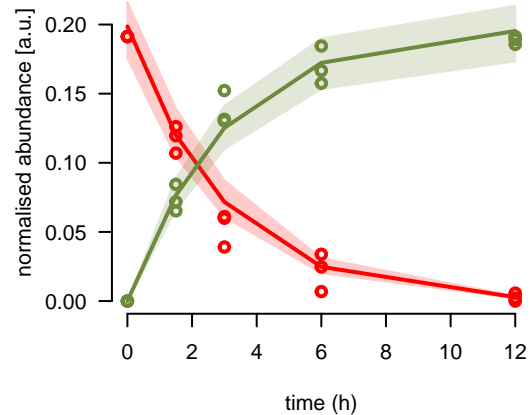**fraction: 4**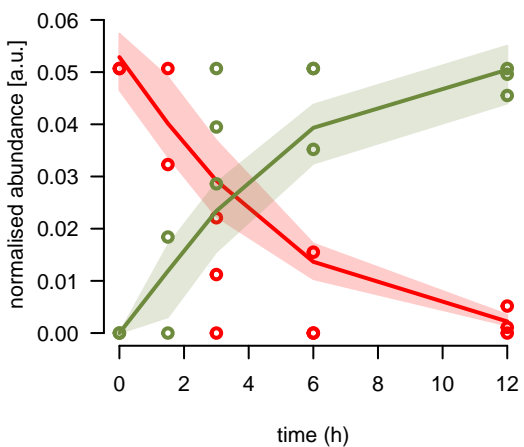**fraction: 5**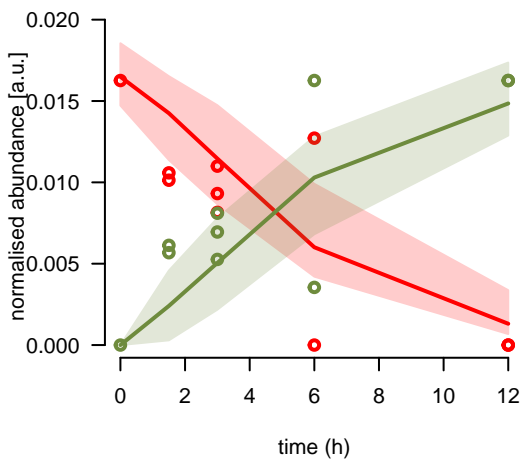**fraction: 6**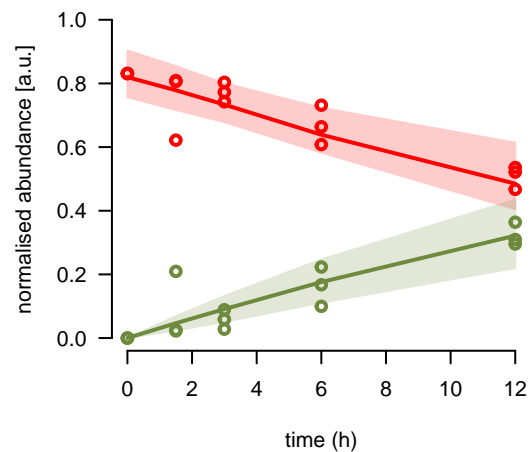**fraction: 7**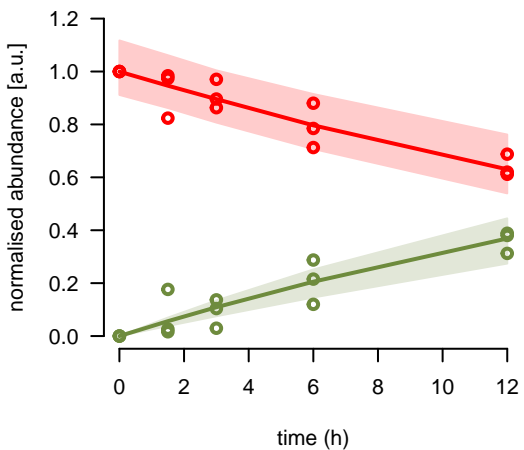**abundances**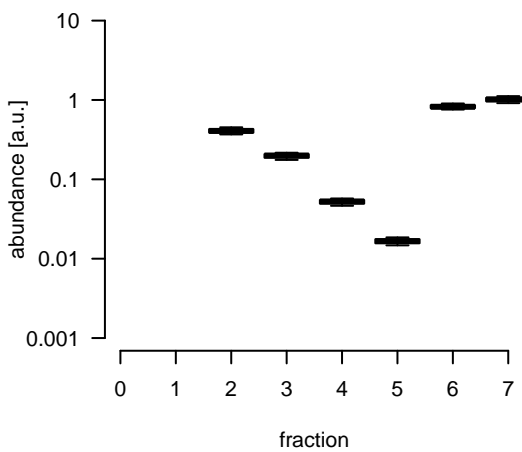**fluxes**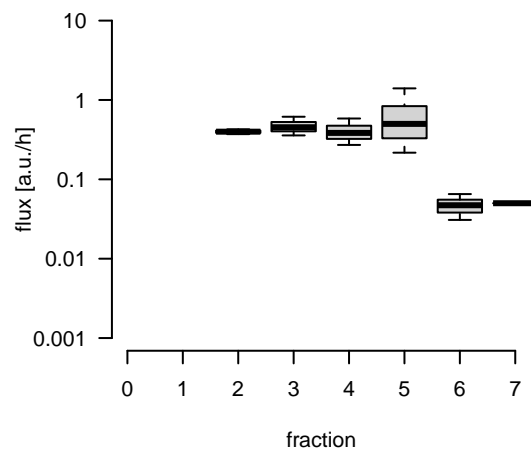

**uS5m fraction: 1**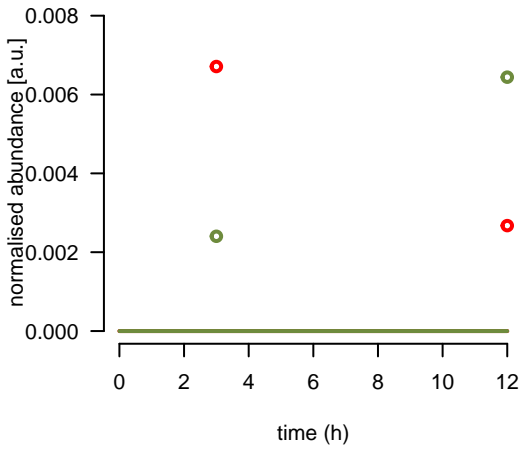**fraction: 2**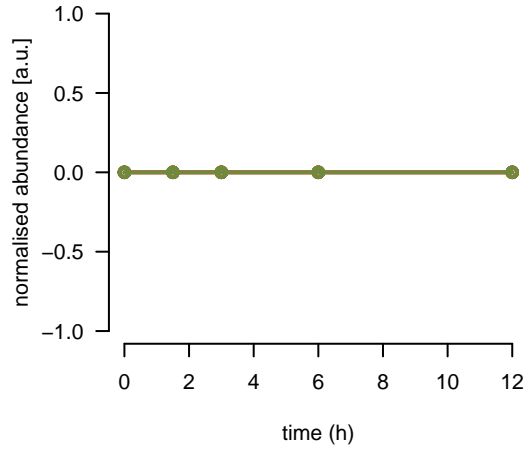**fraction: 3**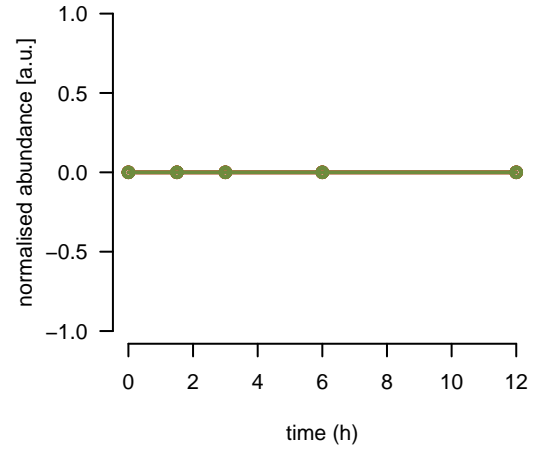**fraction: 4**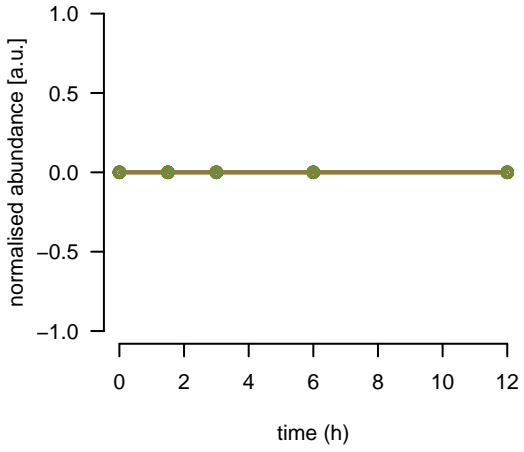**fraction: 5****fraction: 6**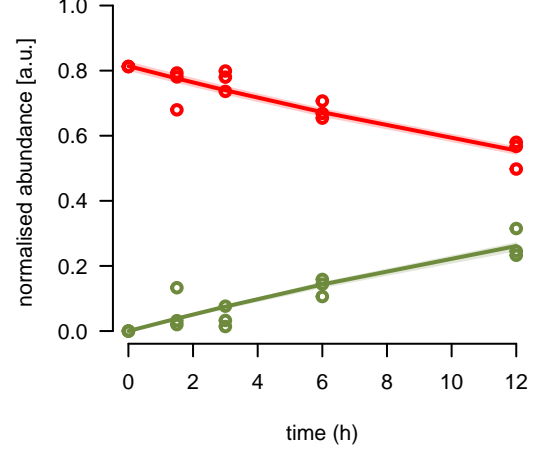**fraction: 7**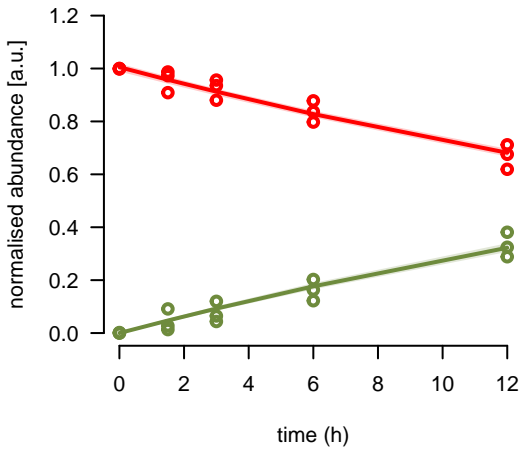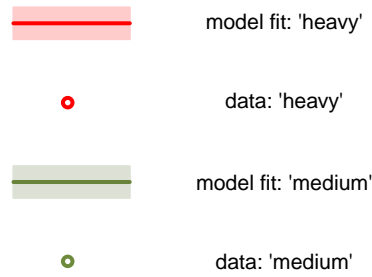**abundances**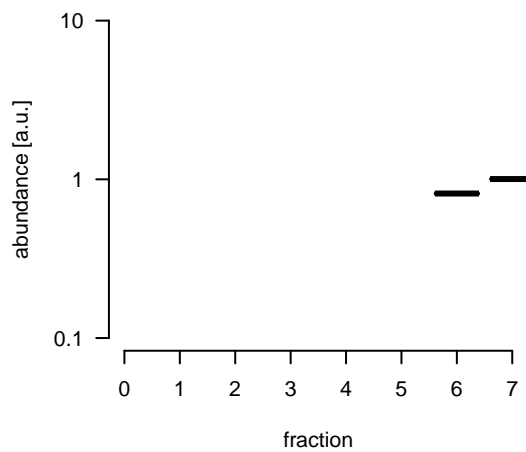**fluxes**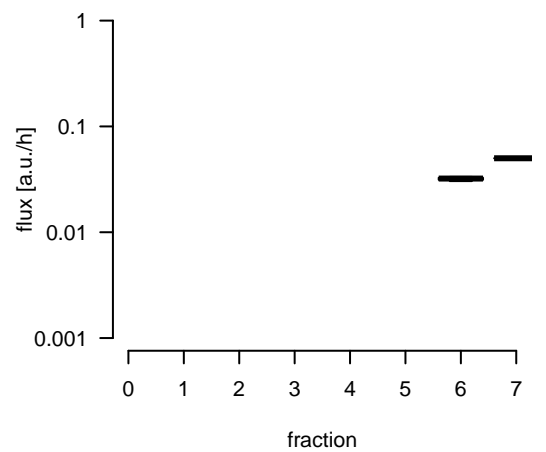

**bS6m fraction: 1**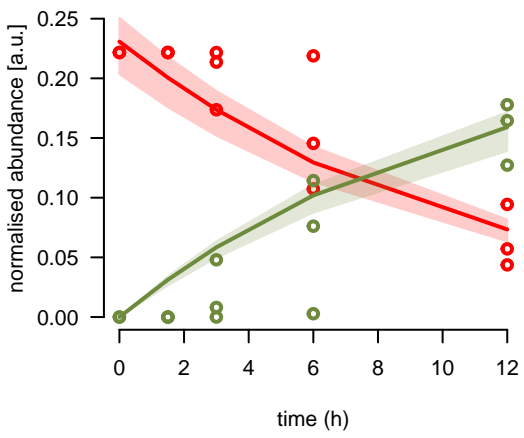**fraction: 2**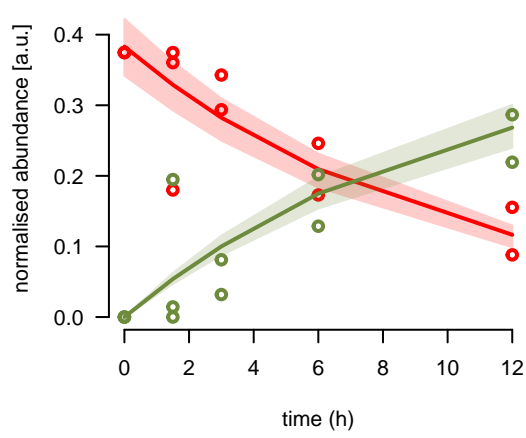**fraction: 3**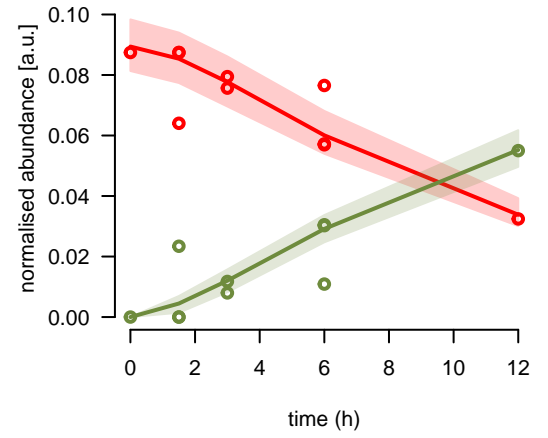**fraction: 4**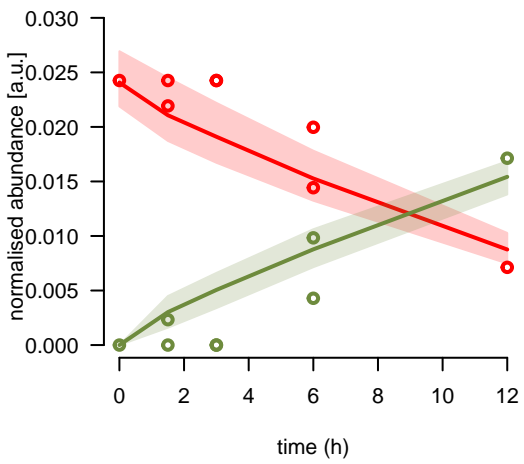**fraction: 5**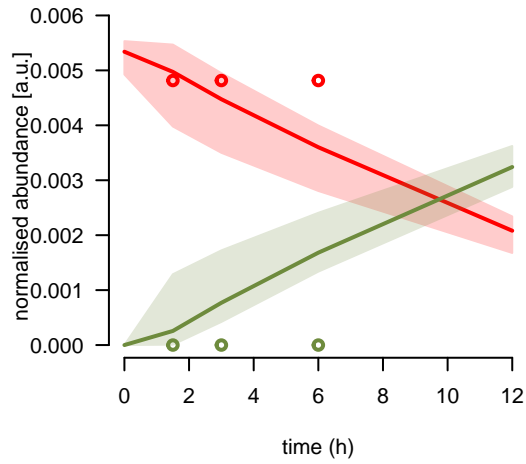**fraction: 6**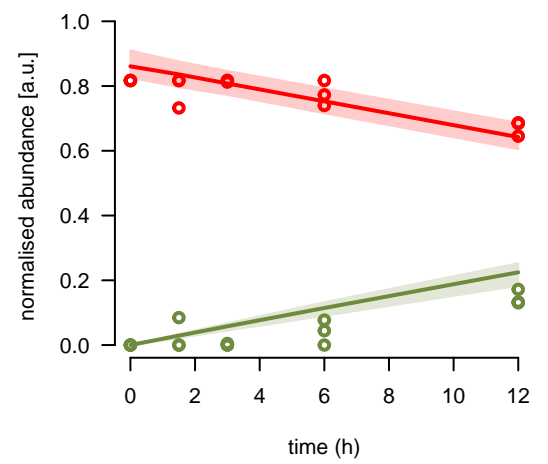**fraction: 7**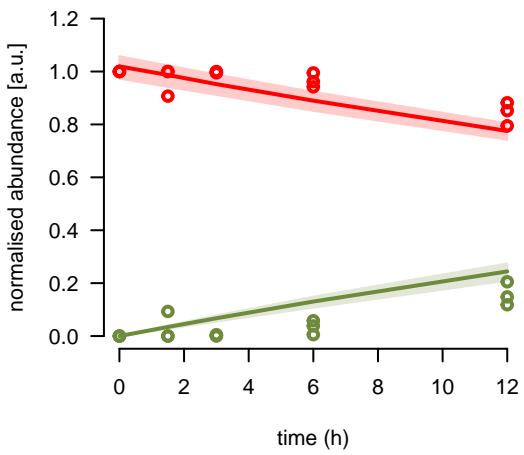**abundances**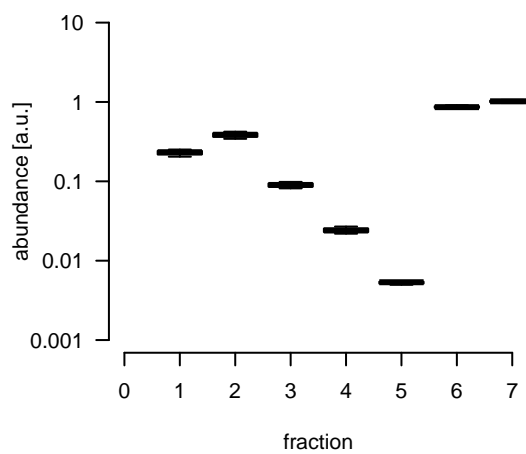**fluxes**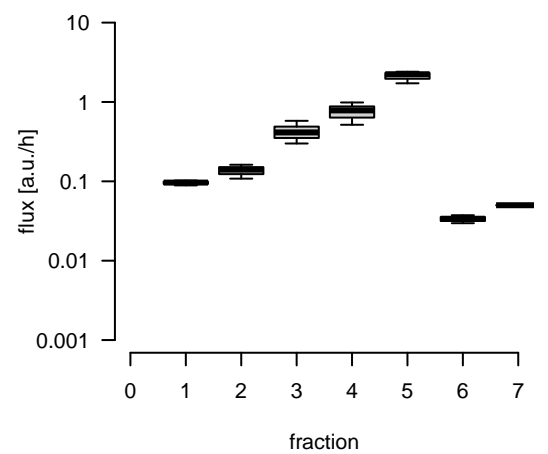

uS7m fraction: 1

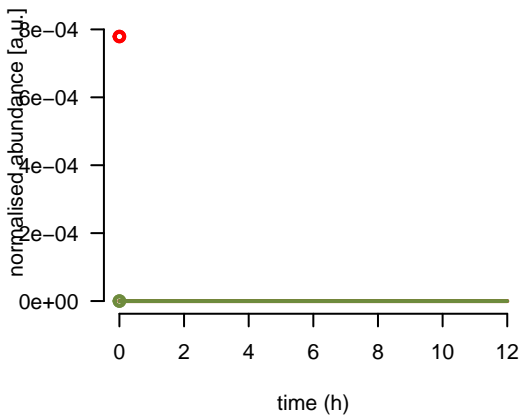

fraction: 2

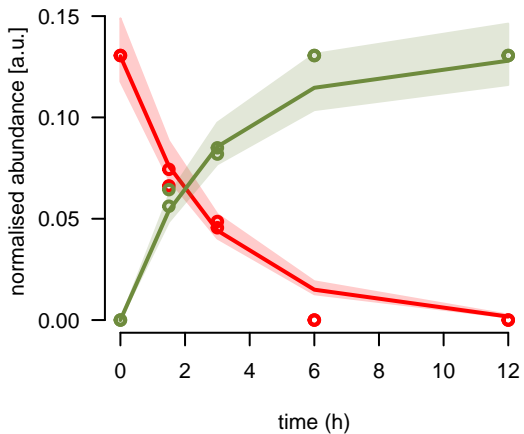

fraction: 3

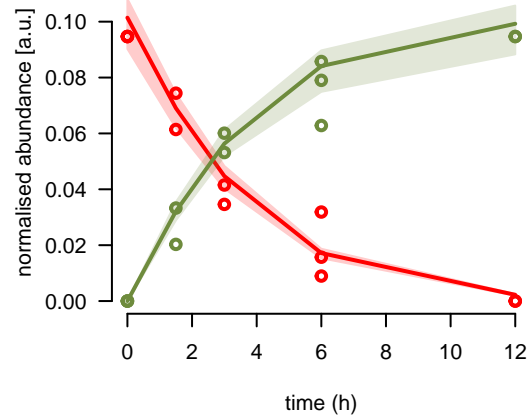

fraction: 4

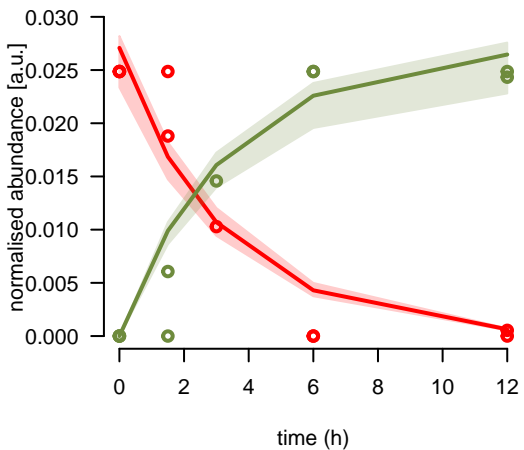

fraction: 5

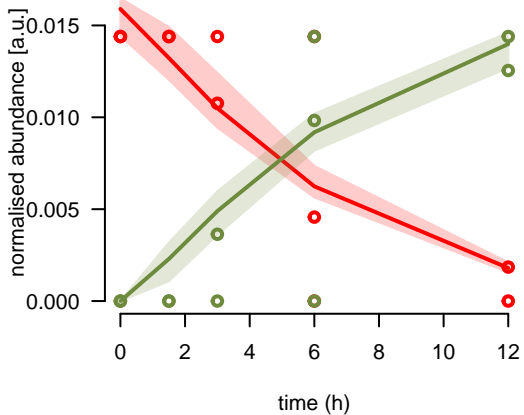

fraction: 6

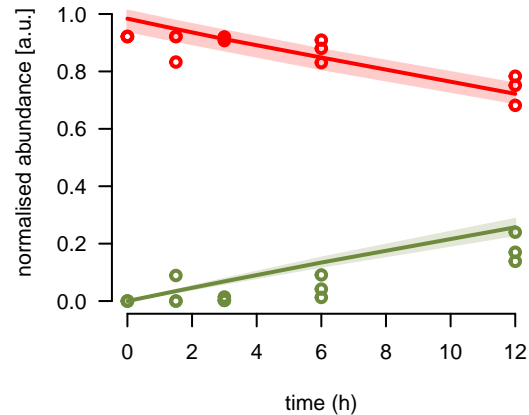

fraction: 7

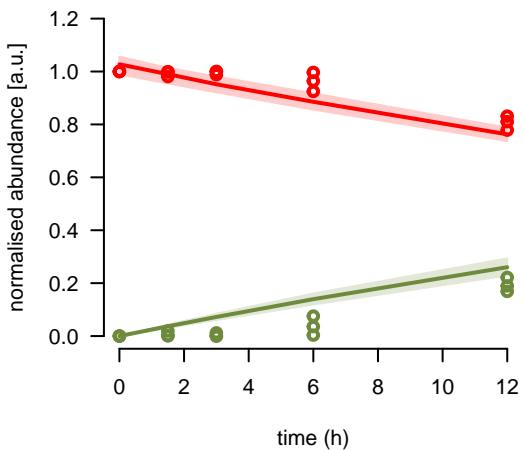

abundances

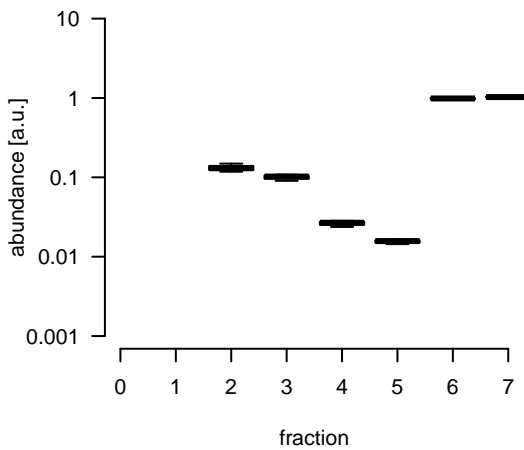

fluxes

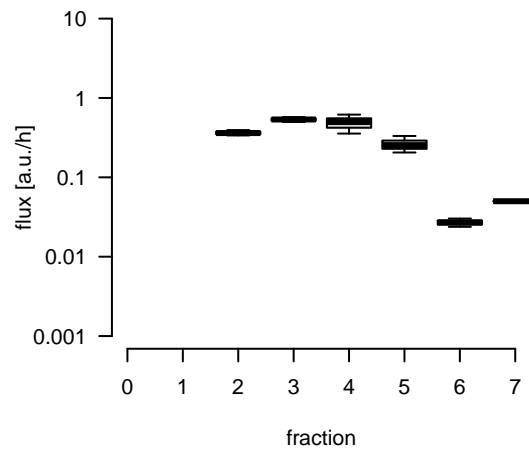

**uS9m fraction: 1**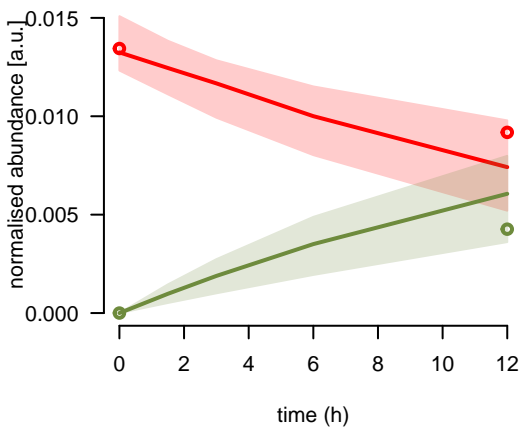**fraction: 2**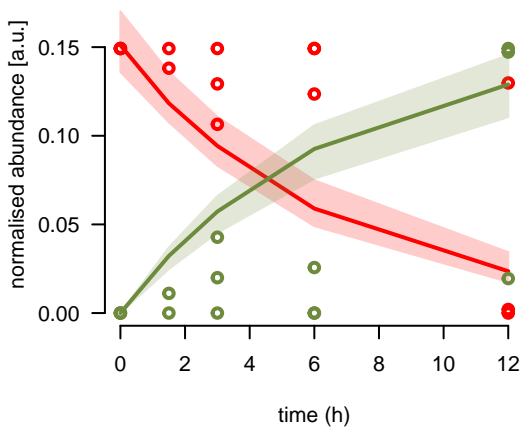**fraction: 3**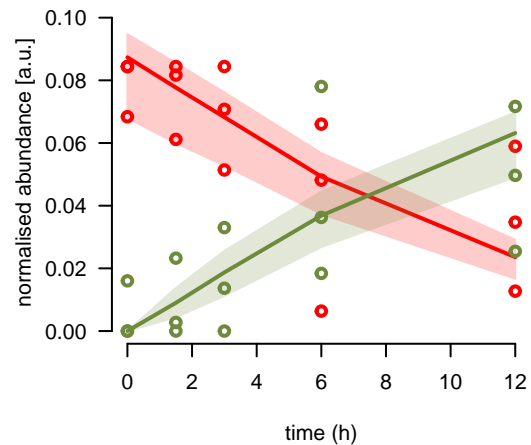**fraction: 4**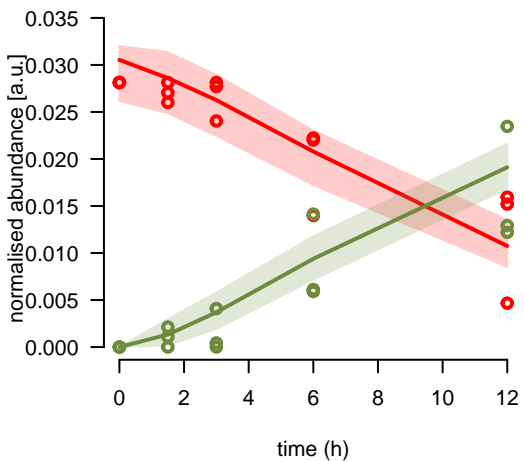**fraction: 5**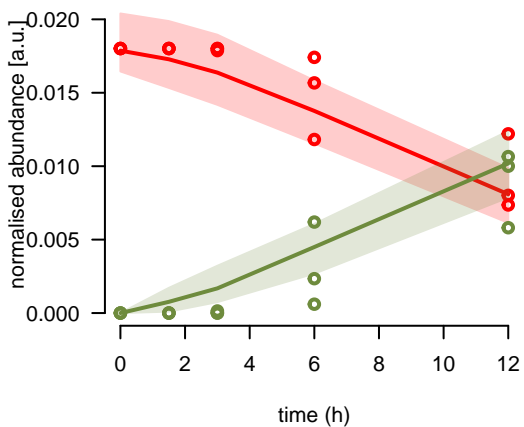**fraction: 6**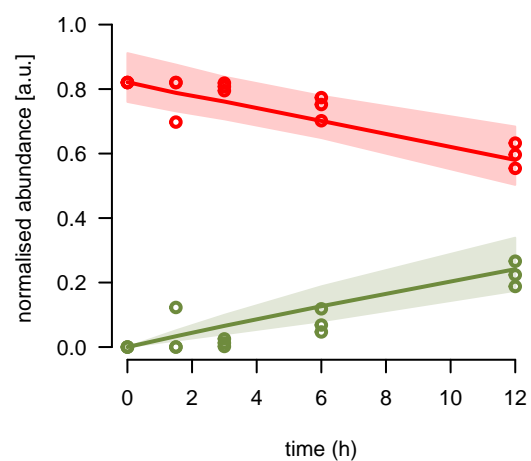**fraction: 7**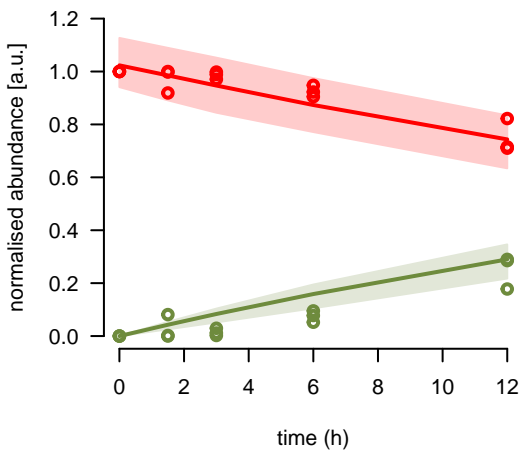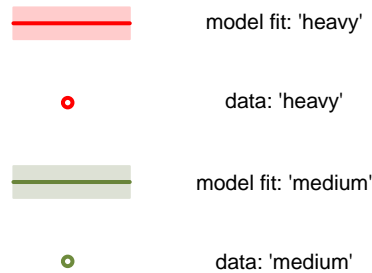**abundances**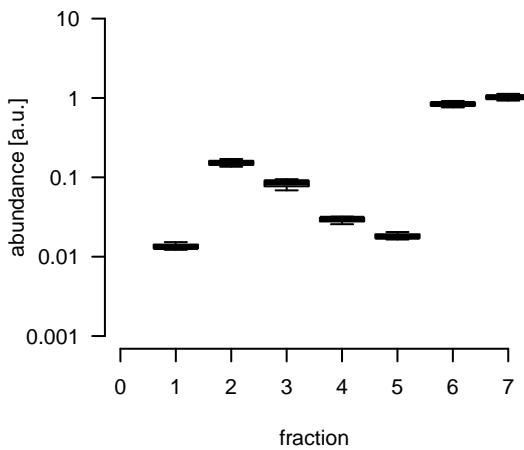**fluxes**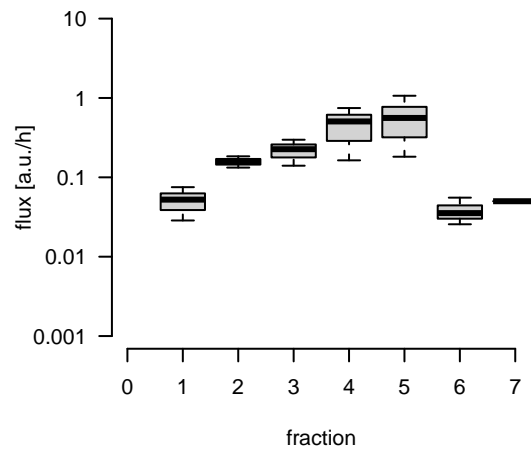

**uS10m fraction: 1**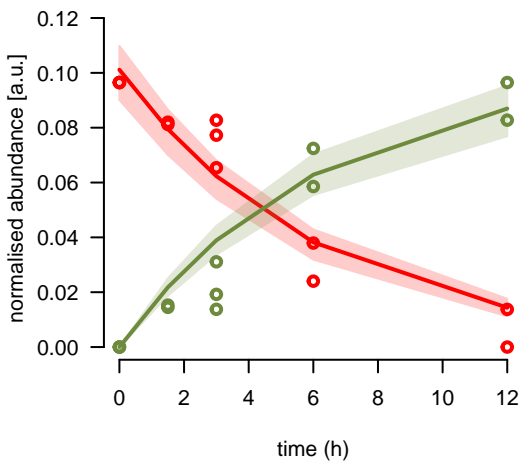**fraction: 2**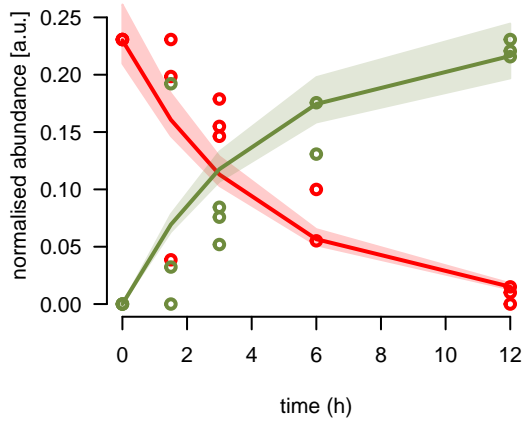**fraction: 3**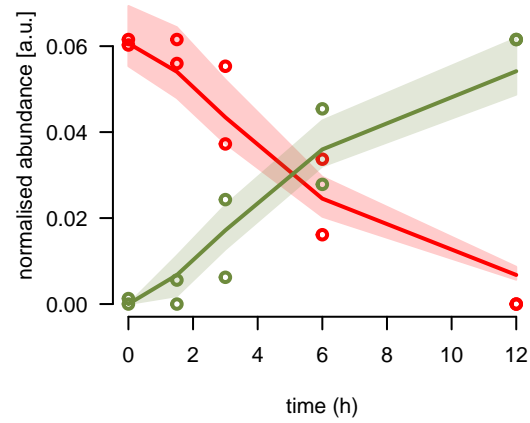**fraction: 4**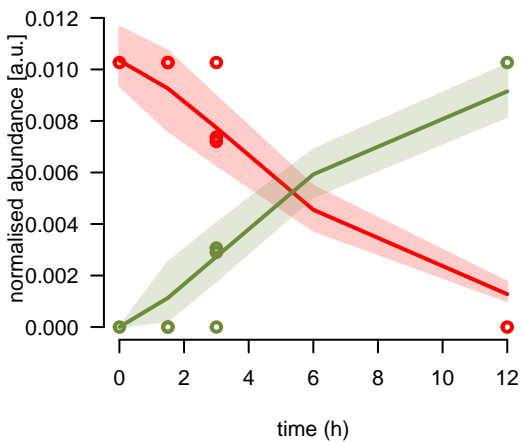**fraction: 5**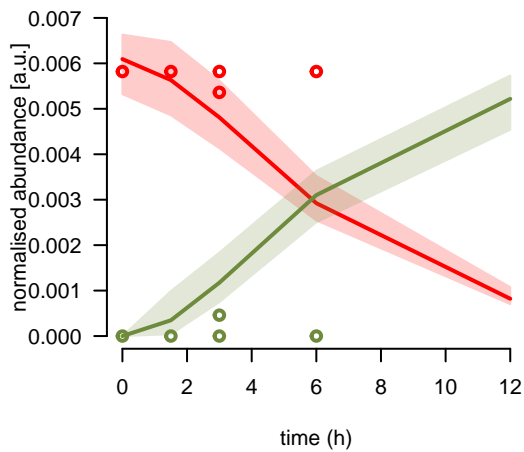**fraction: 6**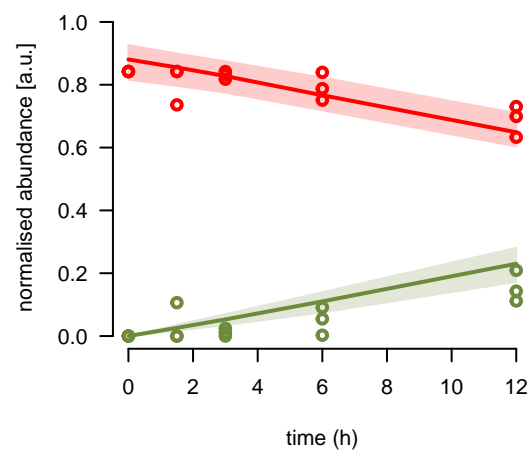**fraction: 7**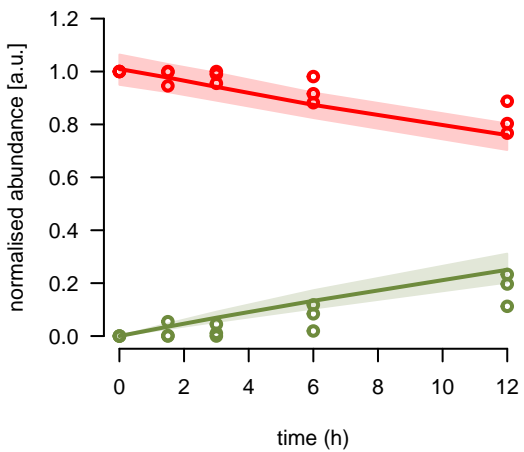**abundances**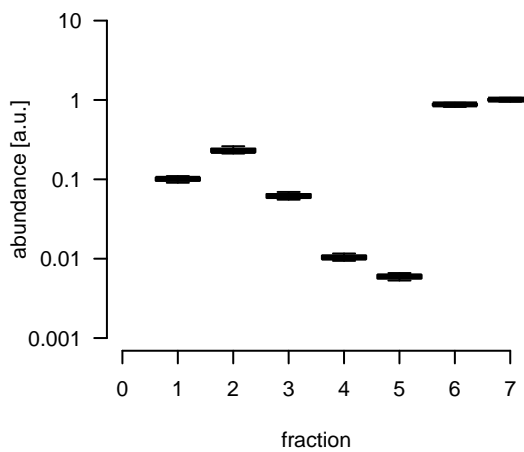**fluxes**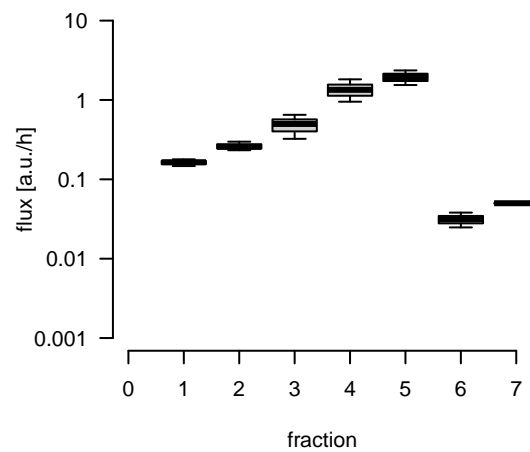



**uS11m fraction: 1**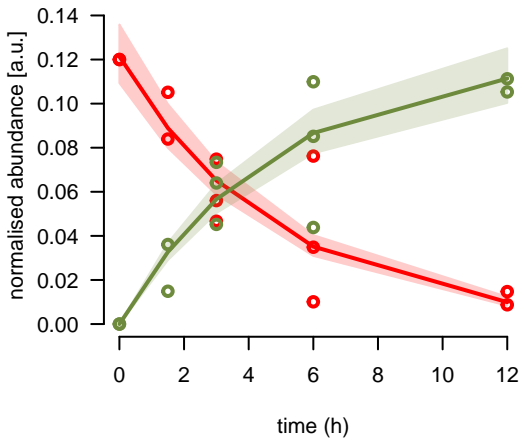**fraction: 2**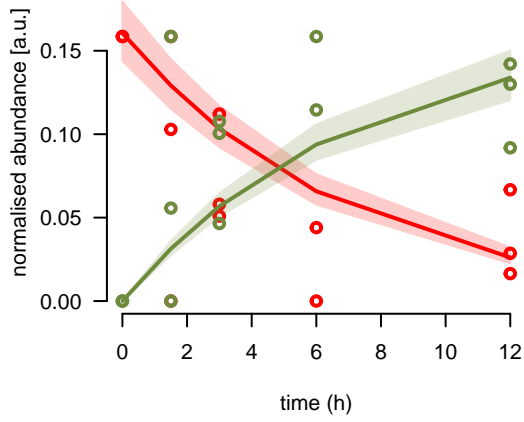**fraction: 3**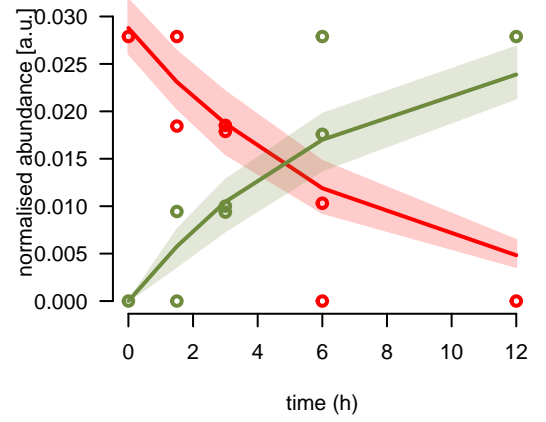**fraction: 4**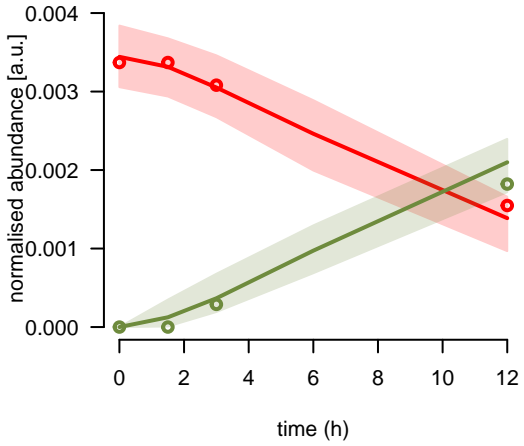**fraction: 5**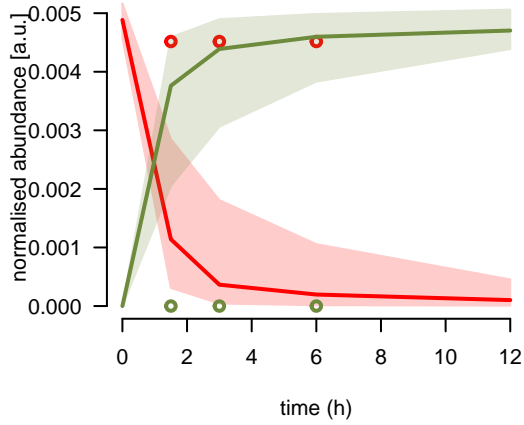**fraction: 6**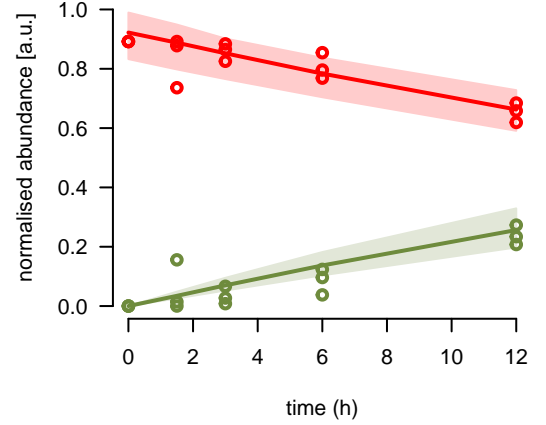**fraction: 7**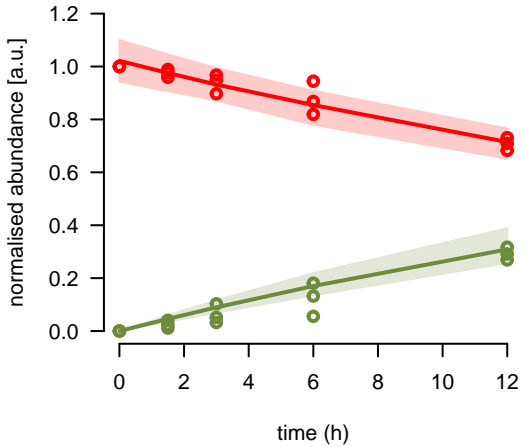**abundances**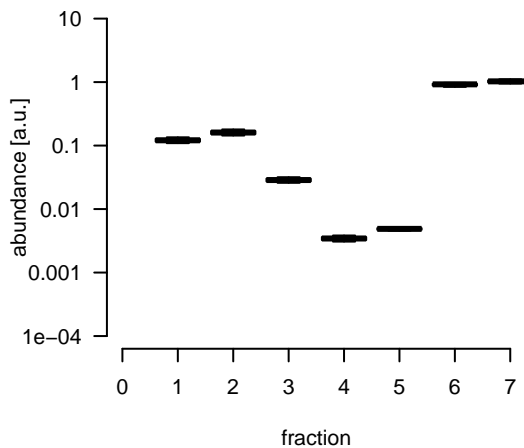**fluxes**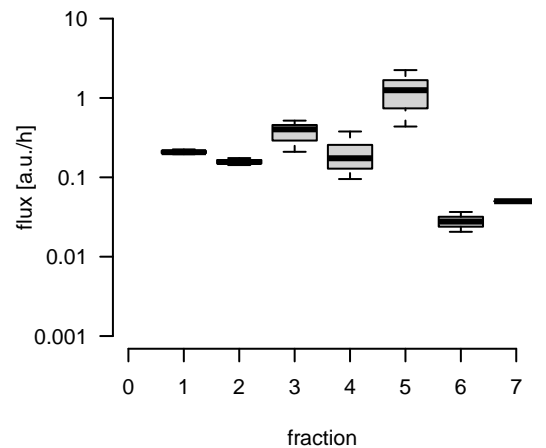

**uS12m fraction: 1**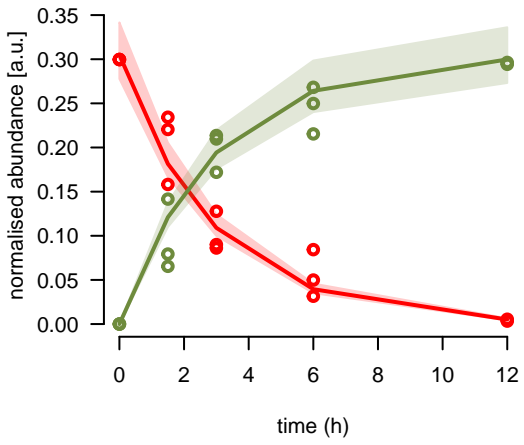**fraction: 2**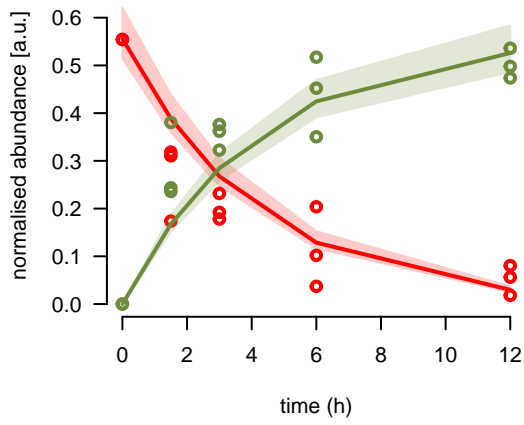**fraction: 3**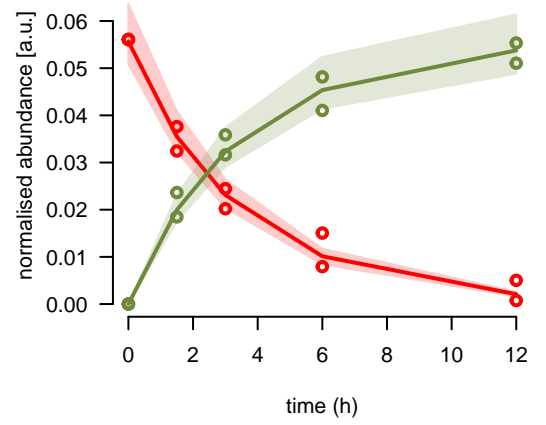**fraction: 4**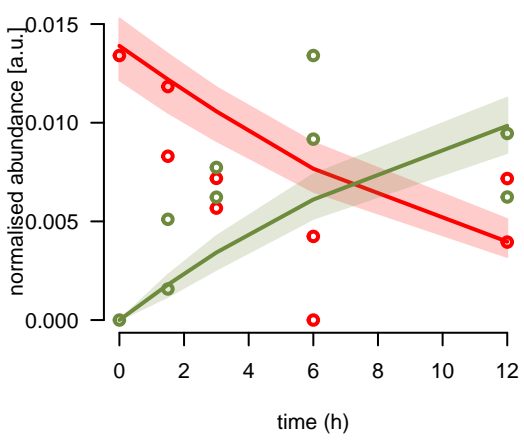**fraction: 5**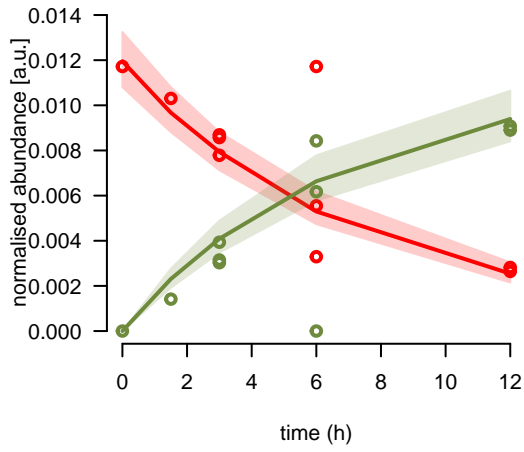**fraction: 6**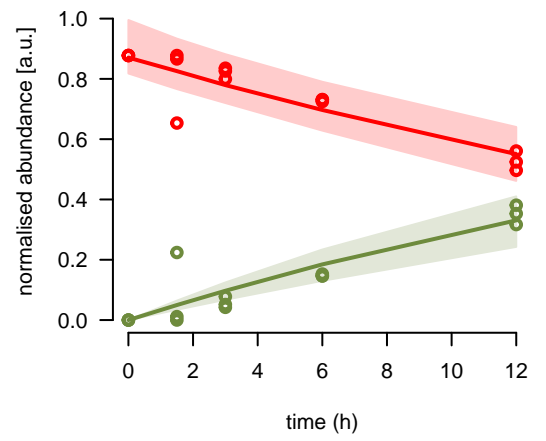**fraction: 7**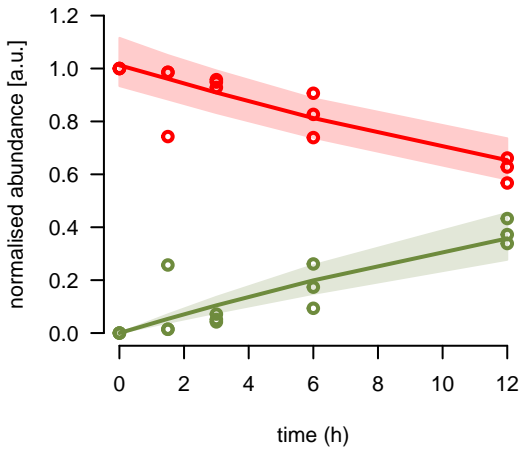**abundances**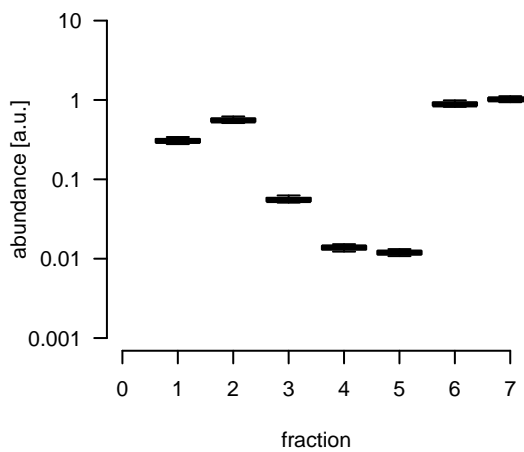**fluxes**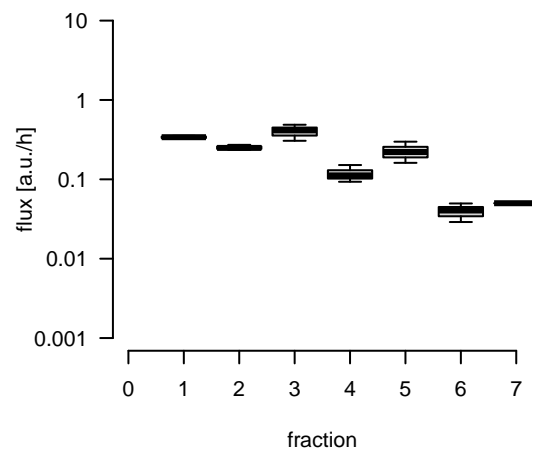

**uS14m fraction: 1**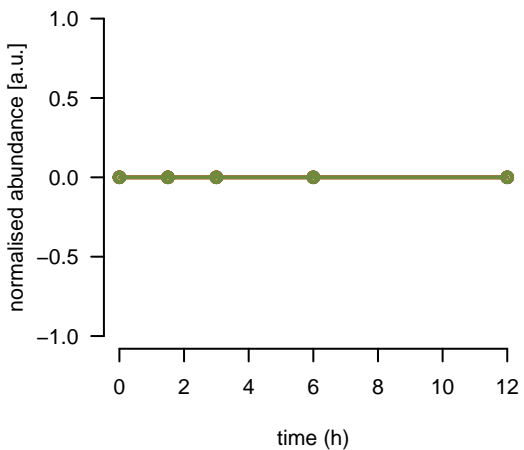**fraction: 2**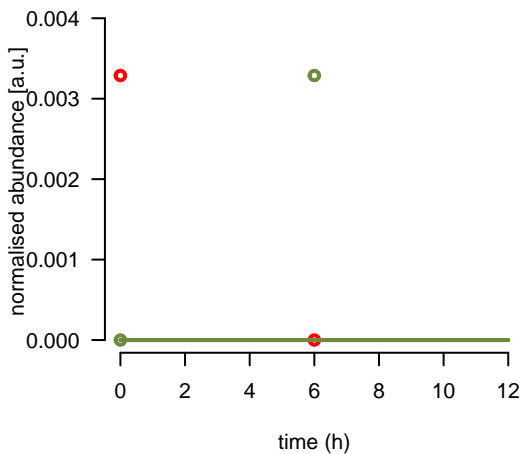**fraction: 3**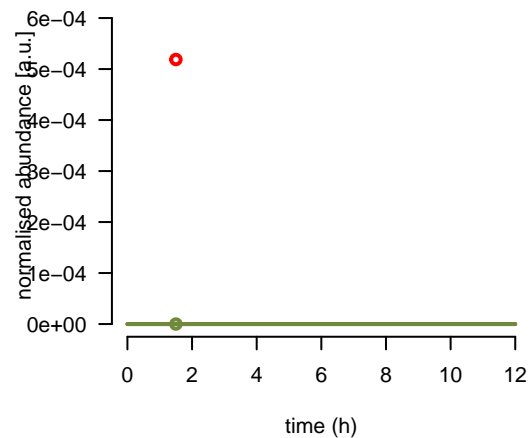**fraction: 4**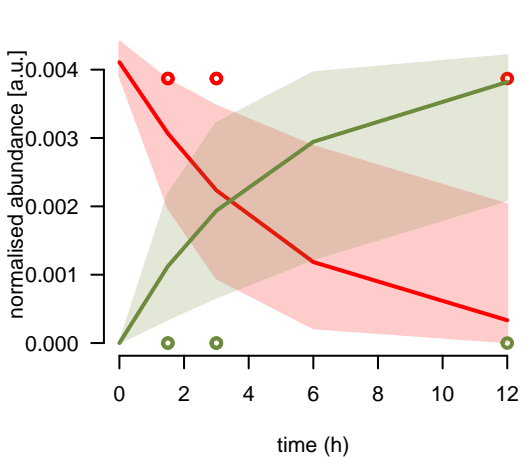**fraction: 5**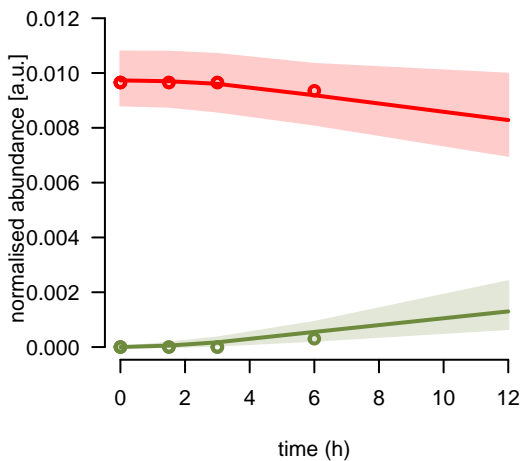**fraction: 6**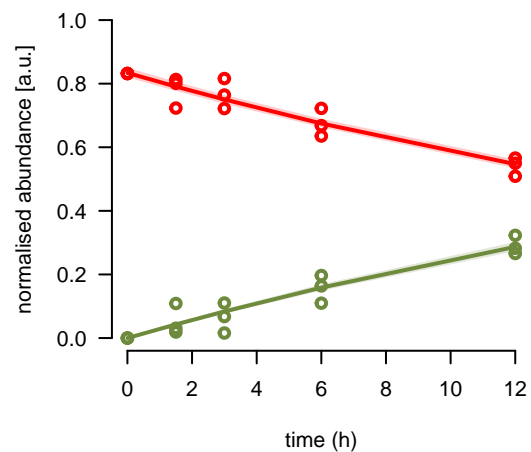**fraction: 7**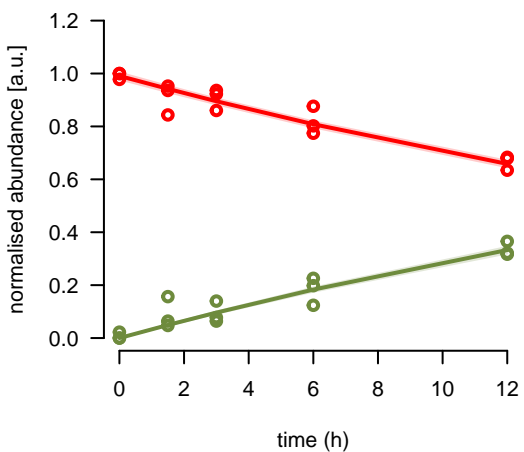**abundances**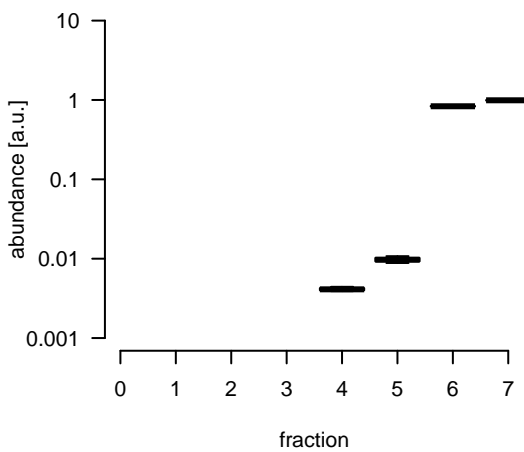**fluxes**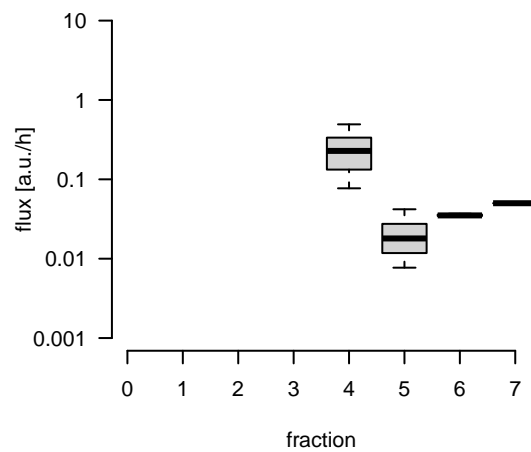

**uS15m fraction: 1****fraction: 2**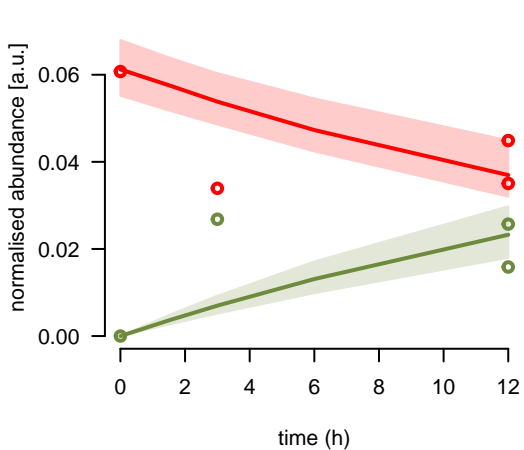**fraction: 3**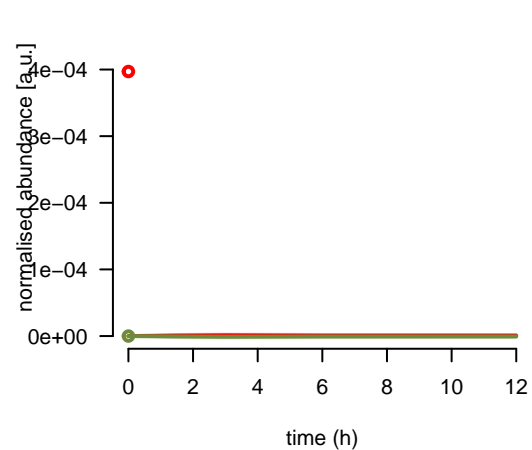**fraction: 4**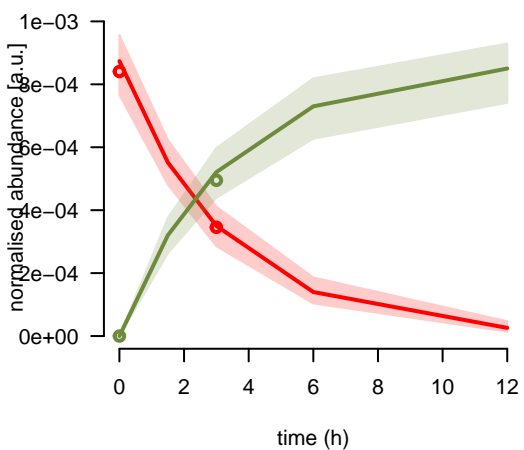**fraction: 5**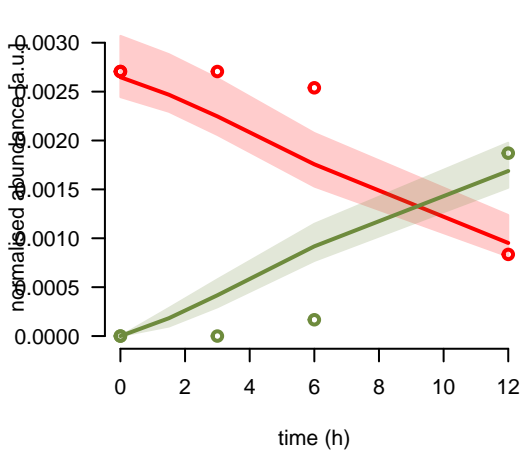**fraction: 6**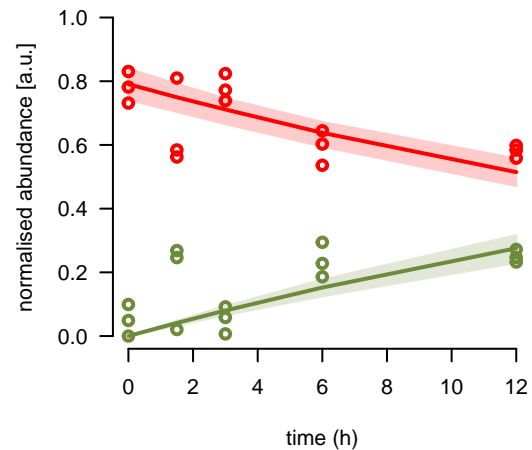**fraction: 7**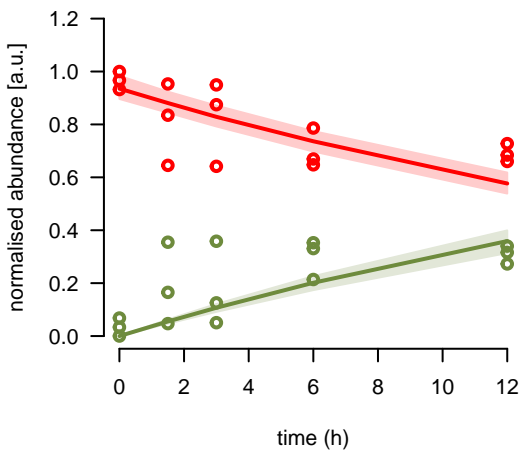**abundances**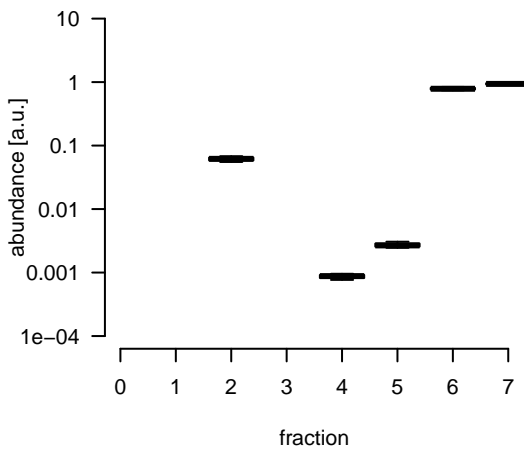**fluxes**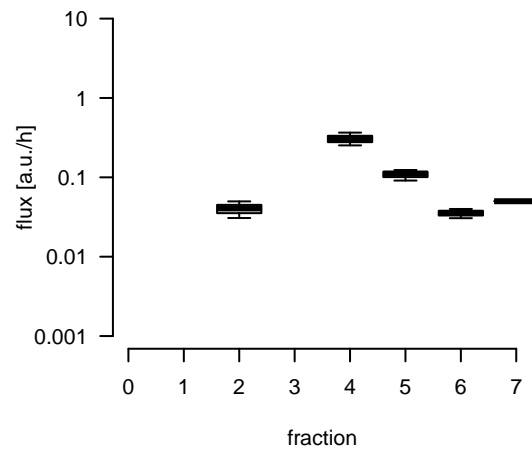

**bs16m fraction: 1**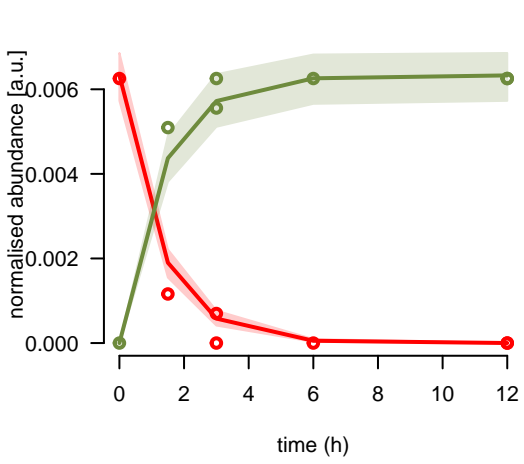**fraction: 2**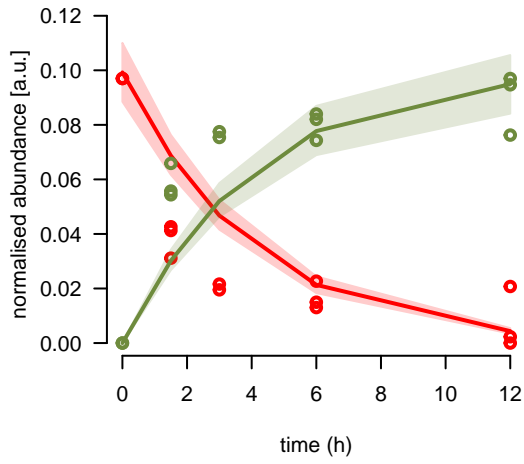**fraction: 3**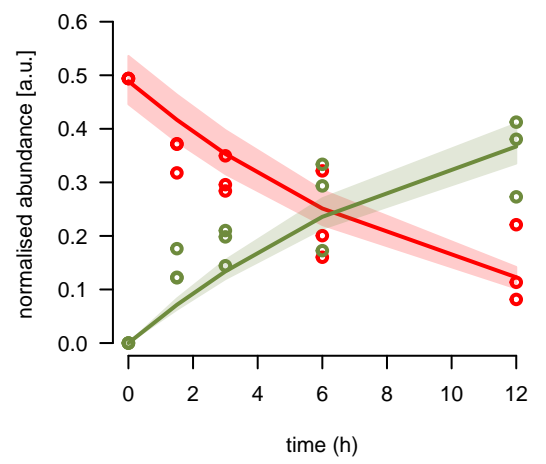**fraction: 4**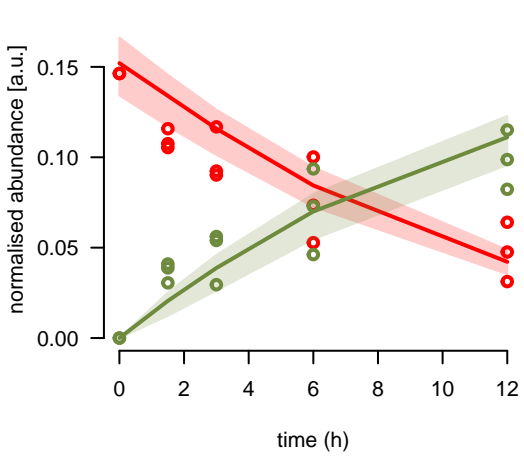**fraction: 5**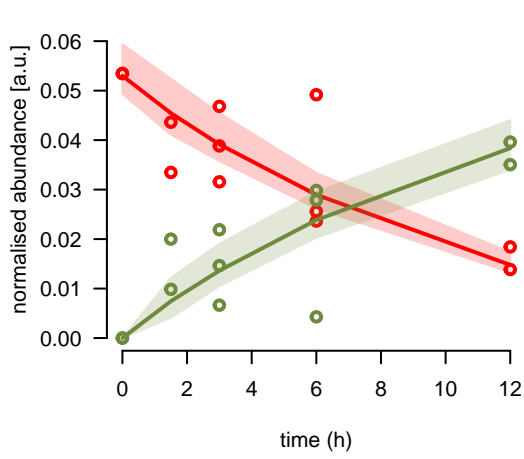**fraction: 6**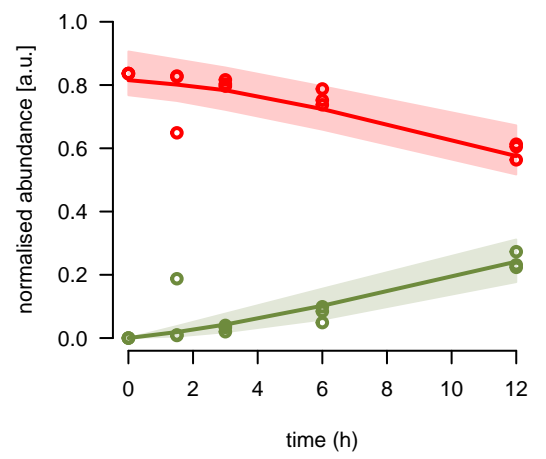**fraction: 7**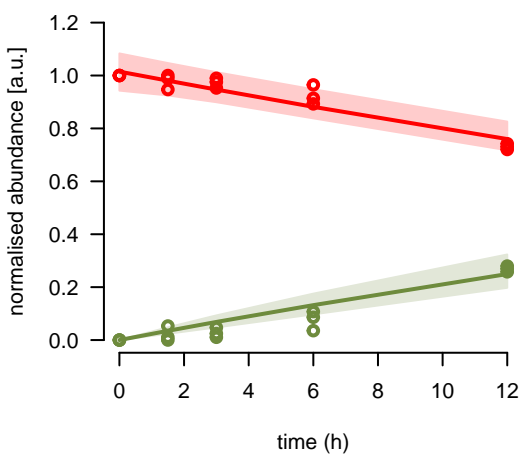**abundances**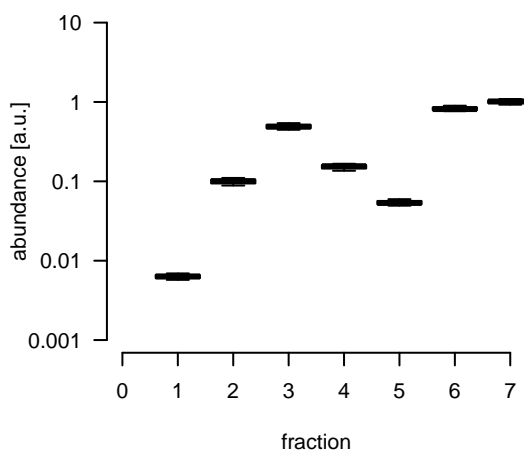**fluxes**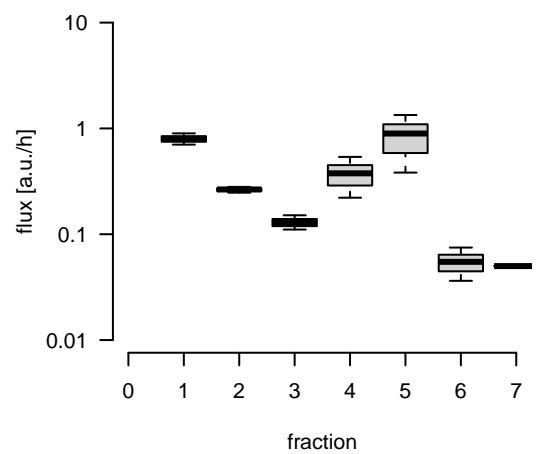

**uS17m fraction: 1****fraction: 2**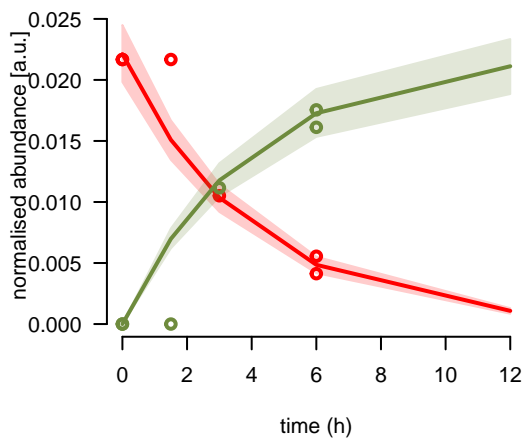**fraction: 3**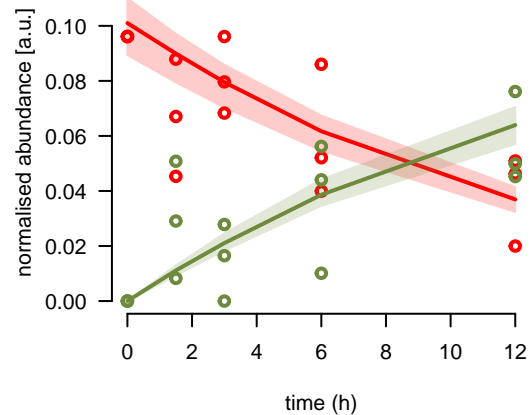**fraction: 4**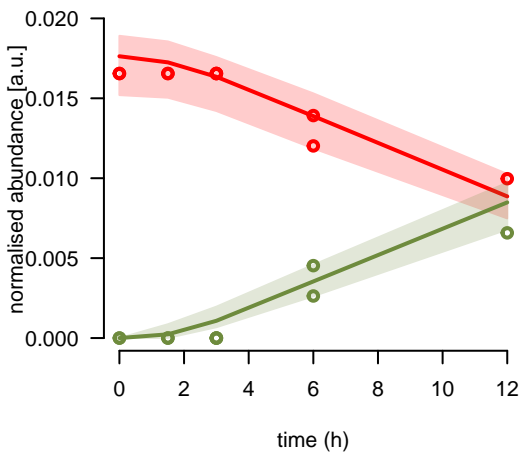**fraction: 5**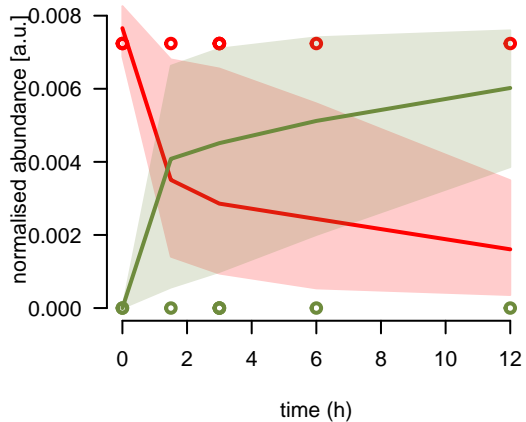**fraction: 6**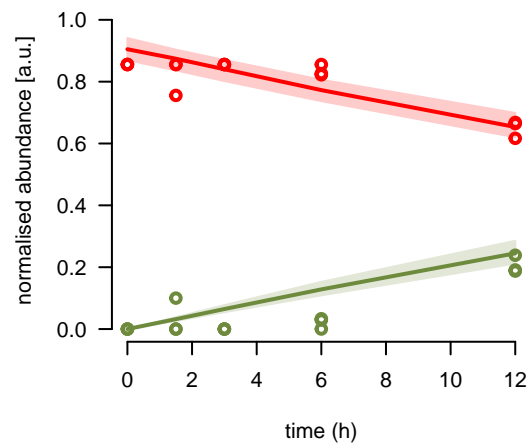**fraction: 7**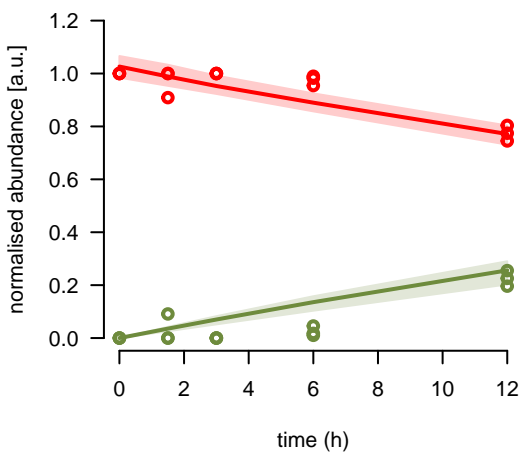**abundances**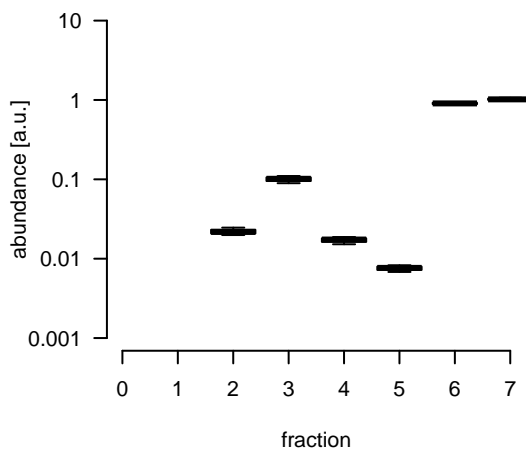**fluxes**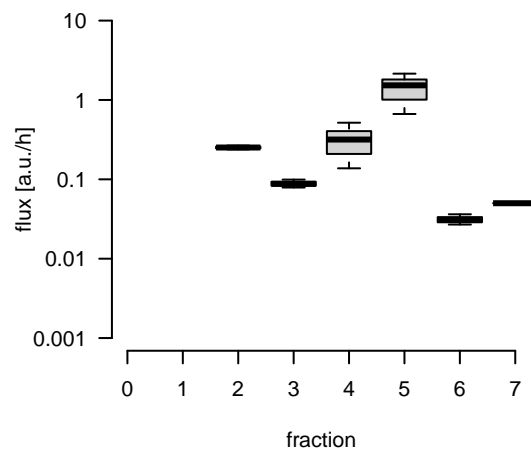

**bS18m fraction: 1**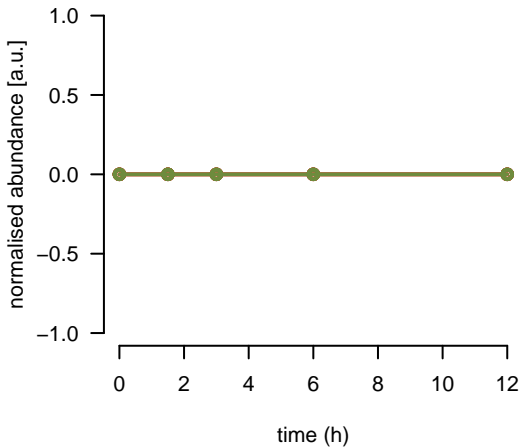**fraction: 2**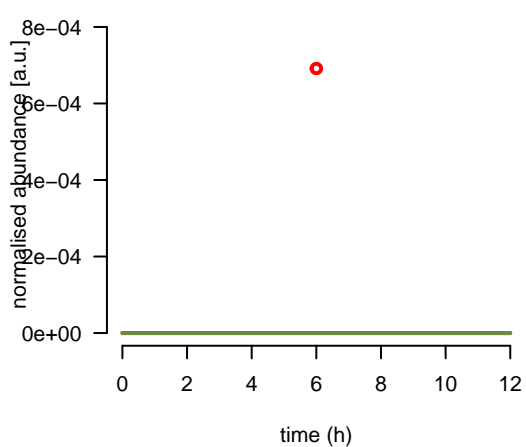**fraction: 3**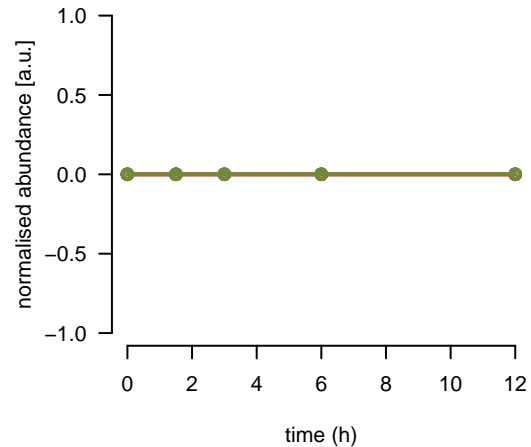**fraction: 4**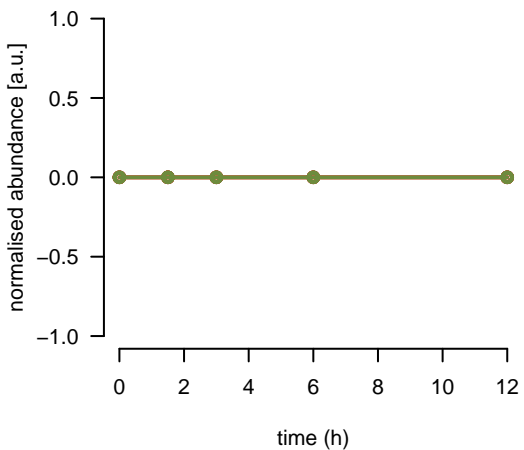**fraction: 5**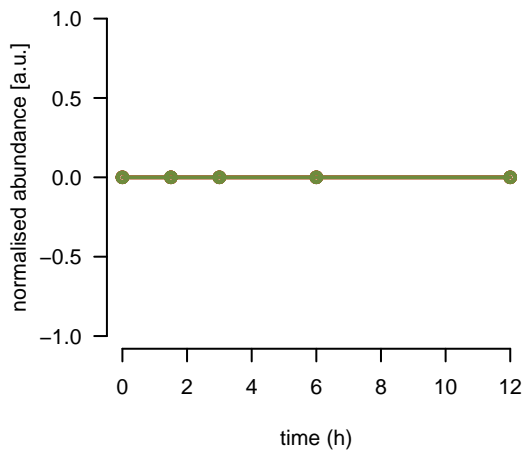**fraction: 6**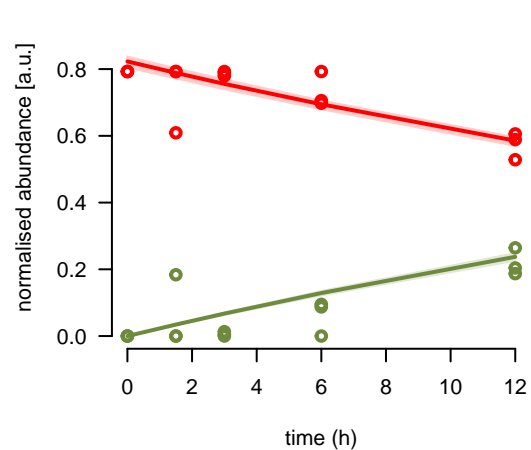**fraction: 7**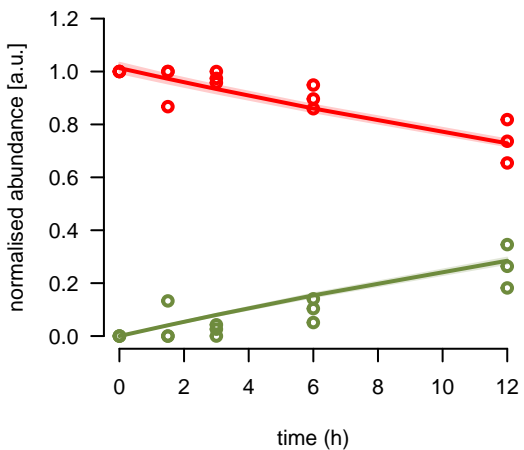**abundances**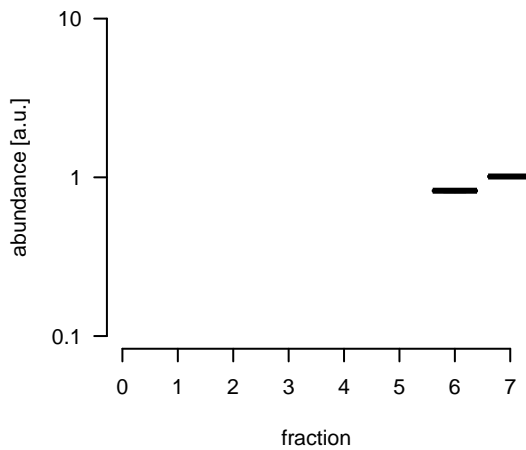**fluxes**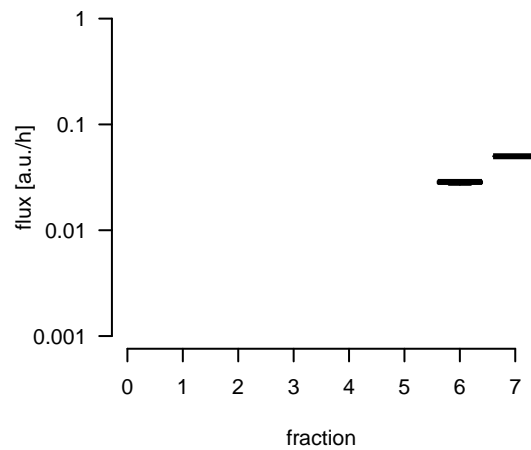

**bs21m fraction: 1****fraction: 2**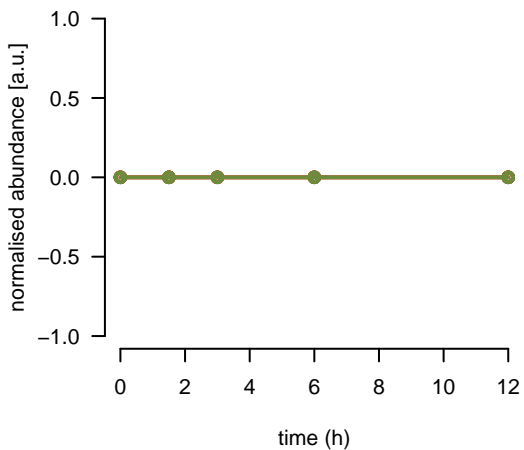**fraction: 3**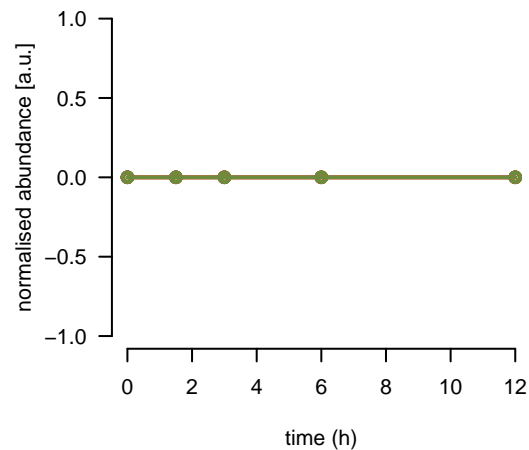**fraction: 4**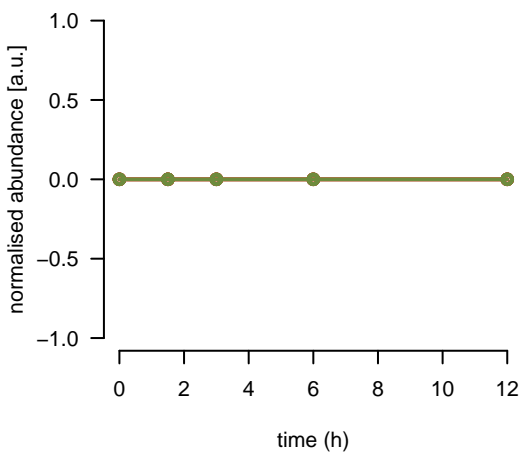**fraction: 5**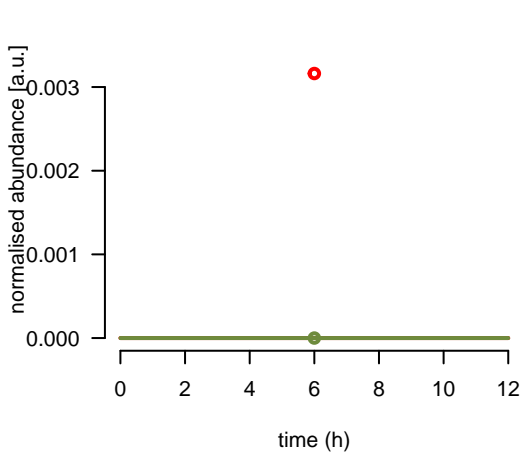**fraction: 6**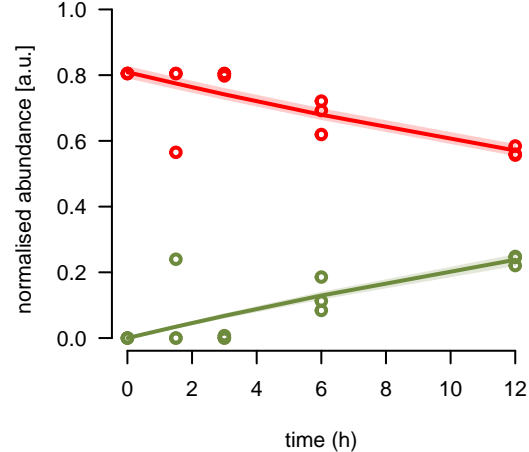**fraction: 7**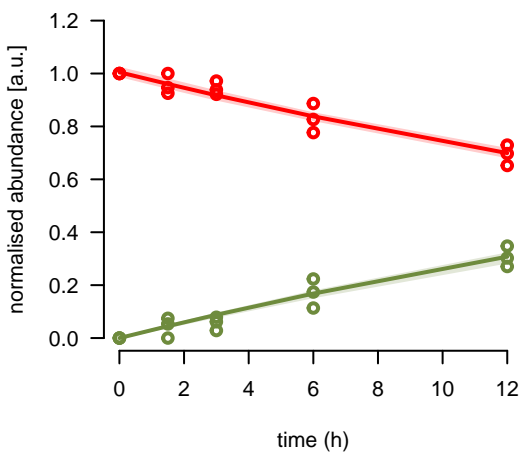**abundances**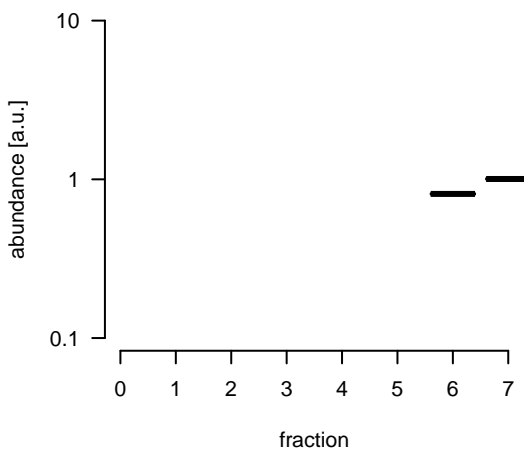**fluxes**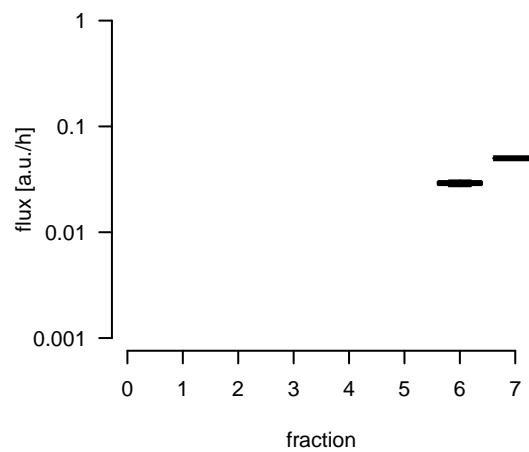



**mS22 fraction: 1**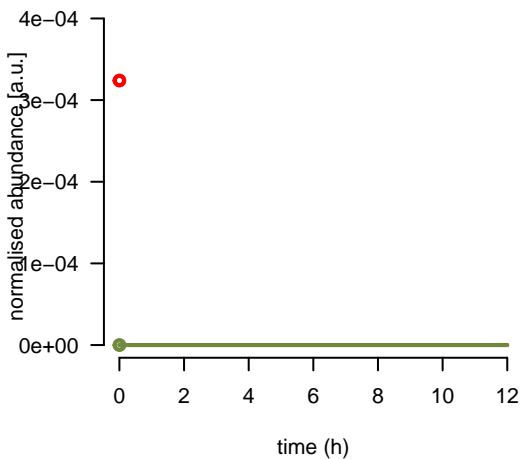**fraction: 2**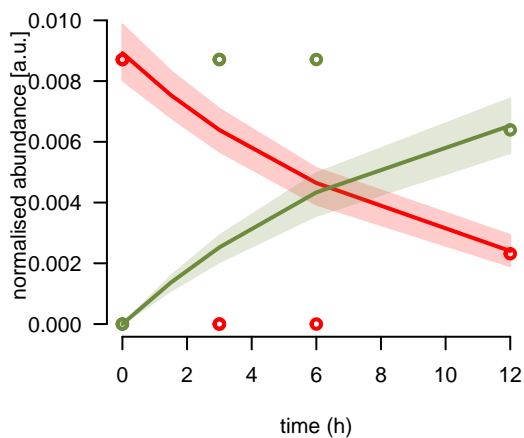**fraction: 3**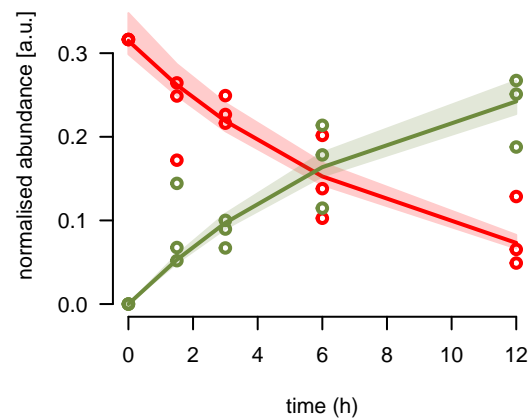**fraction: 4**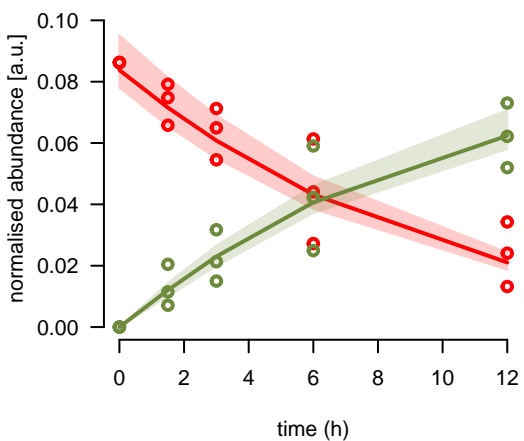**fraction: 5**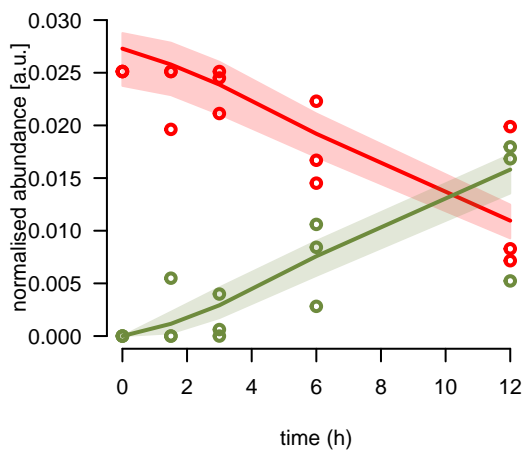**fraction: 6**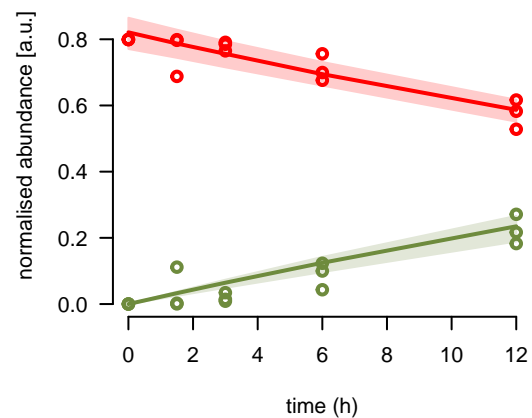**fraction: 7**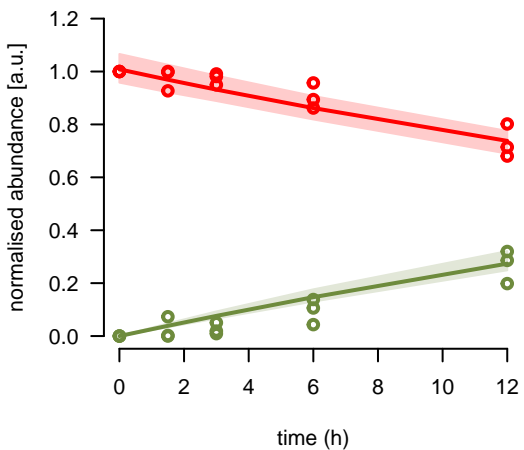**abundances**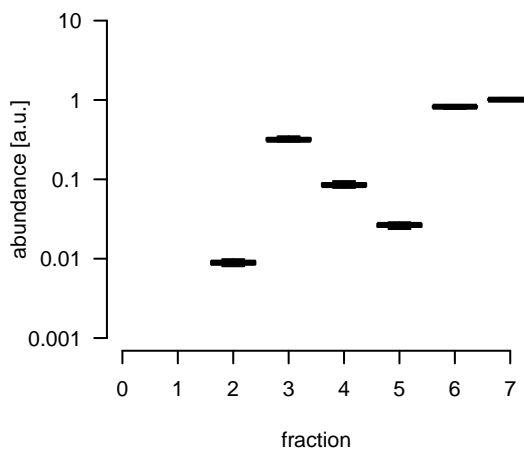**fluxes**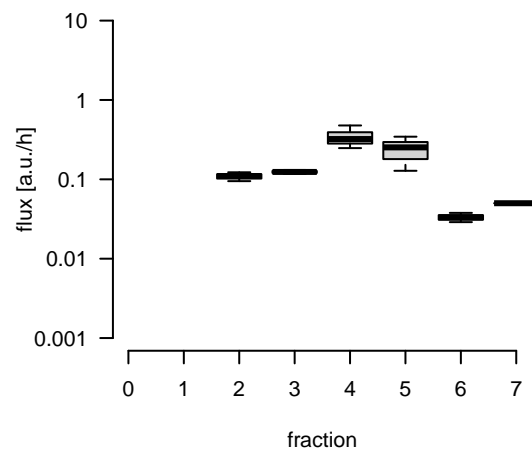

**mS23 fraction: 1**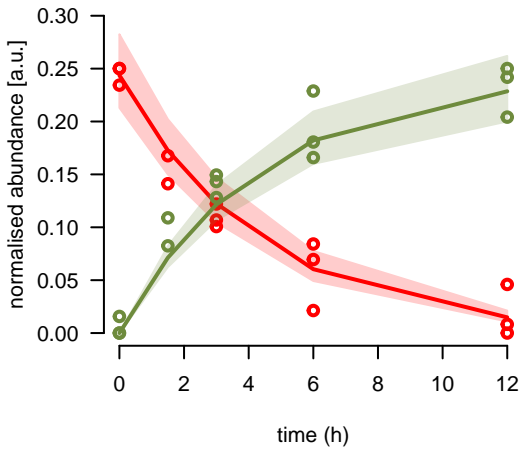**fraction: 2**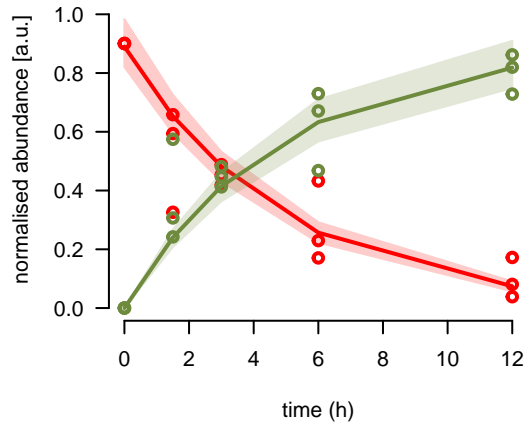**fraction: 3**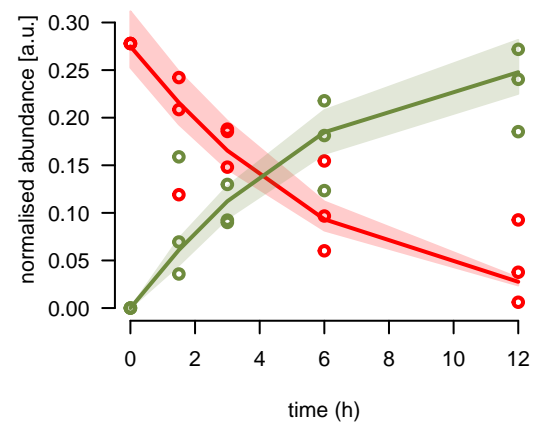**fraction: 4**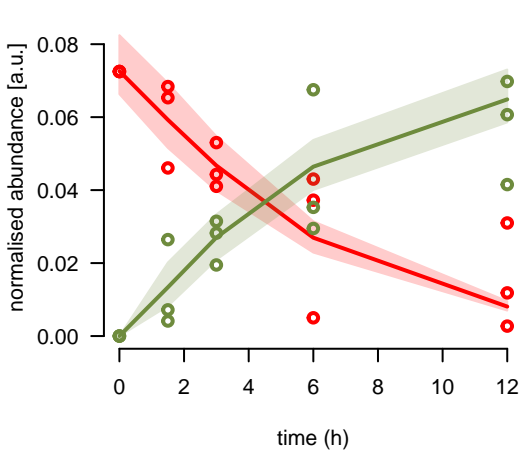**fraction: 5**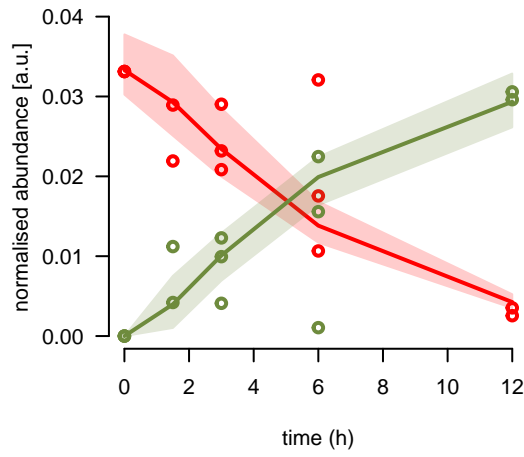**fraction: 6**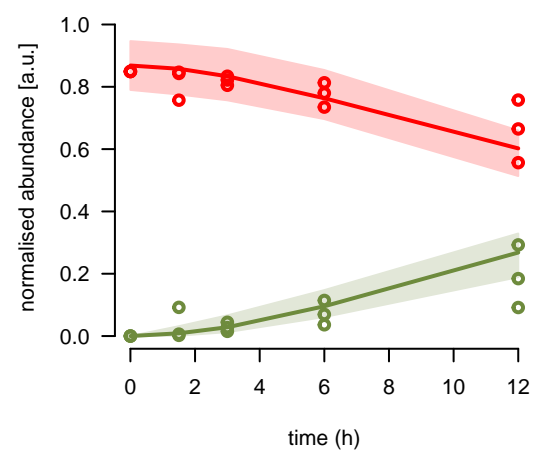**fraction: 7**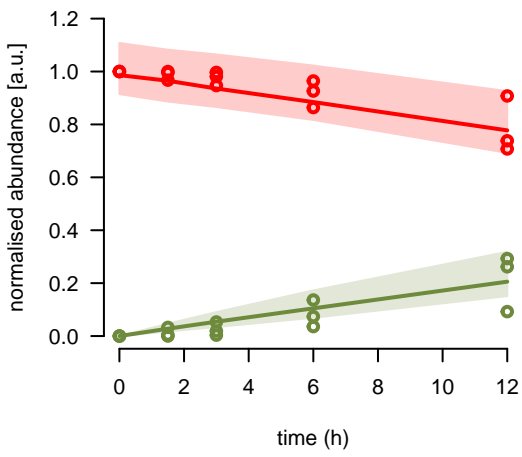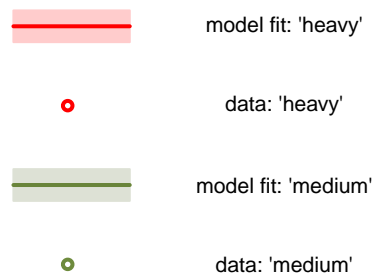**abundances**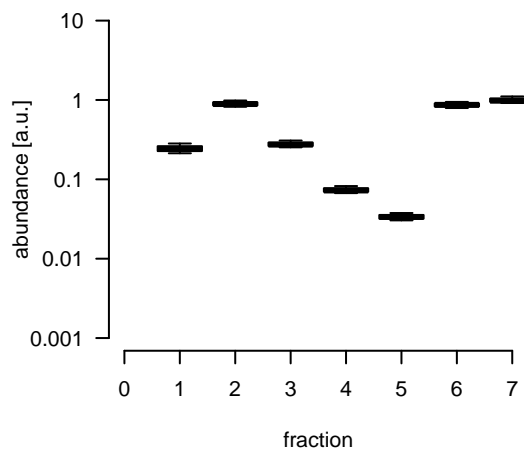**fluxes**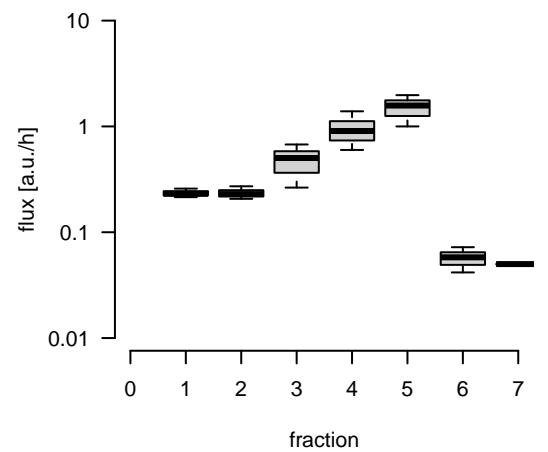

**mS25 fraction: 1**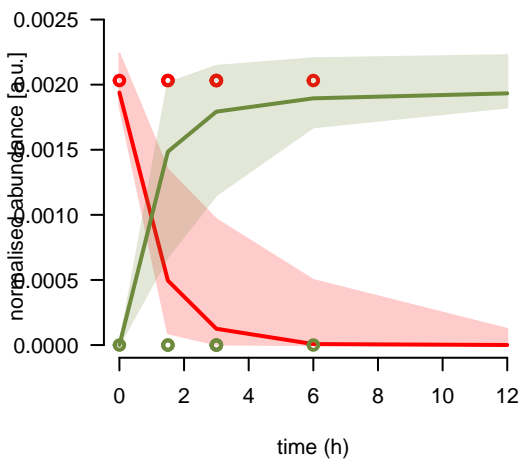**fraction: 2**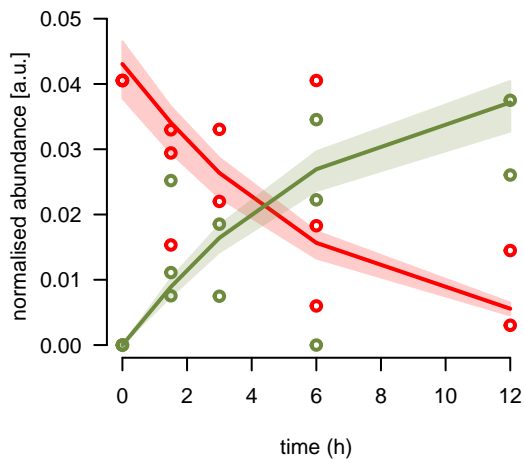**fraction: 3**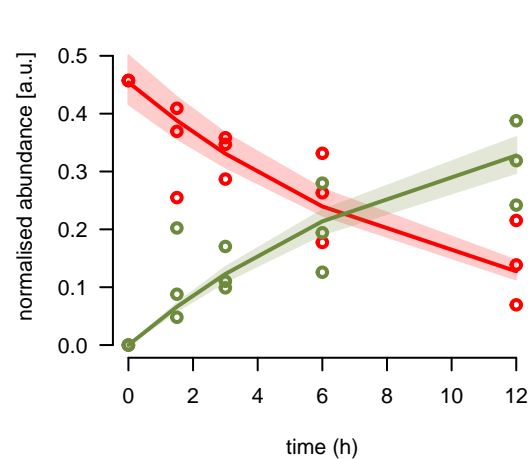**fraction: 4**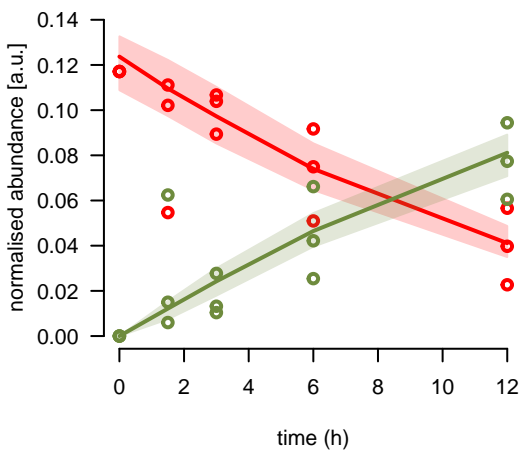**fraction: 5**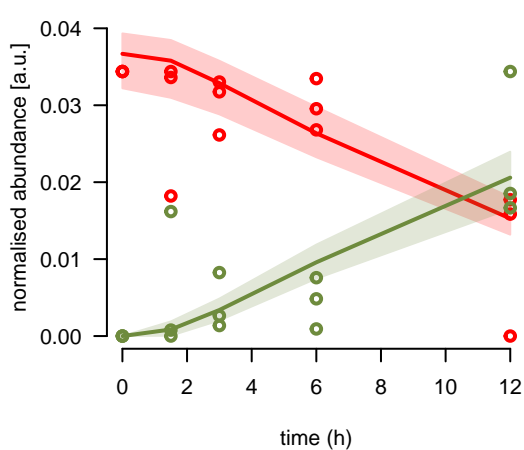**fraction: 6**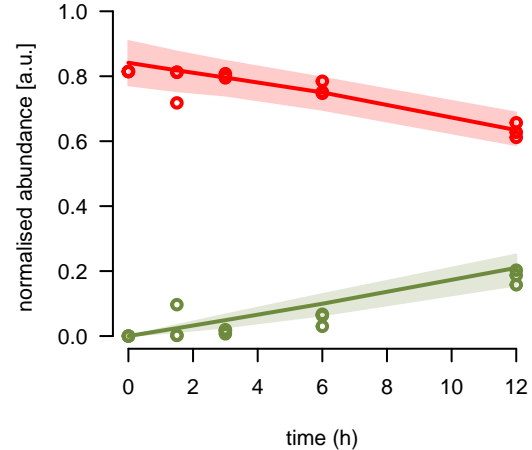**fraction: 7**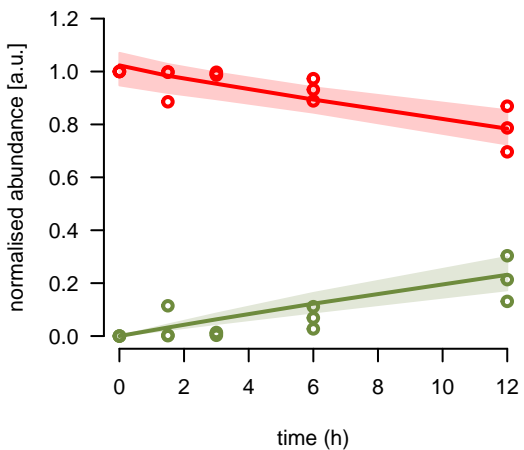**abundances**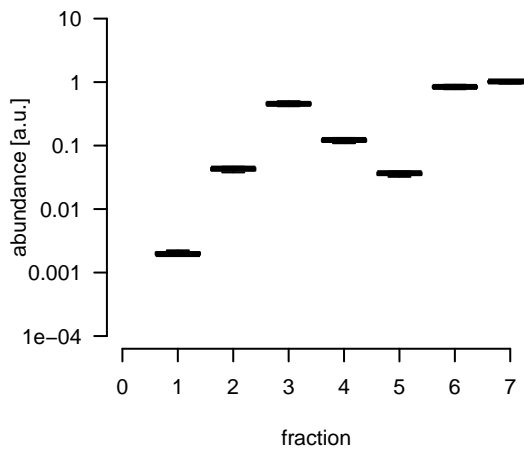**fluxes**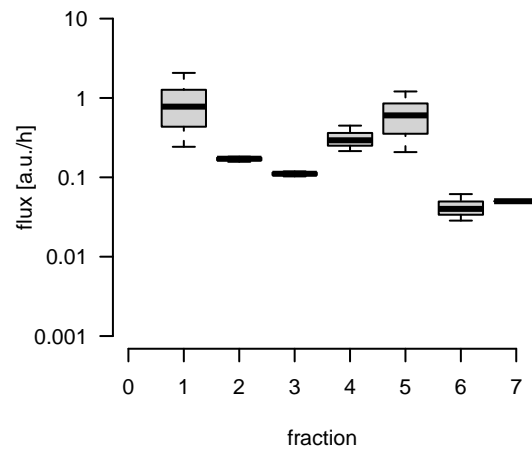

**mS26 fraction: 1****fraction: 2**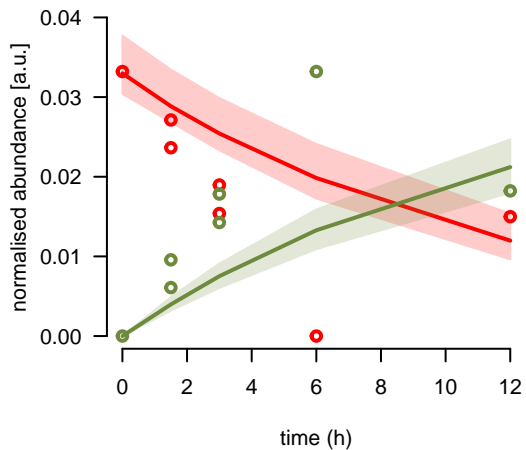**fraction: 3**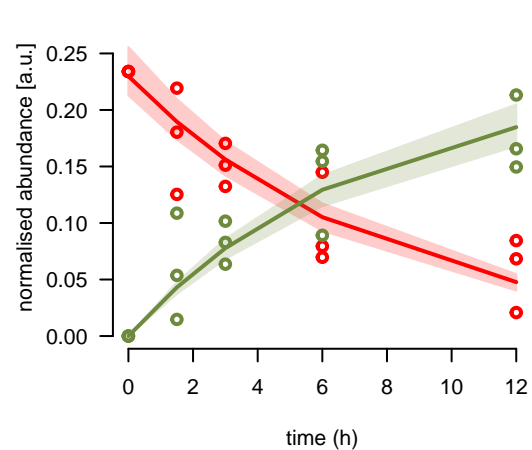**fraction: 4**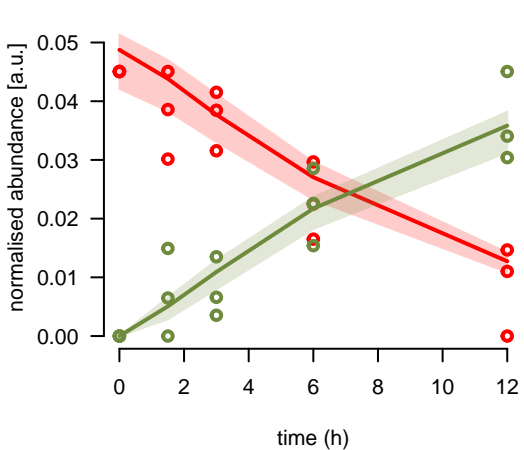**fraction: 5**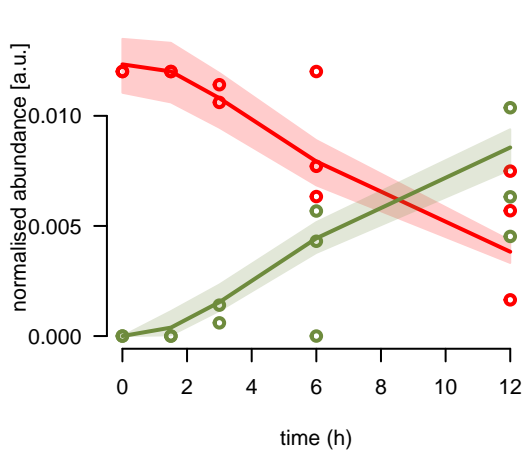**fraction: 6**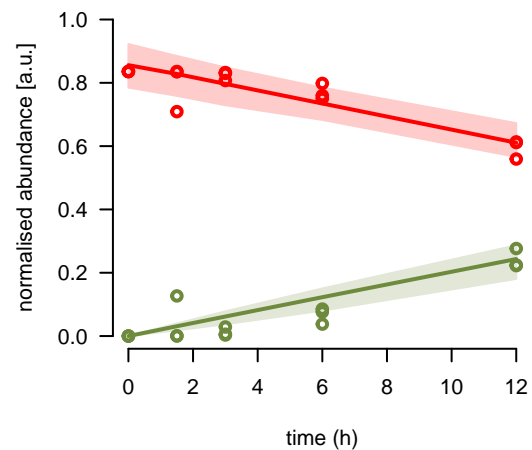**fraction: 7**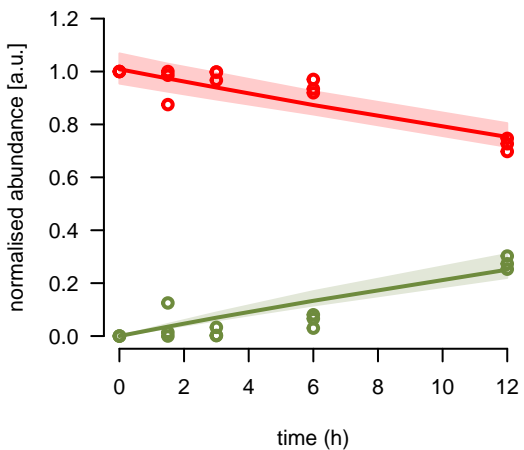**abundances**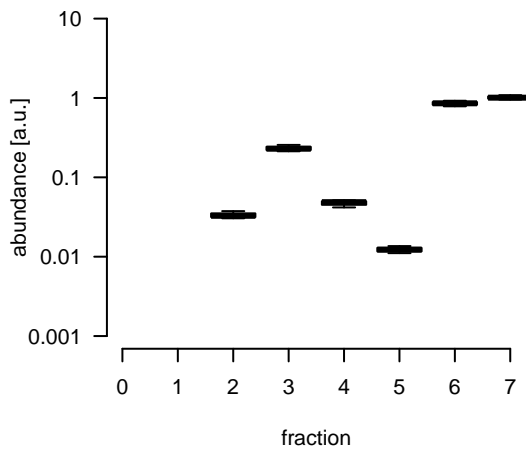**fluxes**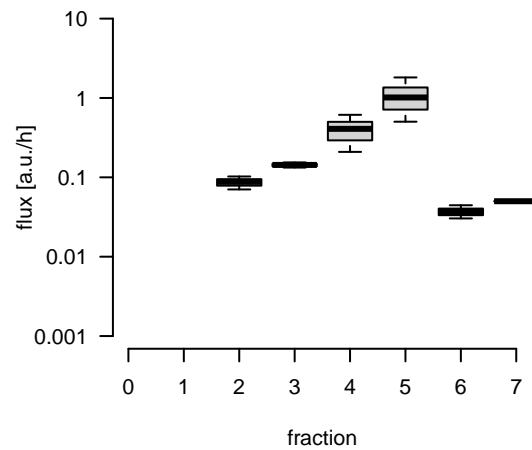

**mS27 fraction: 1**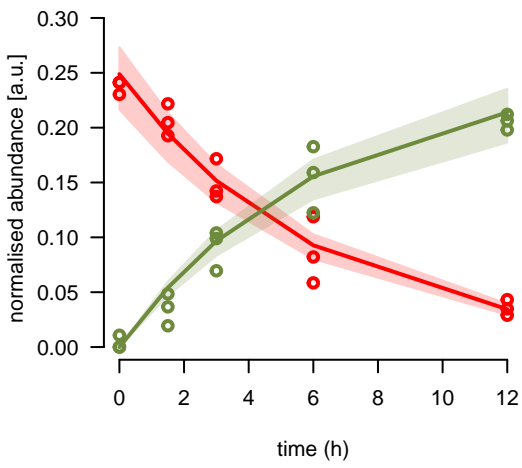**fraction: 2**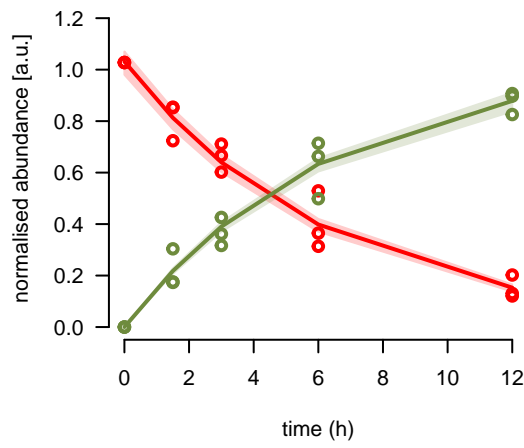**fraction: 3**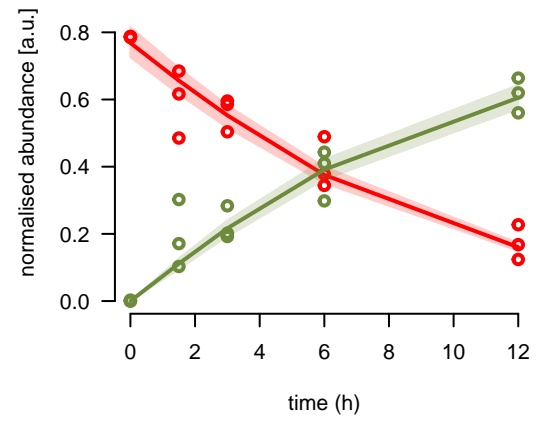**fraction: 4**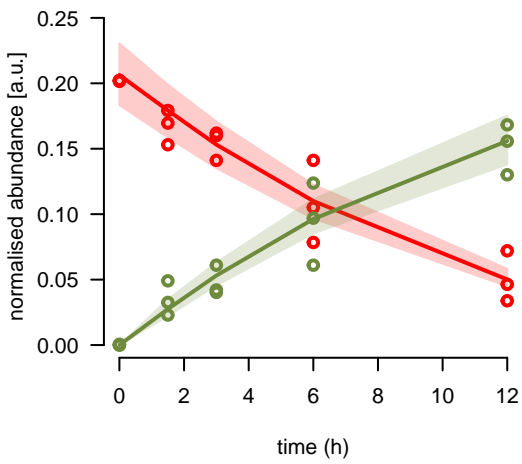**fraction: 5**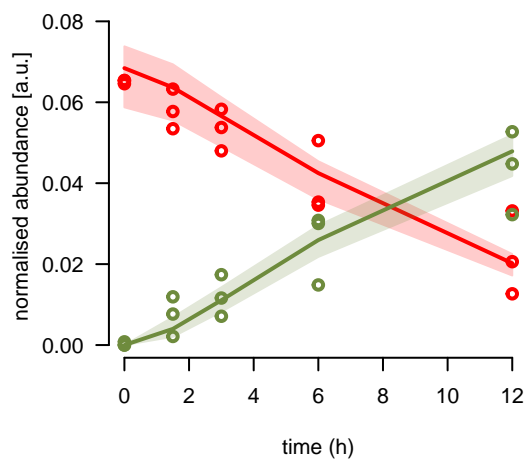**fraction: 6**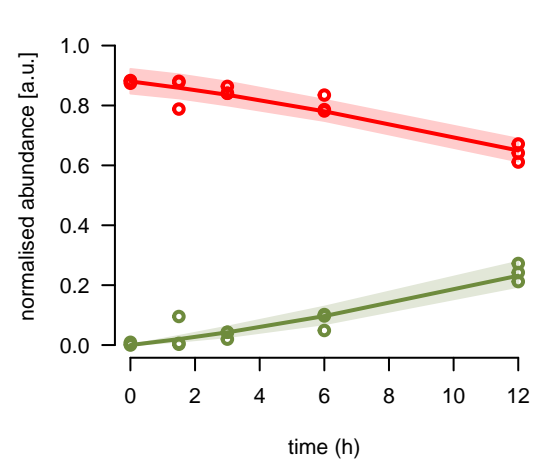**fraction: 7**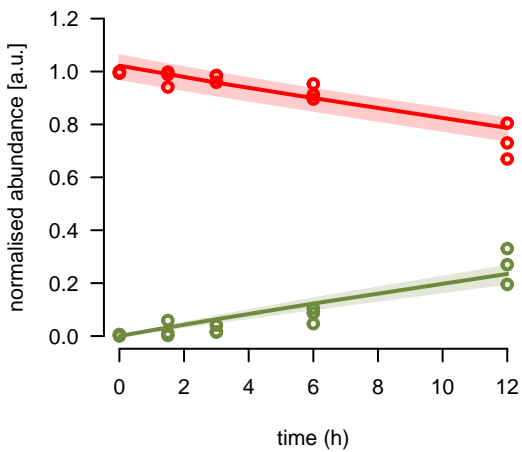**abundances**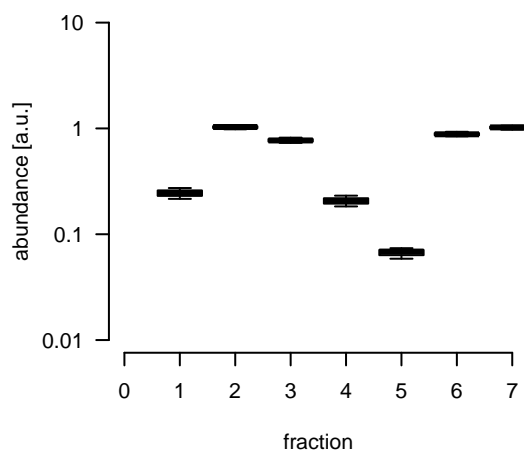**fluxes**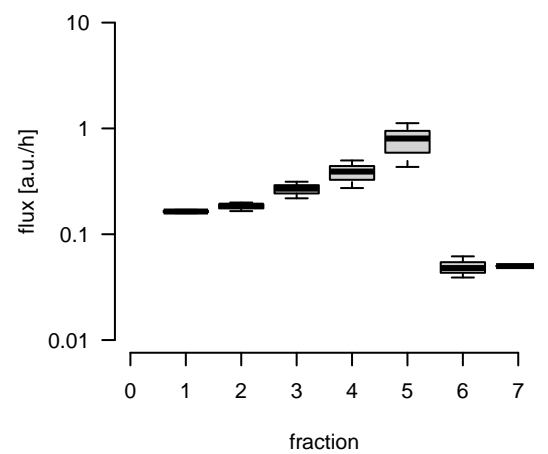

**mS29 fraction: 1**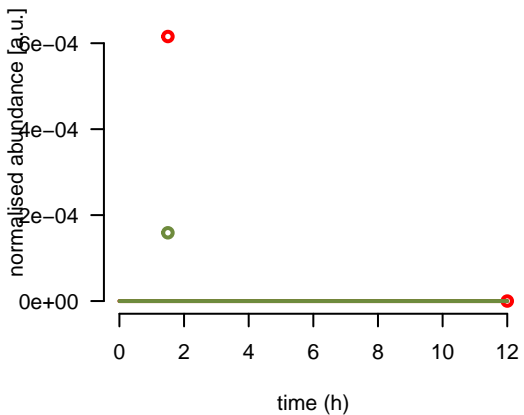**fraction: 2**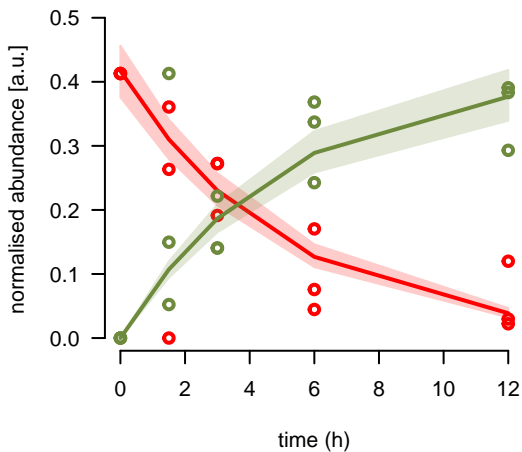**fraction: 3**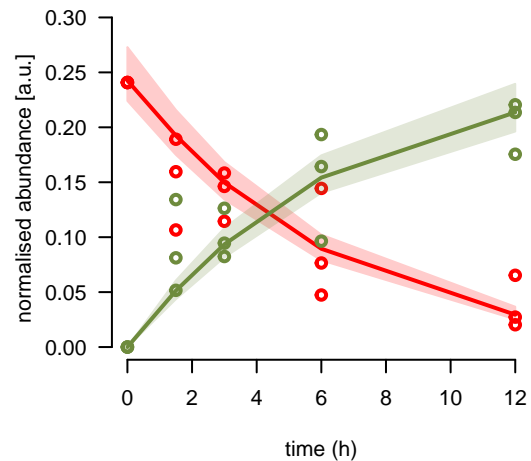**fraction: 4**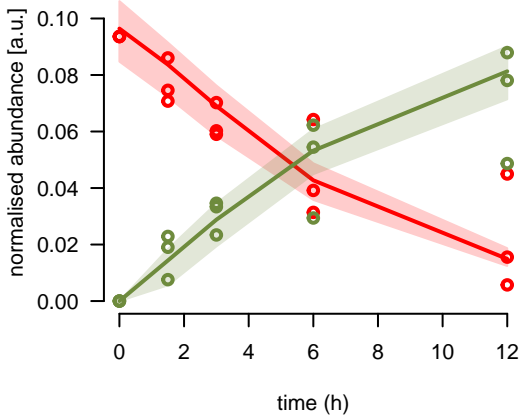**fraction: 5**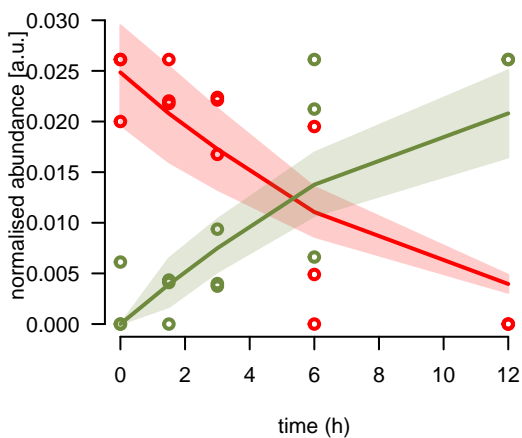**fraction: 6**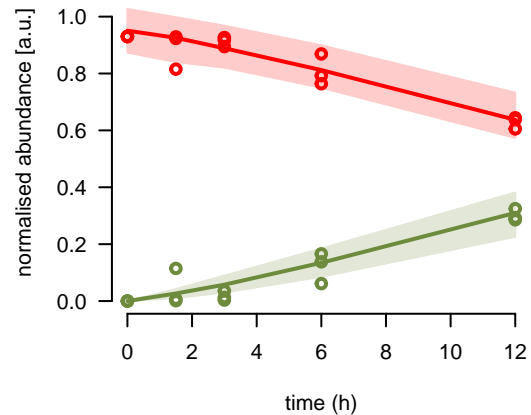**fraction: 7**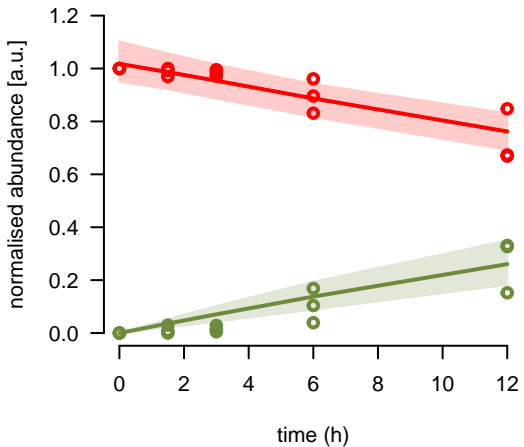**abundances**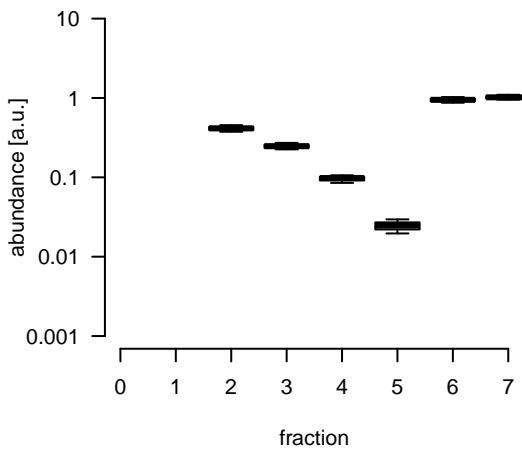**fluxes**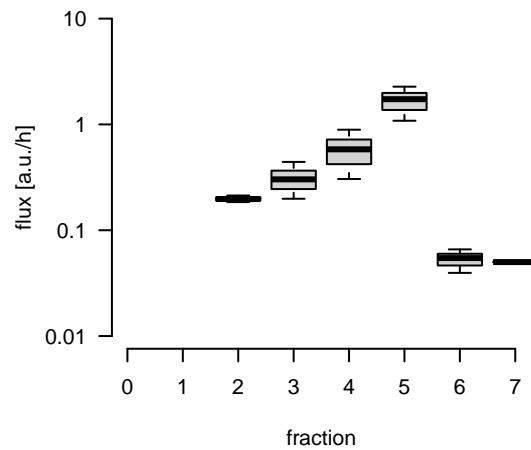

**mS31 fraction: 1**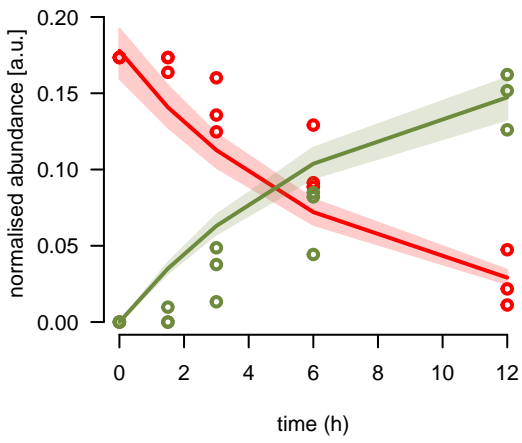**fraction: 2**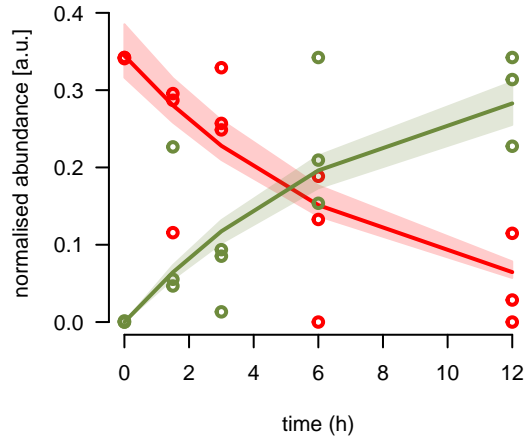**fraction: 3**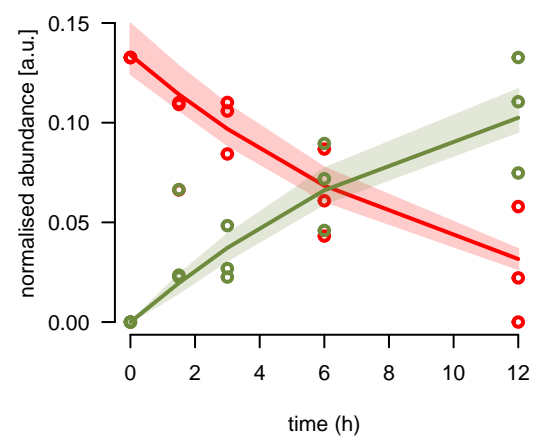**fraction: 4**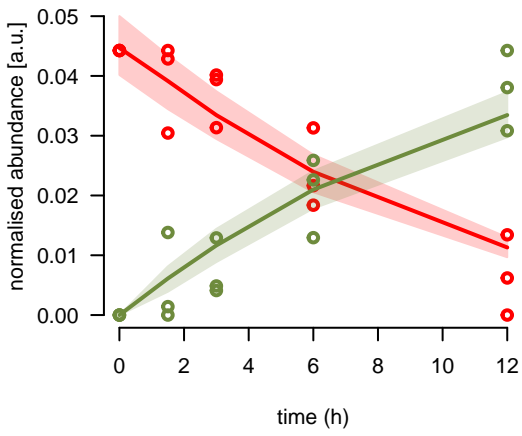**fraction: 5**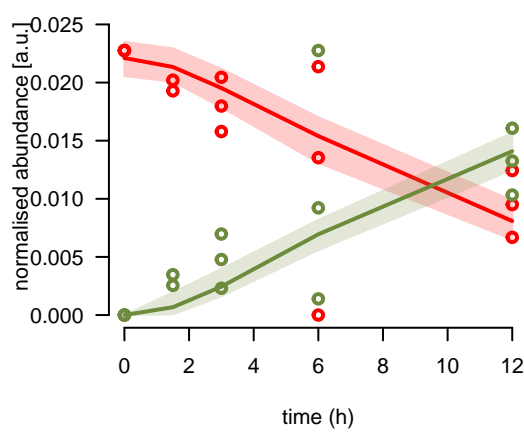**fraction: 6**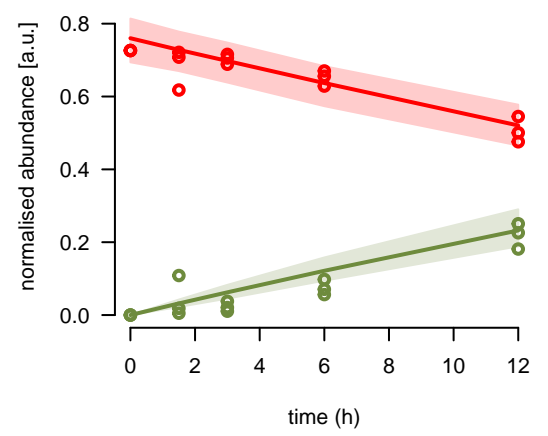**fraction: 7**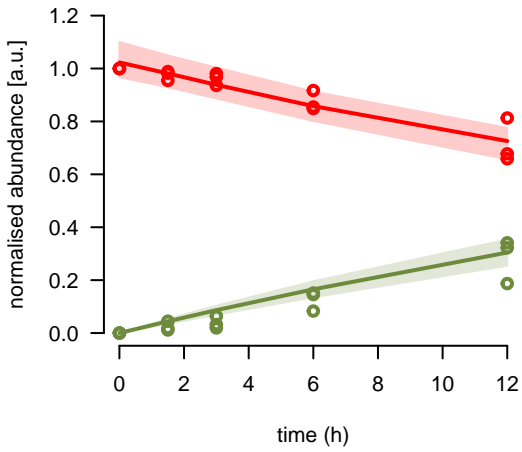**abundances**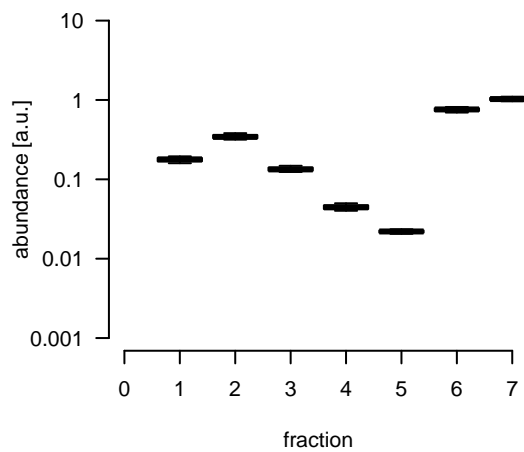**fluxes**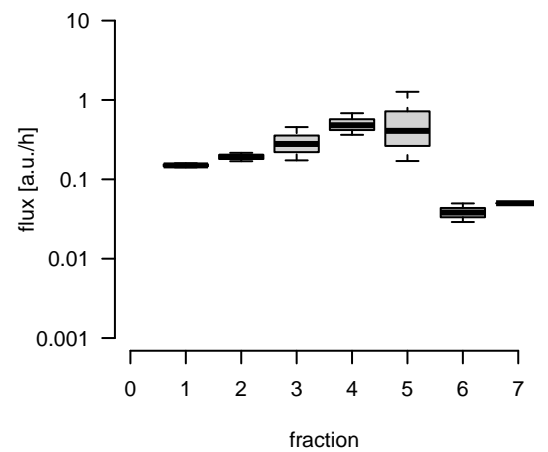

**mS33 fraction: 1**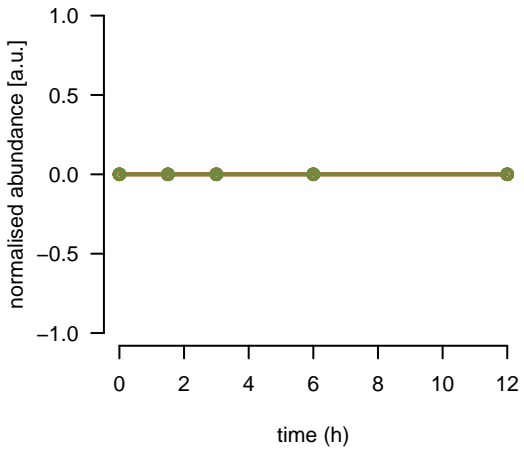**fraction: 2**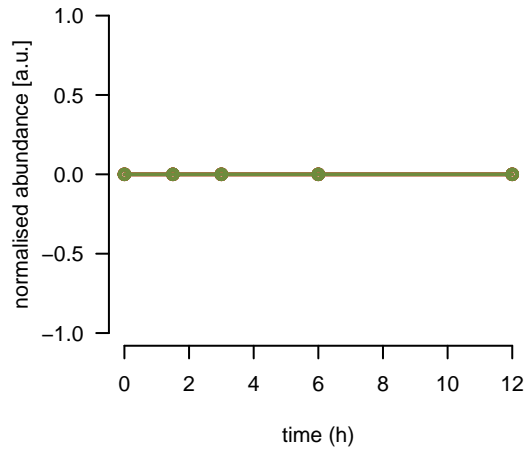**fraction: 3**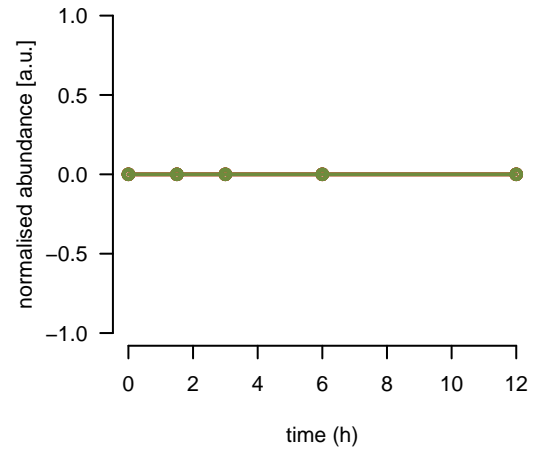**fraction: 4**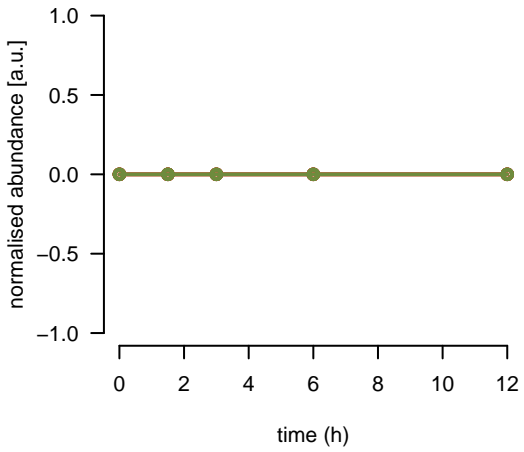**fraction: 5**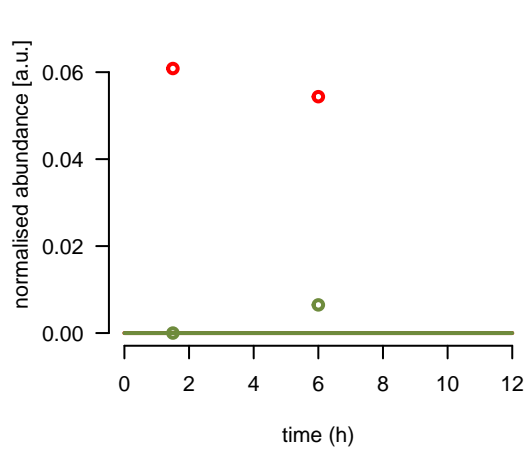**fraction: 6**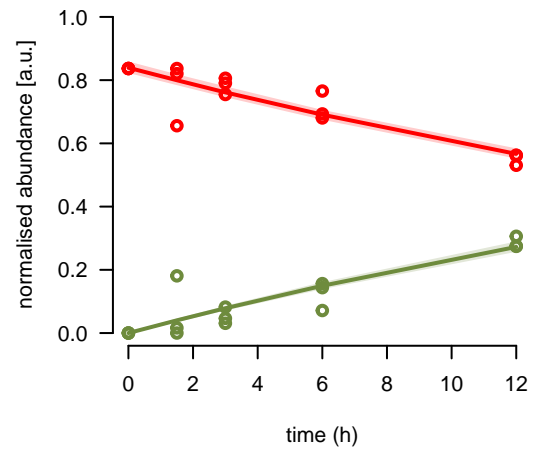**fraction: 7**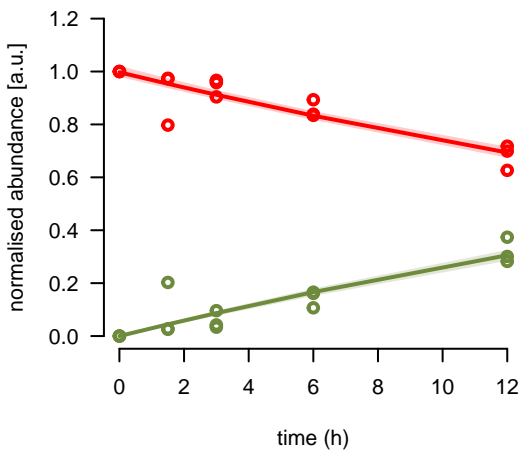**abundances**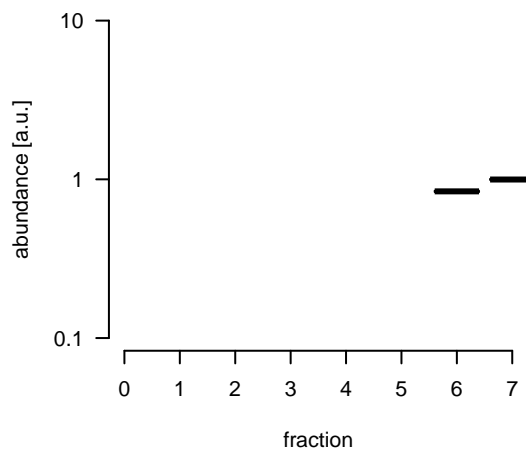**fluxes**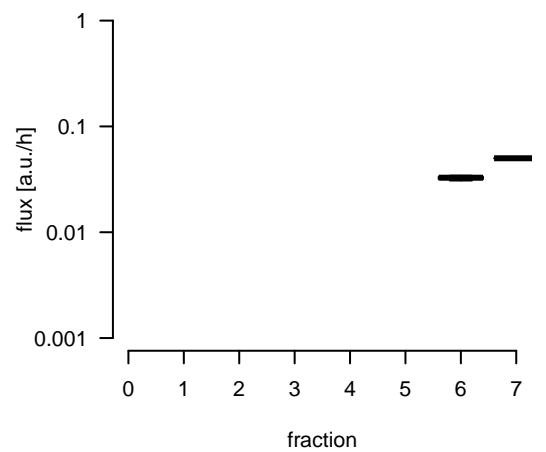



**mS34 fraction: 1**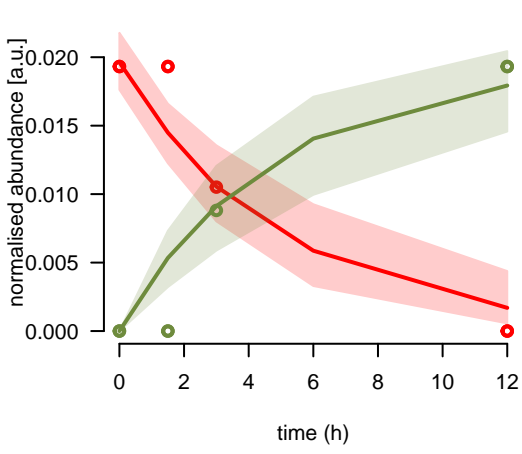**fraction: 2**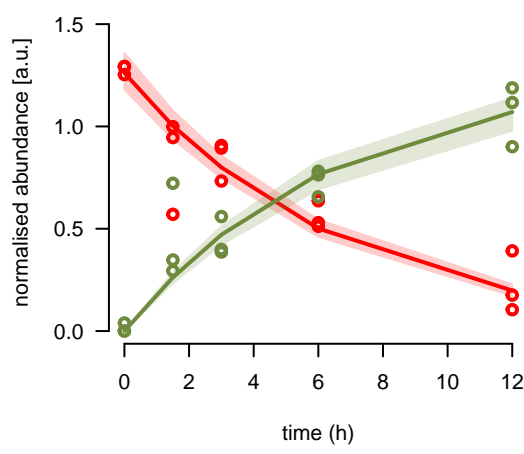**fraction: 3**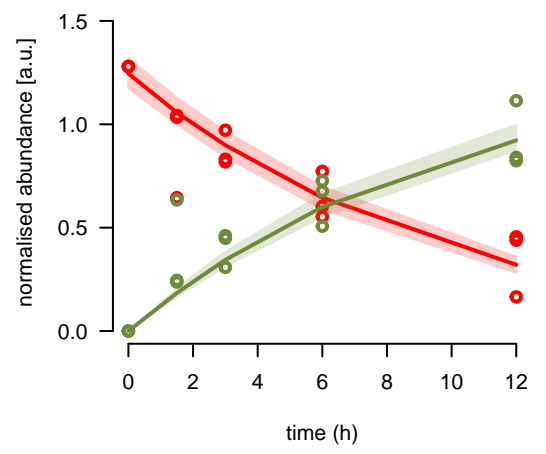**fraction: 4**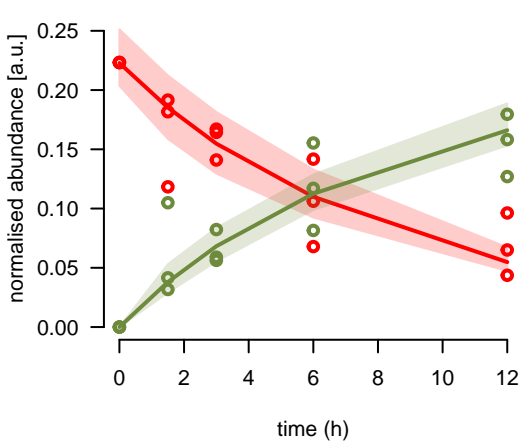**fraction: 5**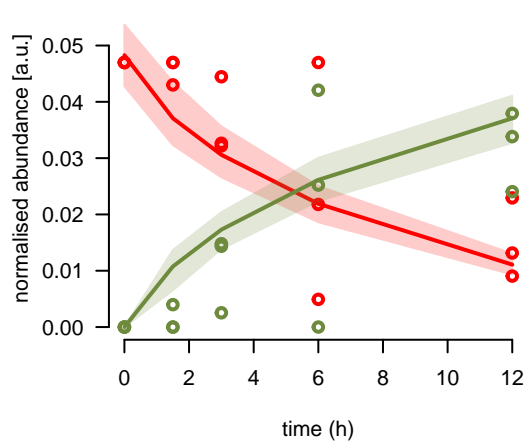**fraction: 6**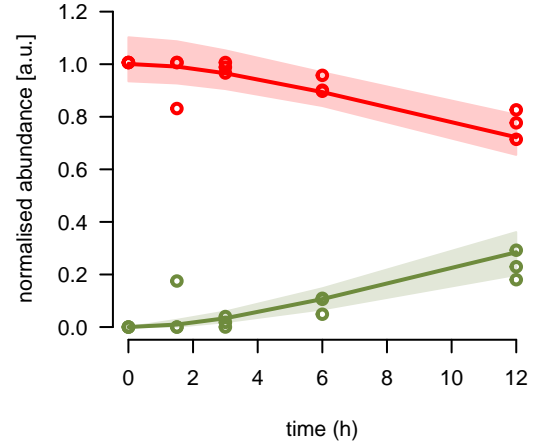**fraction: 7**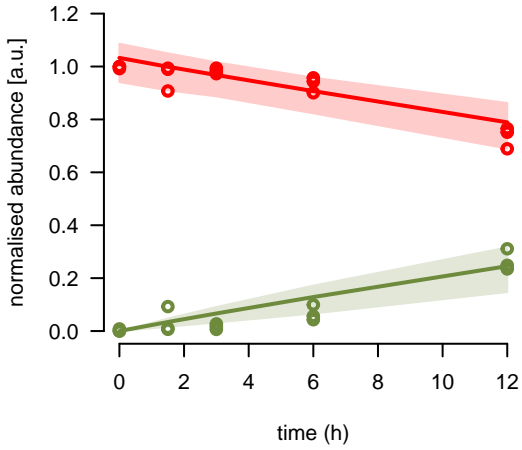**abundances**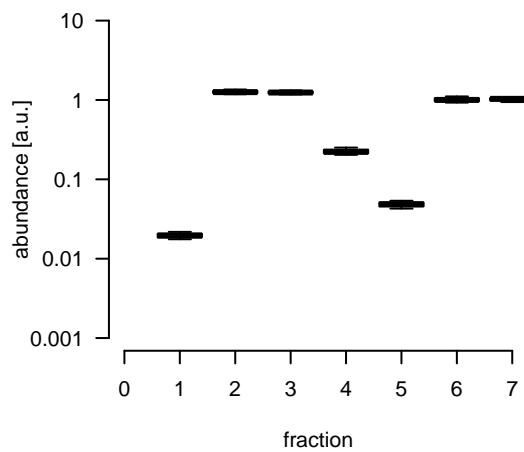**fluxes**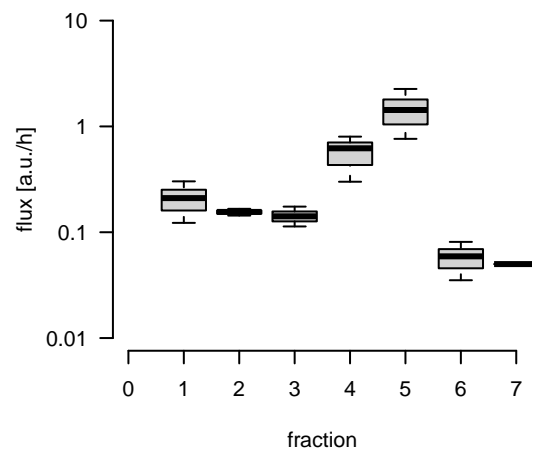

**mS35 fraction: 1**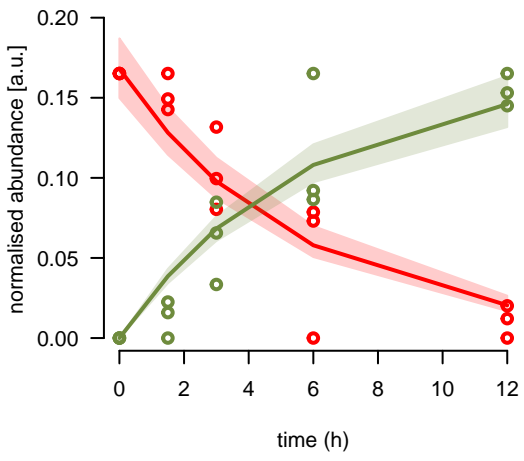**fraction: 2**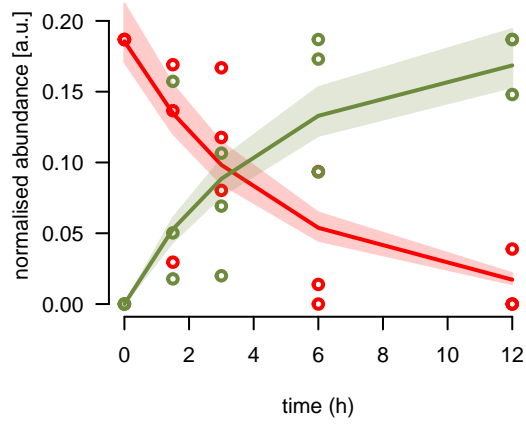**fraction: 3**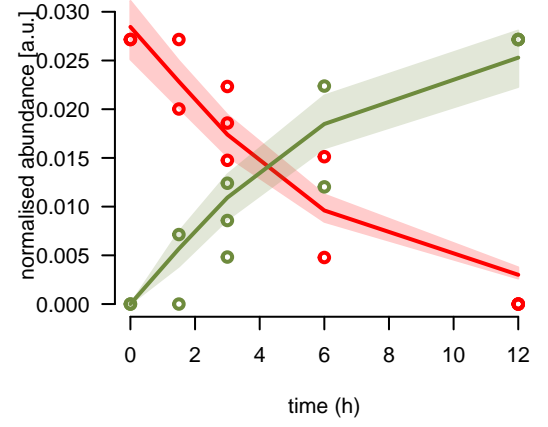**fraction: 4**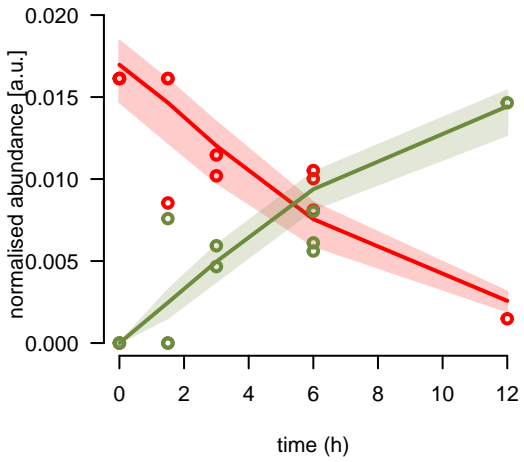**fraction: 5**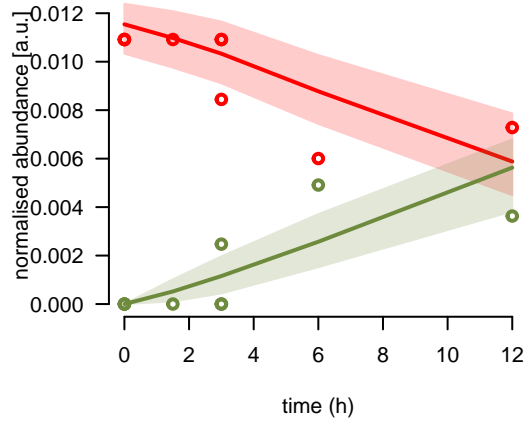**fraction: 6**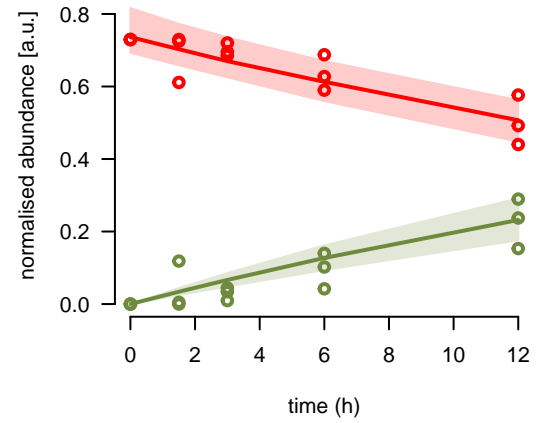**fraction: 7**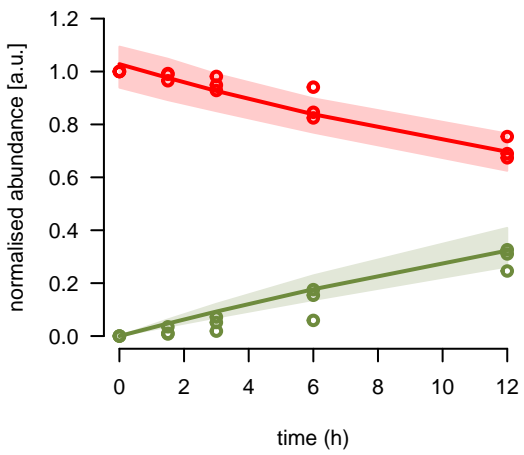**abundances**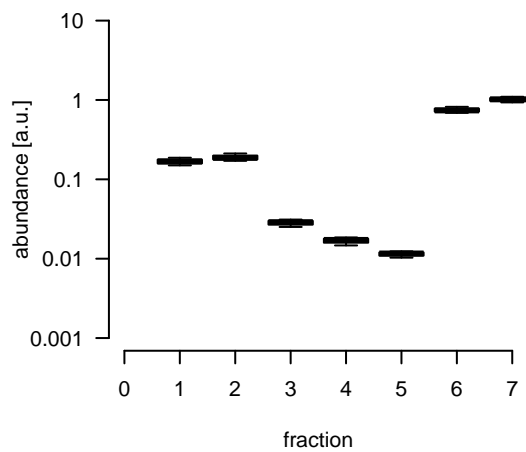**fluxes**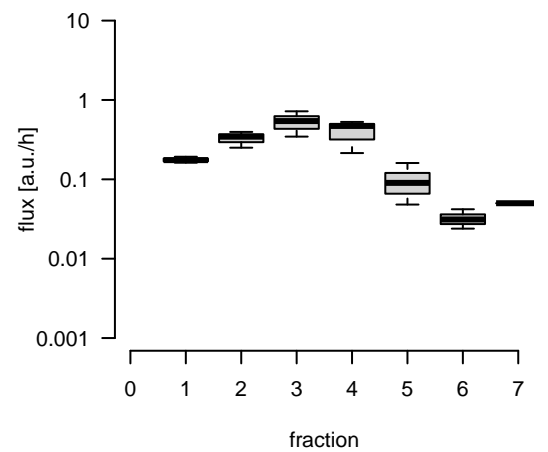

**mS38 fraction: 1**

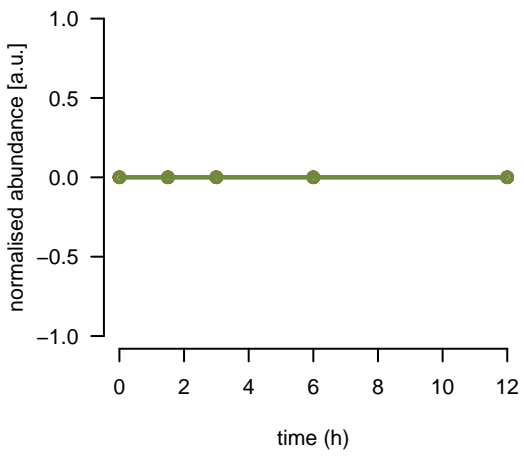

**fraction: 2**

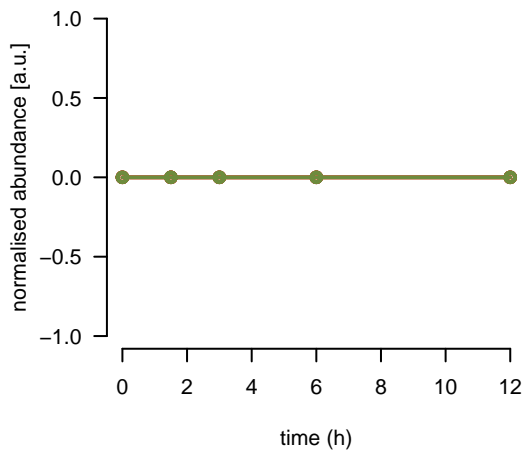

**fraction: 3**

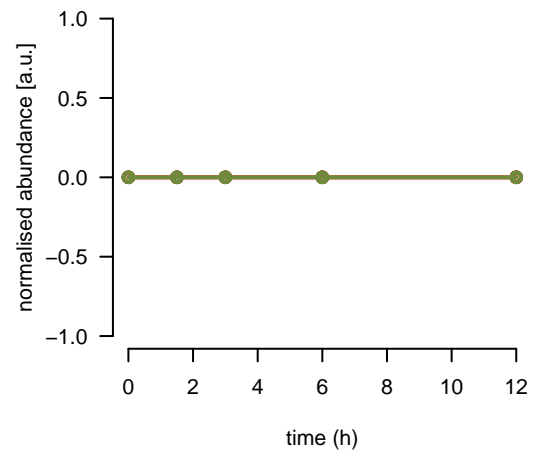

**fraction: 4**

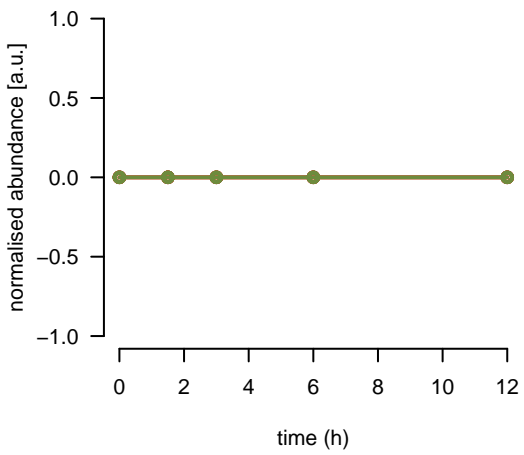

**fraction: 5**

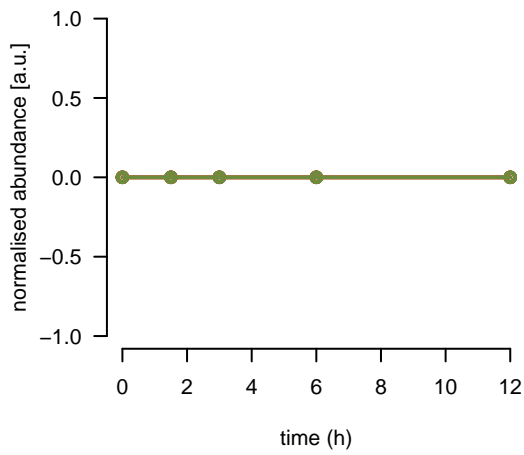

**fraction: 6**

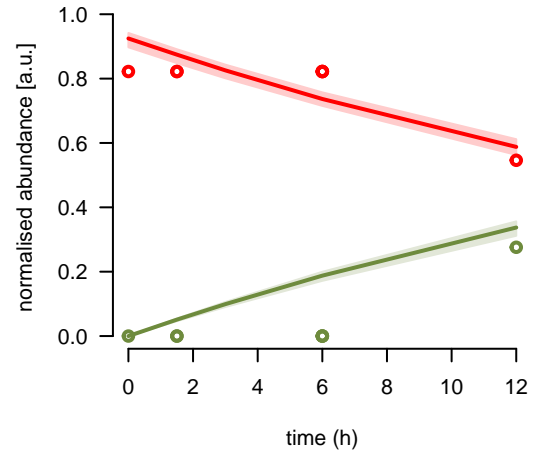

**fraction: 7**

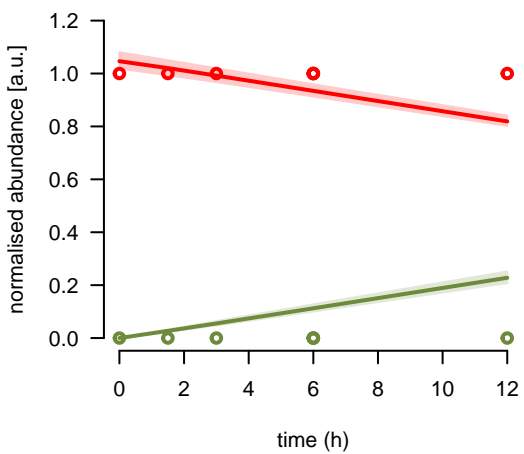

**abundances**

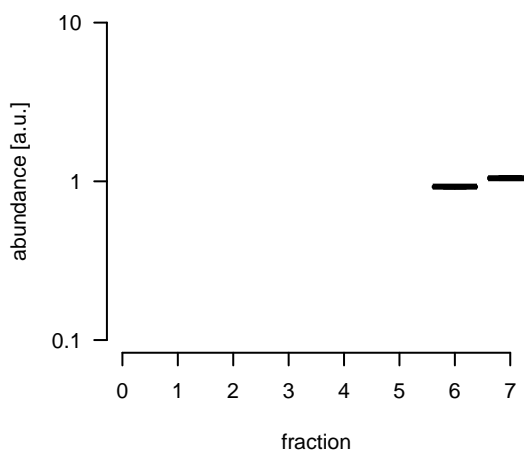

**fluxes**

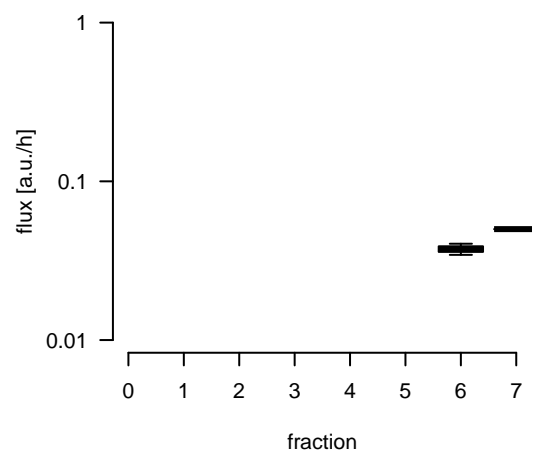

**mS39 fraction: 1**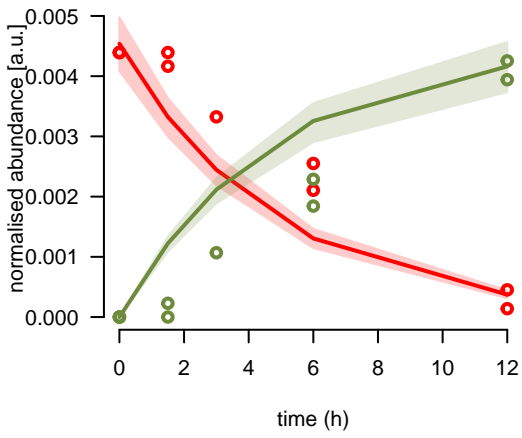**fraction: 2**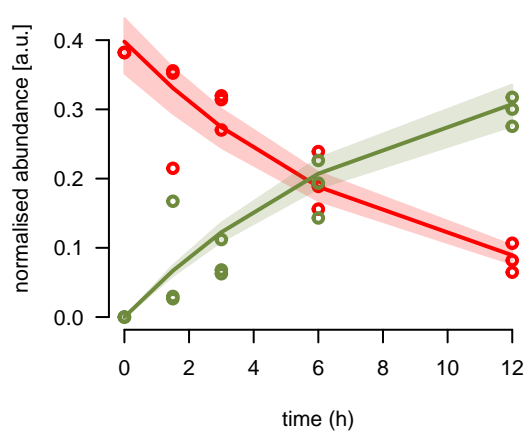**fraction: 3**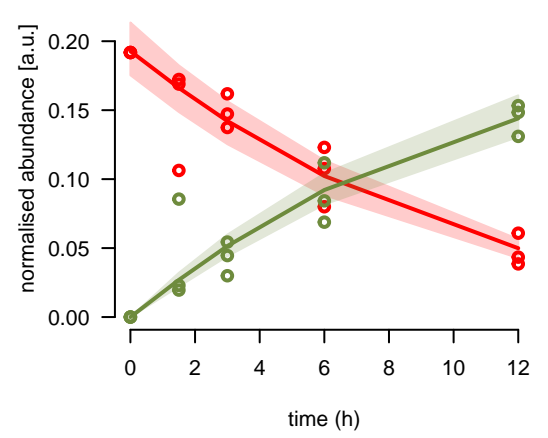**fraction: 4**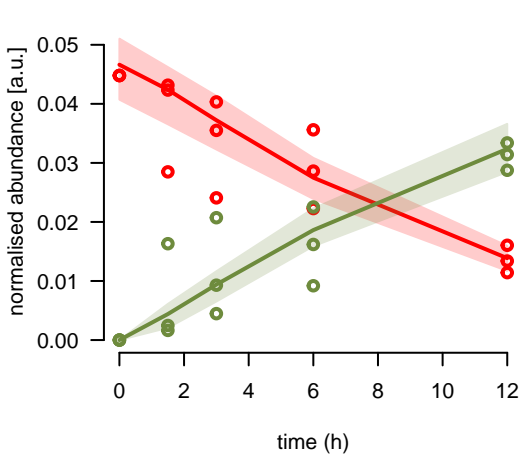**fraction: 5**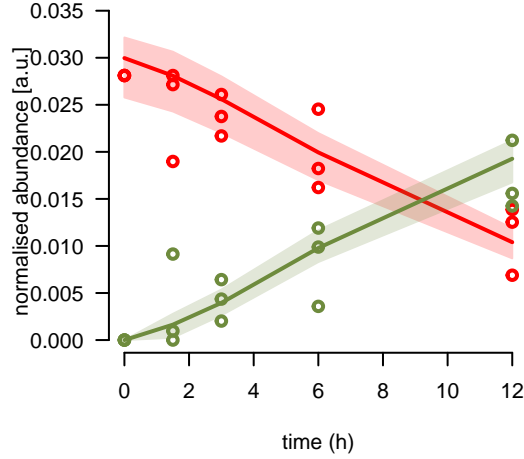**fraction: 6**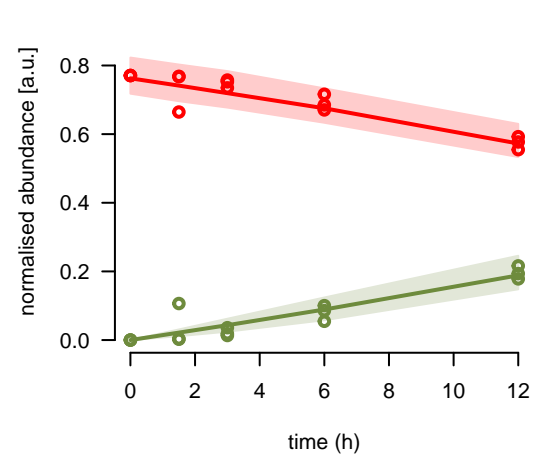**fraction: 7**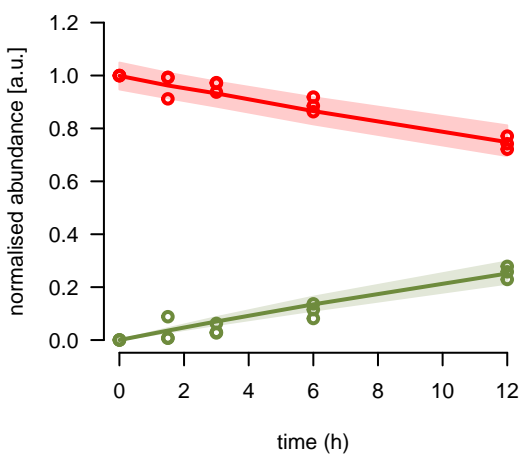**abundances**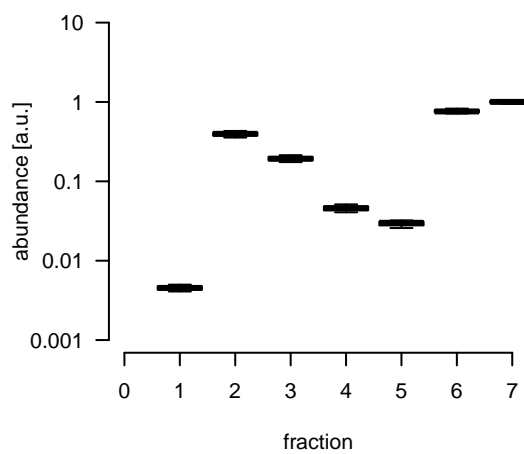**fluxes**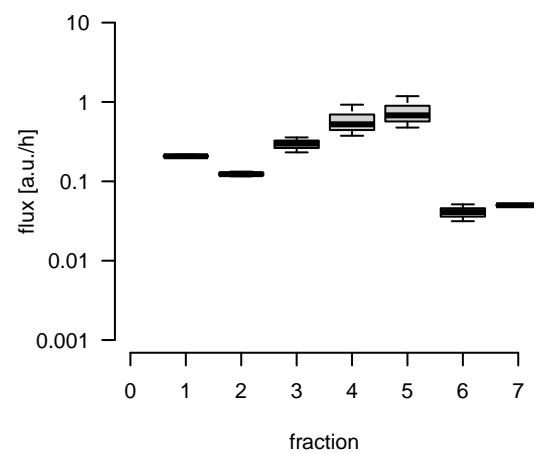

**mS40 fraction: 1****fraction: 2**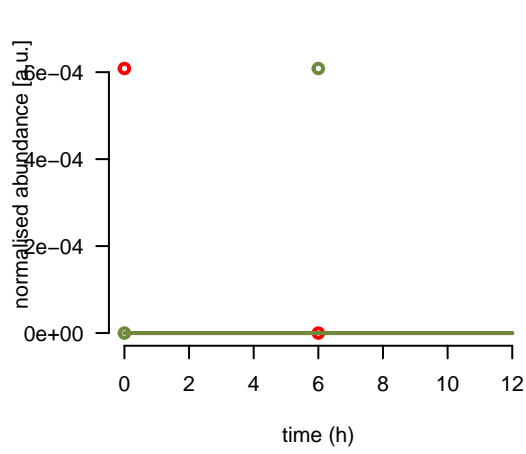**fraction: 3**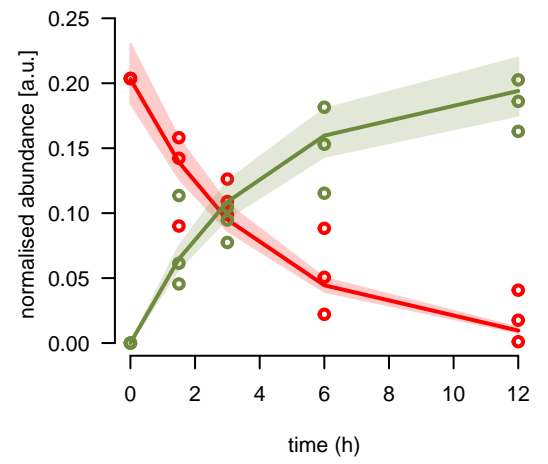**fraction: 4**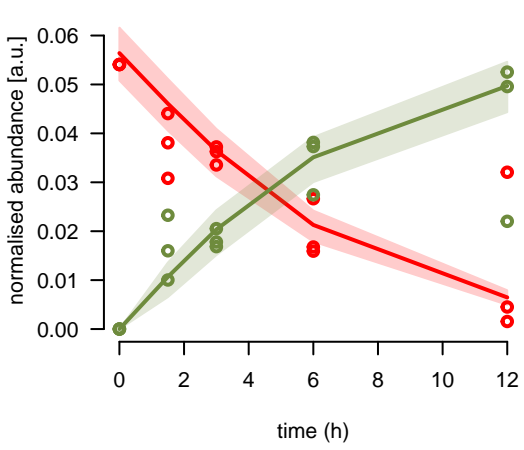**fraction: 5**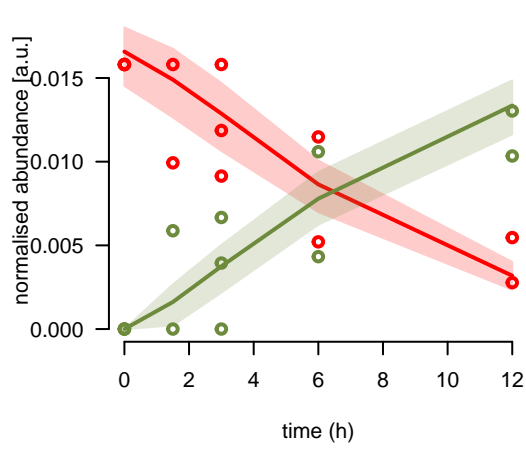**fraction: 6**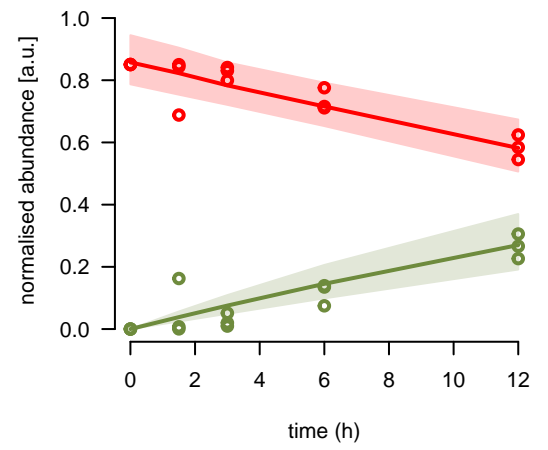**fraction: 7**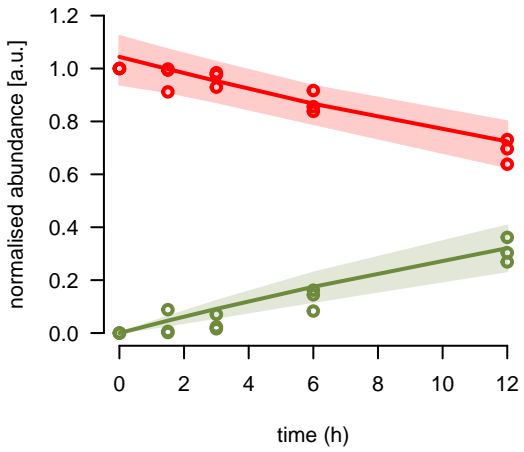**abundances**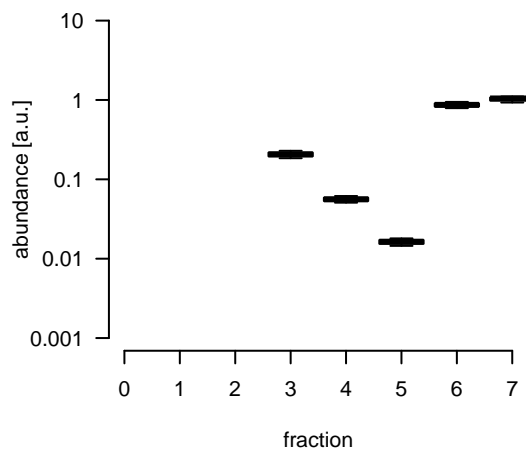**fluxes**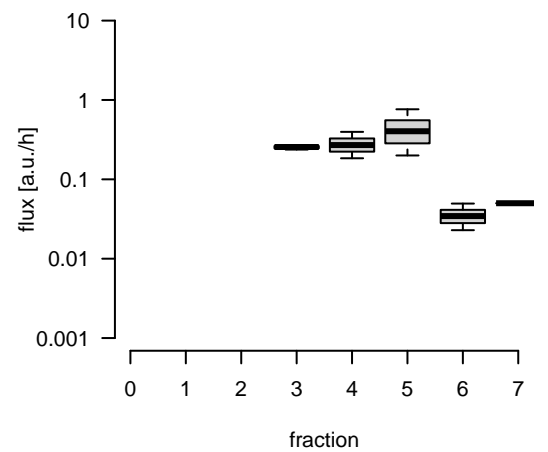

Supplement: 41594_2024_1356_MOESM9_ESM.pdf [file 41594_2024_1356_MOESM9_ESM.pdf]
