# Supplementary material for: A roadmap for ribosome assembly in human mitochondria
Source: PubMed Central journal article supplement (PMC11638073; doi:10.1038/s41594-024-01356-w), 2024-07-11

**uL1m fraction: 1**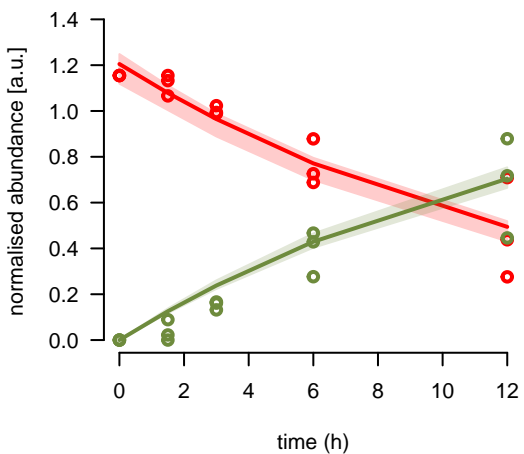**fraction: 2**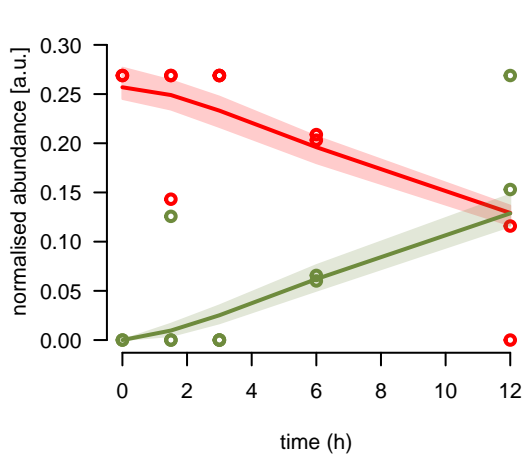**fraction: 3**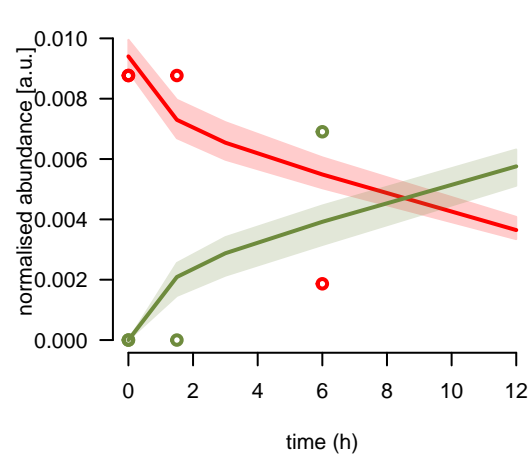**fraction: 4**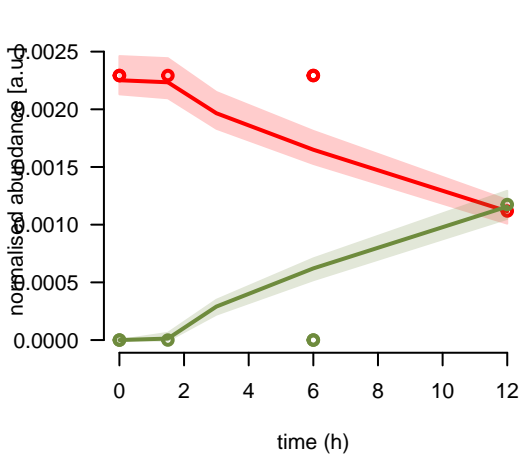**fraction: 5**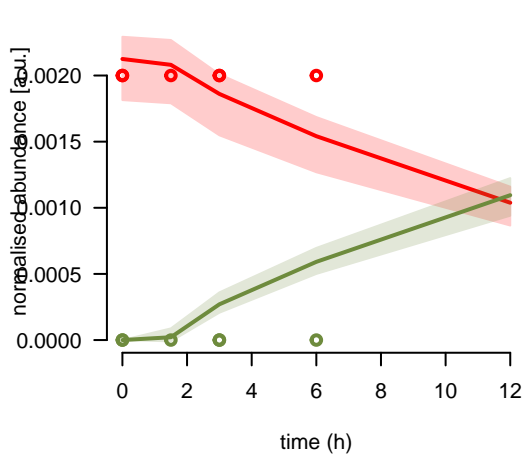**fraction: 6**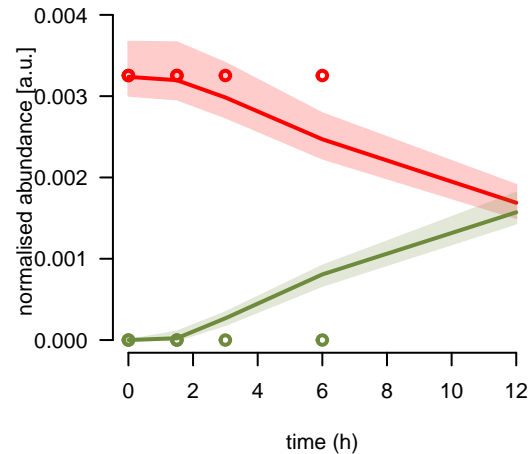**fraction: 7**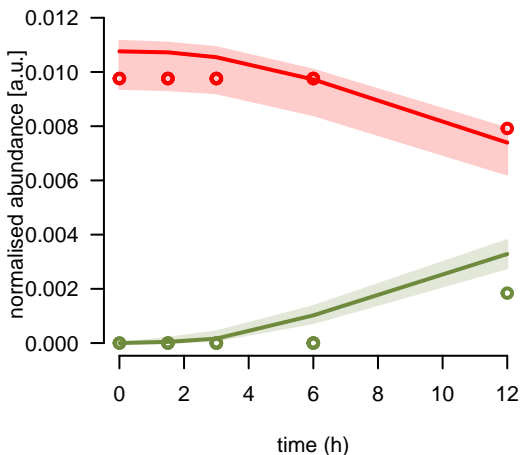**fraction: 8**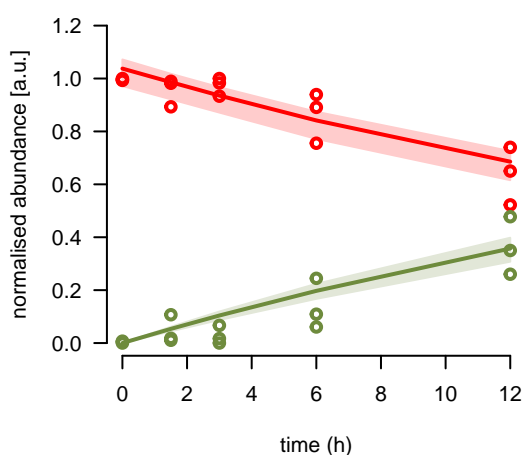**fraction: 9**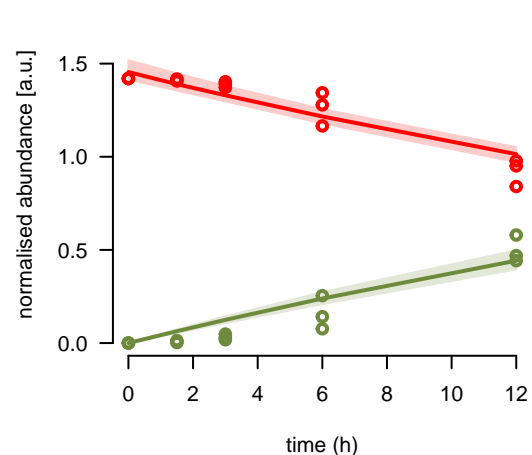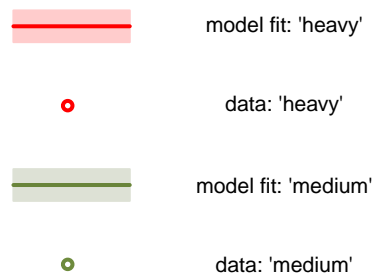**abundances**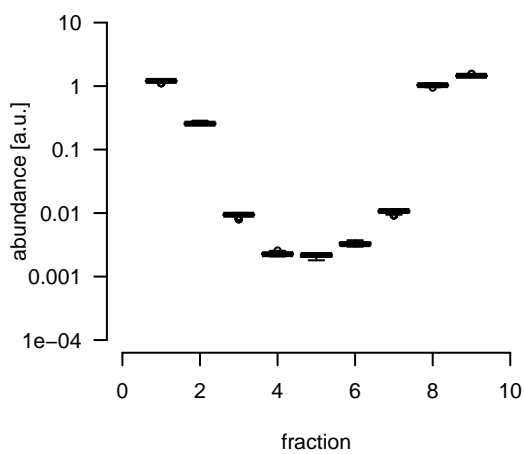**fluxes**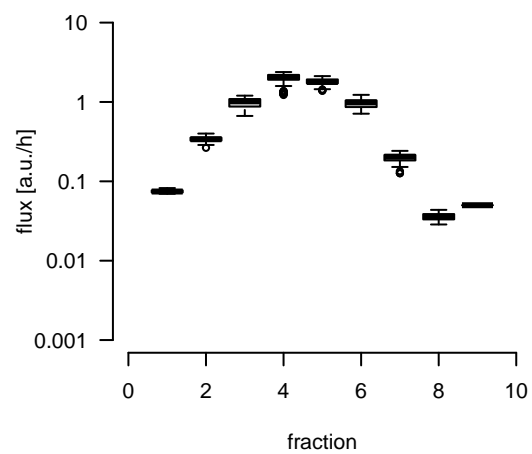

**uL2m fraction: 1**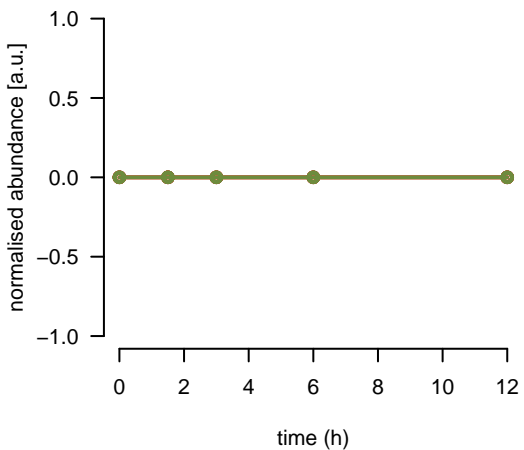**fraction: 2**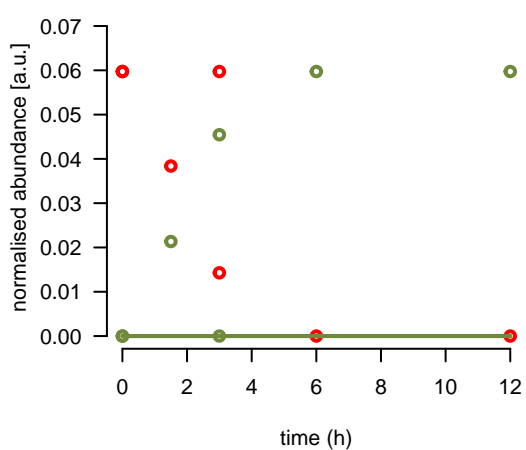**fraction: 3**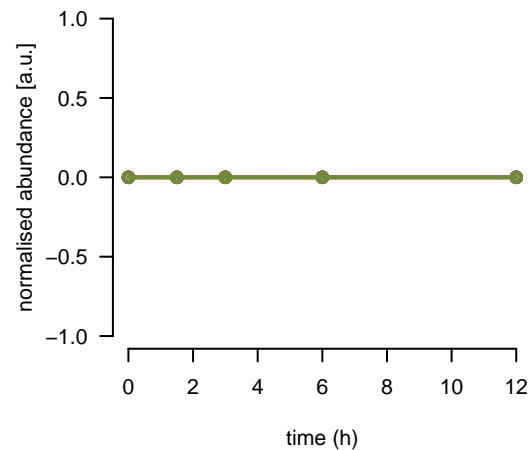**fraction: 4**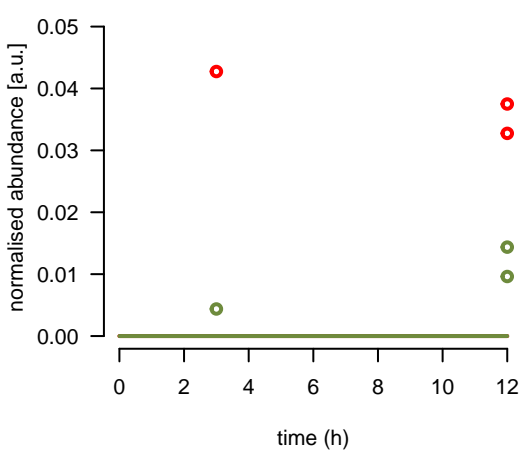**fraction: 5**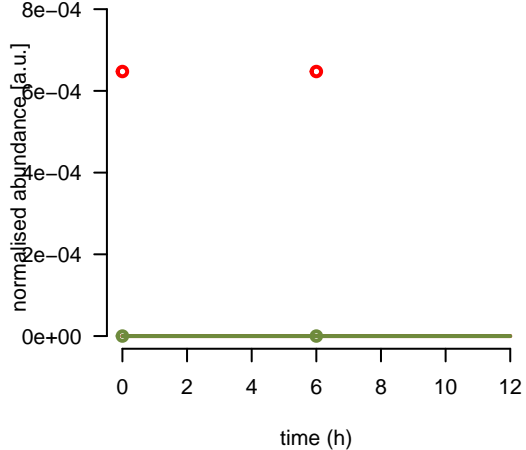**fraction: 6****fraction: 7**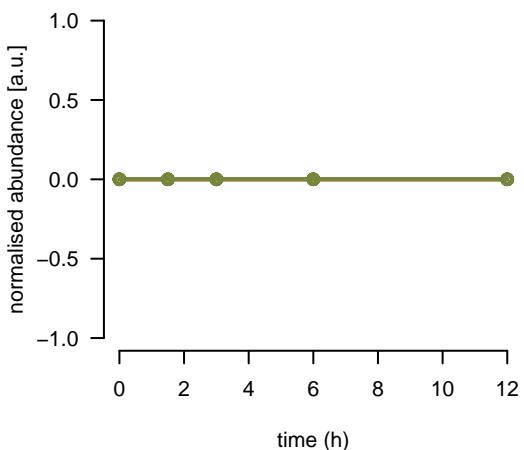**fraction: 8**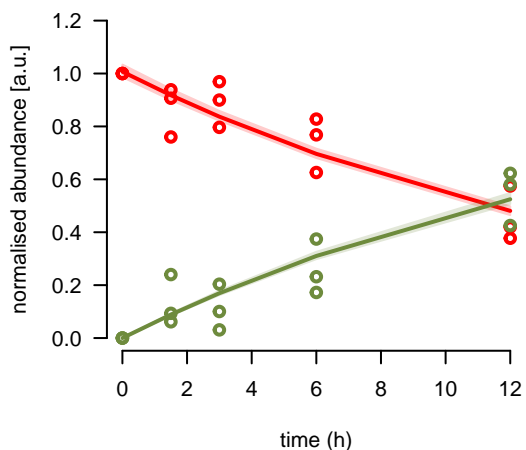**fraction: 9**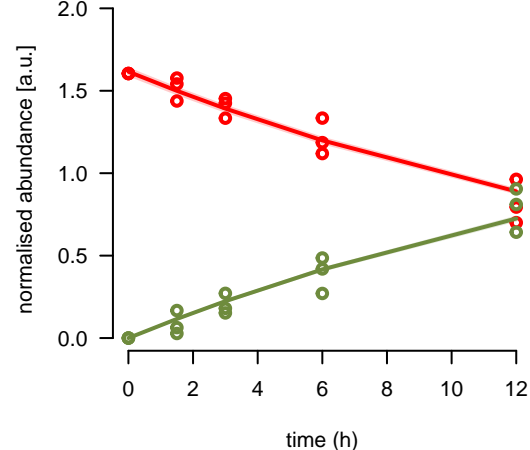**abundances**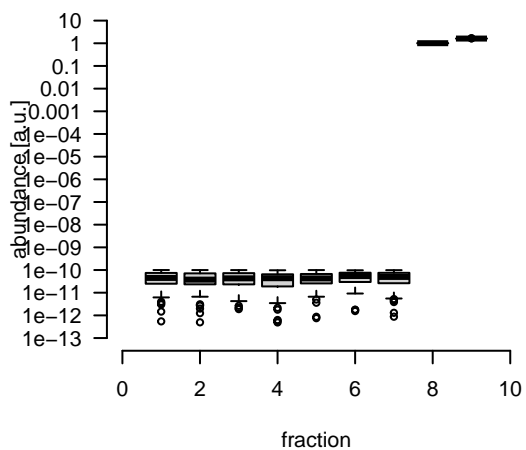**fluxes**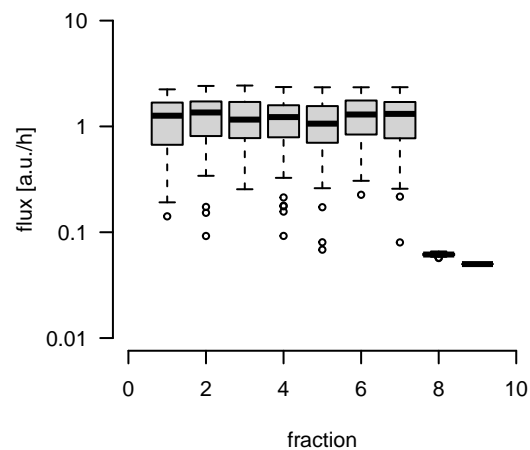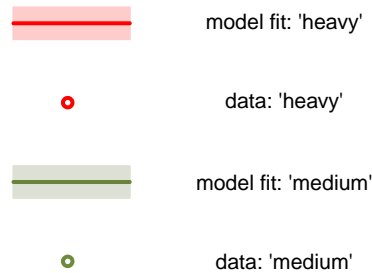

**uL3m fraction: 1****fraction: 2**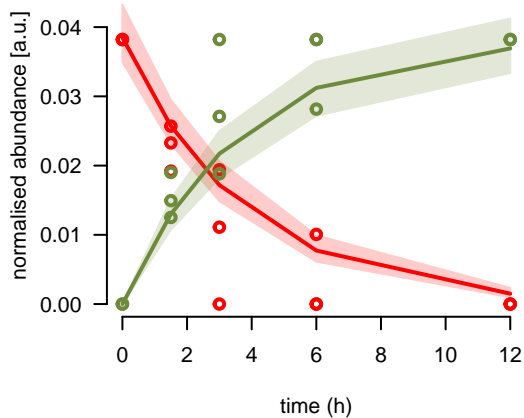**fraction: 3**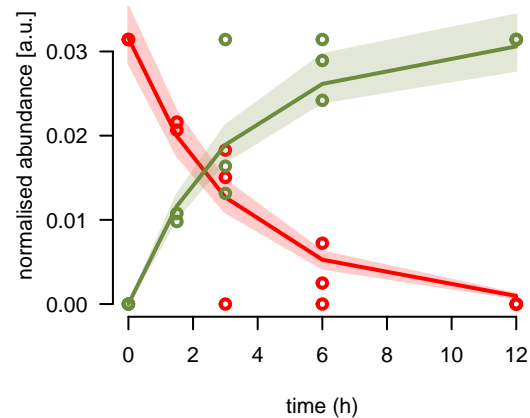**fraction: 4**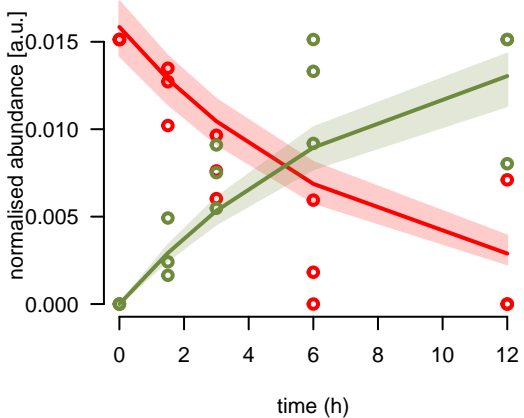**fraction: 5**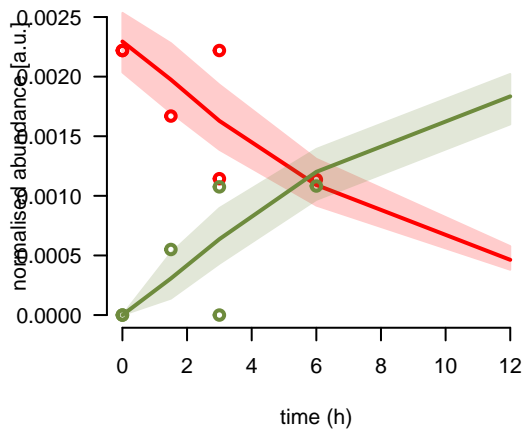**fraction: 6**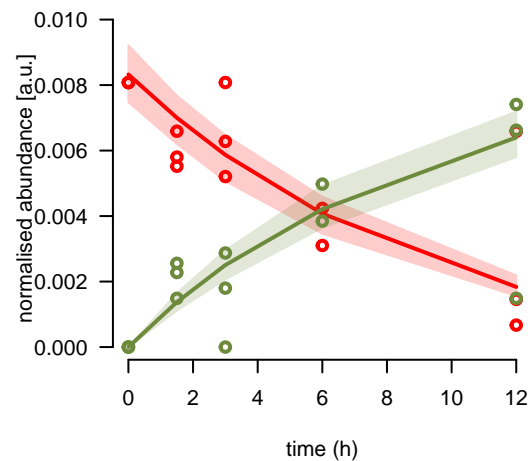**fraction: 7**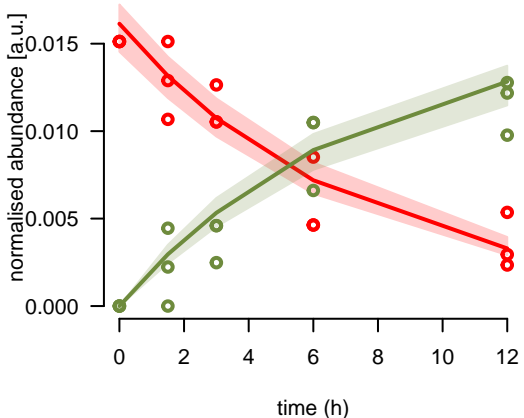**fraction: 8**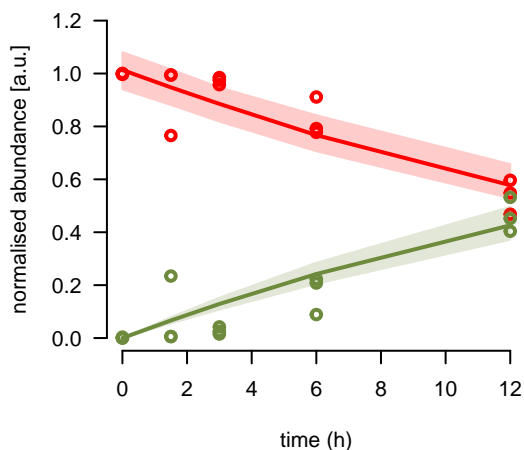**fraction: 9**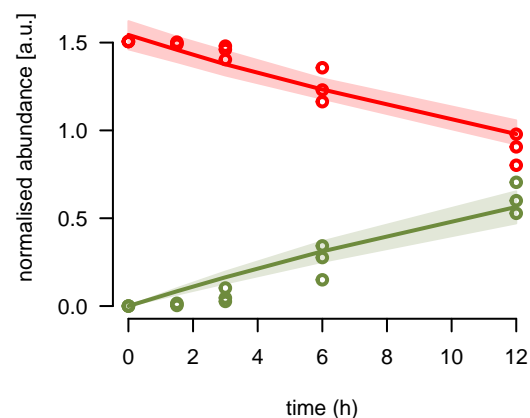**abundances**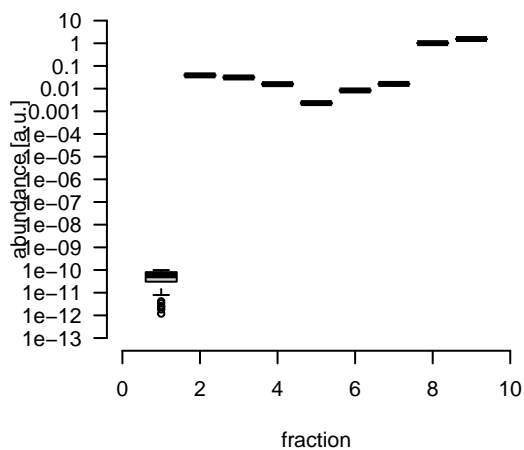**fluxes**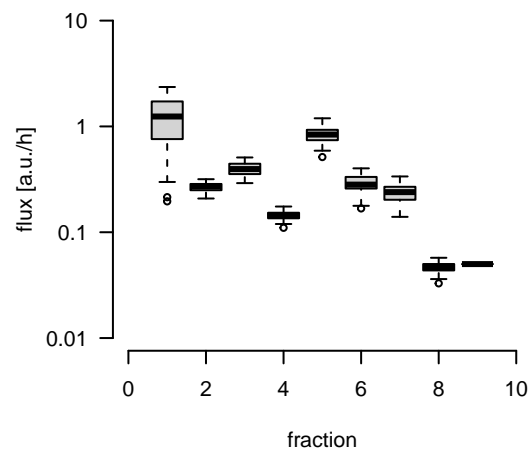

**uL4m fraction: 1****fraction: 2**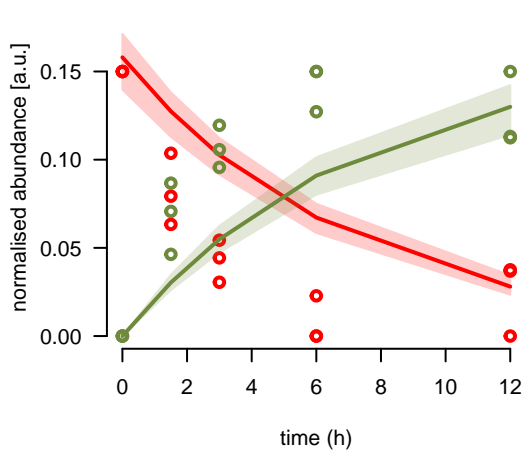**fraction: 3**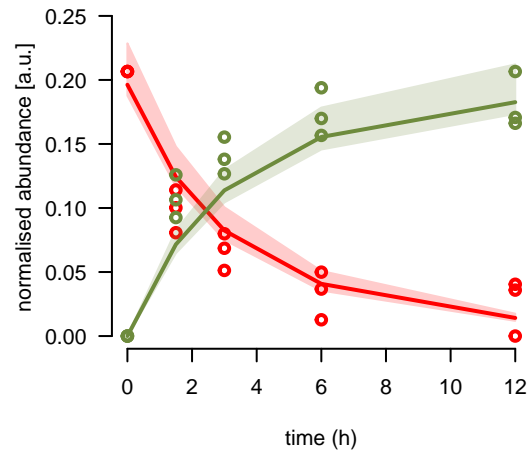**fraction: 4**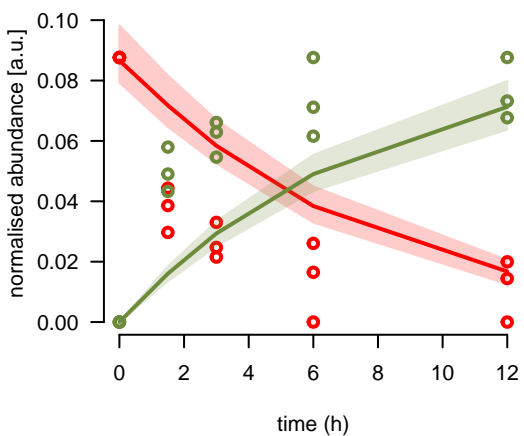**fraction: 5**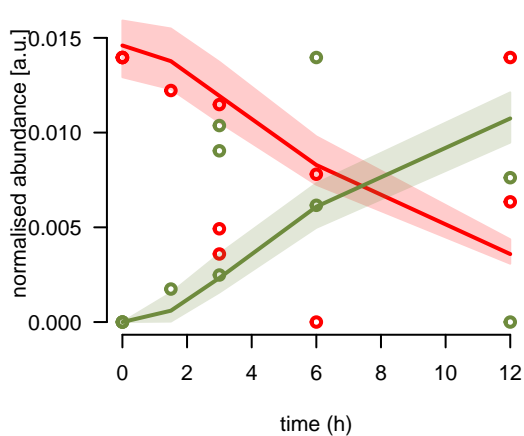**fraction: 6**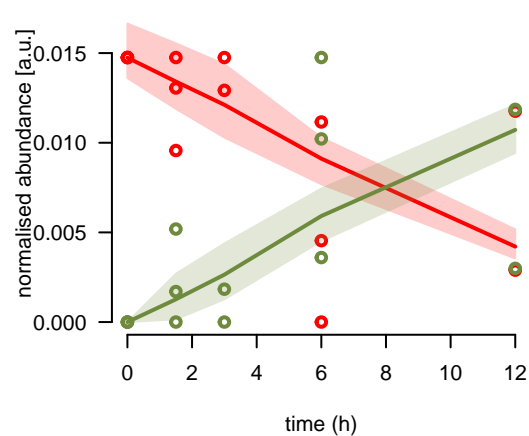**fraction: 7**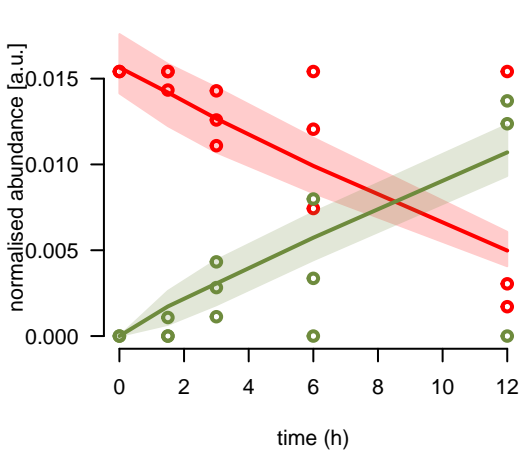**fraction: 8**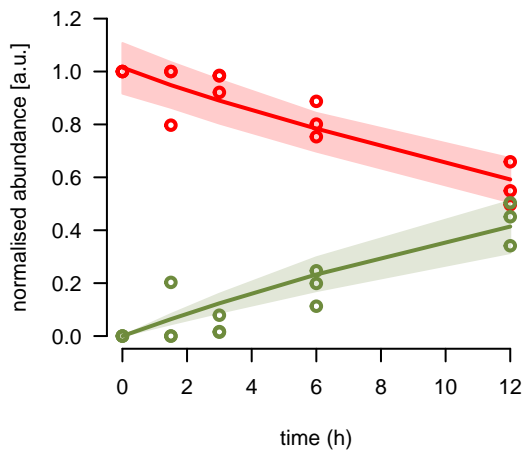**fraction: 9**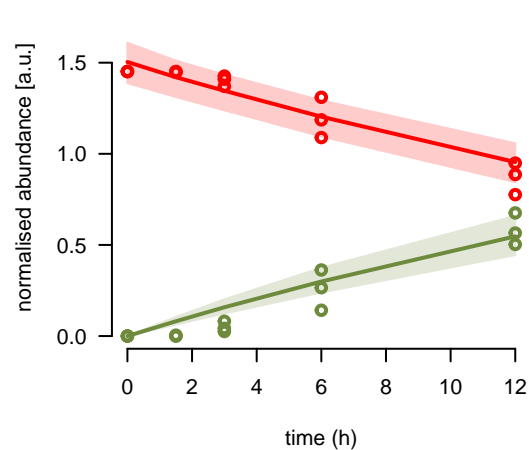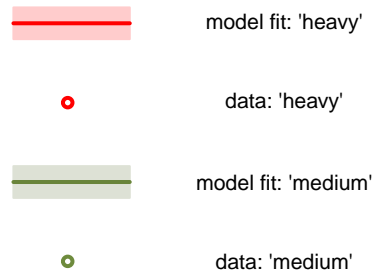**abundances**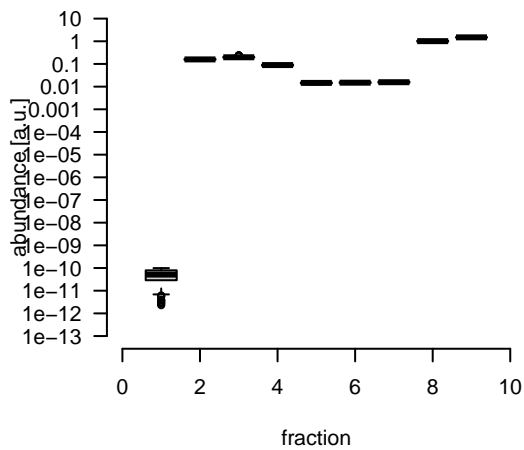**fluxes**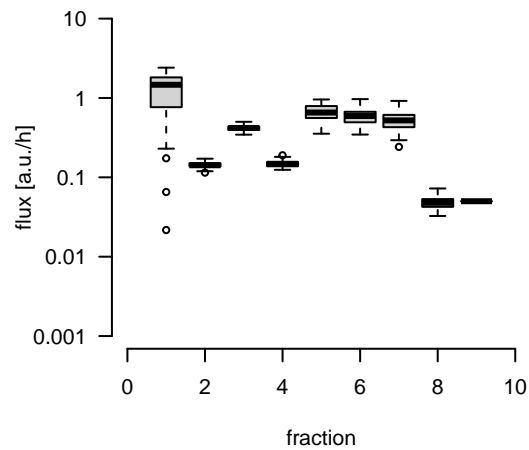

**bL9m fraction: 1****fraction: 2**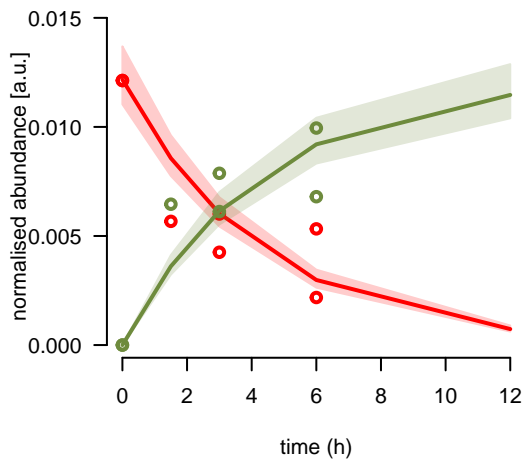**fraction: 3**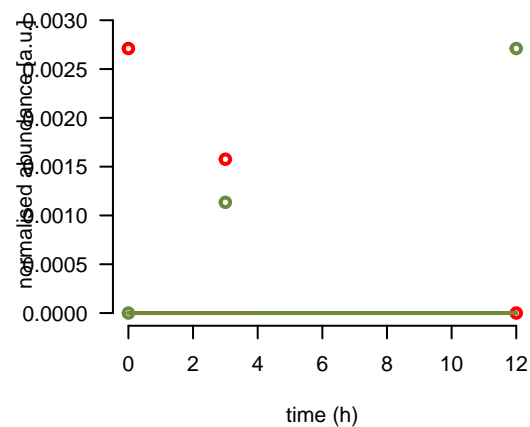**fraction: 4**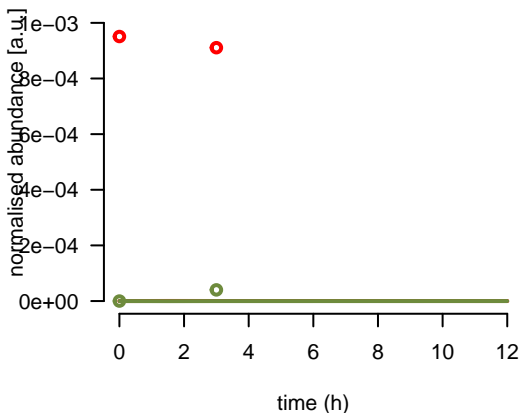**fraction: 5**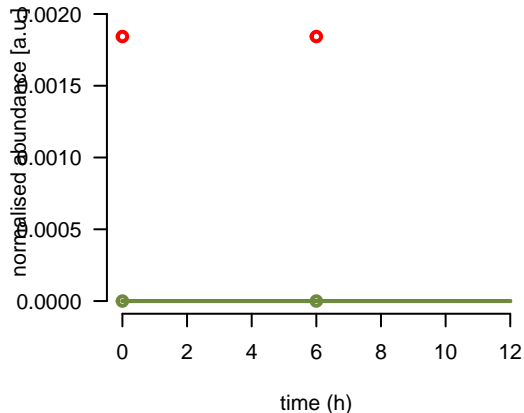**fraction: 6**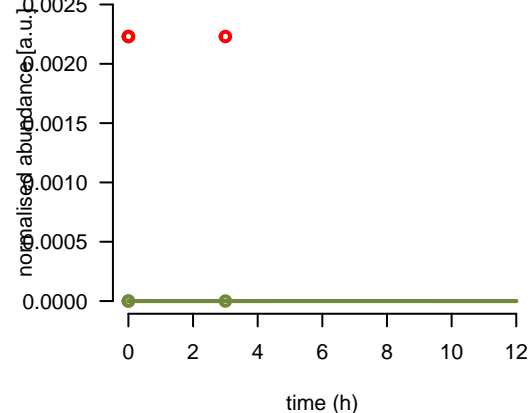**fraction: 7**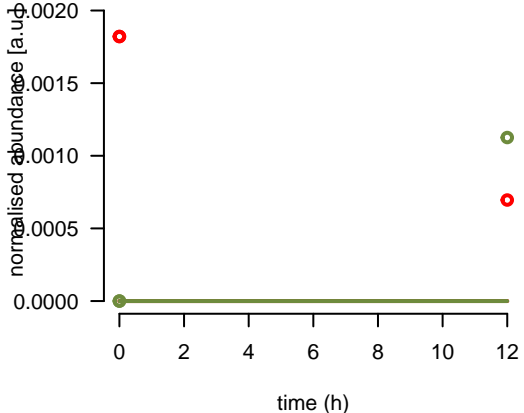**fraction: 8**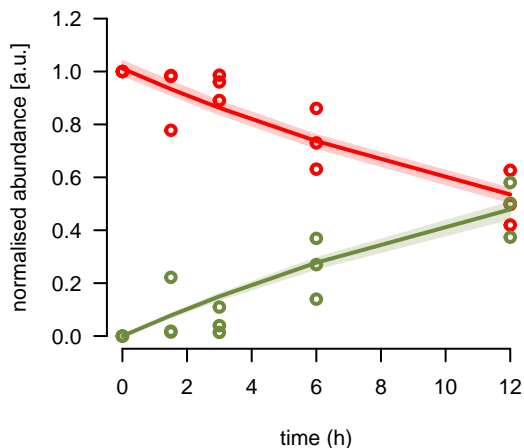**fraction: 9**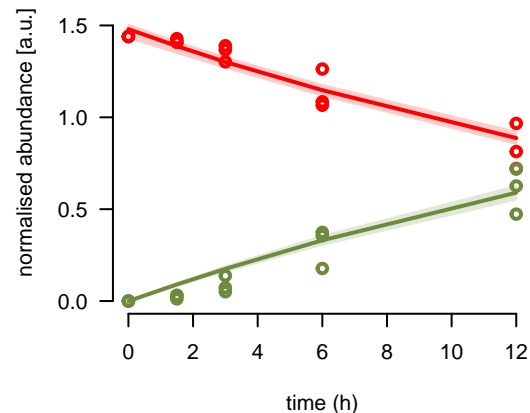**abundances**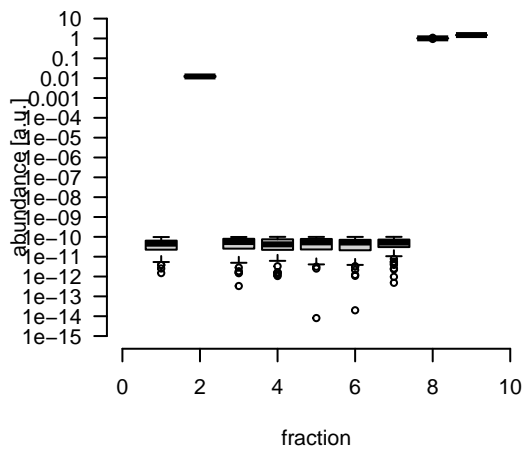**fluxes**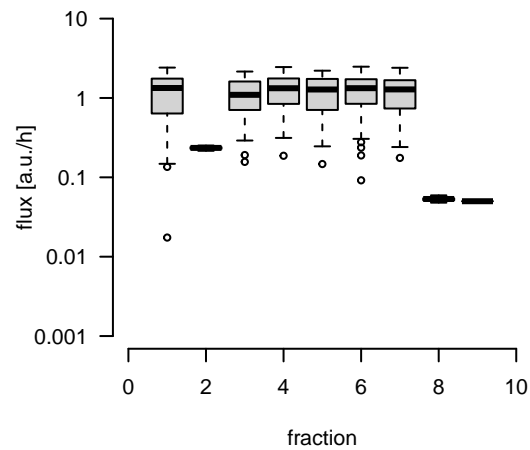

**uL10m fraction: 1**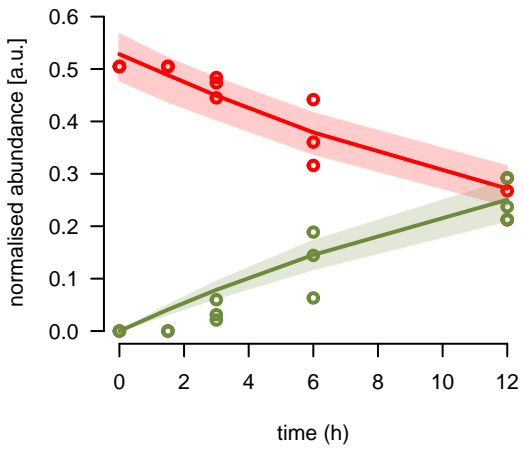**fraction: 2**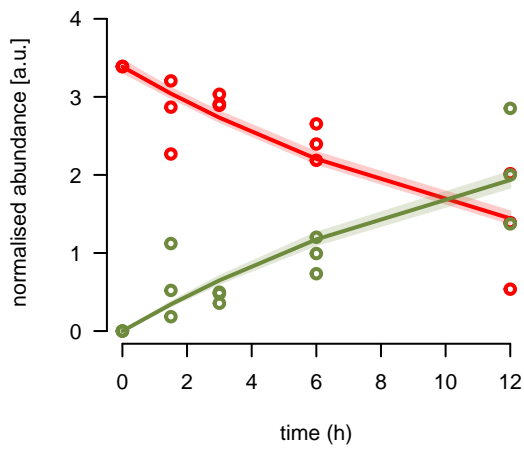**fraction: 3**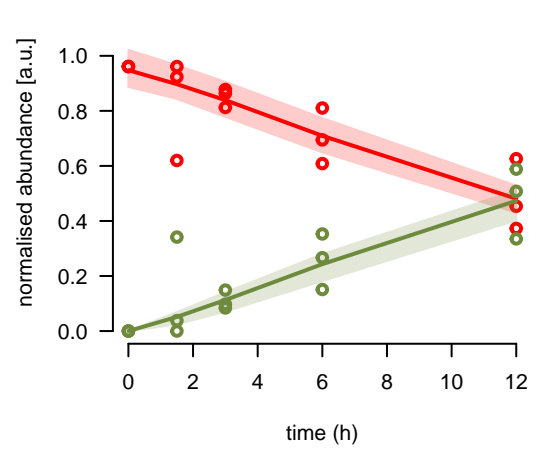**fraction: 4**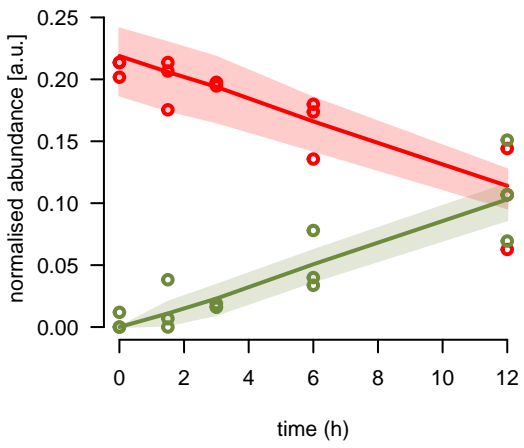**fraction: 5**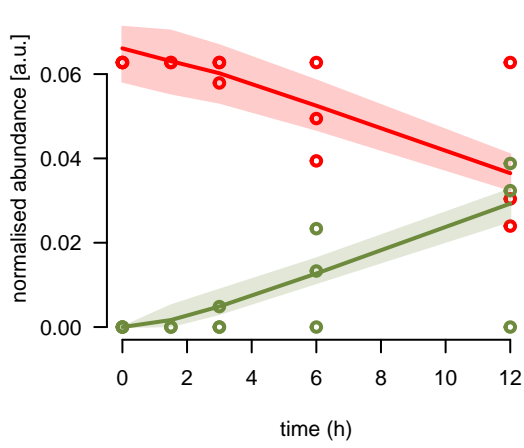**fraction: 6**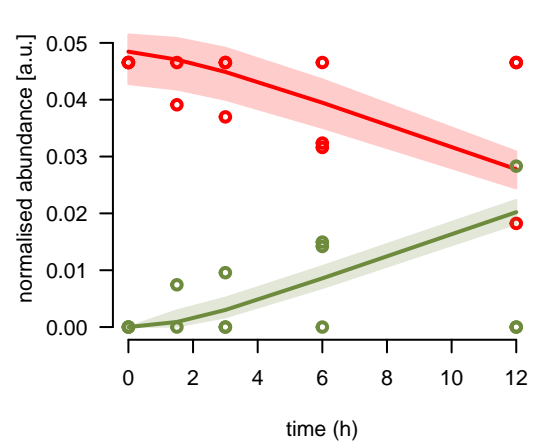**fraction: 7**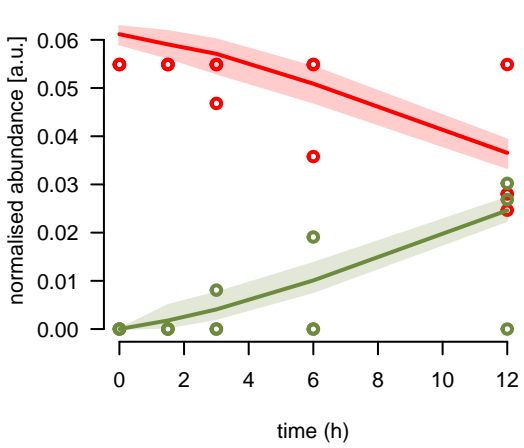**fraction: 8**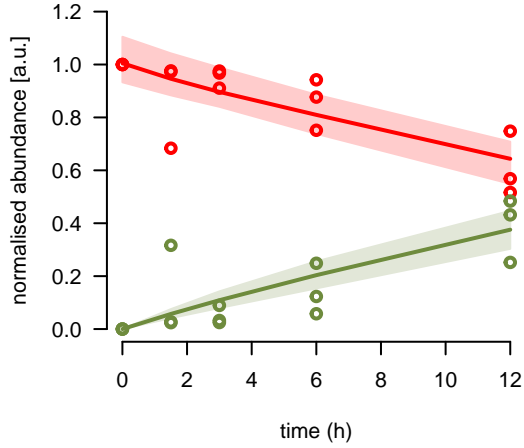**fraction: 9**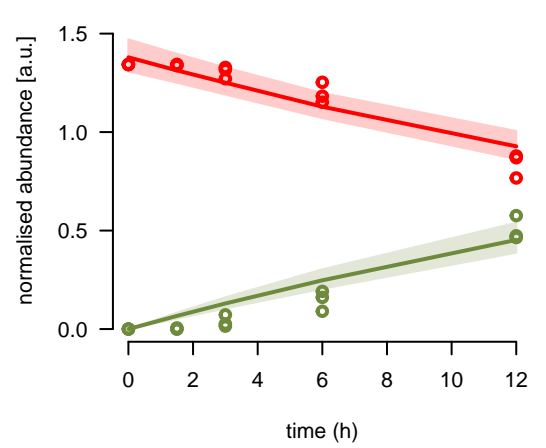**abundances**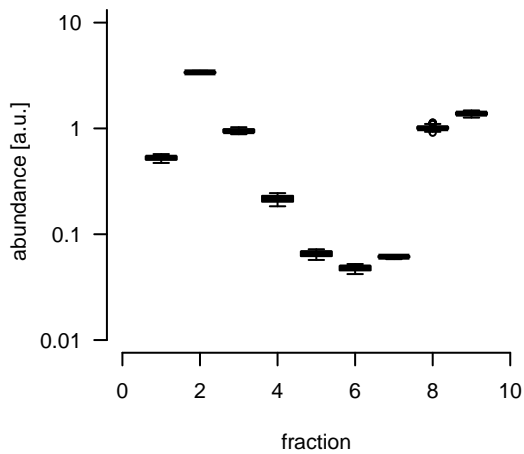**fluxes**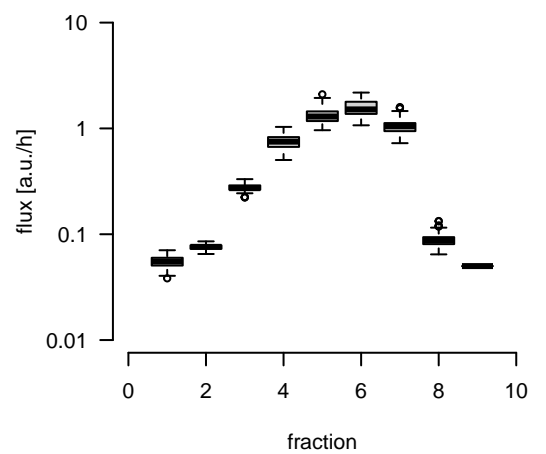

**uL11m fraction: 1**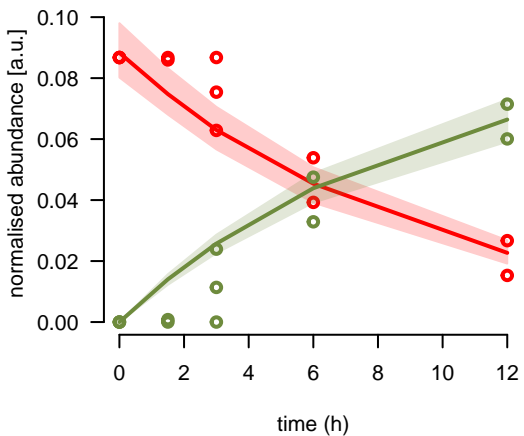**fraction: 2**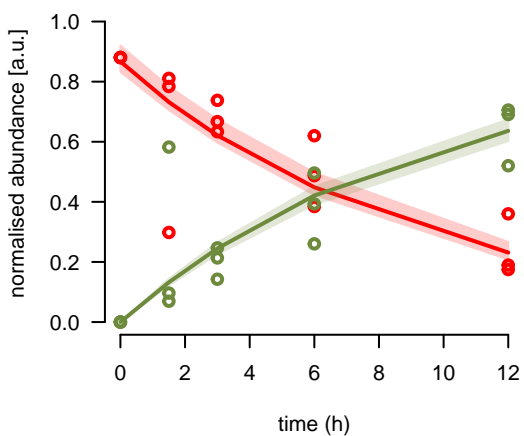**fraction: 3**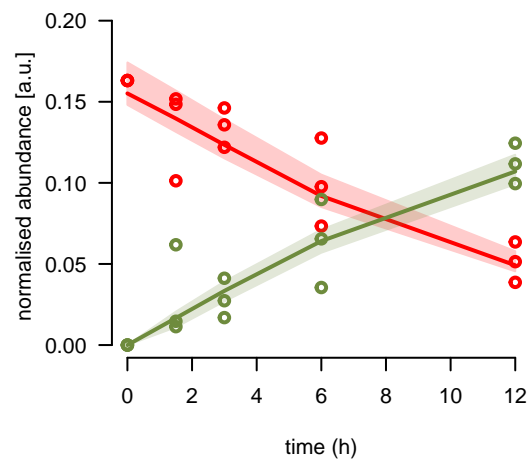**fraction: 4**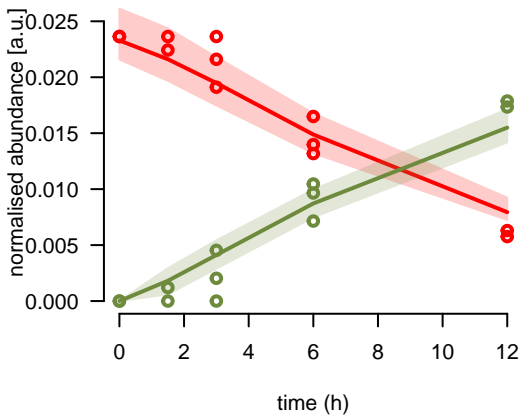**fraction: 5**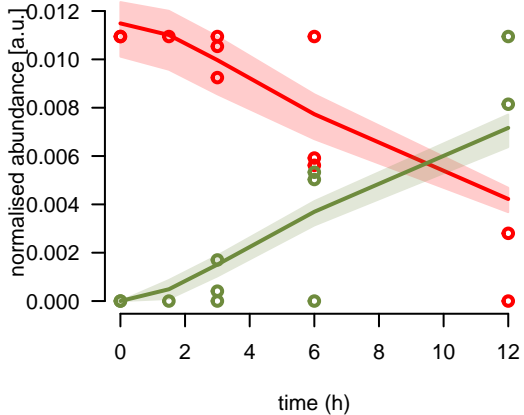**fraction: 6**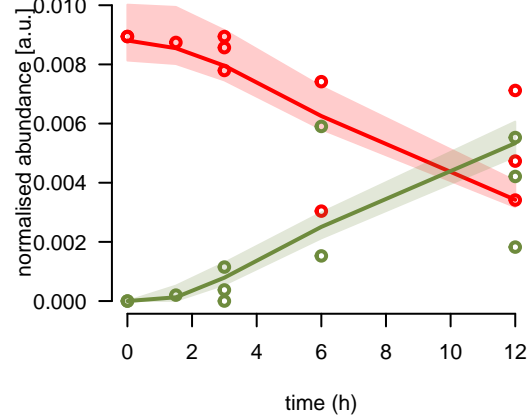**fraction: 7**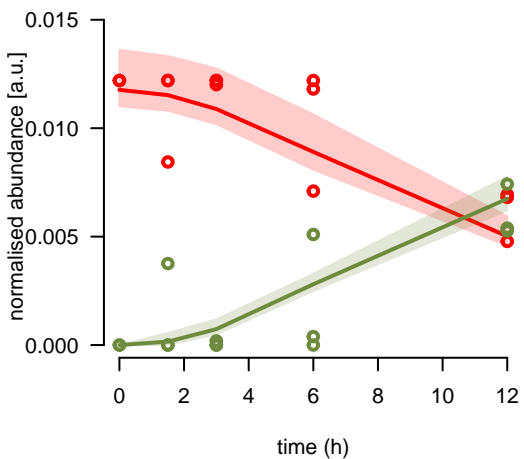**fraction: 8**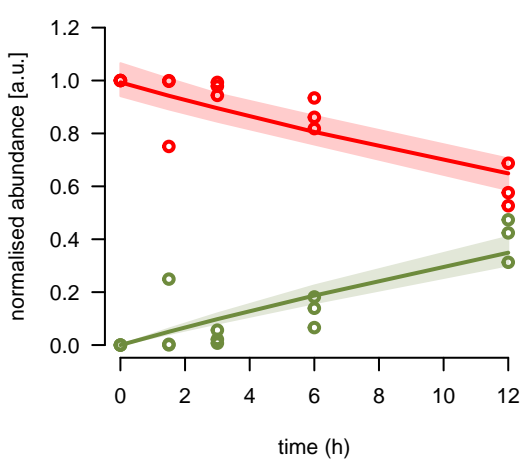**fraction: 9**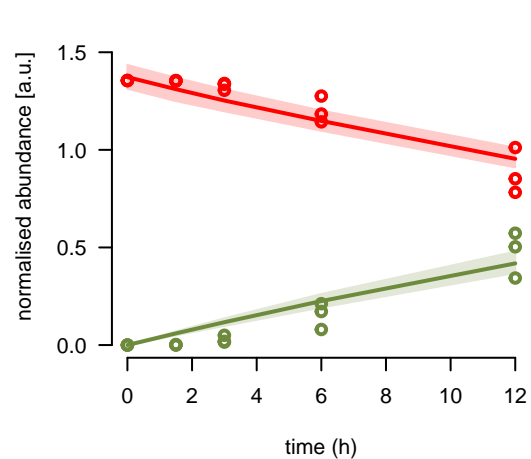**abundances**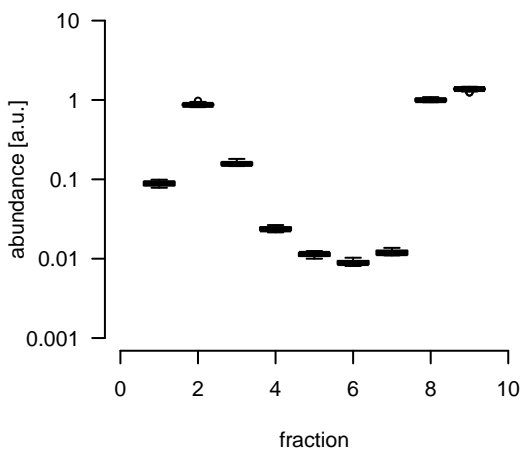**fluxes**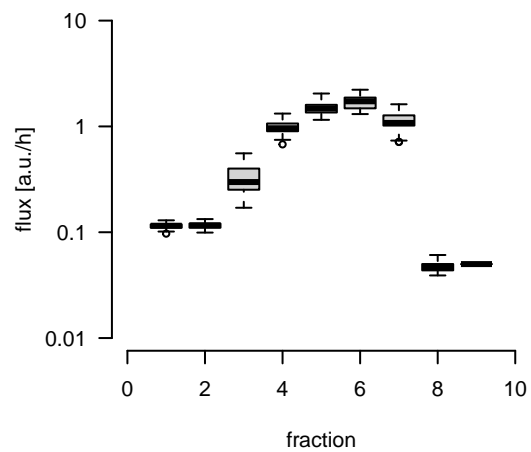

**bl12m fraction: 1**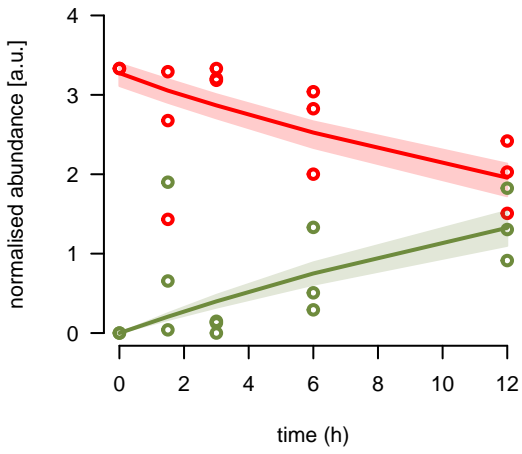**fraction: 2**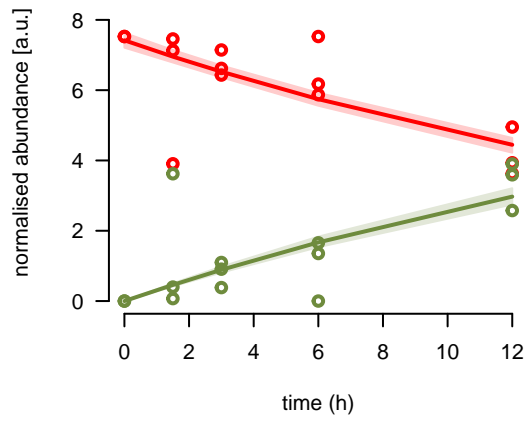**fraction: 3**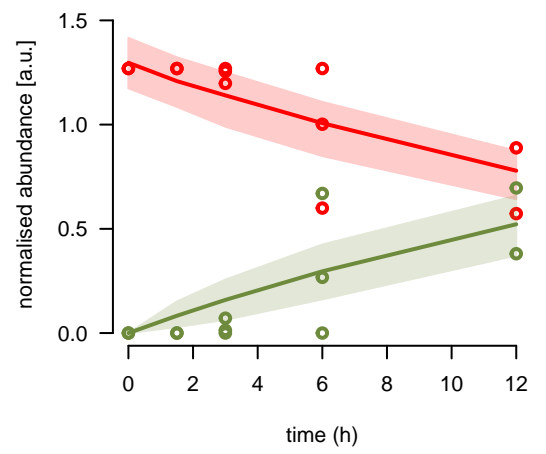**fraction: 4**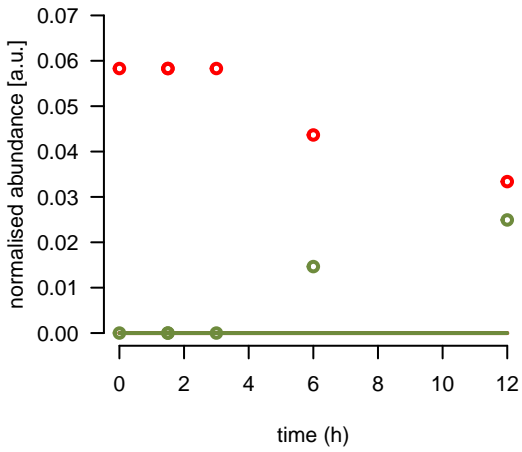**fraction: 5**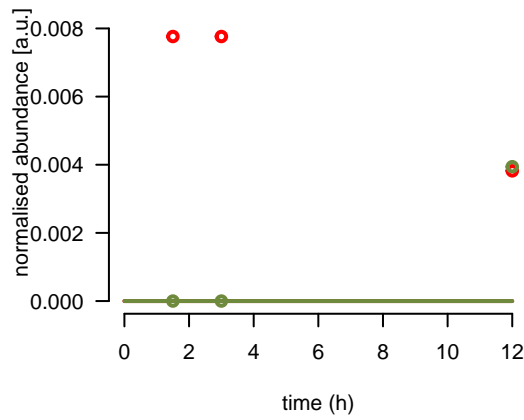**fraction: 6**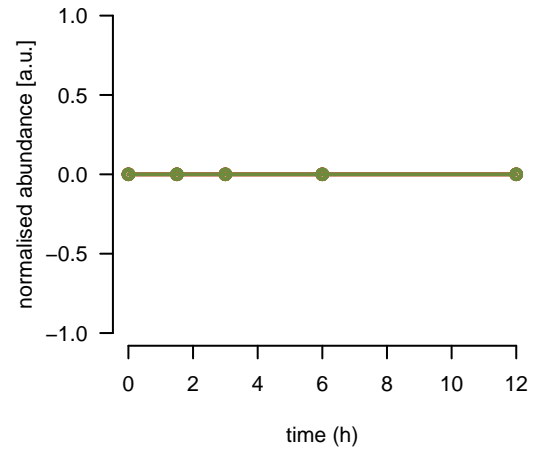**fraction: 7**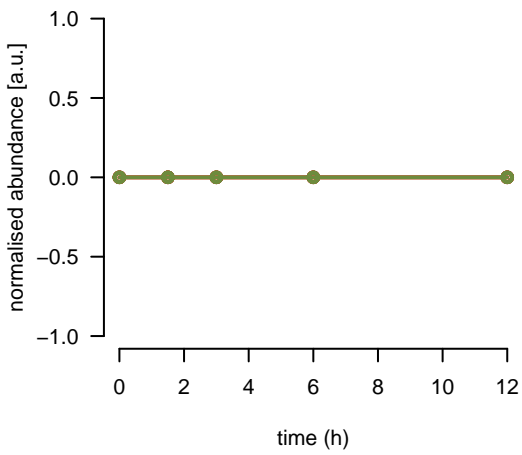**fraction: 8**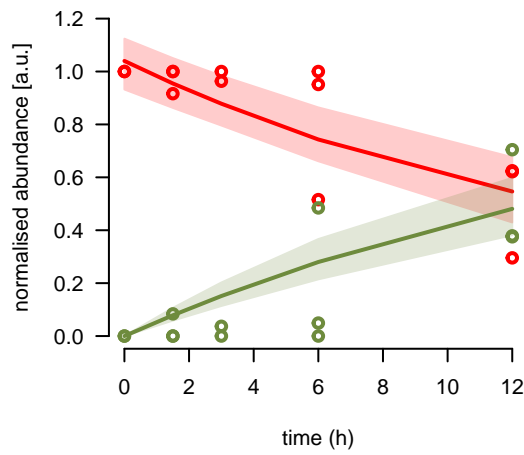**fraction: 9**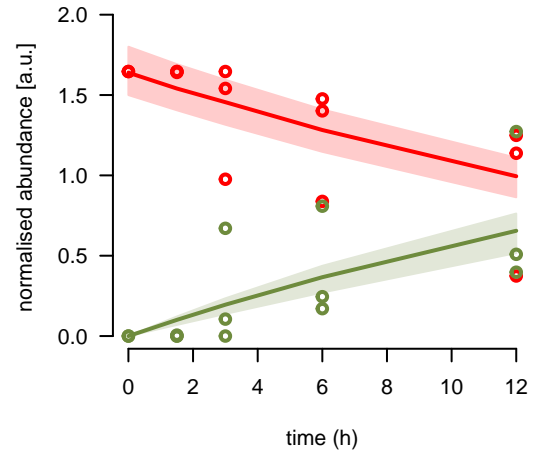**abundances**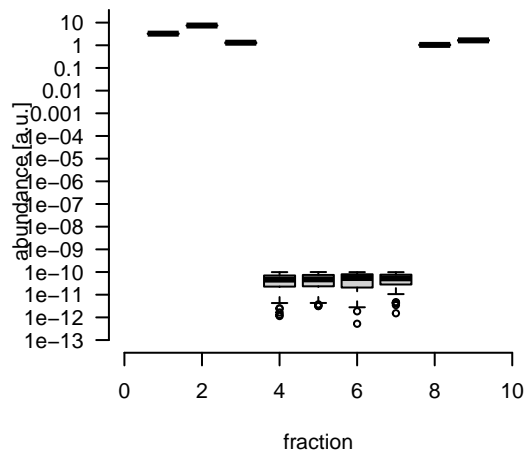**fluxes**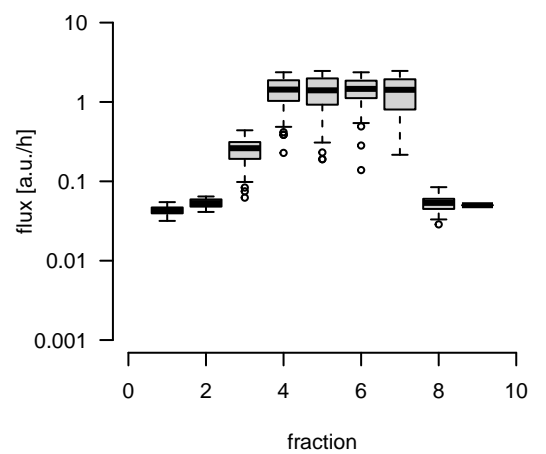



**uL13m fraction: 1**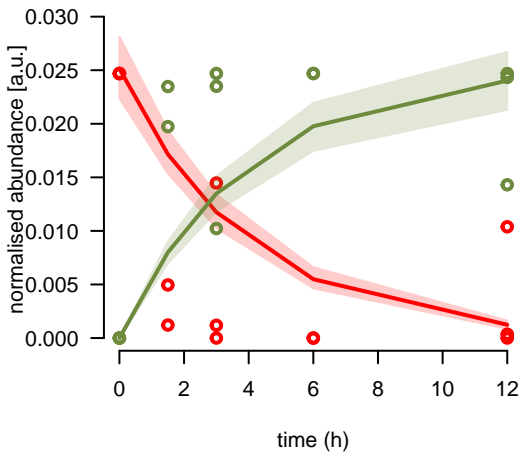**fraction: 2**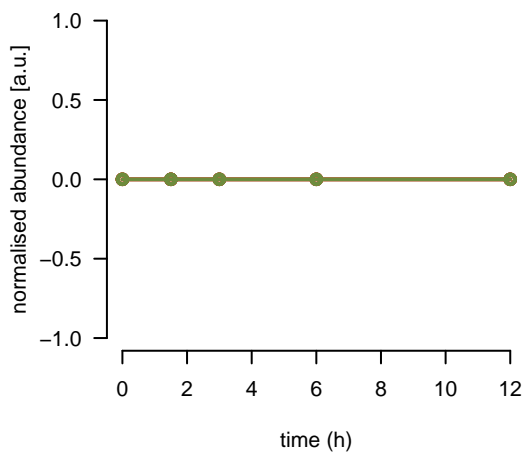**fraction: 3**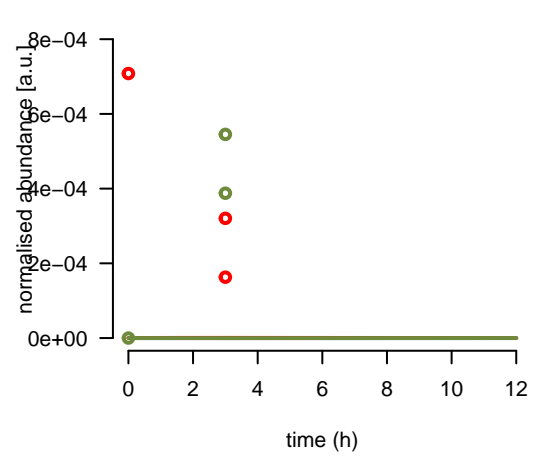**fraction: 4**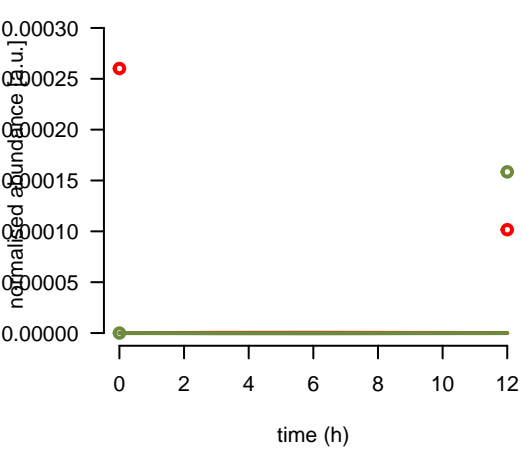**fraction: 5**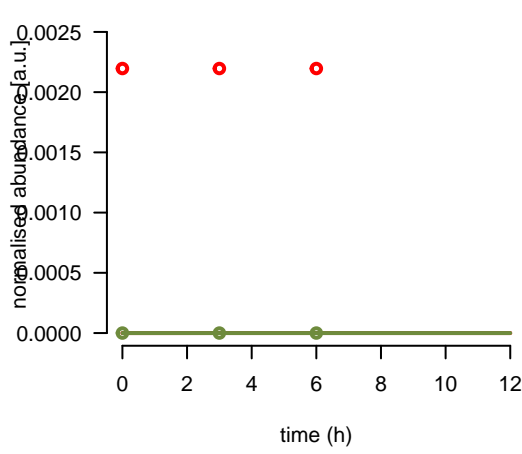**fraction: 6**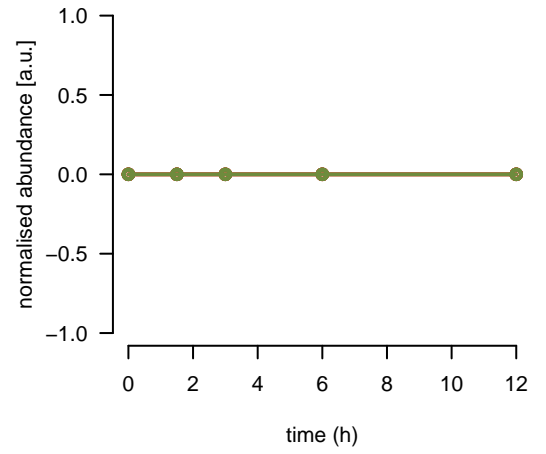**fraction: 7**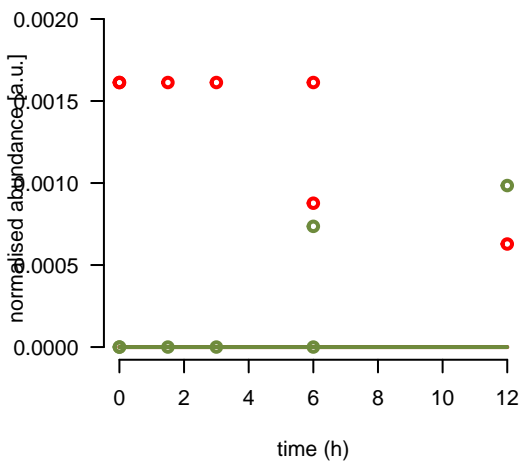**fraction: 8**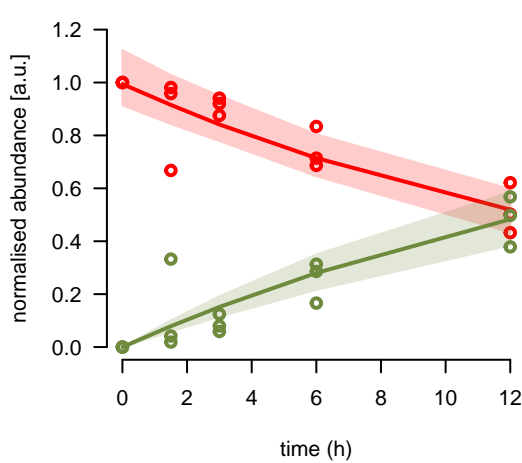**fraction: 9**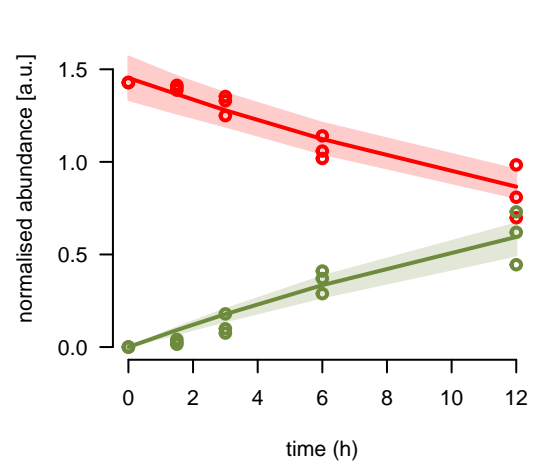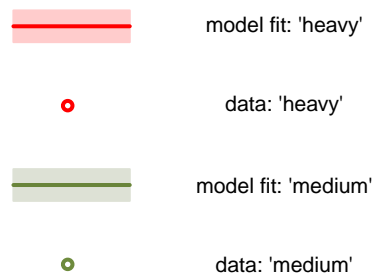**abundances**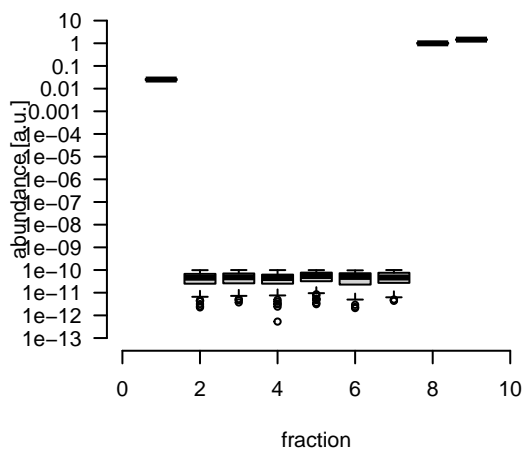**fluxes**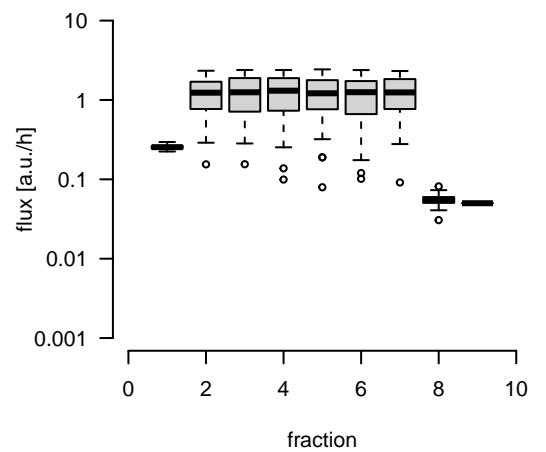

**uL14m fraction: 1**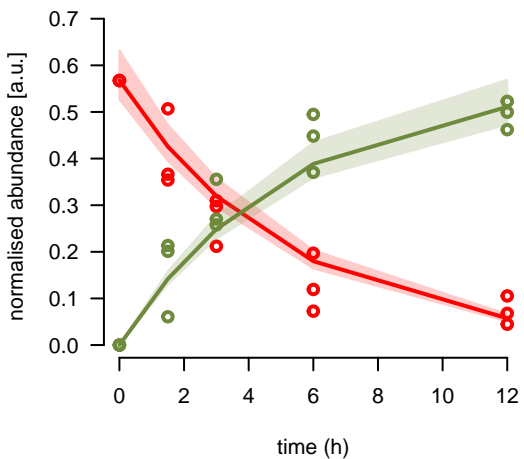**fraction: 2**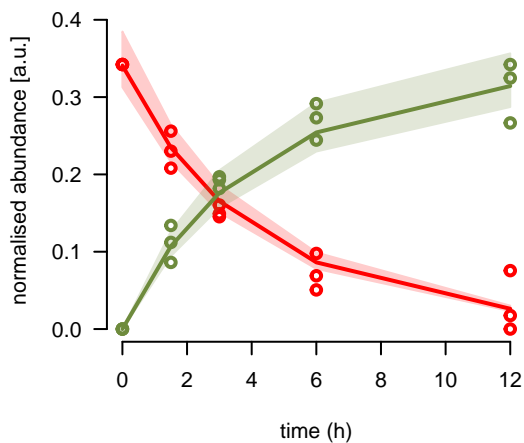**fraction: 3**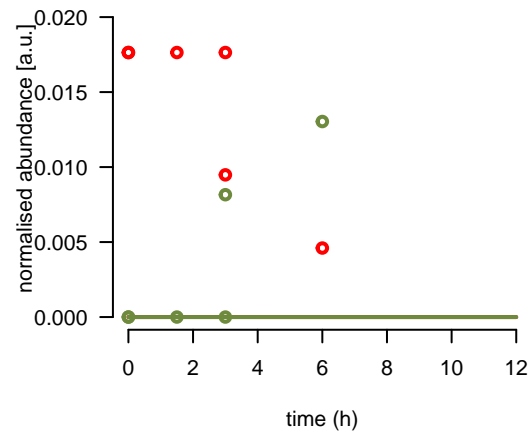**fraction: 4**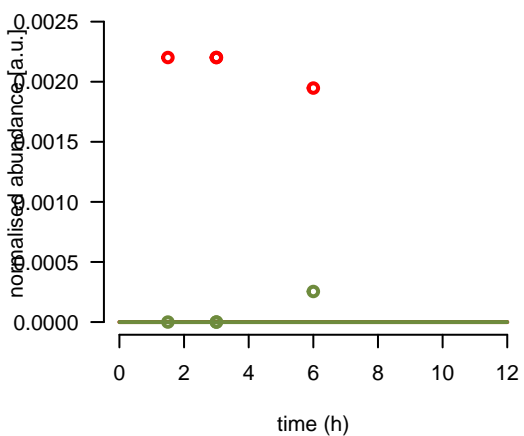**fraction: 5**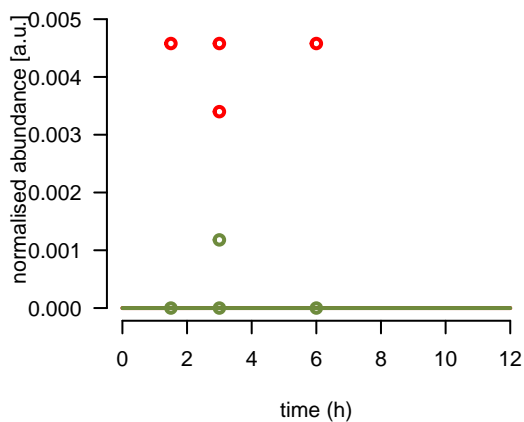**fraction: 6**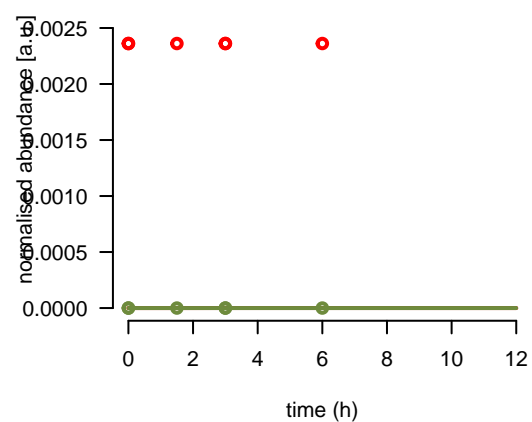**fraction: 7**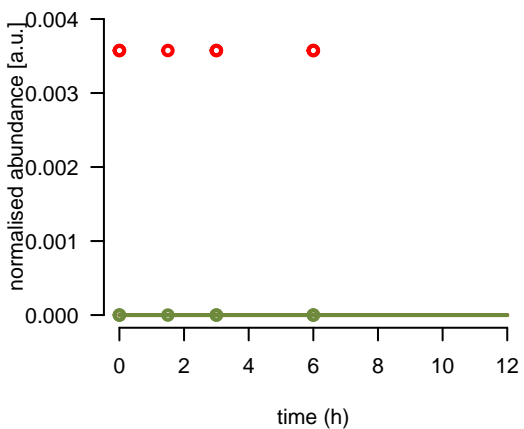**fraction: 8**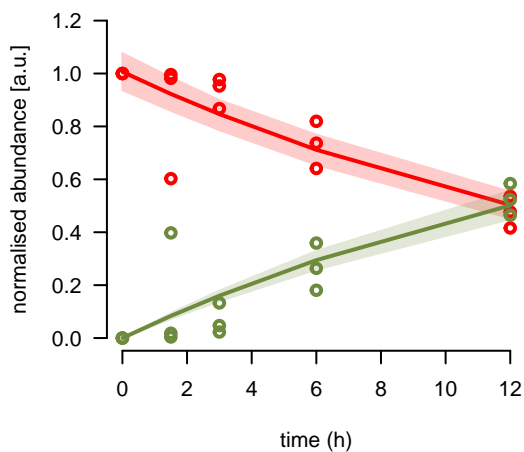**fraction: 9**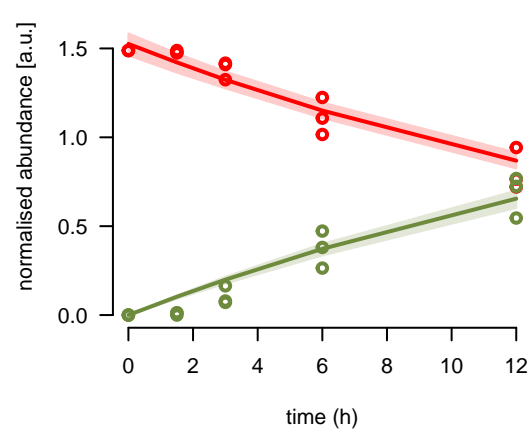**abundances**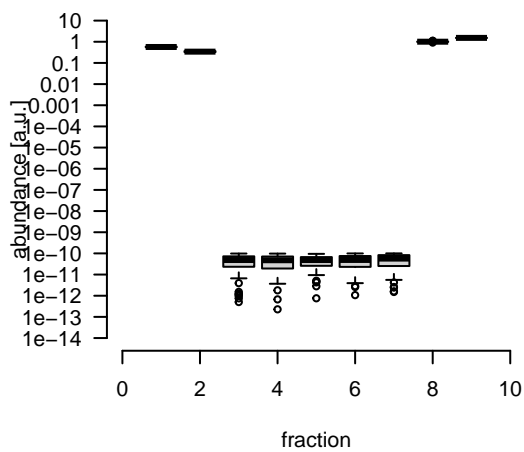**fluxes**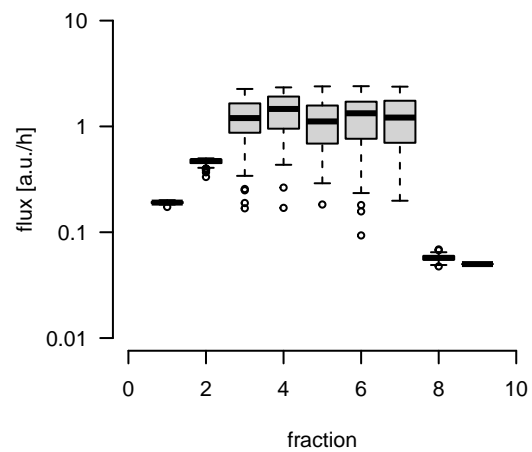

**uL15m fraction: 1**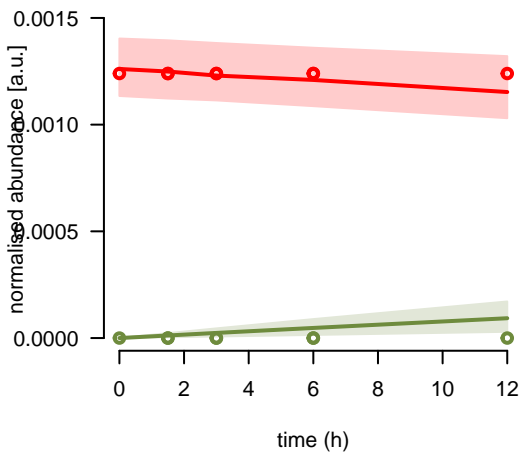**fraction: 2**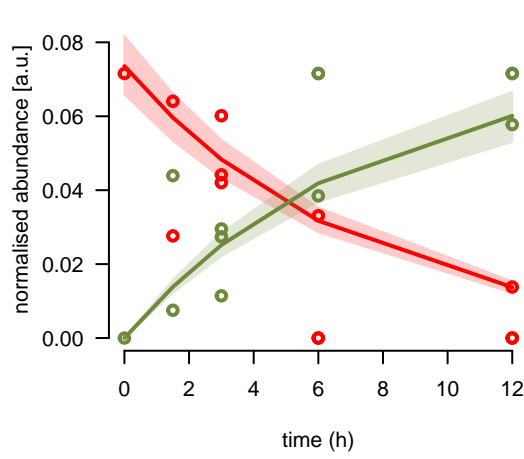**fraction: 3**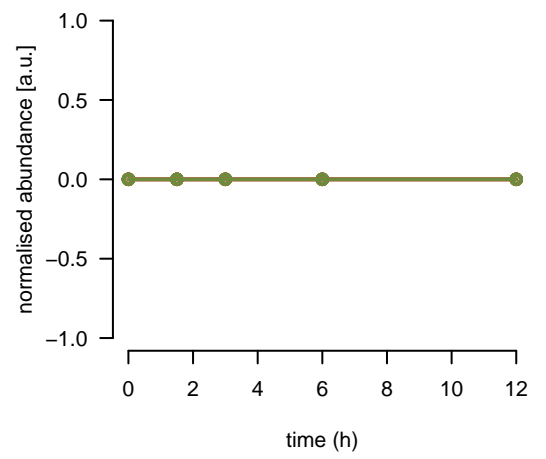**fraction: 4**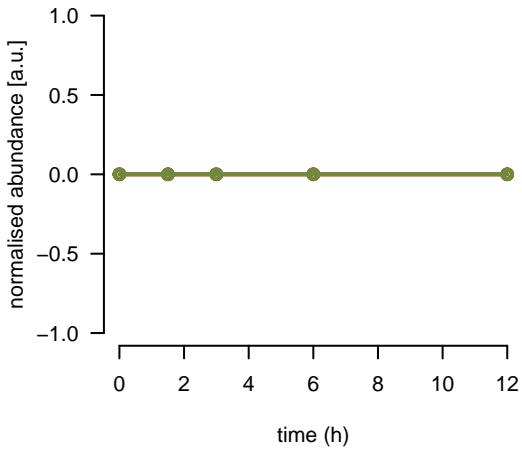**fraction: 5**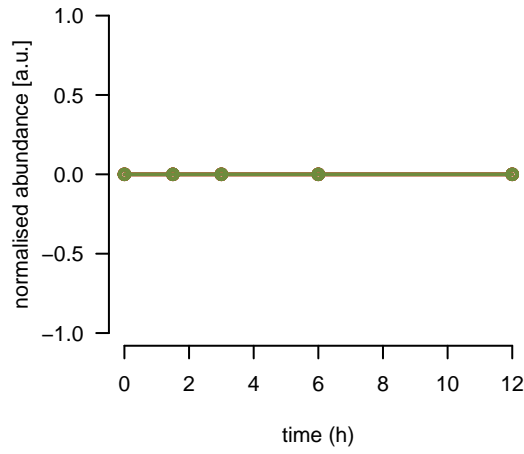**fraction: 6**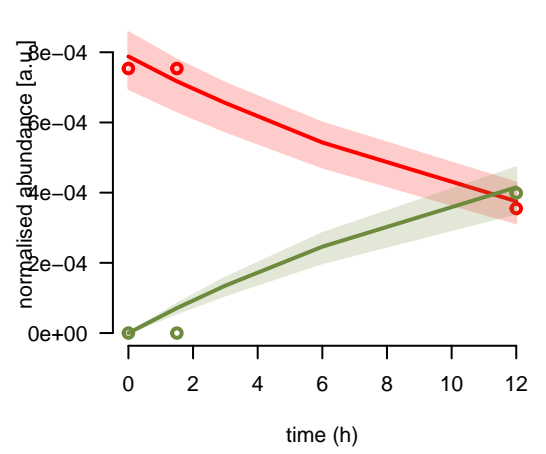**fraction: 7**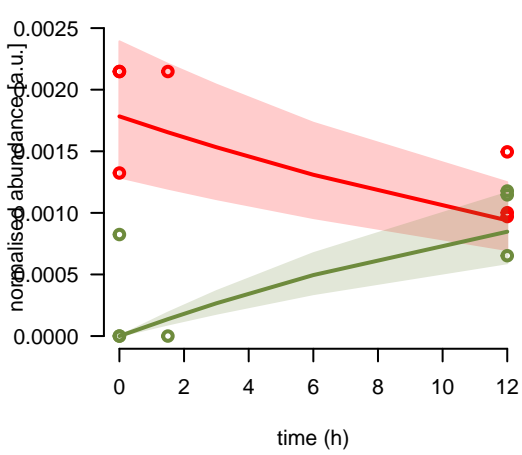**fraction: 8**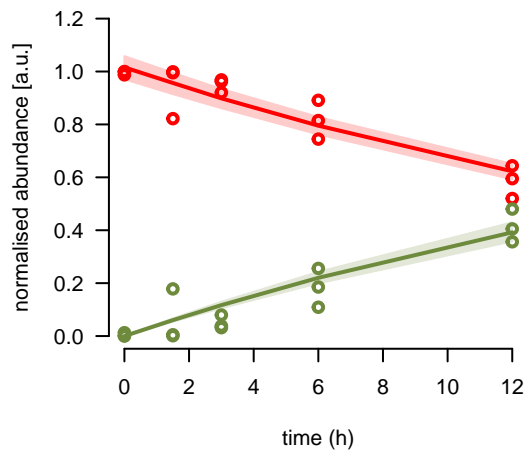**fraction: 9**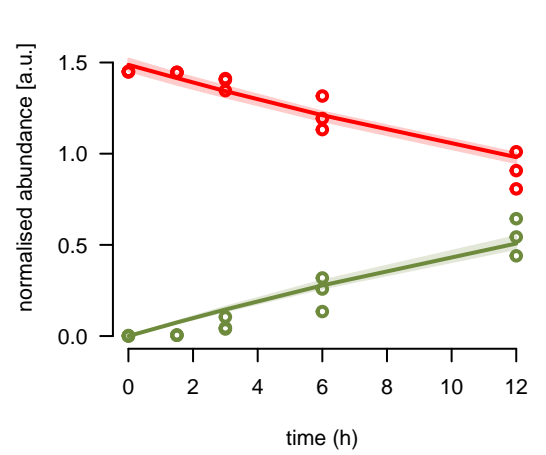**abundances**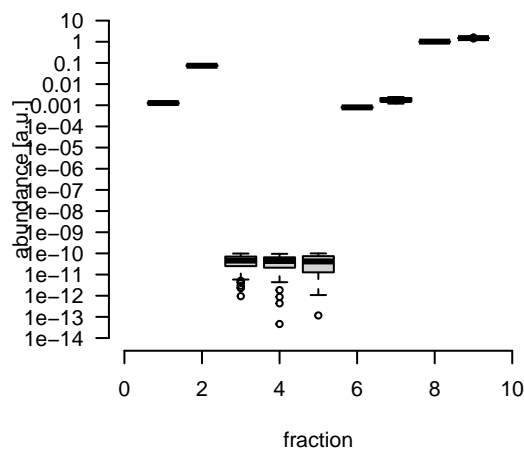**fluxes**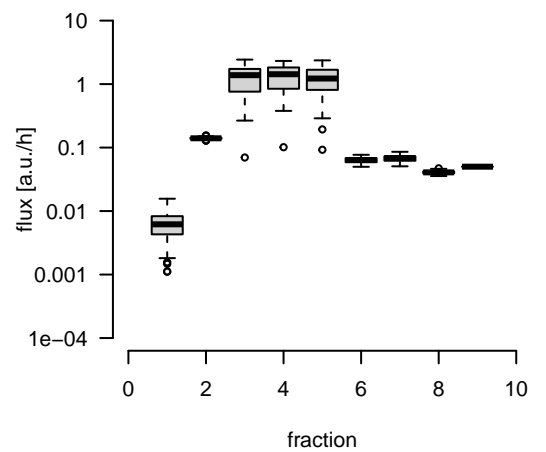

**uL16m fraction: 1**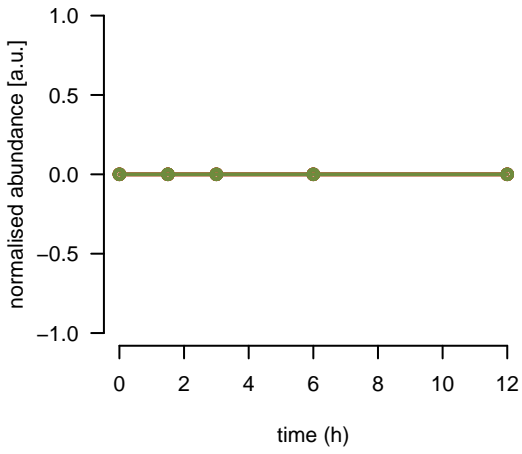**fraction: 2****fraction: 3****fraction: 4****fraction: 5**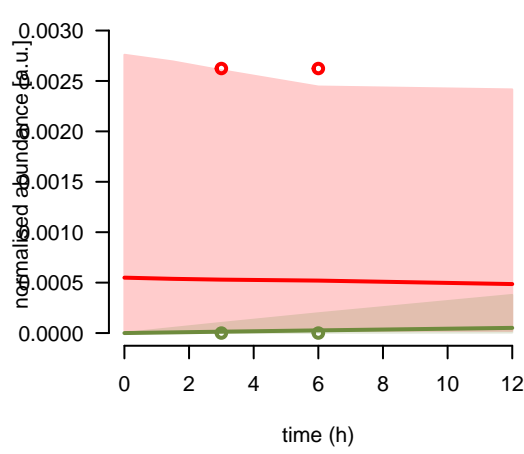**fraction: 6****fraction: 7****fraction: 8**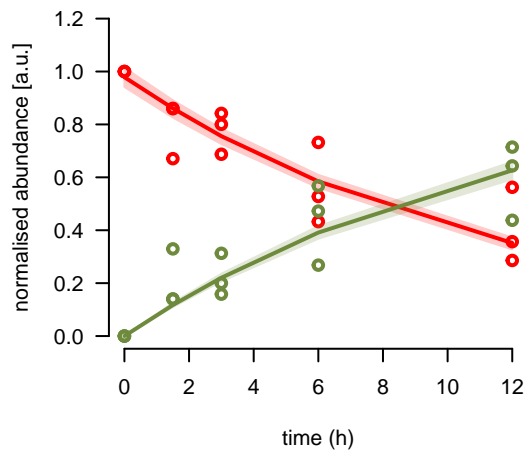**fraction: 9**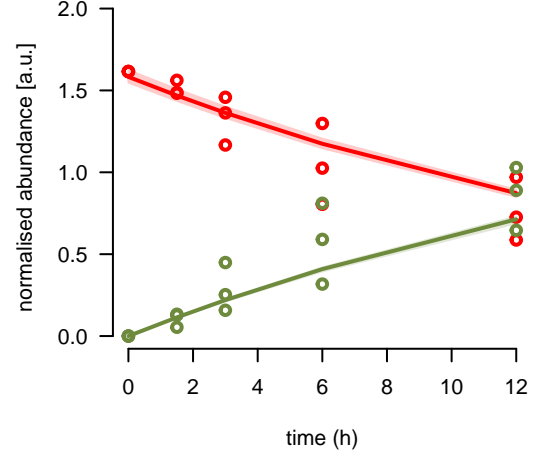**abundances**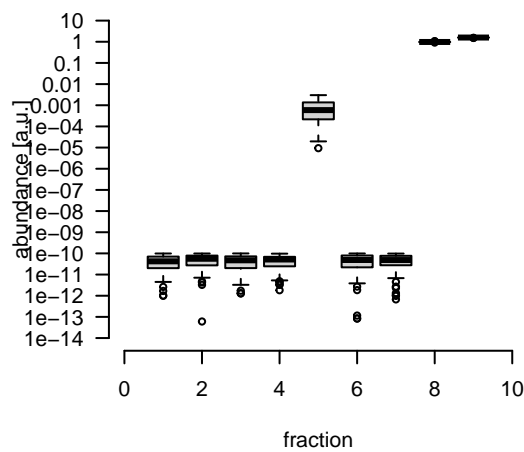**fluxes**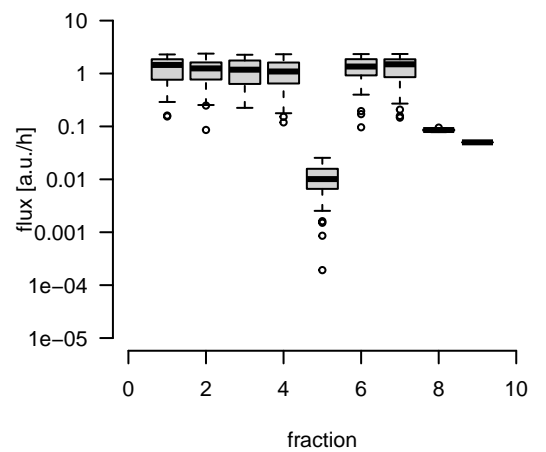

**bl17m fraction: 1**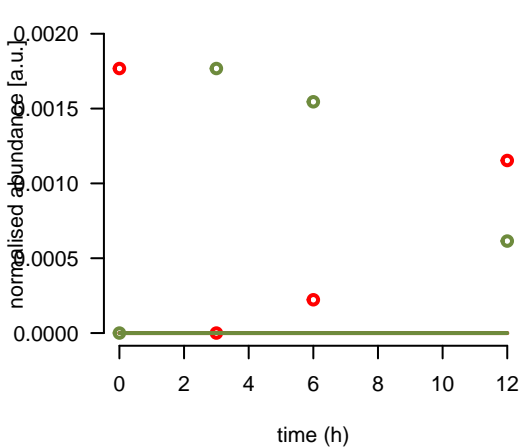**fraction: 2**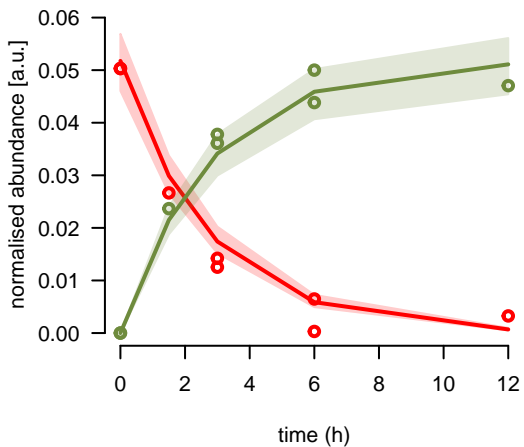**fraction: 3**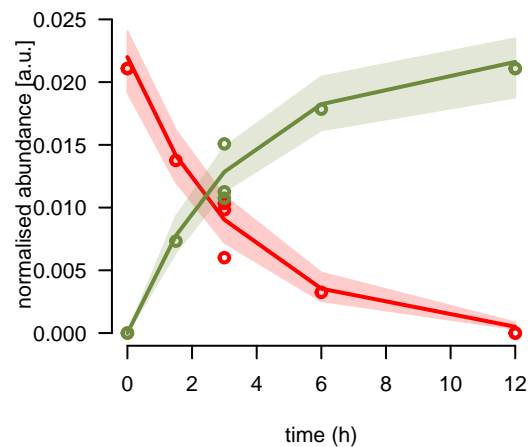**fraction: 4**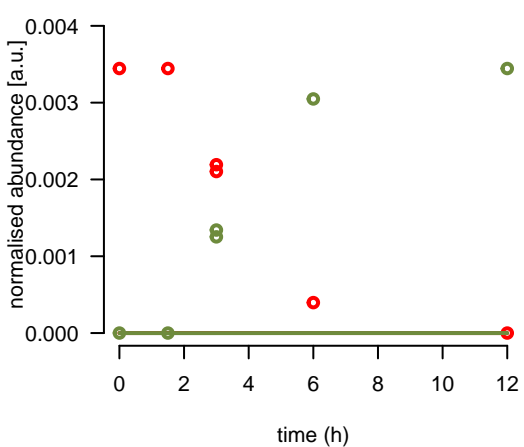**fraction: 5**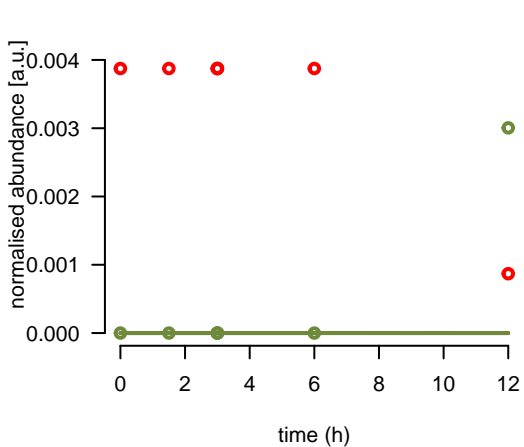**fraction: 6**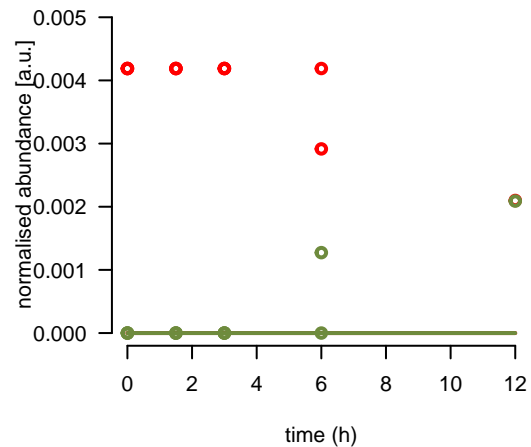**fraction: 7**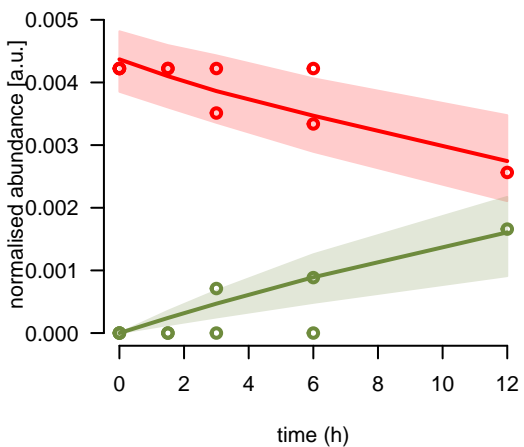**fraction: 8**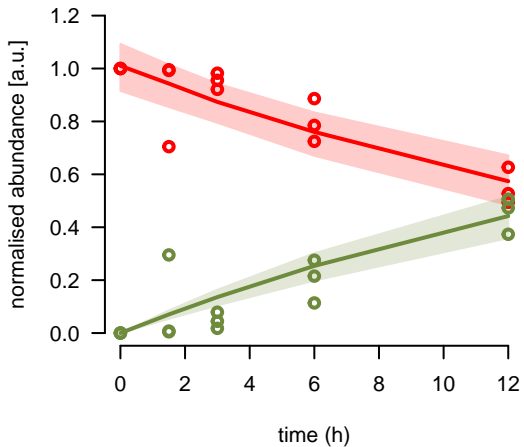**fraction: 9**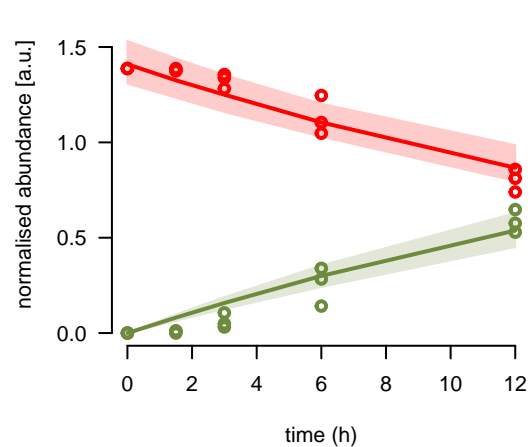**abundances**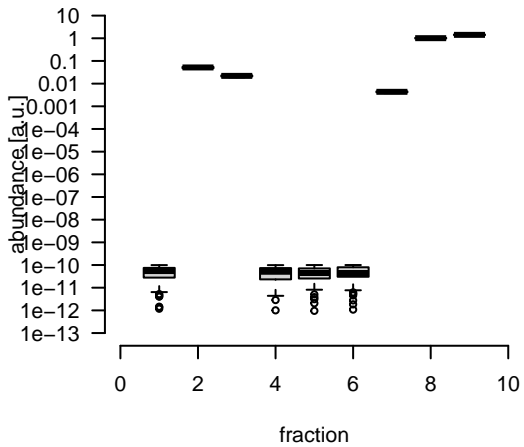**fluxes**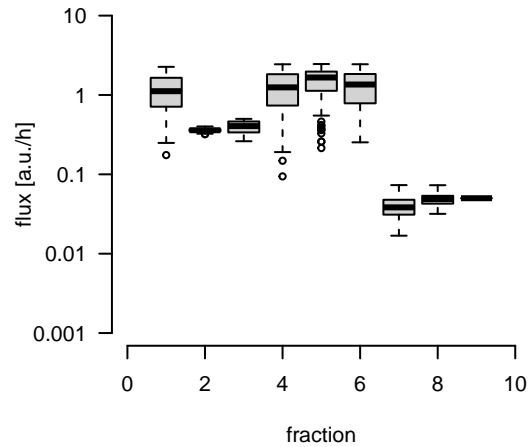

**uL18m fraction: 1****fraction: 2**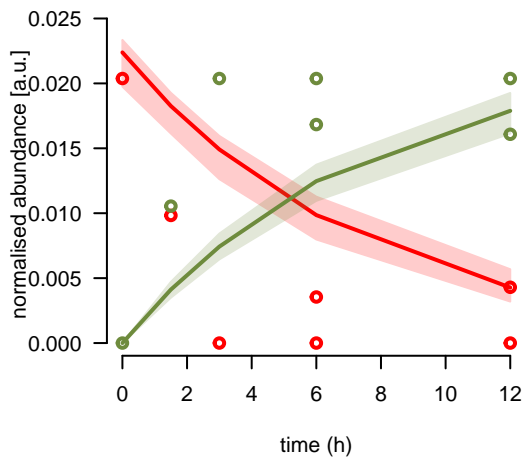**fraction: 3**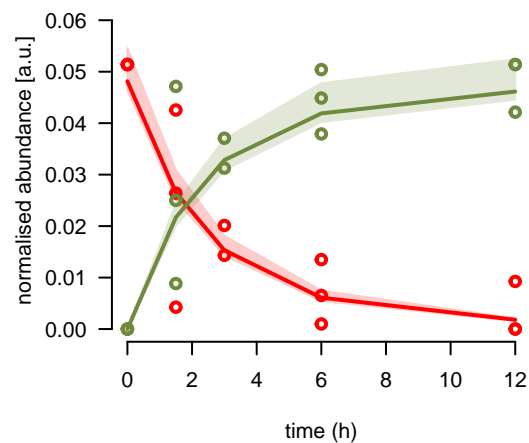**fraction: 4**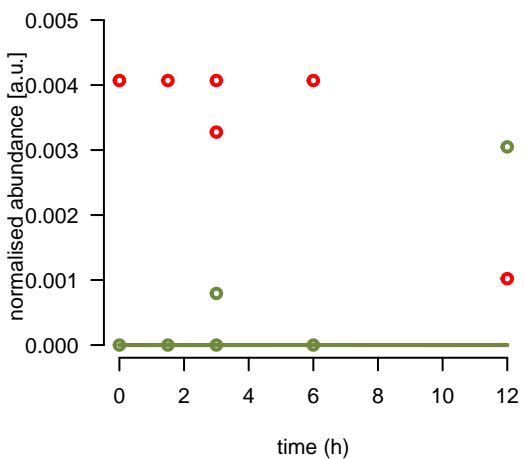**fraction: 5**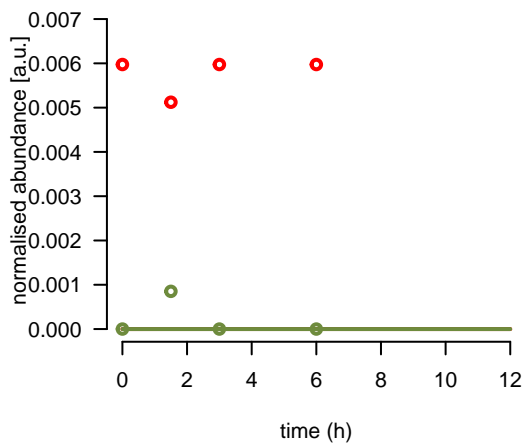**fraction: 6**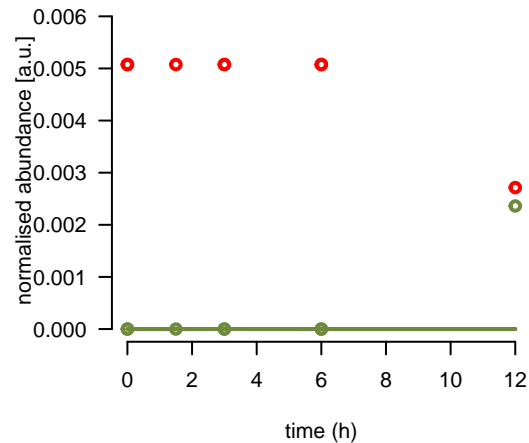**fraction: 7**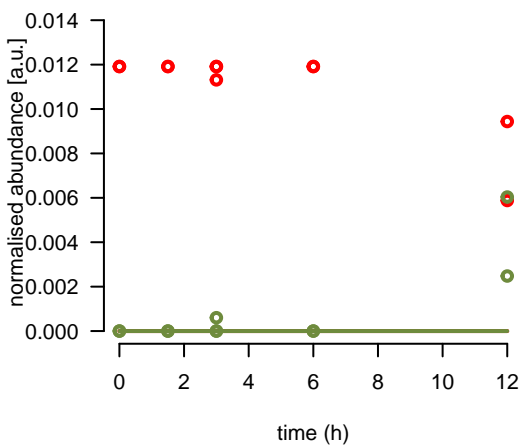**fraction: 8**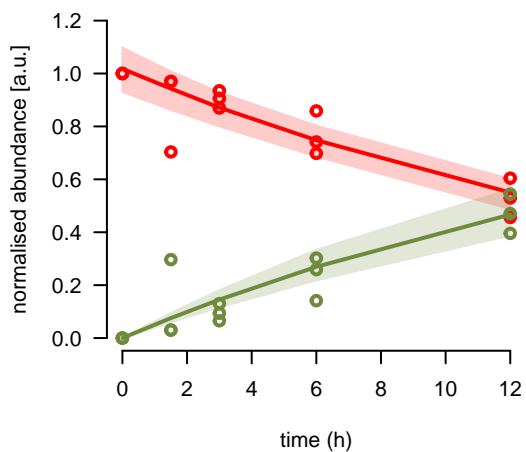**fraction: 9**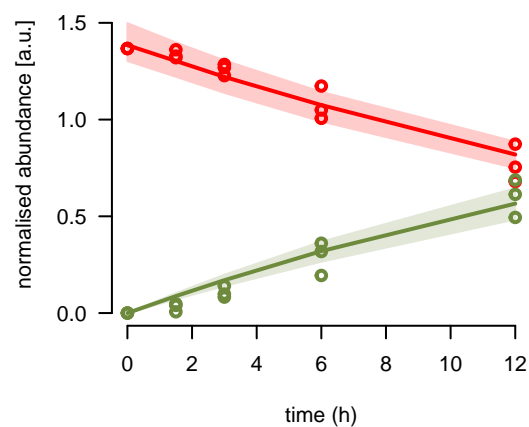**abundances**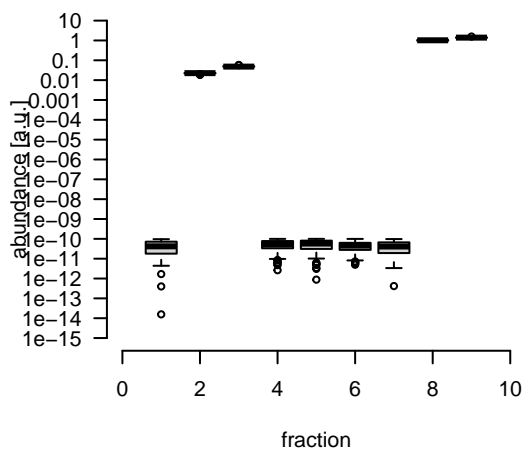**fluxes**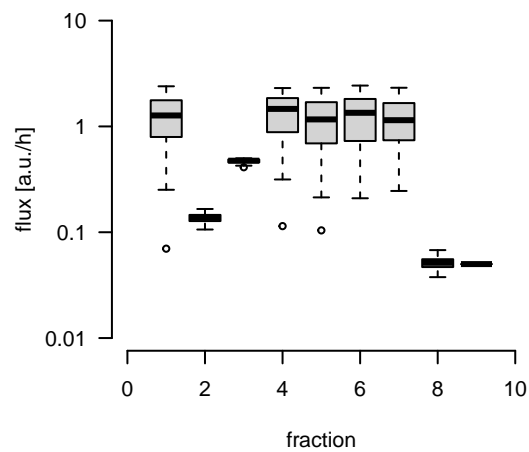

**blL19m fraction: 1**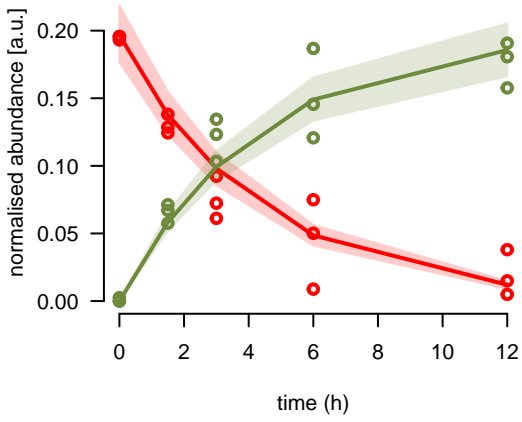**fraction: 2**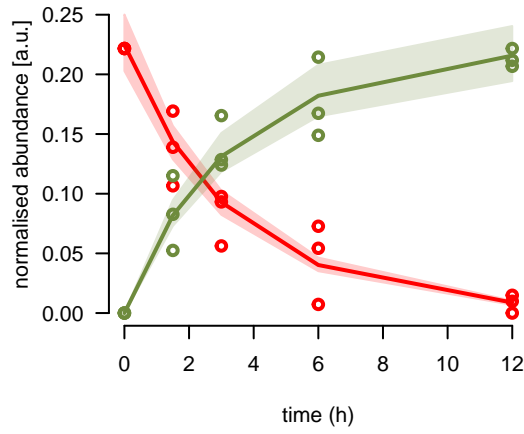**fraction: 3**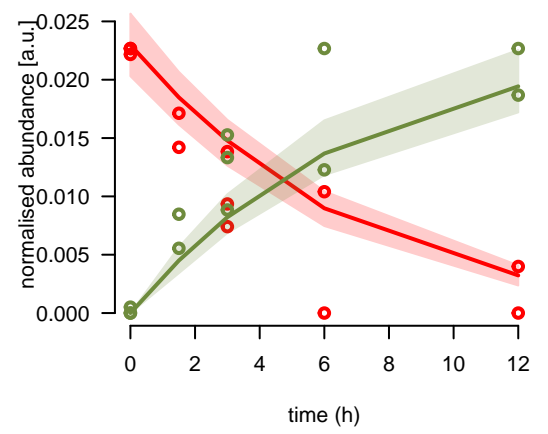**fraction: 4**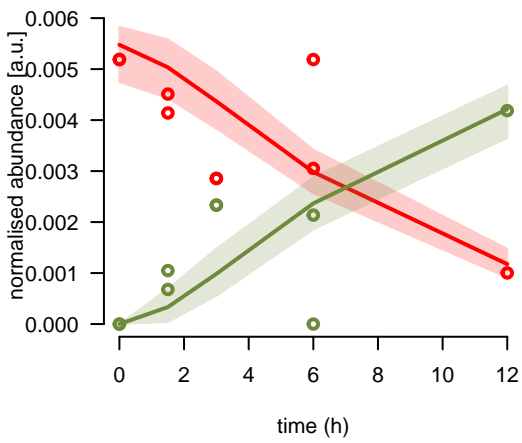**fraction: 5**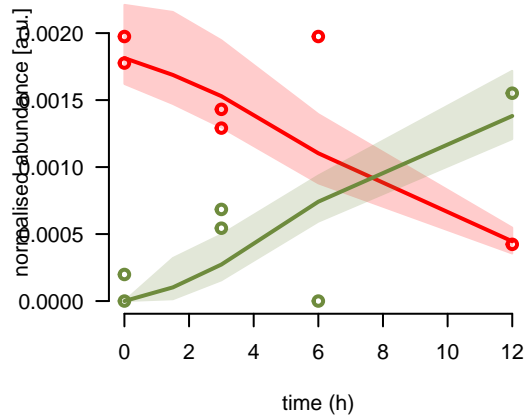**fraction: 6**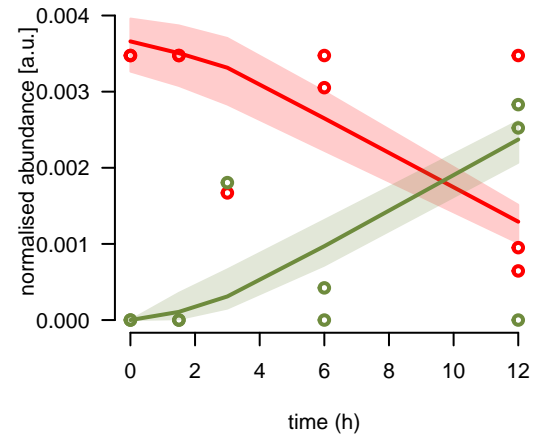**fraction: 7**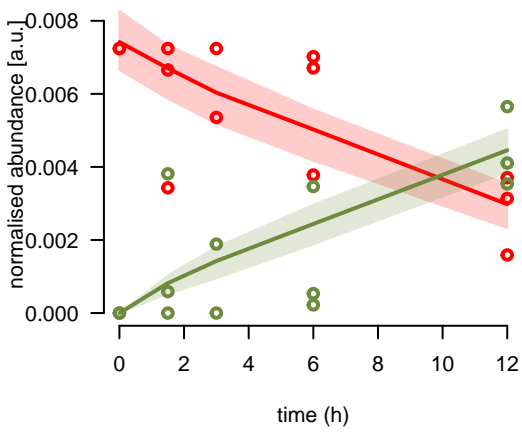**fraction: 8**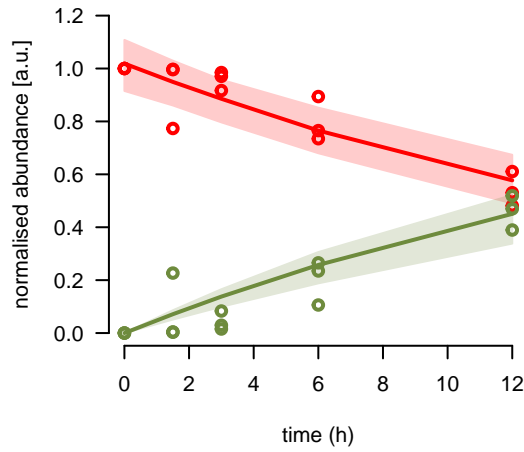**fraction: 9**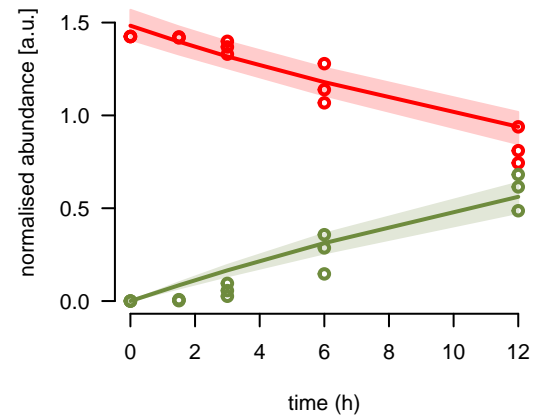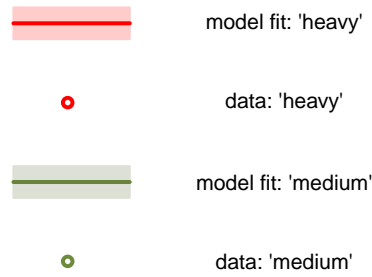**abundances**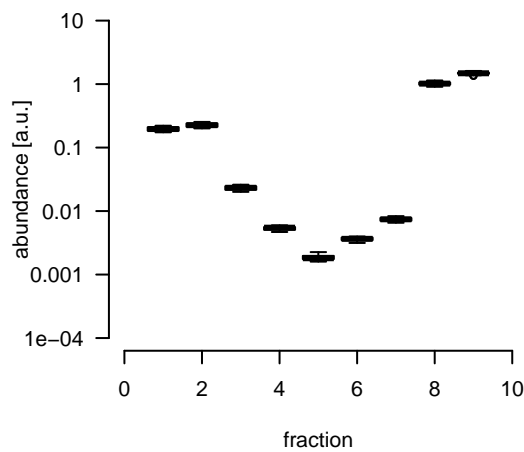**fluxes**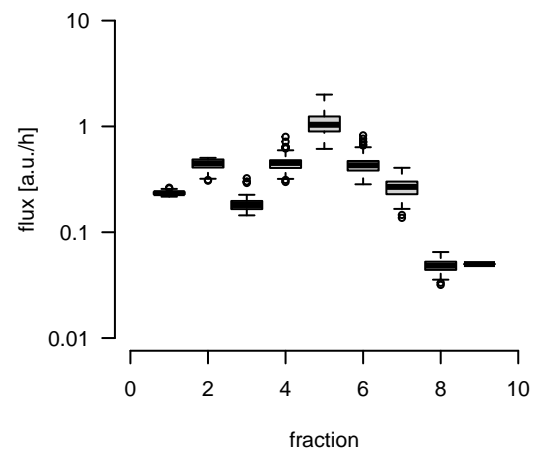

**bl20m fraction: 1****fraction: 2**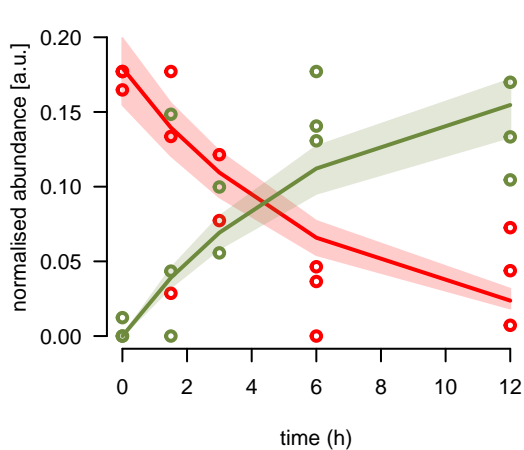**fraction: 3**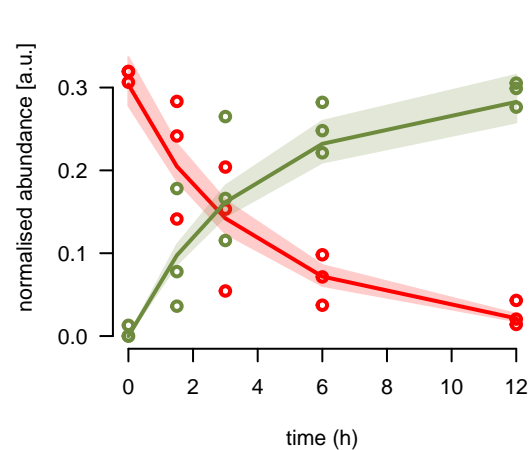**fraction: 4**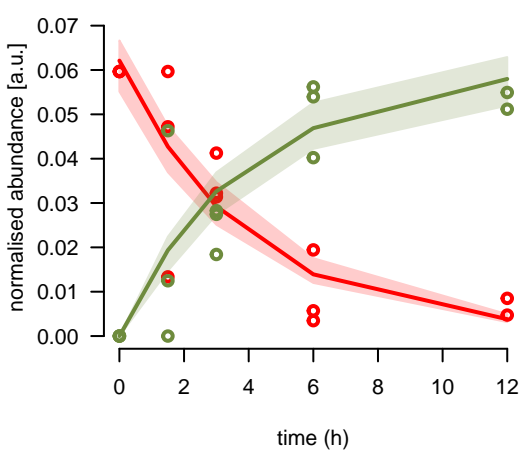**fraction: 5**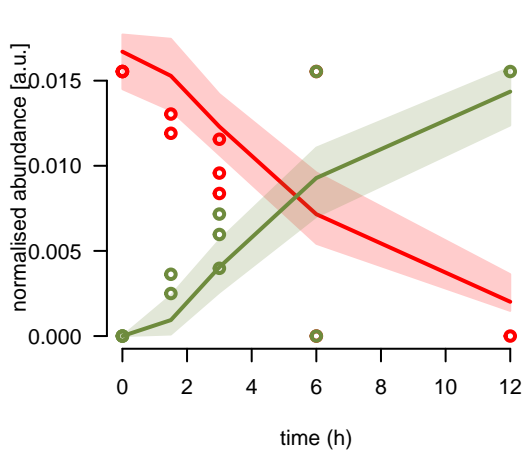**fraction: 6**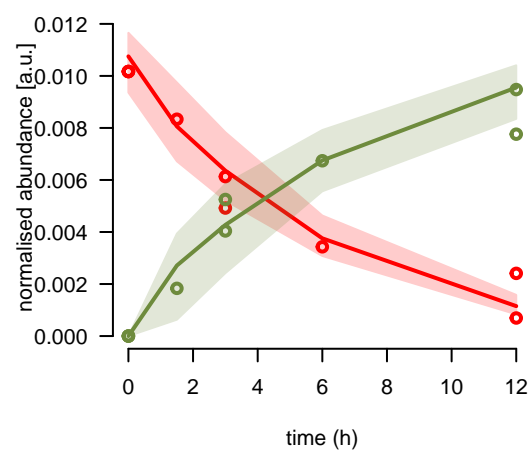**fraction: 7**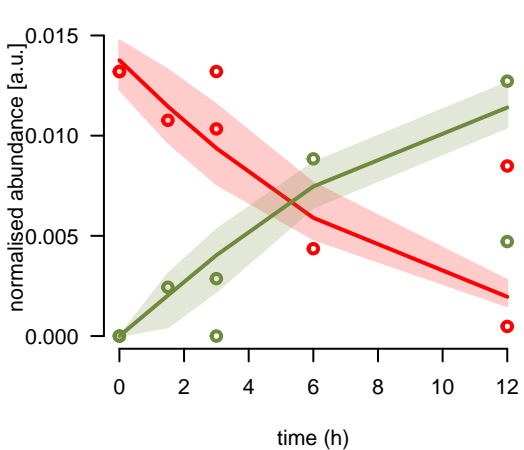**fraction: 8**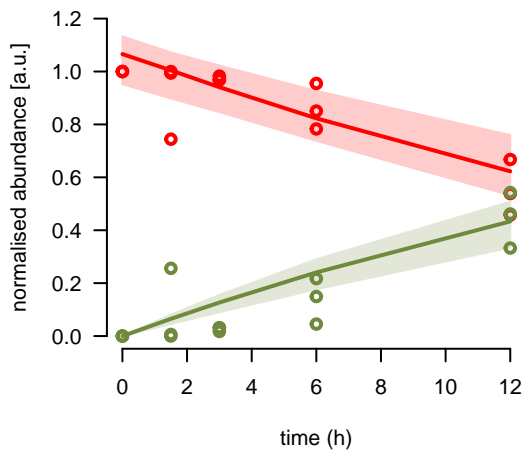**fraction: 9**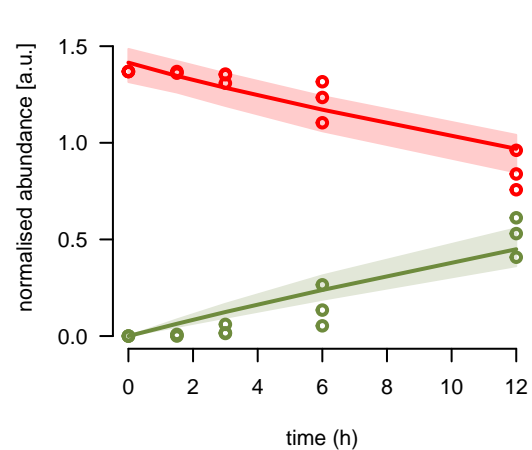**abundances**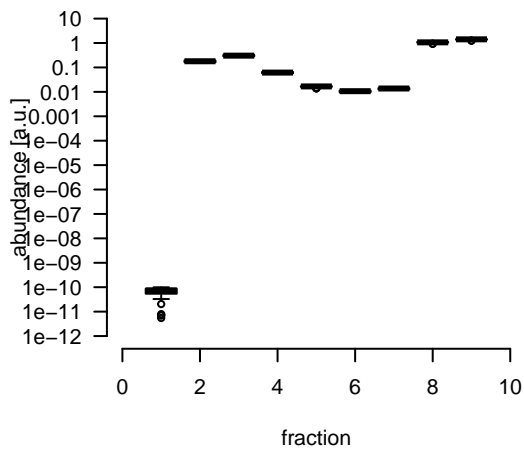**fluxes**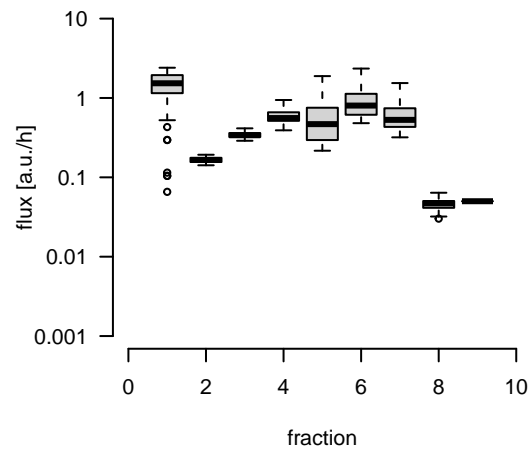



**bl21m fraction: 1**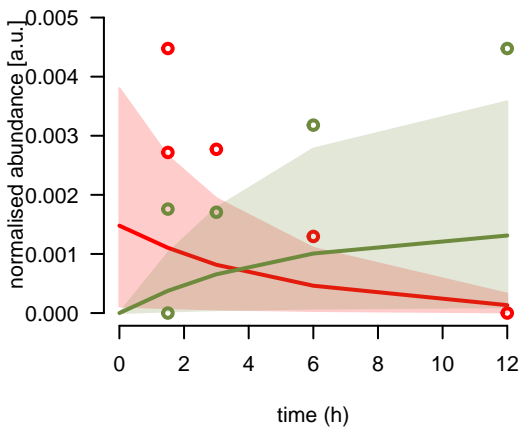**fraction: 2**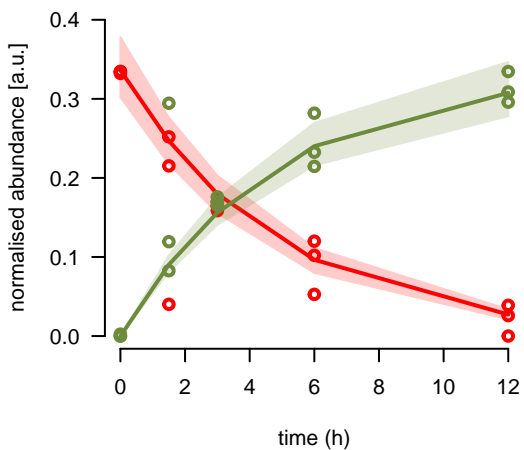**fraction: 3**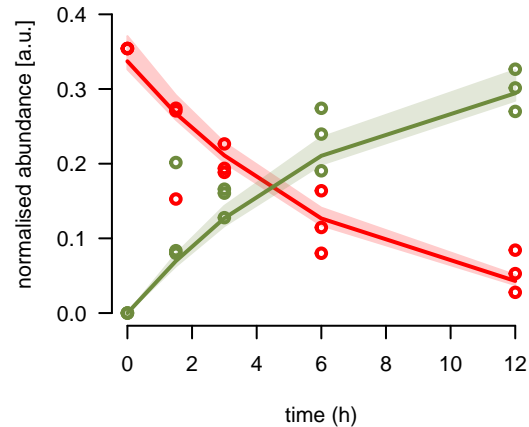**fraction: 4**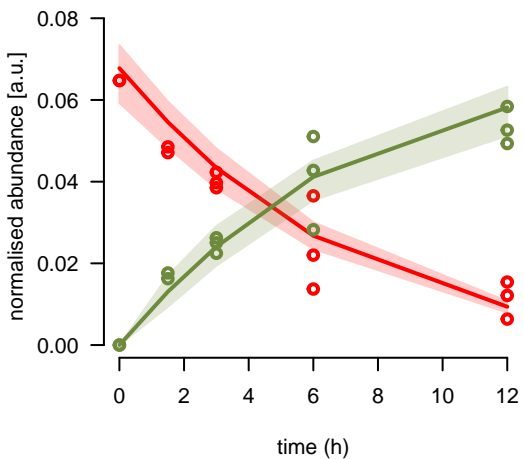**fraction: 5**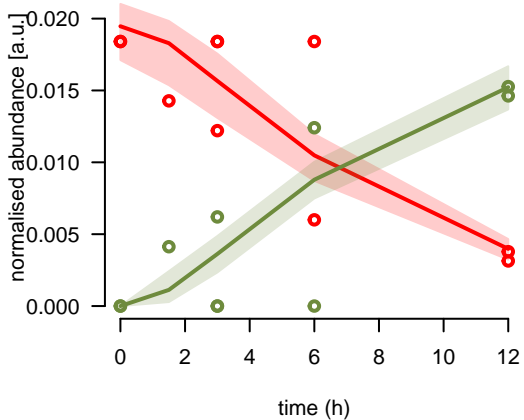**fraction: 6**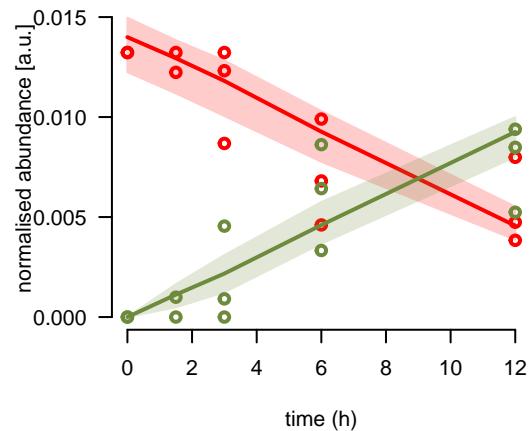**fraction: 7**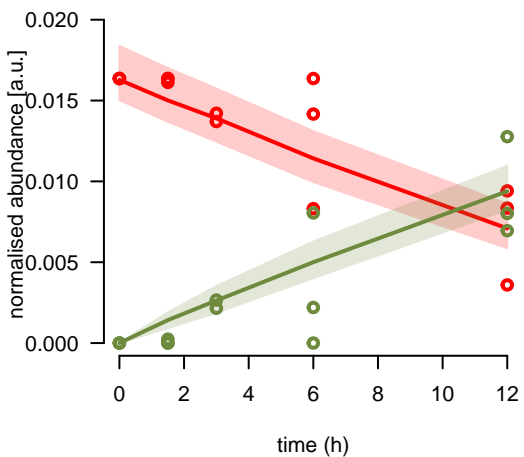**fraction: 8**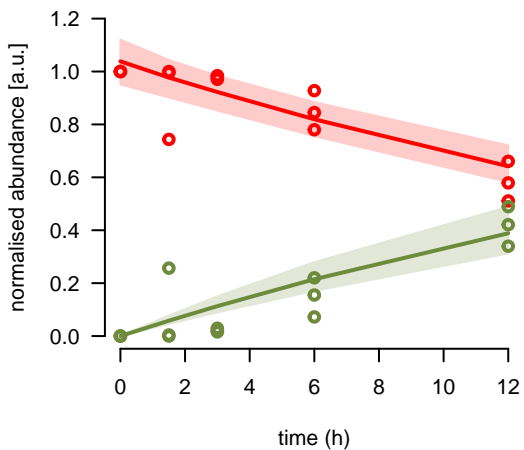**fraction: 9**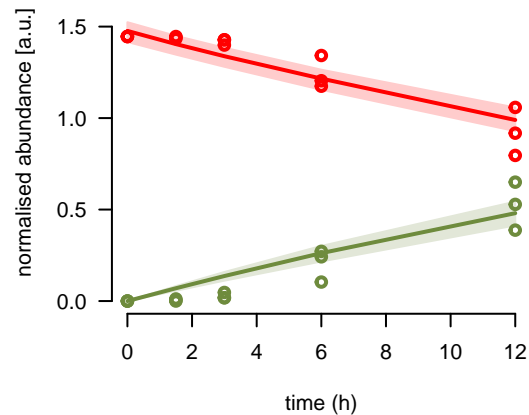**abundances**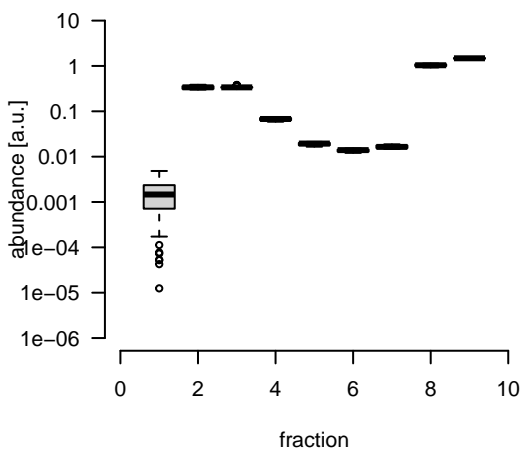**fluxes**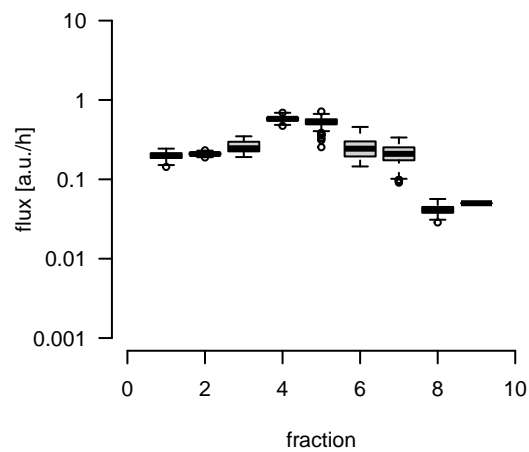

**uL22m fraction: 1**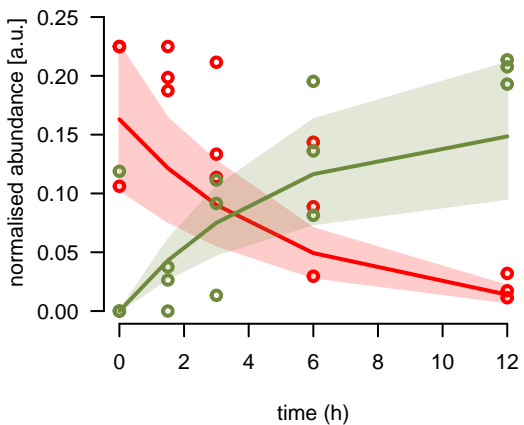**fraction: 2**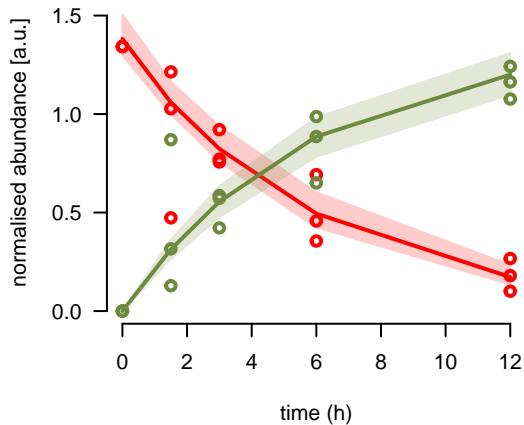**fraction: 3**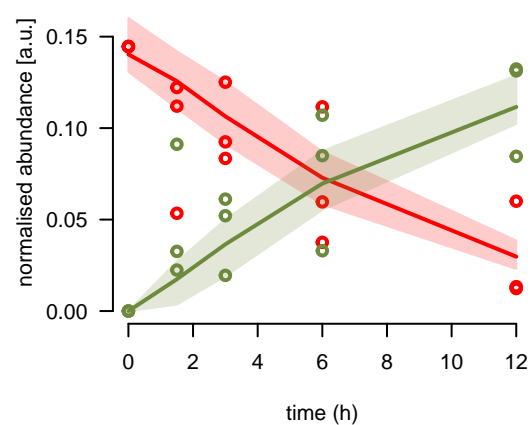**fraction: 4**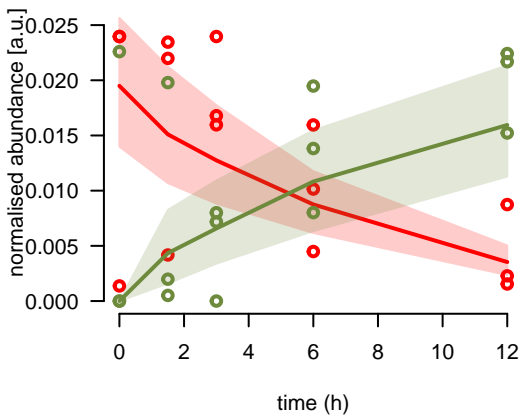**fraction: 5**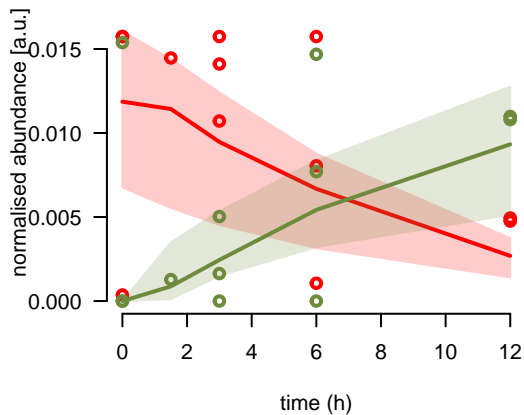**fraction: 6**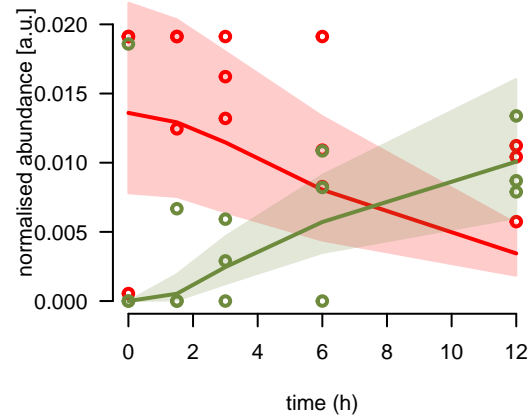**fraction: 7**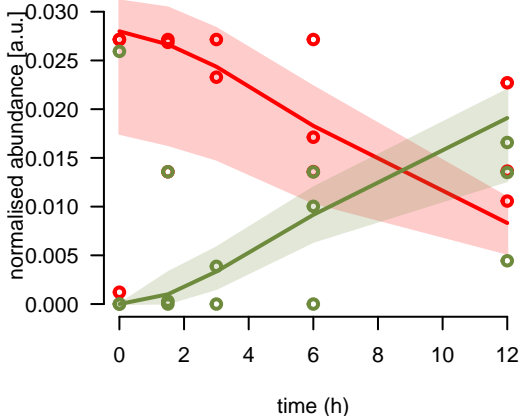**fraction: 8**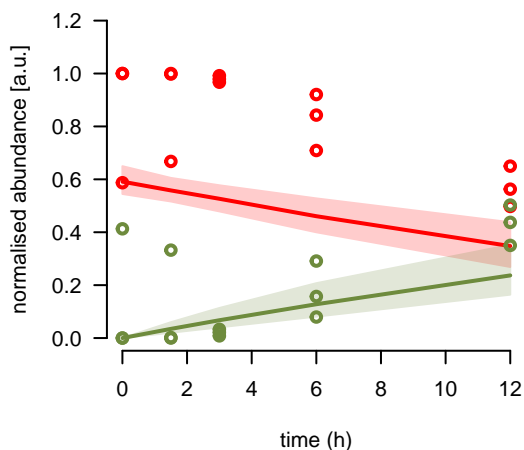**fraction: 9**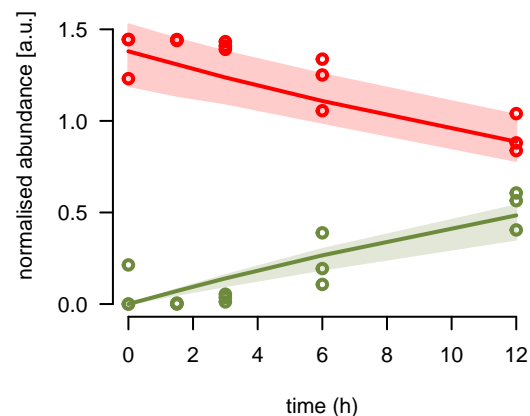**abundances**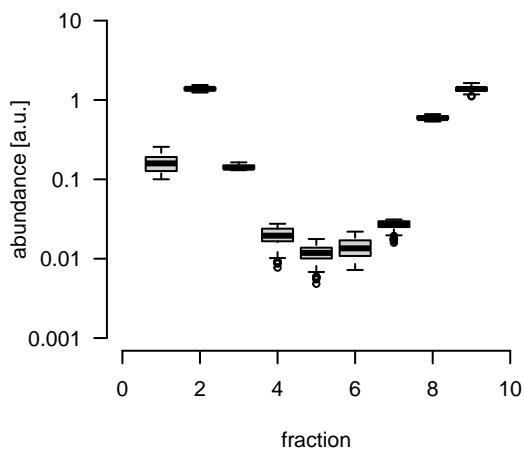**fluxes**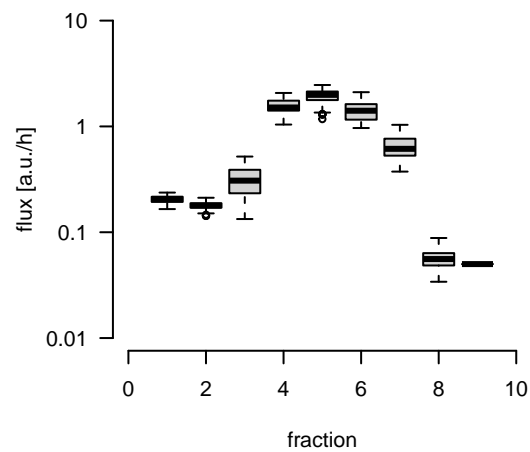

**uL23m fraction: 1****fraction: 2**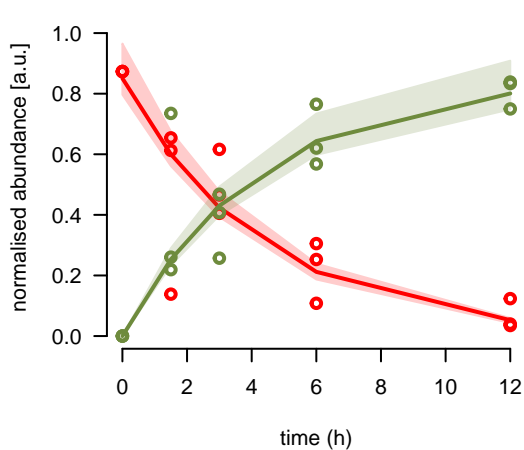**fraction: 3**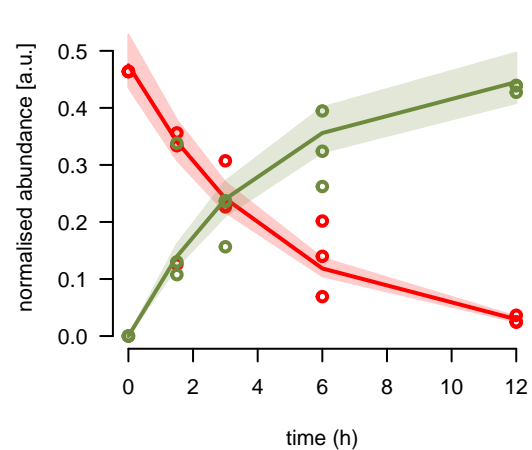**fraction: 4**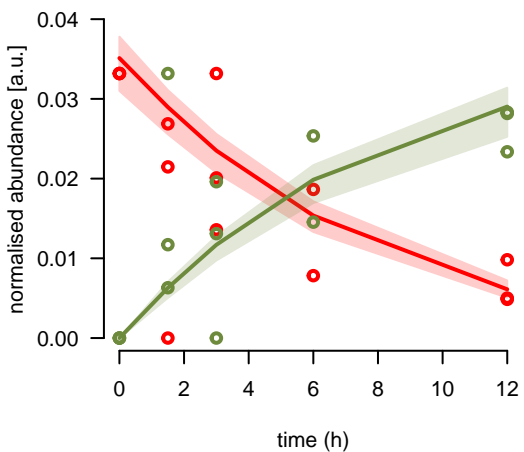**fraction: 5**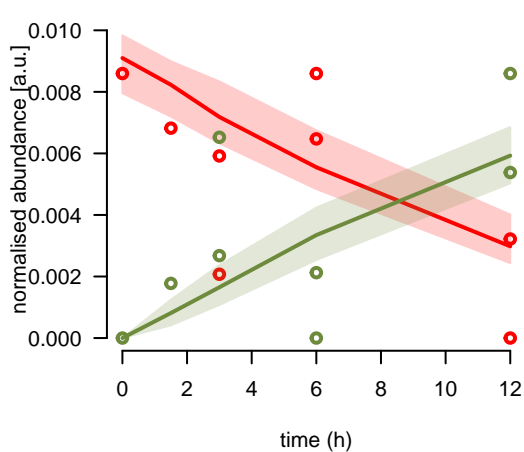**fraction: 6**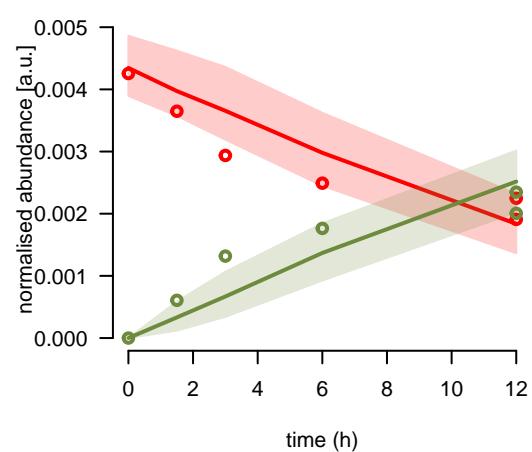**fraction: 7**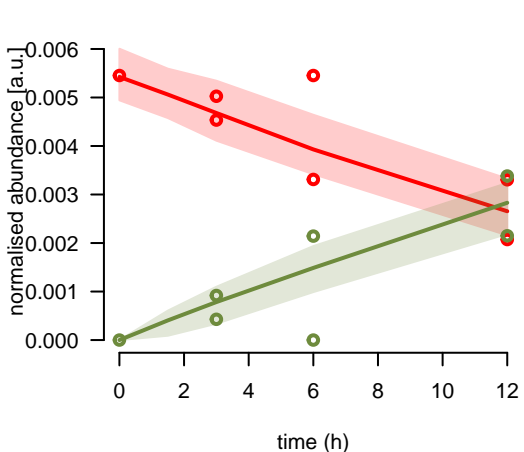**fraction: 8**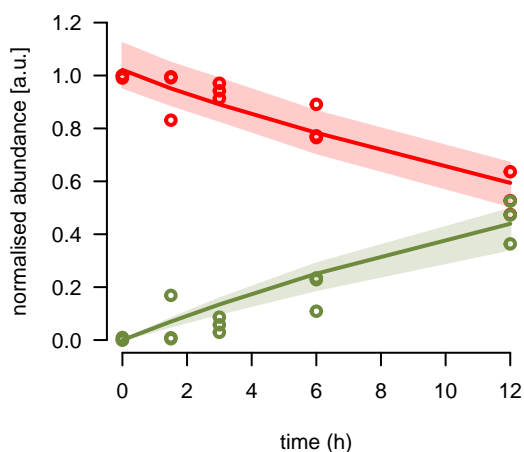**fraction: 9**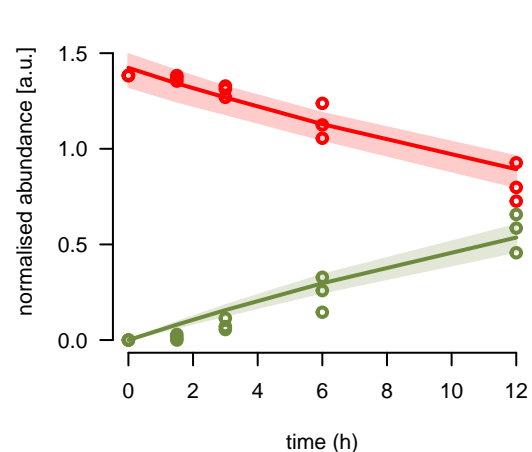**abundances**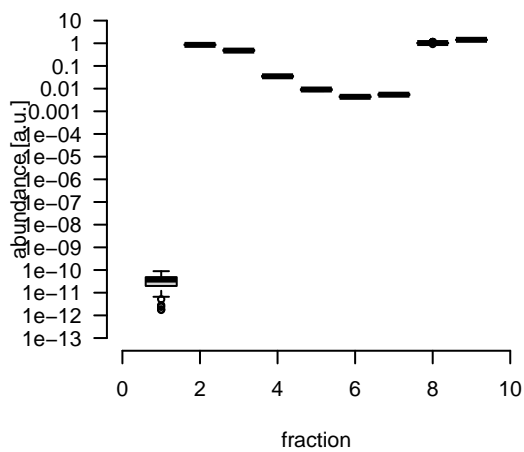**fluxes**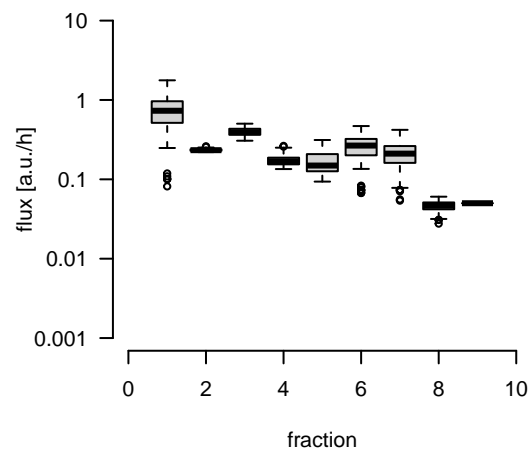

**uL24m fraction: 1**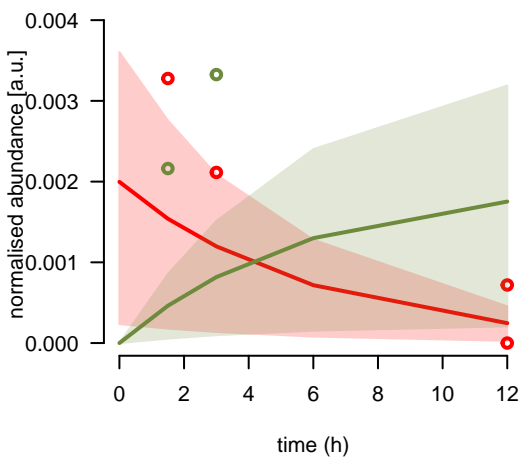**fraction: 2**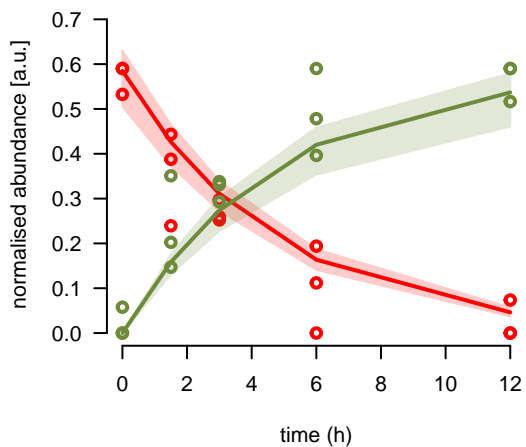**fraction: 3**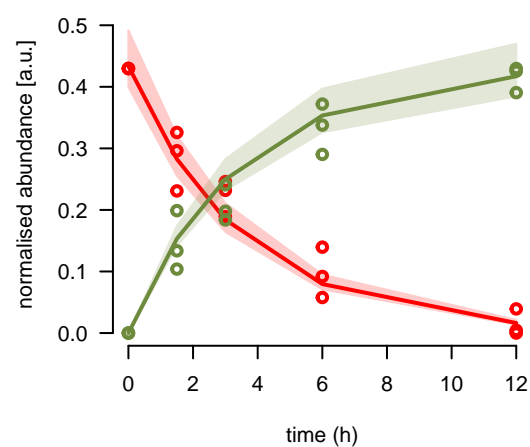**fraction: 4**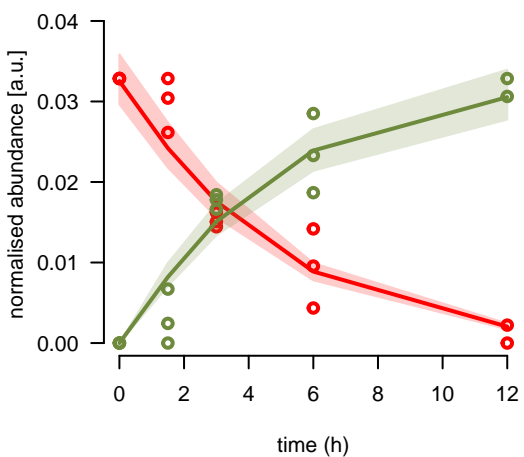**fraction: 5**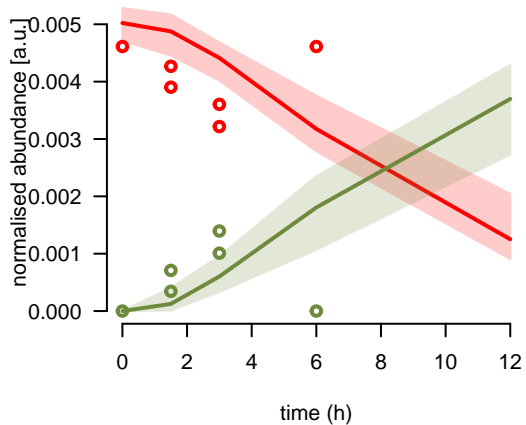**fraction: 6**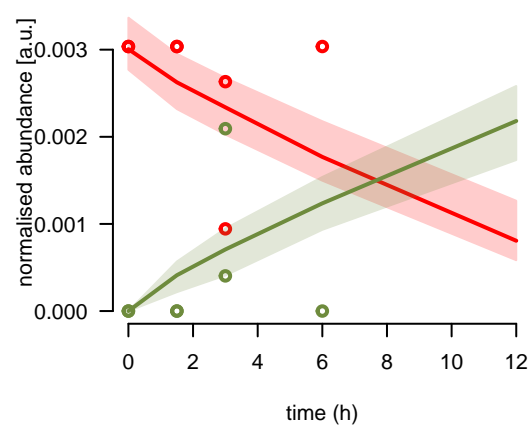**fraction: 7**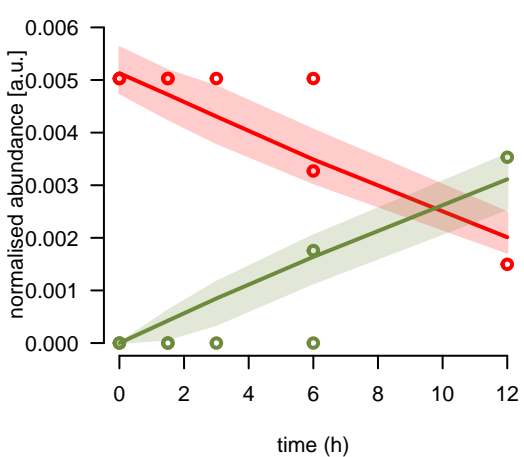**fraction: 8**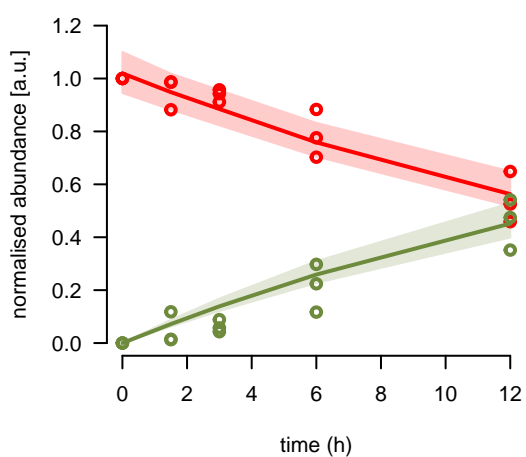**fraction: 9**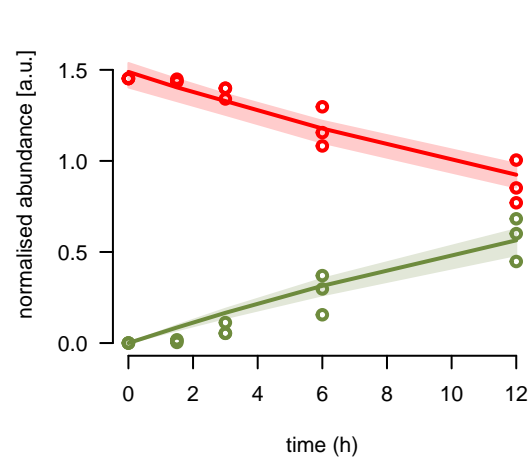**abundances**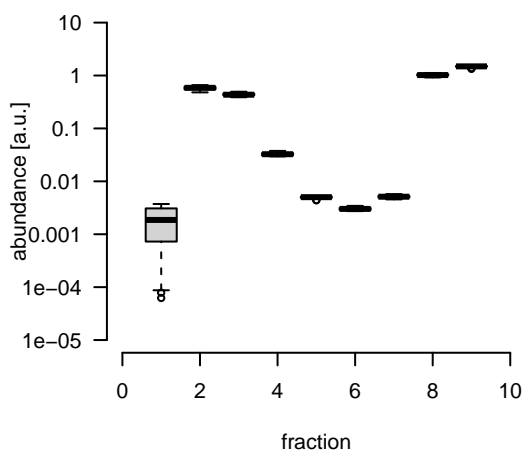**fluxes**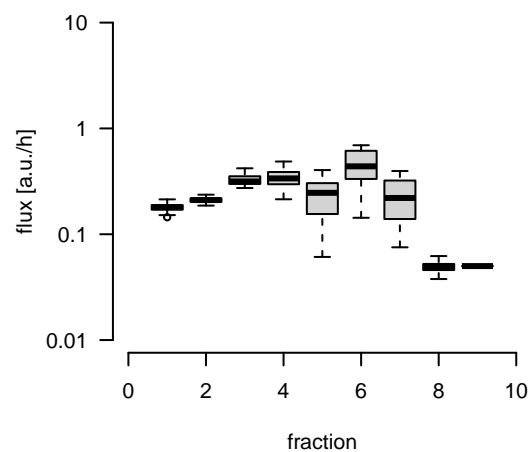

**bl27m fraction: 1****fraction: 2**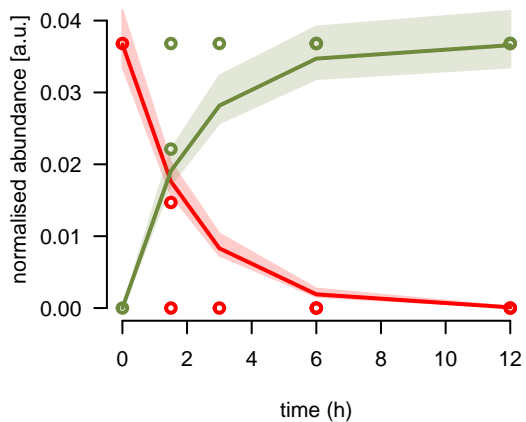**fraction: 3**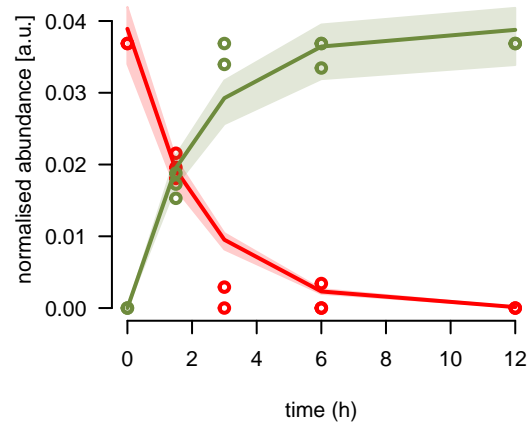**fraction: 4**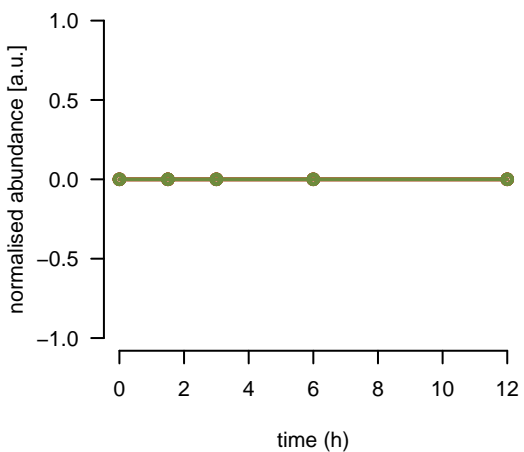**fraction: 5**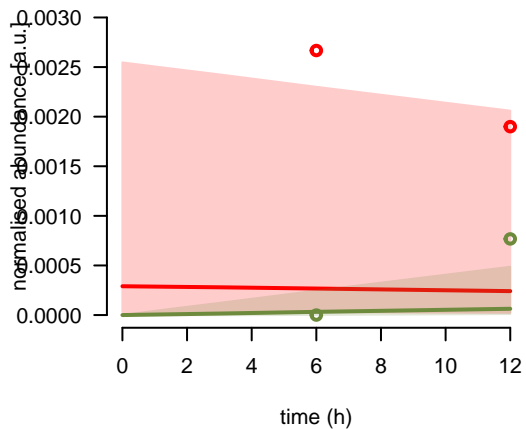**fraction: 6**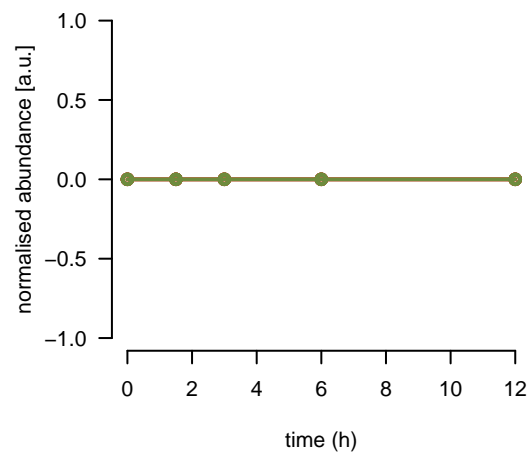**fraction: 7**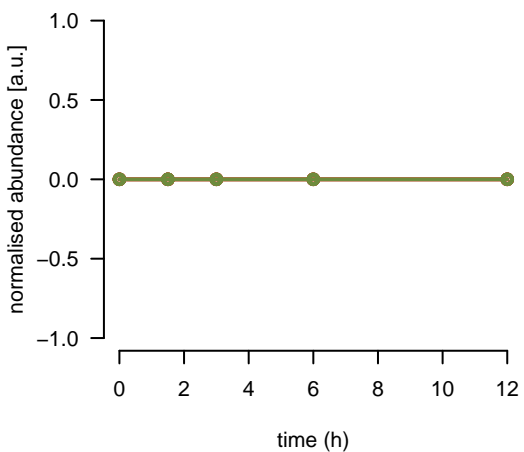**fraction: 8**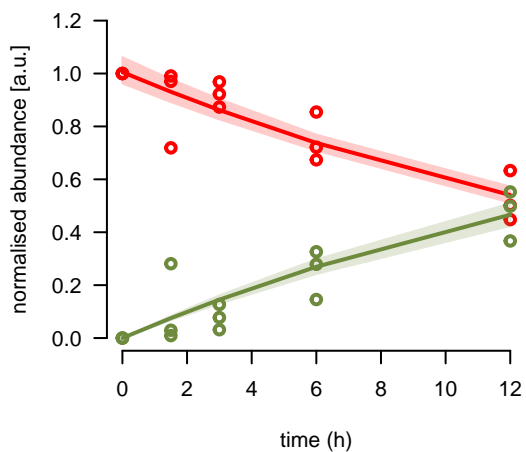**fraction: 9**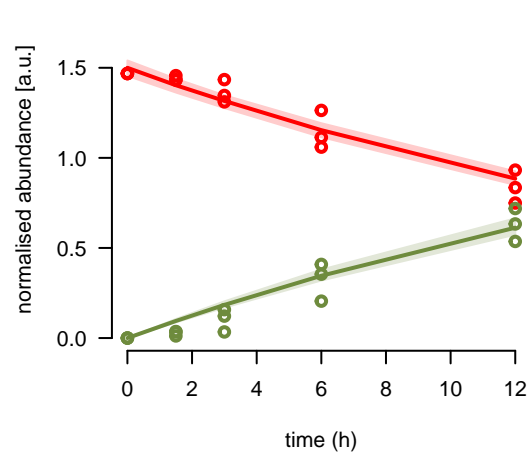**abundances**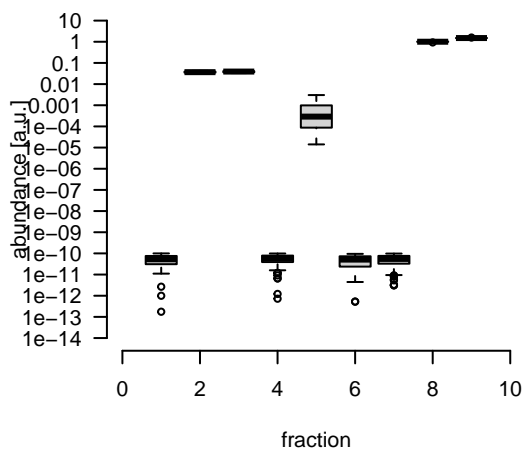**fluxes**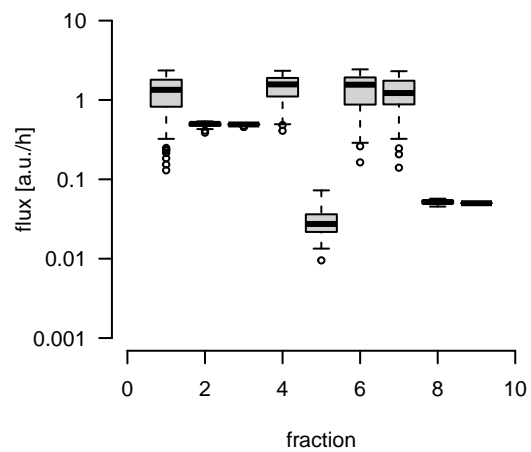

**bl28m fraction: 1****fraction: 2**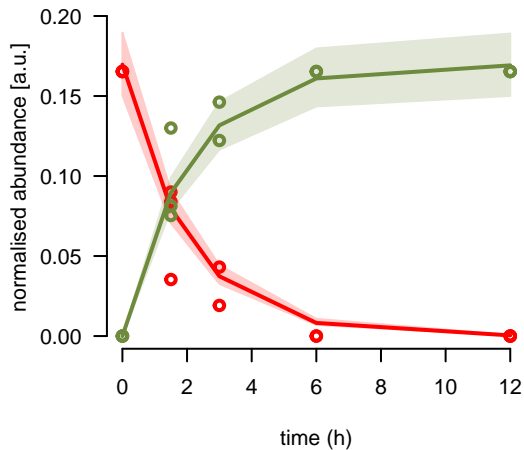**fraction: 3**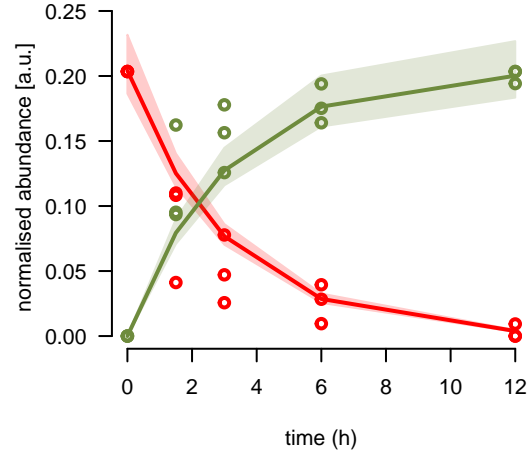**fraction: 4**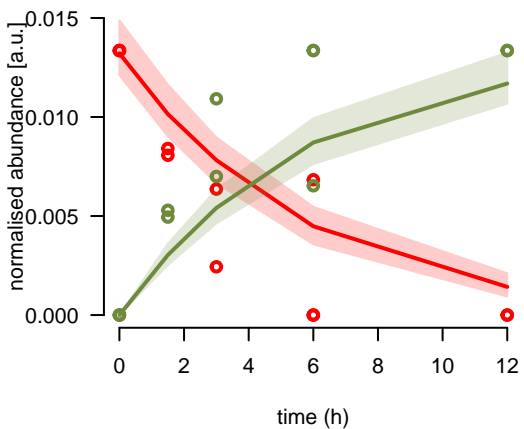**fraction: 5**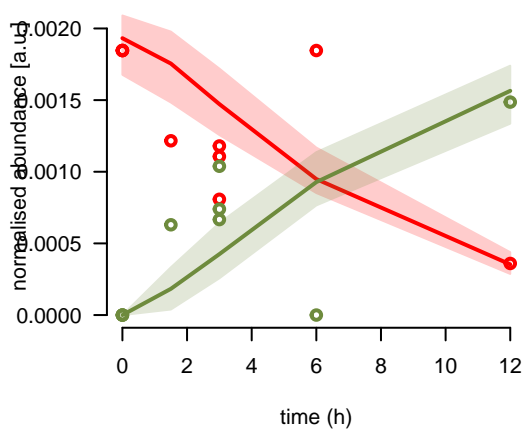**fraction: 6**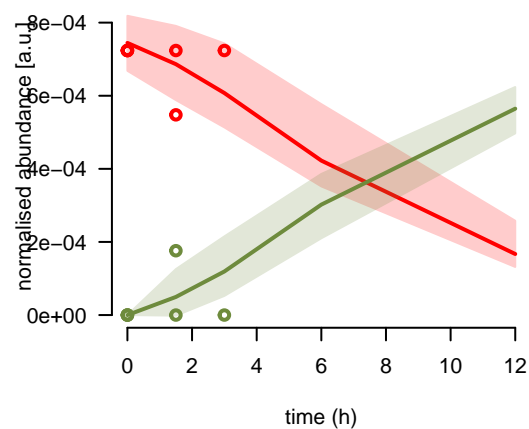**fraction: 7**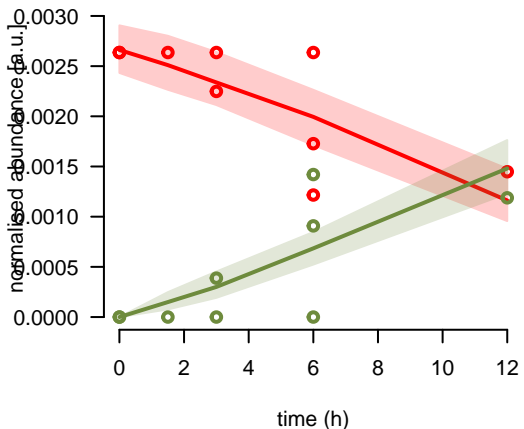**fraction: 8**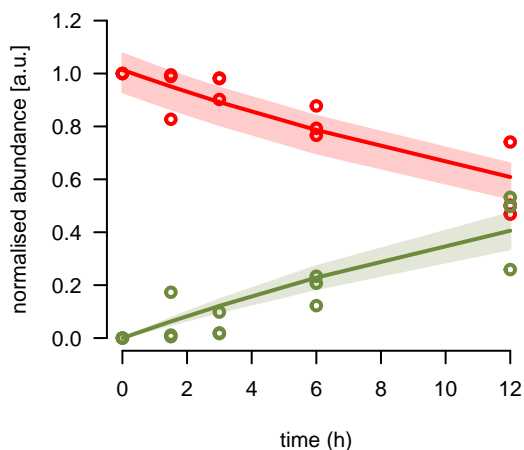**fraction: 9**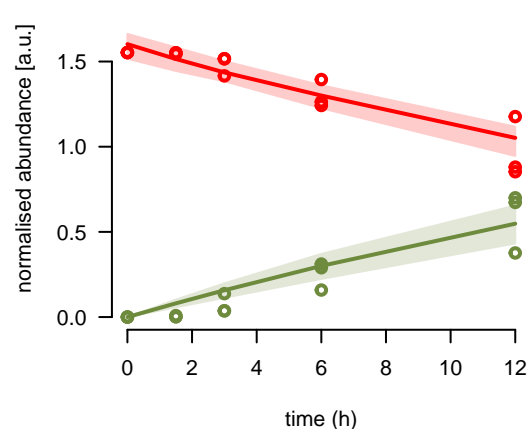**abundances**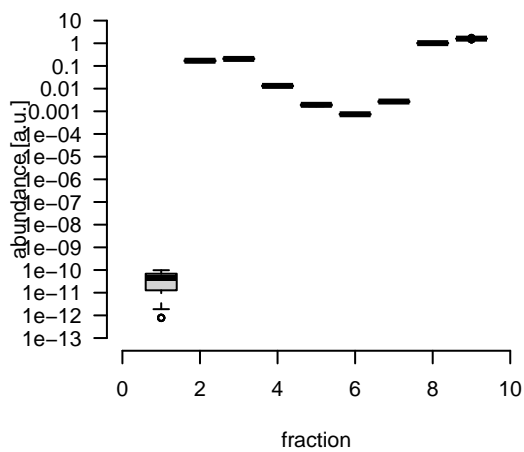**fluxes**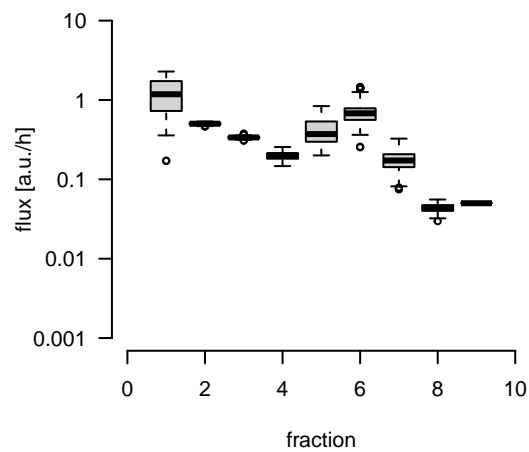

**uL29m fraction: 1****fraction: 2**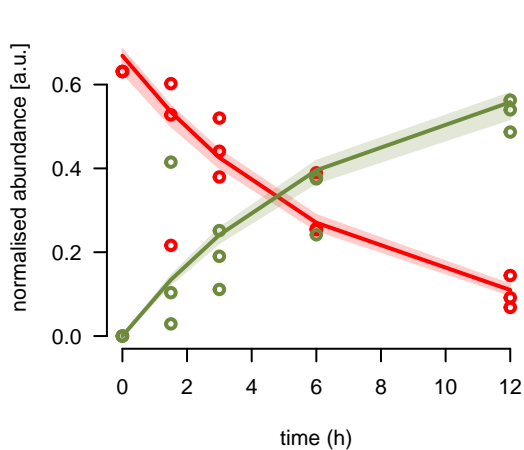**fraction: 3**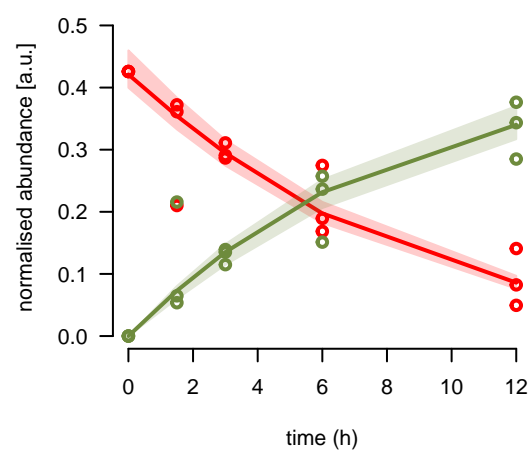**fraction: 4**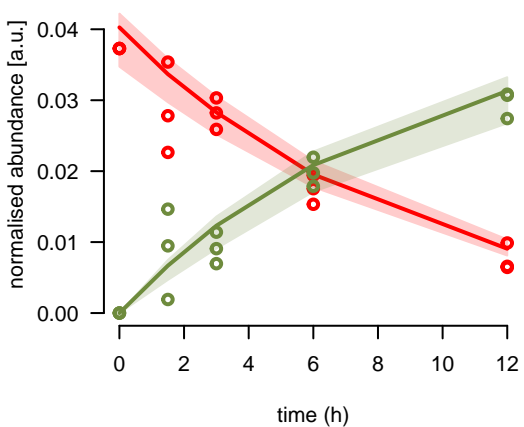**fraction: 5**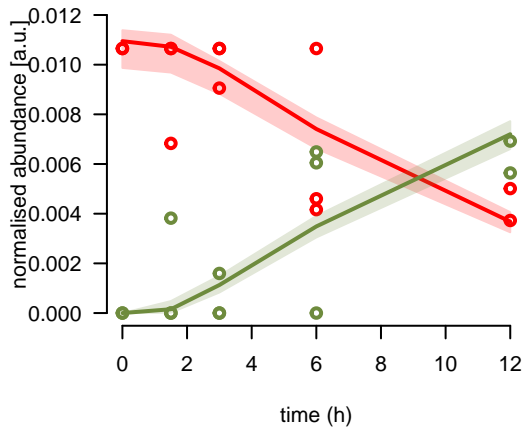**fraction: 6**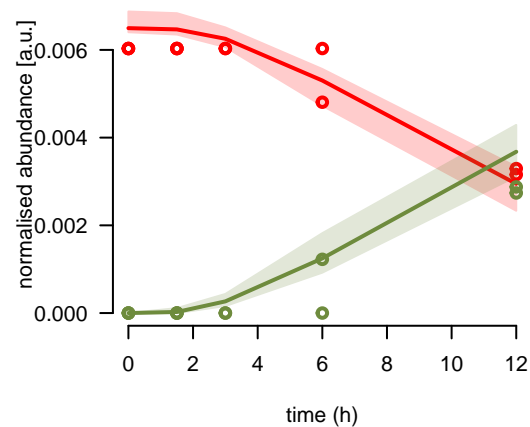**fraction: 7**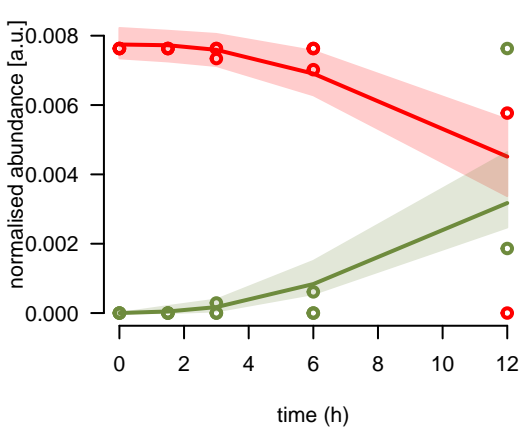**fraction: 8**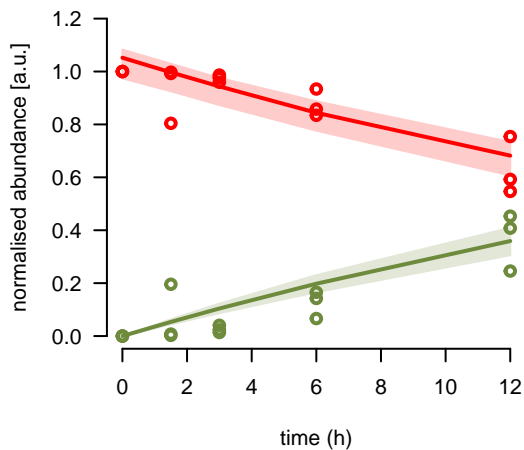**fraction: 9**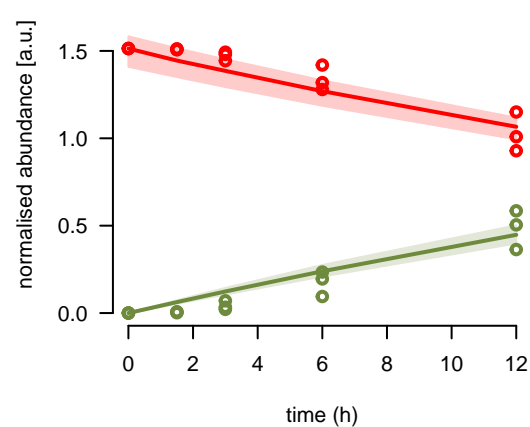**abundances**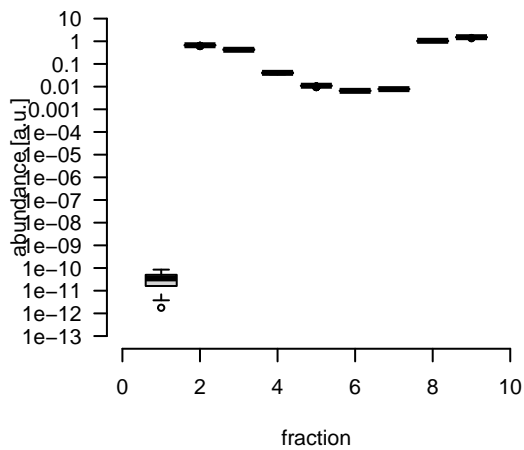**fluxes**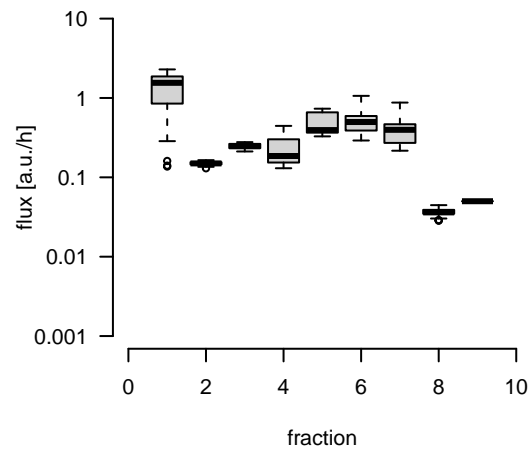

**uL30m fraction: 1**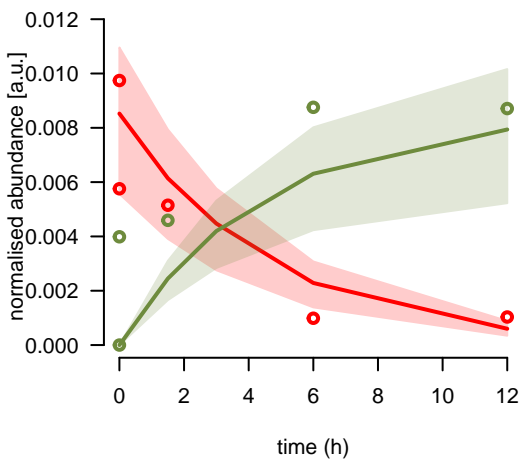**fraction: 2**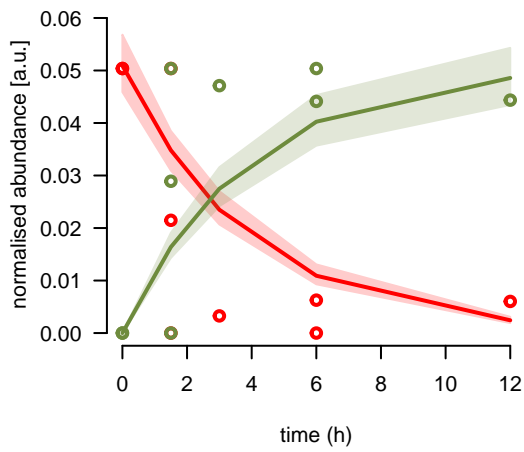**fraction: 3**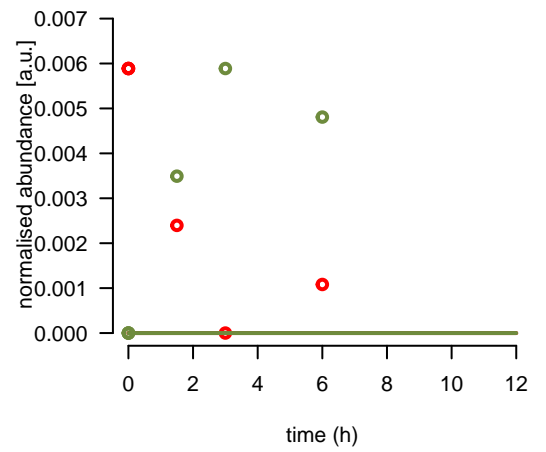**fraction: 4**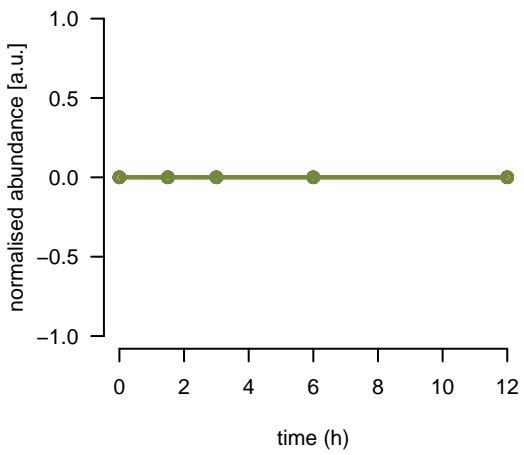**fraction: 5**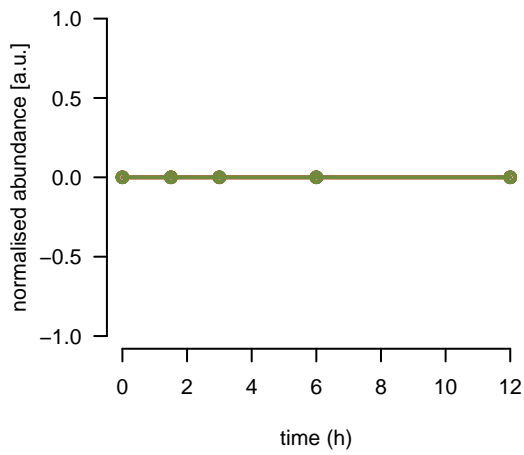**fraction: 6**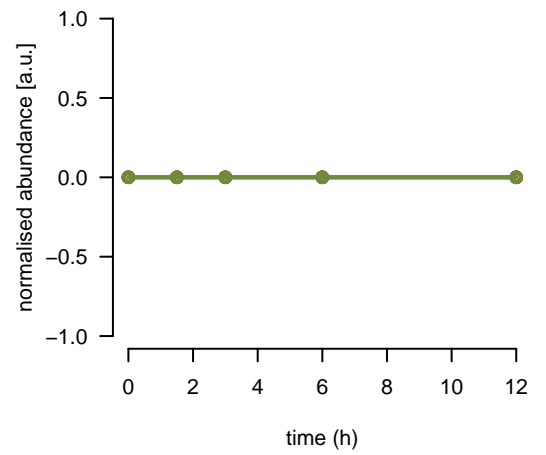**fraction: 7**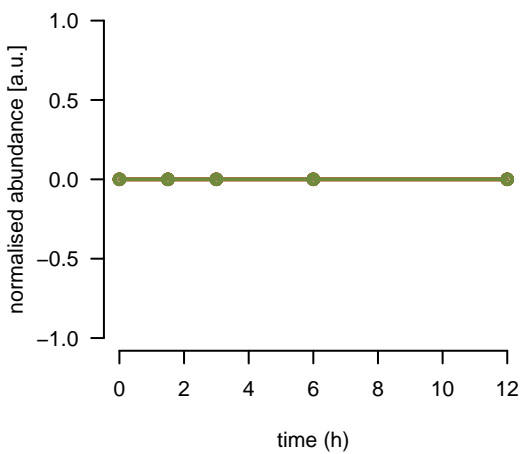**fraction: 8**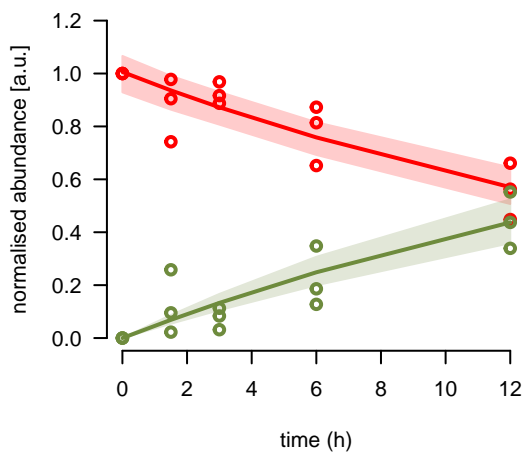**fraction: 9**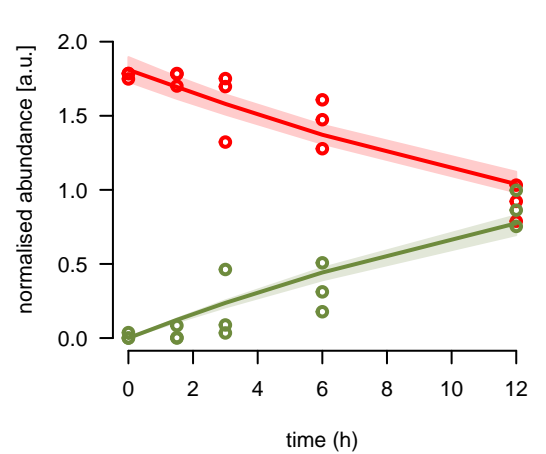**abundances**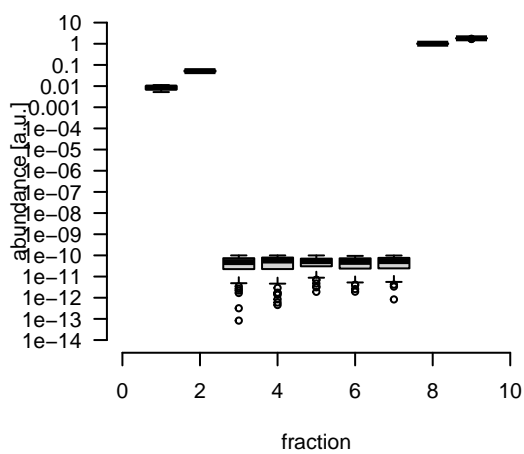**fluxes**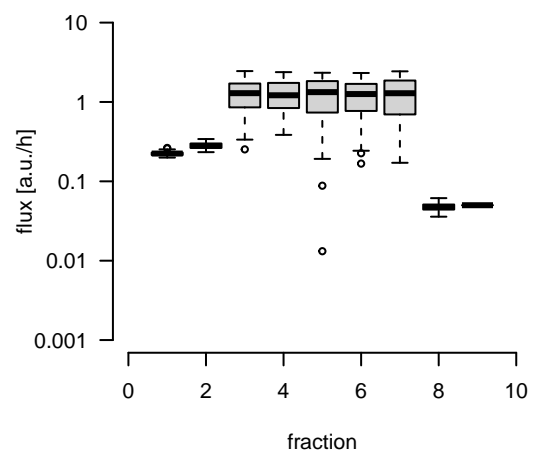



**bl31m fraction: 1**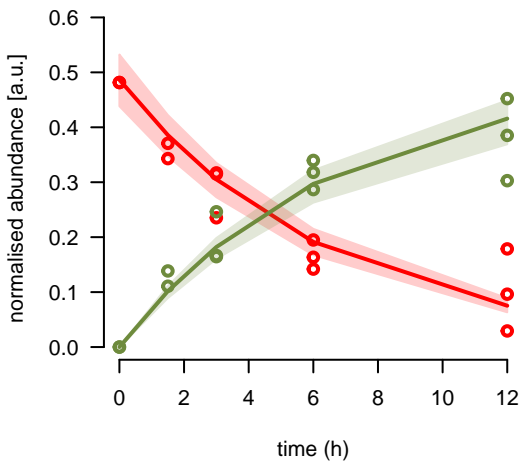**fraction: 2**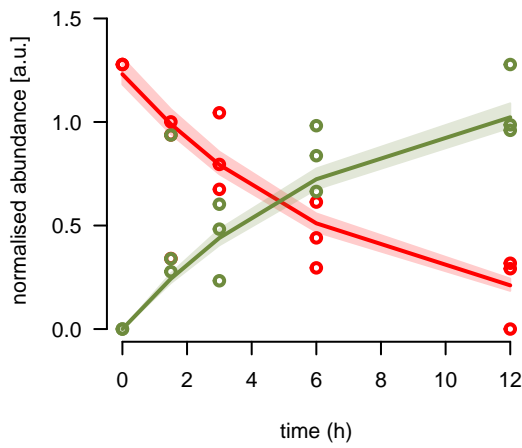**fraction: 3**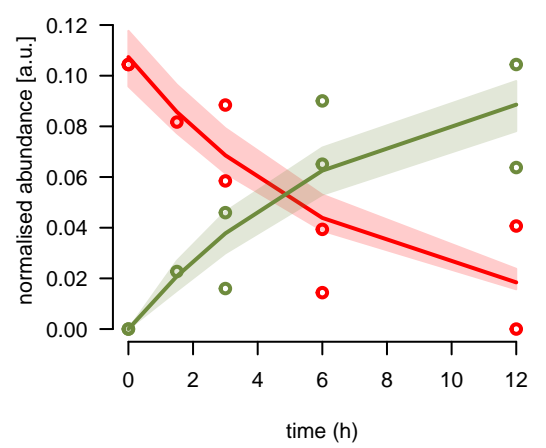**fraction: 4**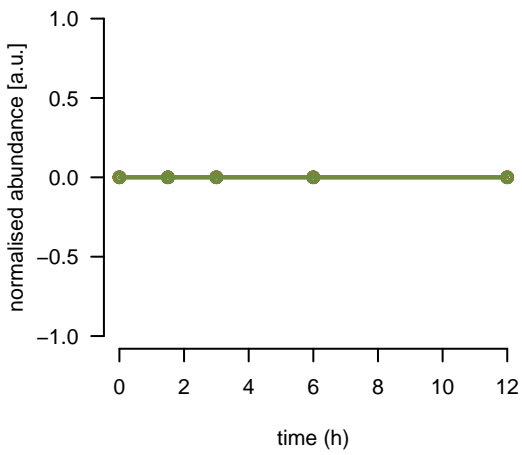**fraction: 5**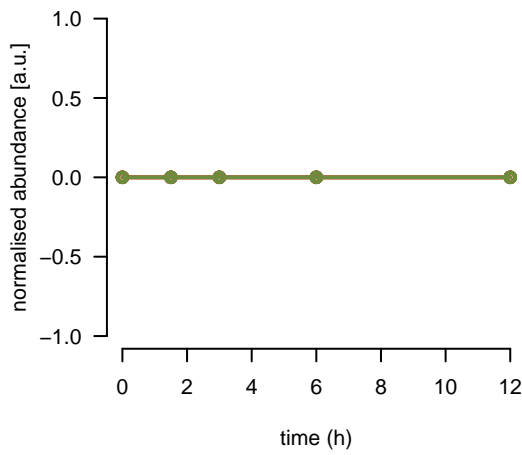**fraction: 6****fraction: 7**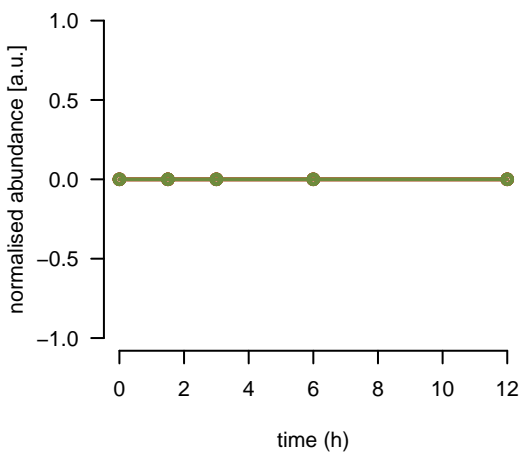**fraction: 8**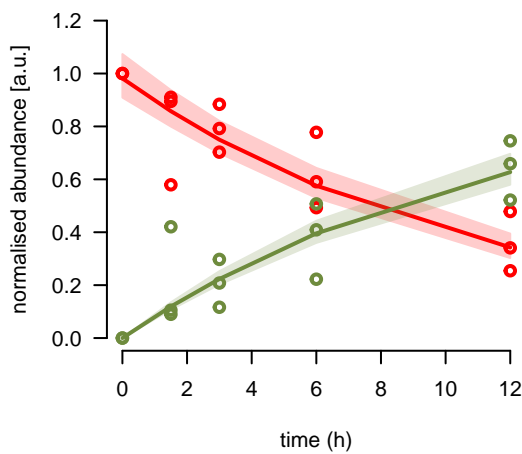**fraction: 9**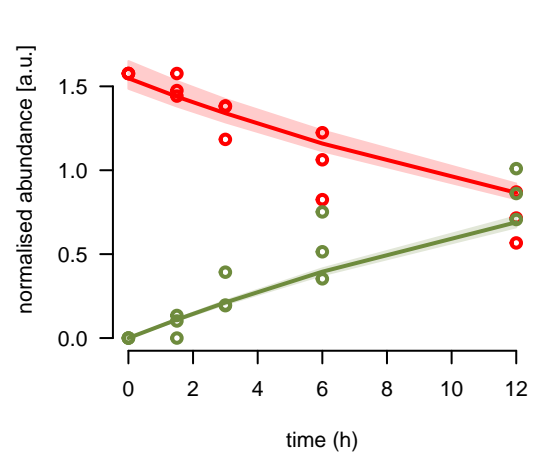**abundances**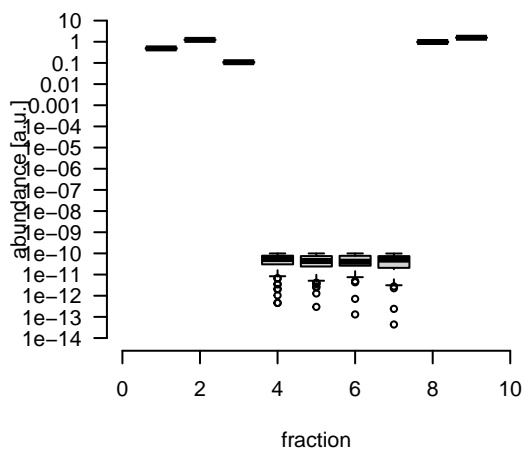**fluxes**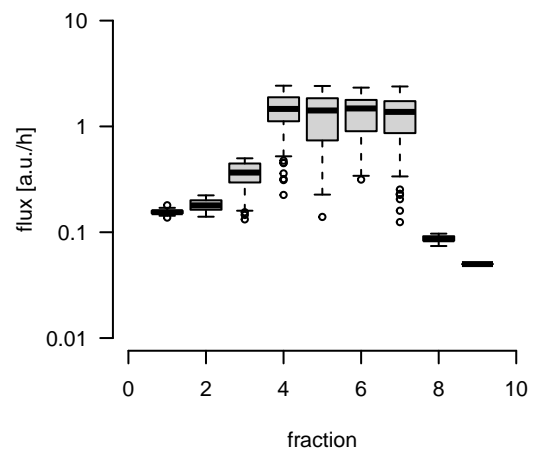

**bl32m fraction: 1**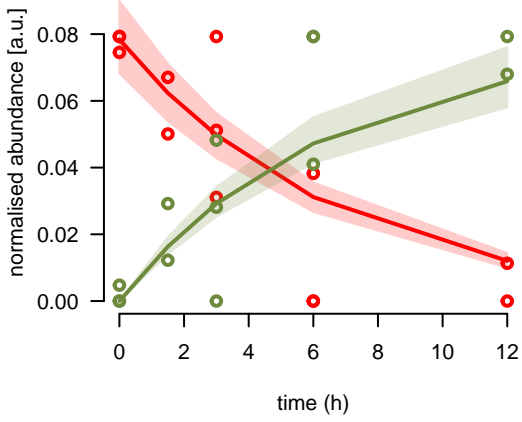**fraction: 2**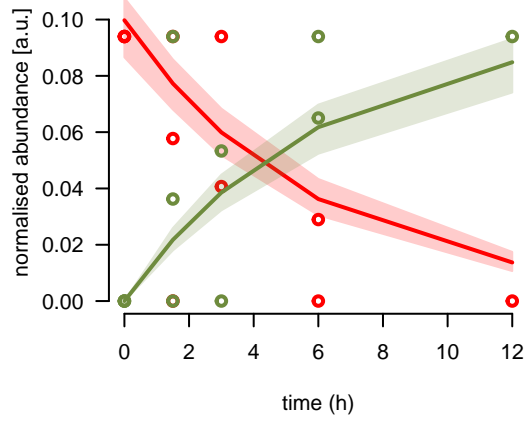**fraction: 3**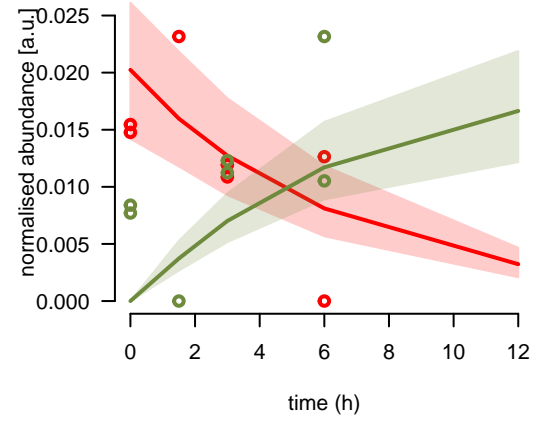**fraction: 4**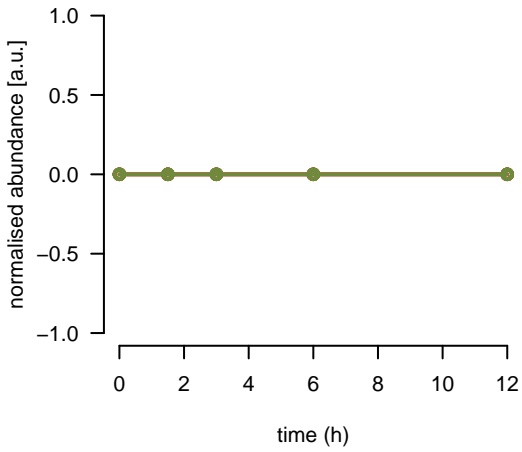**fraction: 5**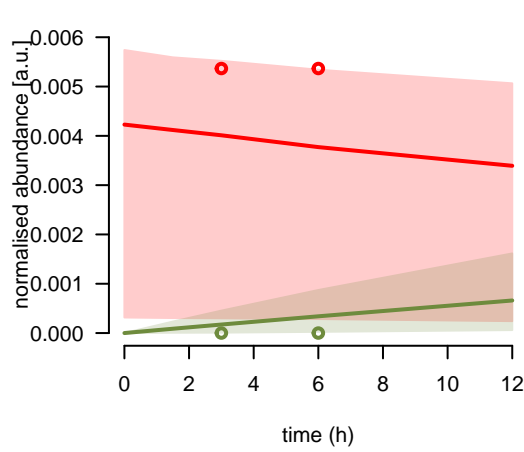**fraction: 6**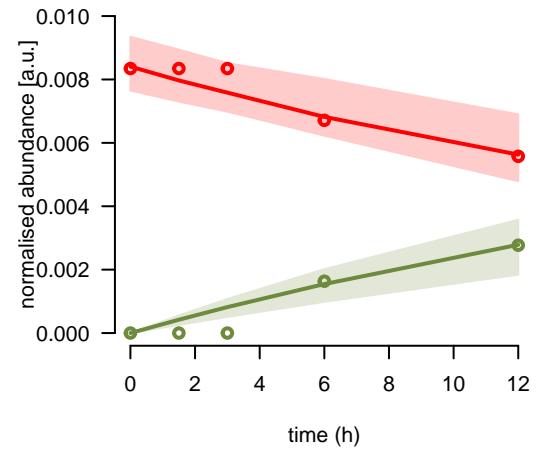**fraction: 7**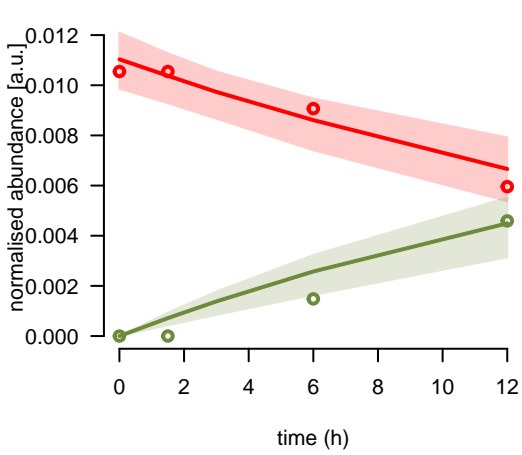**fraction: 8**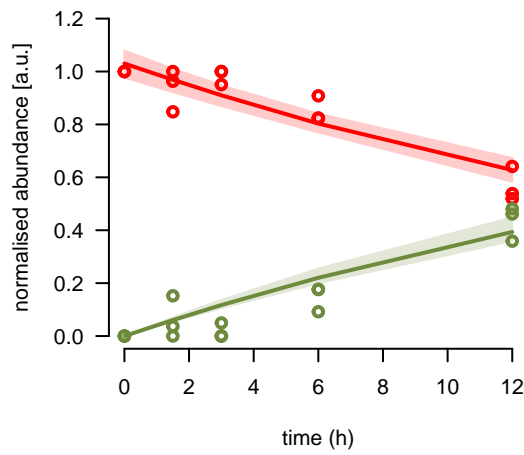**fraction: 9**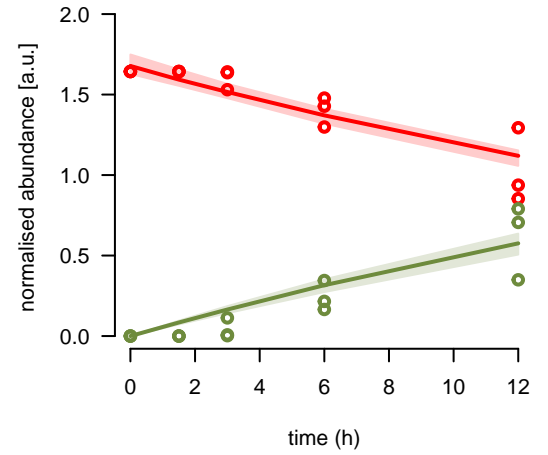**abundances**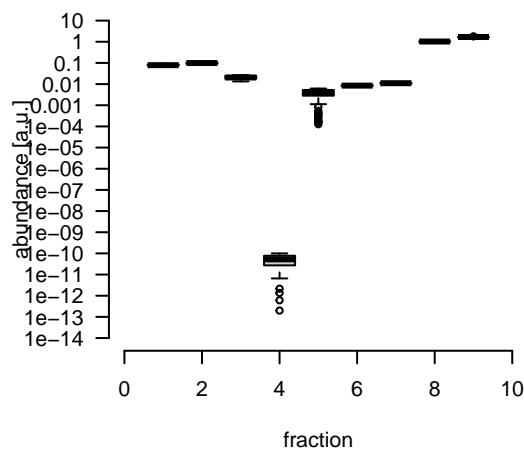**fluxes**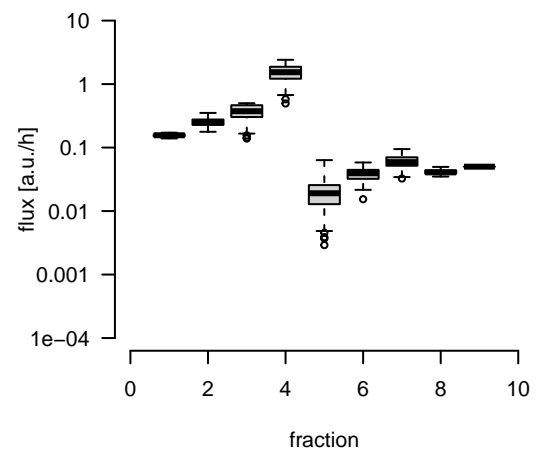

**bL33m fraction: 1**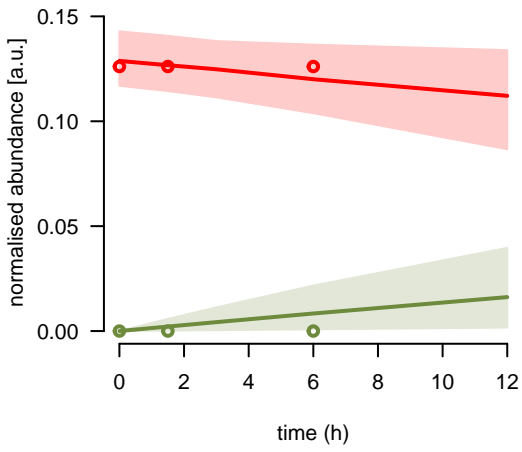**fraction: 2**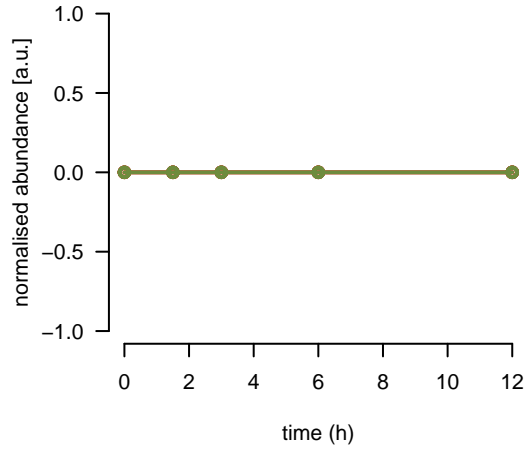**fraction: 3**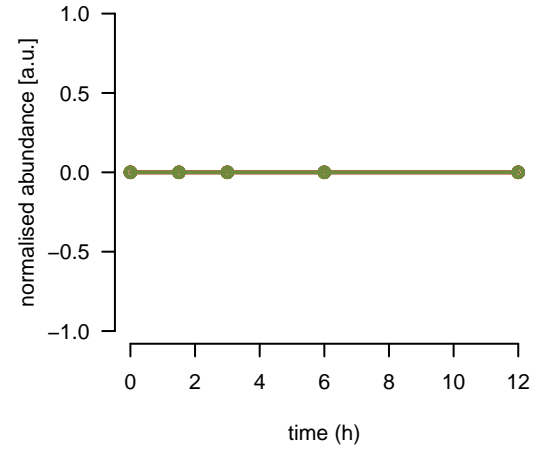**fraction: 4**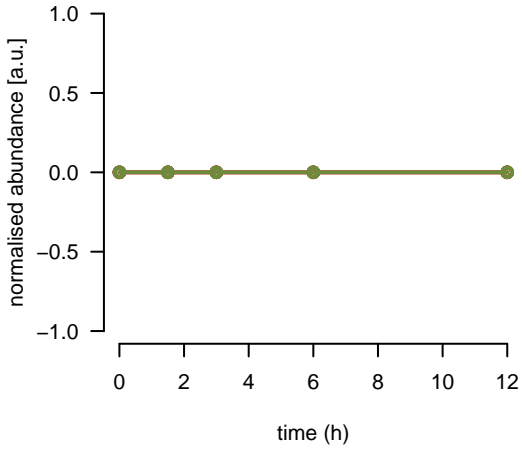**fraction: 5****fraction: 6****fraction: 7**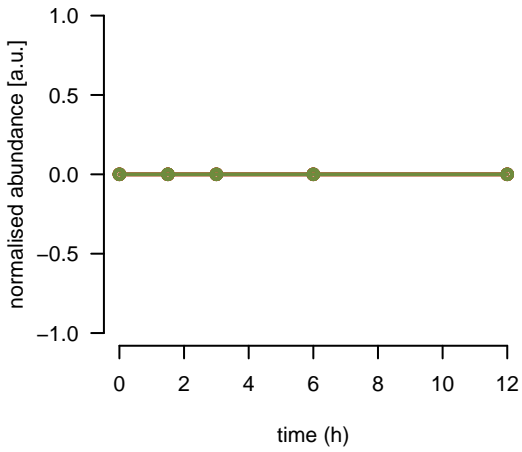**fraction: 8**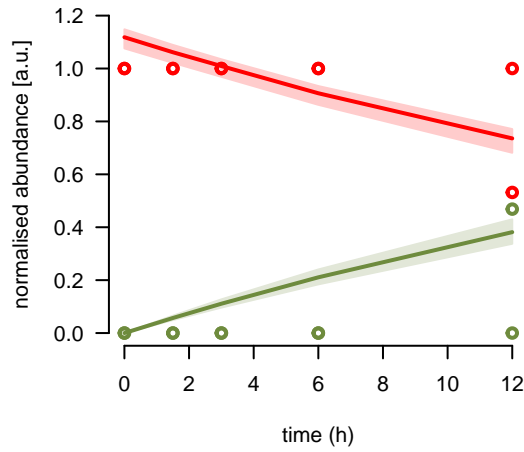**fraction: 9**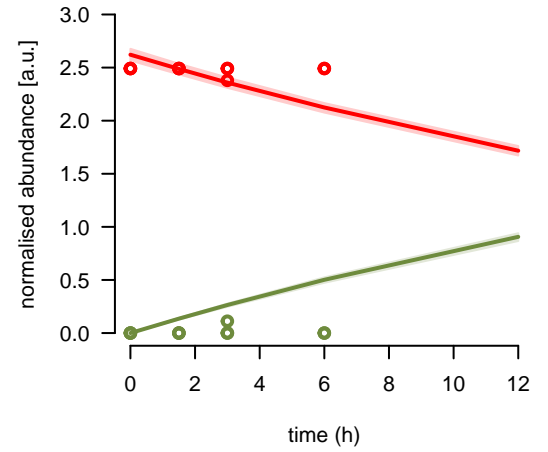**abundances**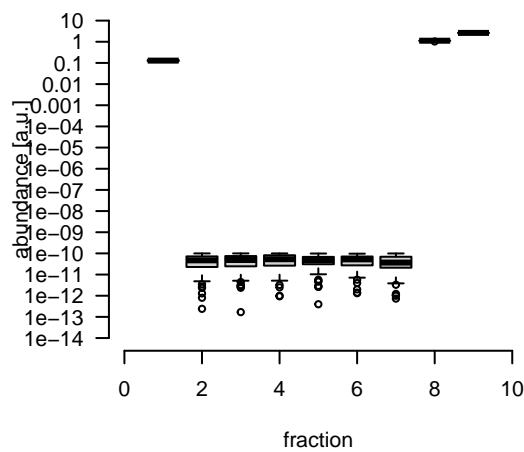**fluxes**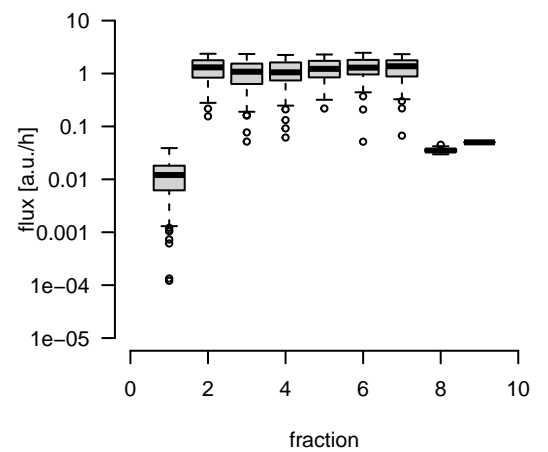

**bL34m fraction: 1**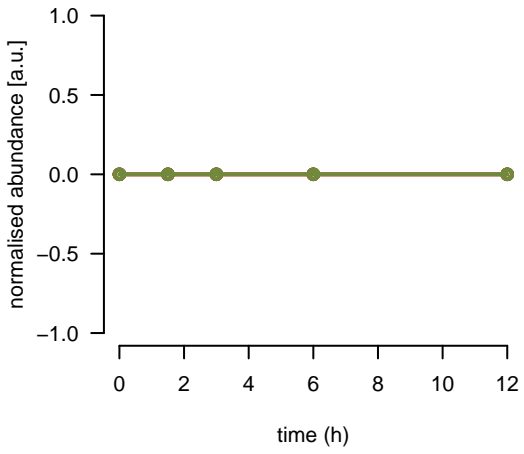**fraction: 2****fraction: 3****fraction: 4**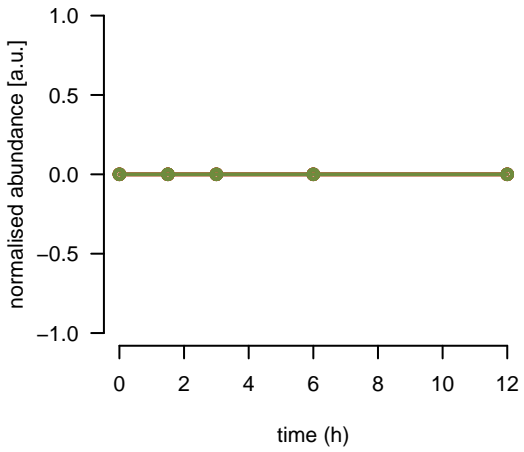**fraction: 5**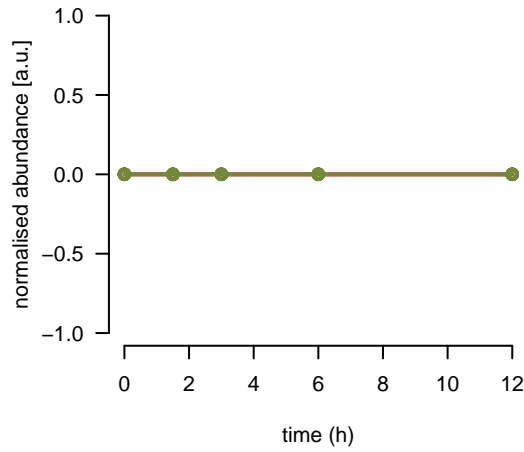**fraction: 6****fraction: 7**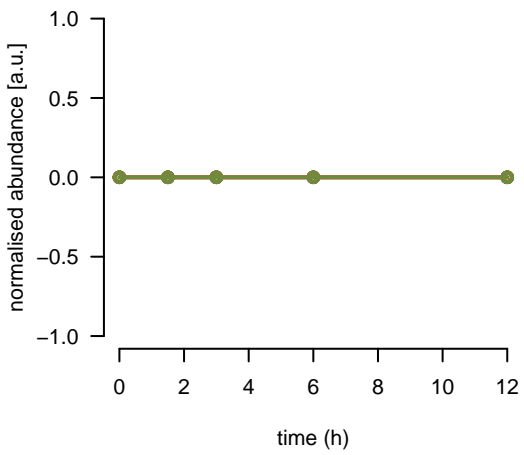**fraction: 8**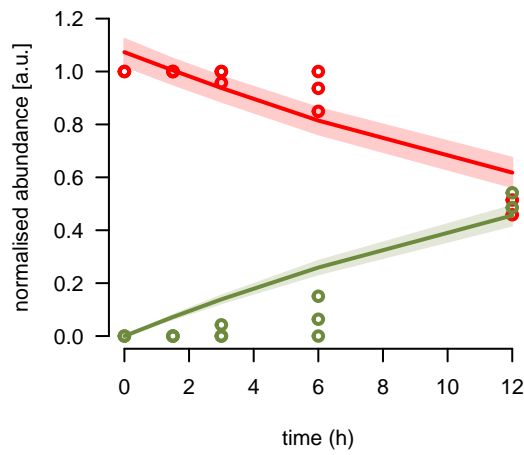**fraction: 9**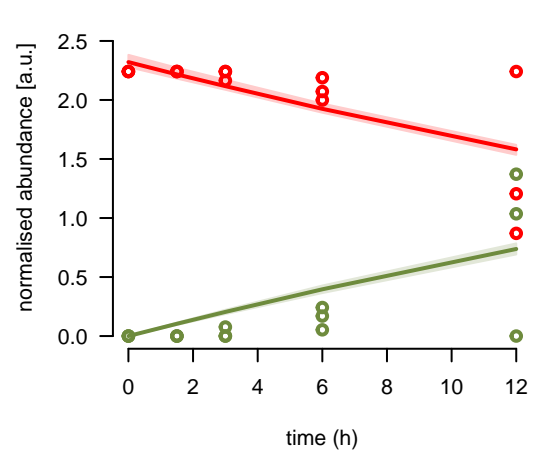**abundances**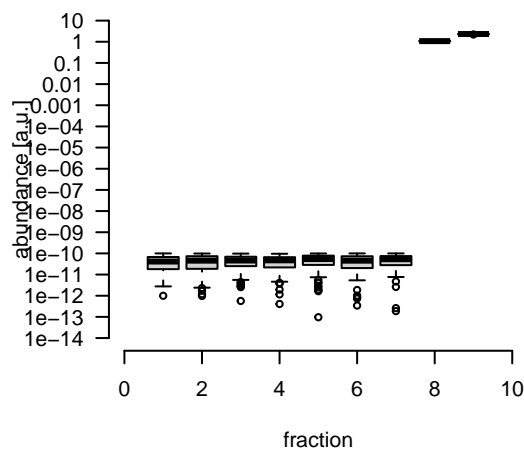**fluxes**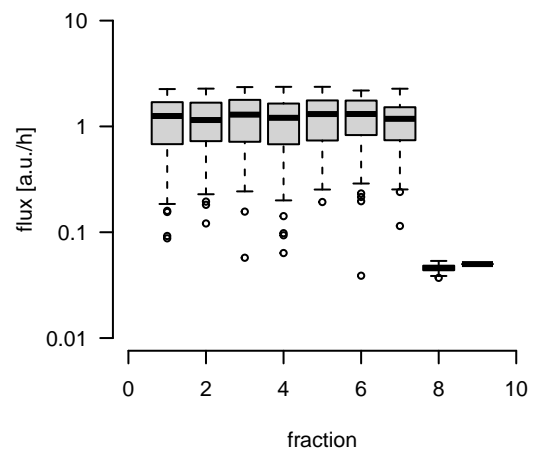

**bL35m fraction: 1****fraction: 2****fraction: 3****fraction: 4****fraction: 5****fraction: 6****fraction: 7****fraction: 8**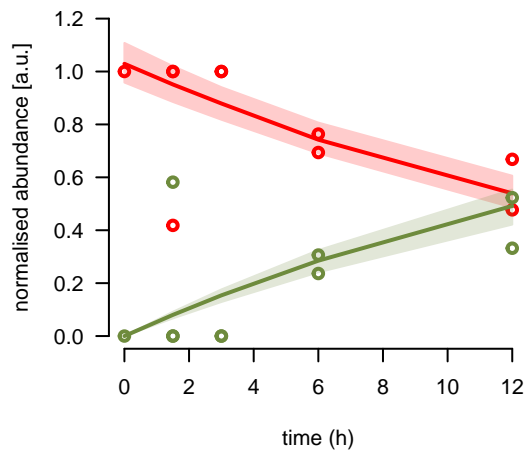**fraction: 9**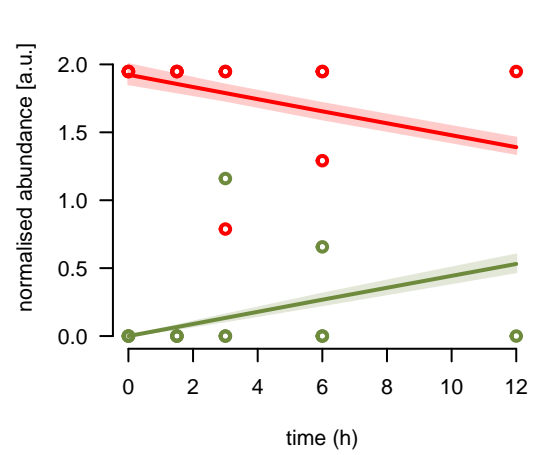**abundances**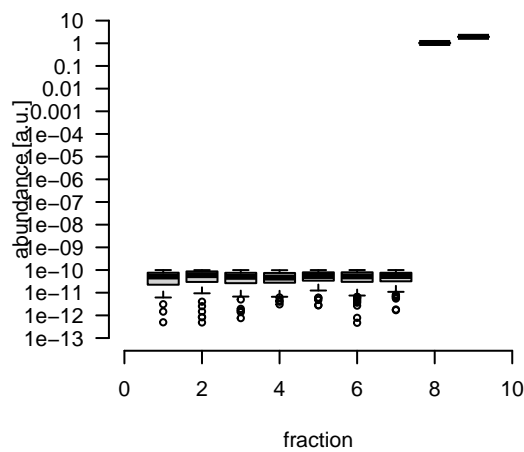**fluxes**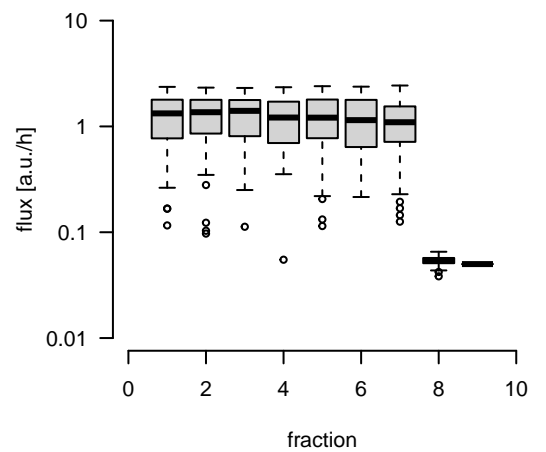

**bL36m fraction: 1****fraction: 2**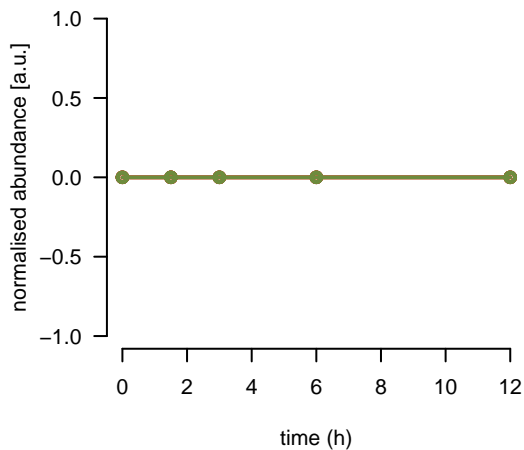**fraction: 3****fraction: 4****fraction: 5**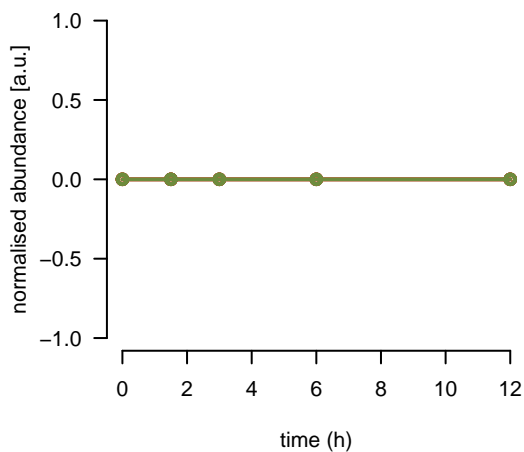**fraction: 6**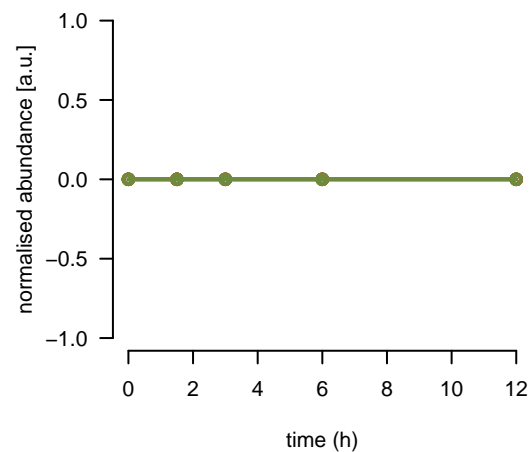**fraction: 7****fraction: 8****fraction: 9**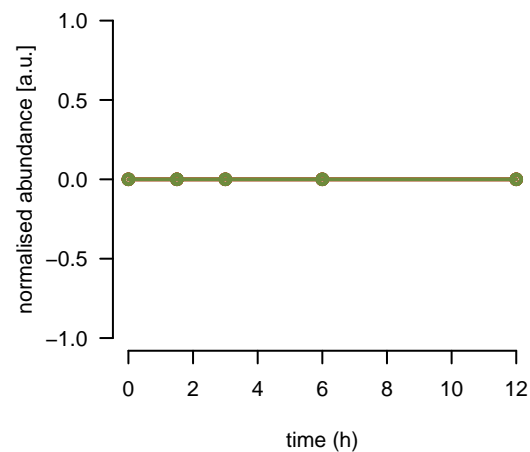**abundances**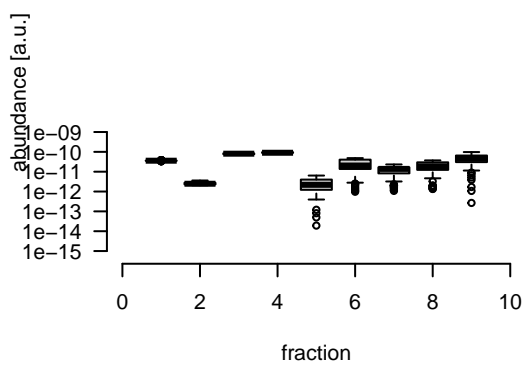**fluxes**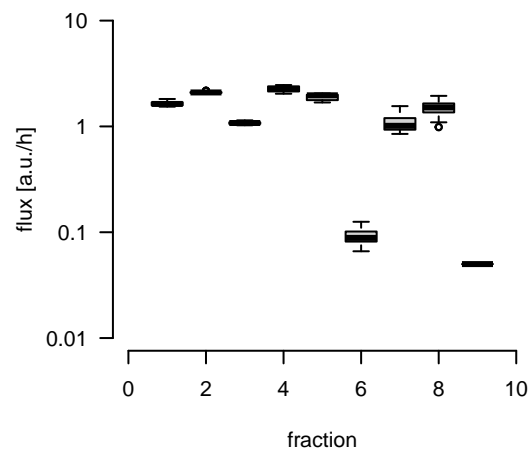

**mL37 fraction: 1**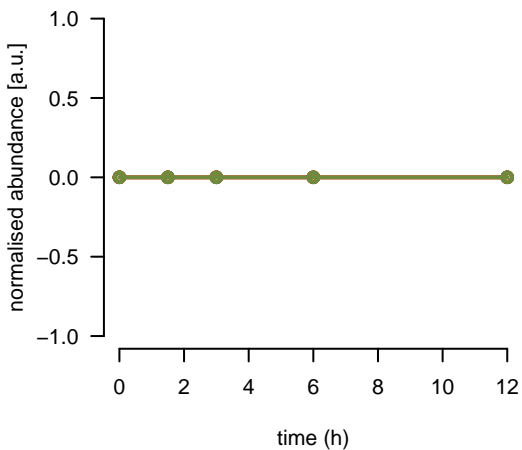**fraction: 2**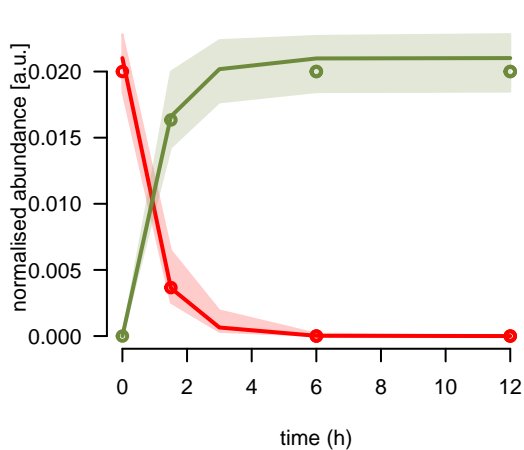**fraction: 3**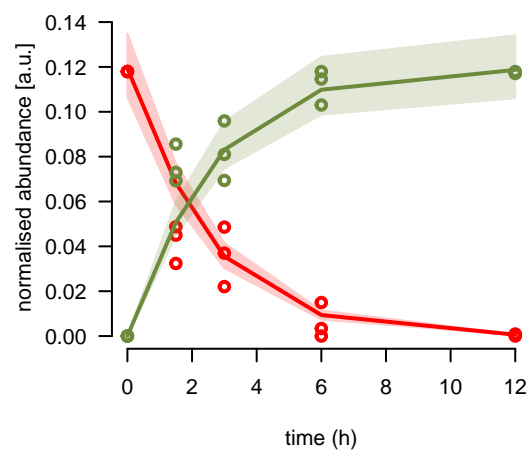**fraction: 4**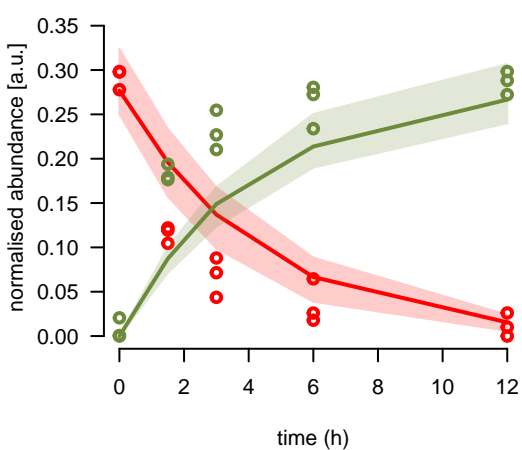**fraction: 5**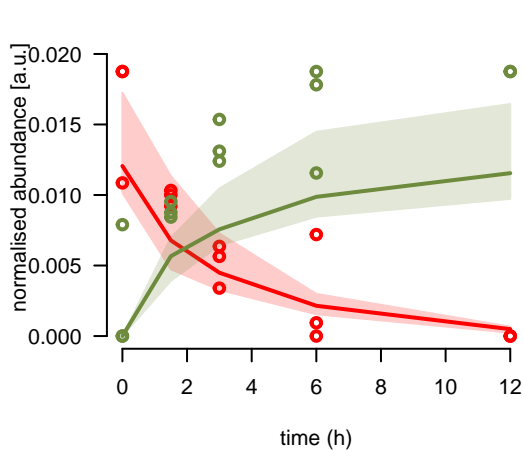**fraction: 6**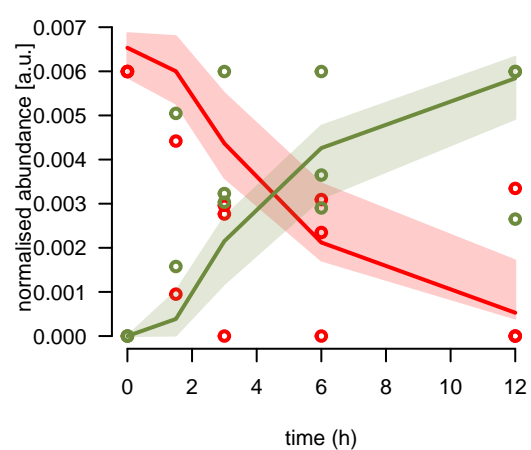**fraction: 7**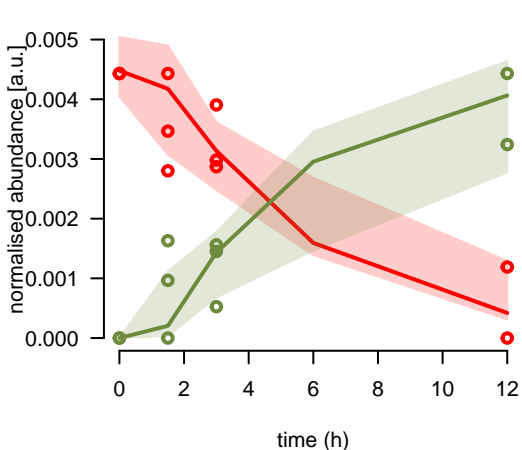**fraction: 8**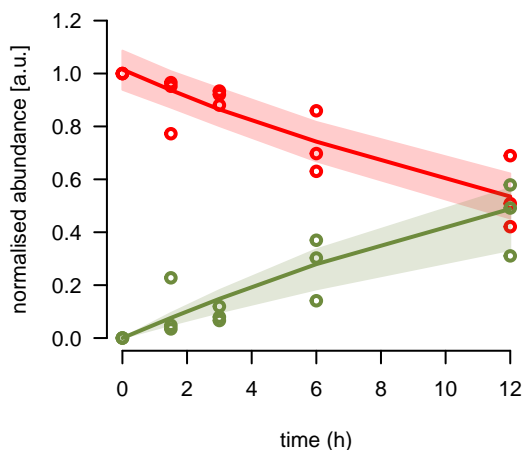**fraction: 9**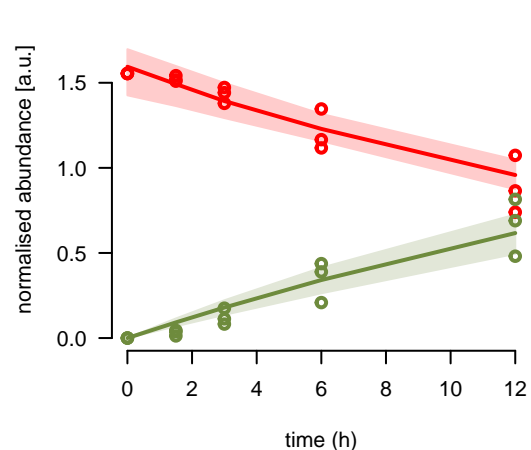**abundances**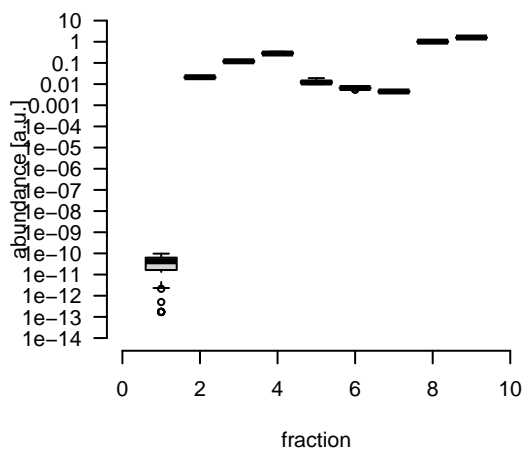**fluxes**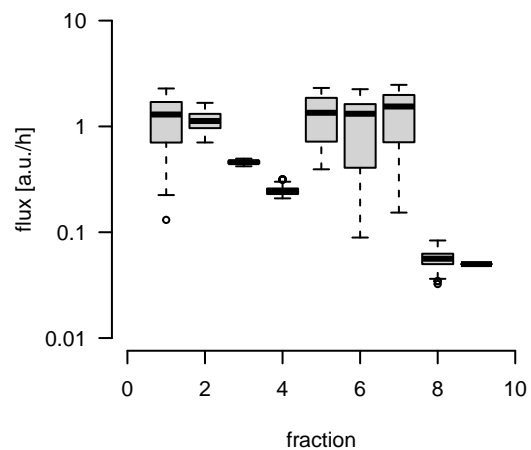

**mL38 fraction: 1**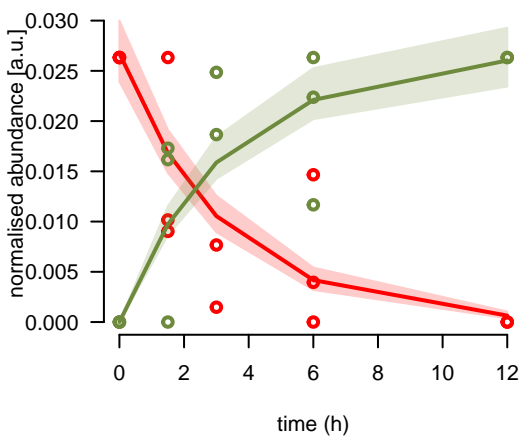**fraction: 2**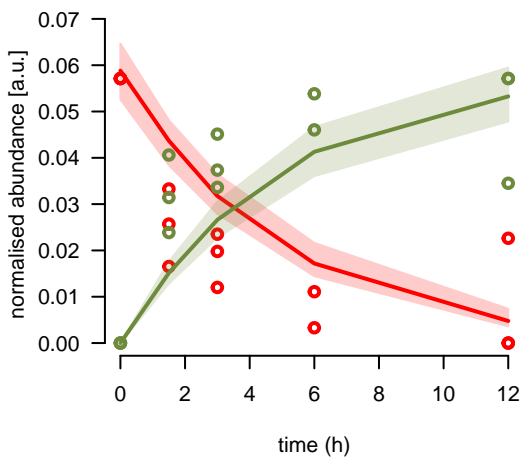**fraction: 3**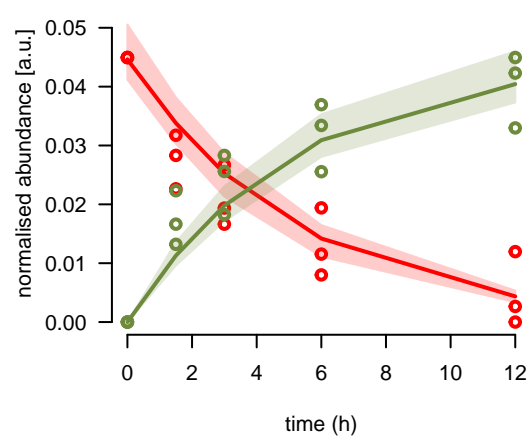**fraction: 4**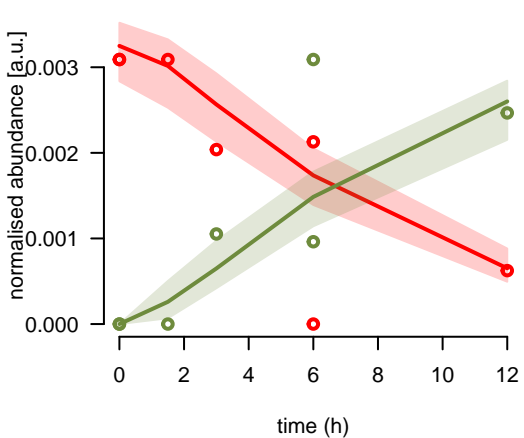**fraction: 5**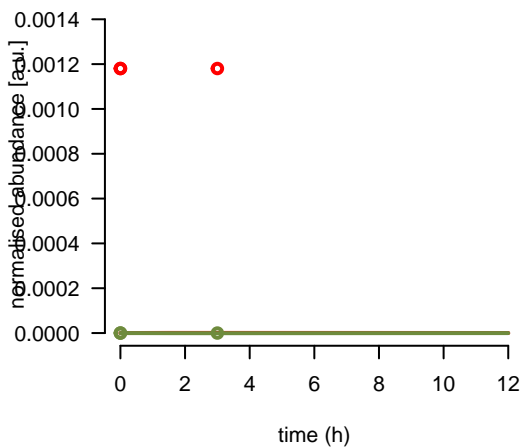**fraction: 6**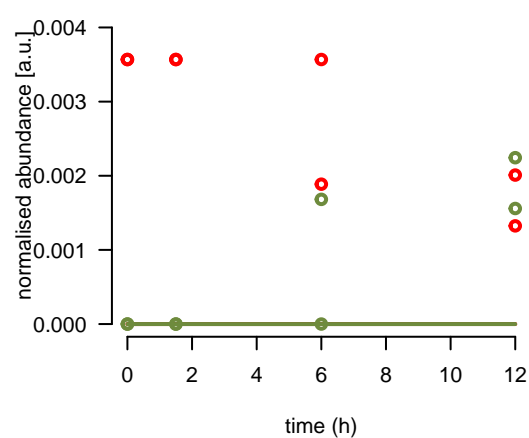**fraction: 7**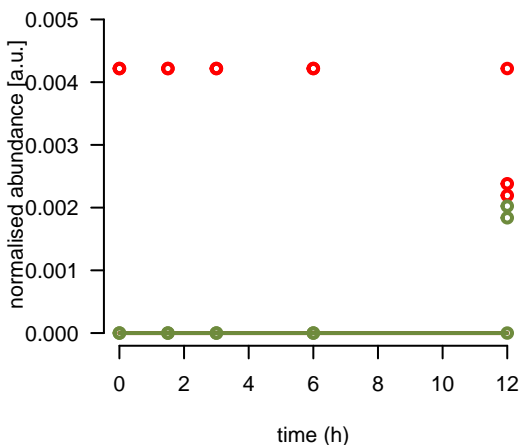**fraction: 8**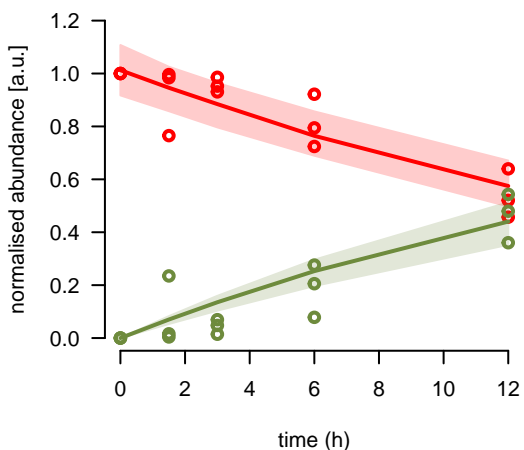**fraction: 9**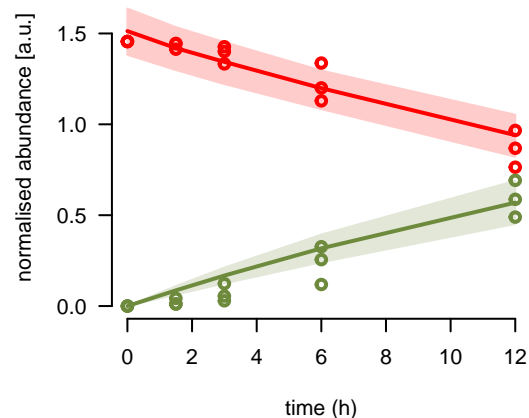**abundances**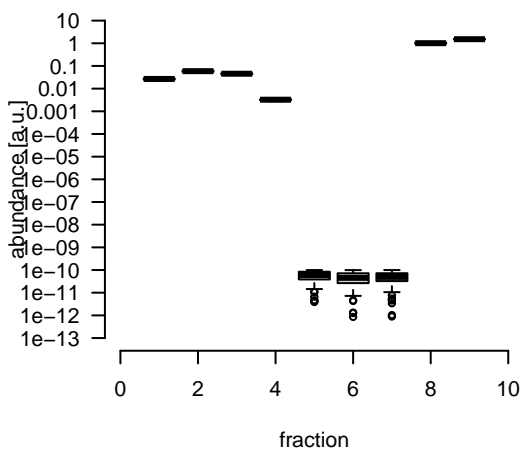**fluxes**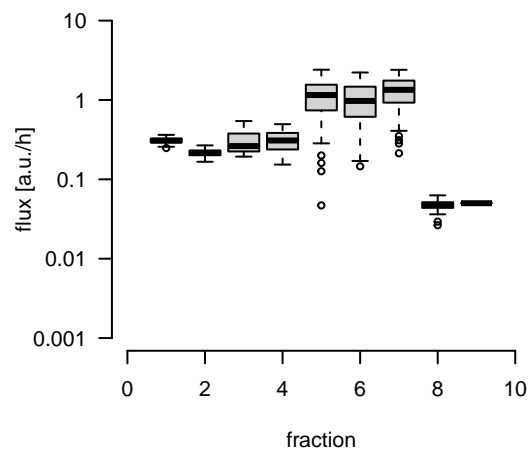



**mL39 fraction: 1**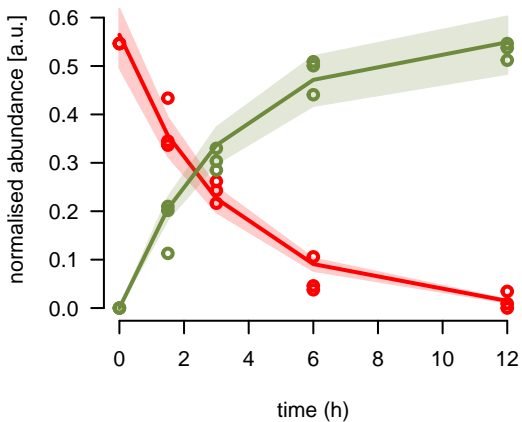**fraction: 2**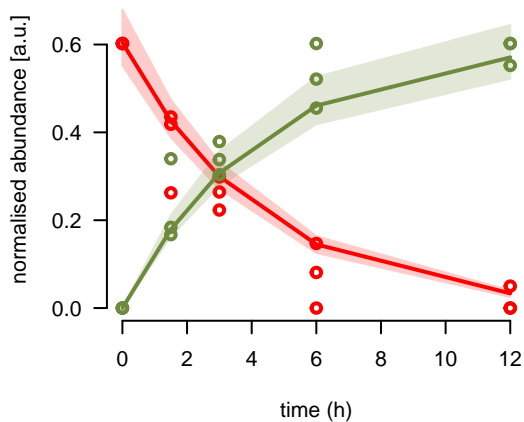**fraction: 3**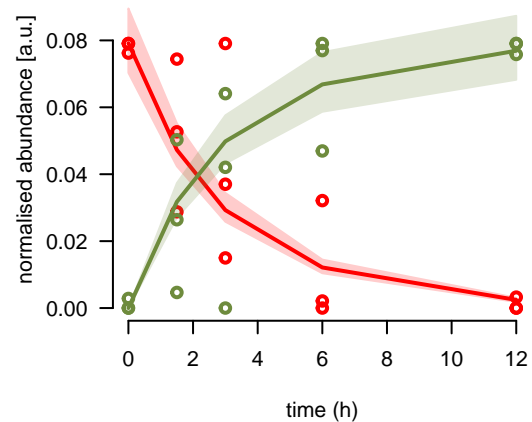**fraction: 4**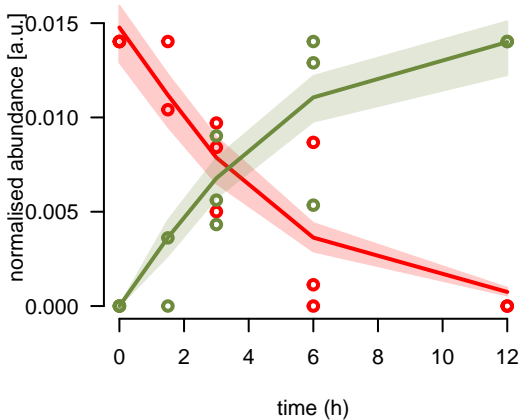**fraction: 5**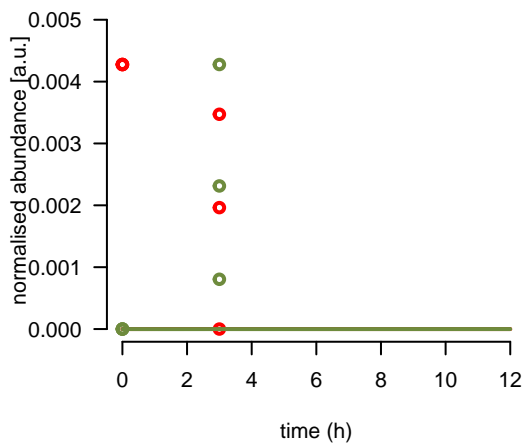**fraction: 6**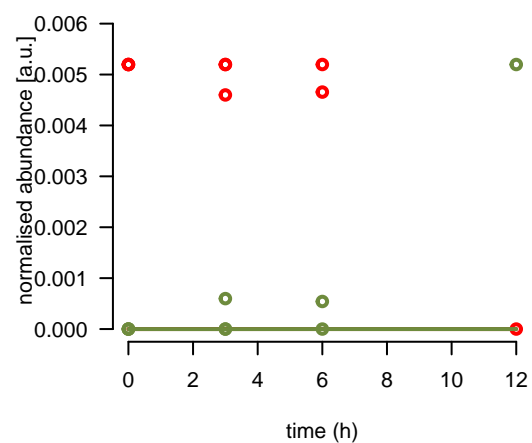**fraction: 7**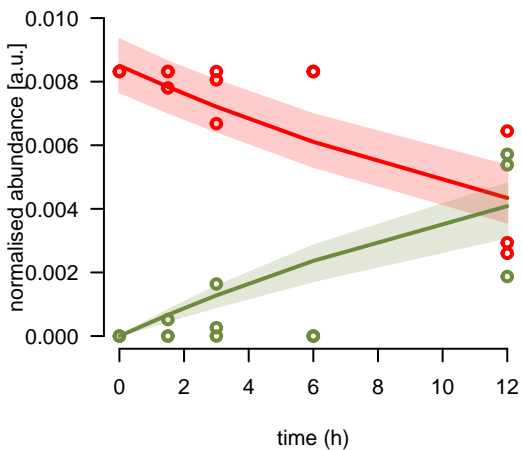**fraction: 8**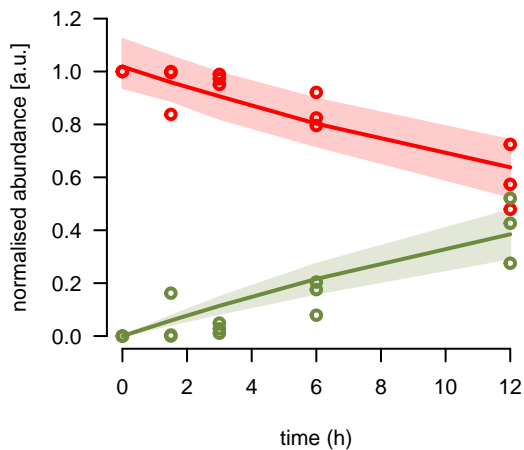**fraction: 9**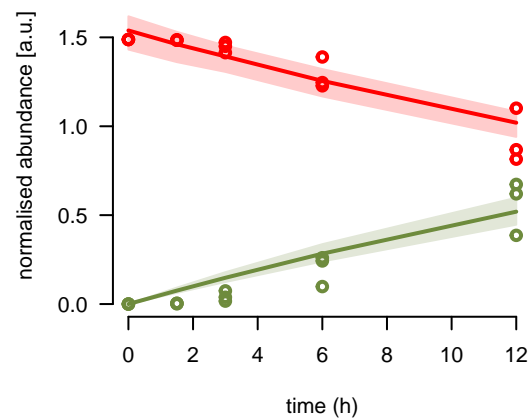**abundances**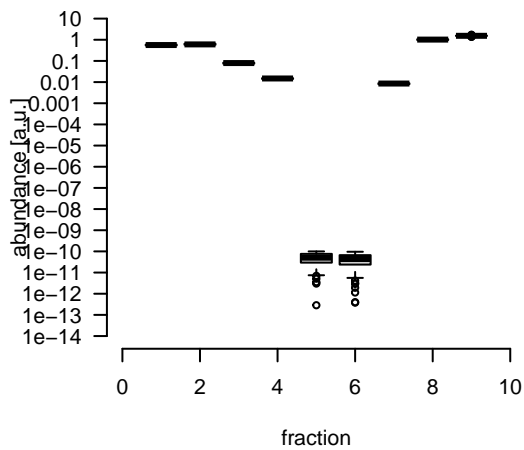**fluxes**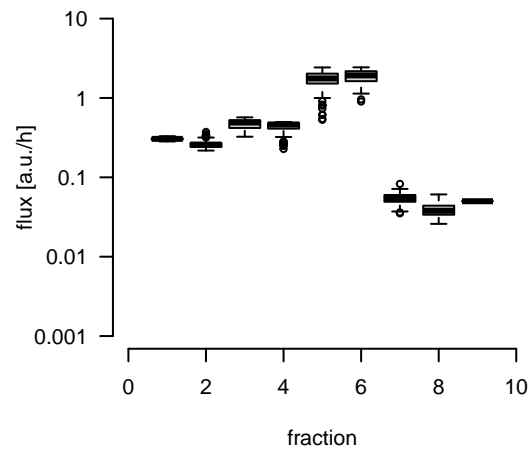

**mL40 fraction: 1**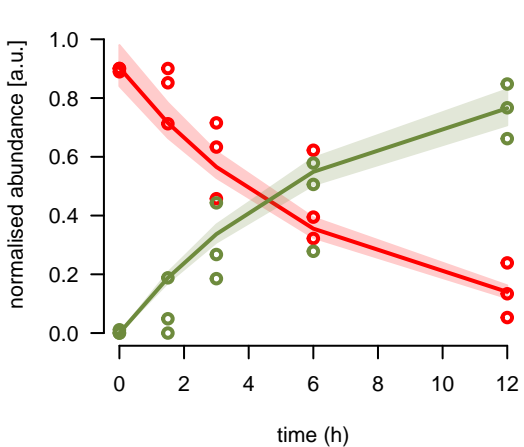**fraction: 2**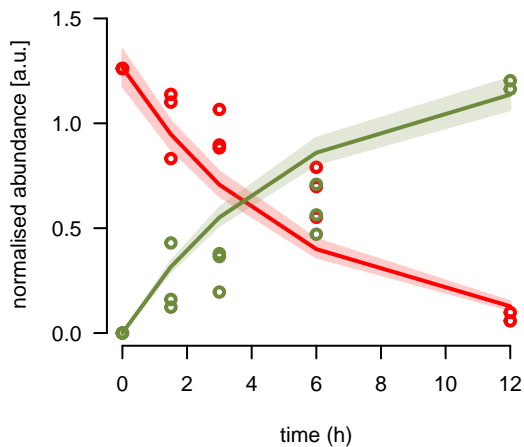**fraction: 3**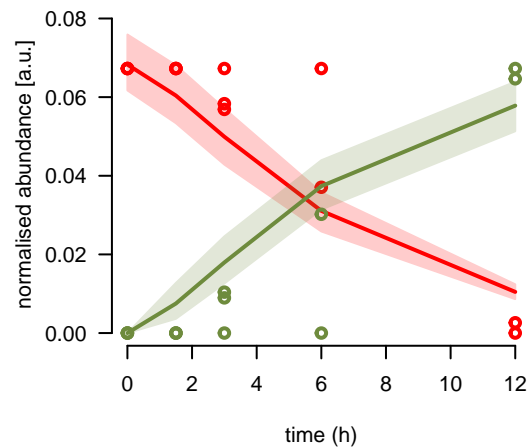**fraction: 4**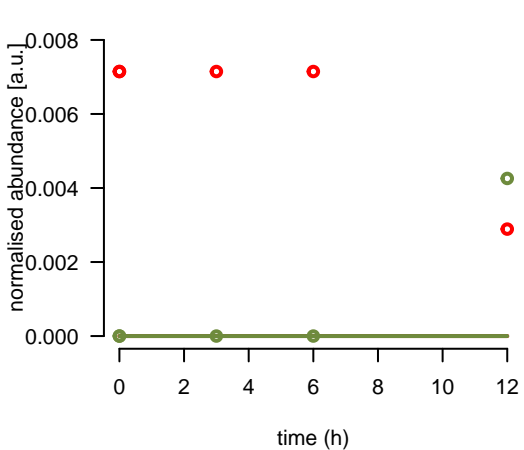**fraction: 5**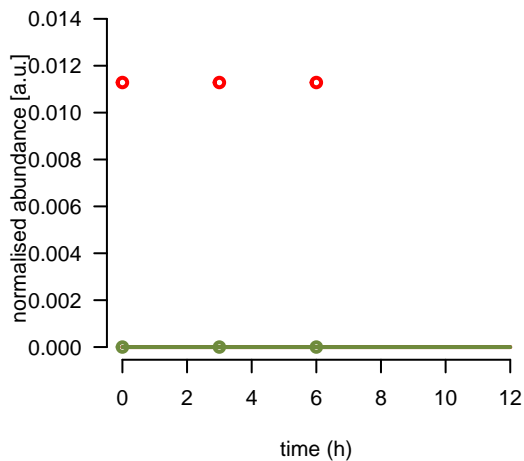**fraction: 6**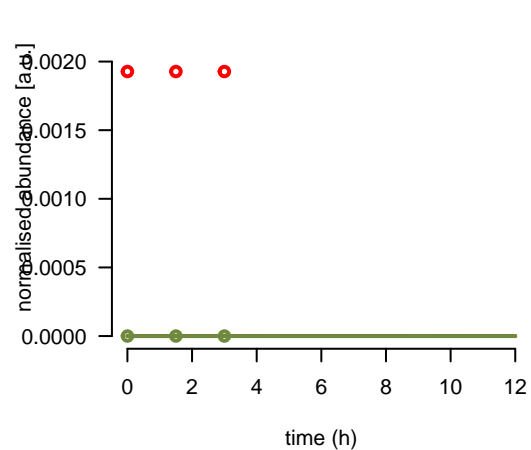**fraction: 7**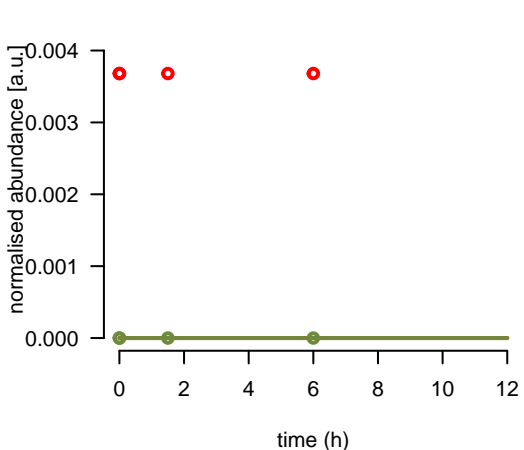**fraction: 8**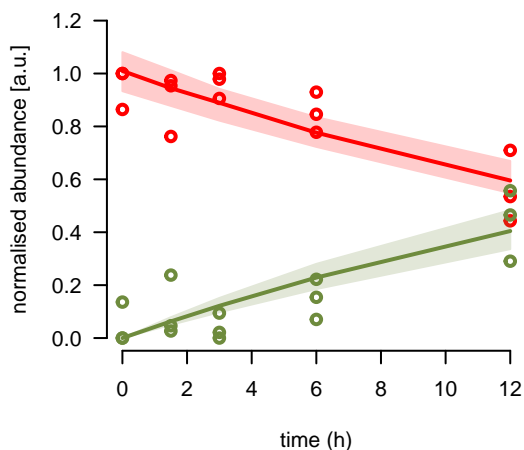**fraction: 9**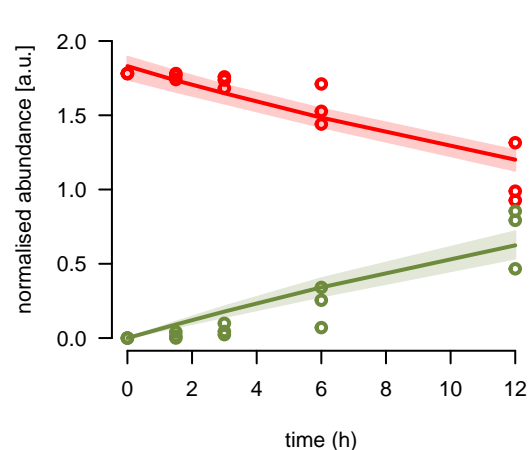**abundances**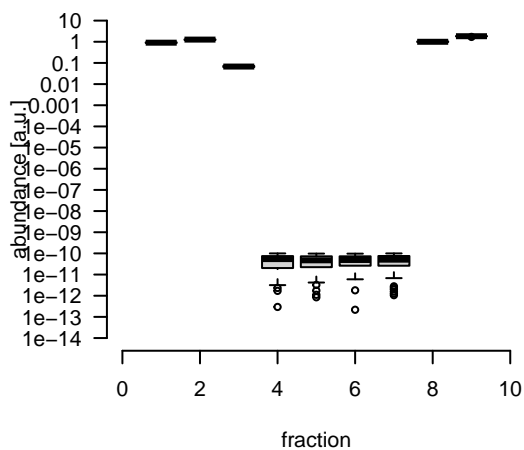**fluxes**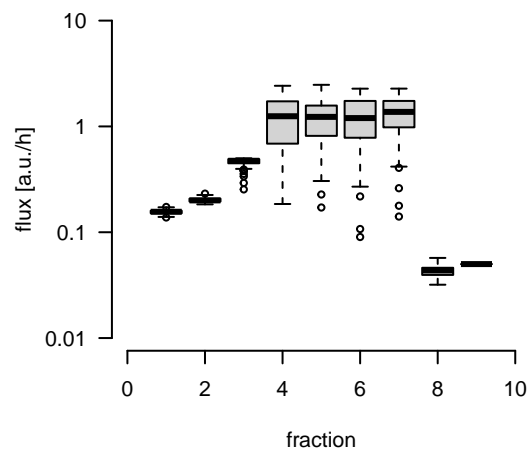

**mL41 fraction: 1**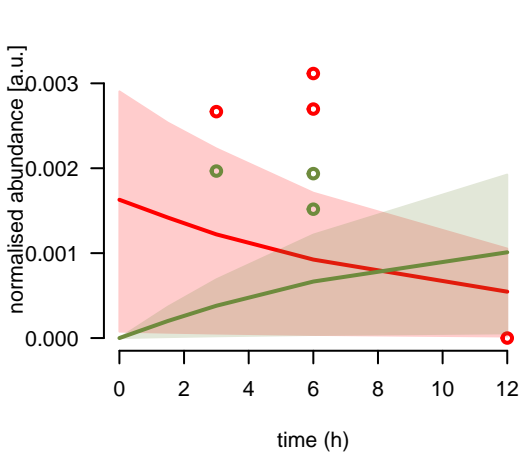**fraction: 2**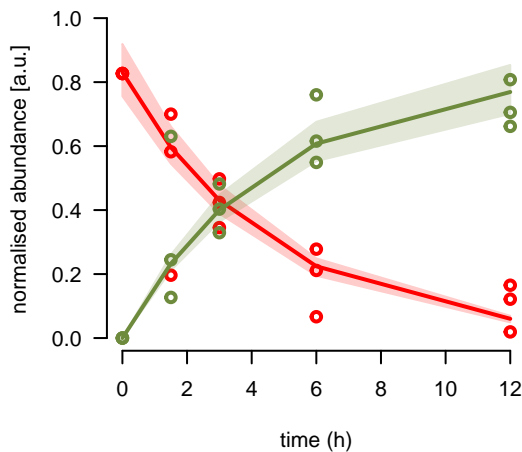**fraction: 3**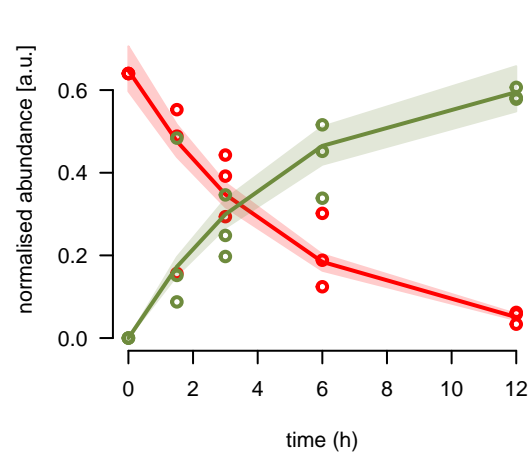**fraction: 4**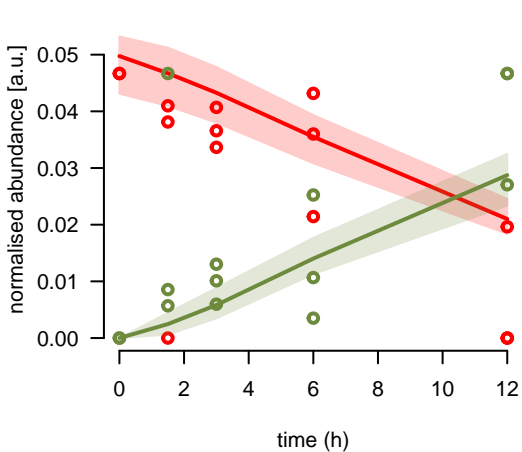**fraction: 5**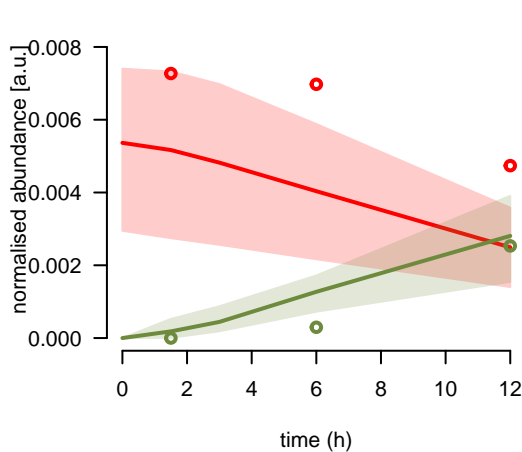**fraction: 6**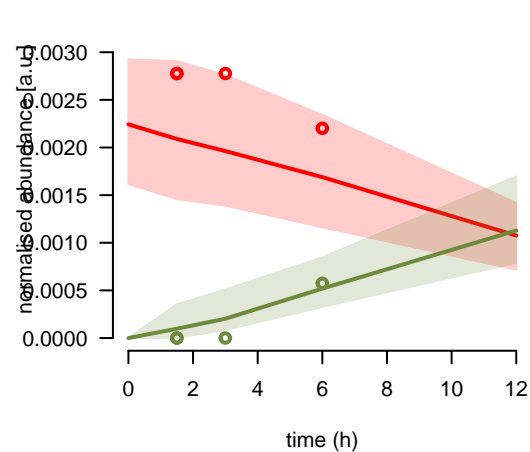**fraction: 7**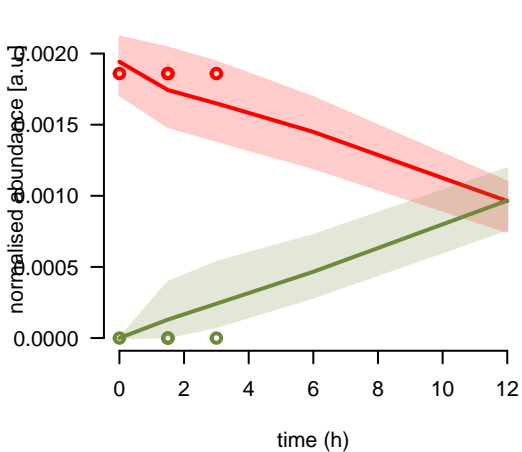**fraction: 8**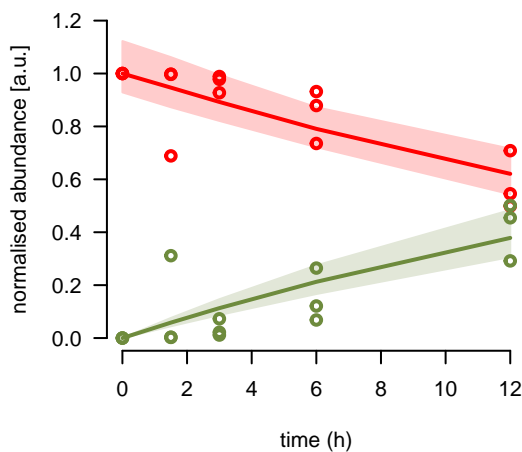**fraction: 9**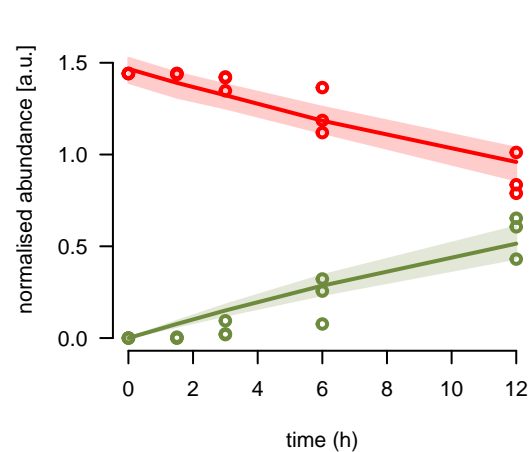**abundances**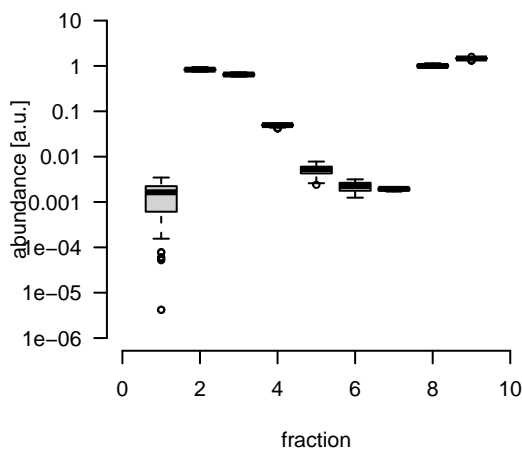**fluxes**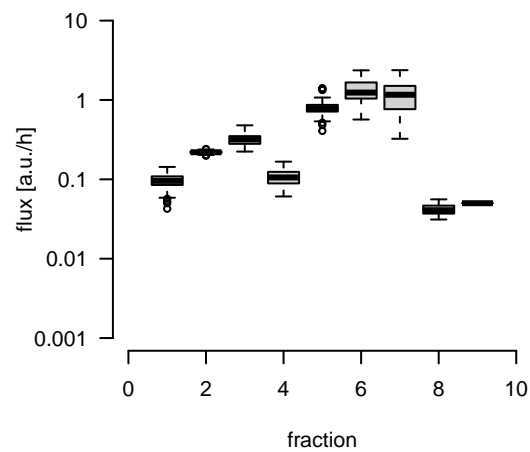

**mL42 fraction: 1****fraction: 2**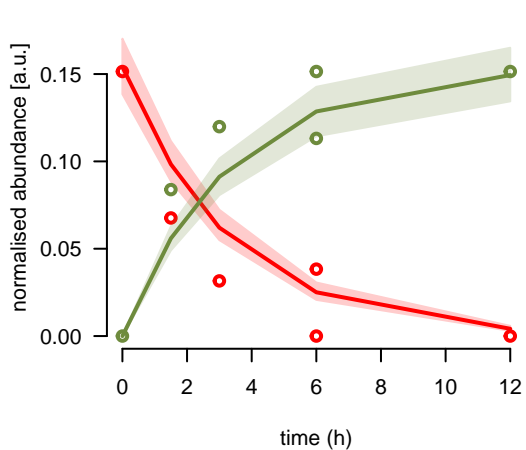**fraction: 3**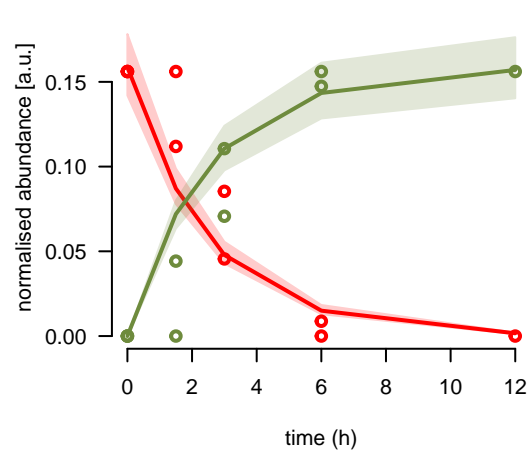**fraction: 4**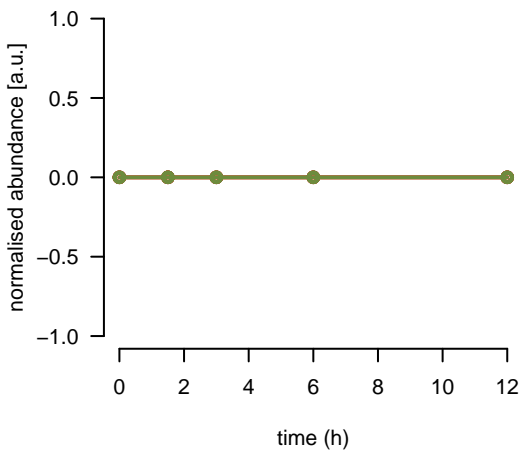**fraction: 5**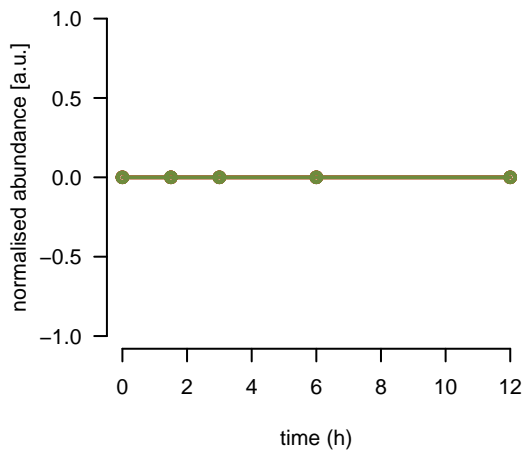**fraction: 6**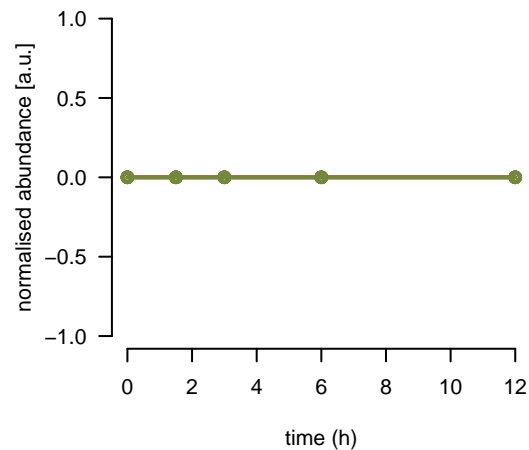**fraction: 7****fraction: 8**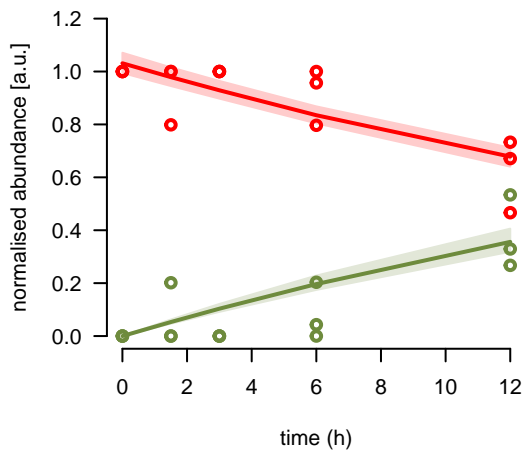**fraction: 9**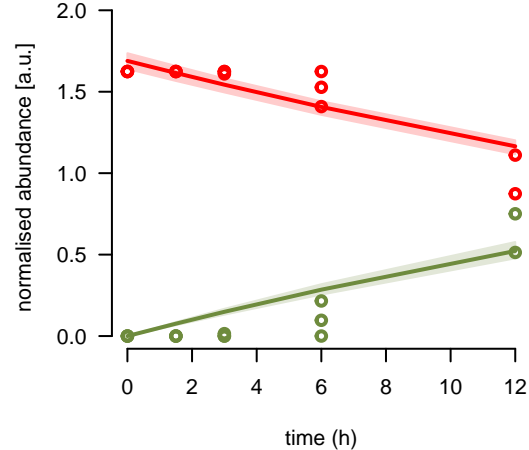**abundances**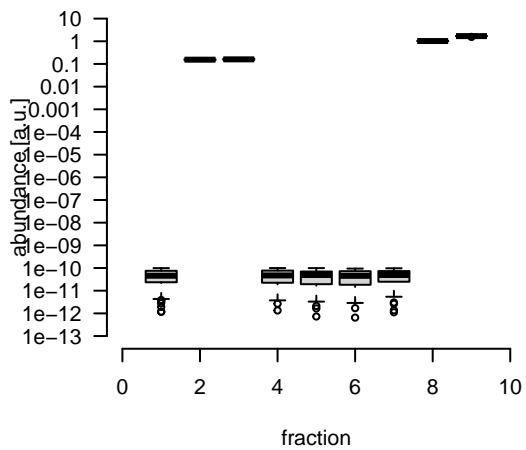**fluxes**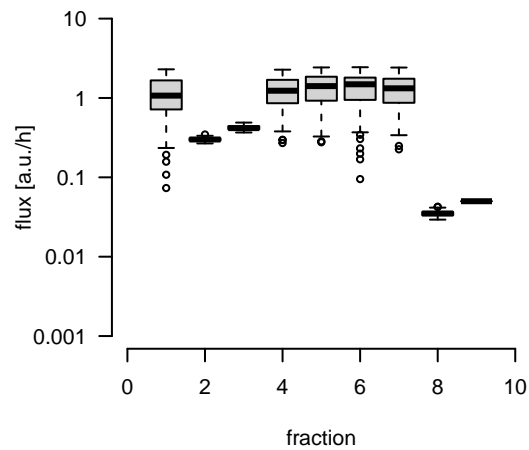

**mL43 fraction: 1**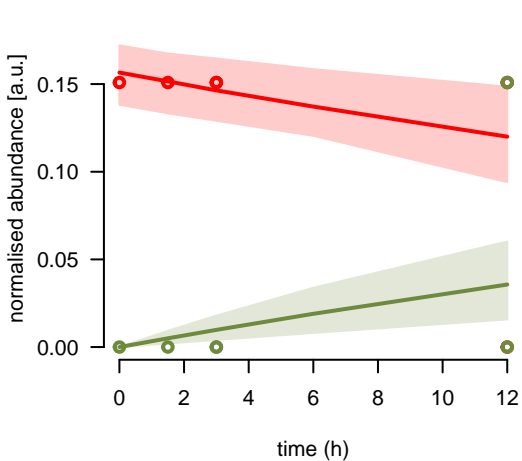**fraction: 2**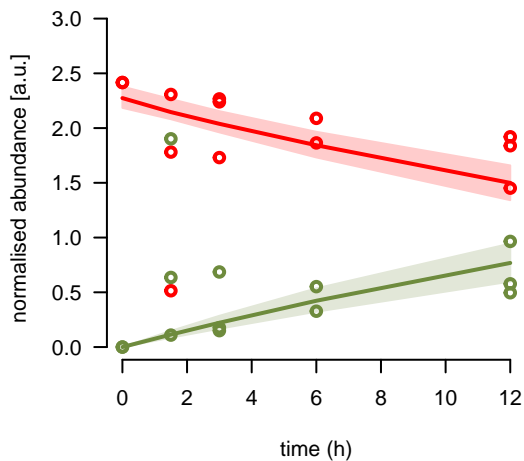**fraction: 3**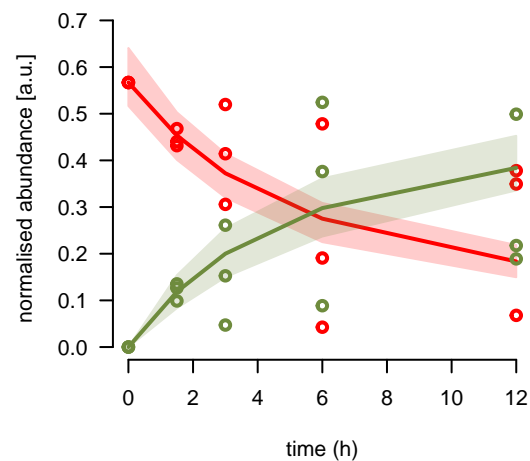**fraction: 4**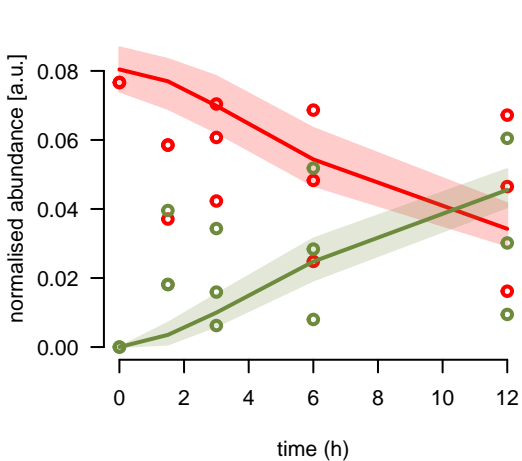**fraction: 5**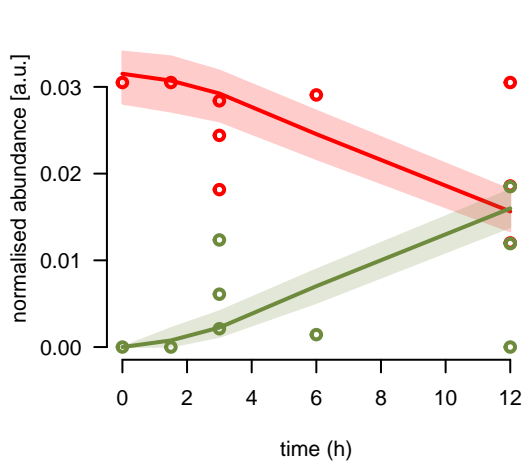**fraction: 6**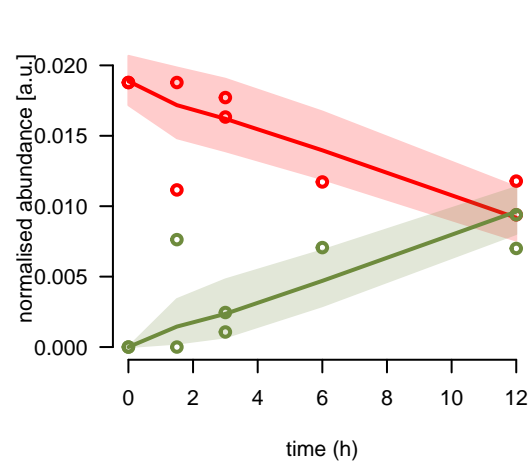**fraction: 7**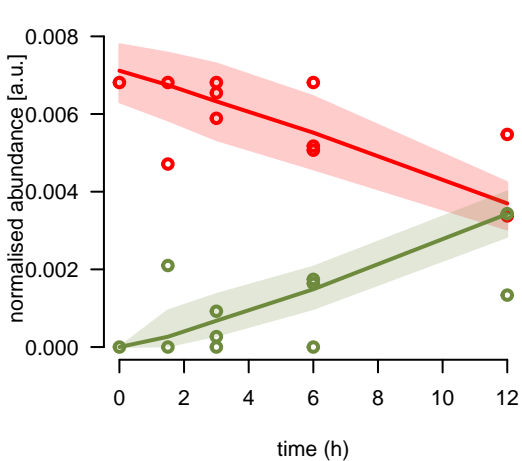**fraction: 8**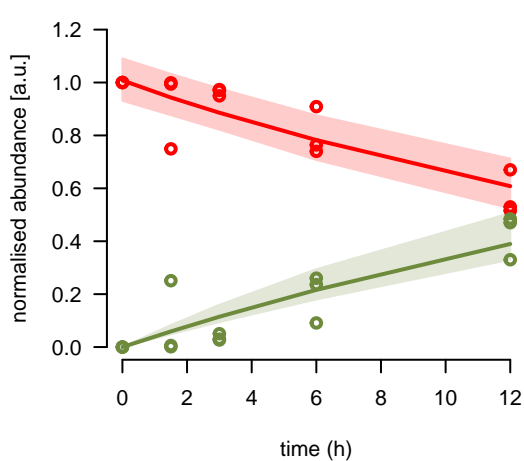**fraction: 9**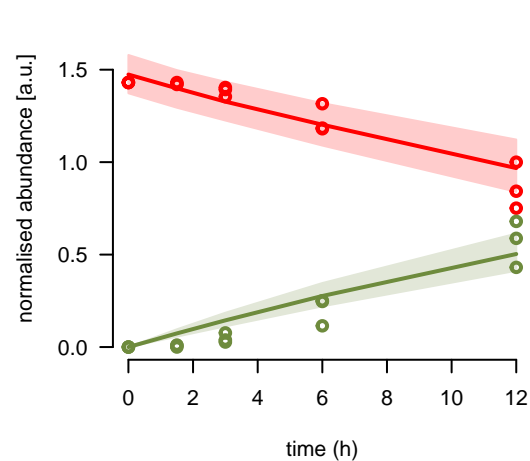**abundances**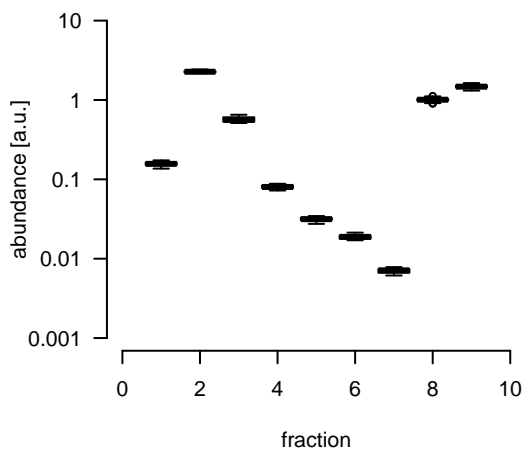**fluxes**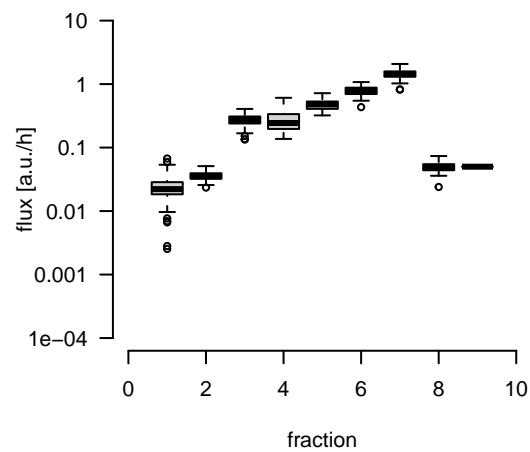

**mL44 fraction: 1****fraction: 2**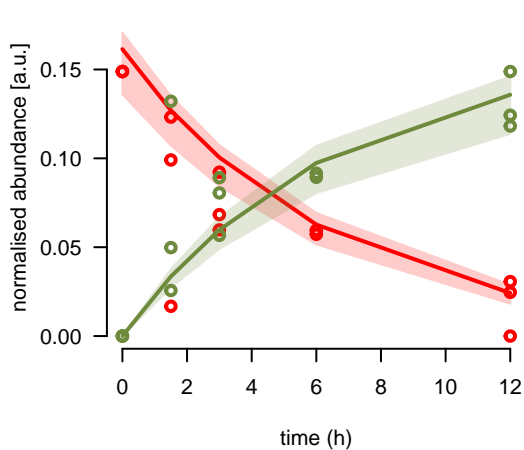**fraction: 3**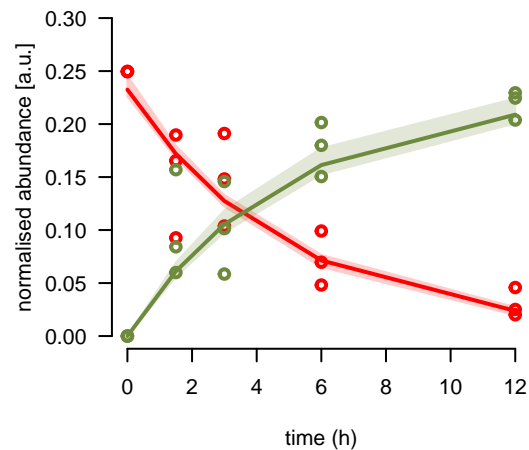**fraction: 4**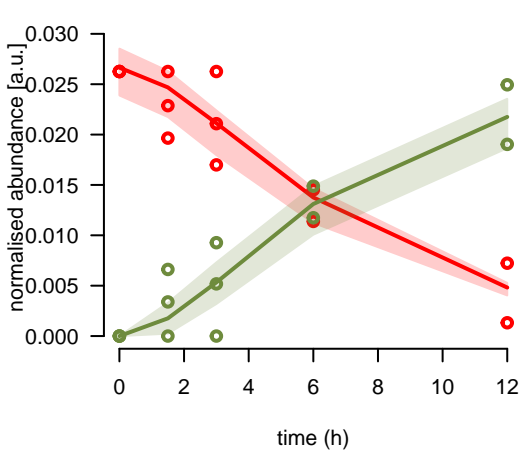**fraction: 5**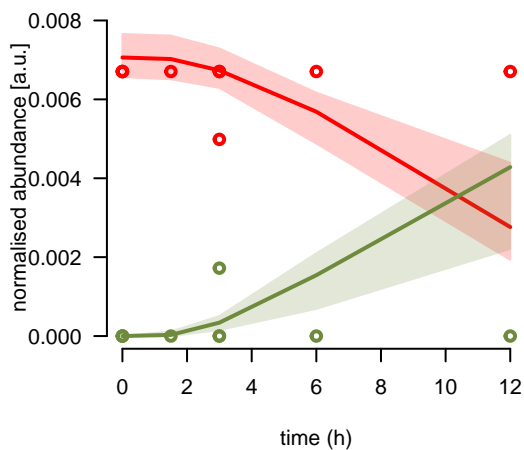**fraction: 6**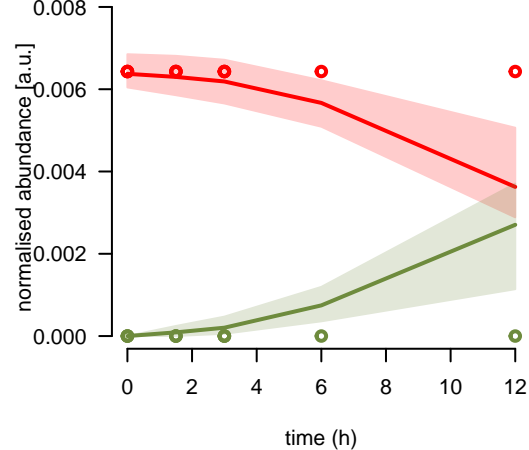**fraction: 7**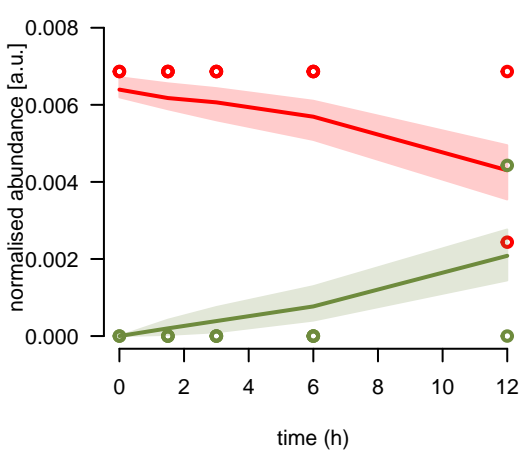**fraction: 8**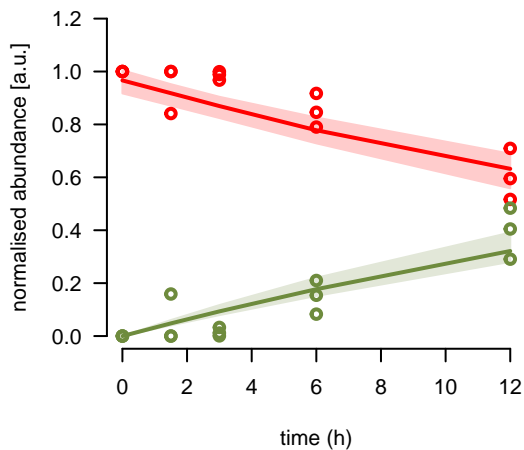**fraction: 9**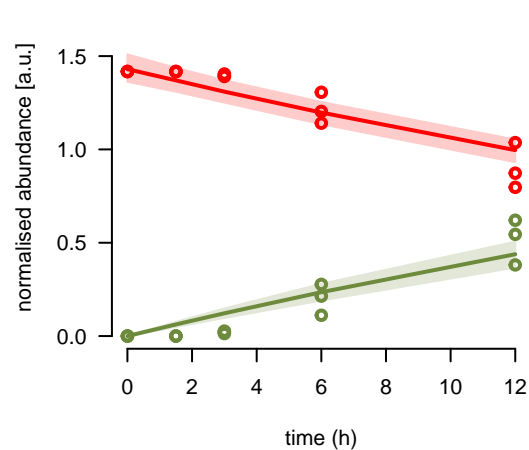**abundances**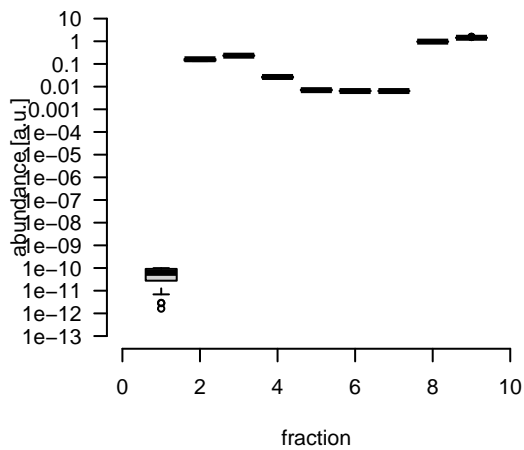**fluxes**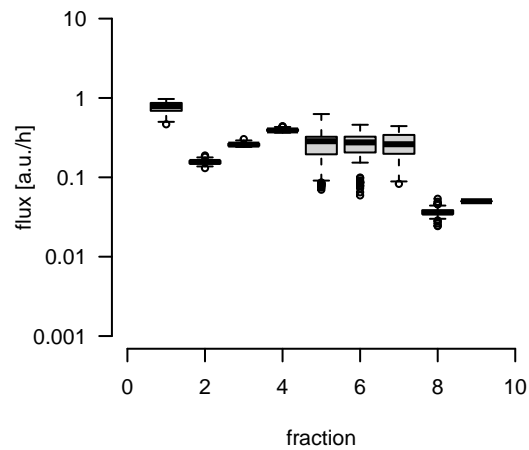

**mL45 fraction: 1**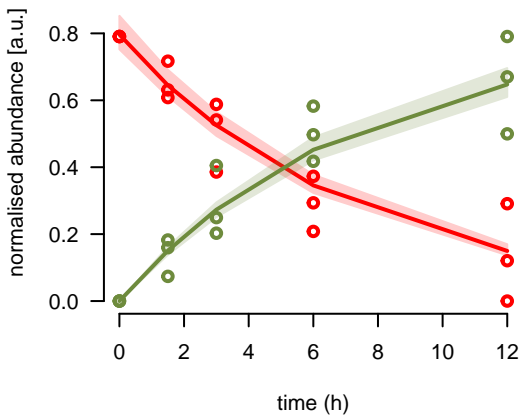**fraction: 2**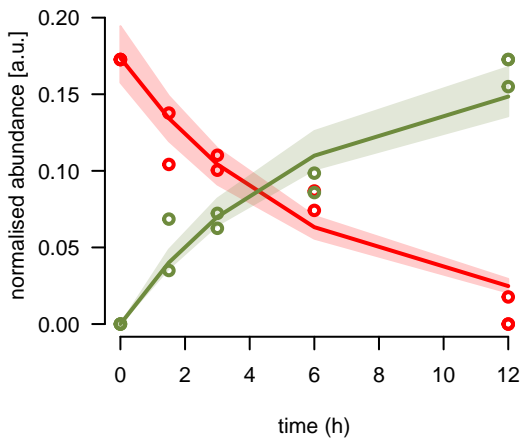**fraction: 3**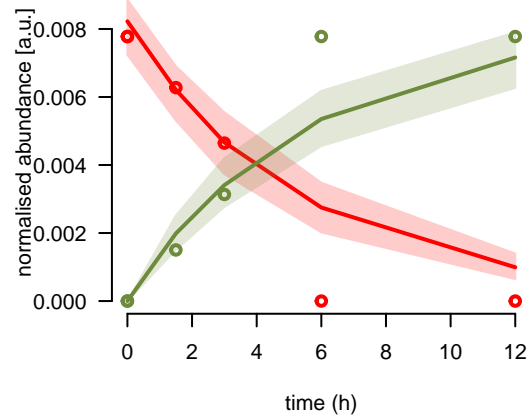**fraction: 4**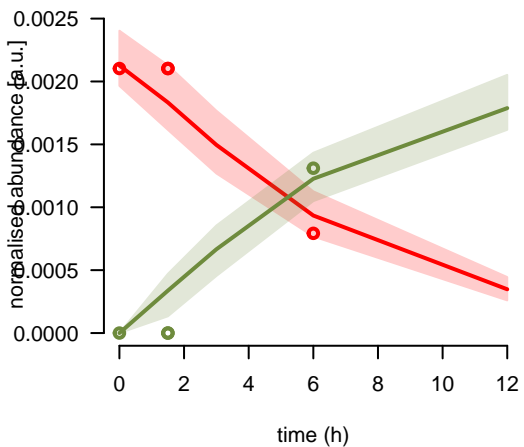**fraction: 5**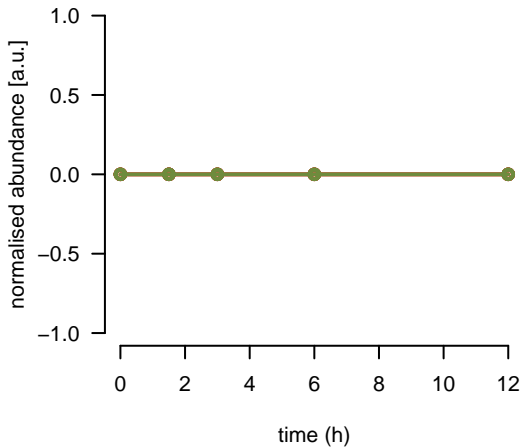**fraction: 6**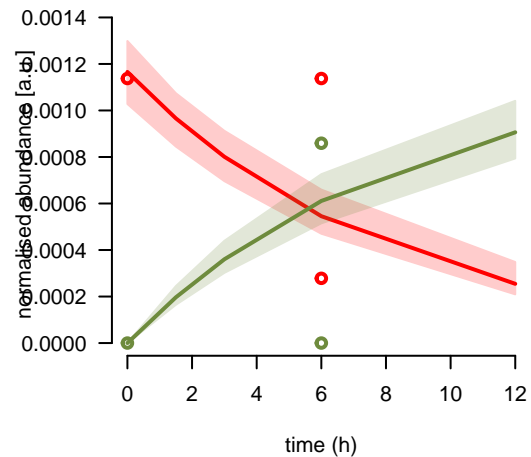**fraction: 7**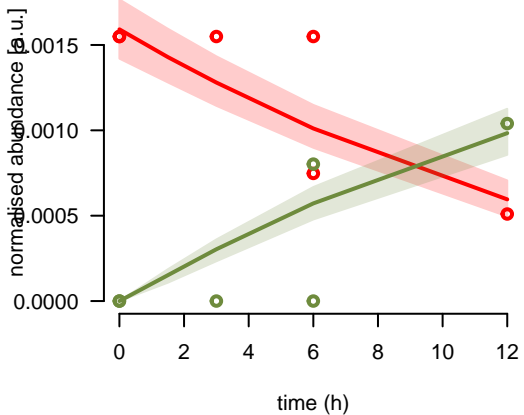**fraction: 8**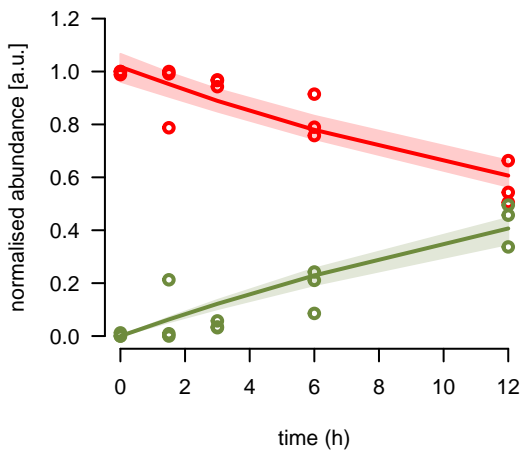**fraction: 9**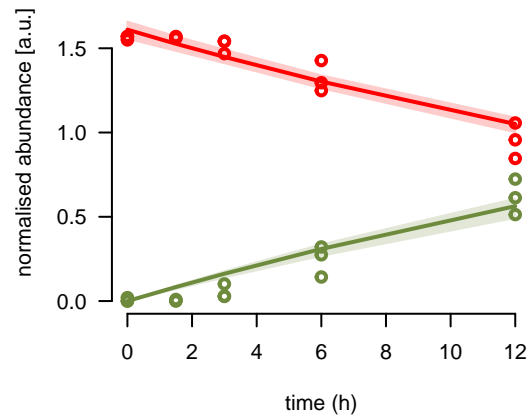**abundances**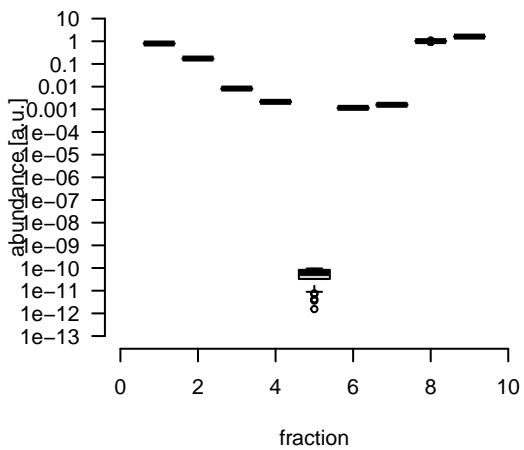**fluxes**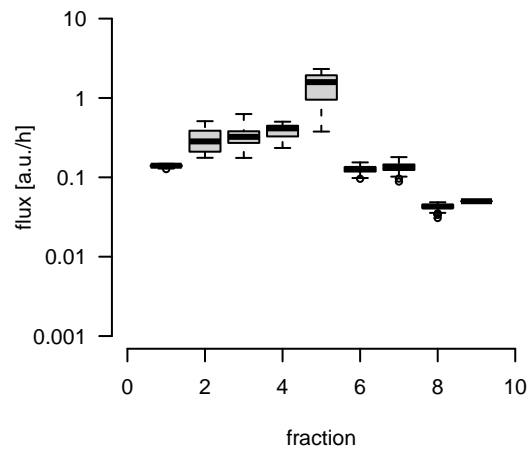

**mL46 fraction: 1**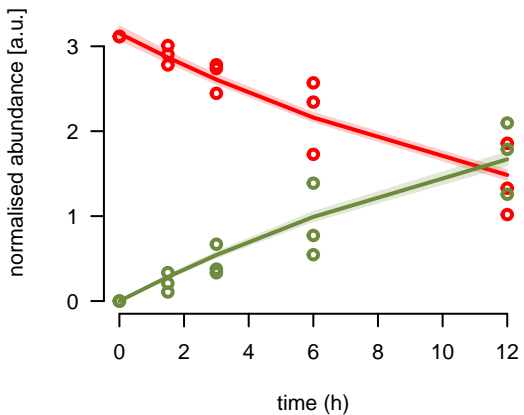**fraction: 2**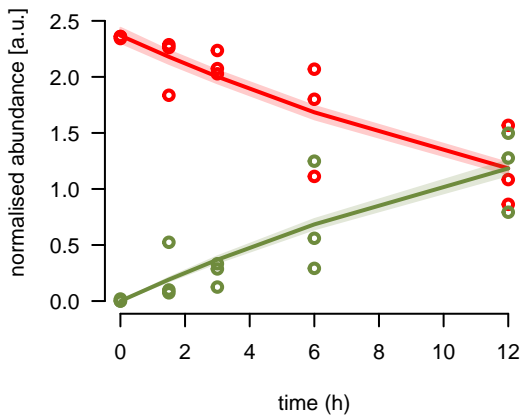**fraction: 3**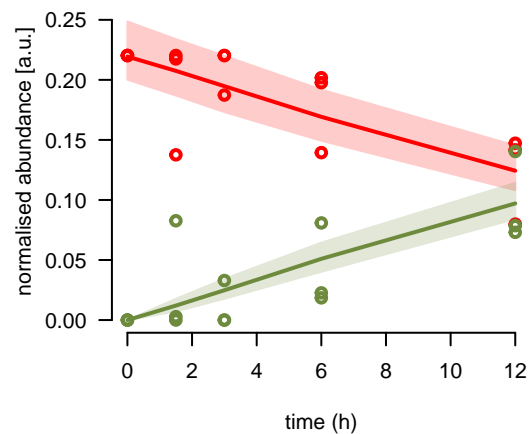**fraction: 4**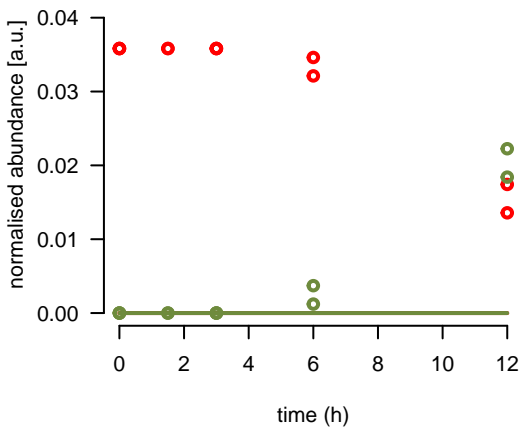**fraction: 5**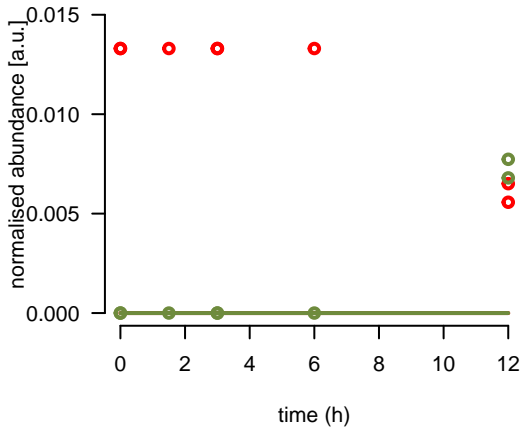**fraction: 6**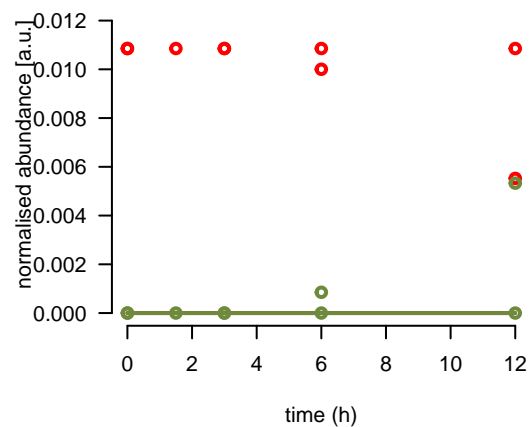**fraction: 7**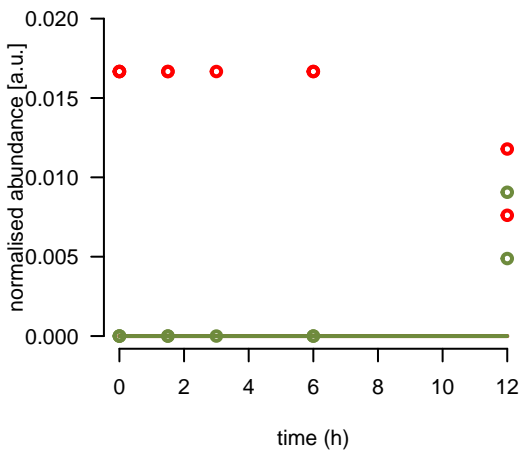**fraction: 8**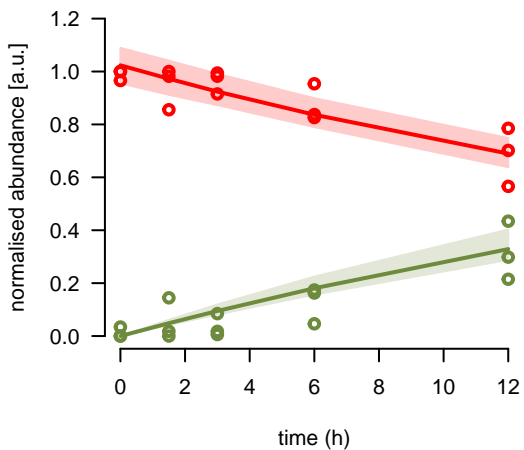**fraction: 9**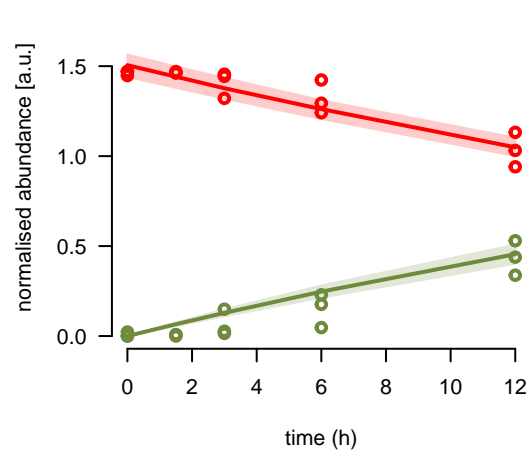**abundances**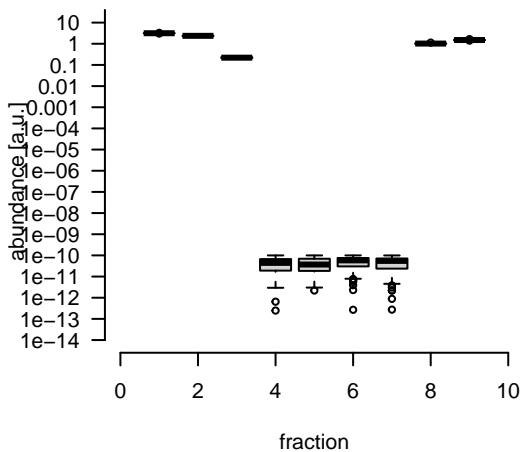**fluxes**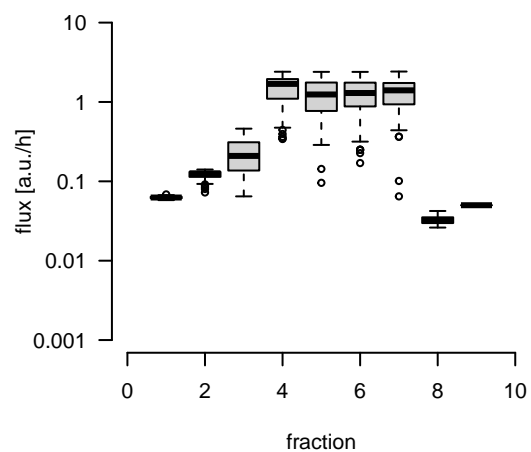



**mL48 fraction: 1**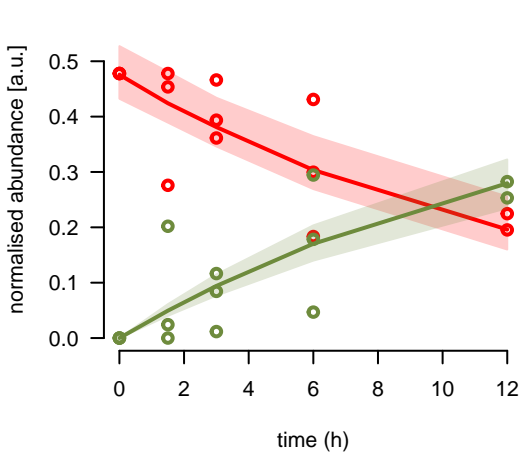**fraction: 2**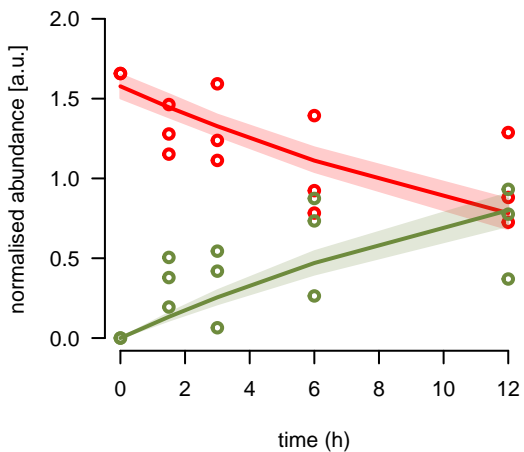**fraction: 3**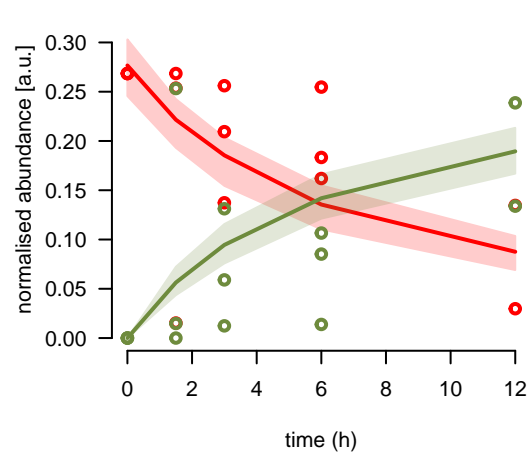**fraction: 4**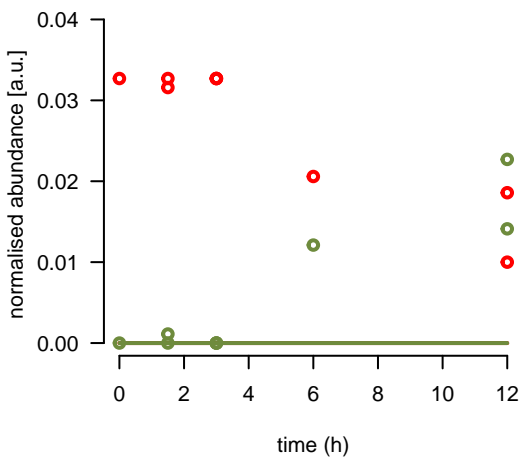**fraction: 5**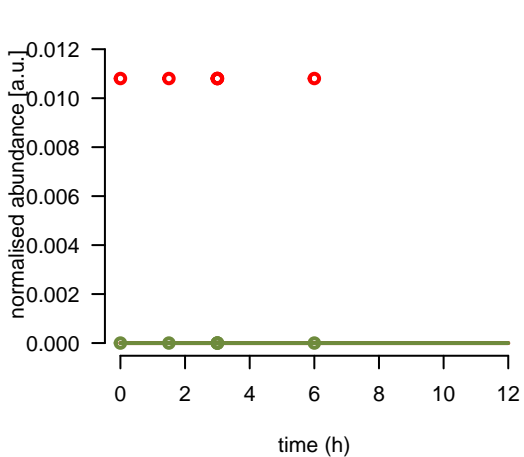**fraction: 6**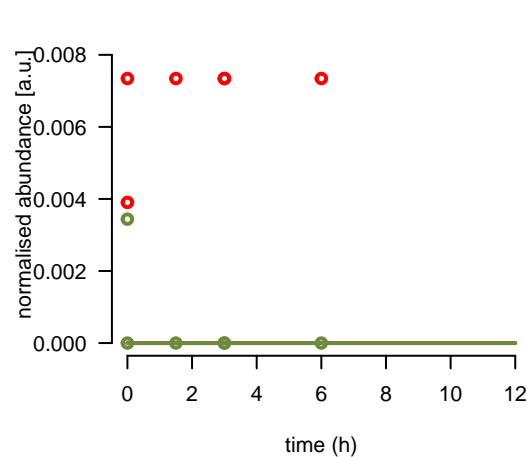**fraction: 7**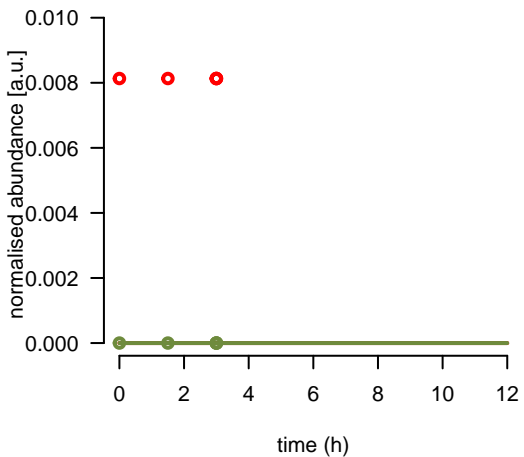**fraction: 8**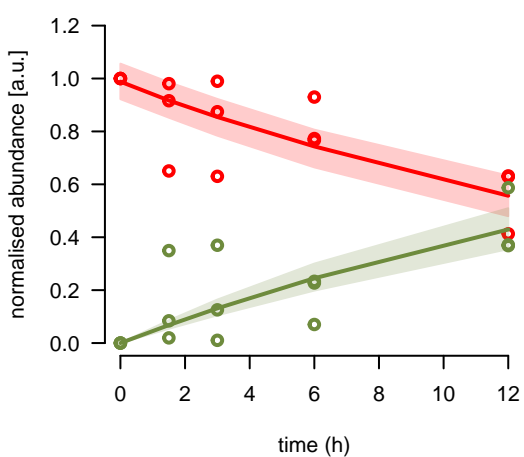**fraction: 9**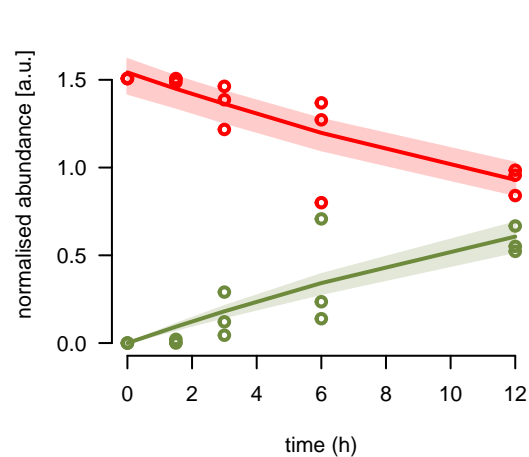**abundances**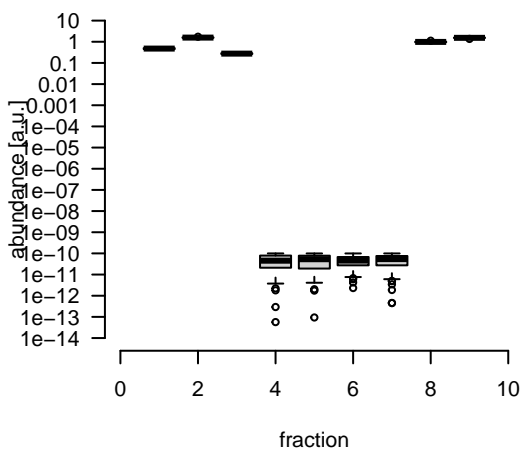**fluxes**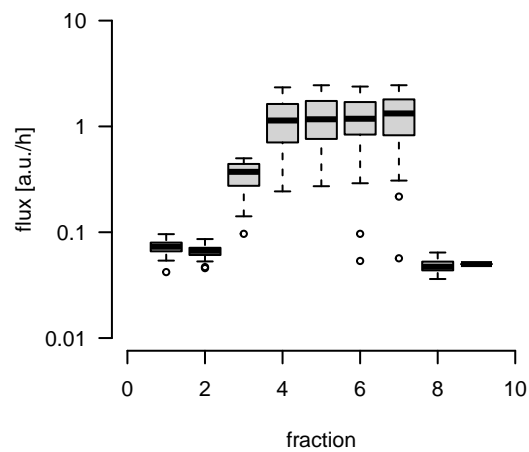

**mL49 fraction: 1**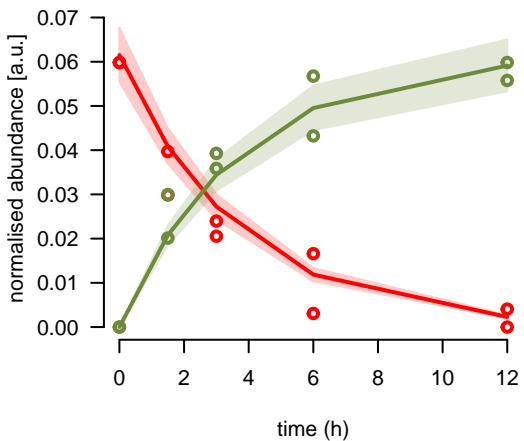**fraction: 2**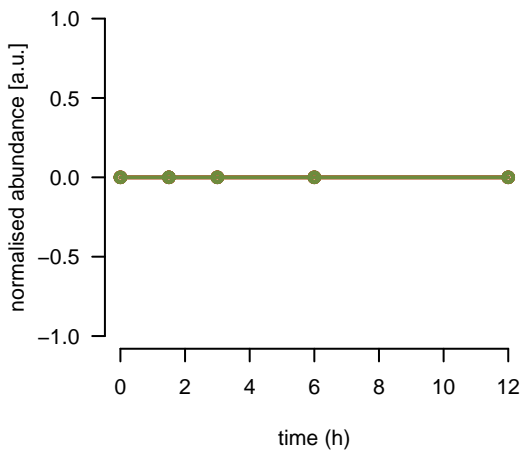**fraction: 3****fraction: 4****fraction: 5**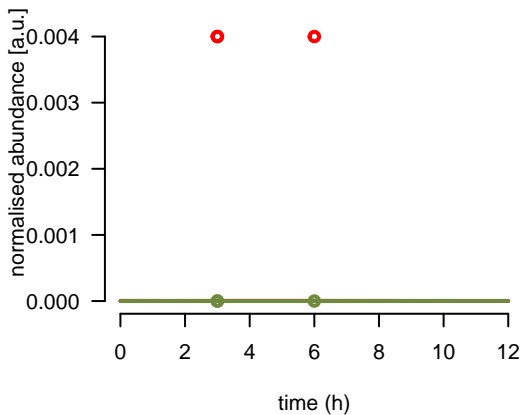**fraction: 6**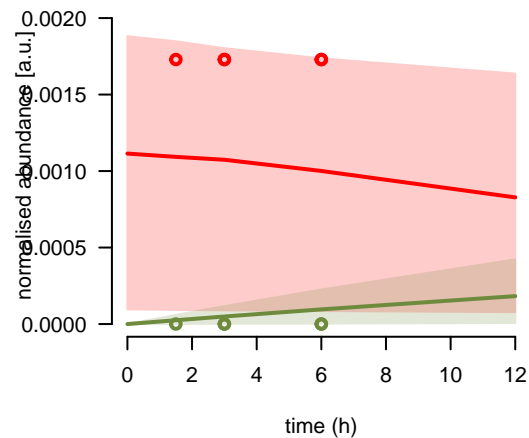**fraction: 7**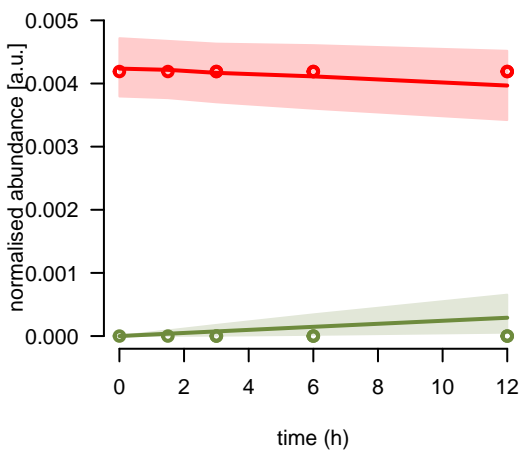**fraction: 8**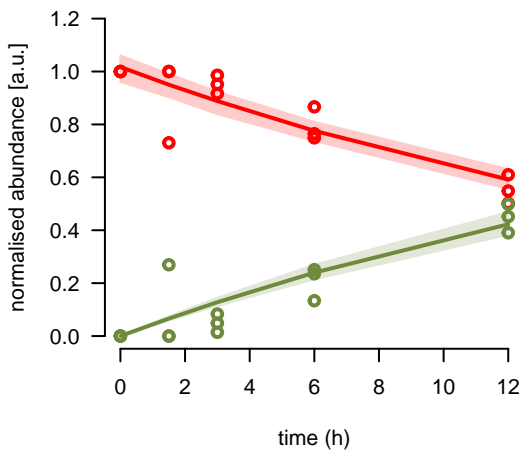**fraction: 9**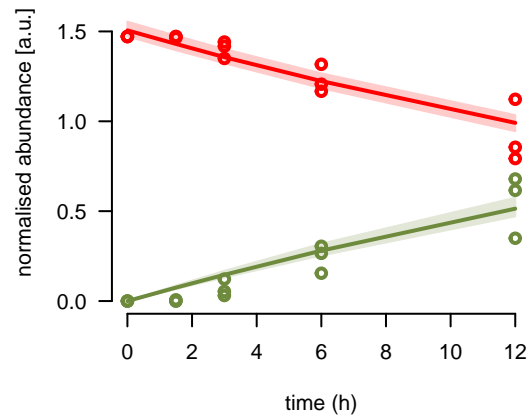**abundances**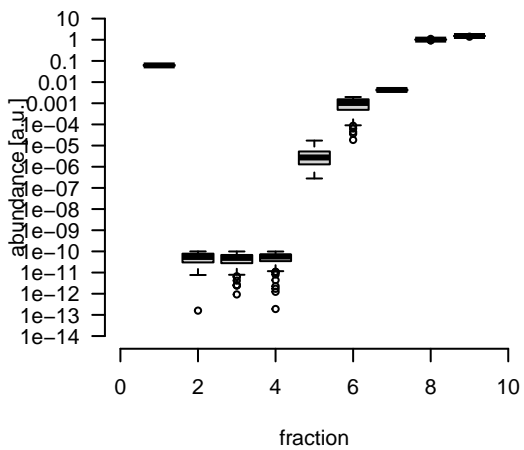**fluxes**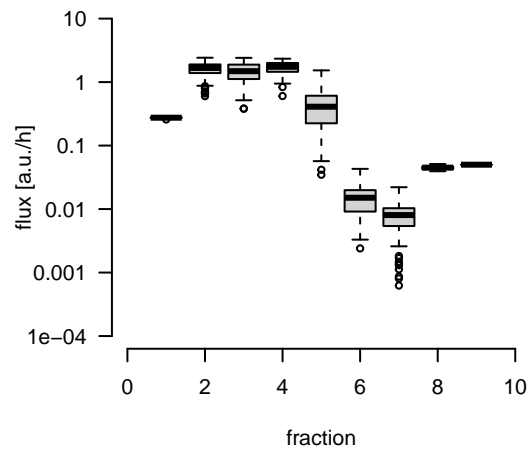

**mL50 fraction: 1**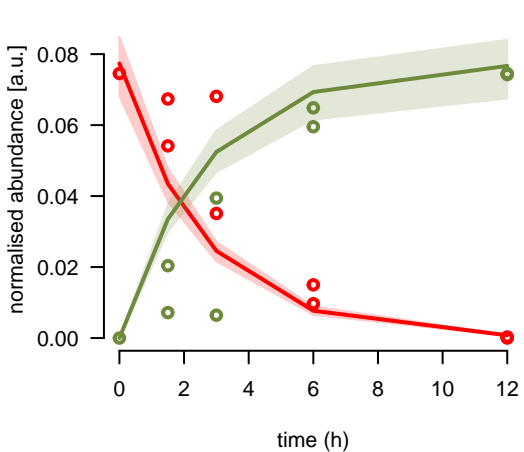**fraction: 2**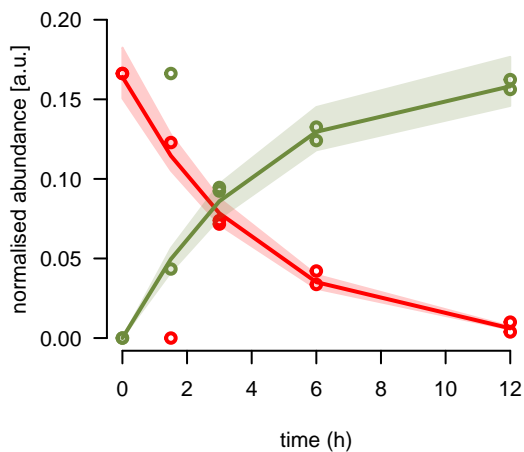**fraction: 3**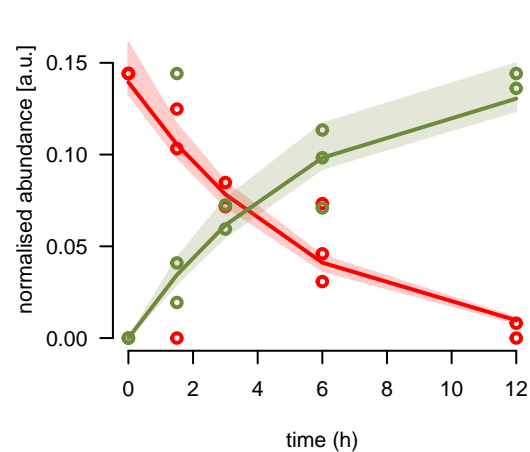**fraction: 4**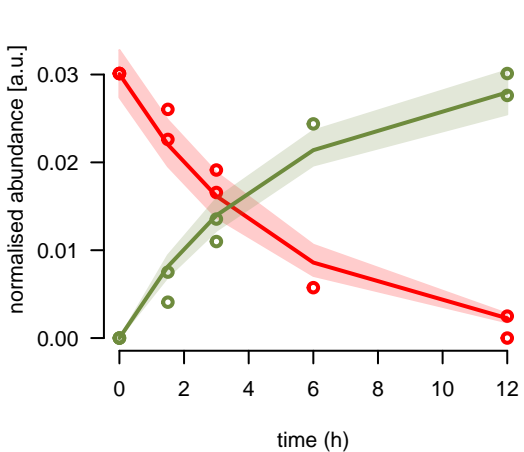**fraction: 5**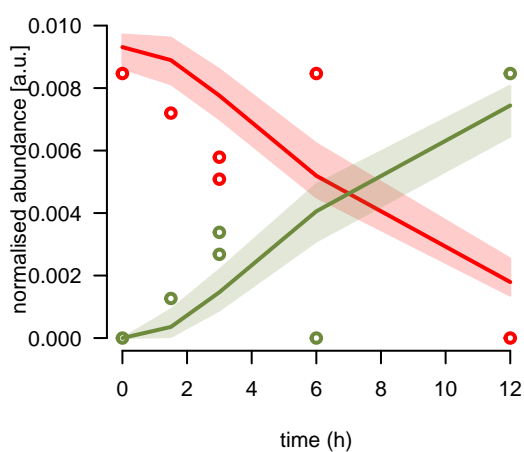**fraction: 6**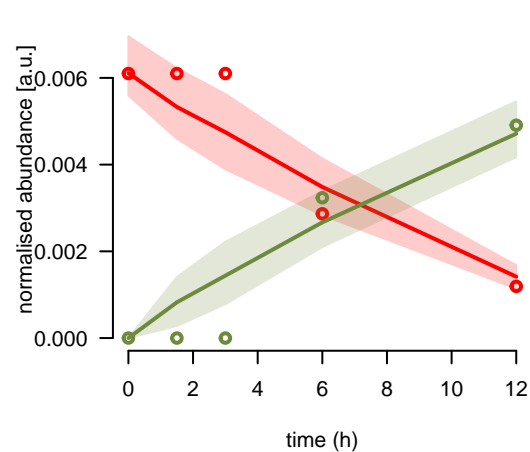**fraction: 7**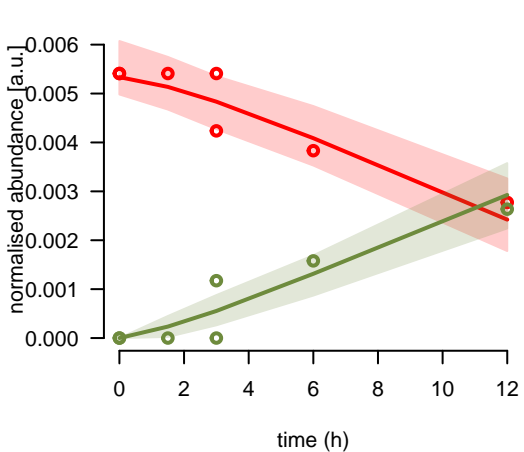**fraction: 8**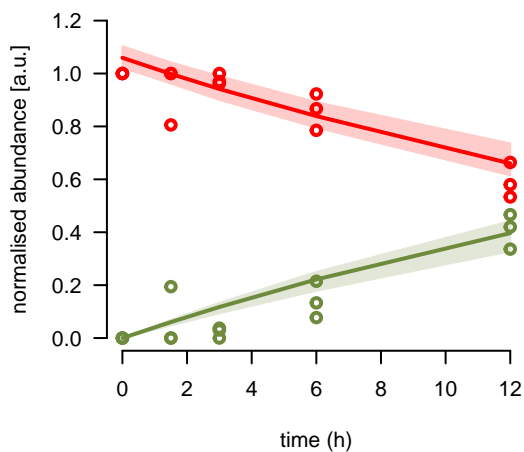**fraction: 9**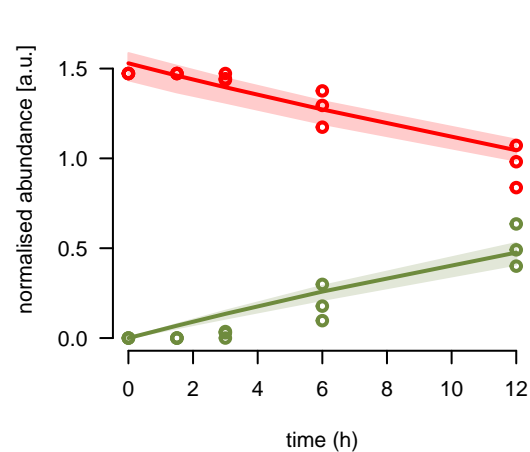**abundances**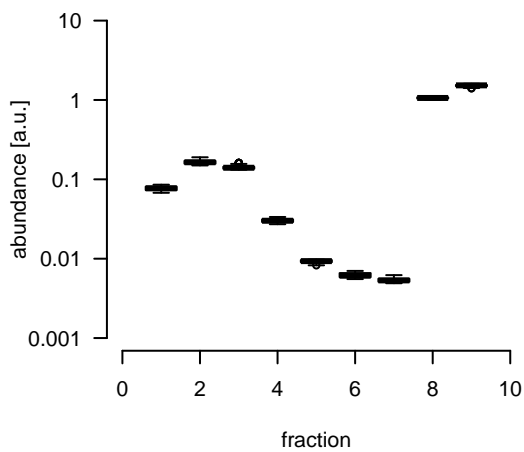**fluxes**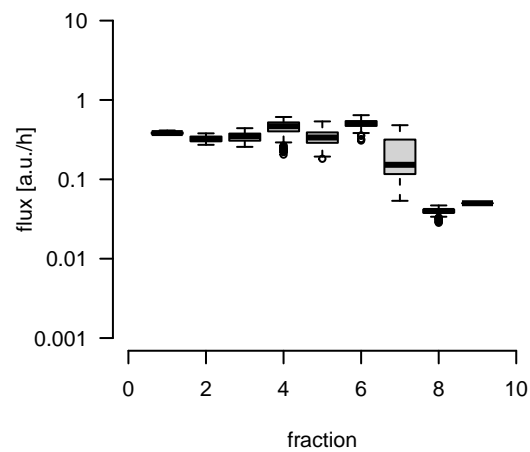

**mL51 fraction: 1****fraction: 2****fraction: 3****fraction: 4****fraction: 5****fraction: 6****fraction: 7****fraction: 8**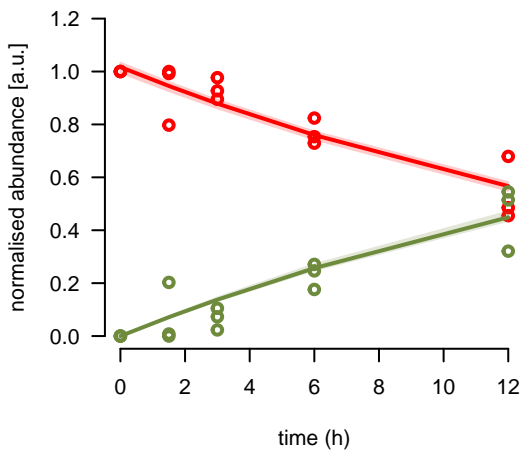**fraction: 9**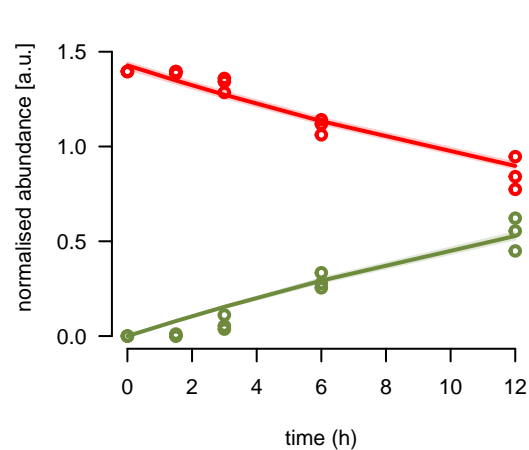**abundances**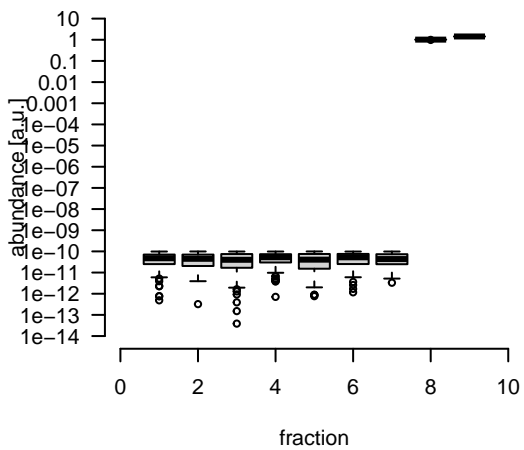**fluxes**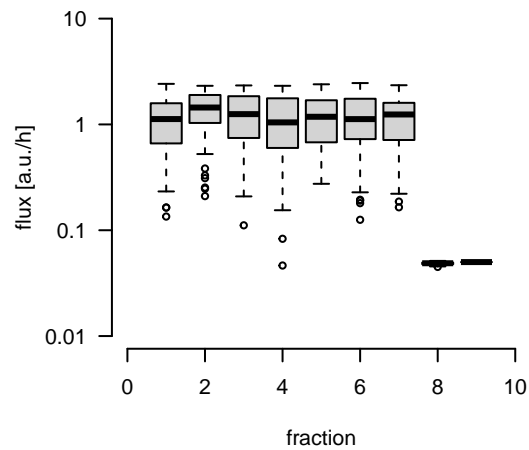

**mL52 fraction: 1****fraction: 2****fraction: 3****fraction: 4****fraction: 5****fraction: 6****fraction: 7****fraction: 8**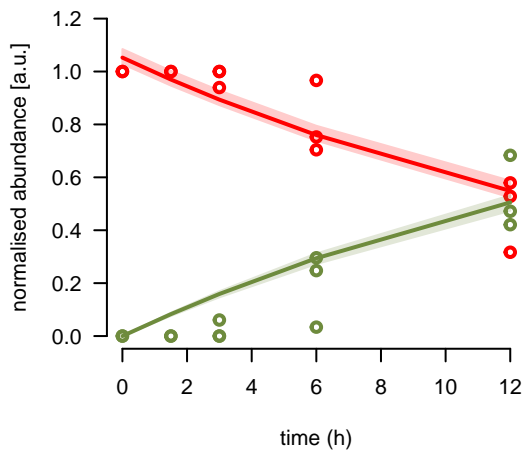**fraction: 9**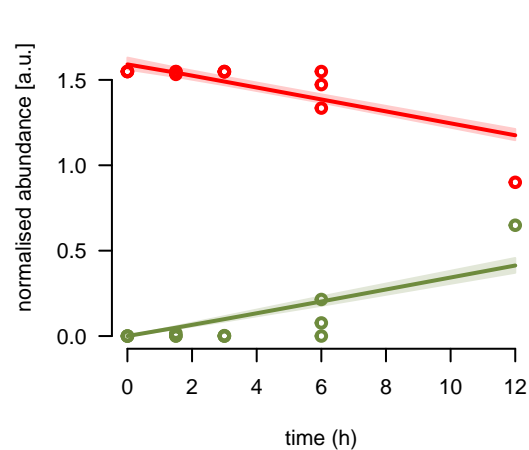**abundances**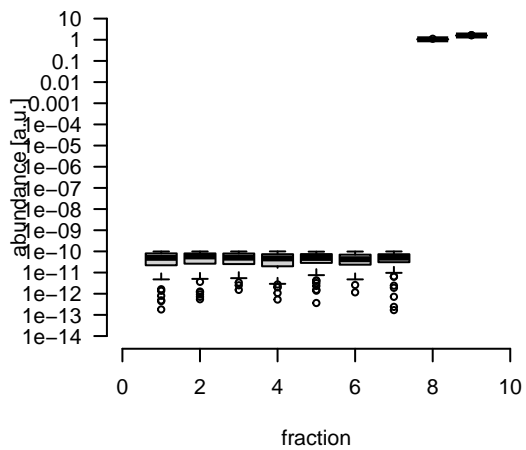**fluxes**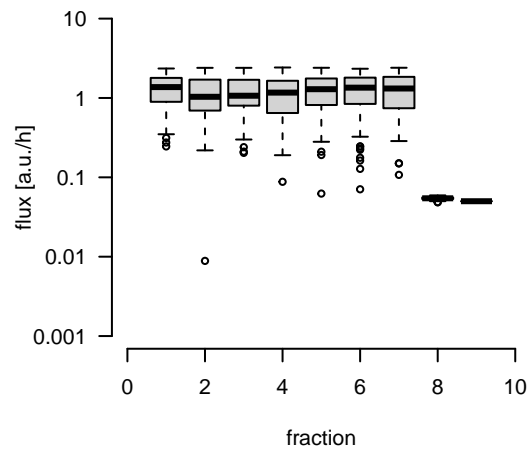

**mL53 fraction: 1**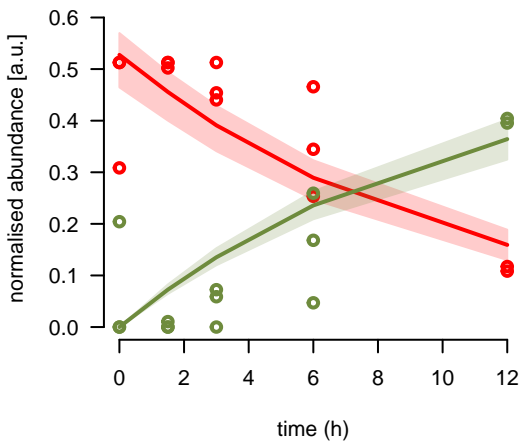**fraction: 2**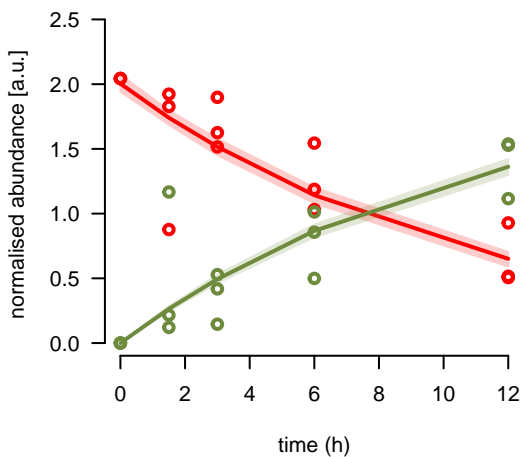**fraction: 3**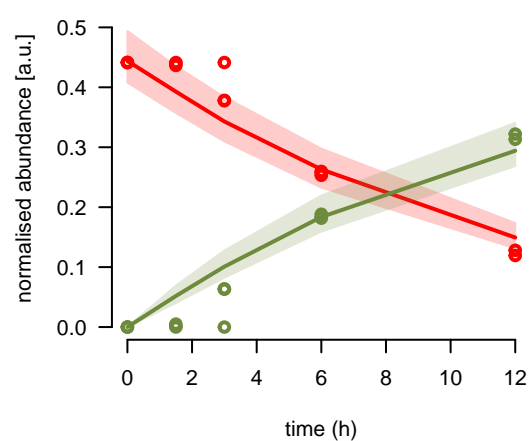**fraction: 4**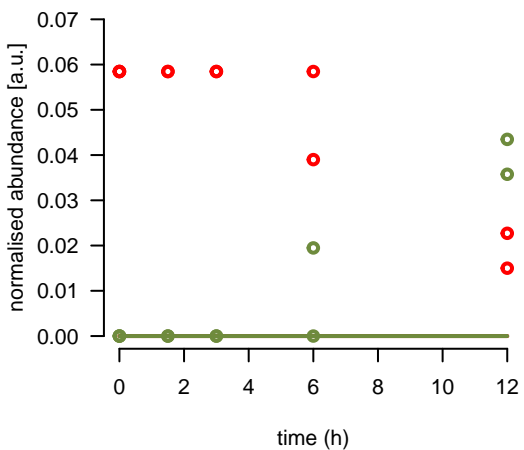**fraction: 5**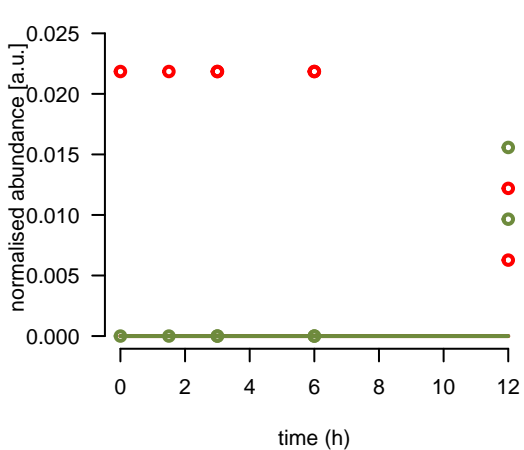**fraction: 6**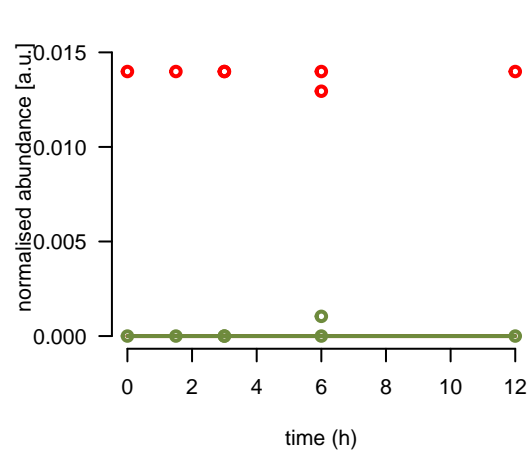**fraction: 7**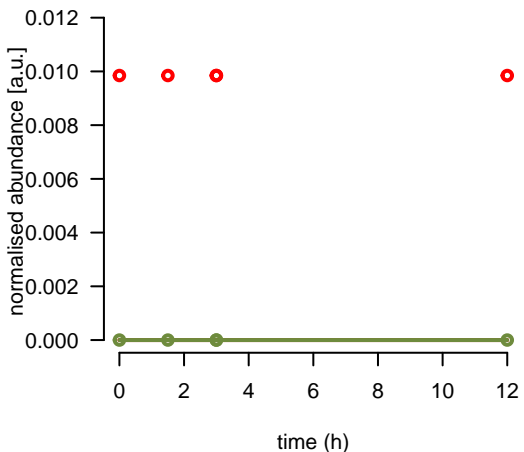**fraction: 8**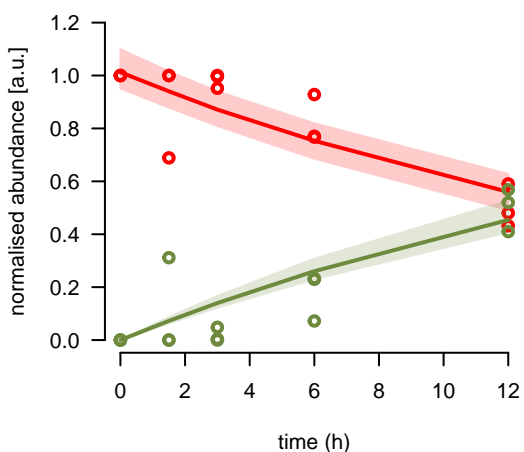**fraction: 9**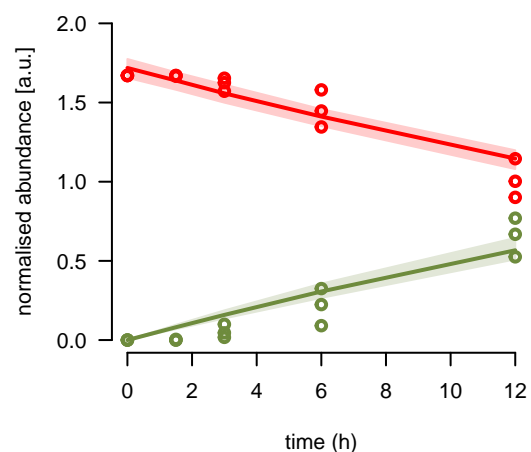**abundances**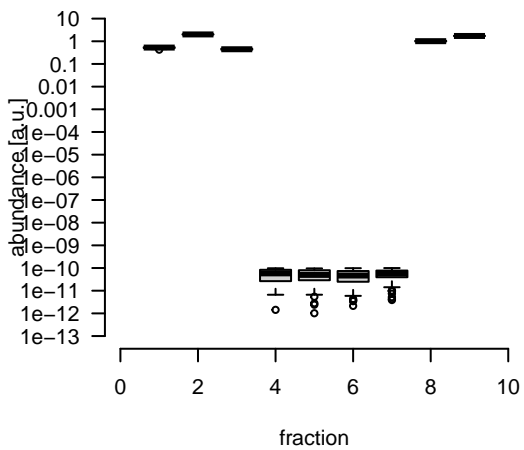**fluxes**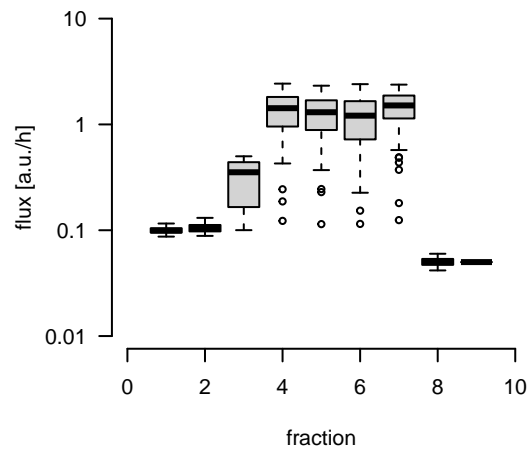

**mL54 fraction: 1**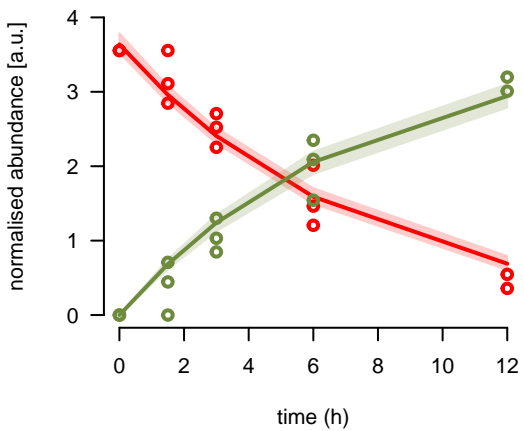**fraction: 2**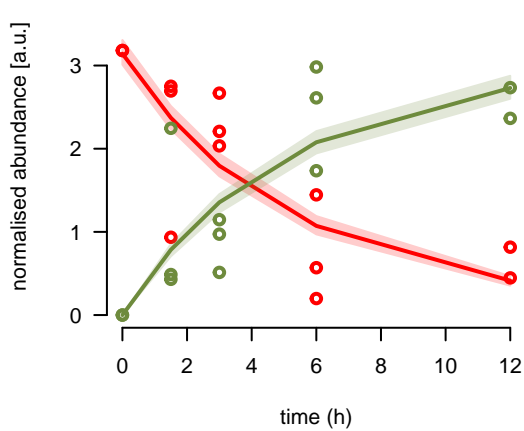**fraction: 3**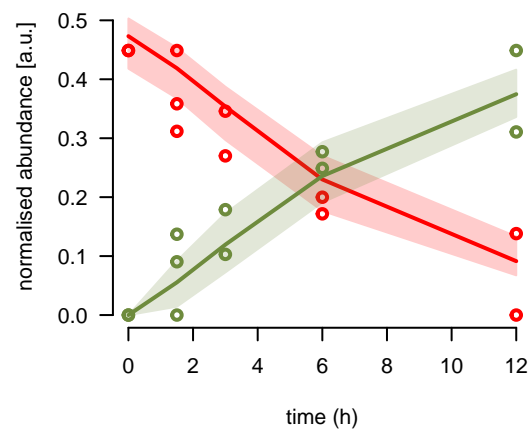**fraction: 4**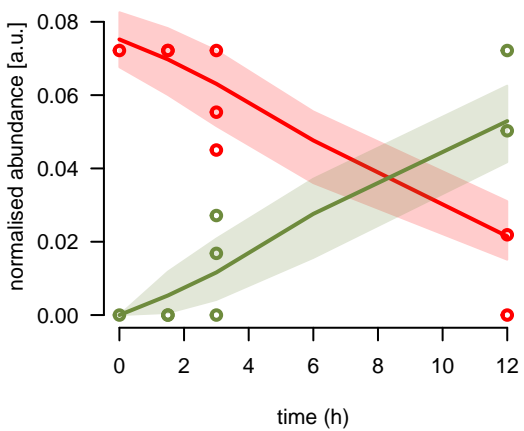**fraction: 5**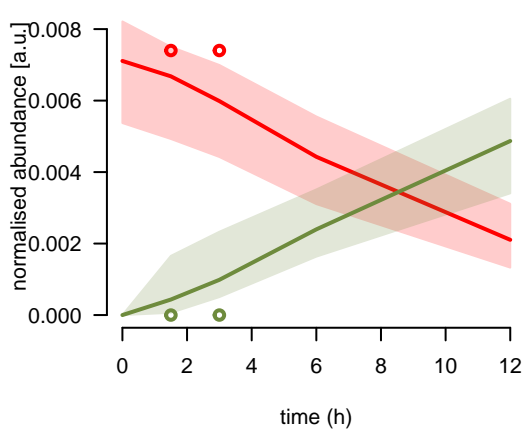**fraction: 6**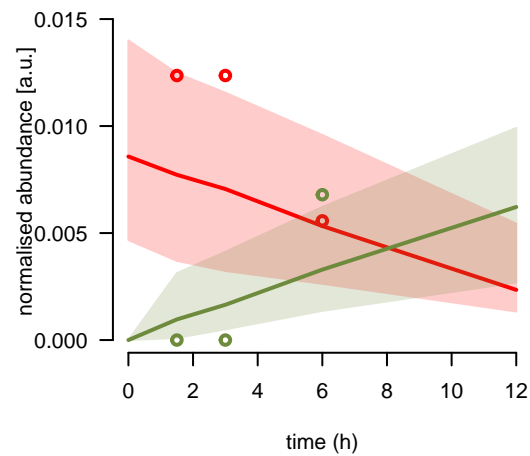**fraction: 7**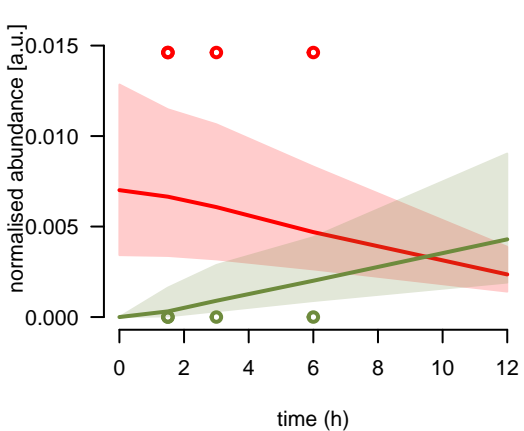**fraction: 8**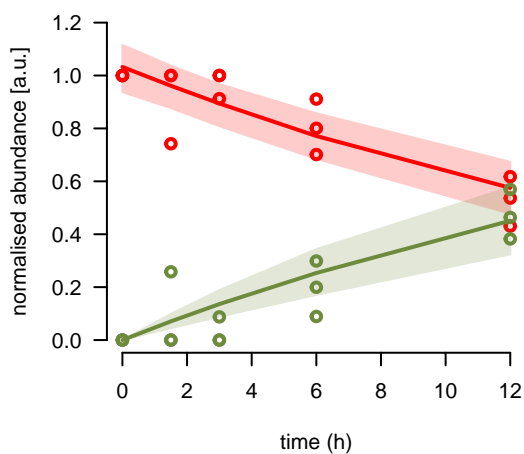**fraction: 9**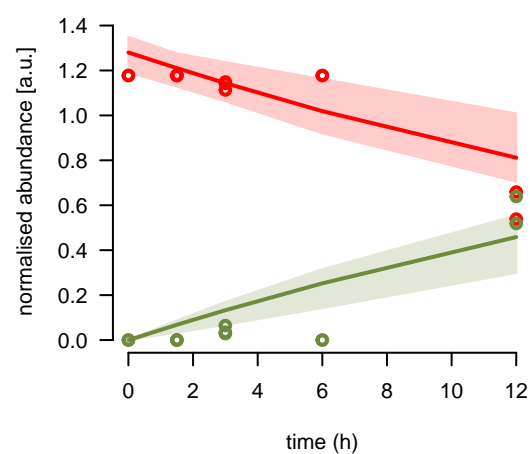**abundances**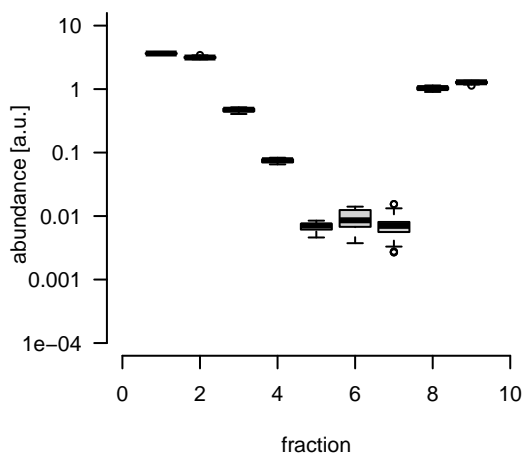**fluxes**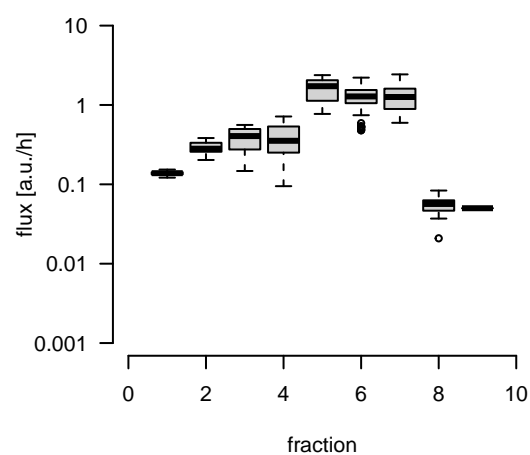

**mL62 fraction: 1**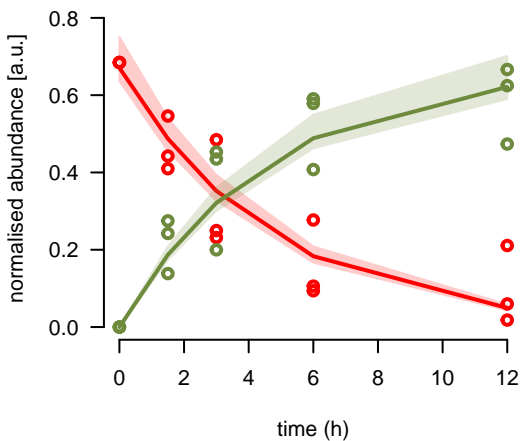**fraction: 2**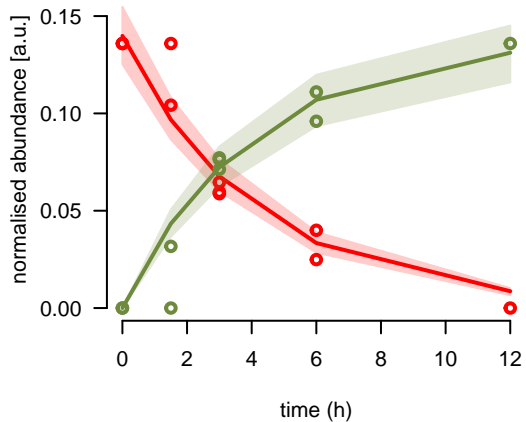**fraction: 3**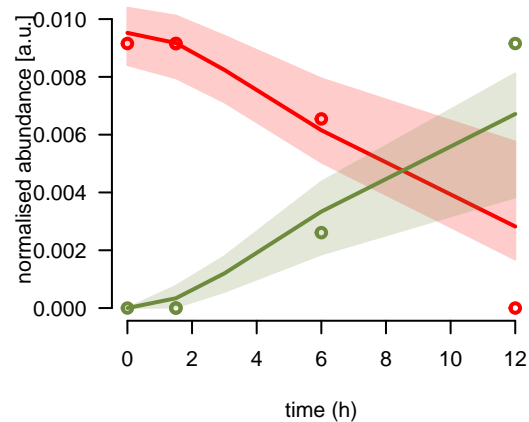**fraction: 4****fraction: 5**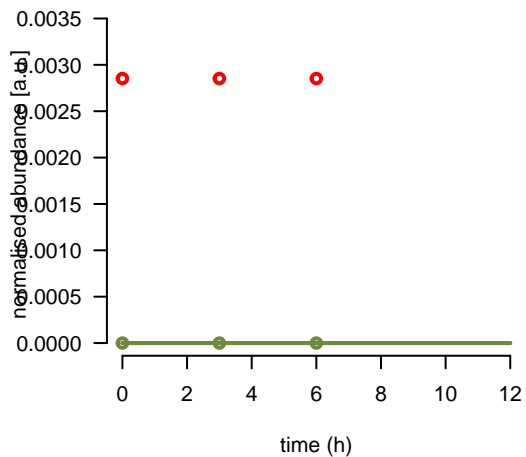**fraction: 6**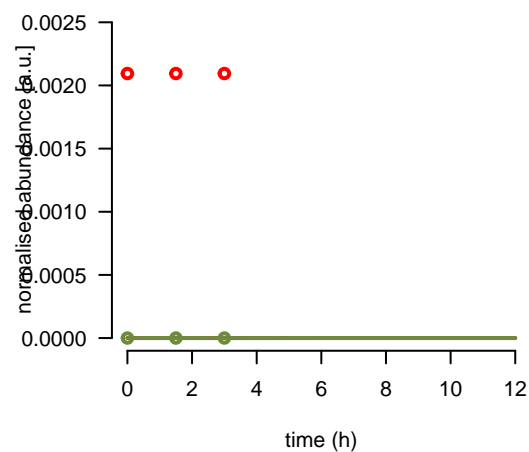**fraction: 7**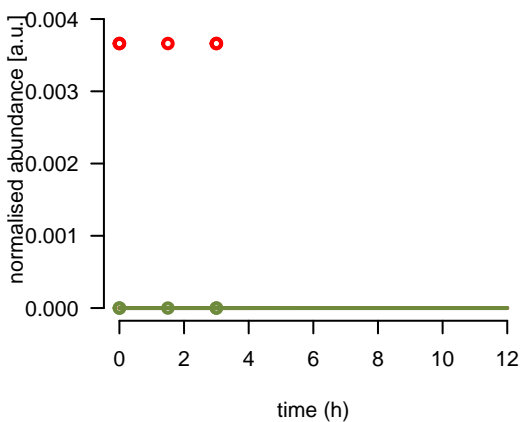**fraction: 8**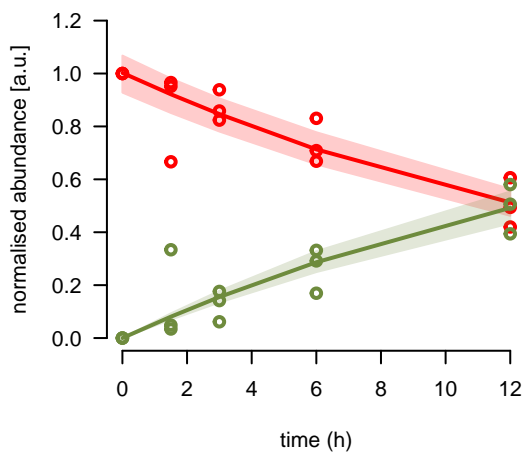**fraction: 9**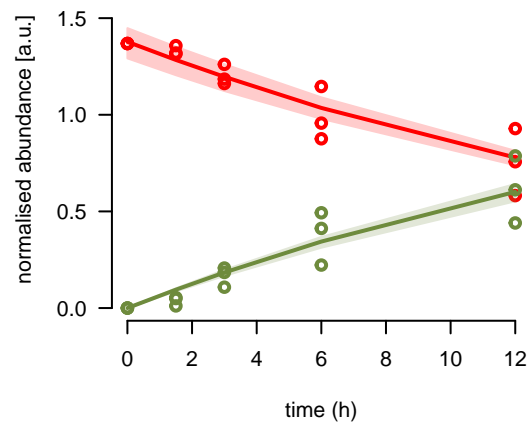**abundances**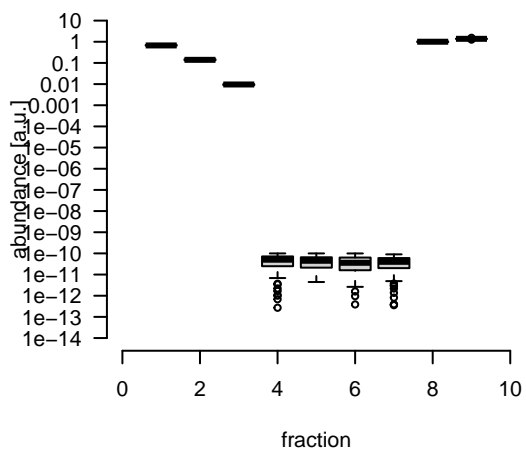**fluxes**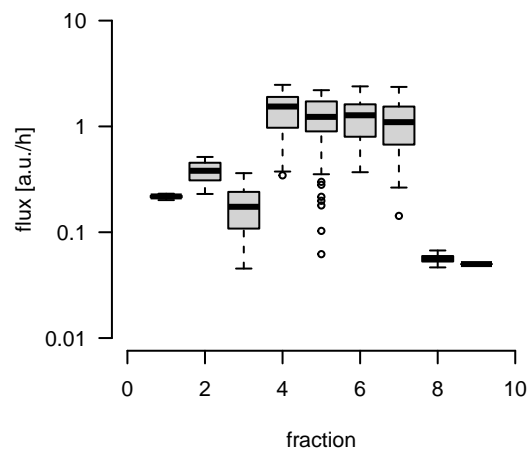



**mL63 fraction: 1****fraction: 2****fraction: 3****fraction: 4****fraction: 5****fraction: 6**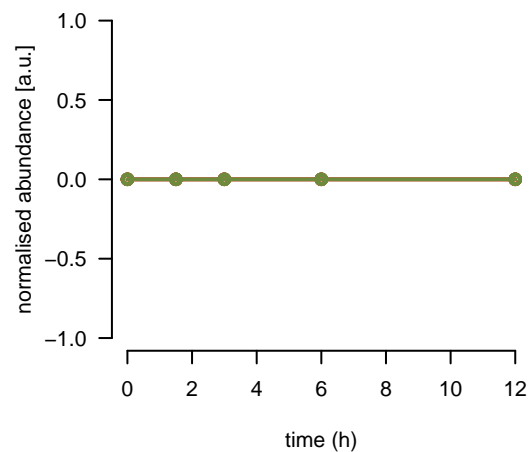**fraction: 7**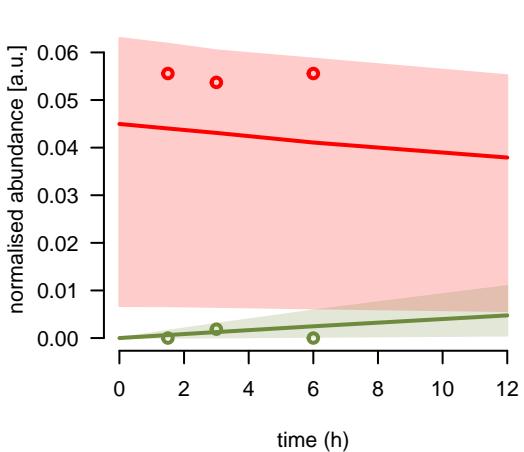**fraction: 8**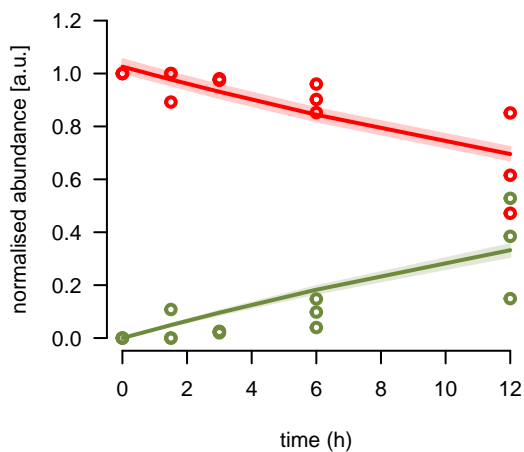**fraction: 9**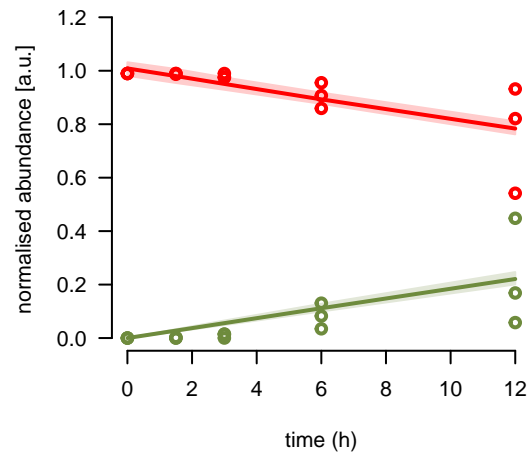**abundances**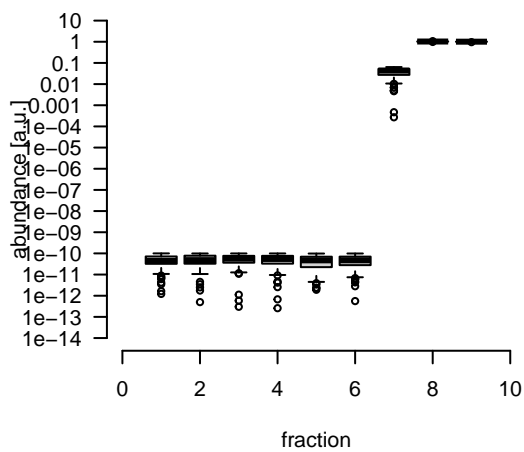**fluxes**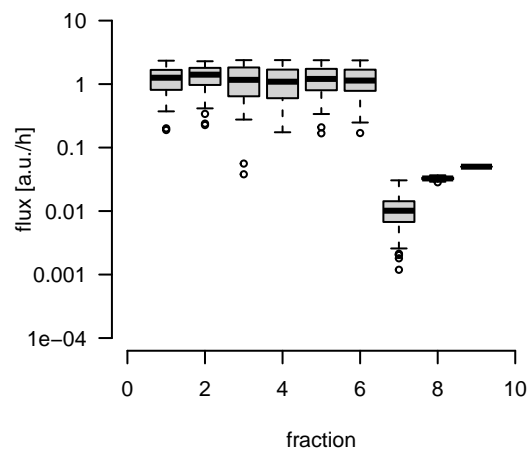

**mL64 fraction: 1****fraction: 2**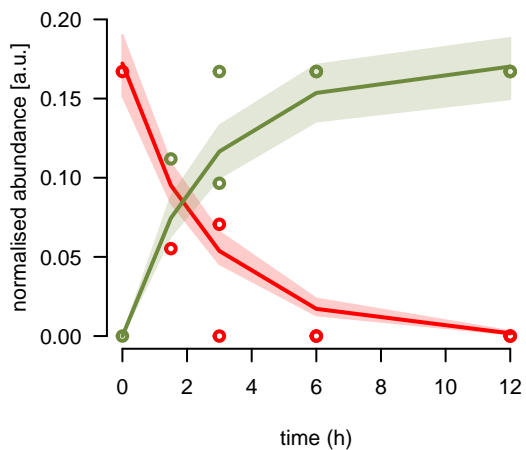**fraction: 3**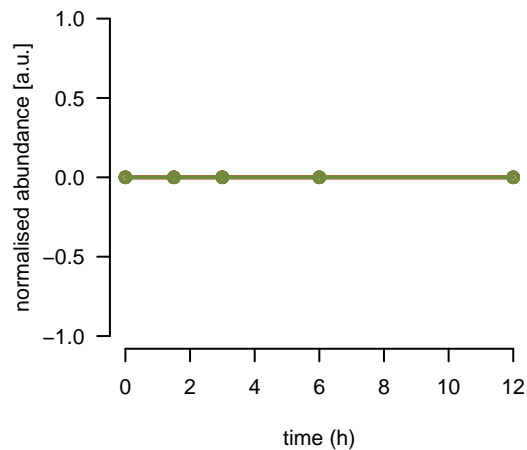**fraction: 4****fraction: 5**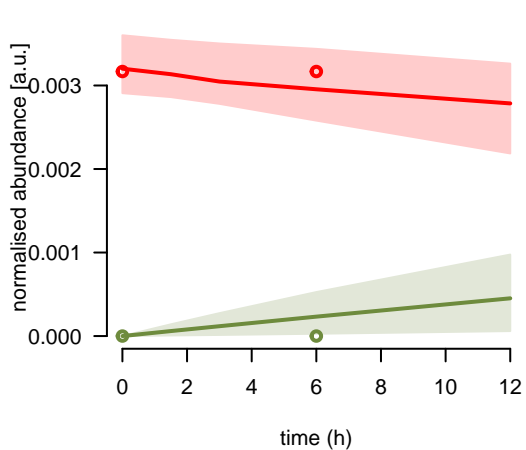**fraction: 6****fraction: 7****fraction: 8**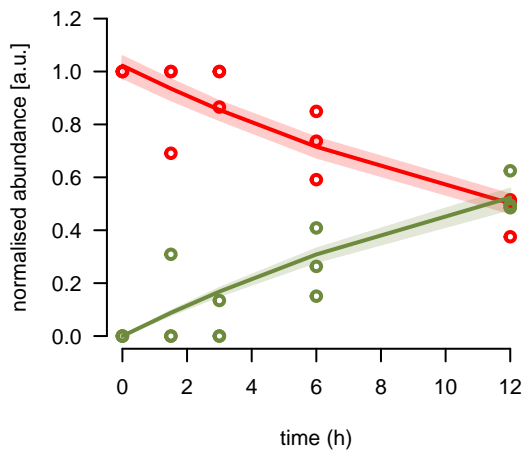**fraction: 9**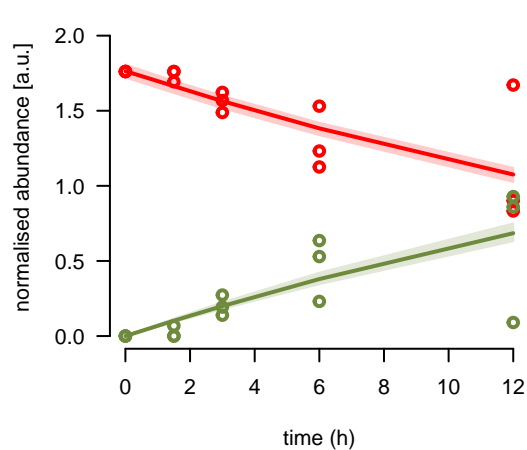**abundances**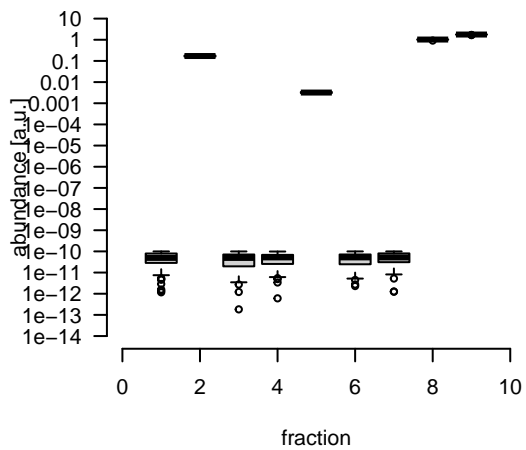**fluxes**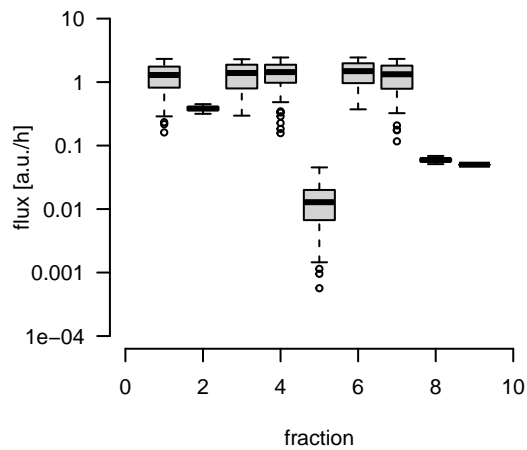

**mL65 fraction: 1**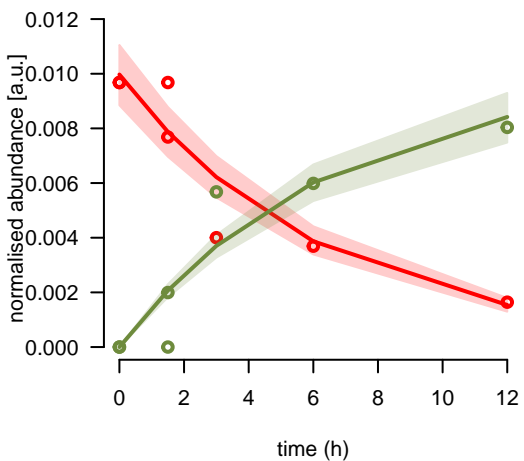**fraction: 2**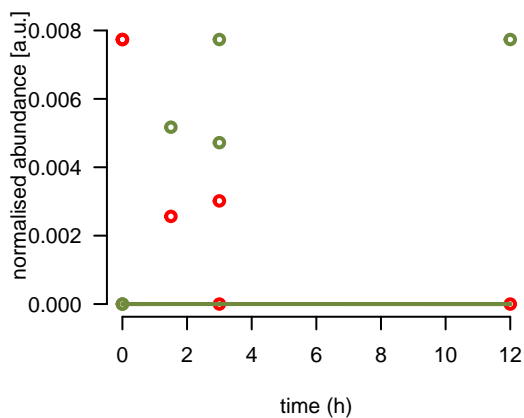**fraction: 3****fraction: 4**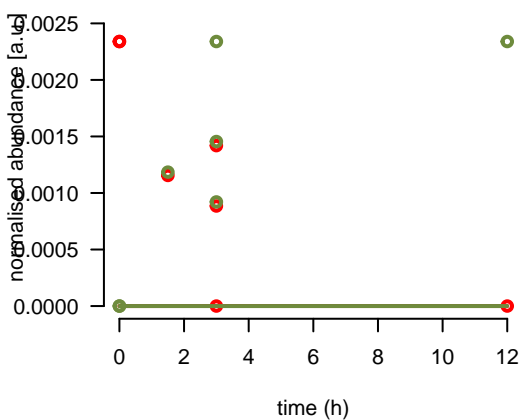**fraction: 5**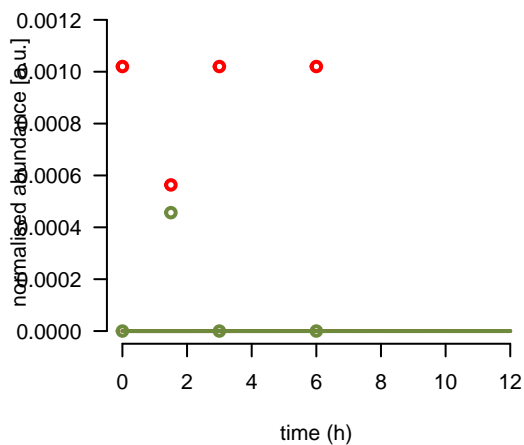**fraction: 6**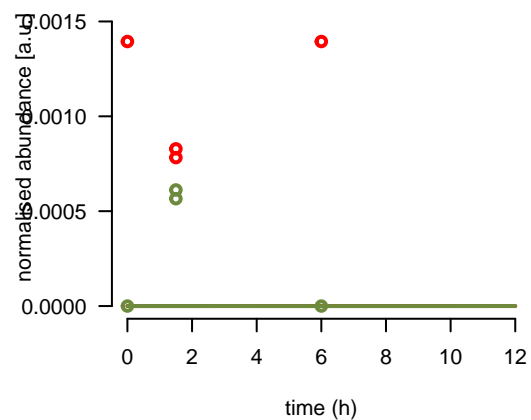**fraction: 7**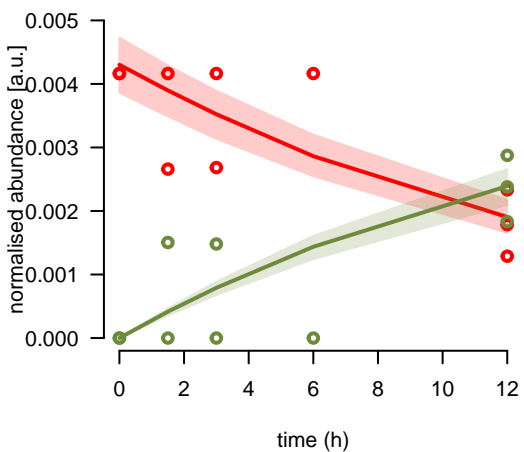**fraction: 8**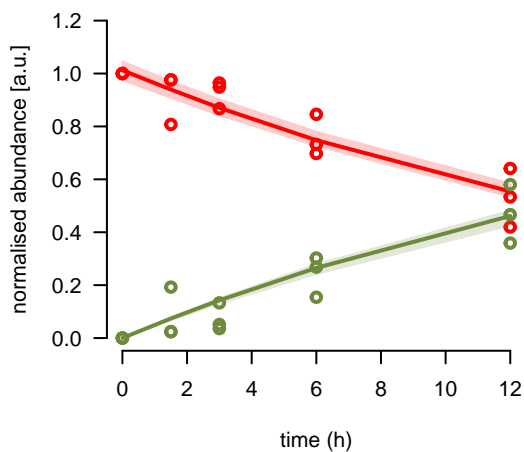**fraction: 9**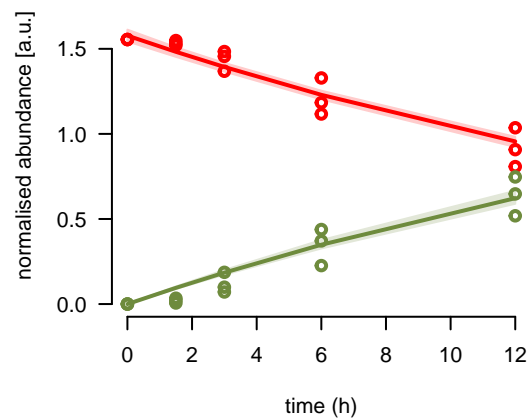**abundances**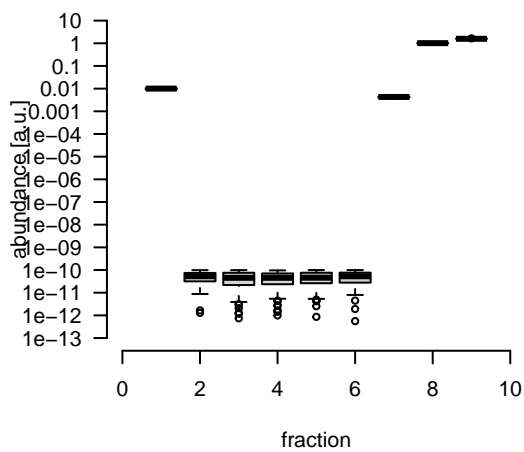**fluxes**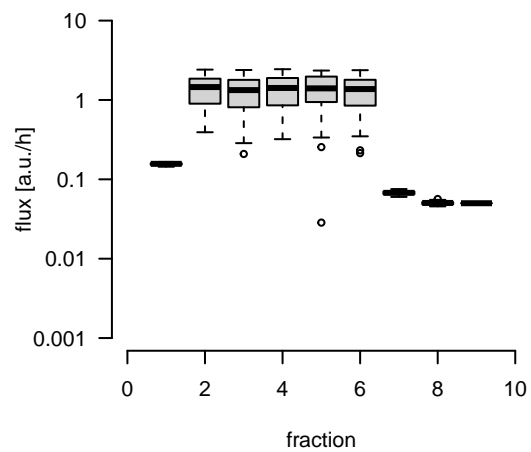

**mL66 fraction: 1****fraction: 2****fraction: 3**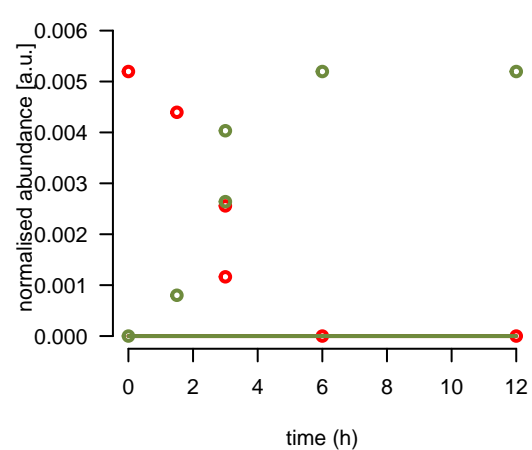**fraction: 4**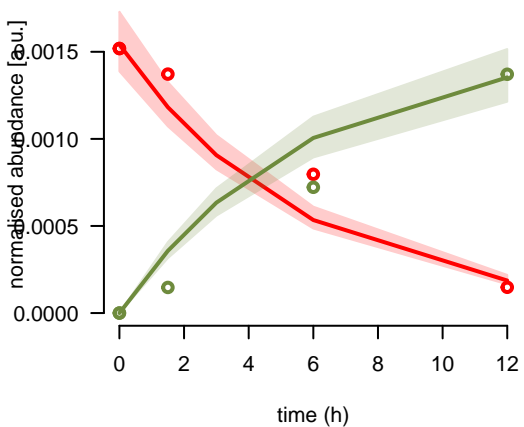**fraction: 5**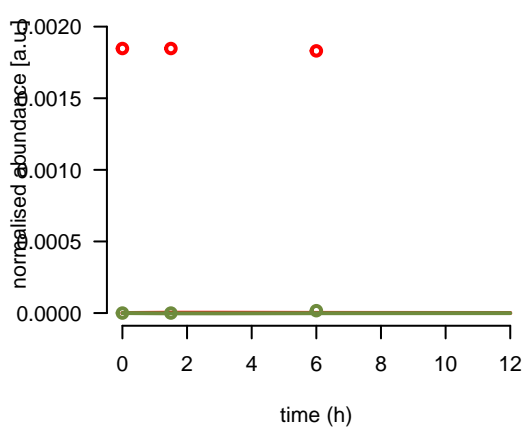**fraction: 6**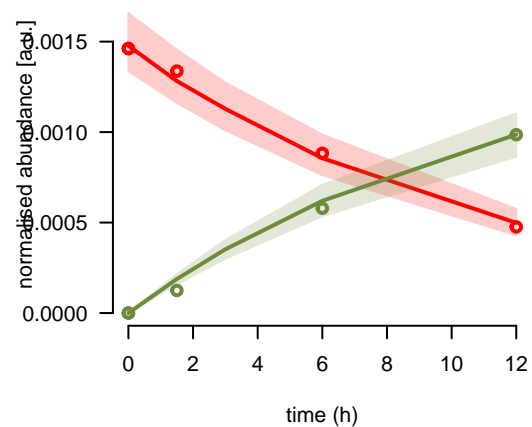**fraction: 7**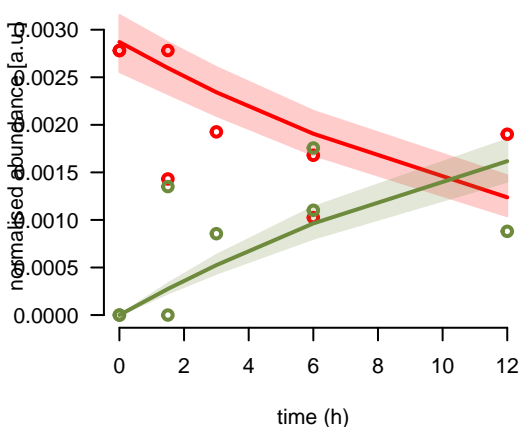**fraction: 8**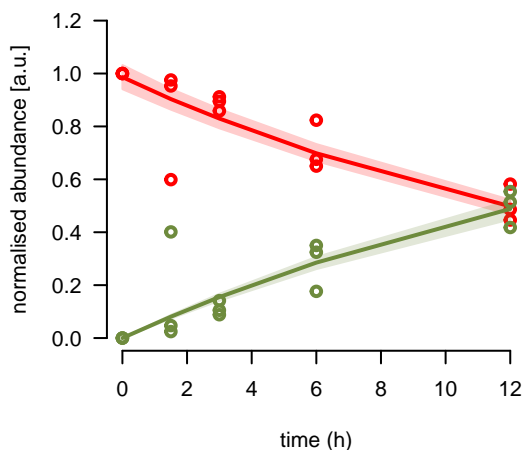**fraction: 9**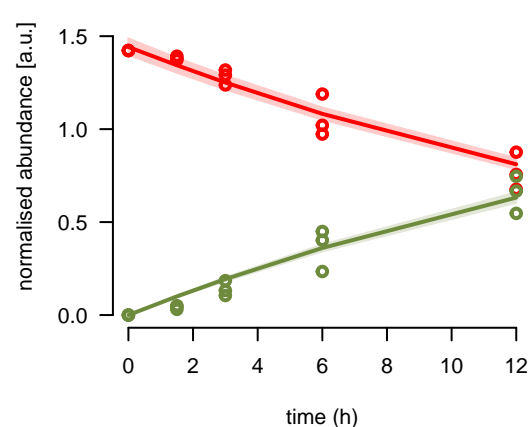**abundances**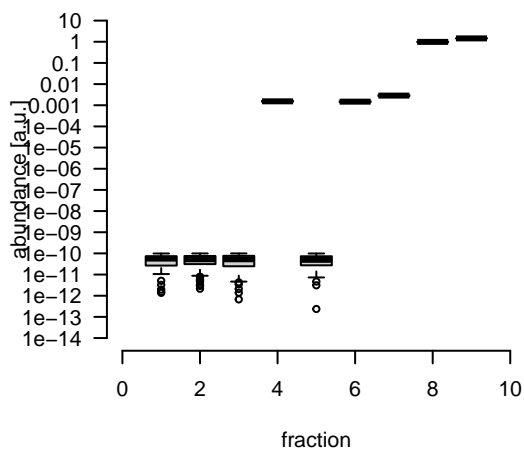**fluxes**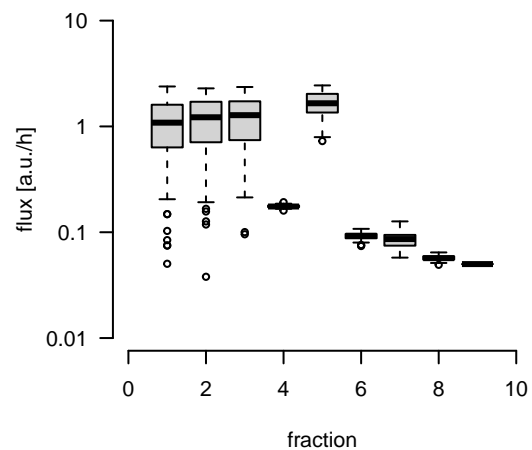

Supplement: 41594_2024_1356_MOESM10_ESM.pdf [file 41594_2024_1356_MOESM10_ESM.pdf]
