# Supplementary material for: A roadmap for ribosome assembly in human mitochondria
Source: PubMed Central journal article supplement (PMC11638073; doi:10.1038/s41594-024-01356-w), 2024-07-11

### bS6m

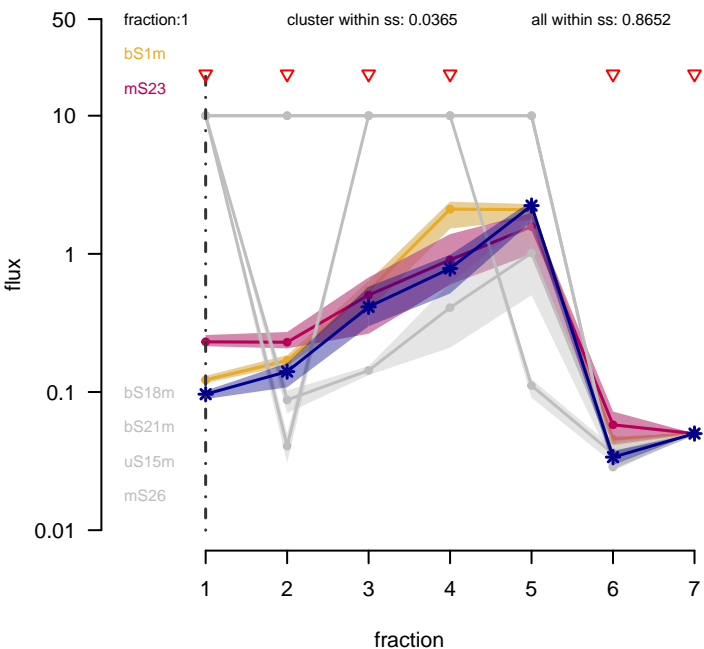

### bS6m

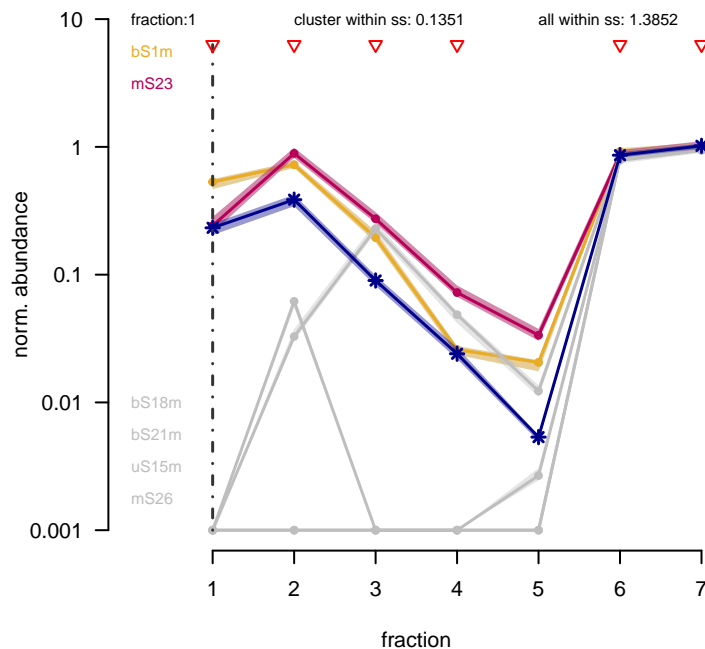

### bS1m

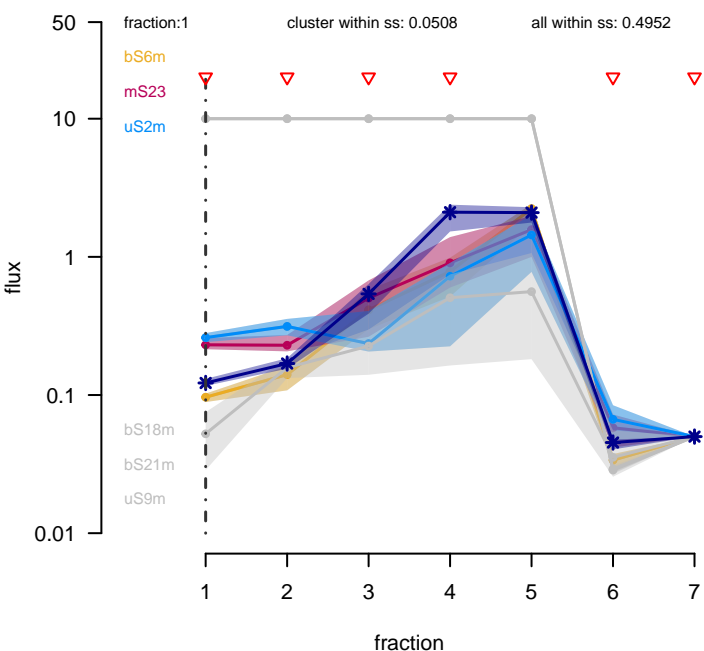

### bS1m

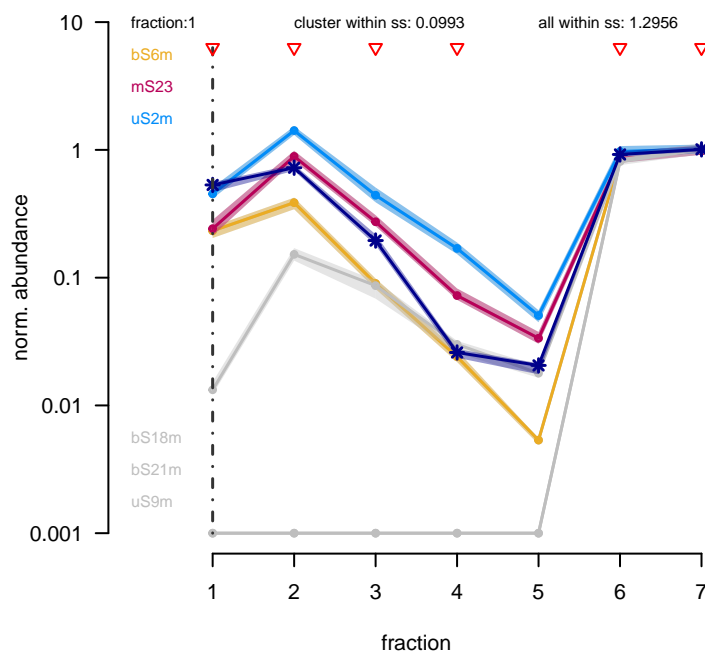

### mS23

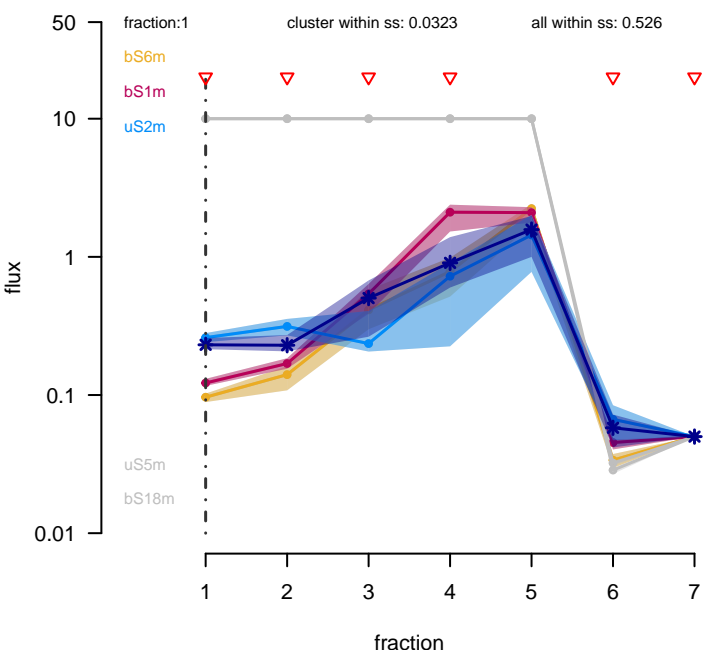

### mS23

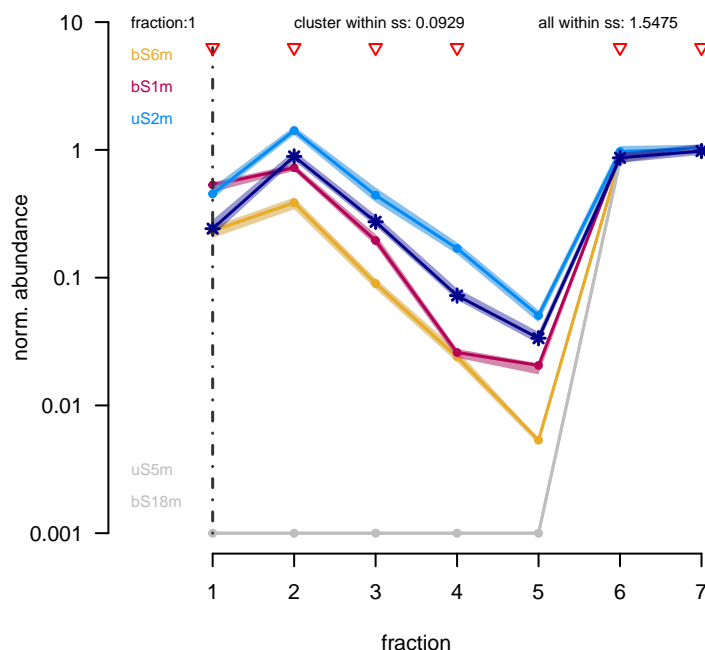

### uS2m

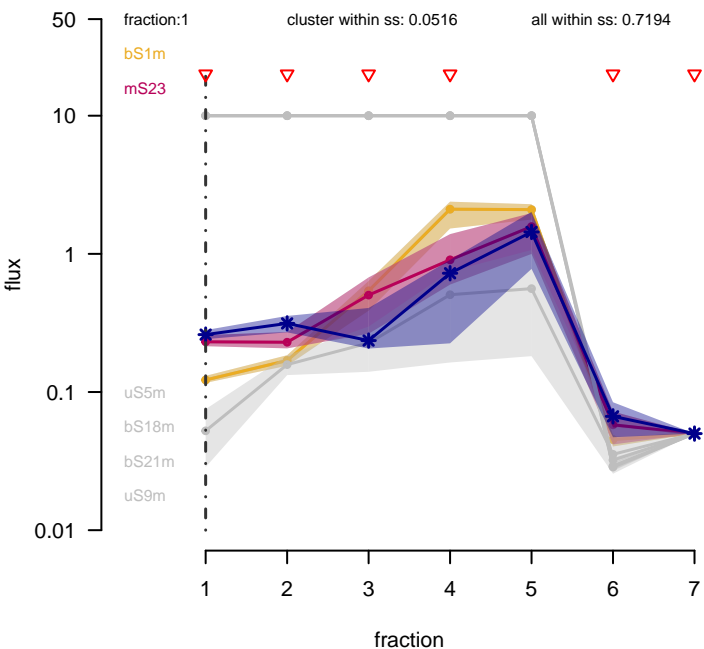

### uS2m

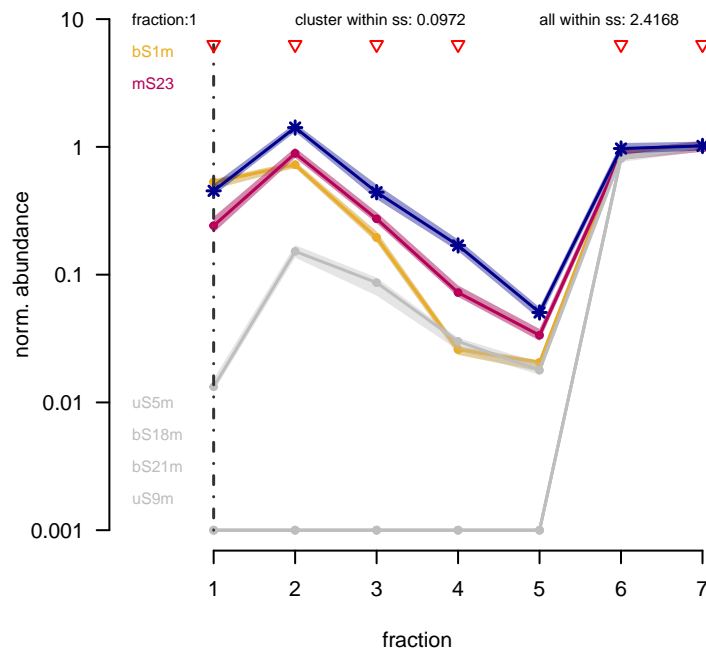

### uS9m

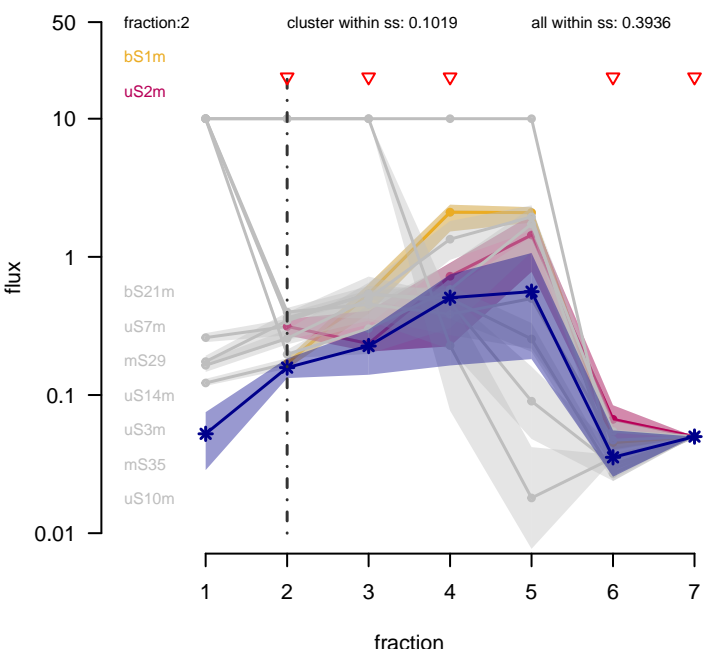

### uS9m

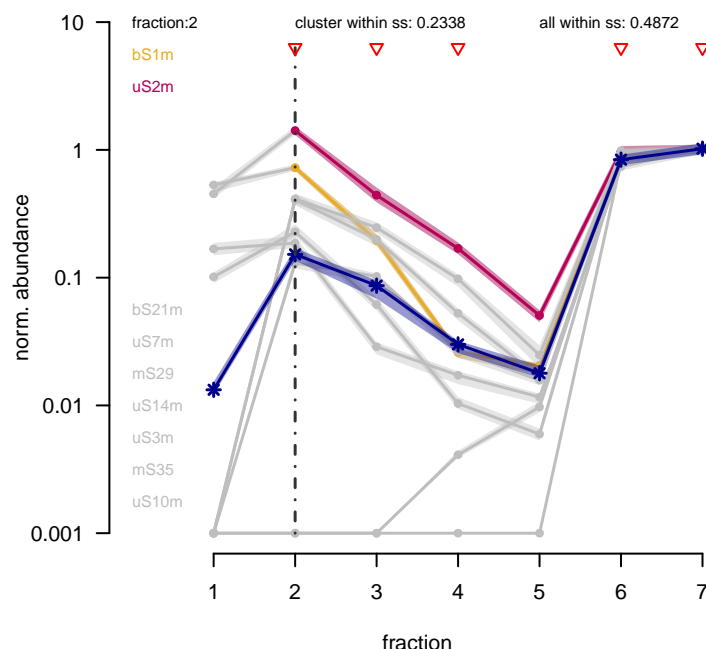

### uS10m

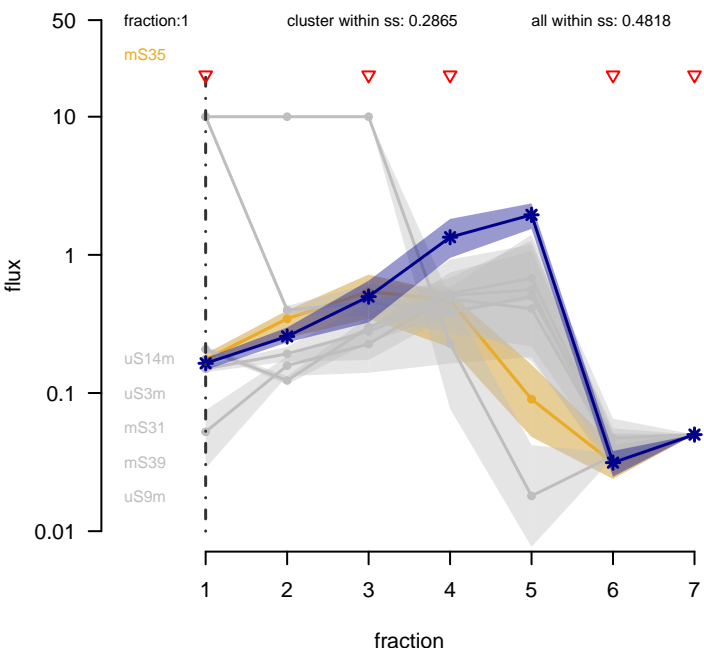

### uS10m

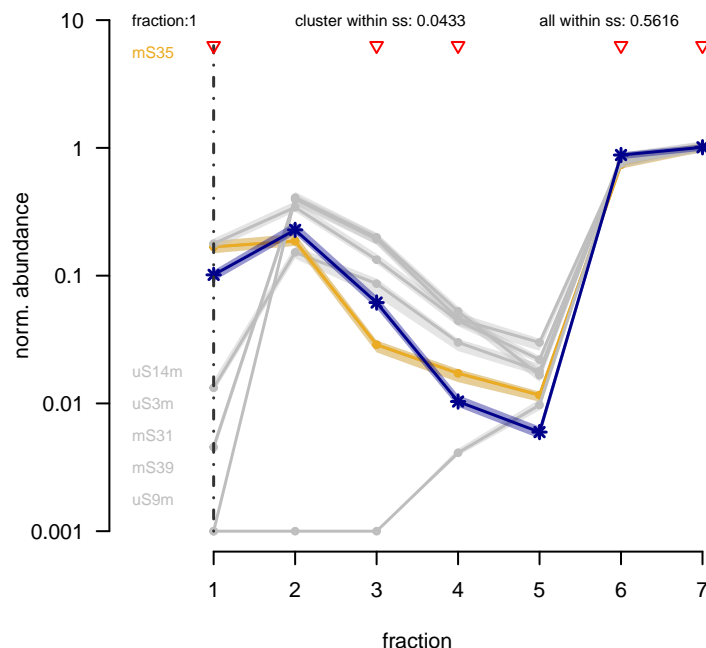

**mS35**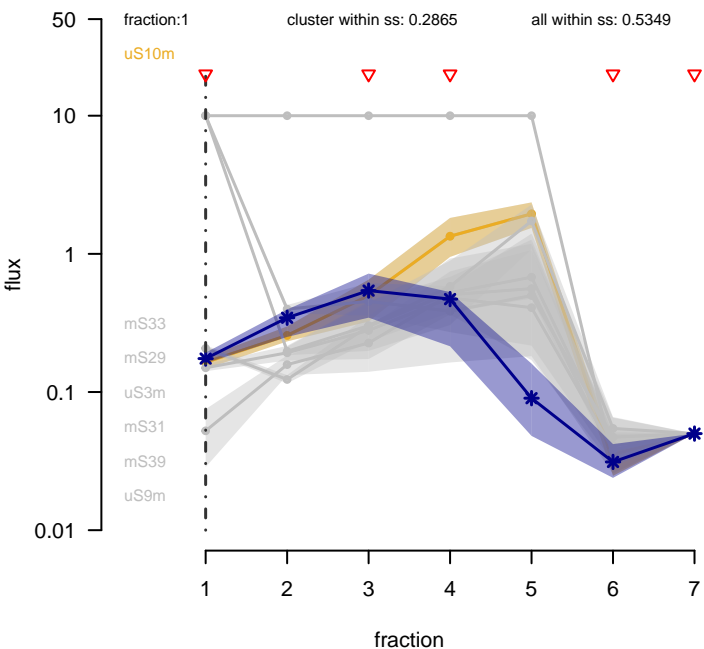**mS35**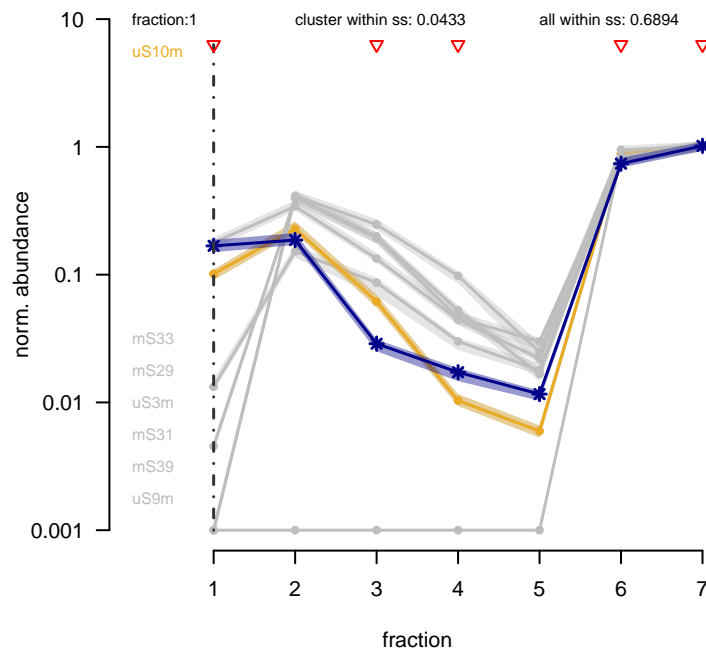**mS22**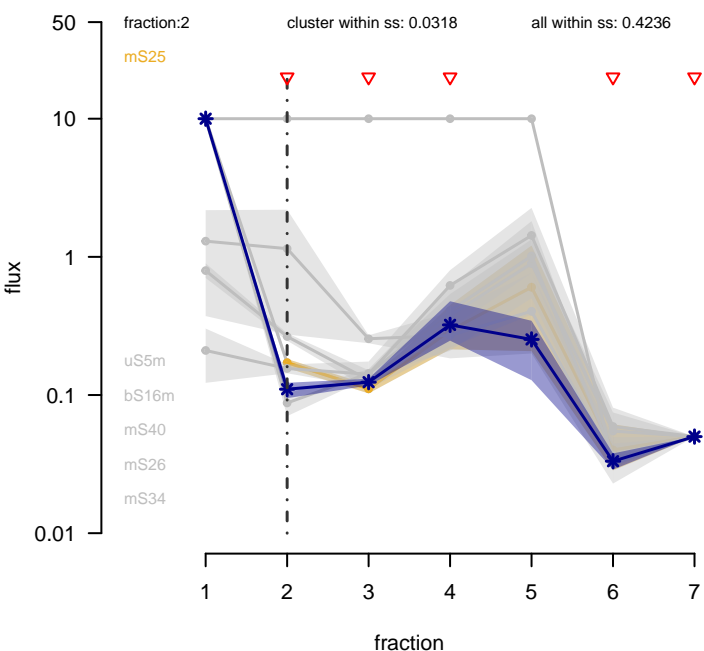**mS22**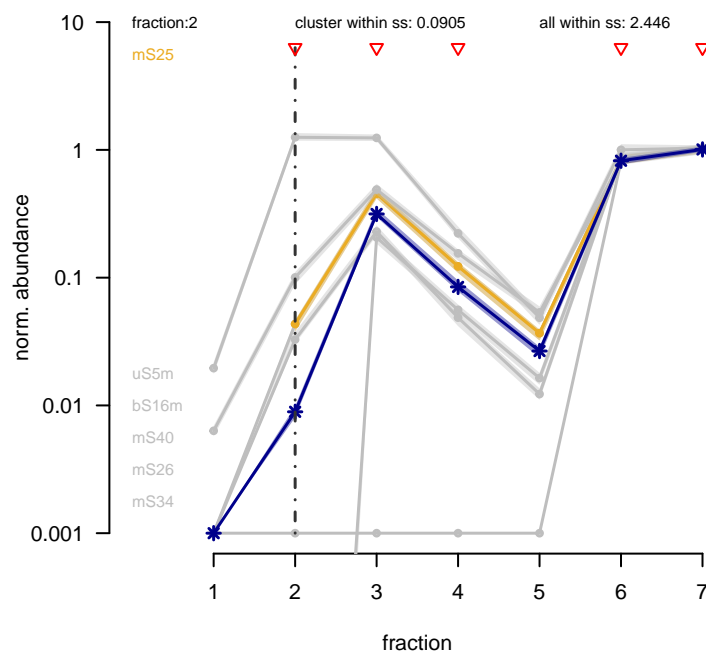**mS25**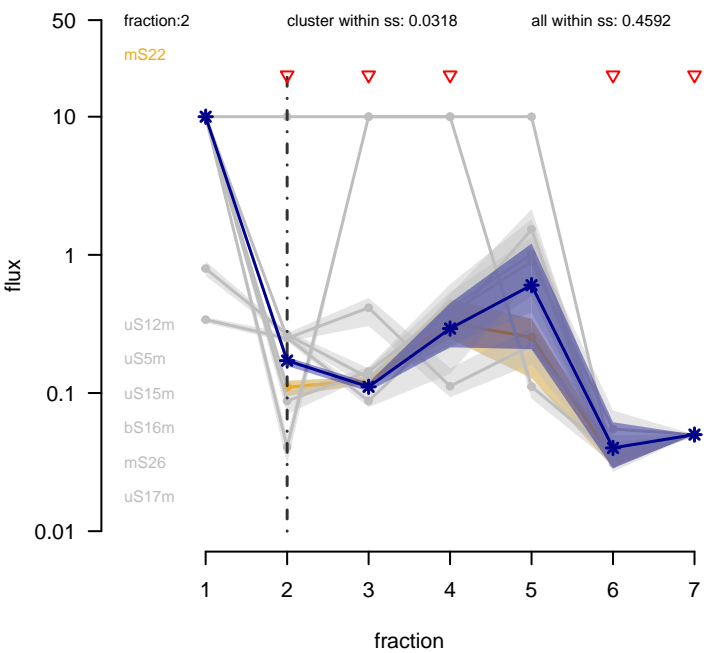**mS25**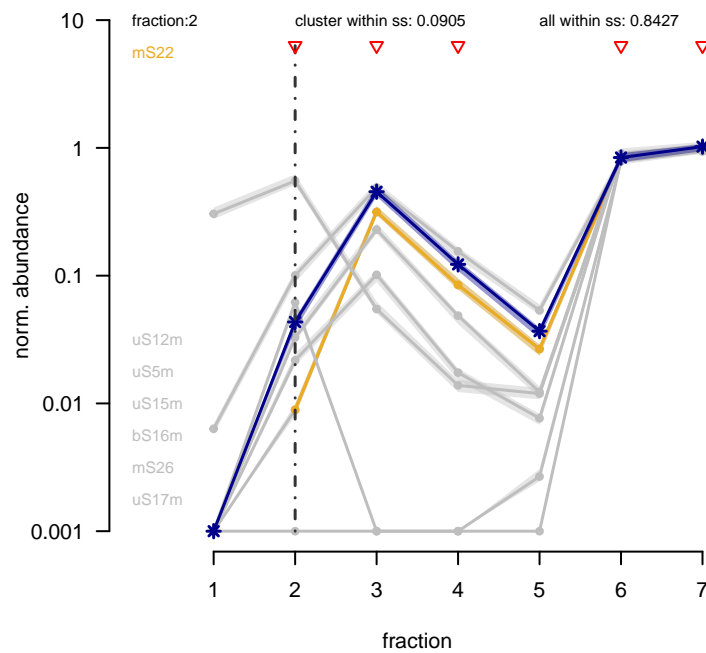

**mS27**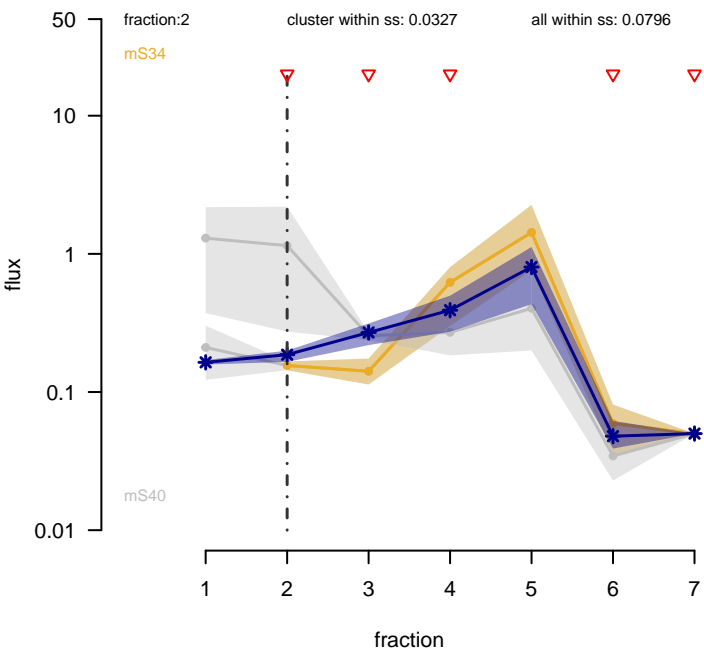**mS27**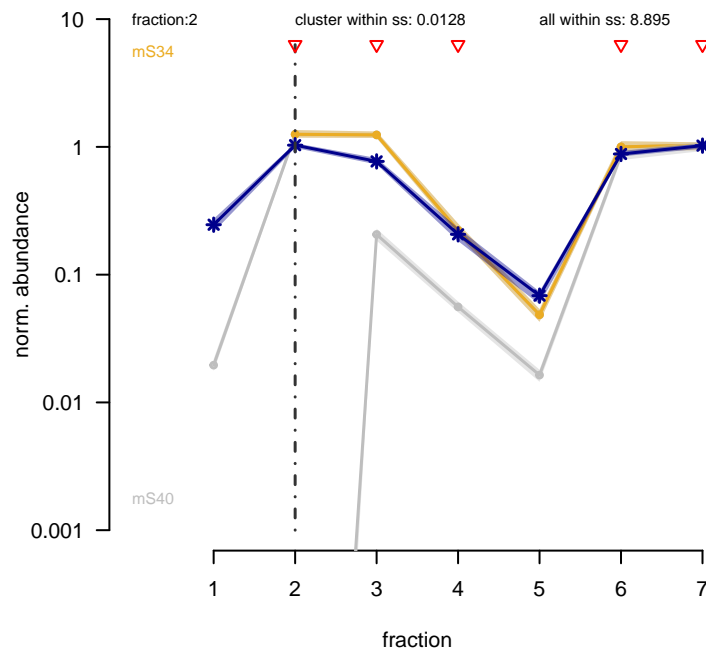**mS34**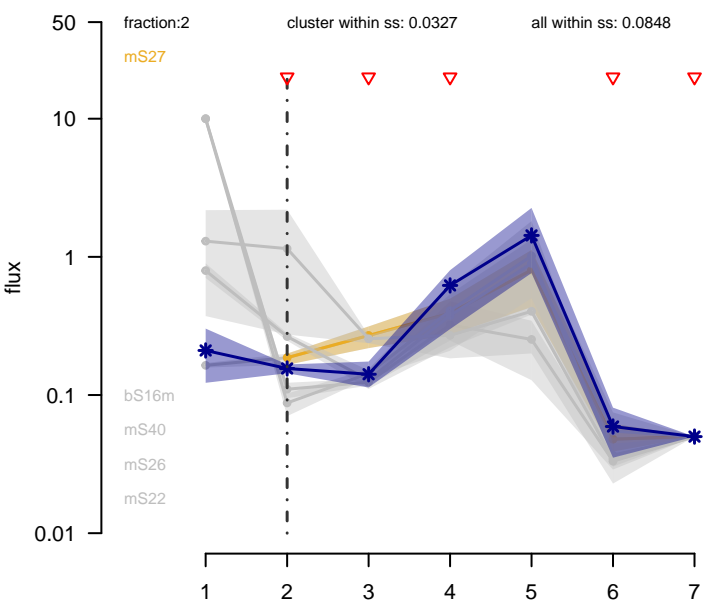**mS34**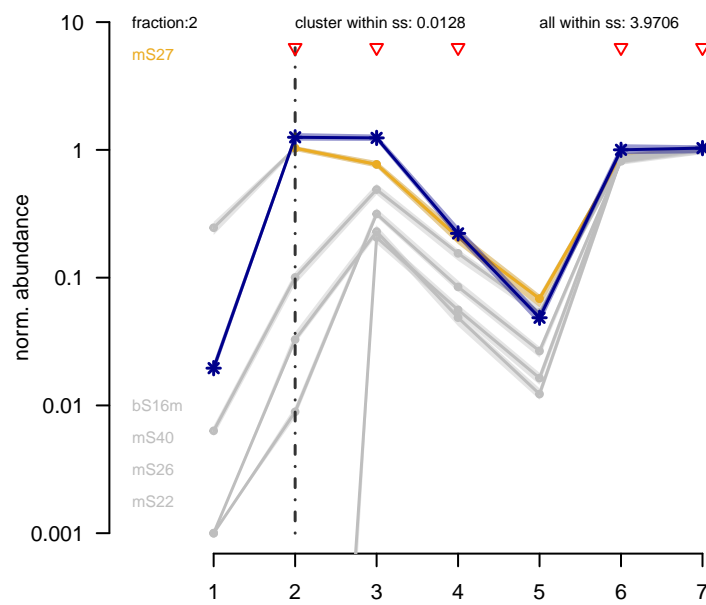**uS17m**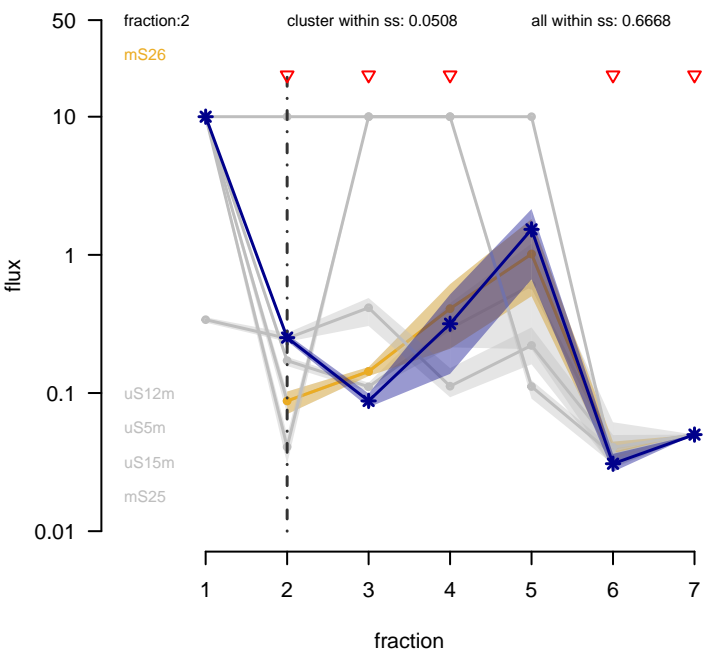**uS17m**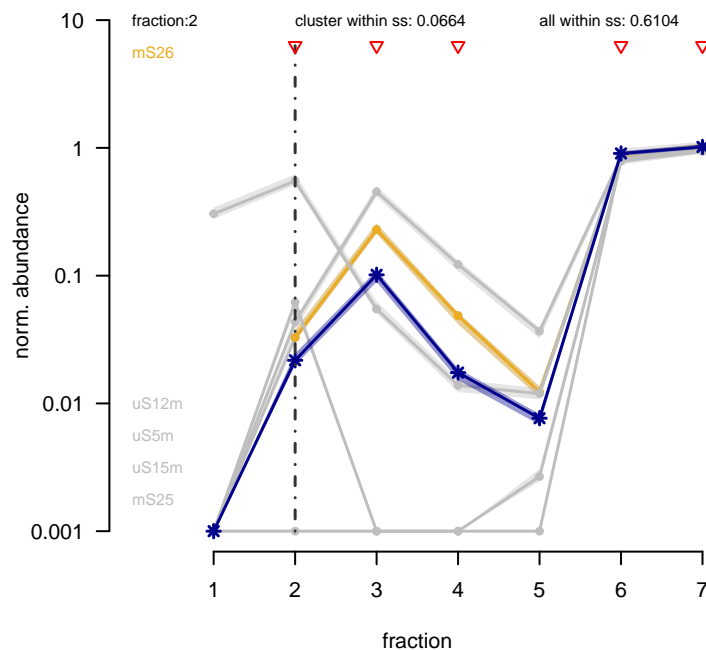

**mS26**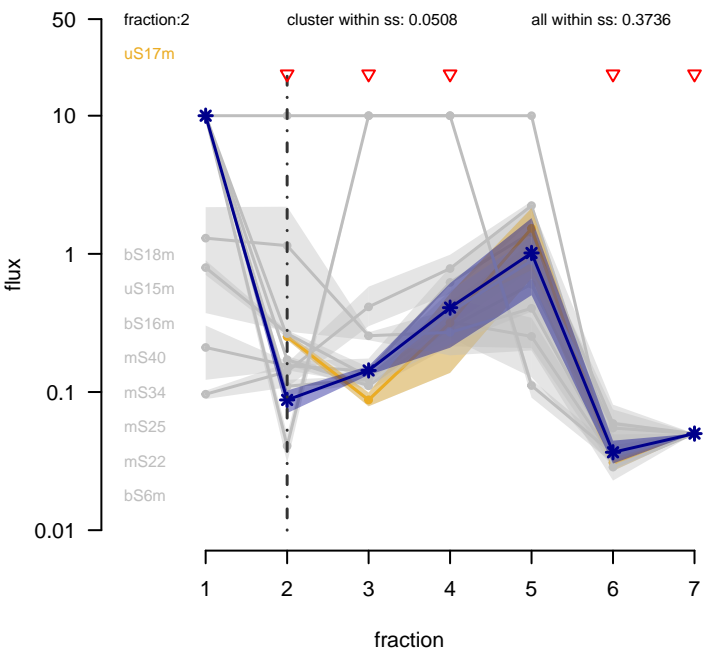**mS26**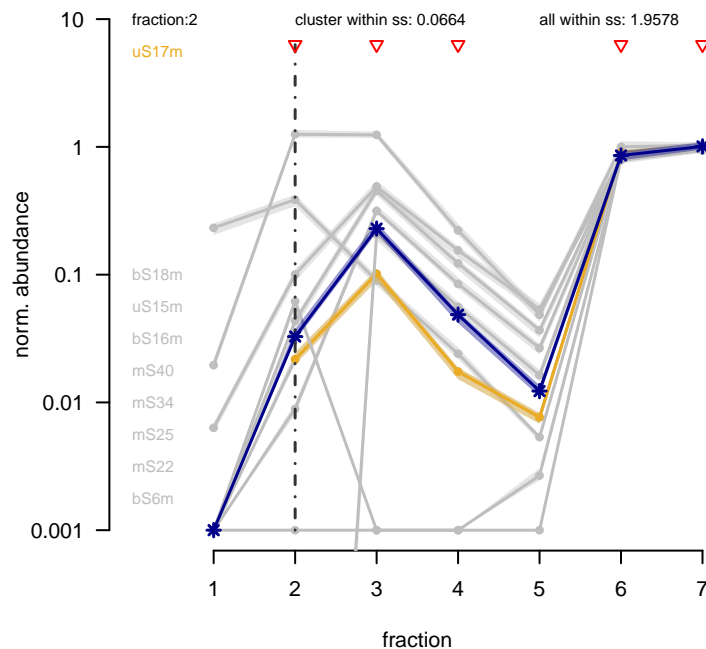**mS40**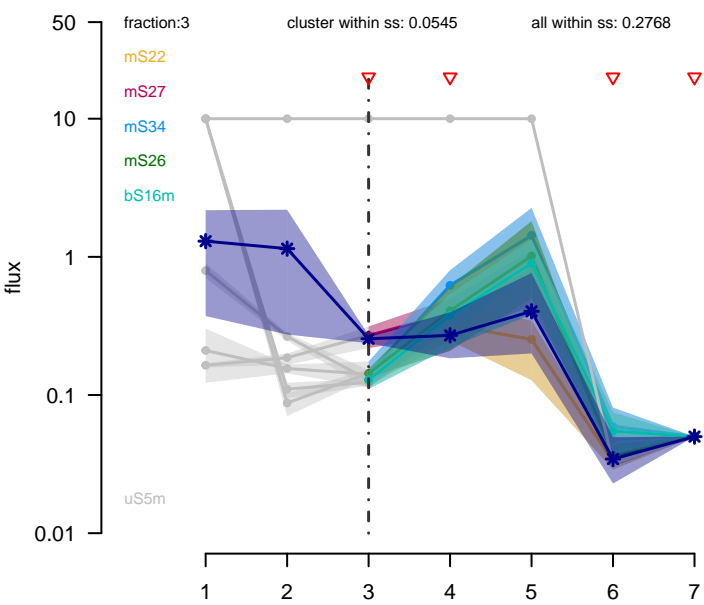**mS40**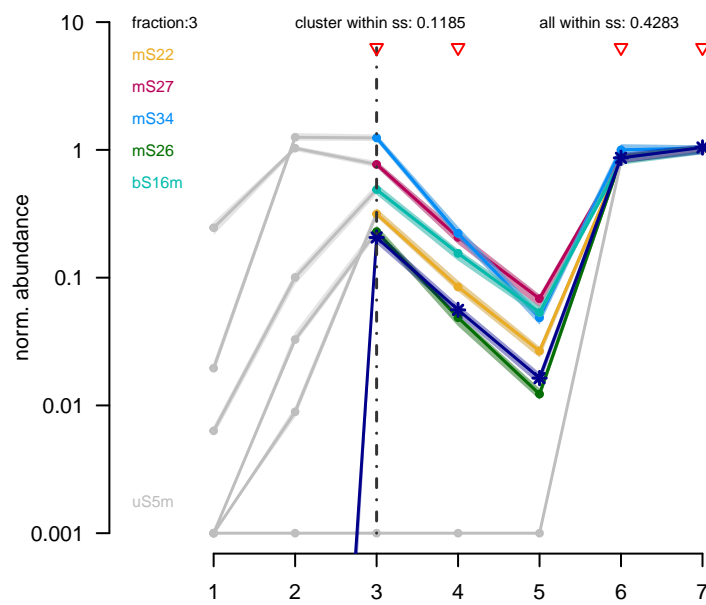**bS16m**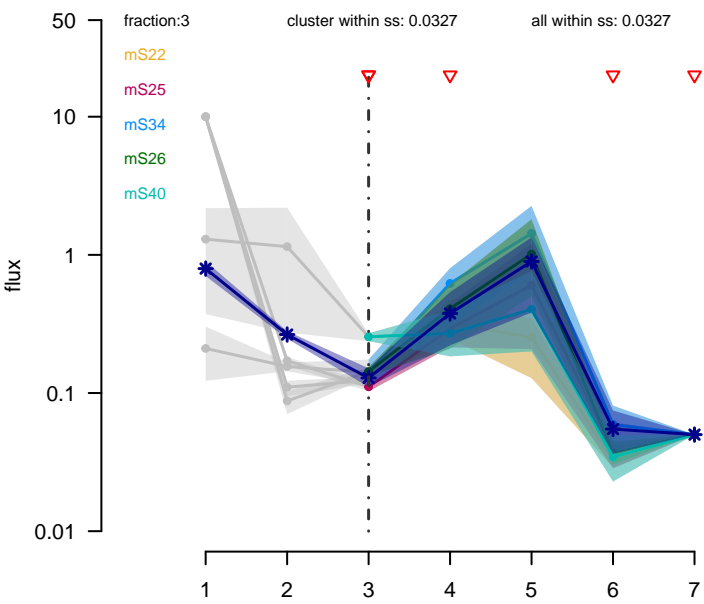**bS16m**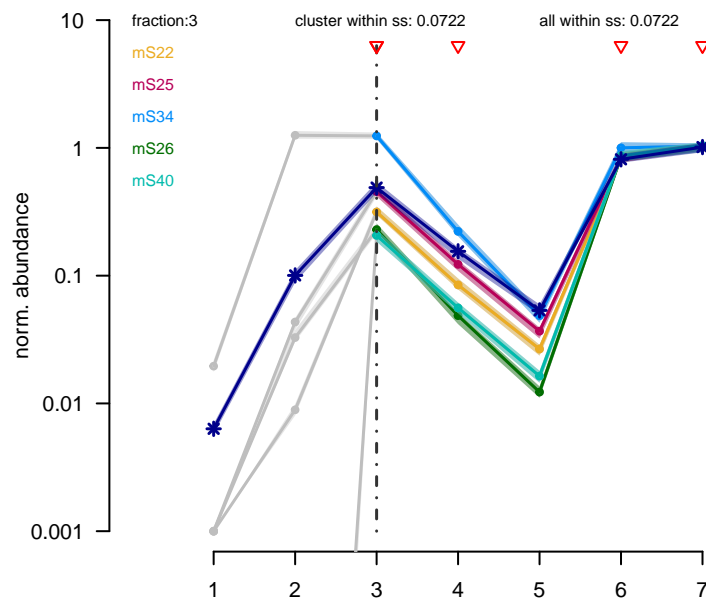

**mS39**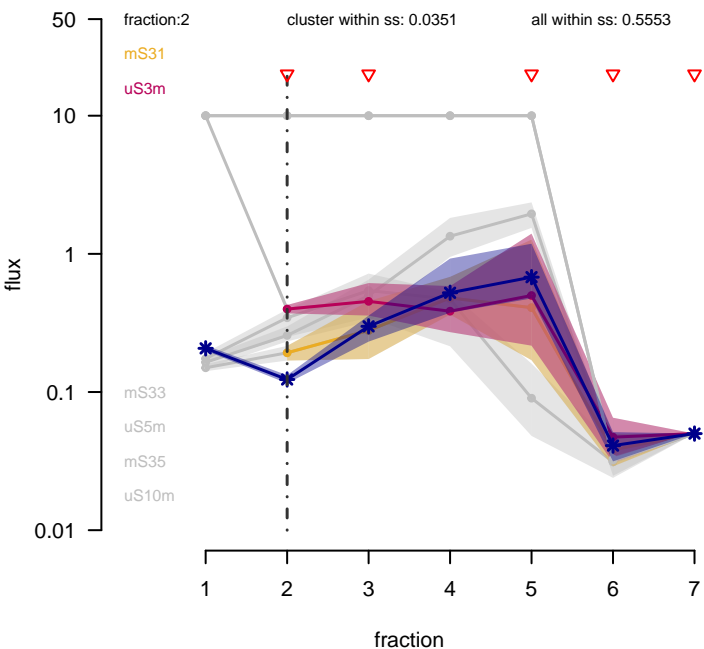**mS39**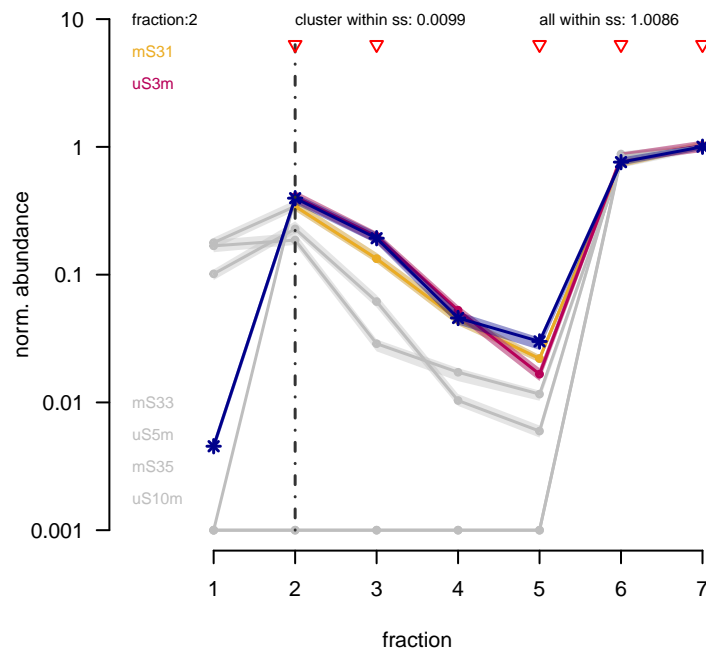**mS31**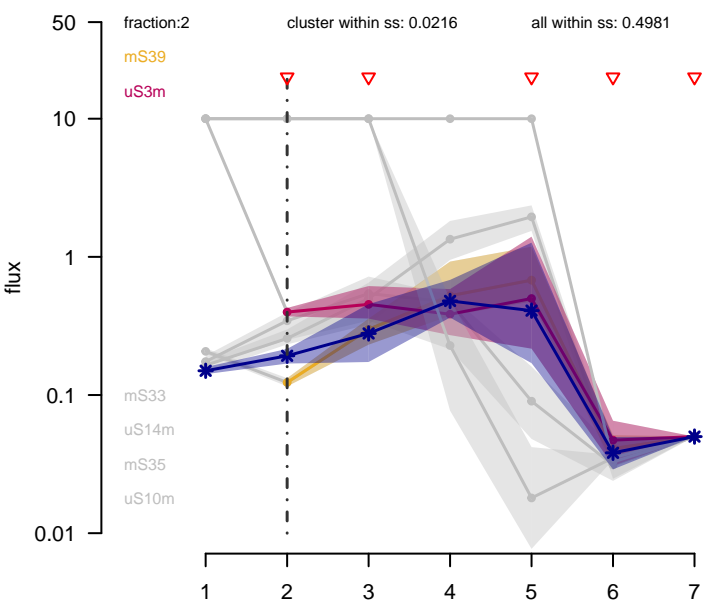**mS31**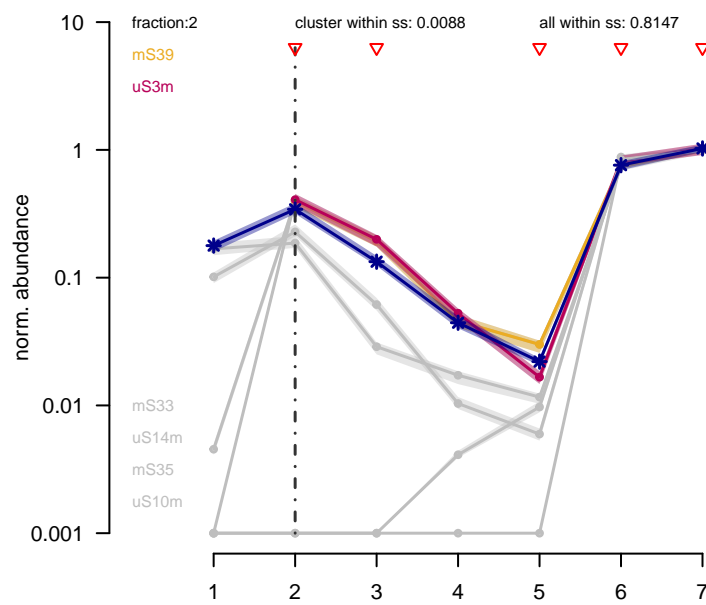**uS3m**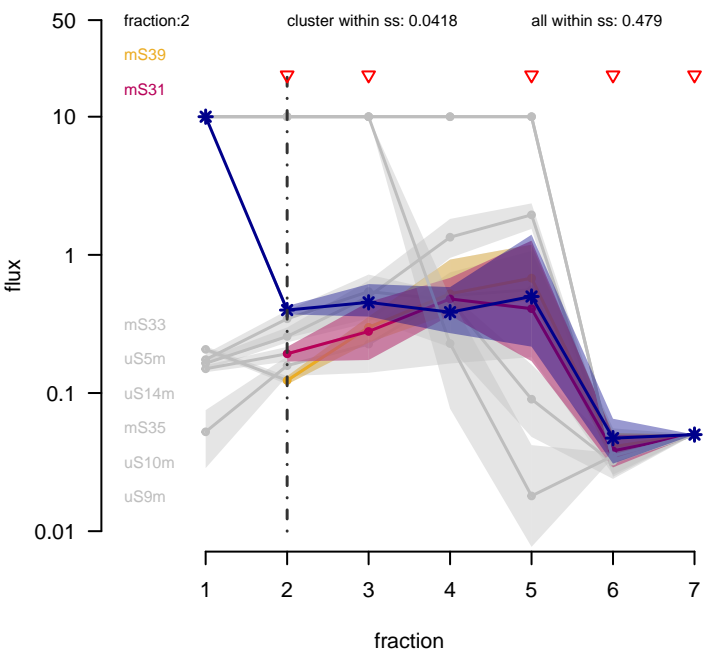**uS3m**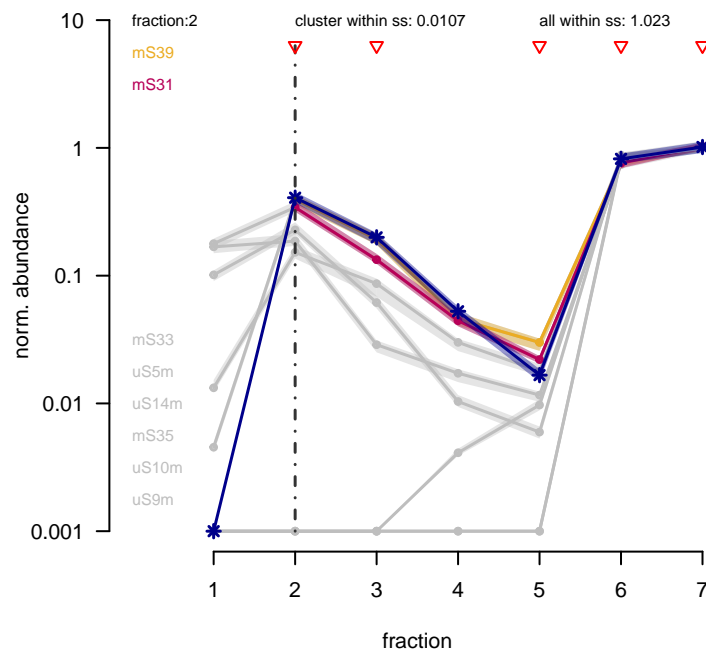

### uS14m

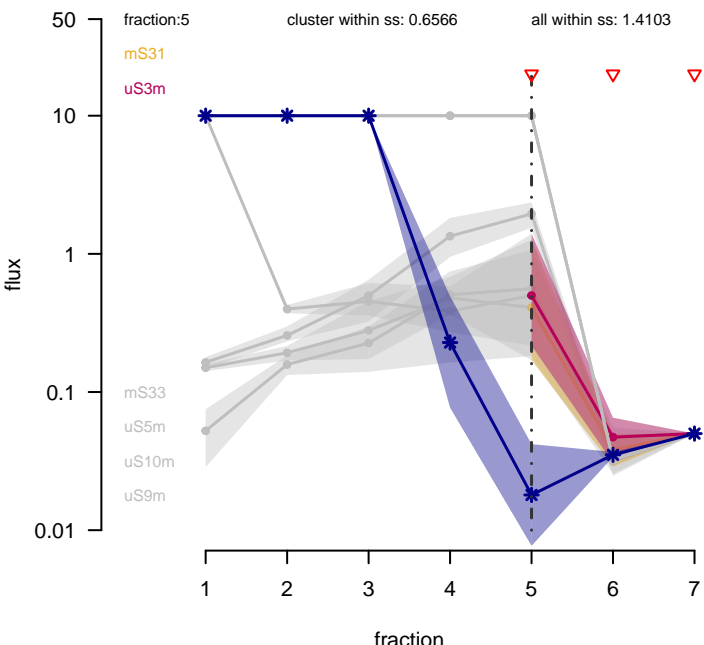

### uS14m

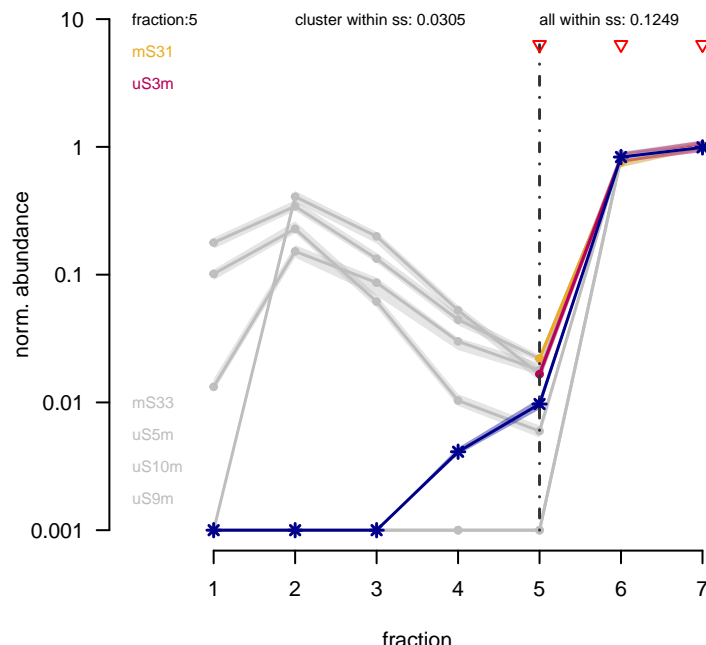

### uS15m

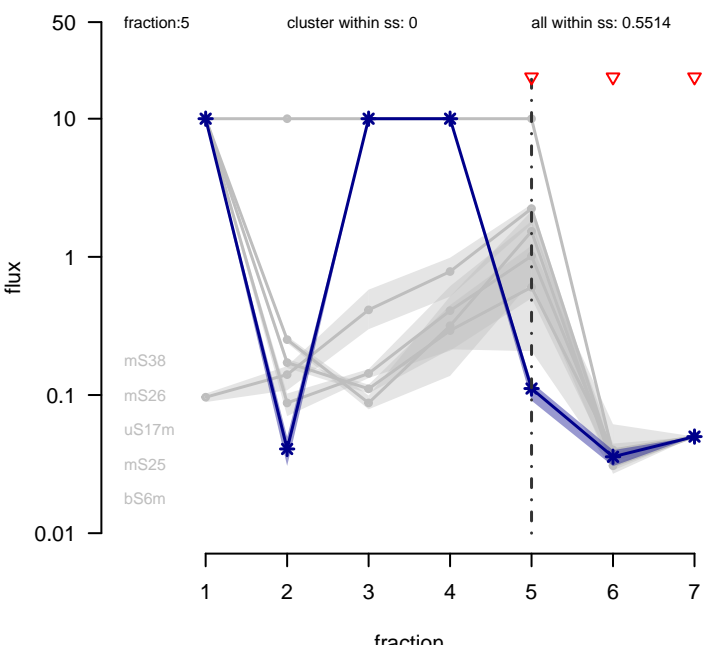

### uS15m

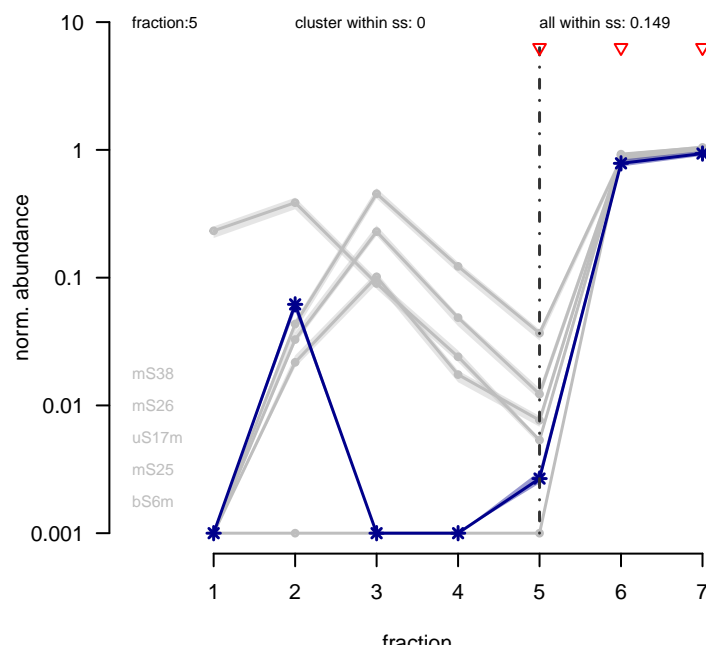

### mS29

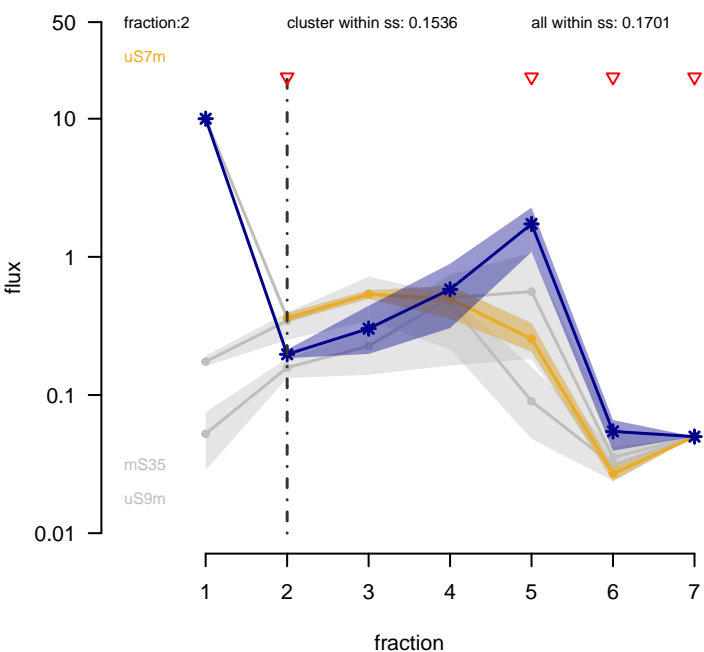

### mS29

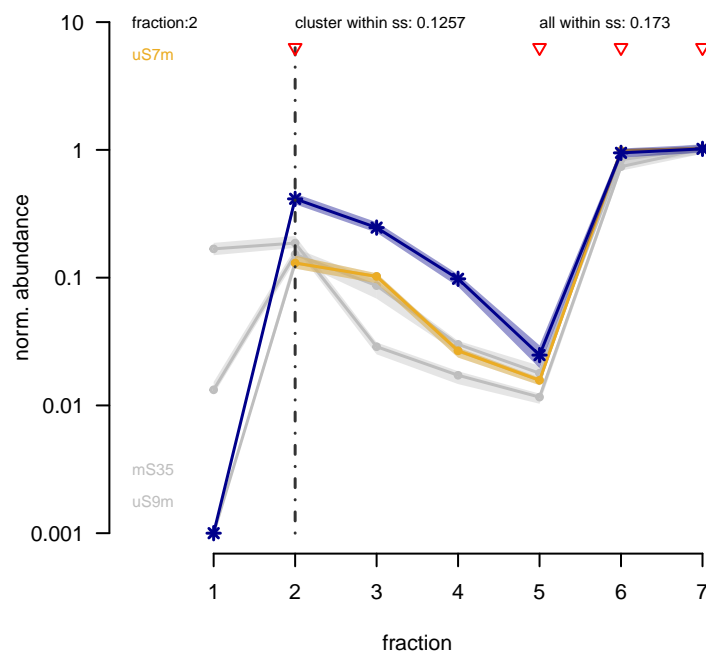

### uS7m

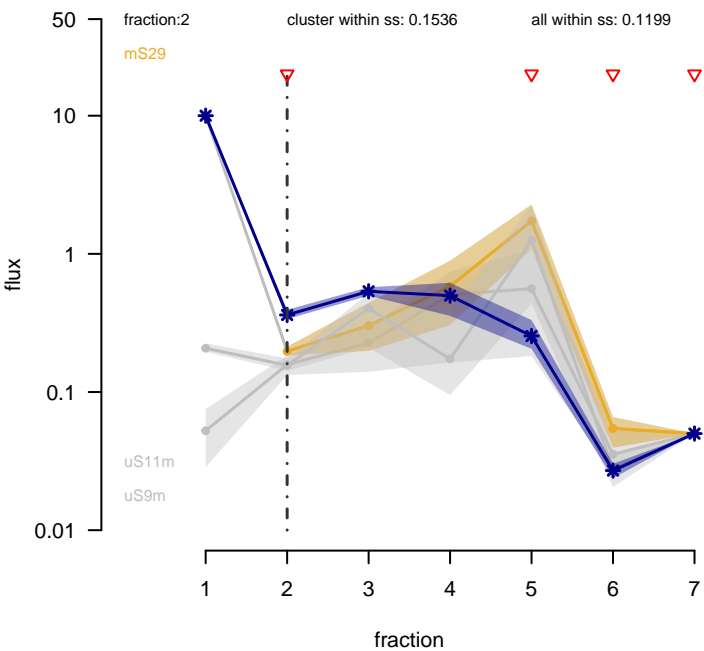

### uS7m

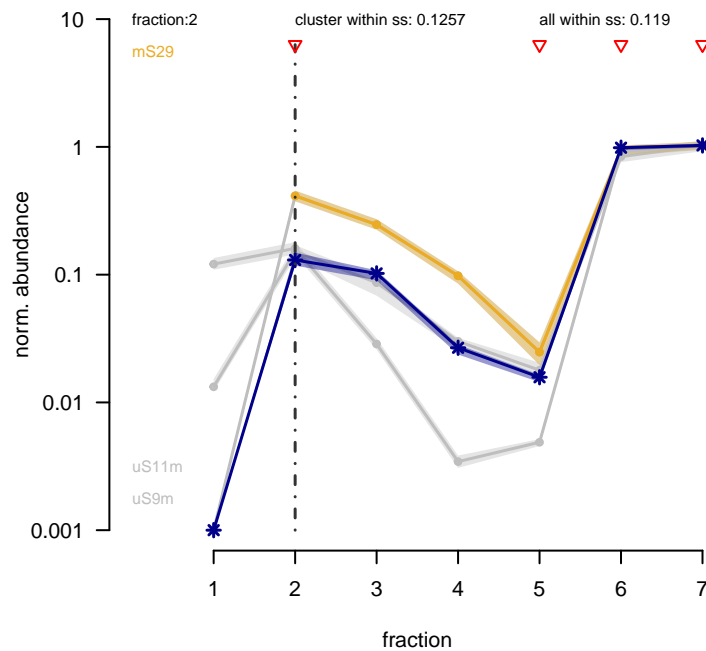

### bS21m

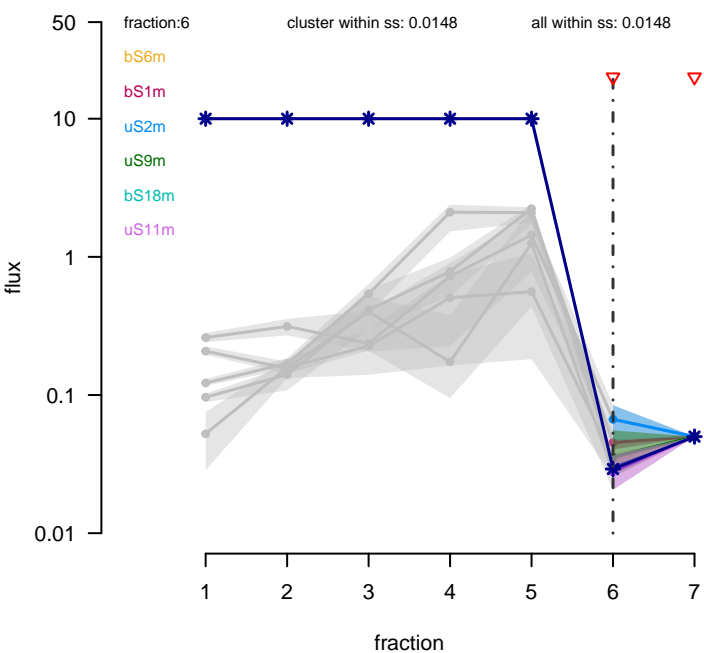

### bS21m

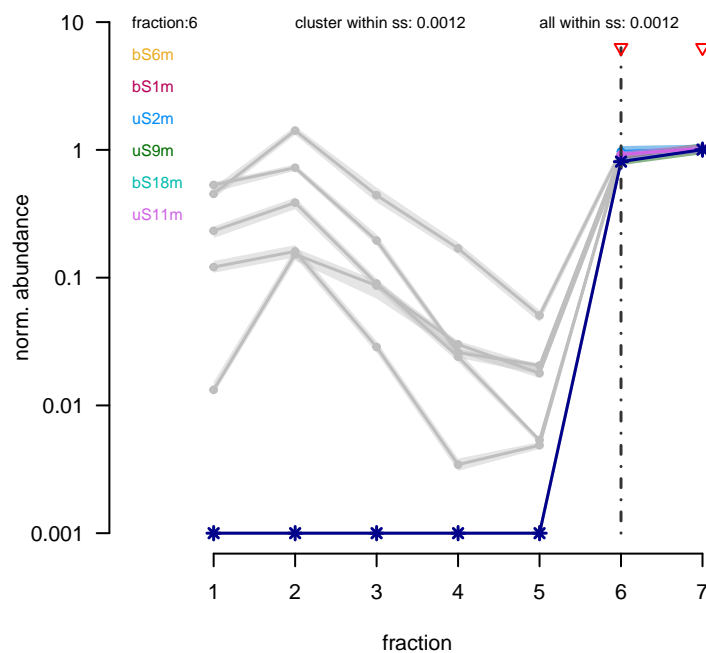

### bS18m

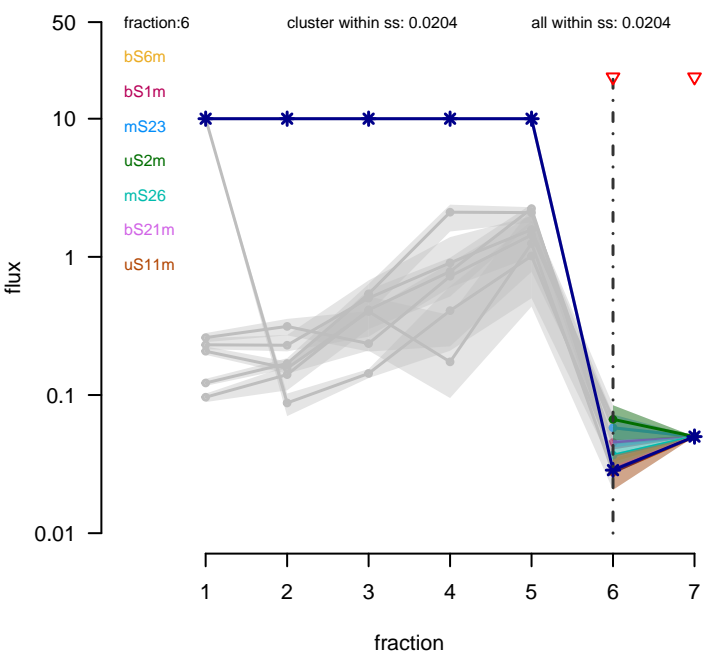

### bS18m

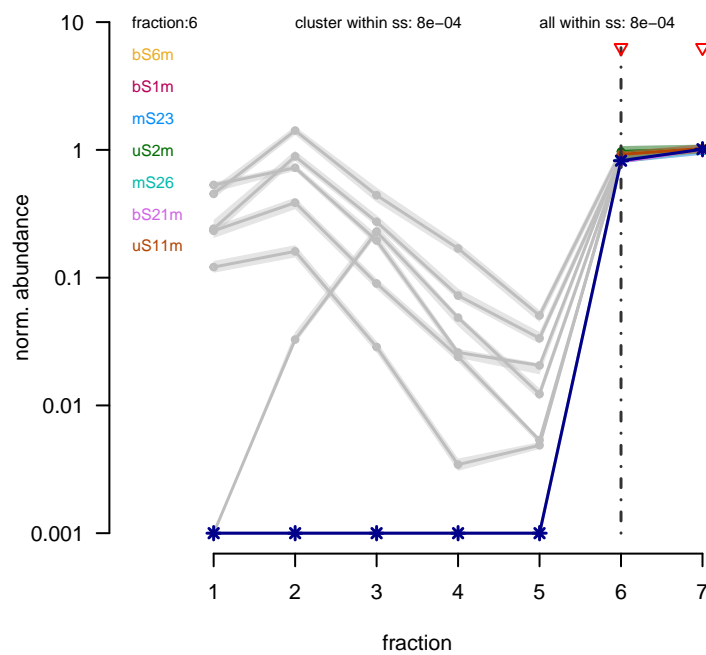



### uS5m

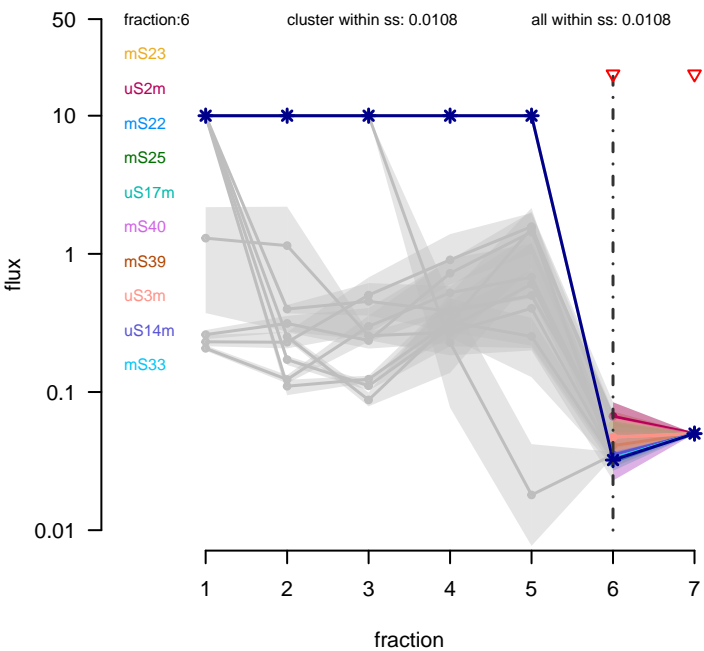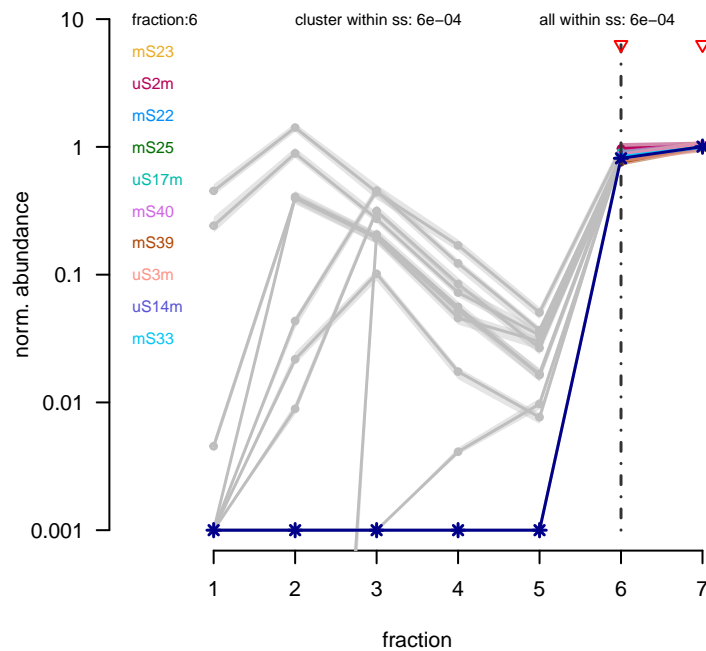

### mS33

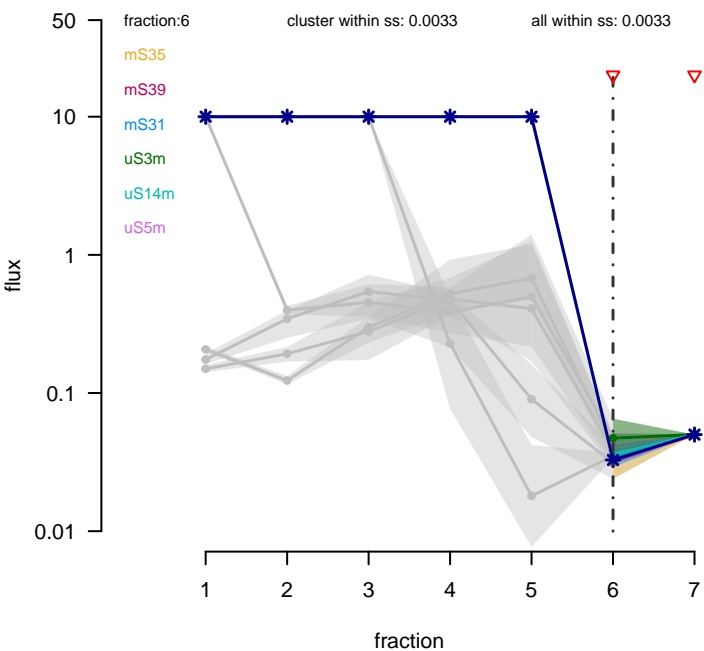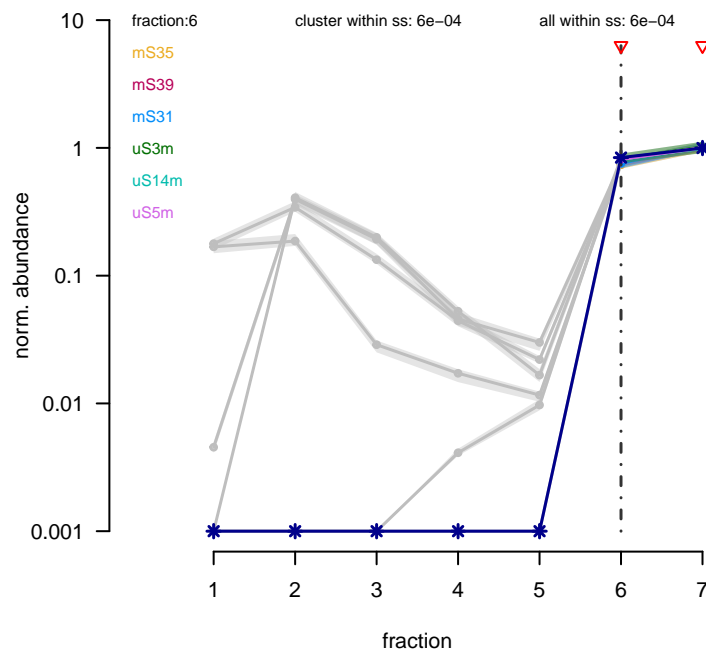

### mS38

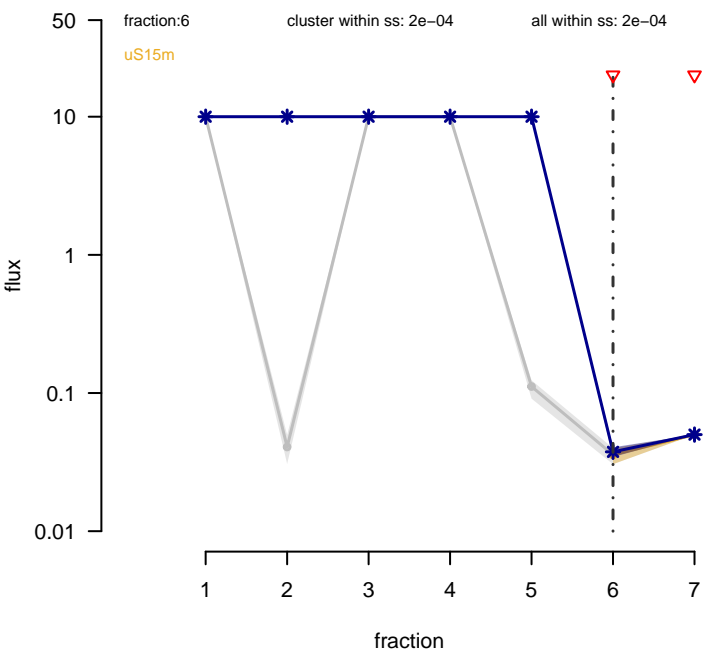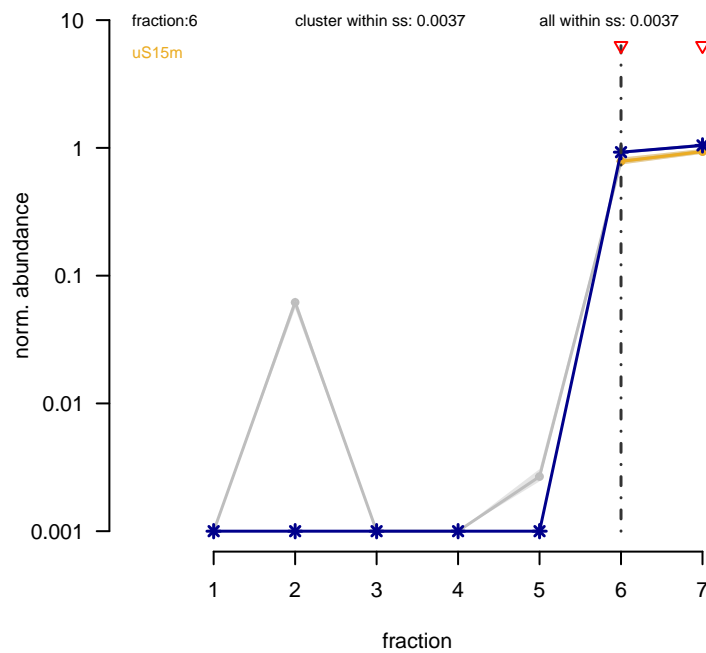

### uS11m

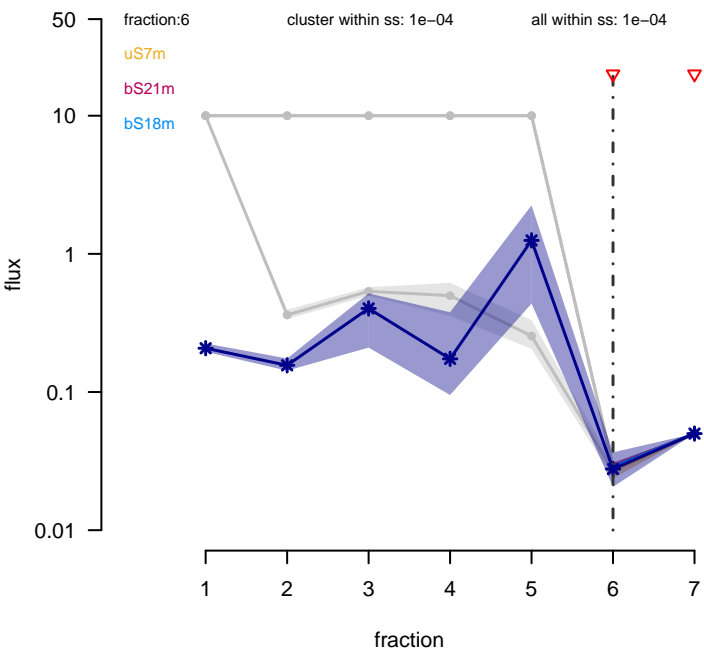

### uS11m

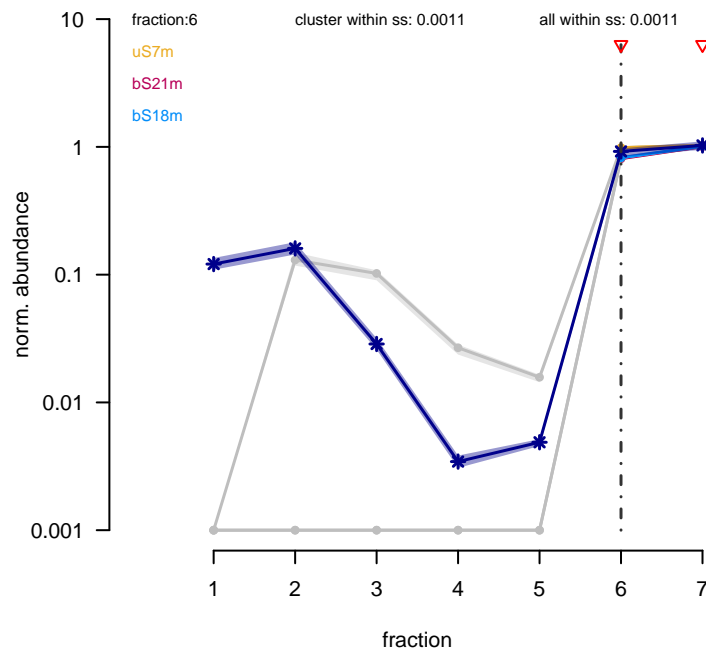

### uS12m

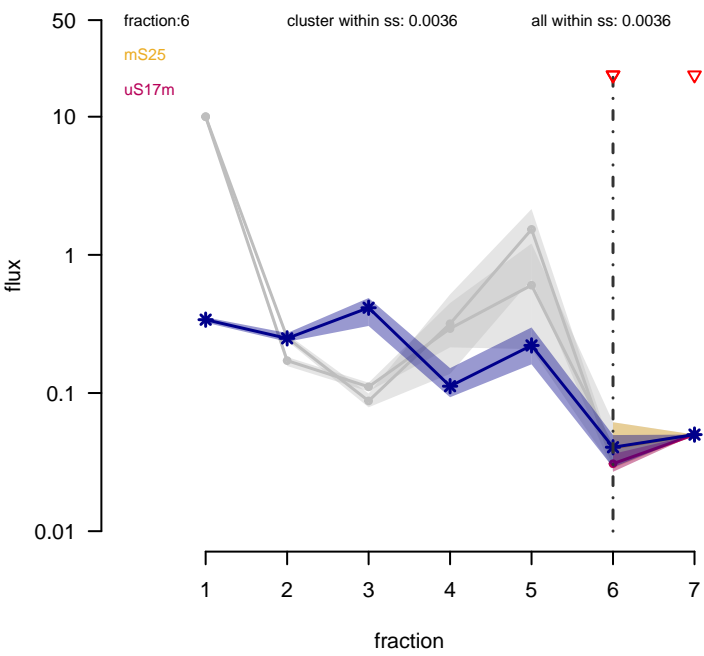

### uS12m

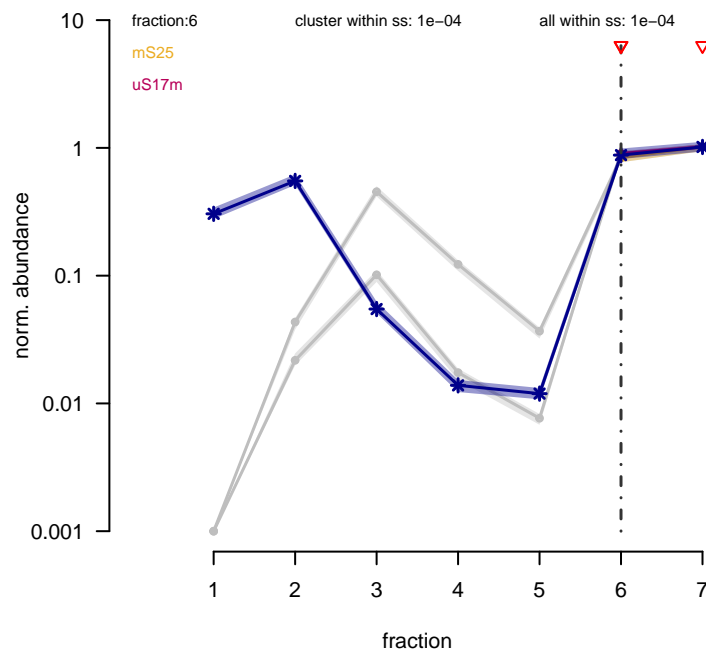

Supplement: 41594_2024_1356_MOESM11_ESM.pdf [file 41594_2024_1356_MOESM11_ESM.pdf]
