# Supplementary material for: A roadmap for ribosome assembly in human mitochondria
Source: PubMed Central journal article supplement (PMC11638073; doi:10.1038/s41594-024-01356-w), 2024-07-11

**mL40**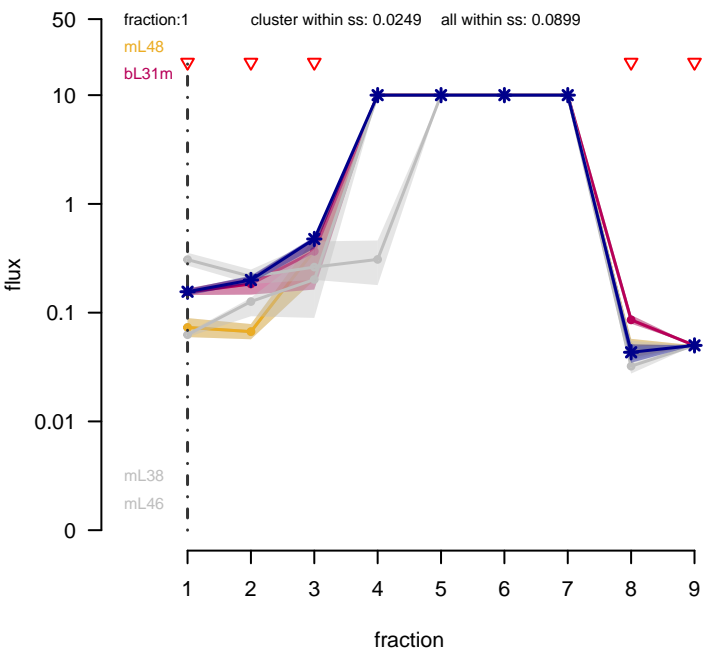**mL40**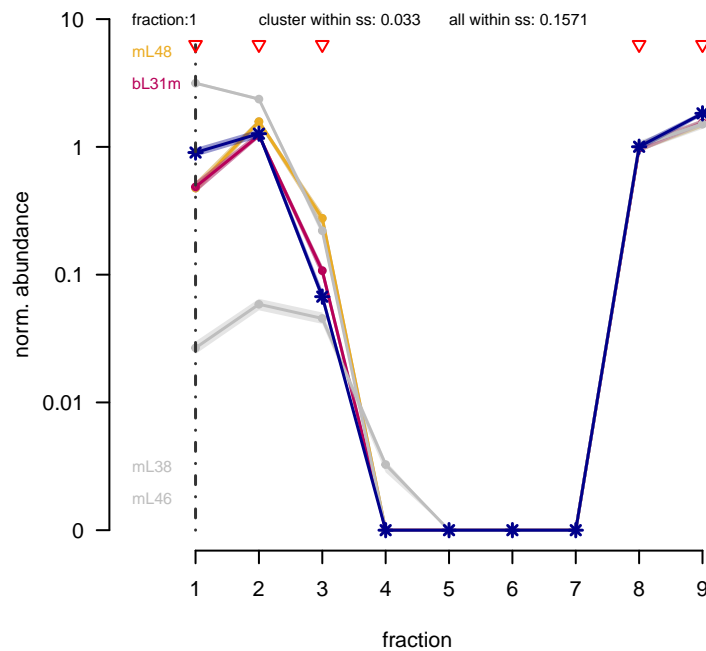**mL48**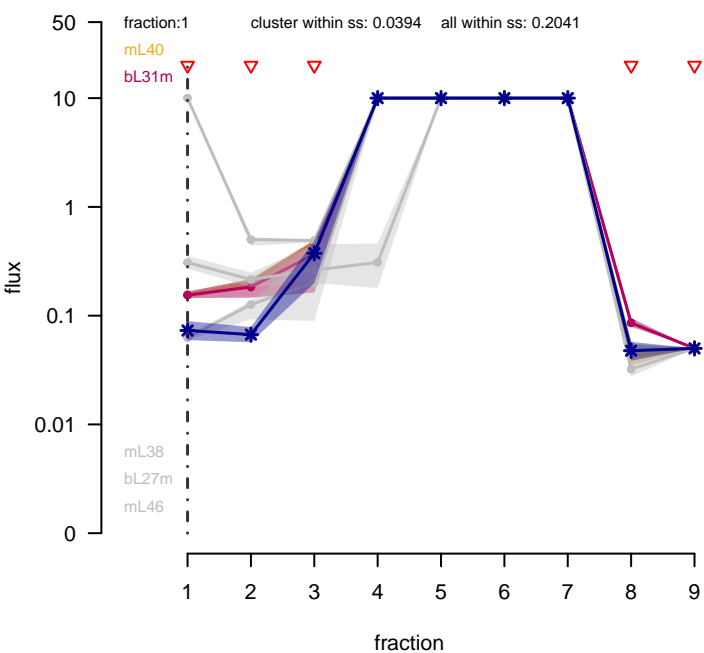**mL48**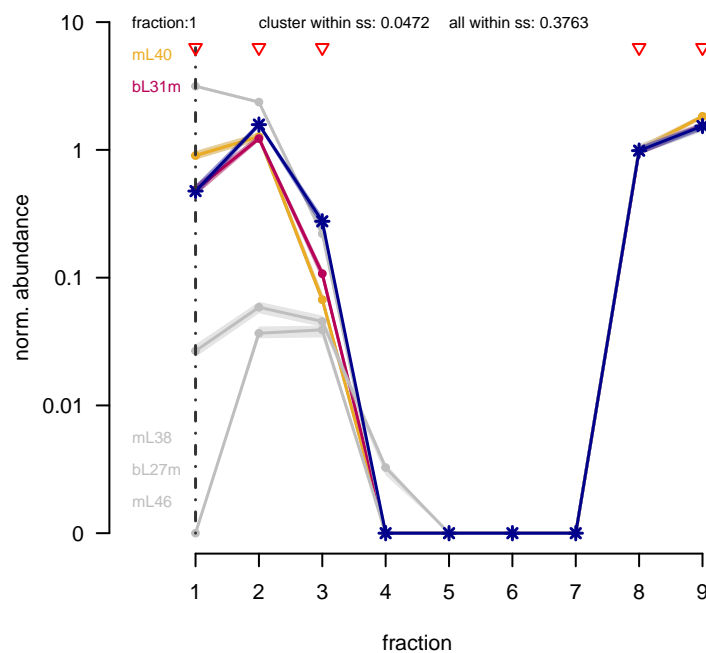**bL31m**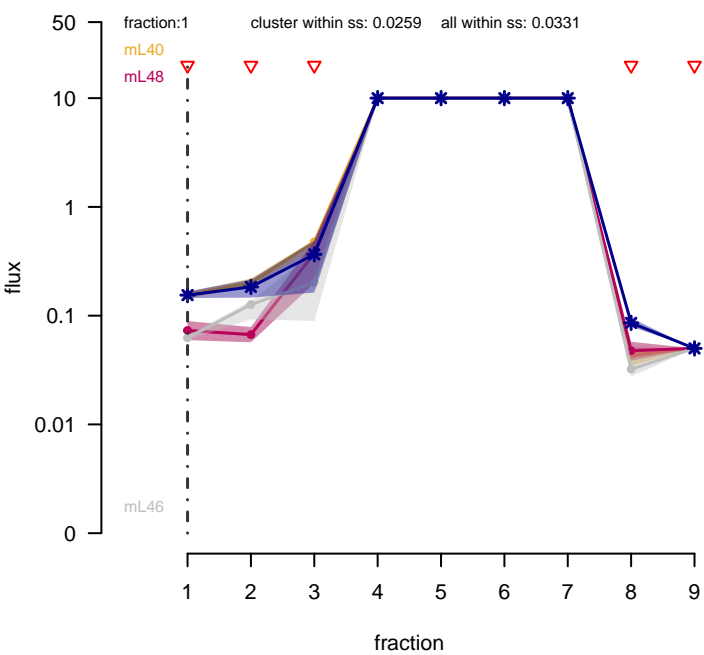**bL31m**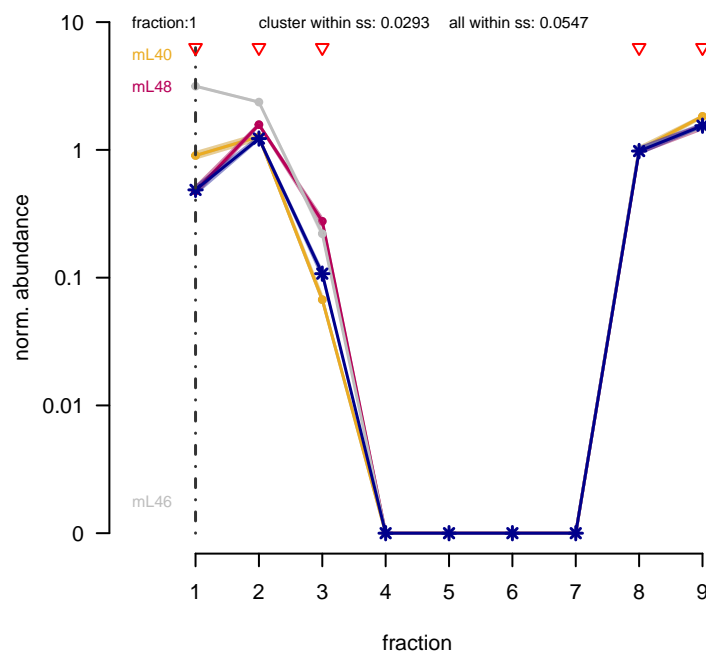

**mL46**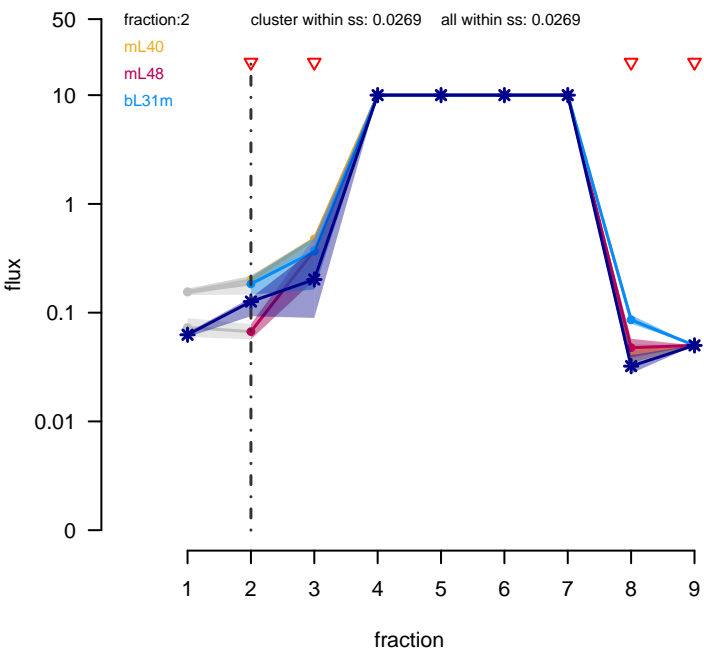**mL46**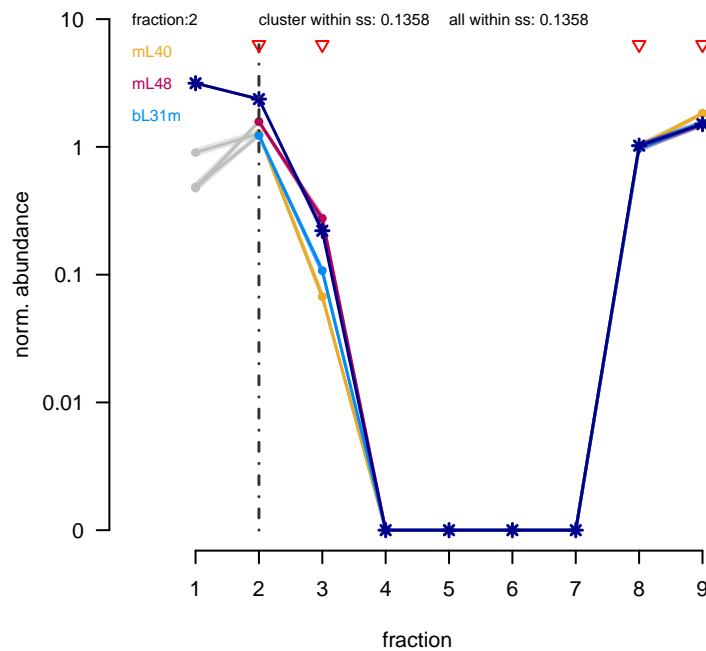**bL27m**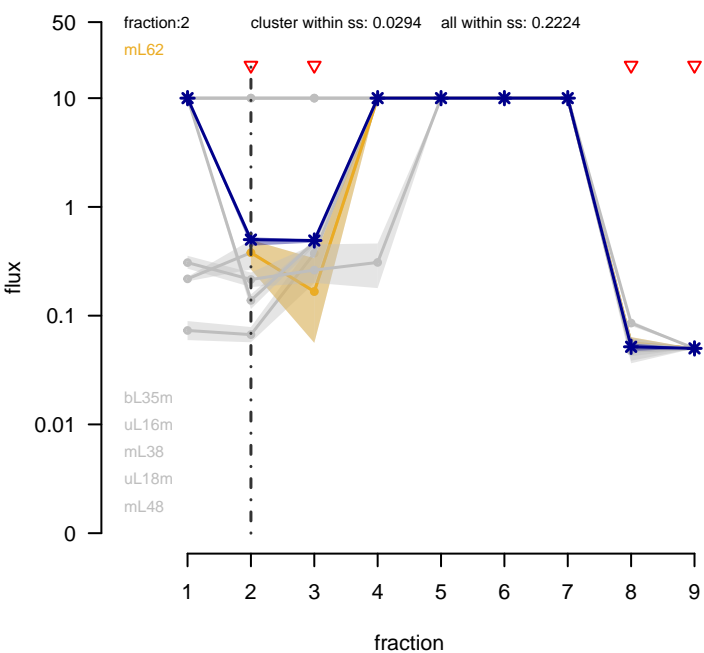**bL27m**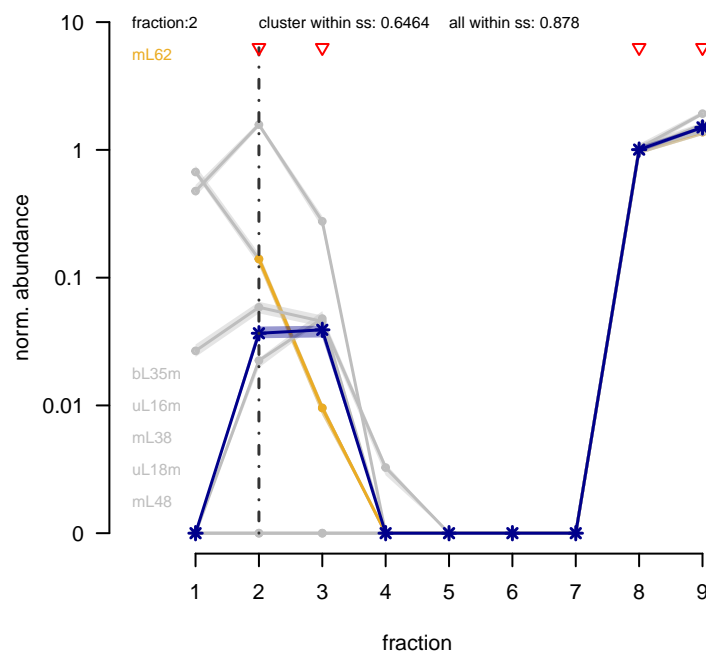**mL62**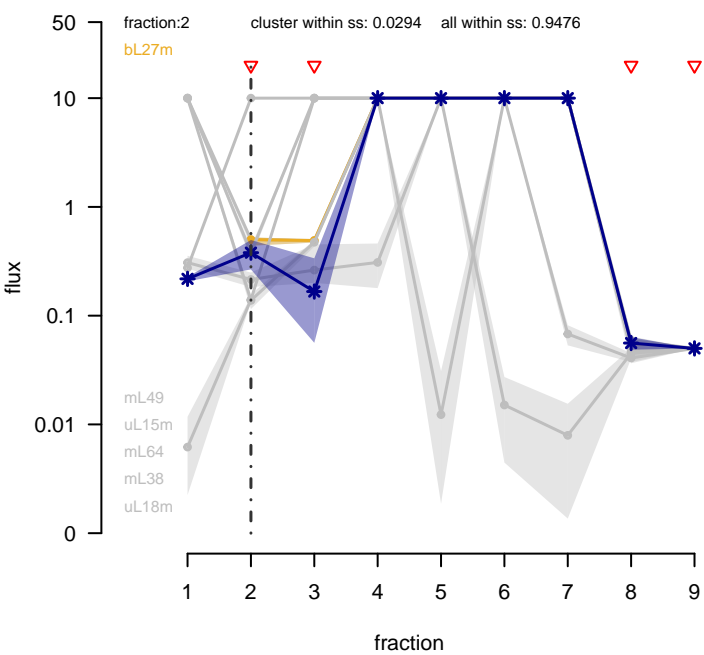**mL62**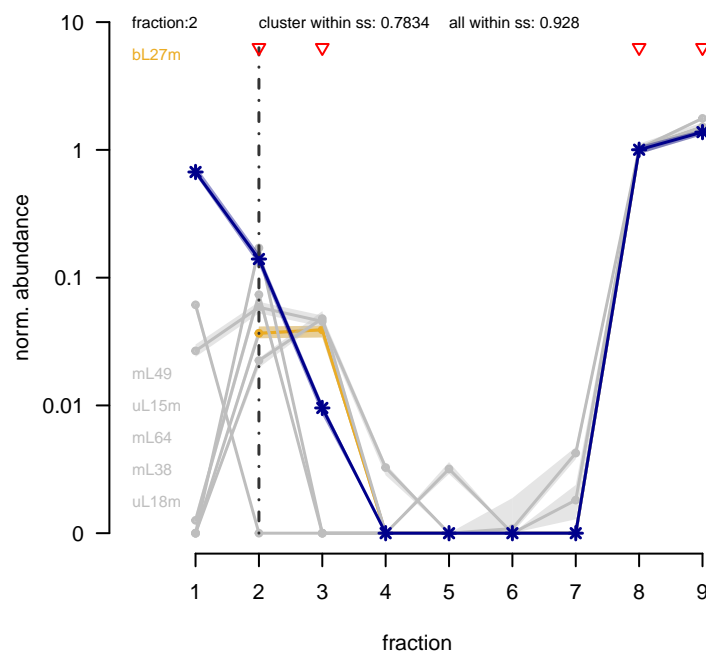

### uL18m

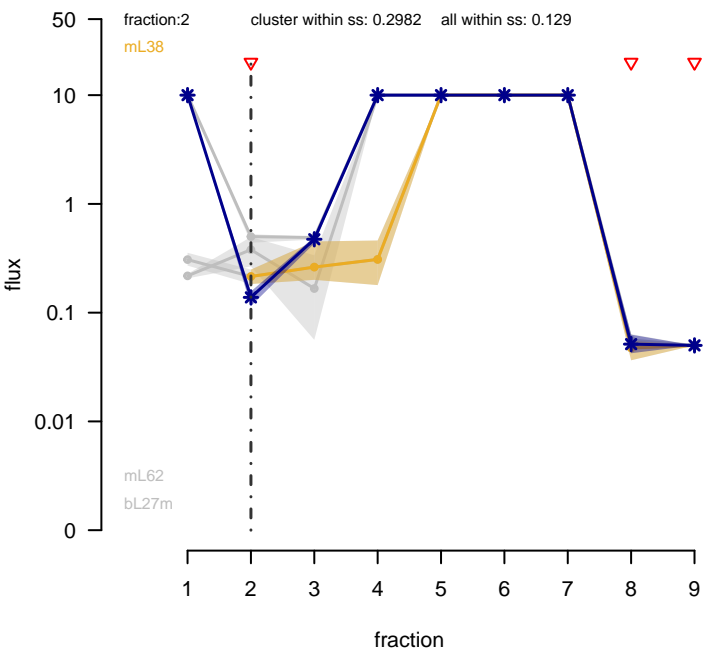

### uL18m

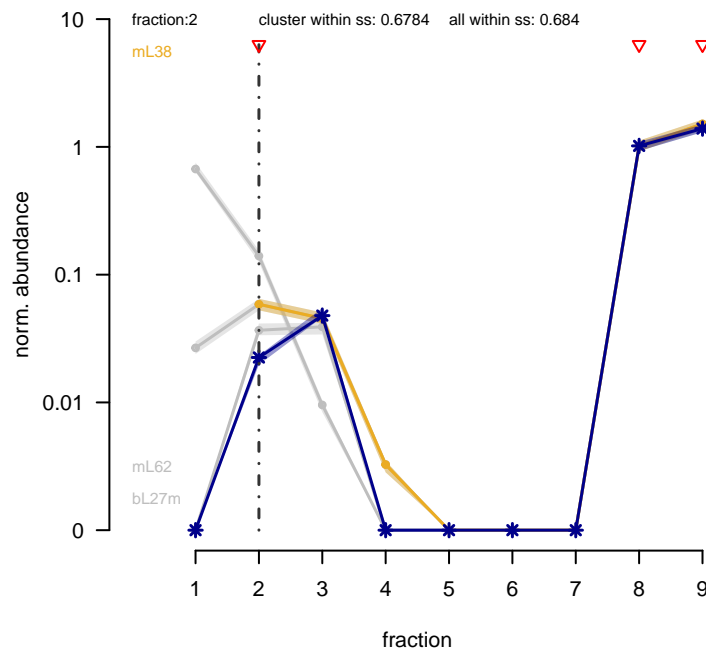

### mL38

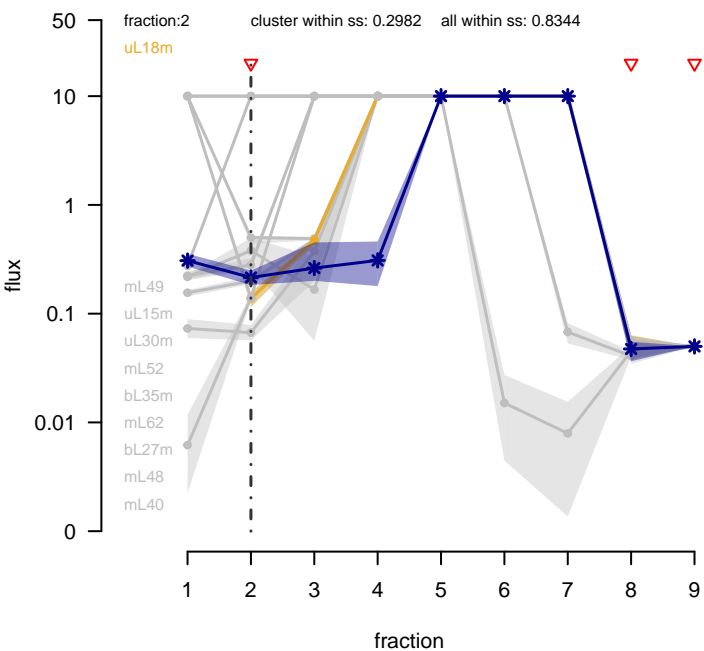

### mL38

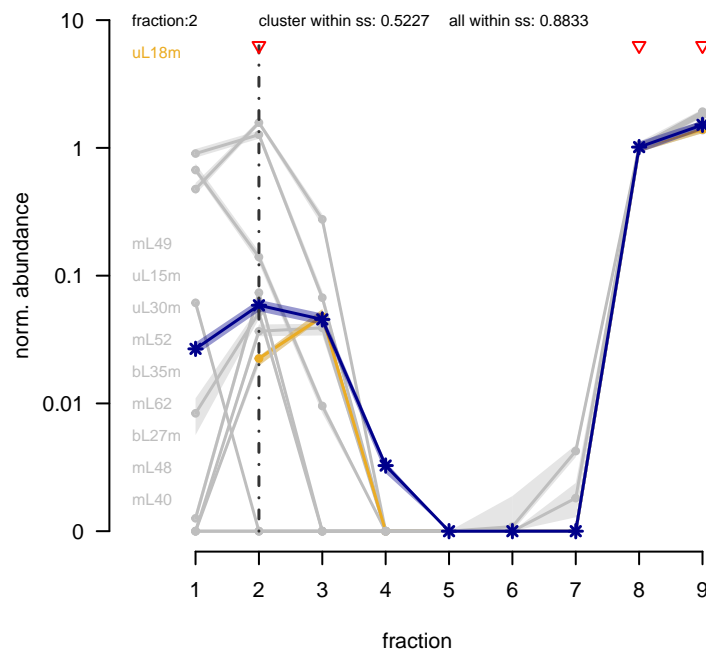

### uL10m

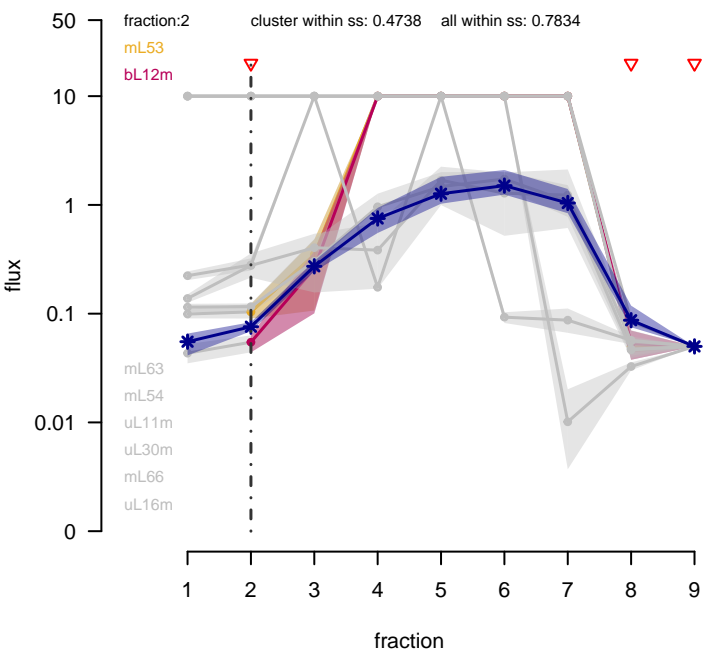

### uL10m

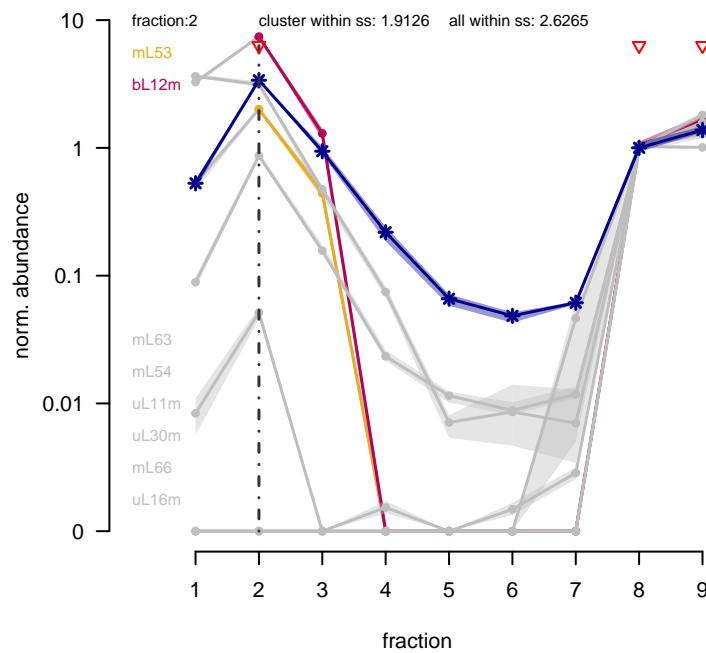

**mL53**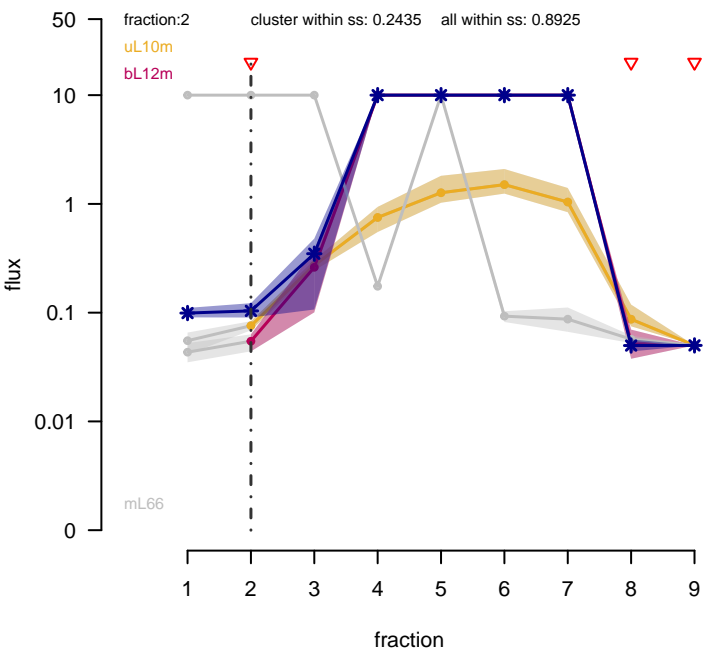**mL53**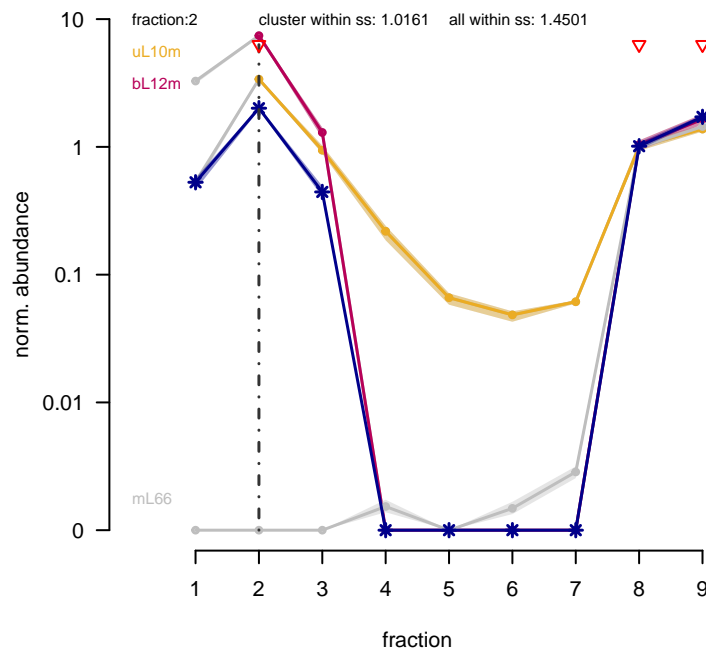**bL12m**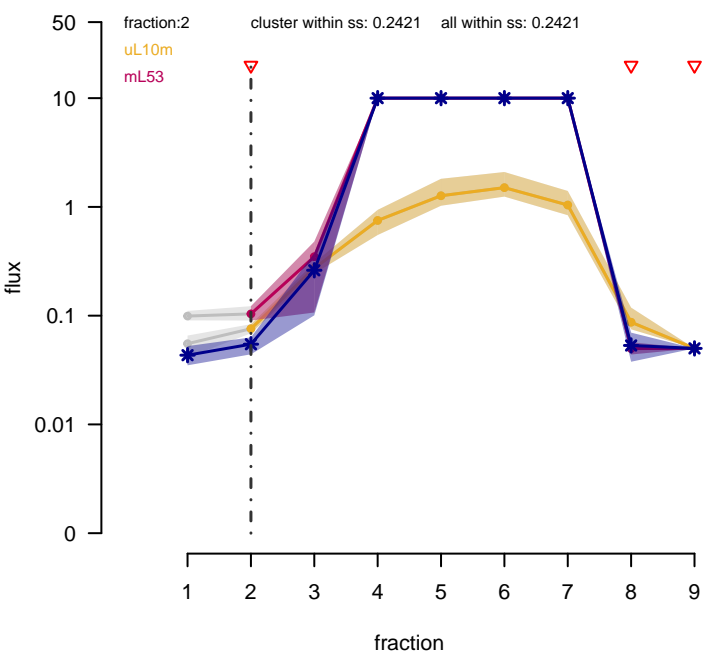**bL12m**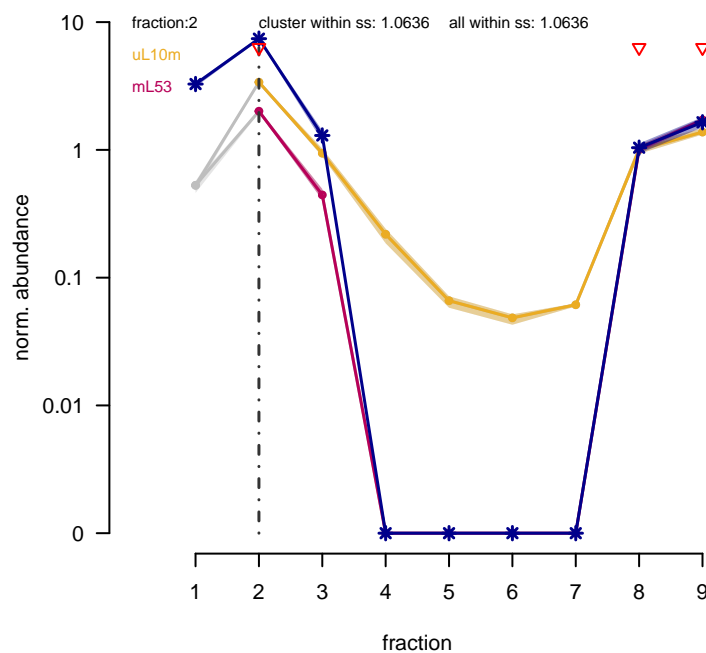**mL51**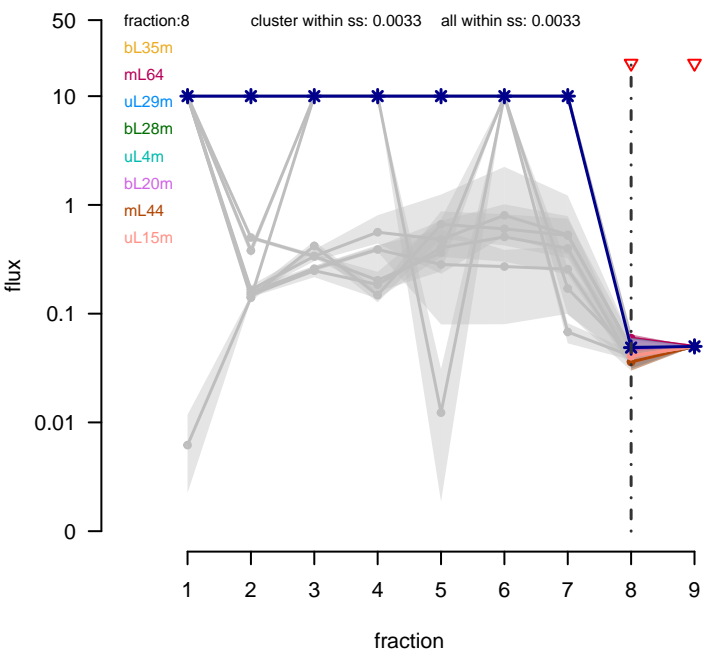**mL51**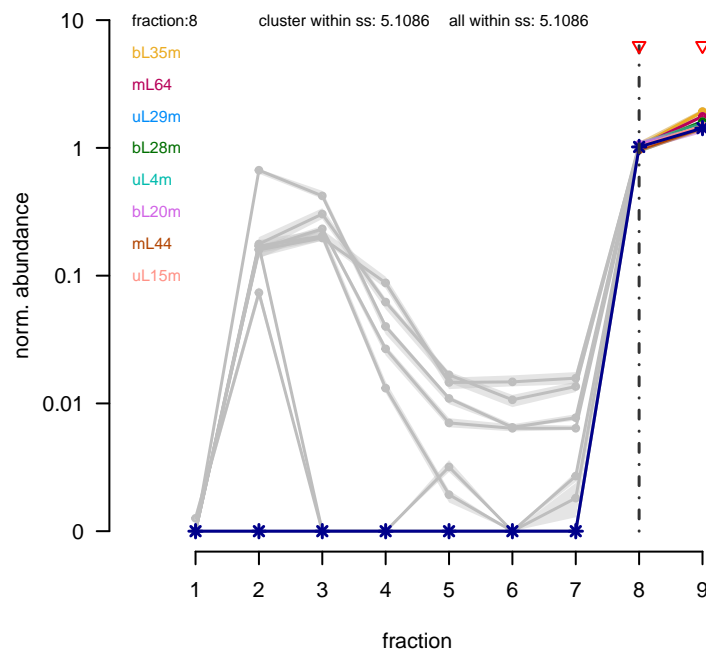

**uL16m**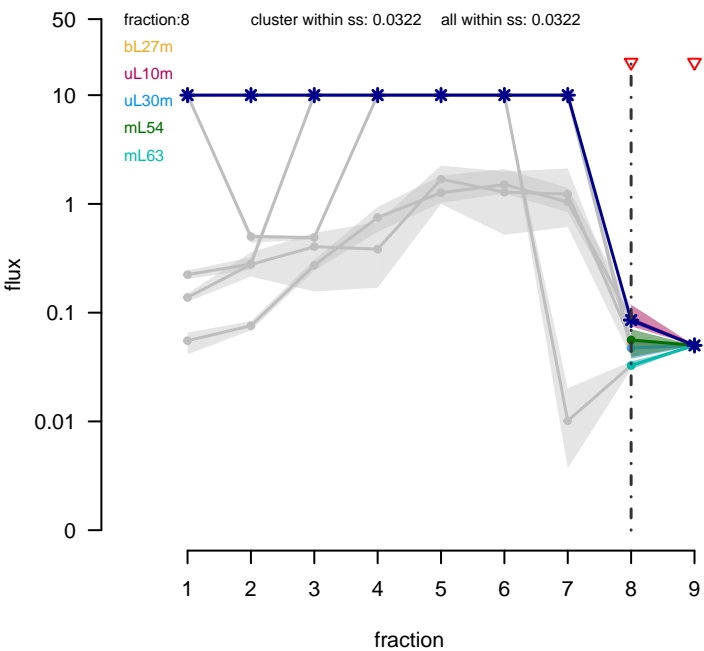**uL16m**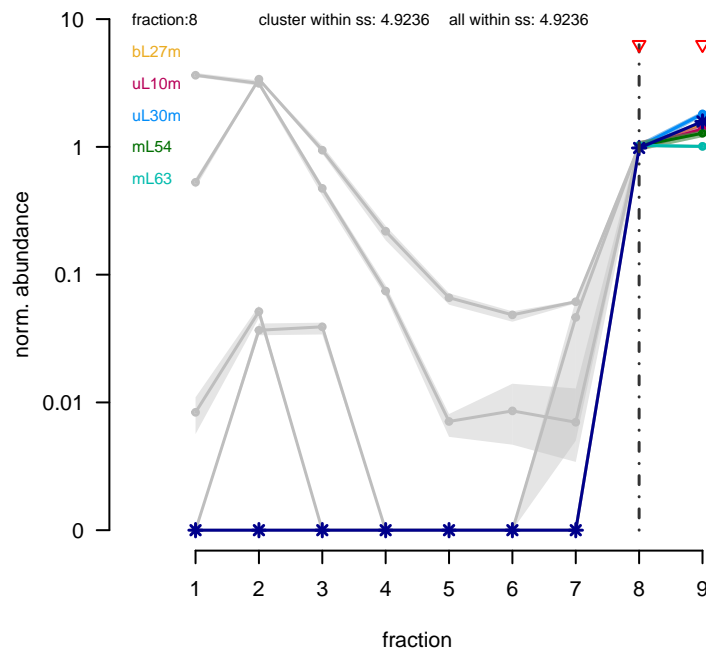**mL65**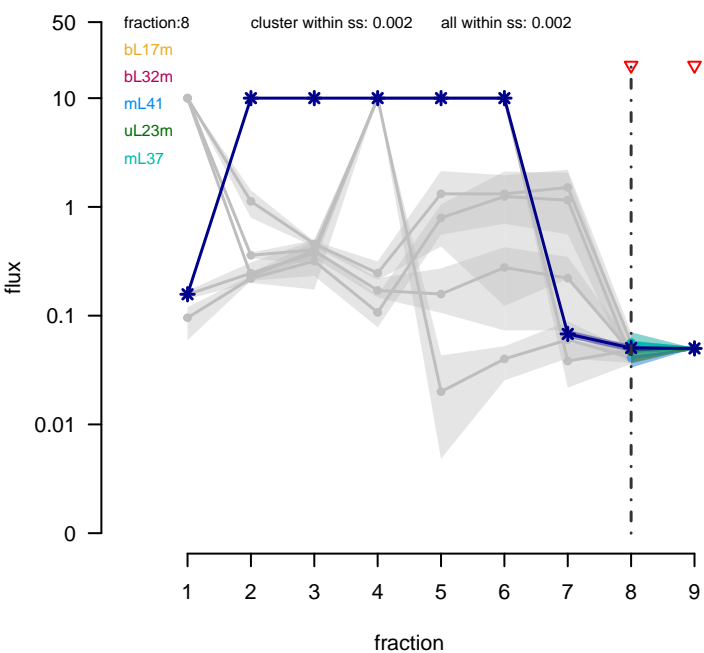**mL65**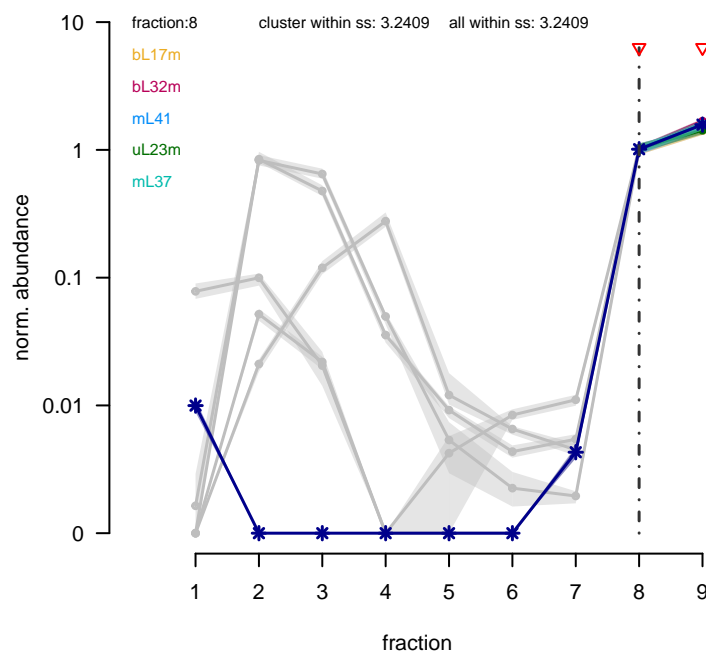**mL66**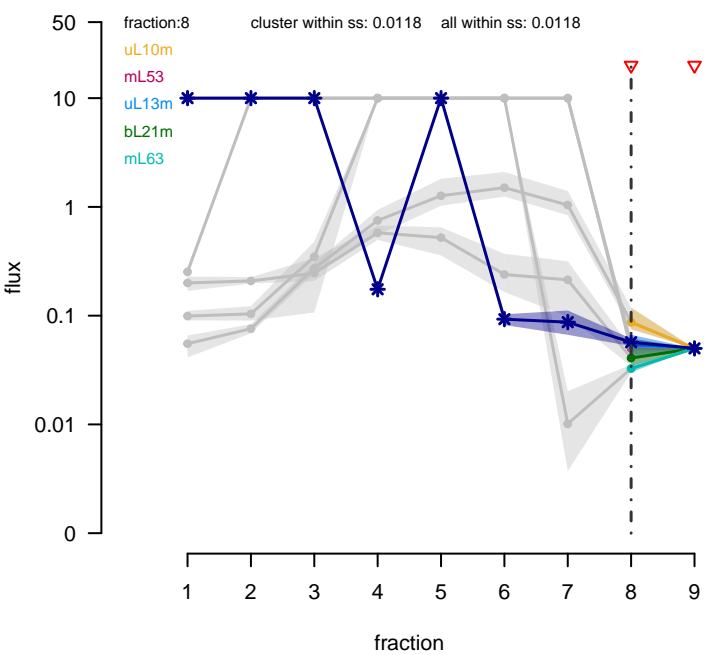**mL66**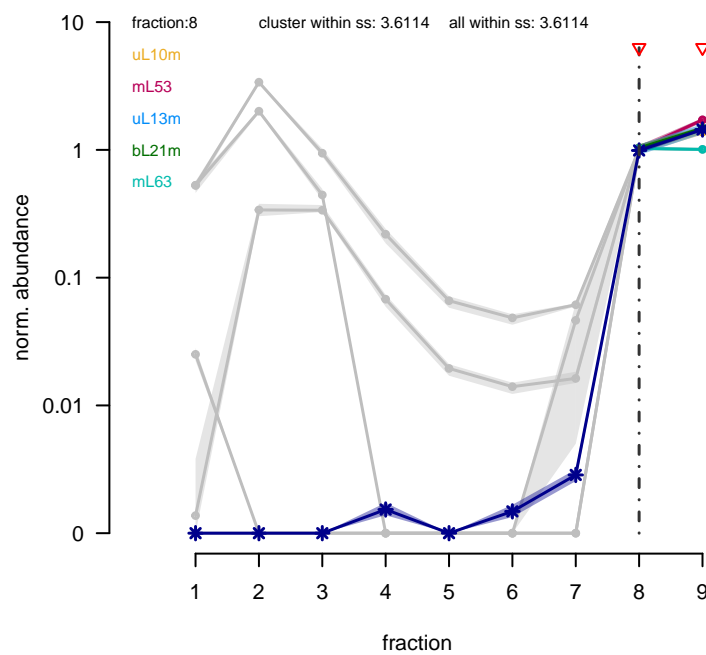

**bL35m**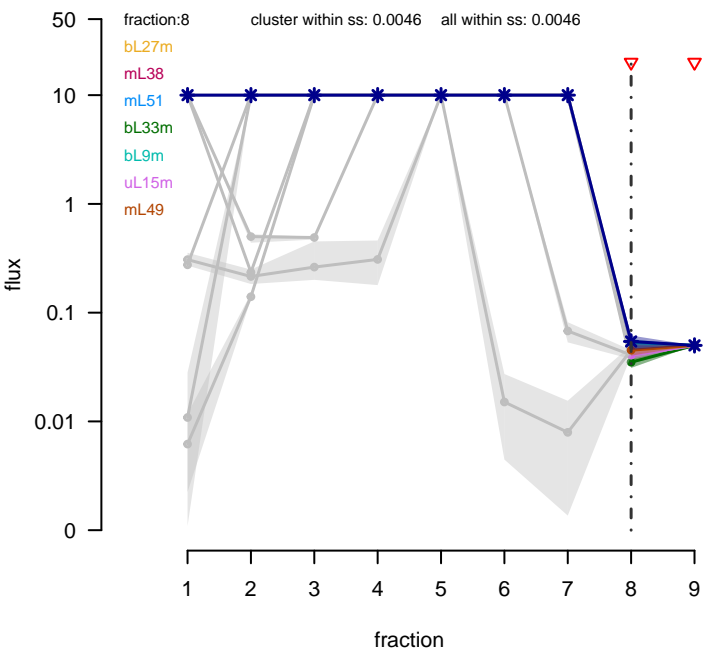**bL35m**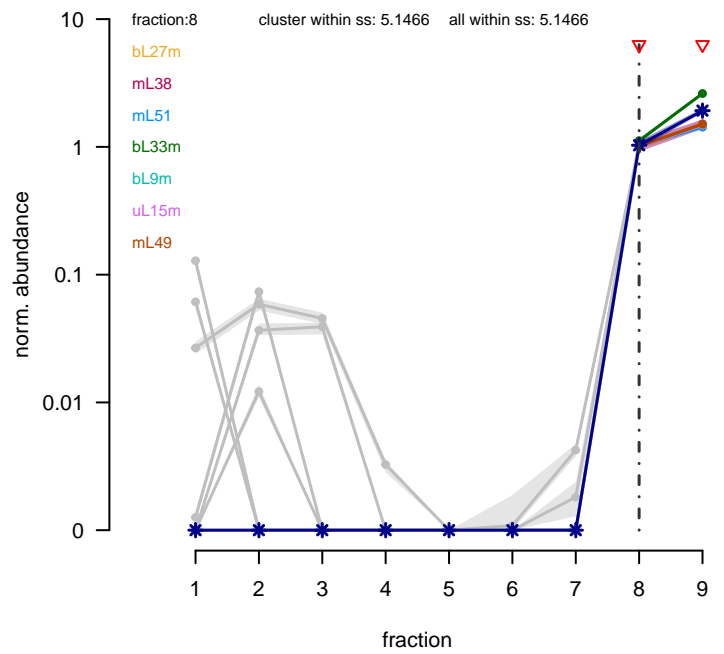**bL34m**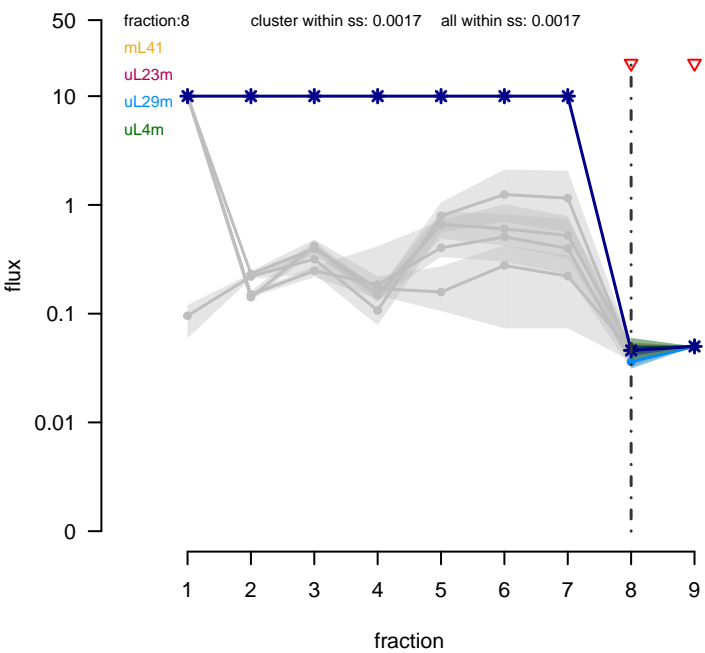**bL34m**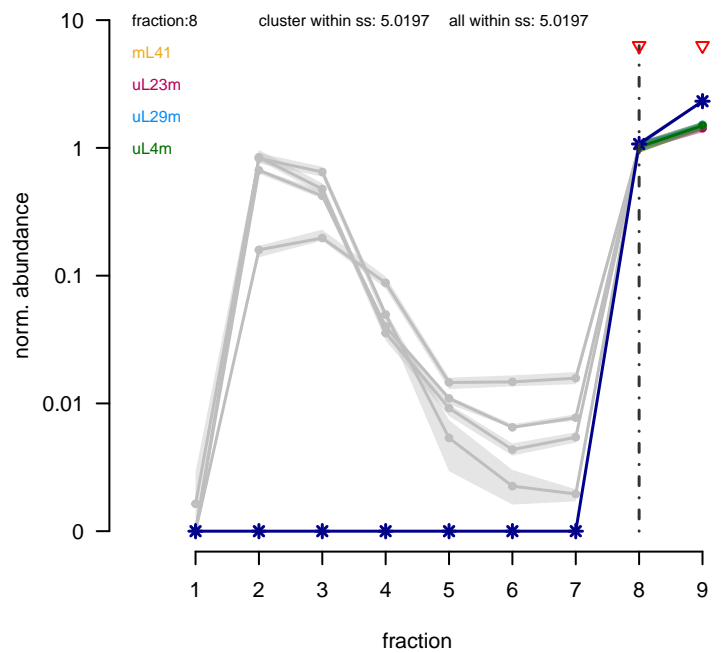**mL52**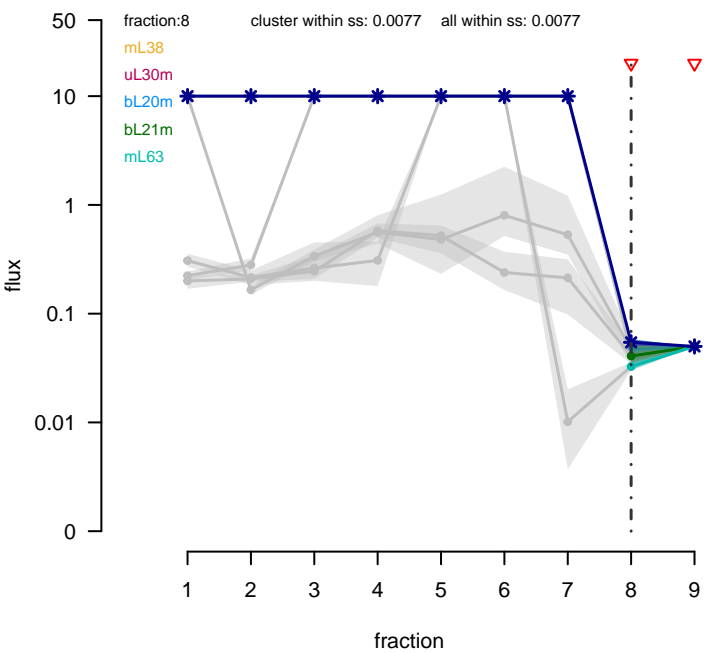**mL52**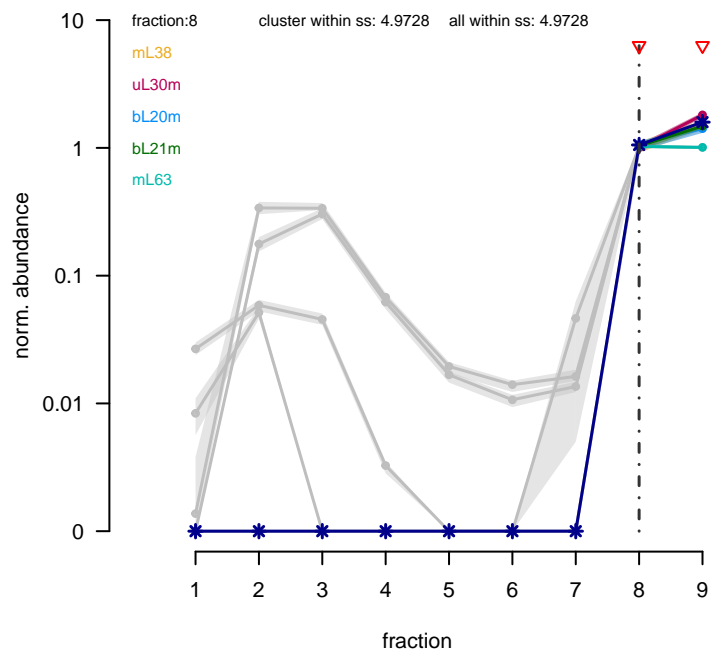

**bL33m**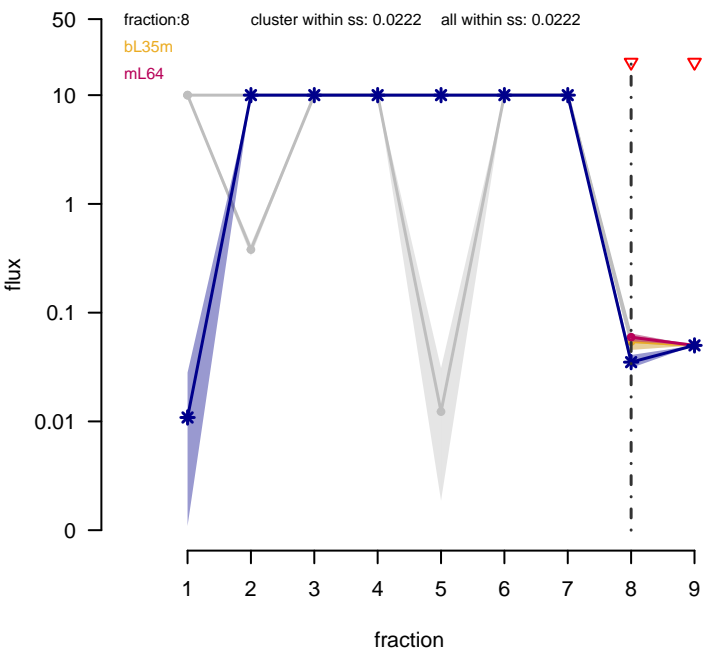**bL33m**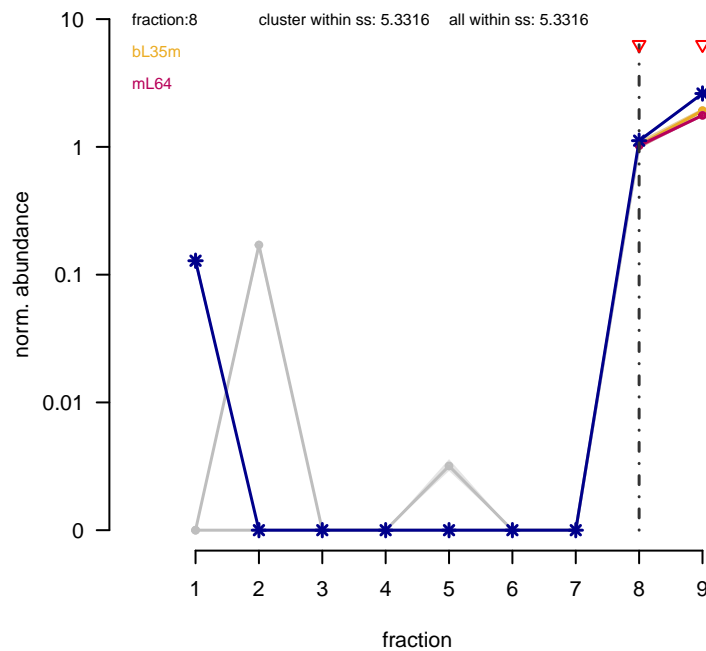**bL9m**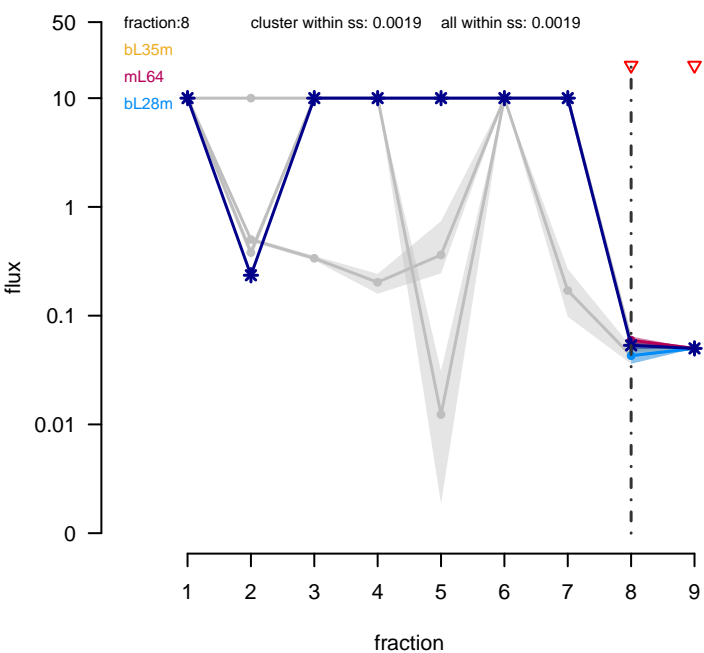**bL9m**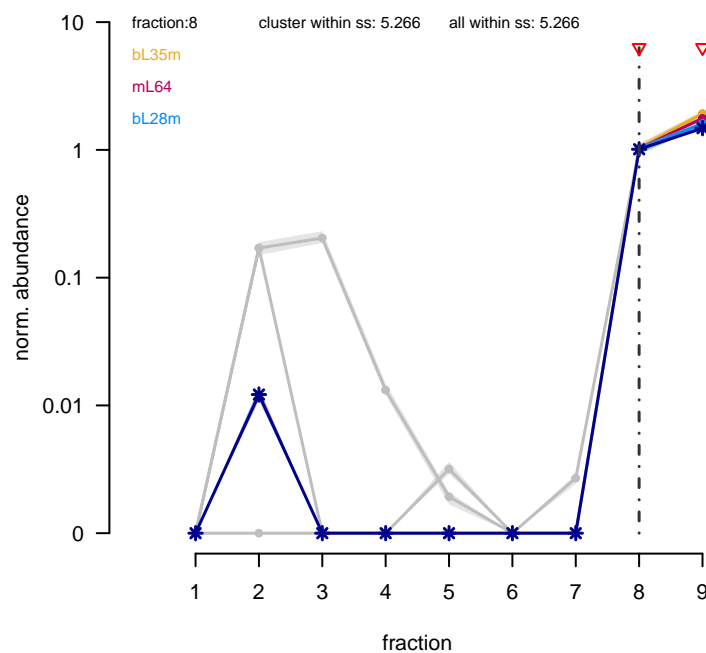**uL13m**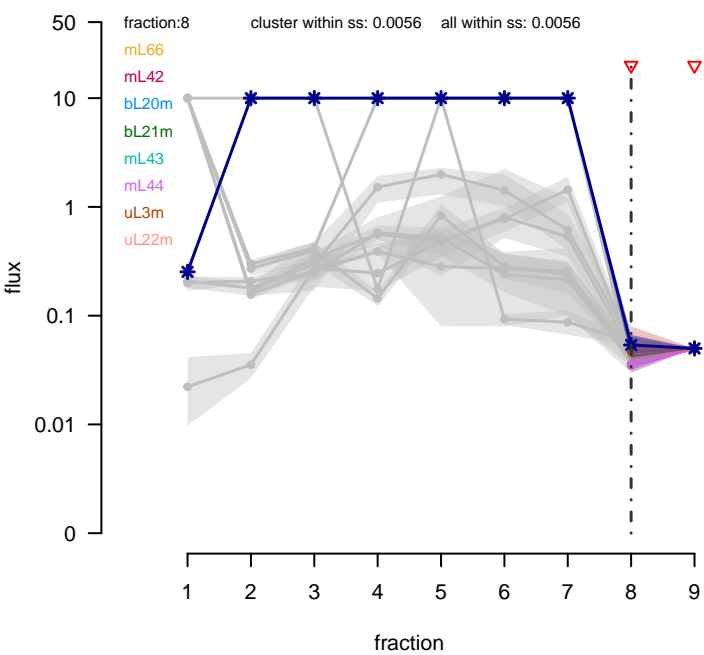**uL13m**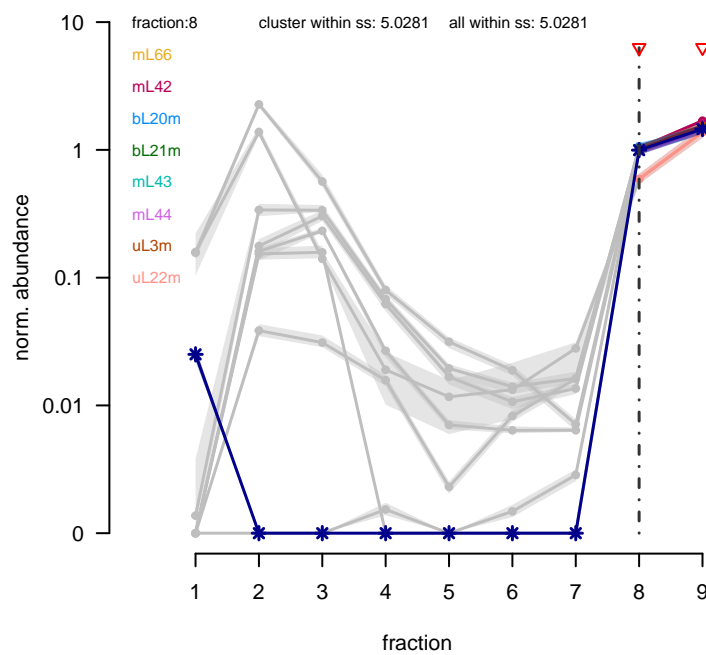

**uL14m**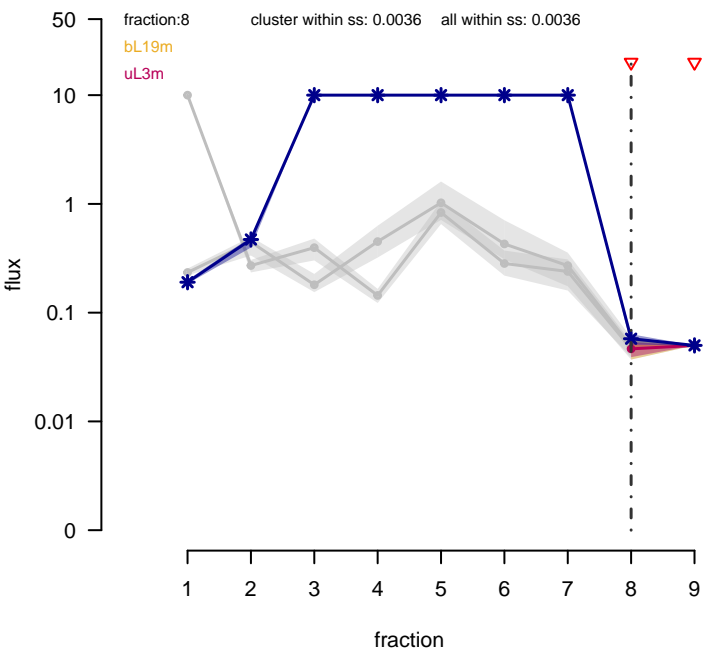**uL14m**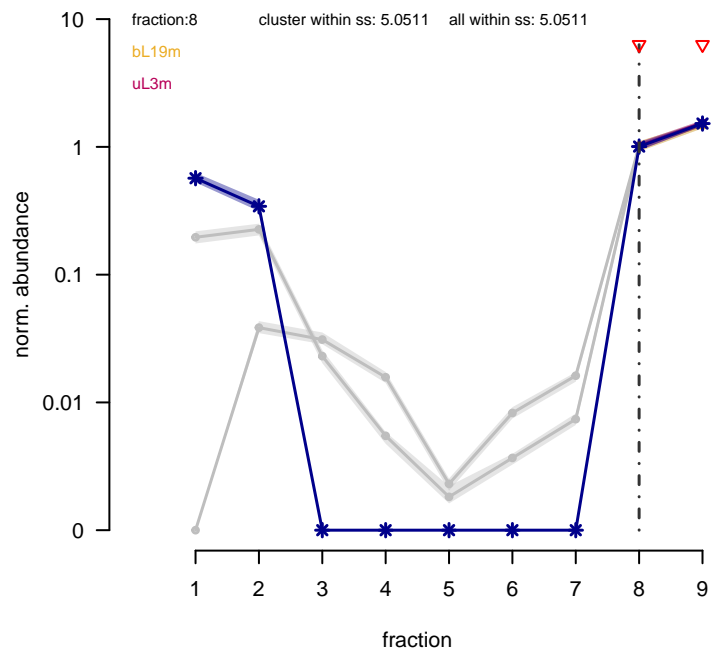**uL30m**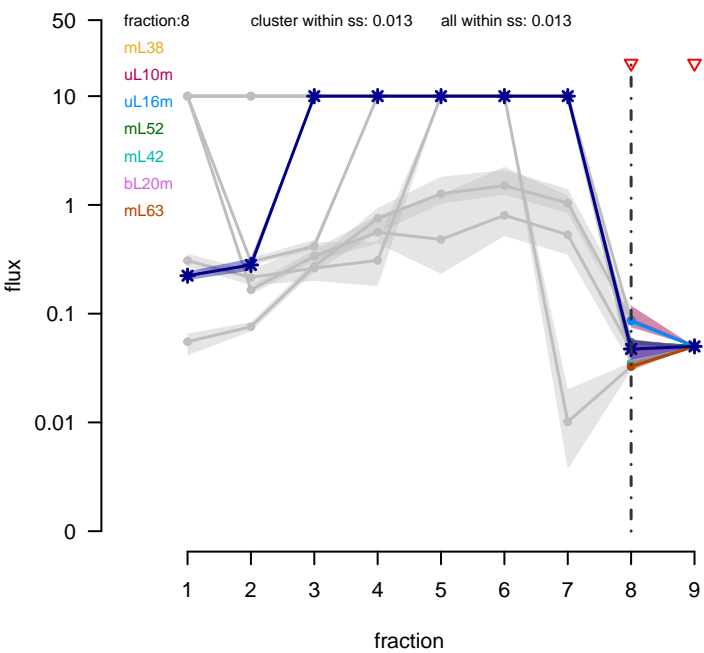**uL30m**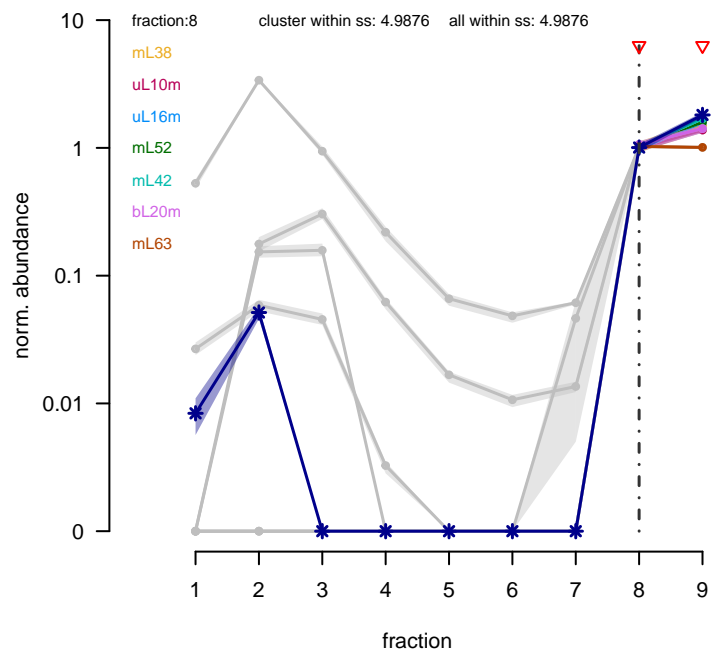**mL42**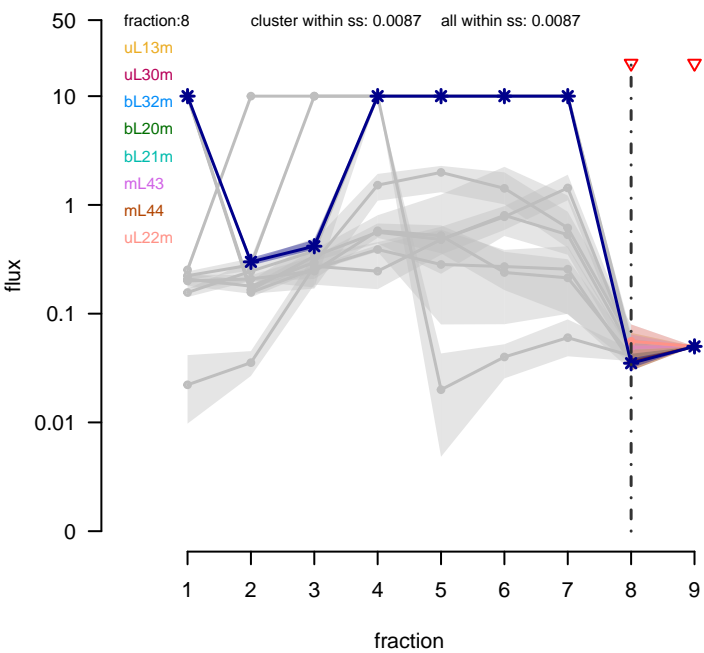**mL42**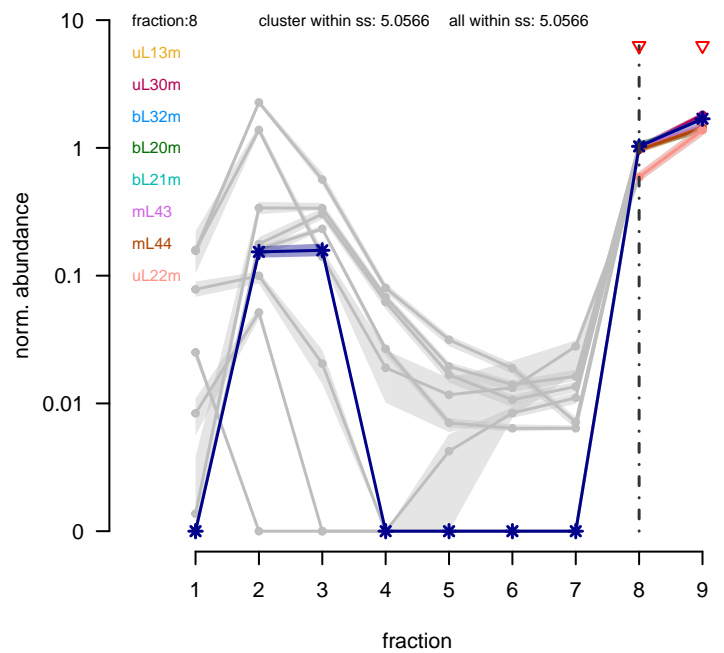



**uL2m**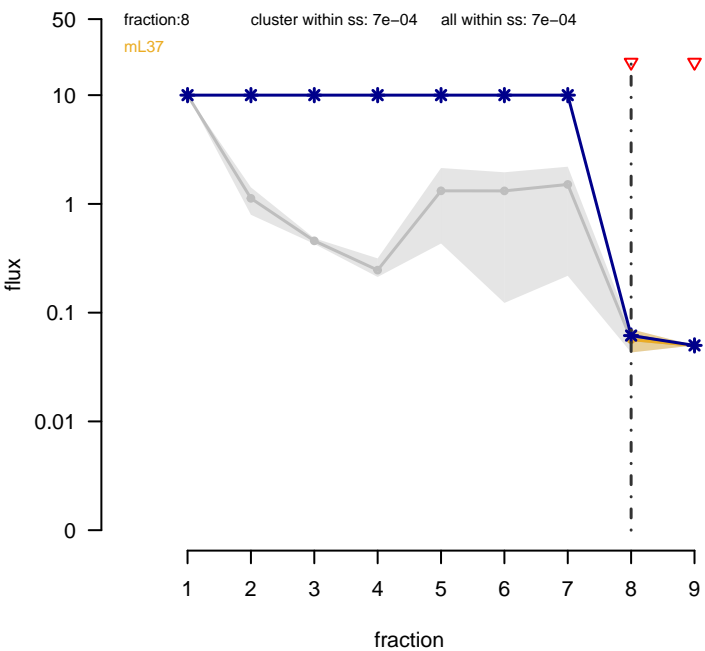**uL2m**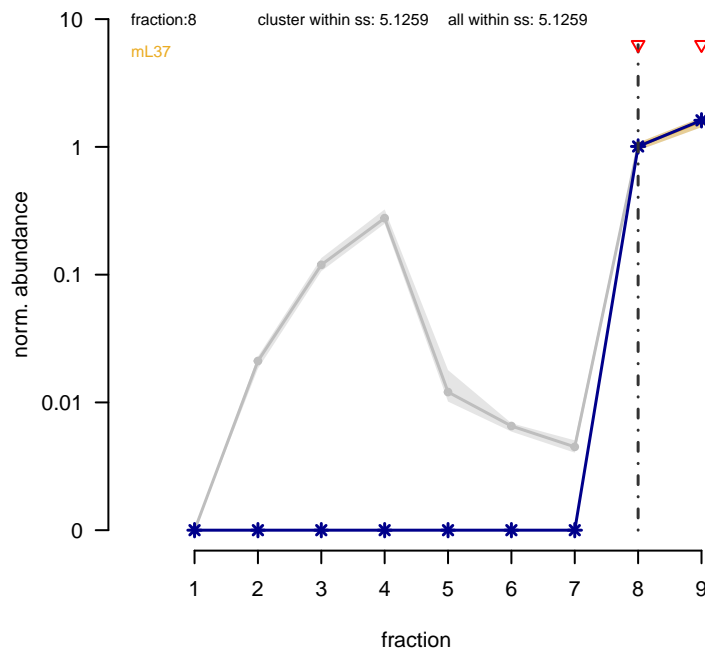**mL64**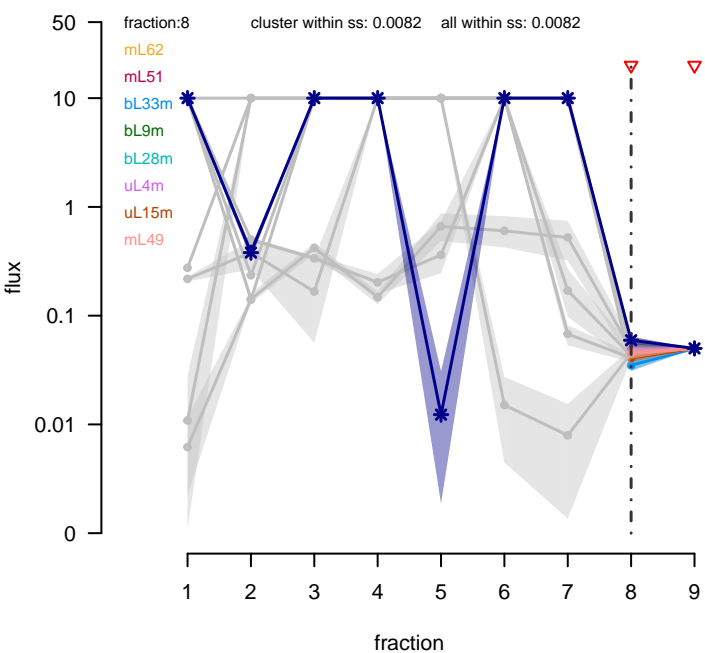**mL64**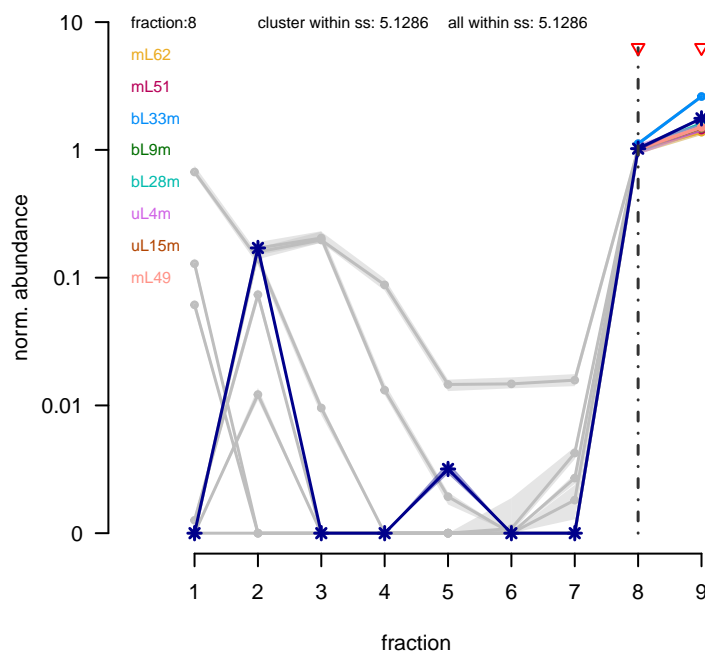**uL11m**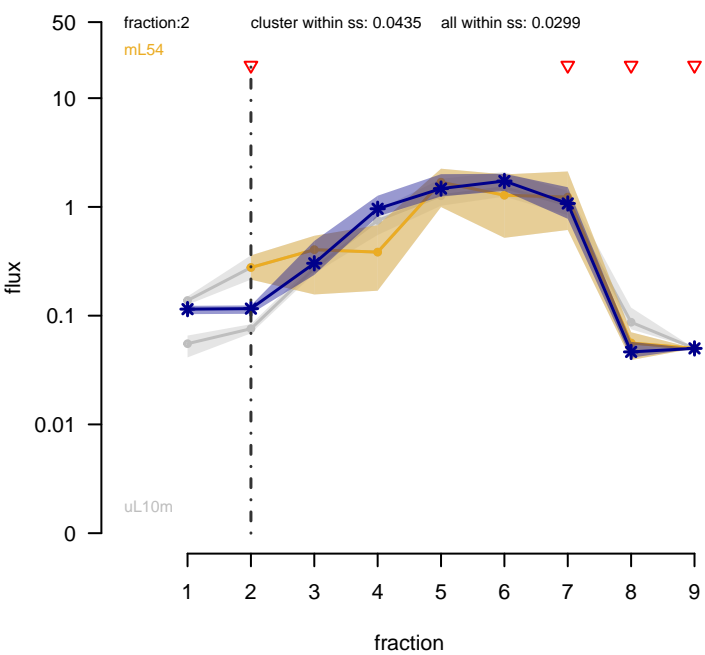**uL11m**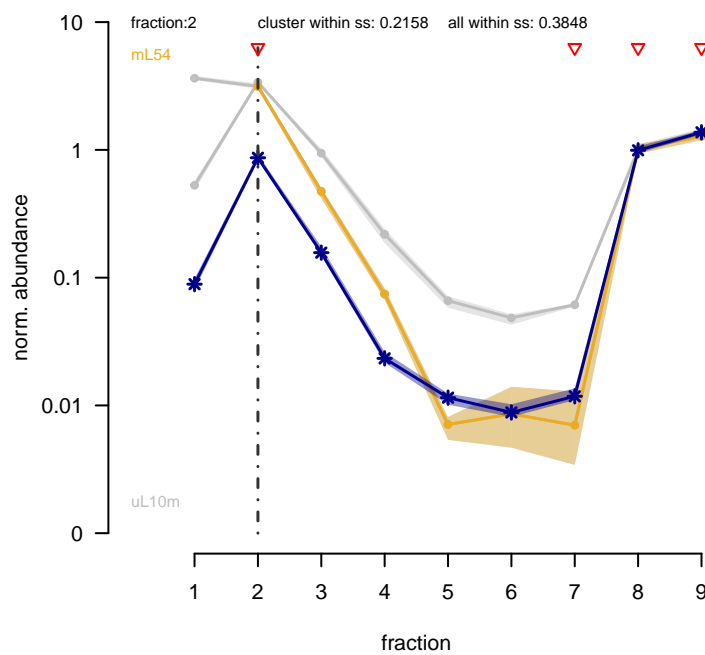

**mL54**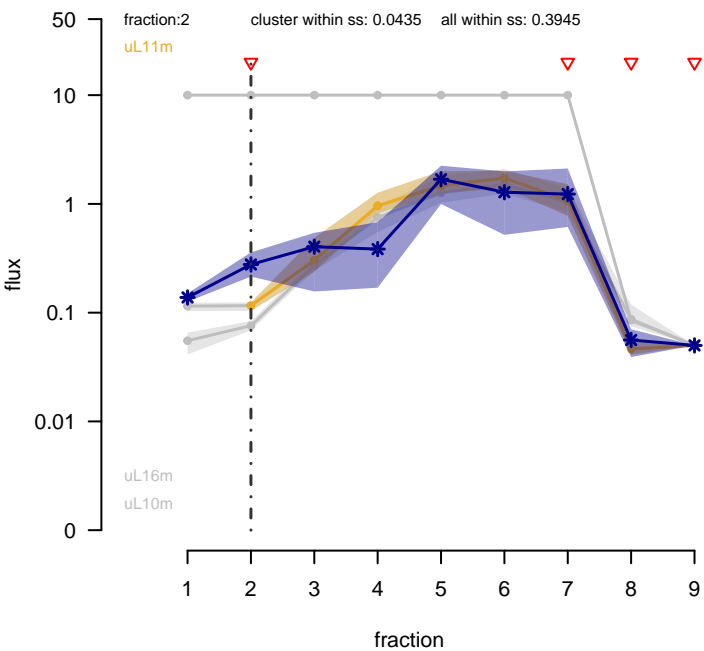**mL54**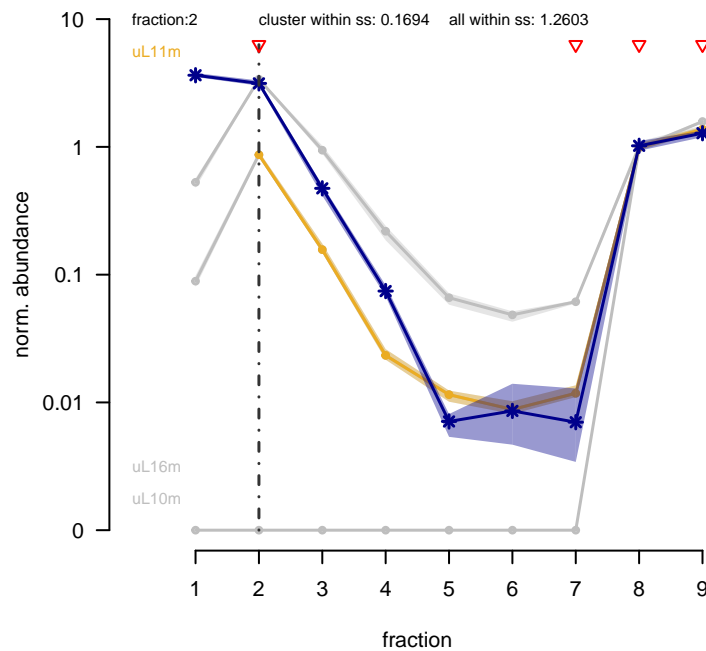**mL39**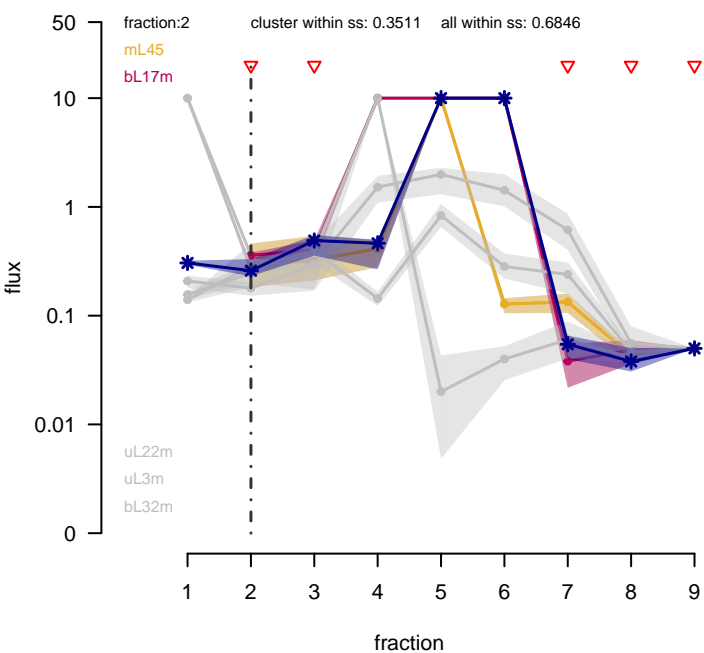**mL39**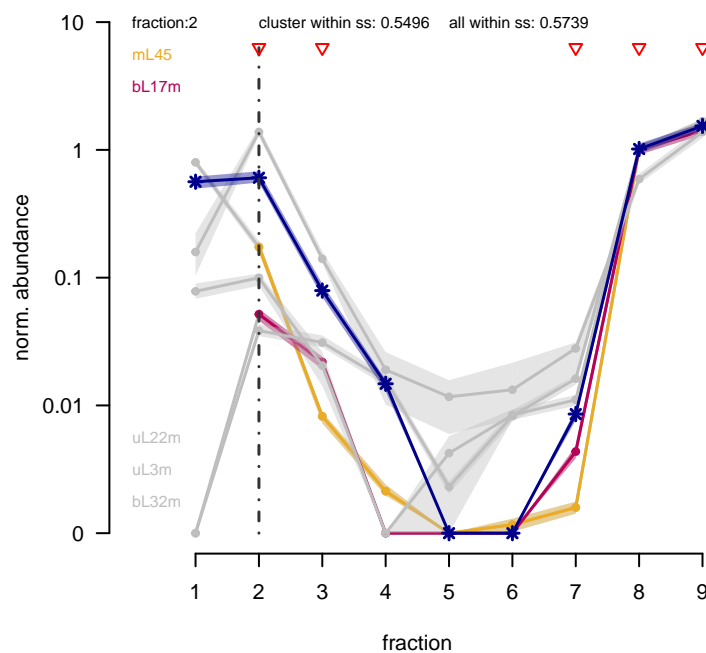**mL45**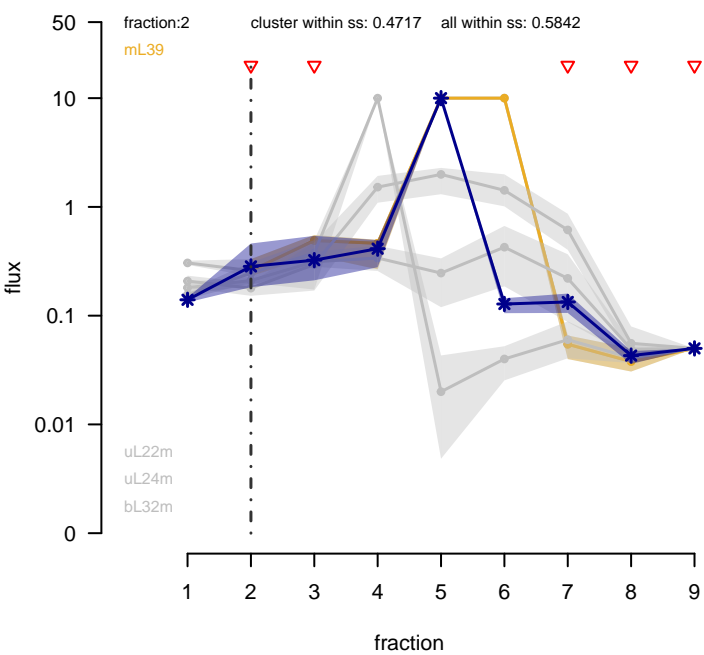**mL45**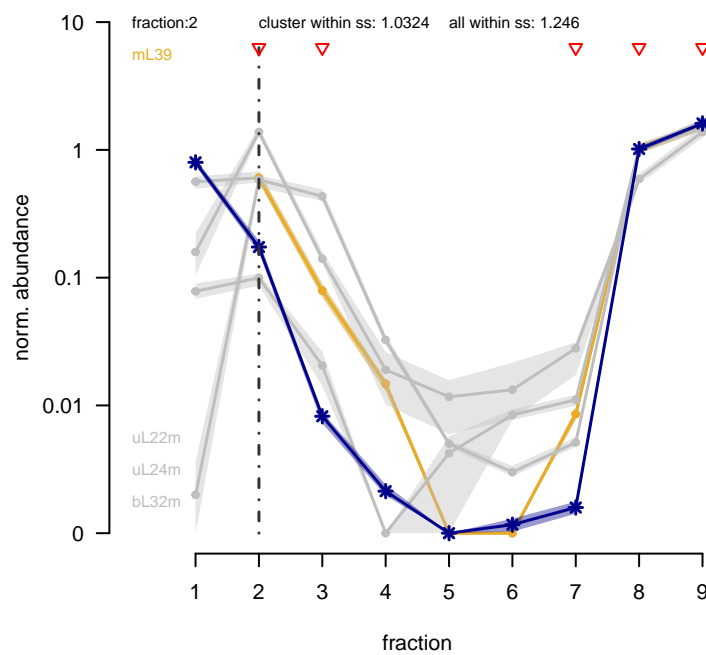

**bL19m**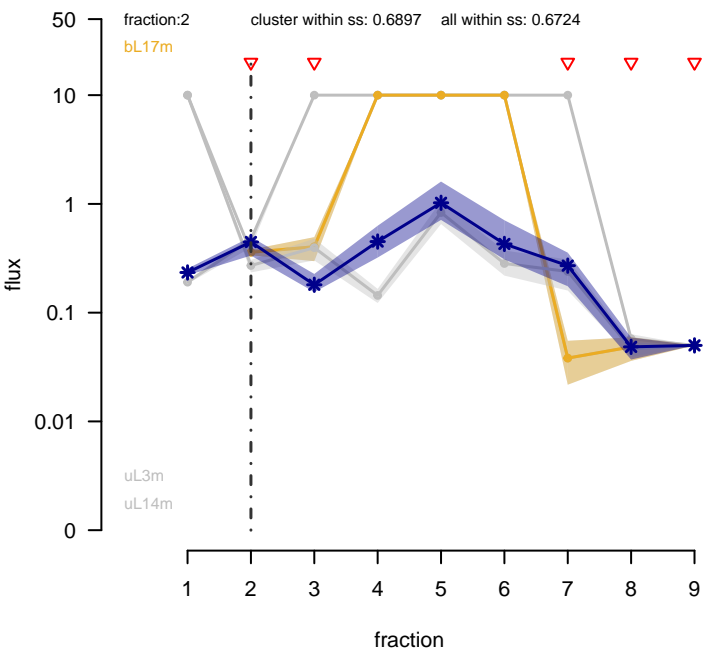**bL19m**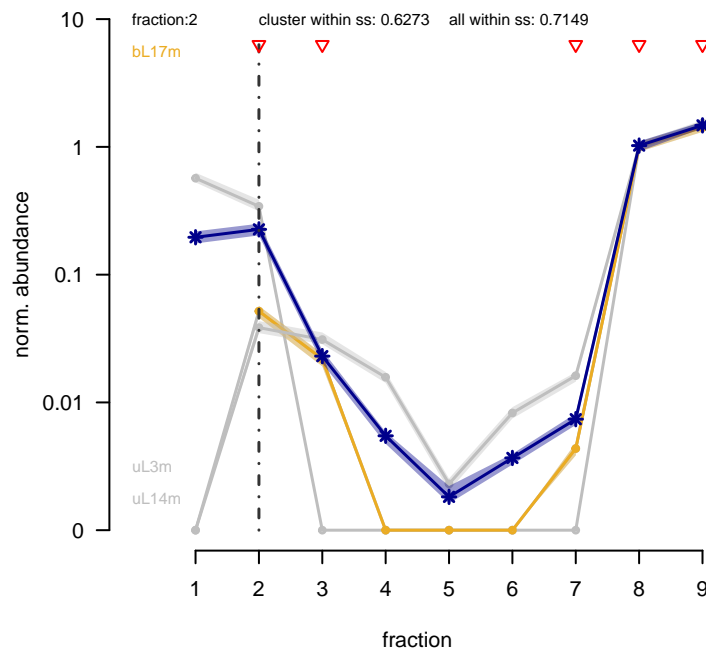**bL17m**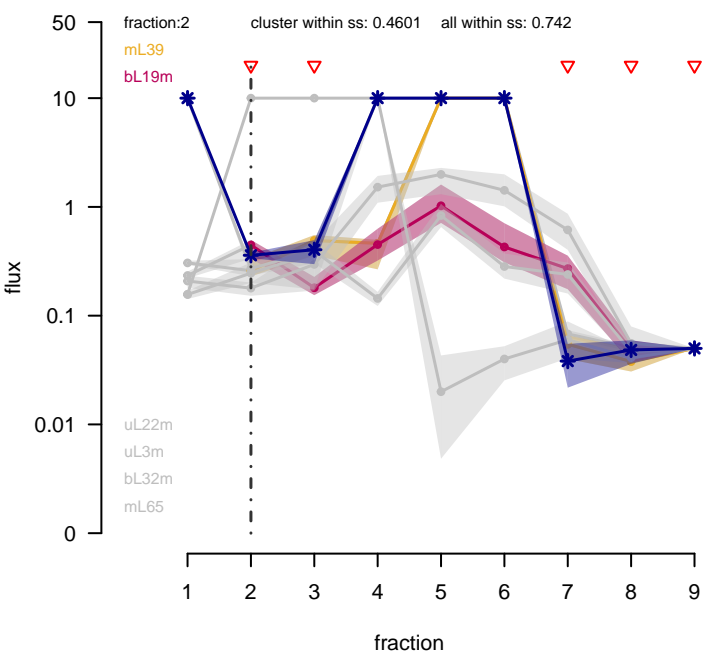**bL17m**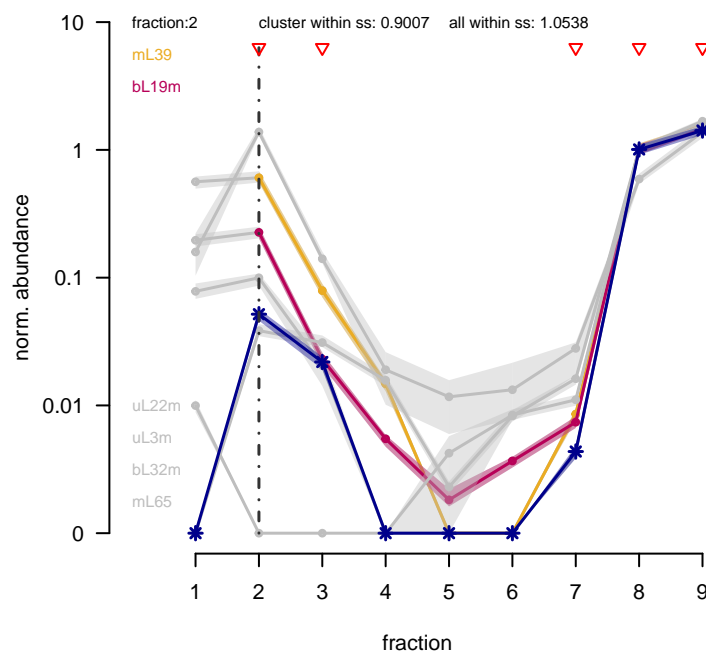**bL32m**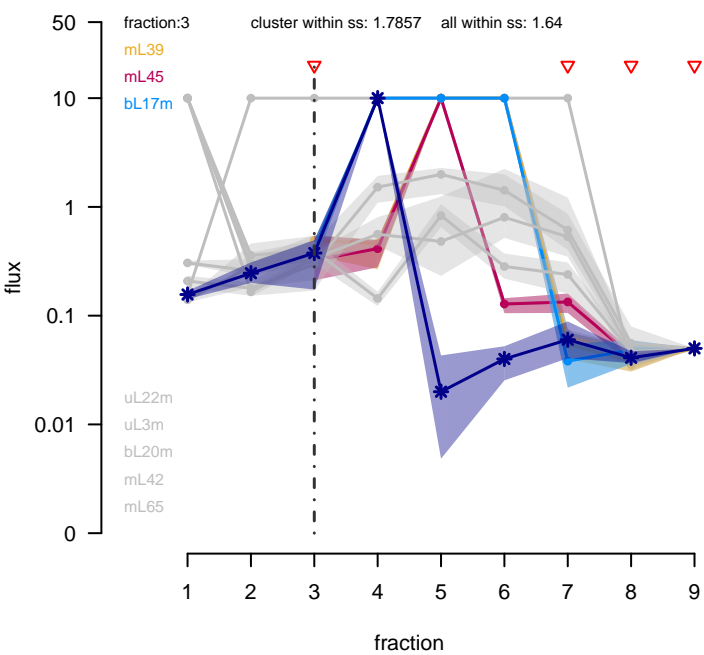**bL32m**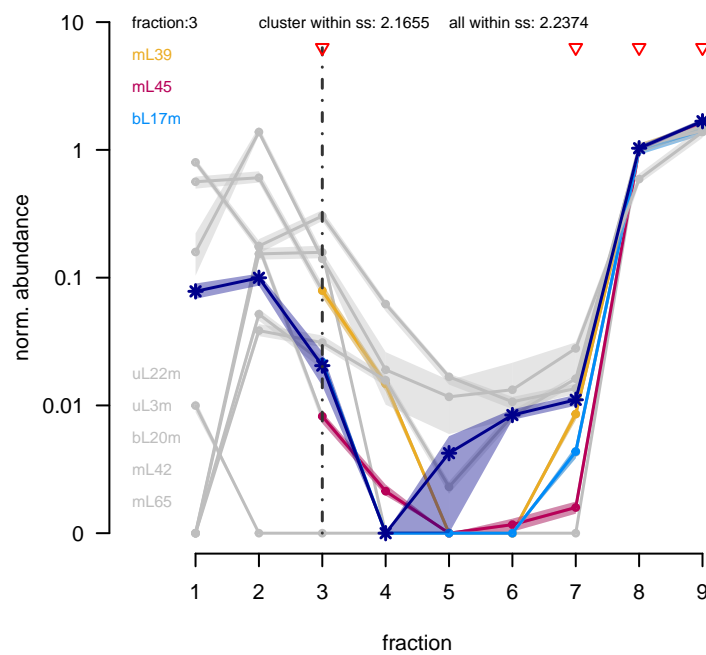

### uL24m

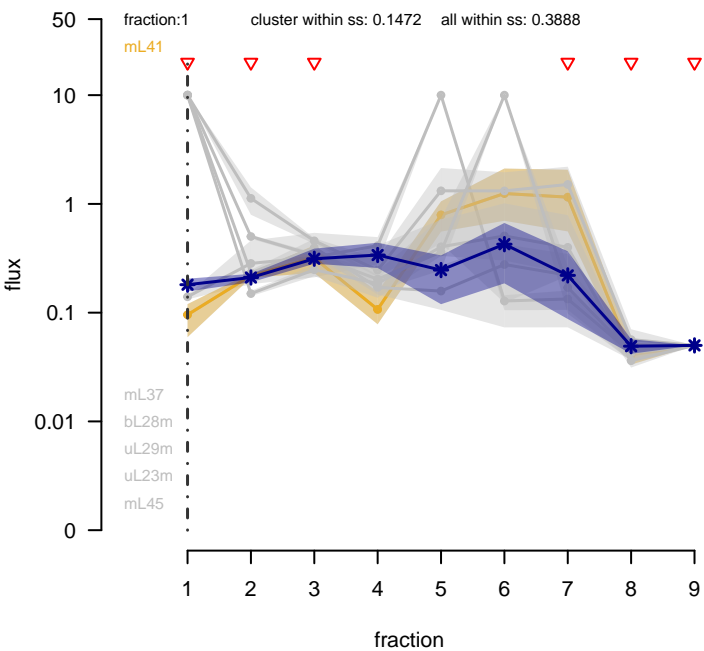

### uL24m

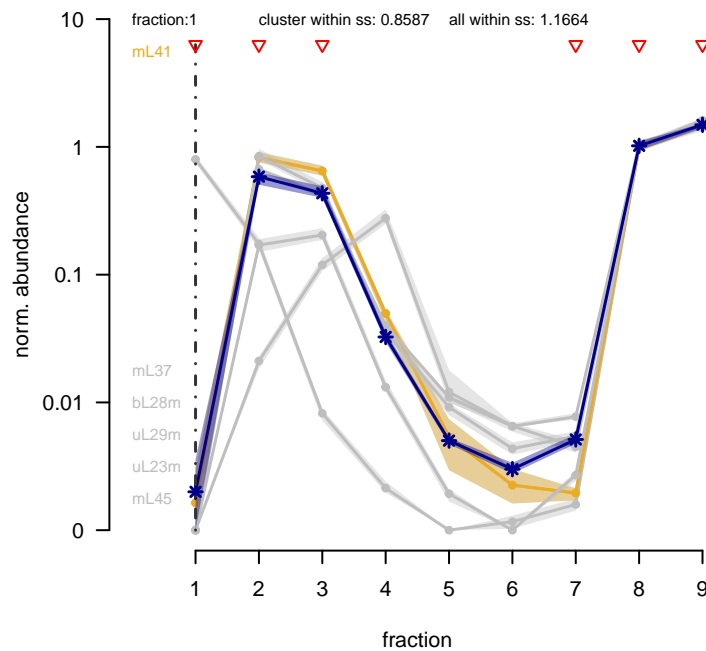

### mL41

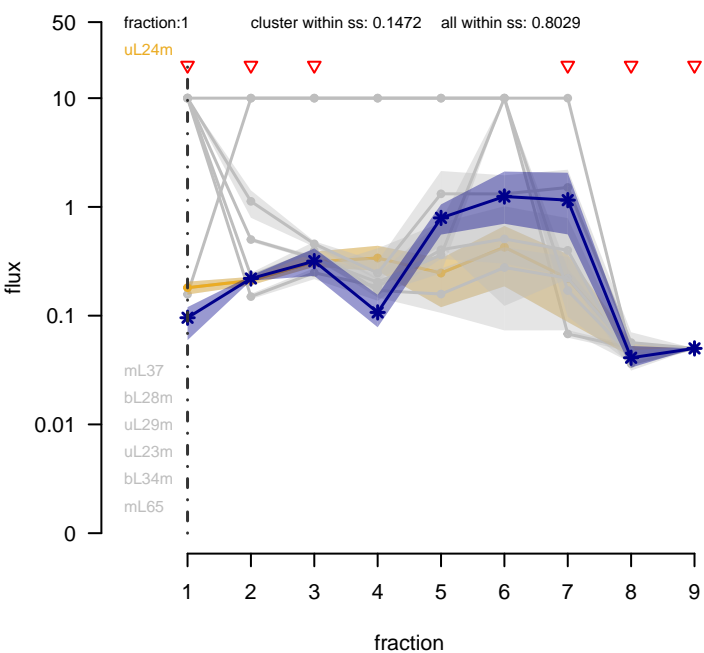

### mL41

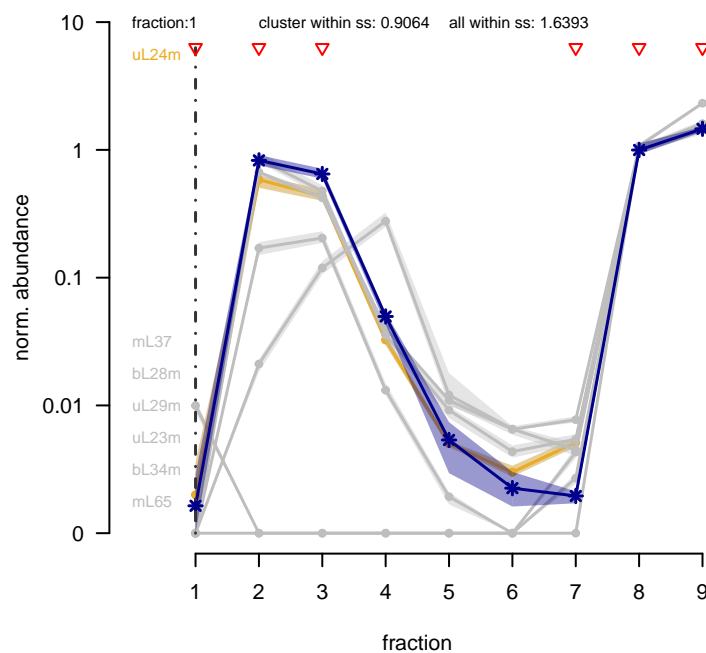

### uL23m

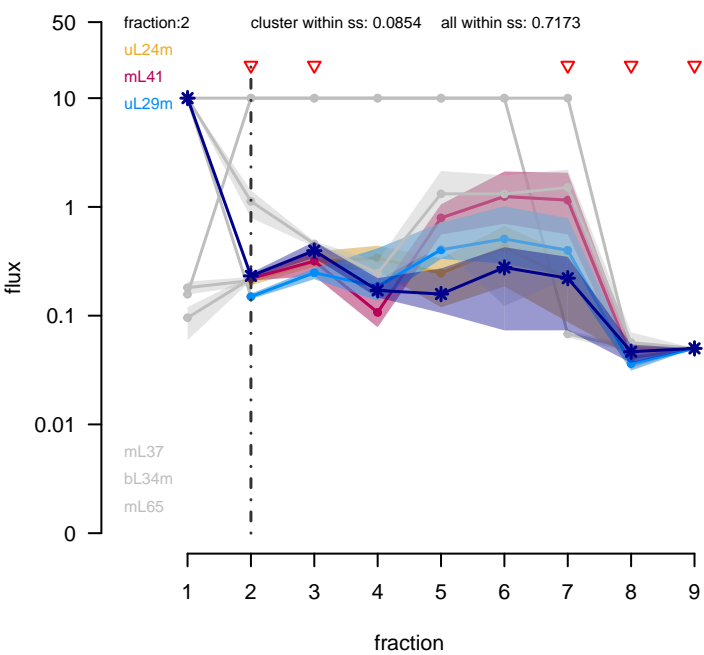

### uL23m

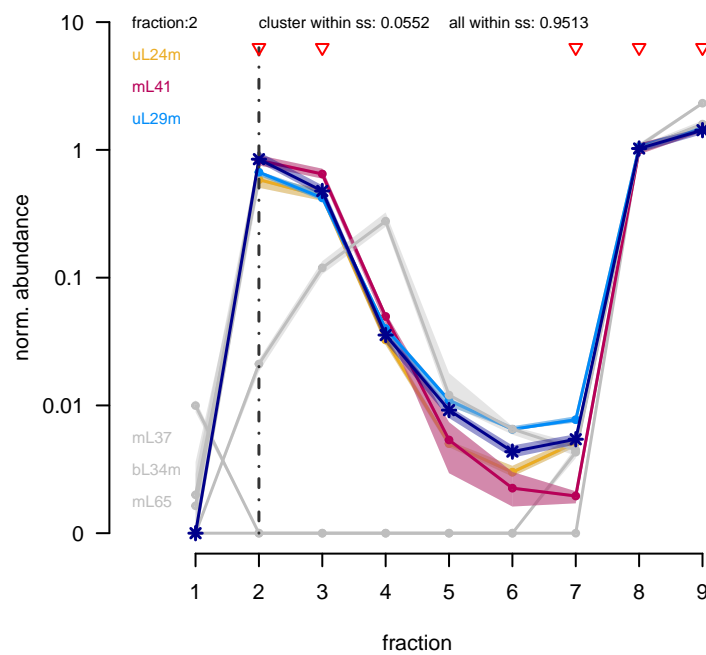

**uL29m**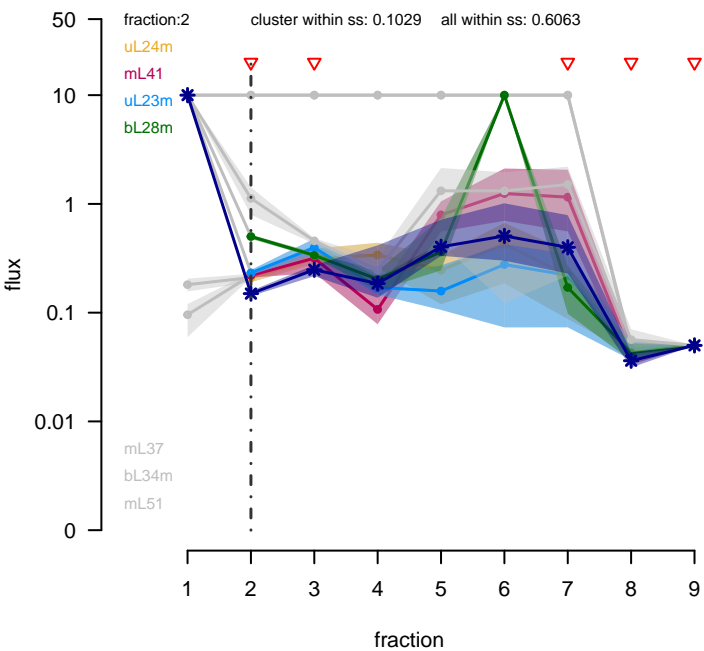**uL29m**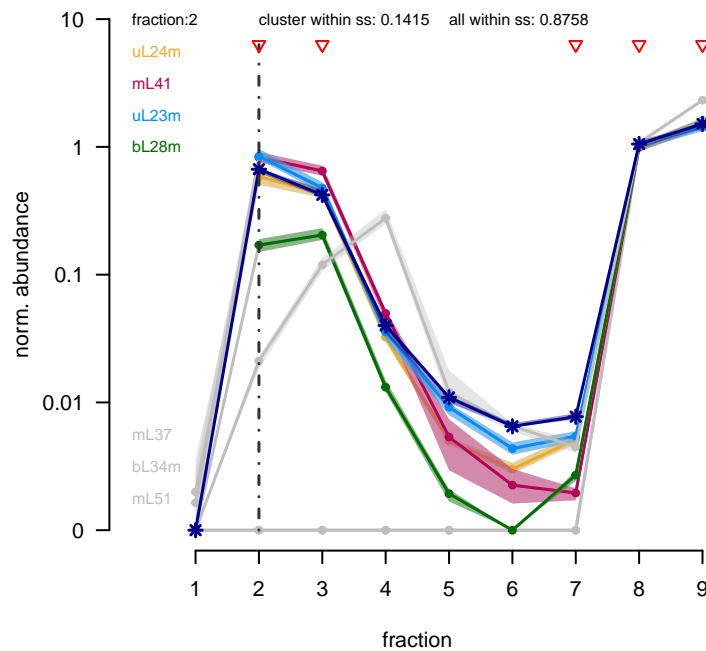**bL28m**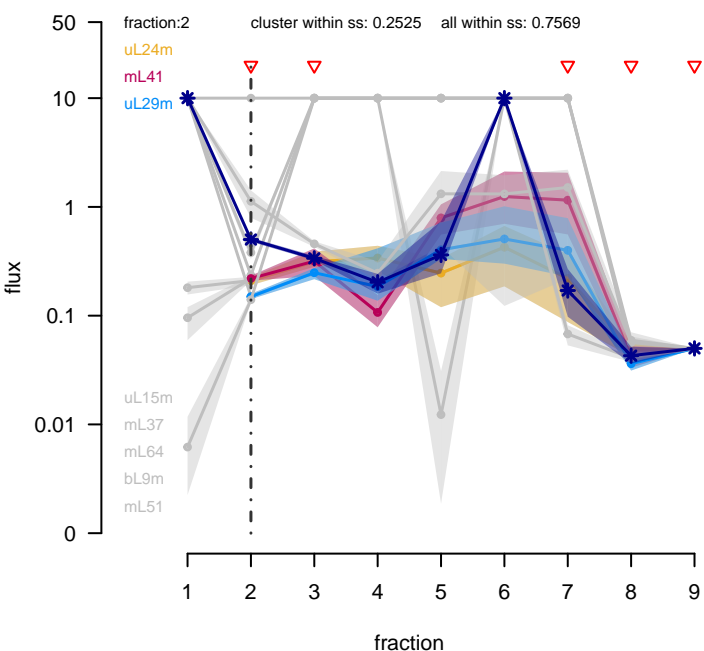**bL28m**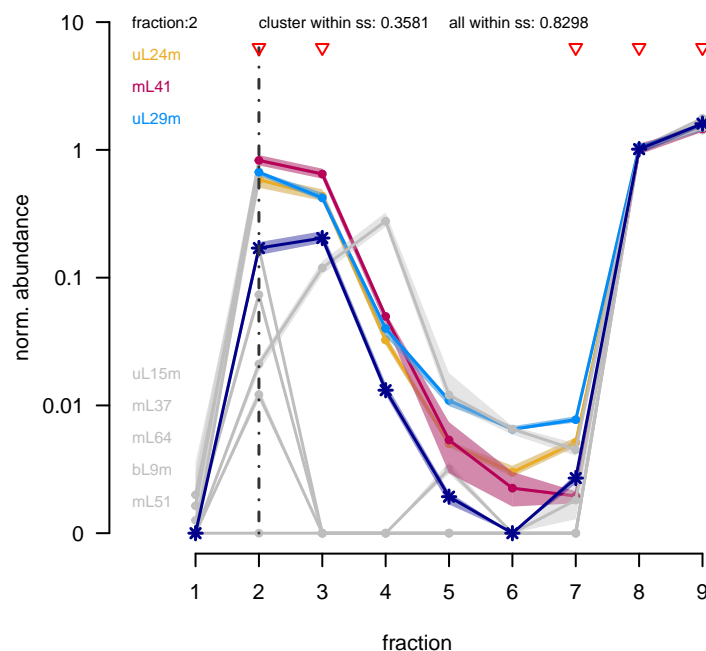**mL37**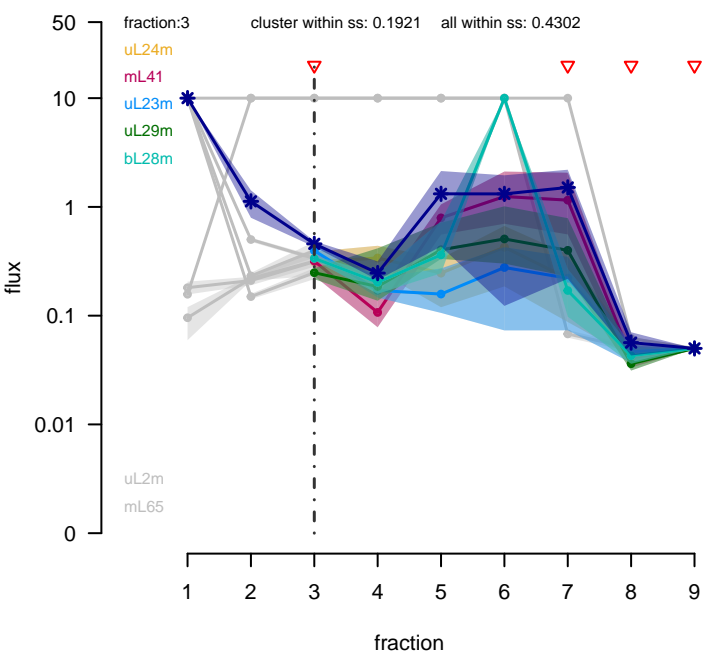**mL37**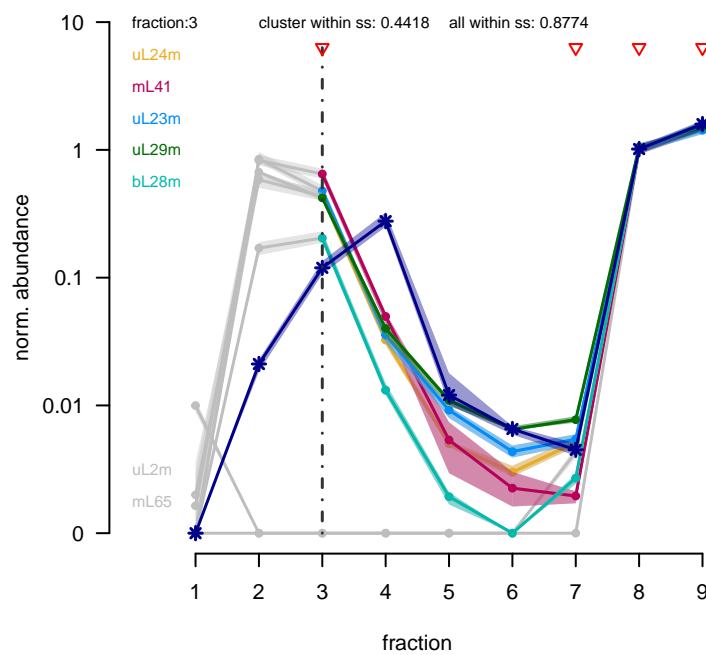

### uL4m

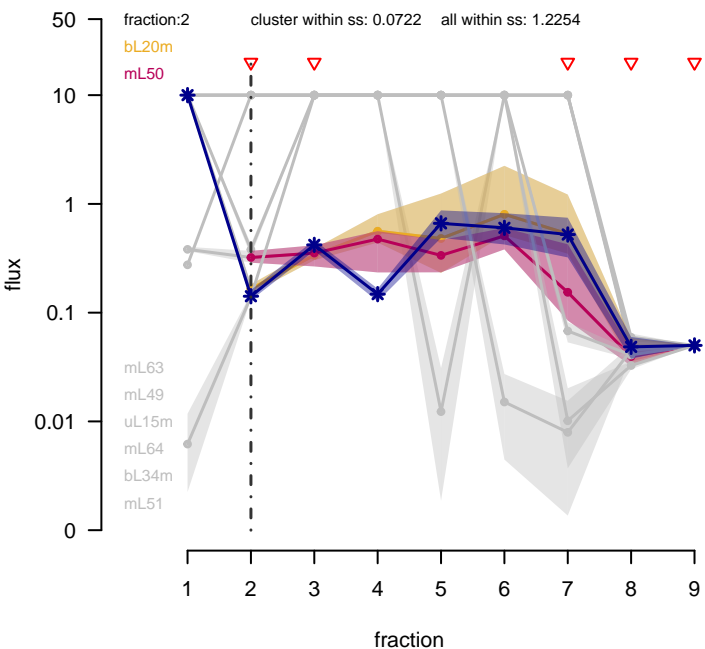

### uL4m

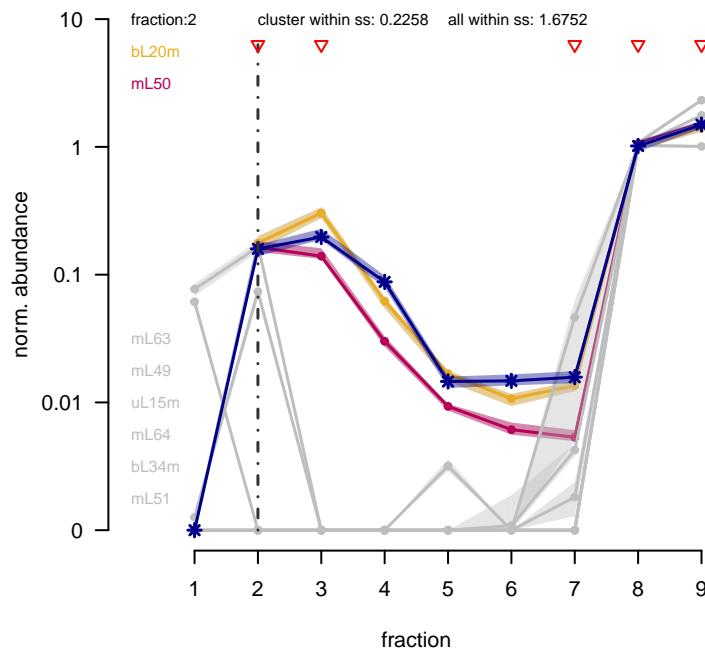

### bL20m

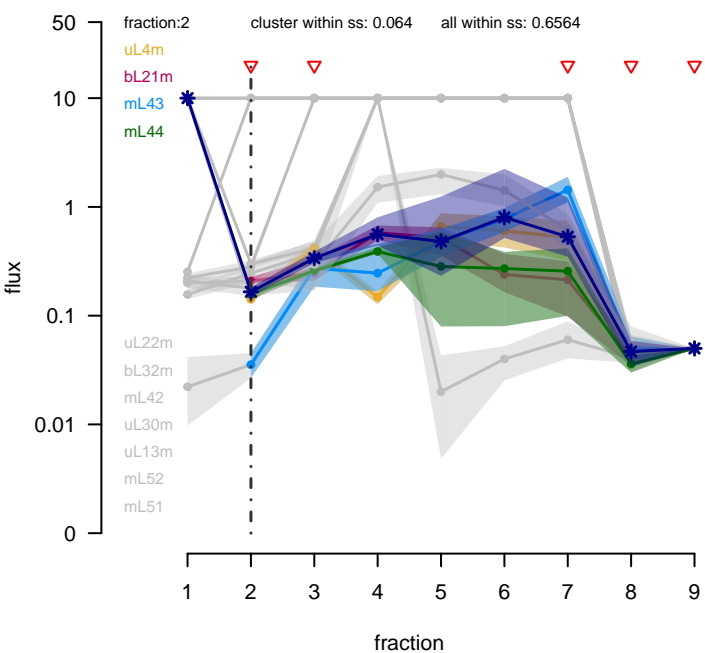

### bL20m

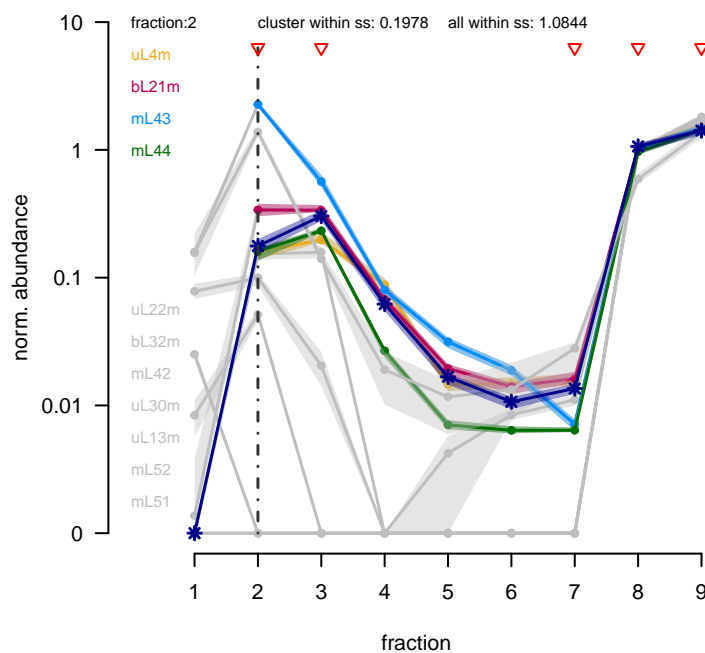

### mL50

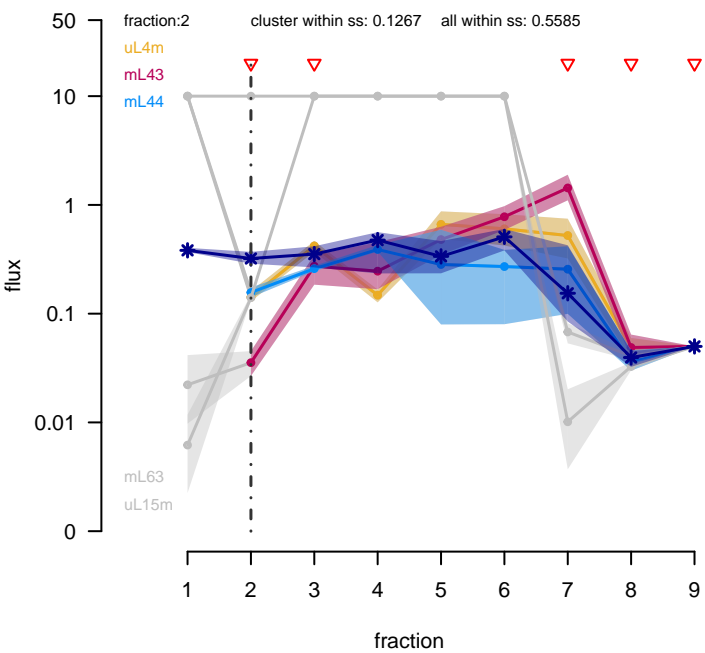

### mL50

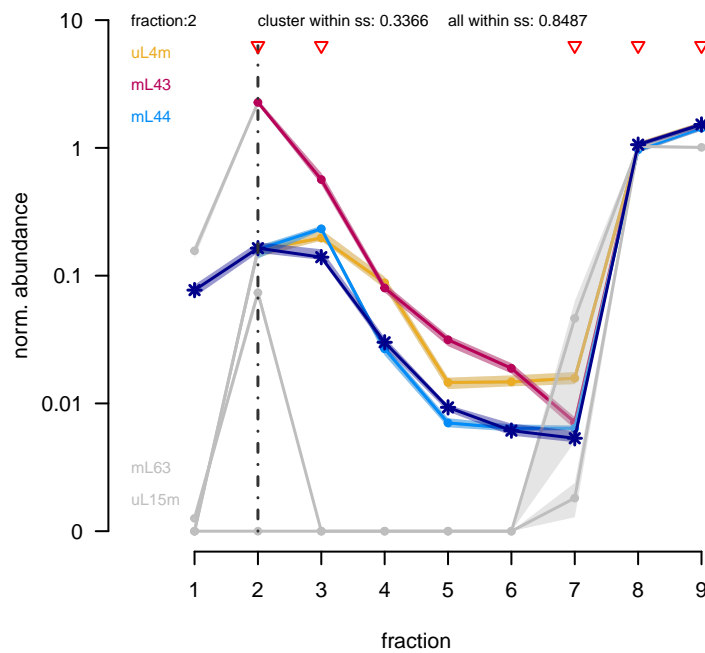

### bL21m

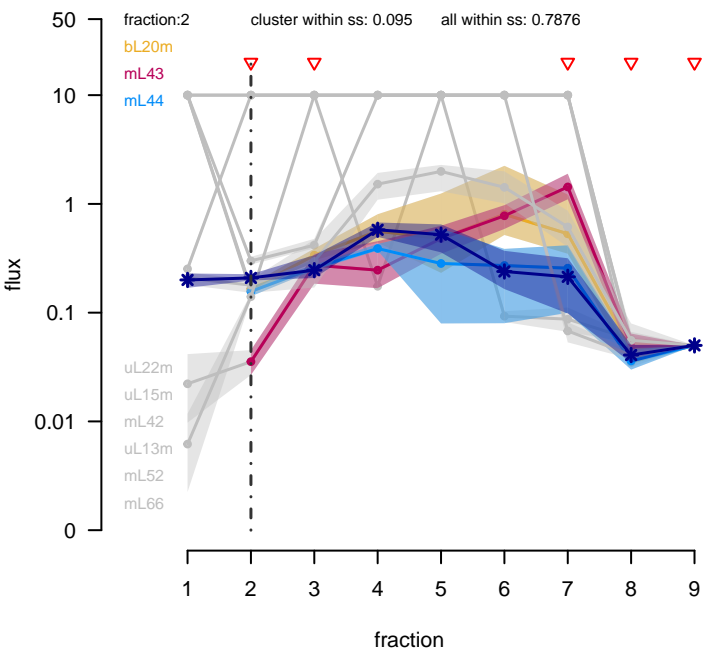

### bL21m

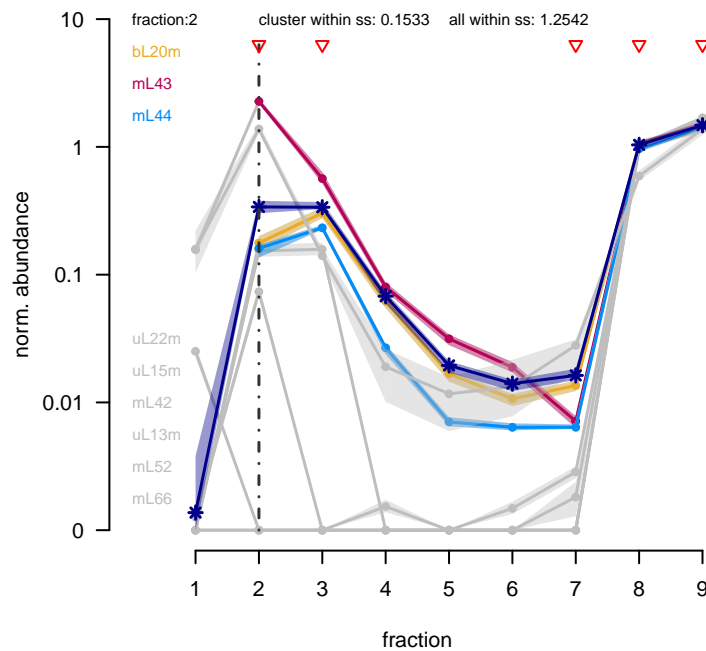

### mL43

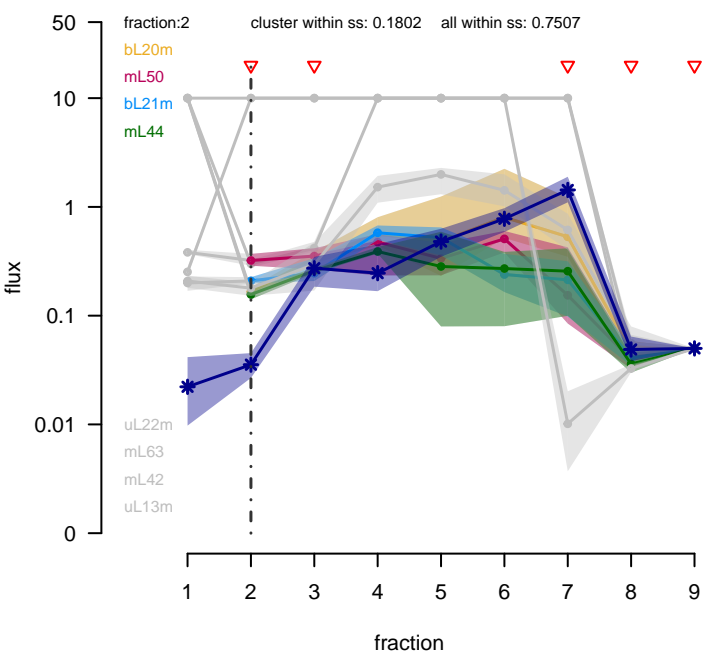

### mL43

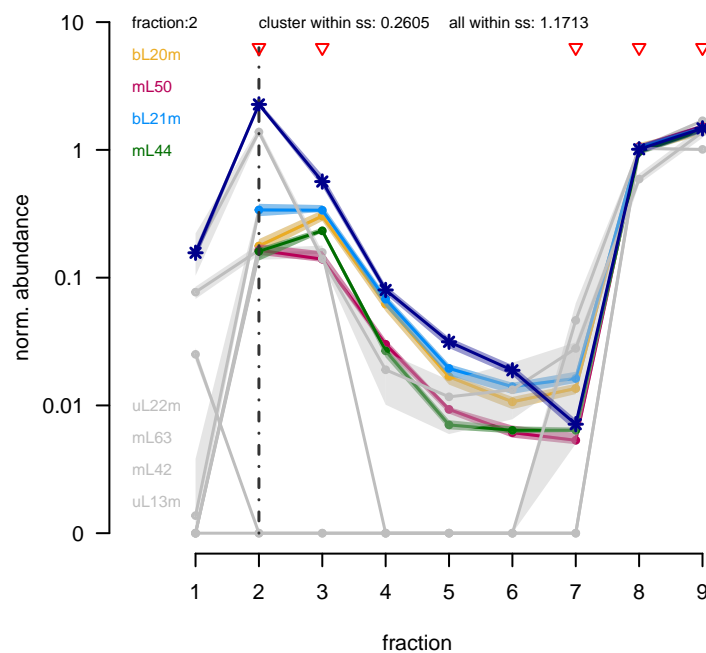

### mL44

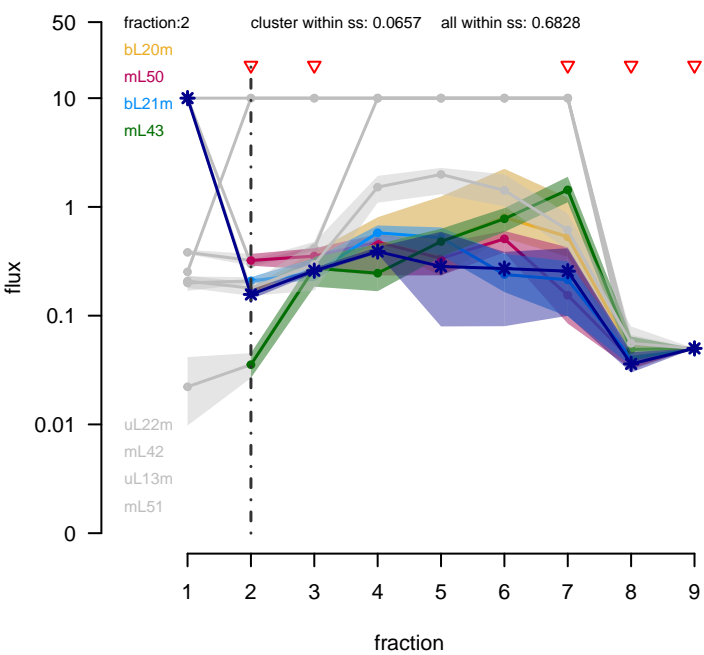

### mL44

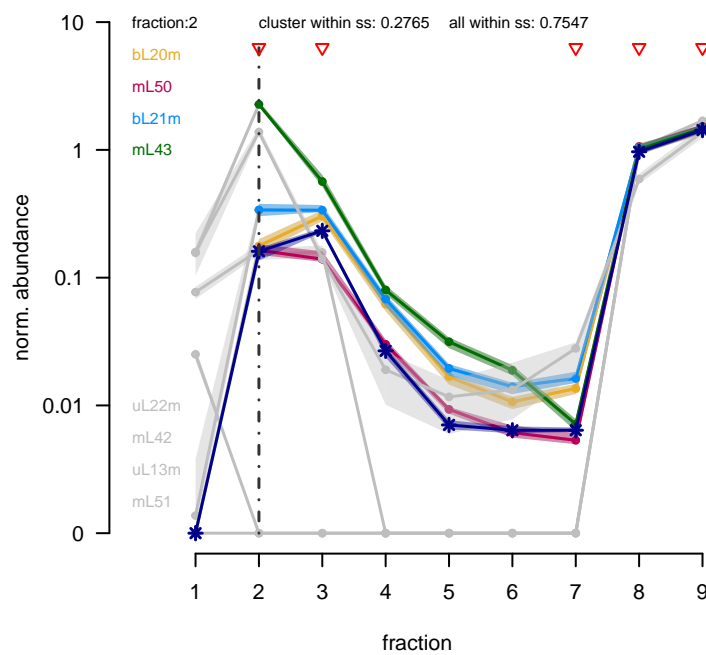

### uL15m

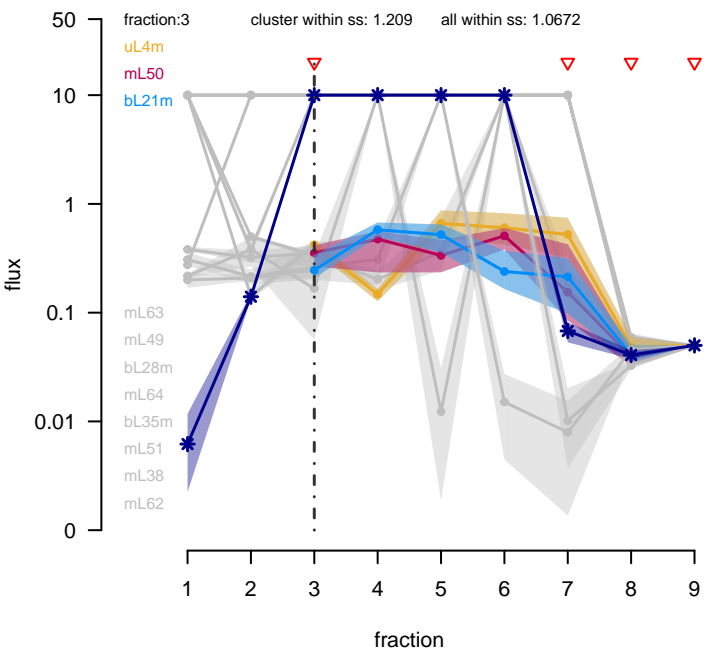

### uL15m

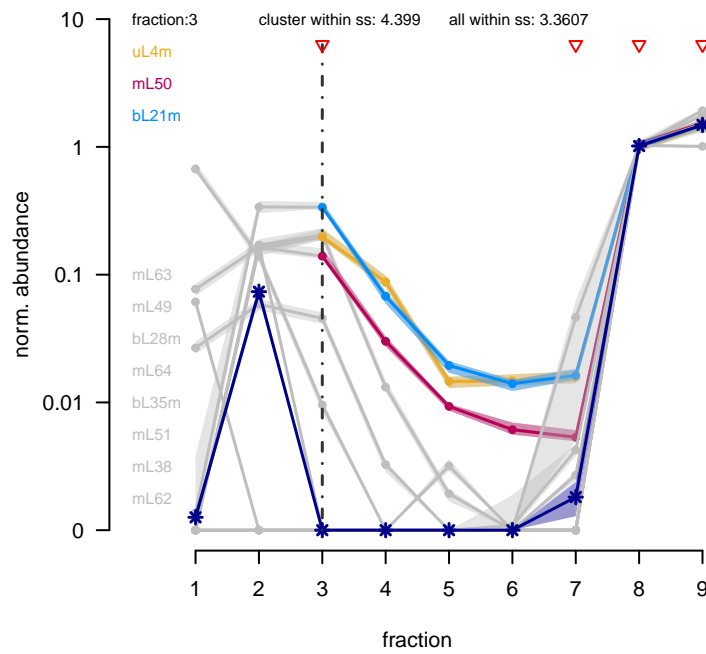

### mL49

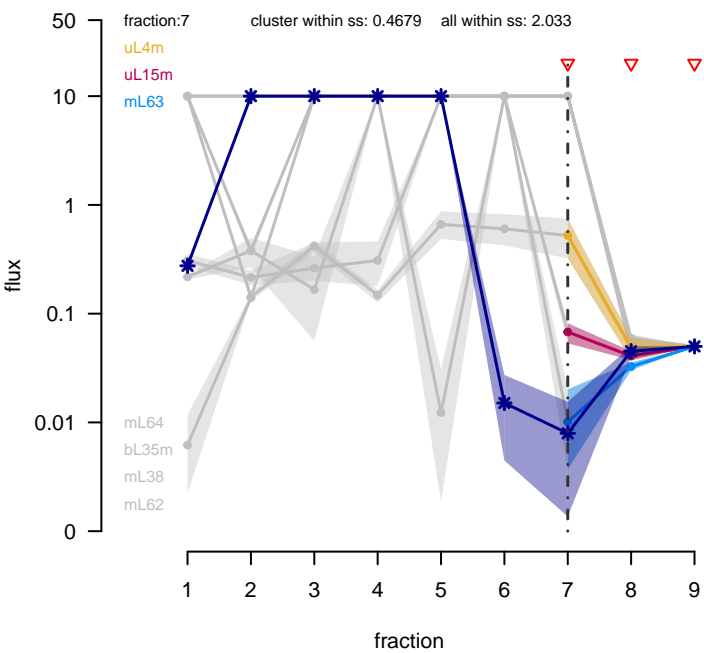

### mL49

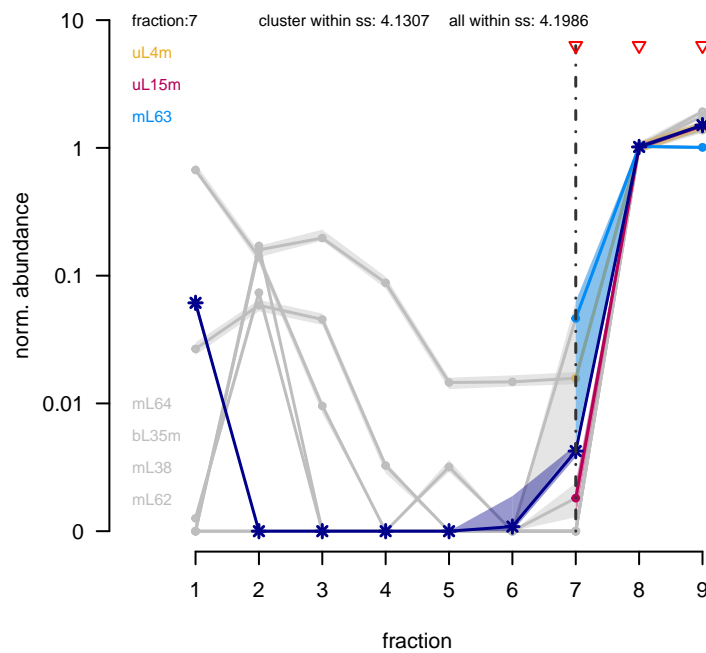

### mL63

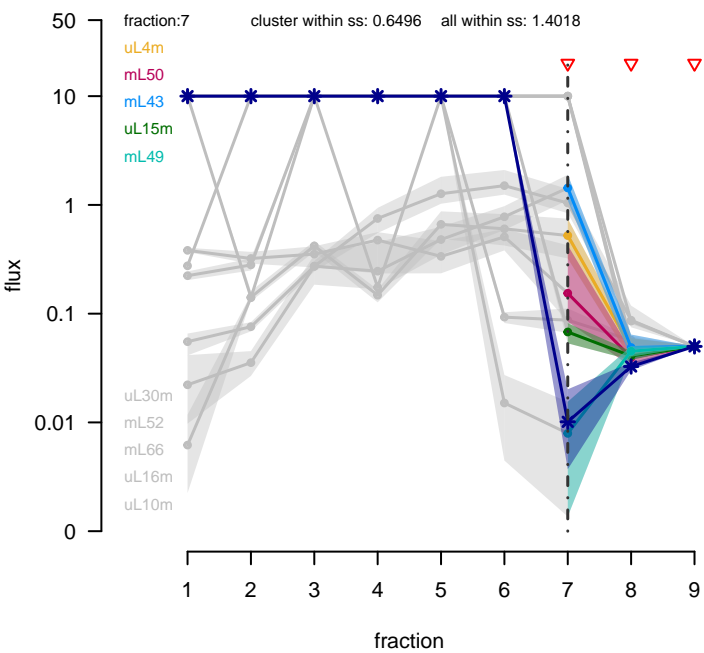

### mL63

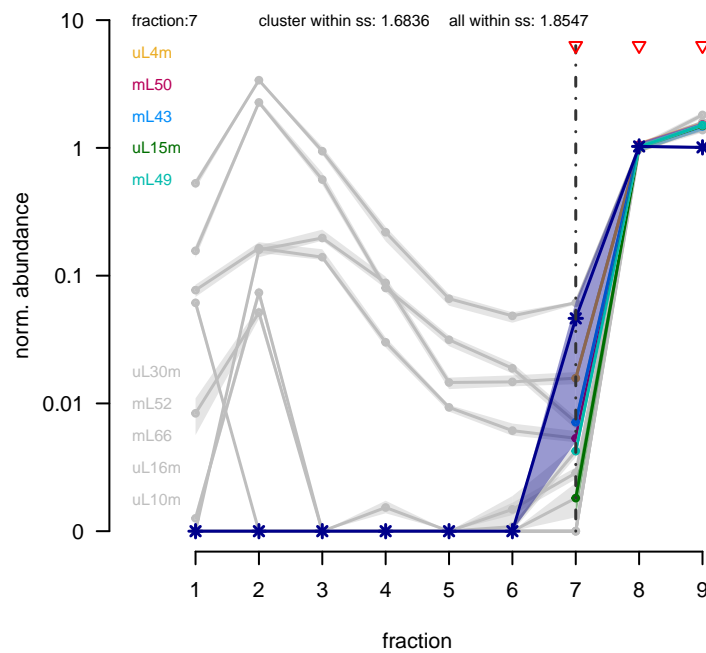



**uL3m**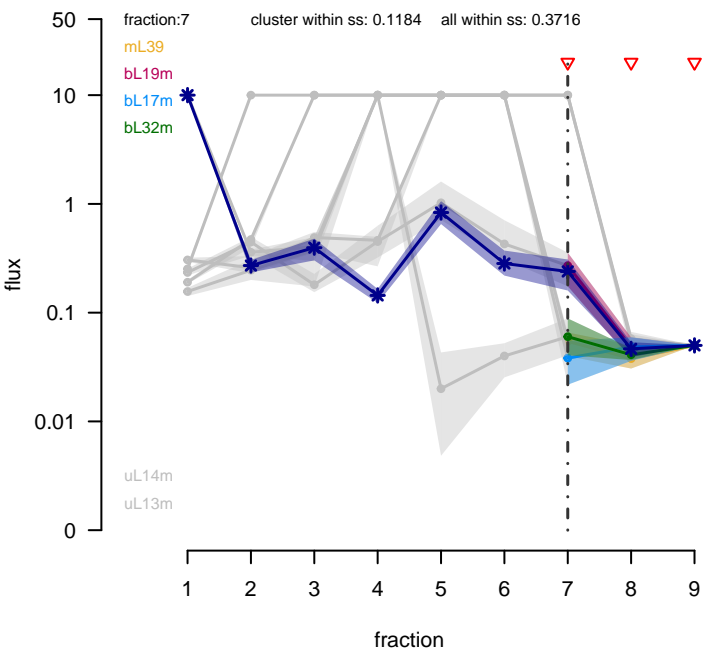**uL3m**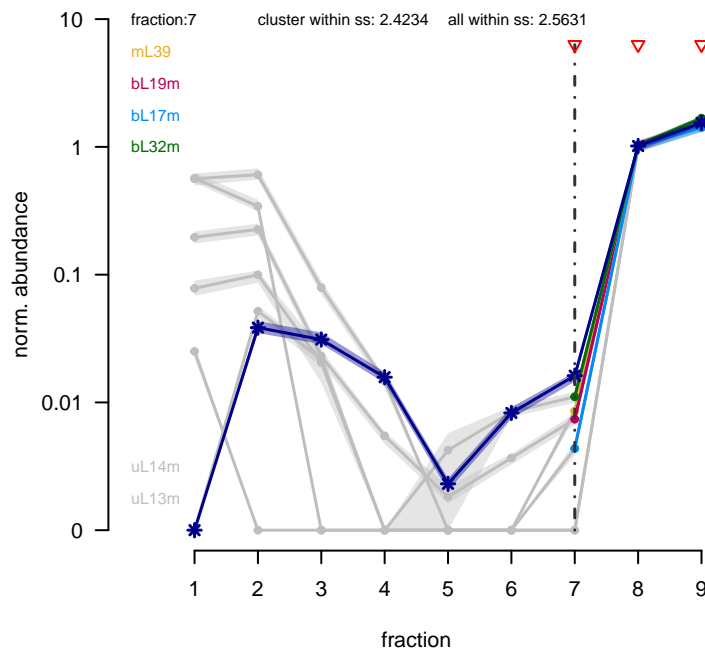**uL22m**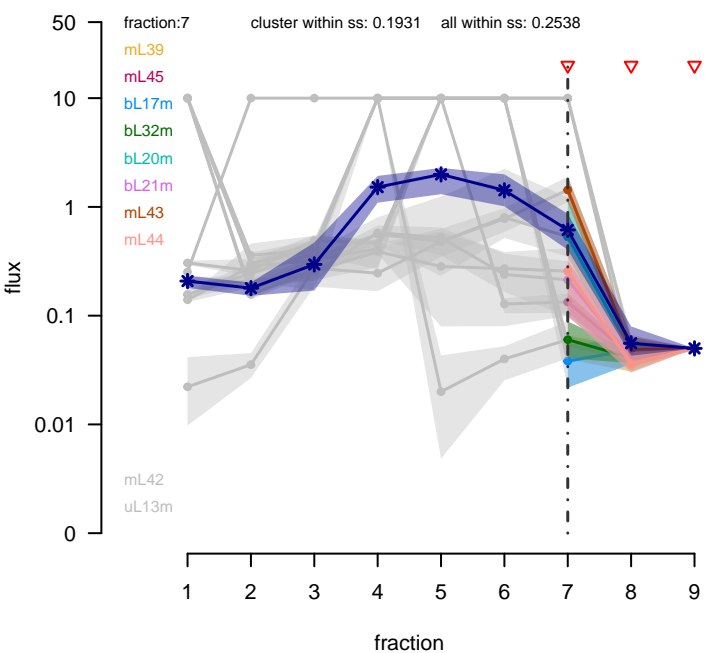**uL22m**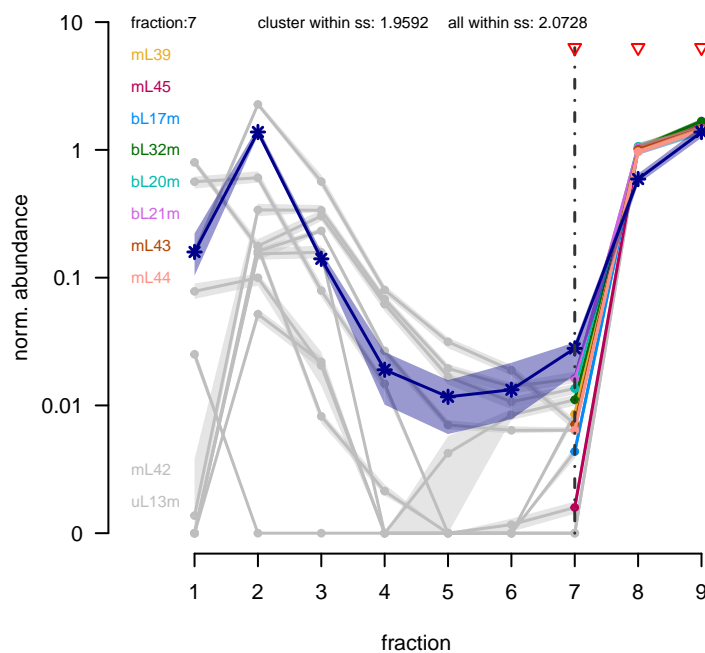

Supplement: 41594_2024_1356_MOESM12_ESM.pdf [file 41594_2024_1356_MOESM12_ESM.pdf]
