# Supplementary material for: A roadmap for ribosome assembly in human mitochondria
Source: PubMed Central journal article supplement (PMC11638073; doi:10.1038/s41594-024-01356-w), 2024-07-11

Source Data 1\_related to Main Fig.4a

EL#398 WT Gradient + RNA isolation

Rotor: SW41 Ti

Gradient: Sucrose 5-30%

Speed: 158.000xg

Time: 15h

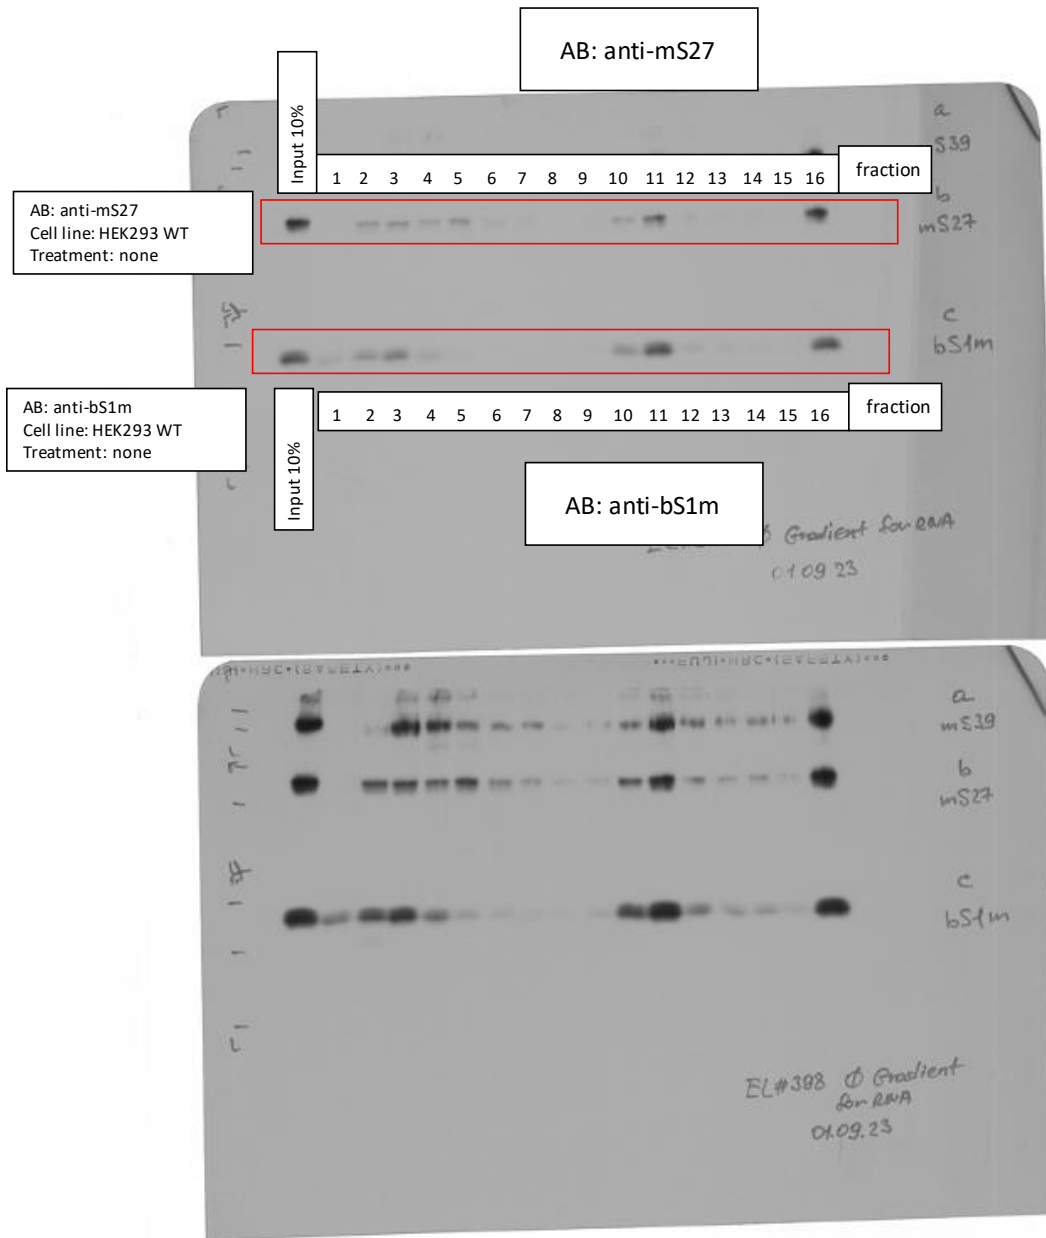

Source Data 1\_related to Main Fig.4a

EL#398 WT Gradient + RNA isolation

Rotor: SW41 Ti

Gradient: Sucrose 5-30%

Speed: 158.000xg

Time: 15h

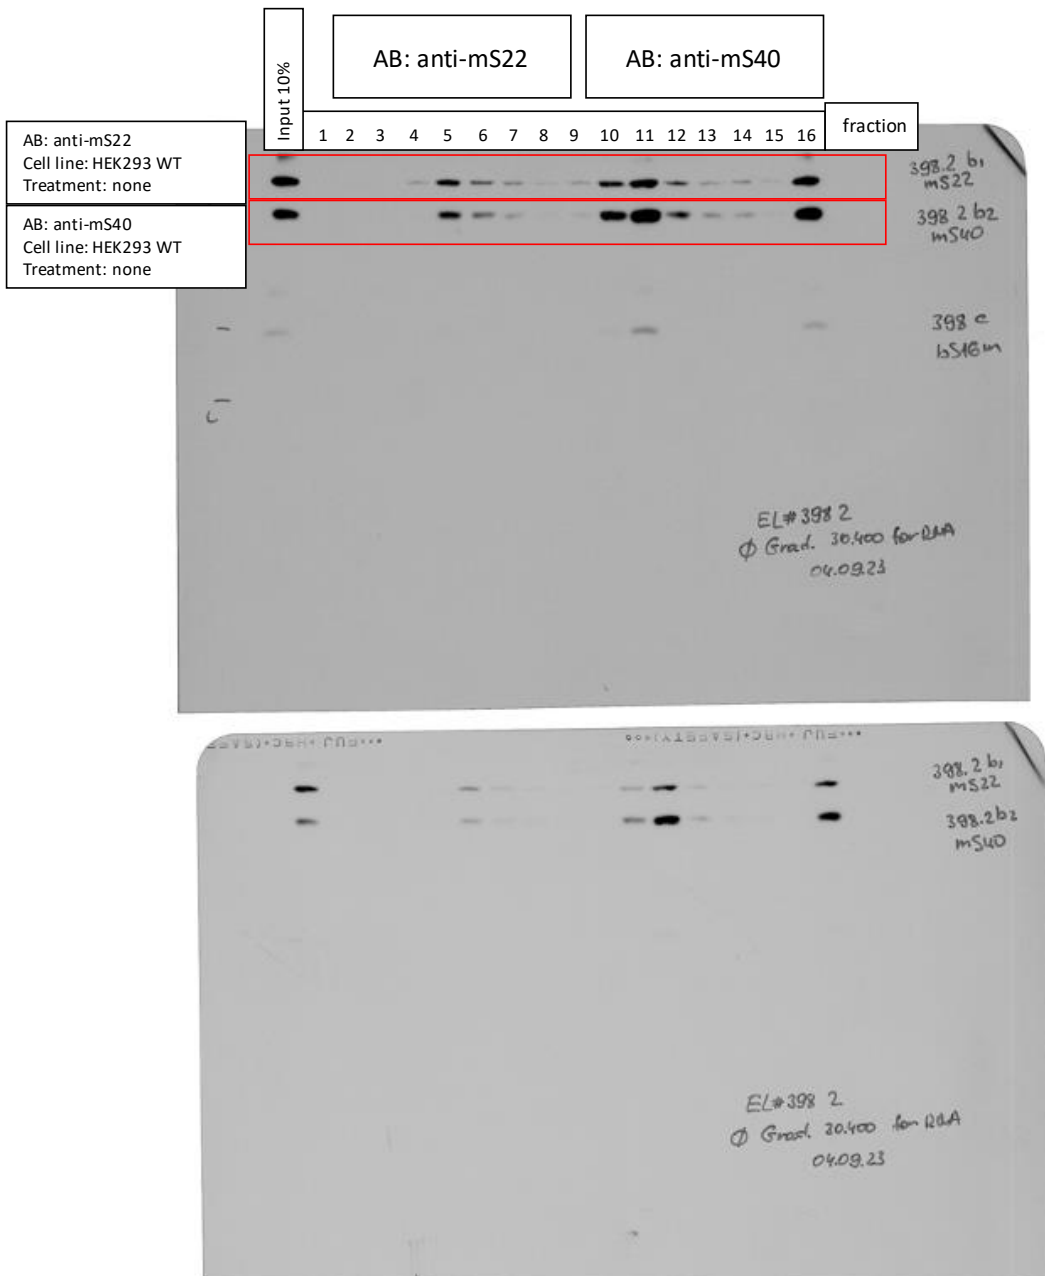

Source Data 1\_related to Main Fig.4a

EL#398 WT Gradient + RNA isolation

Rotor: SW41 Ti

Gradient: Sucrose 5-30%

Speed: 158.000xg

Time: 15h

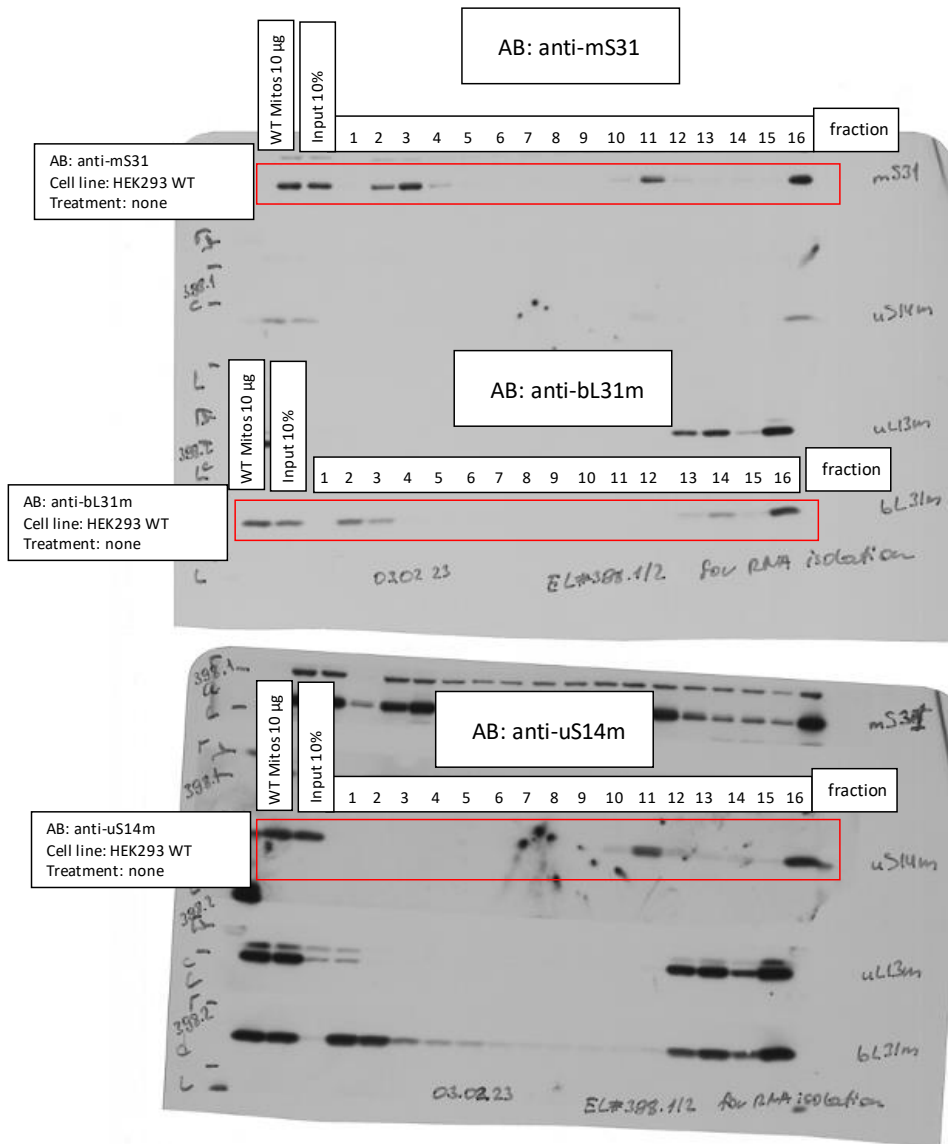

Source Data 1\_related to Main Fig.4a

EL#398 WT Gradient + RNA isolation

Rotor: SW41 Ti

Gradient: Sucrose 5-30%

Speed: 158.000xg

Time: 15h

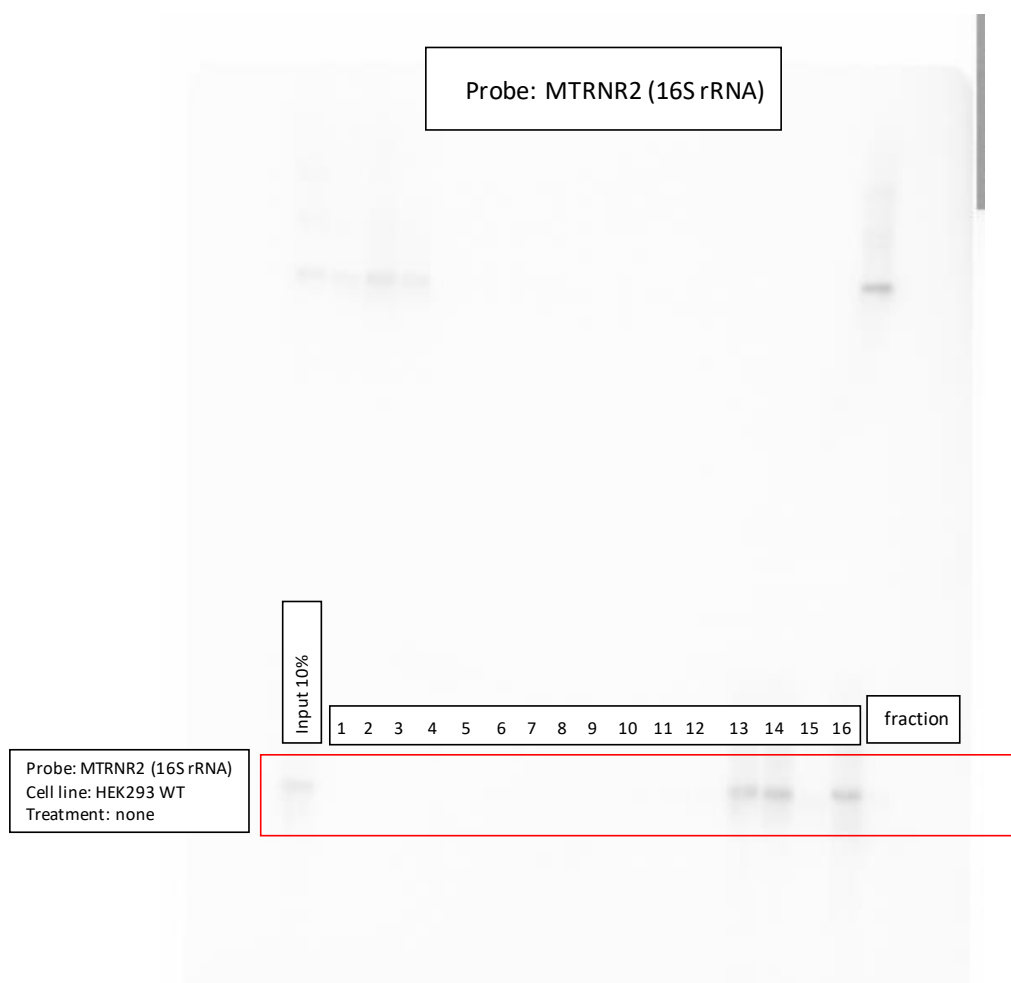

Source Data 1\_related to Main Fig.4a  
EL#398 WT Gradient + RNA isolation  
Rotor: SW41 Ti  
Gradient: Sucrose 5-30%  
Speed: 158.000xg  
Time: 15h

Probe: MTRNR1 (12S rRNA)

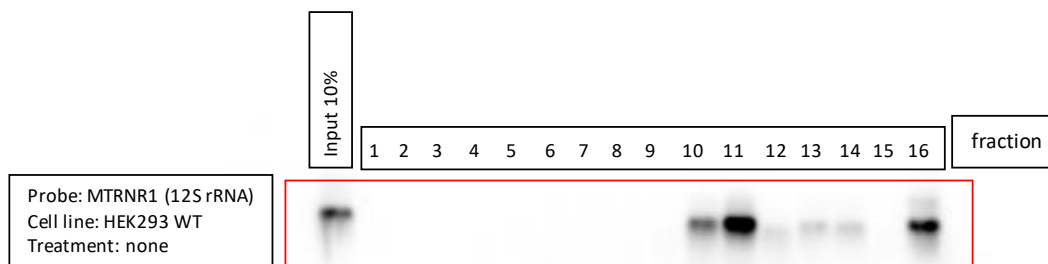

Source Data 1\_related to Main Fig.4d  
EL#450 bS1m-FLAG IP + EtBr treatment

Rotor: N/A  
Gradient: N/A  
Speed: N/A  
Time: N/A

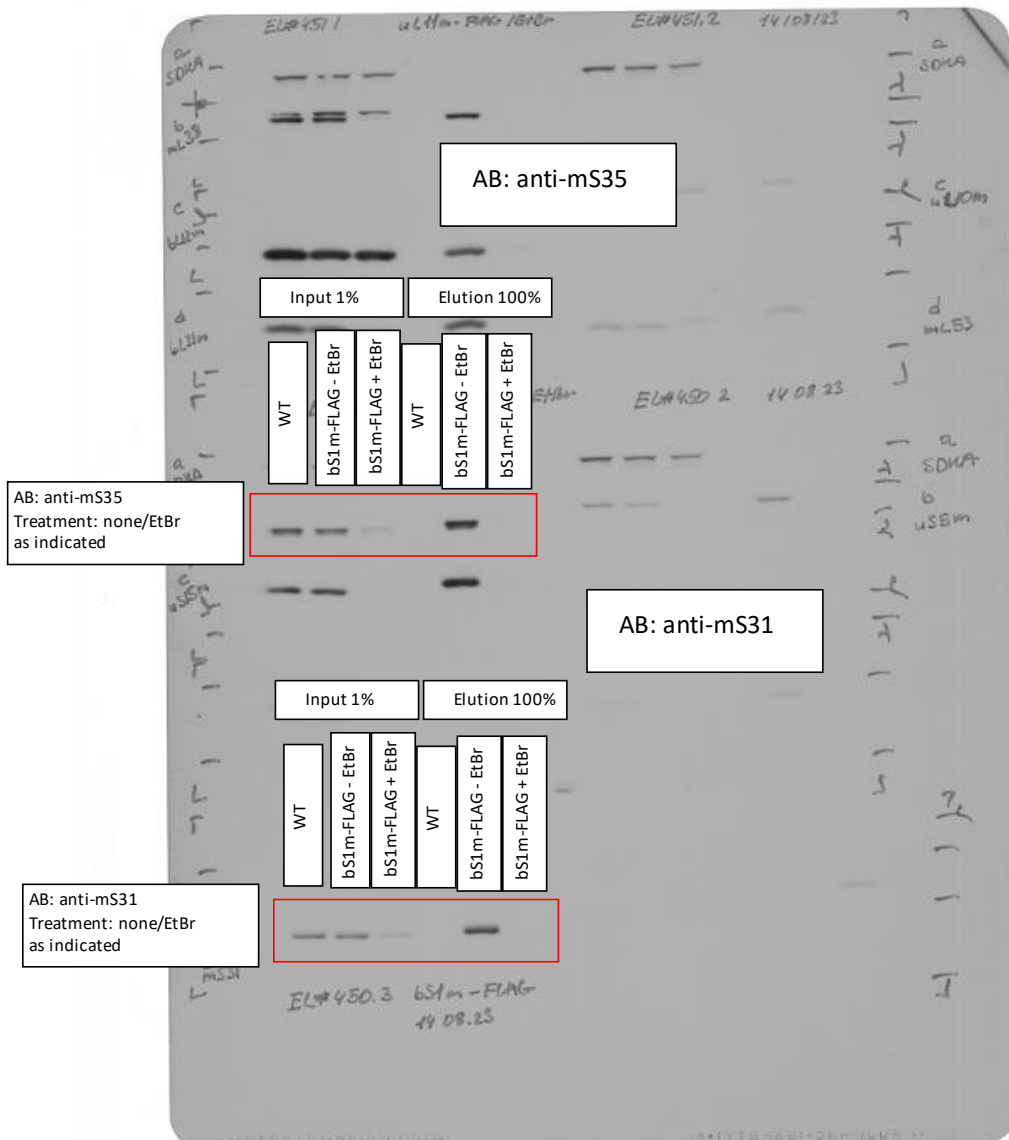

Source Data 1\_related to Main Fig.4d  
 EL#450 bS1m-FLAG IP + EtBr treatment

Rotor: N/A

Gradient: N/A

Speed: N/A

Time: N/A

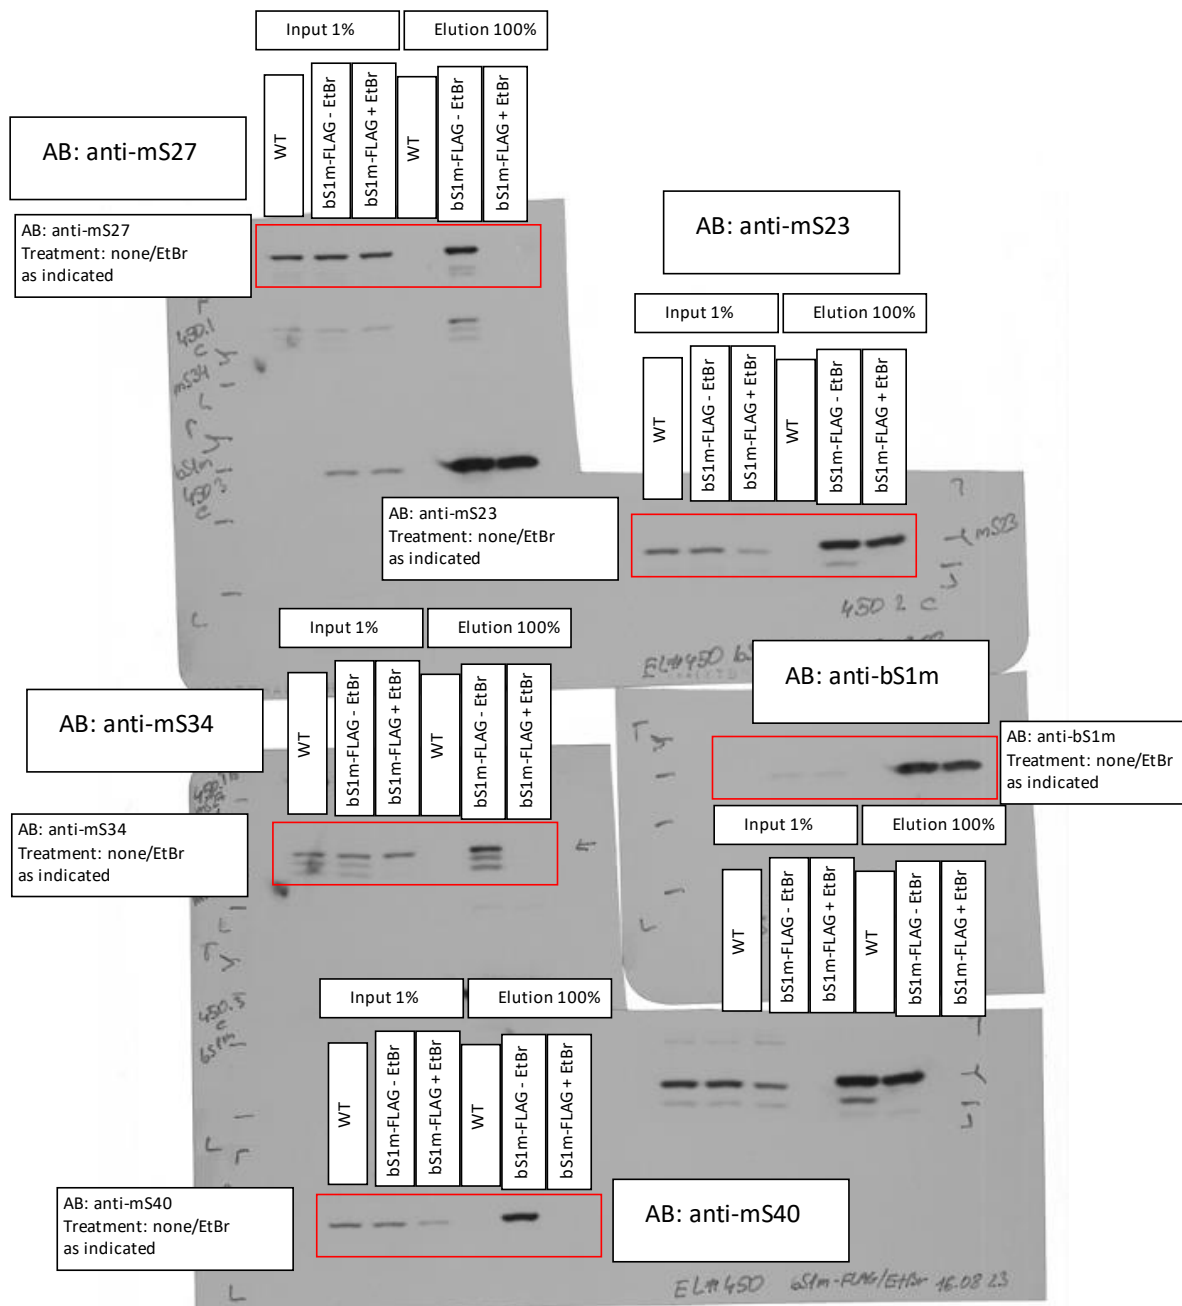

Source Data 1\_related to Main Fig.4d  
EL#450 bS1m-FLAG IP + EtBr treatment  
Rotor: N/A  
Gradient: N/A  
Speed: N/A  
Time: N/A

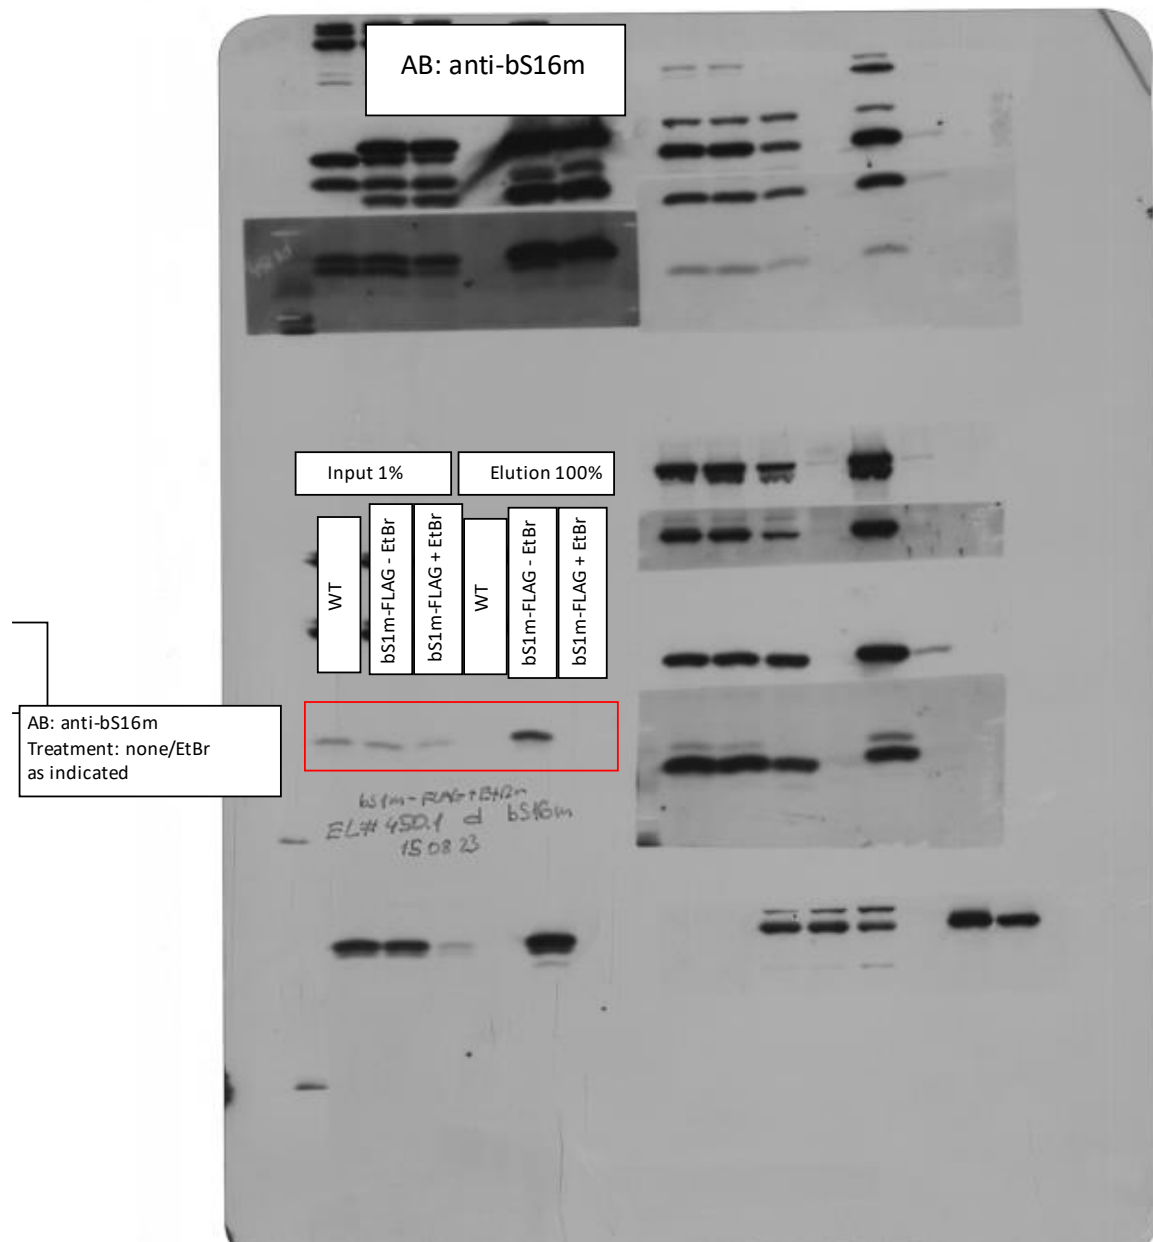



Source Data 1\_related to Main Fig.4d  
 EL#450 bS1m-FLAG IP + EtBr treatment

Rotor: N/A  
 Gradient: N/A  
 Speed: N/A  
 Time: N/A

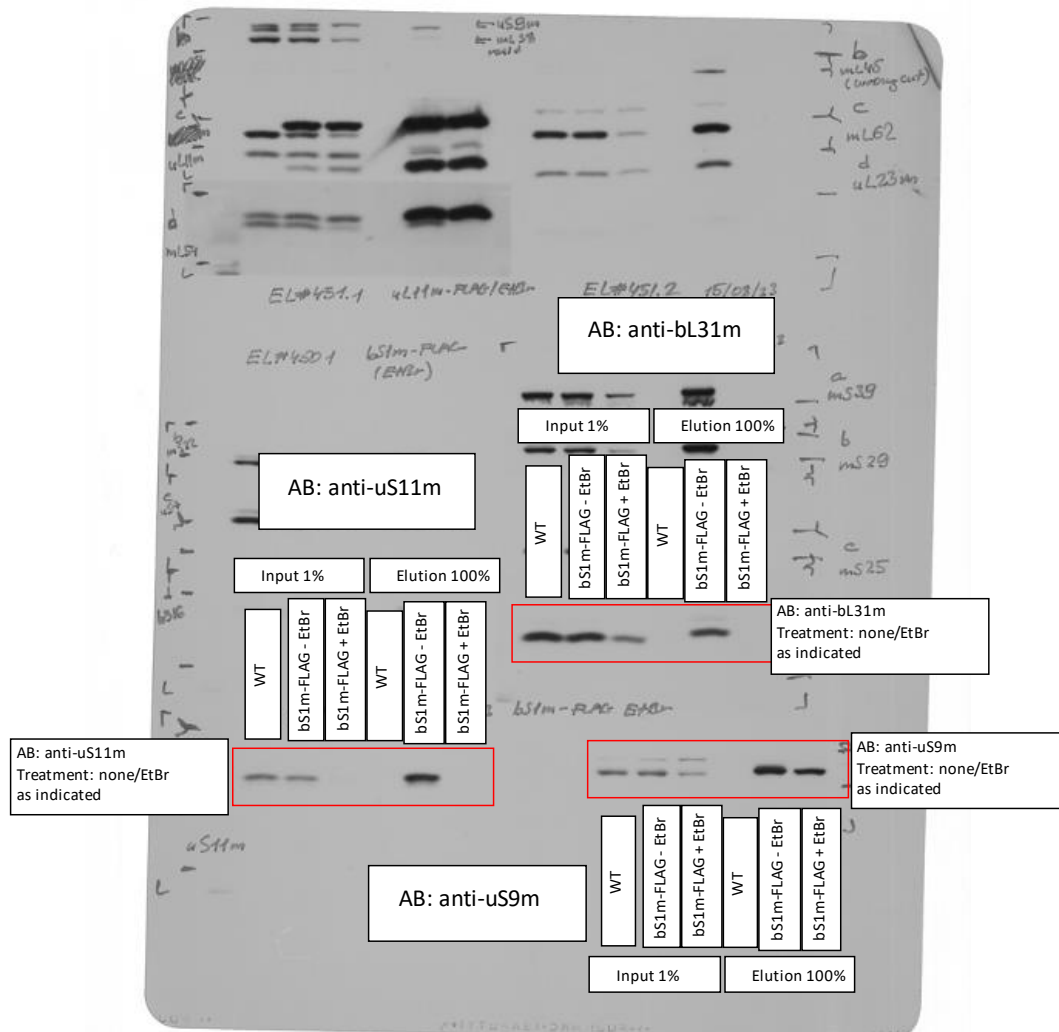

Source Data 1\_related to Main Fig.4d  
 EL#450 bS1m-FLAG IP + EtBr treatment

Rotor: N/A  
 Gradient: N/A  
 Speed: N/A  
 Time: N/A

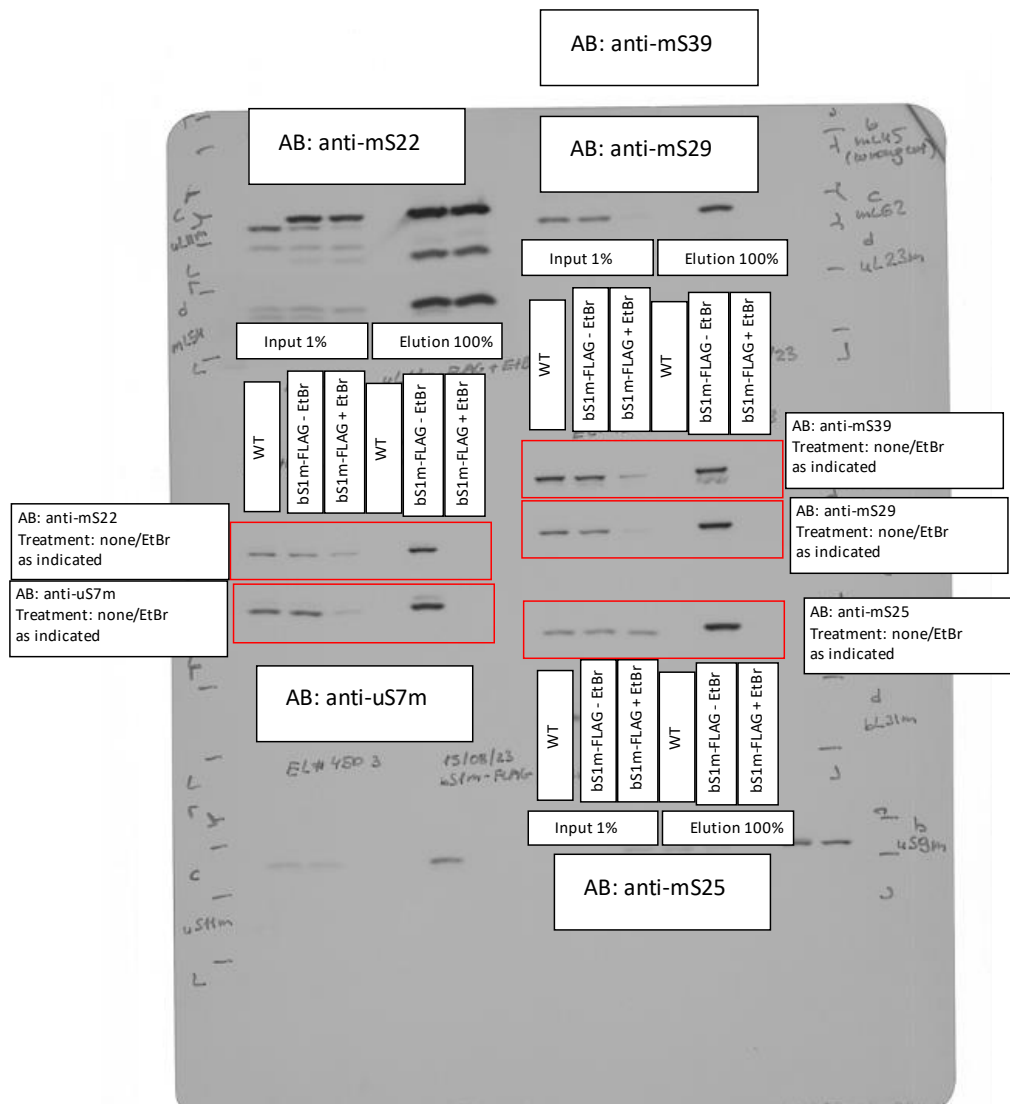

Source Data 1\_related to Main Fig.4d  
 EL#450 bS1m-FLAG IP + EtBr treatment

Rotor: N/A  
 Gradient: N/A  
 Speed: N/A  
 Time: N/A

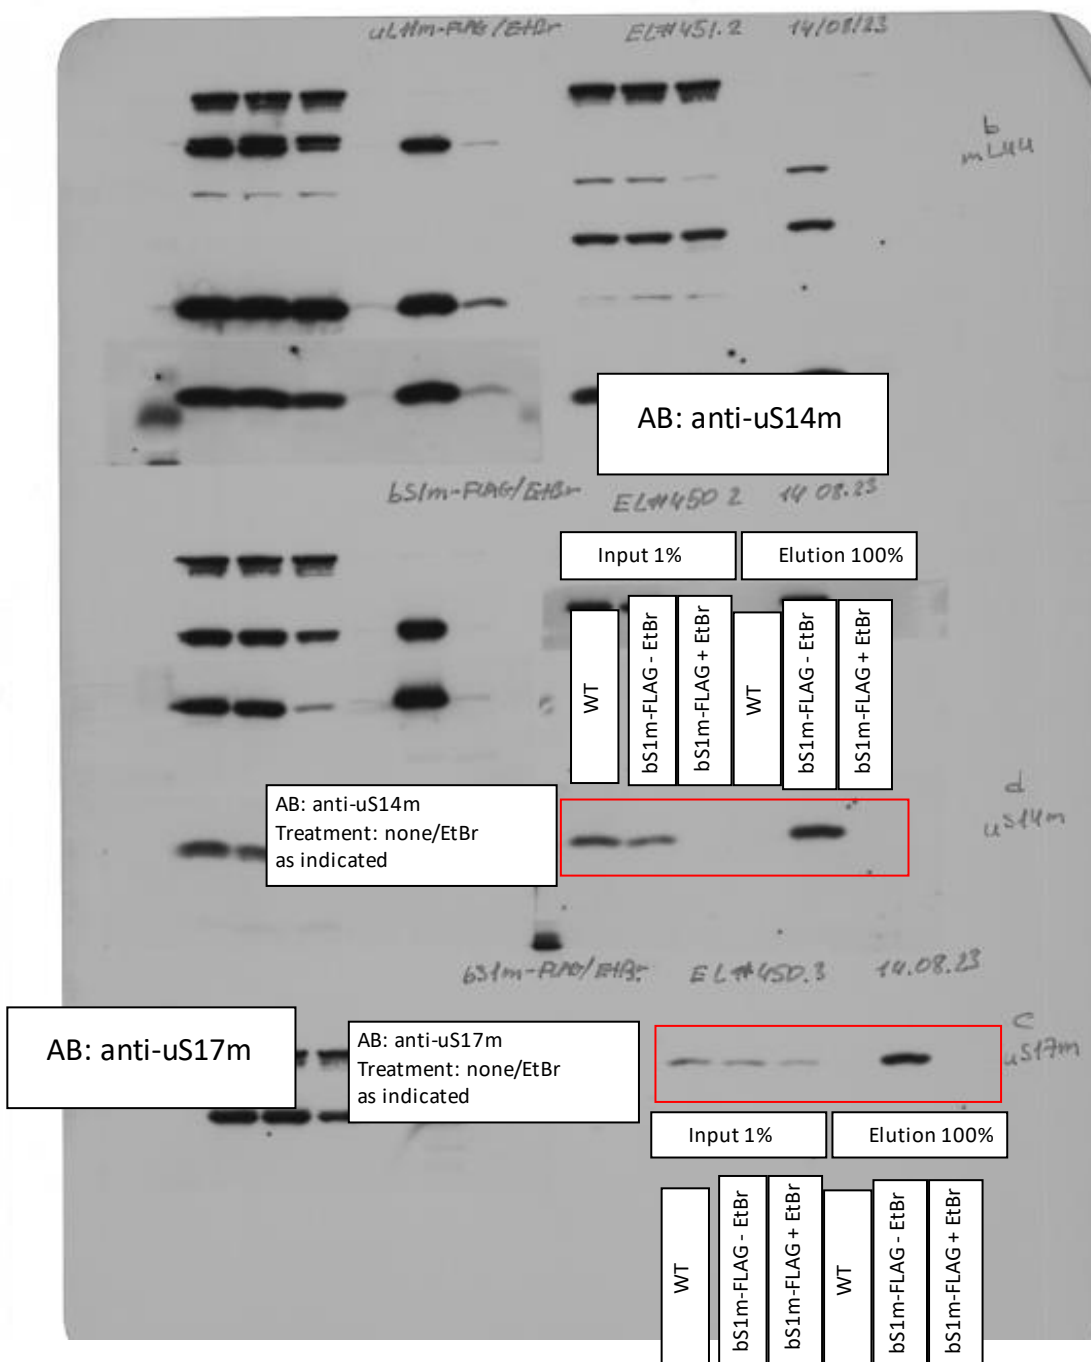

Source Data 1\_related to Main Fig.4d  
 EL#450 bS1m-FLAG IP + EtBr treatment

Rotor: N/A  
 Gradient: N/A  
 Speed: N/A  
 Time: N/A

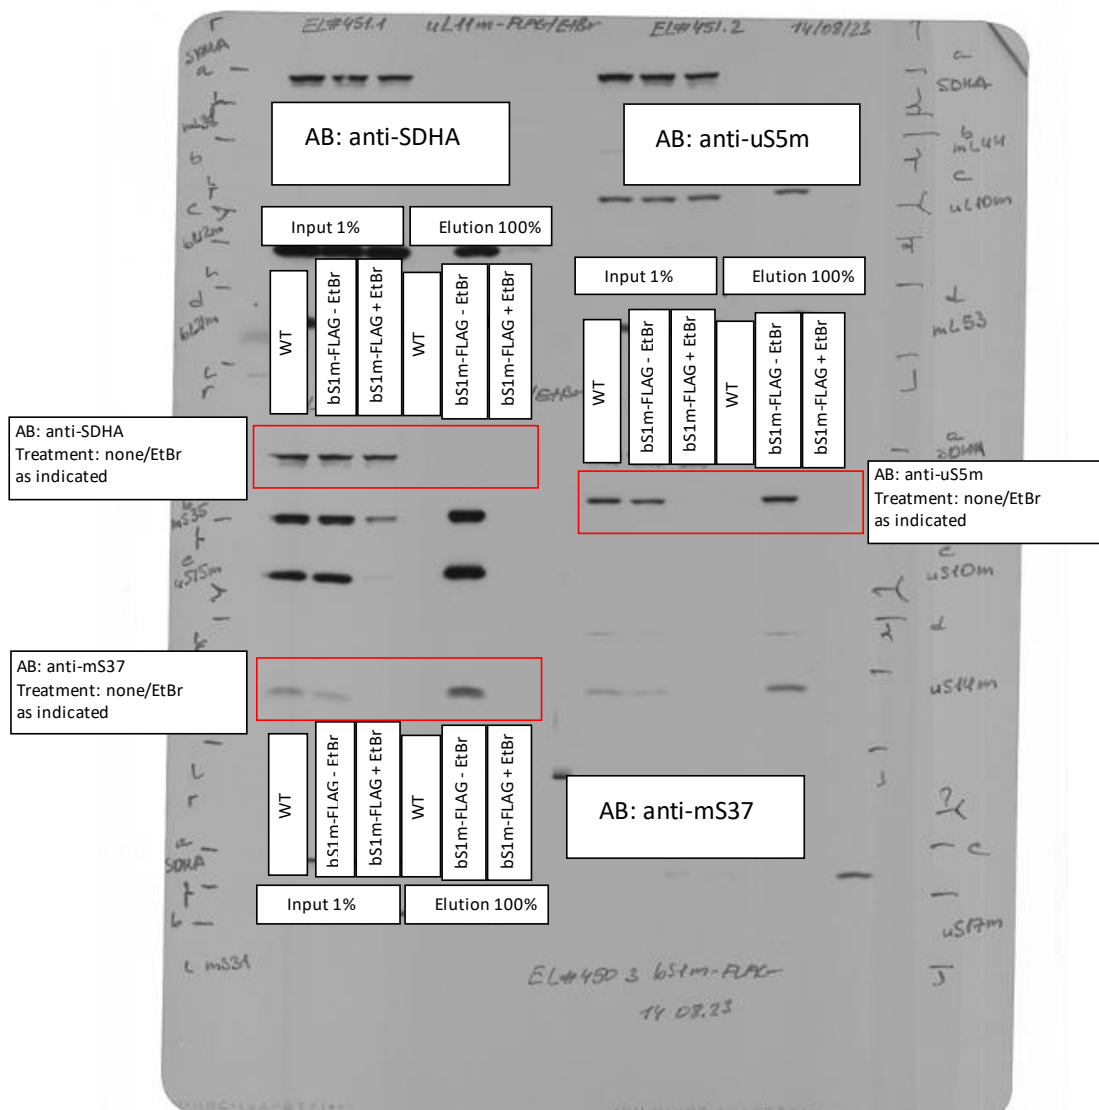

Source Data 1\_related to Main Fig.4e  
 EL#445 mS27-FLAG IP + EtBr treatment

Rotor: N/A

Gradient: N/A

Speed: N/A

Time: N/A

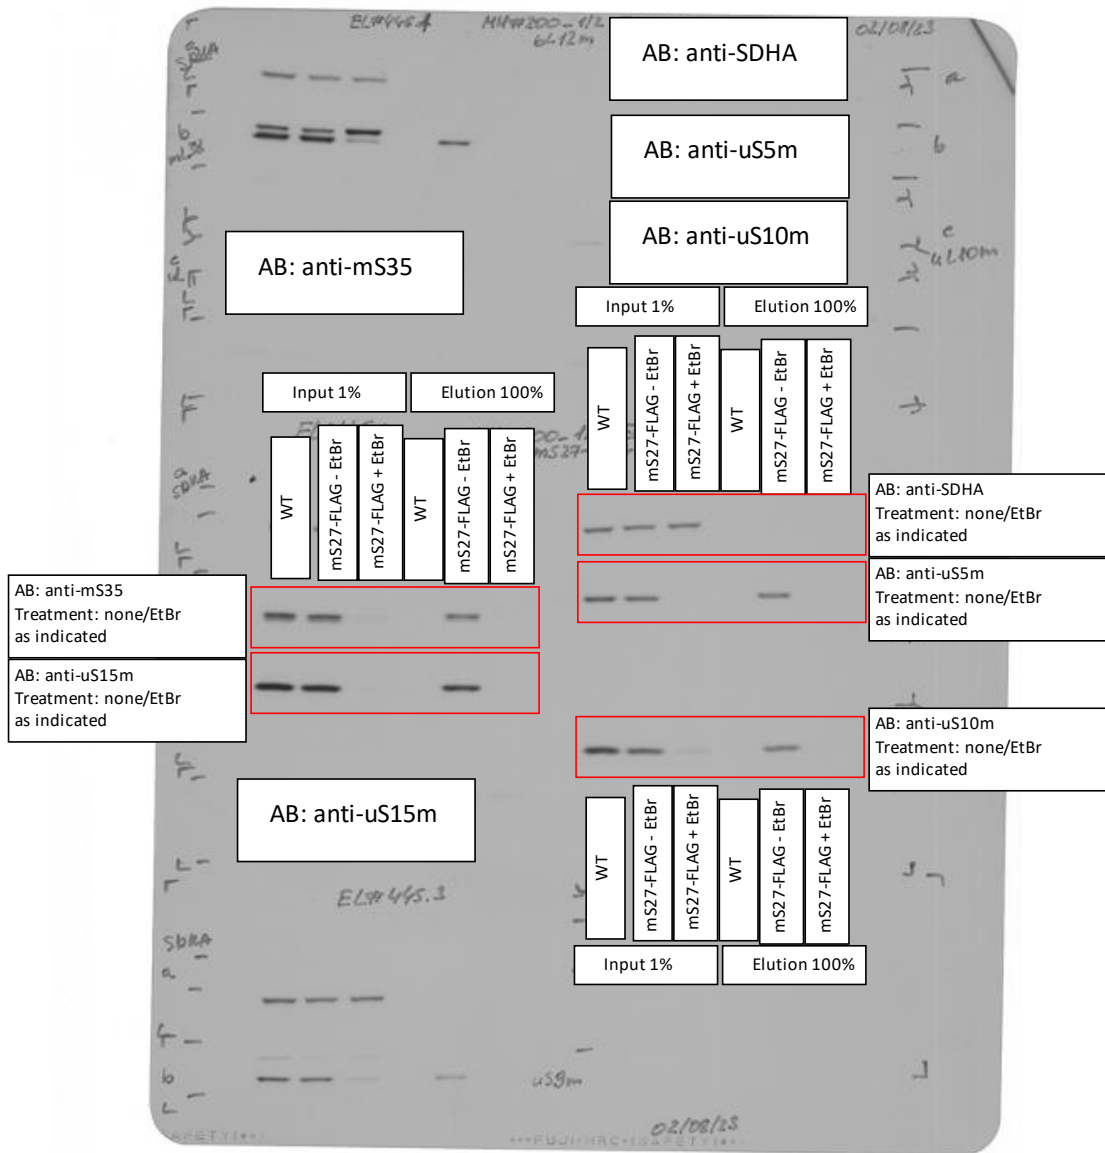



Source Data 1\_related to Main Fig.4e  
 EL#445 mS27-FLAG IP + EtBr treatment  
 Rotor: N/A  
 Gradient: N/A  
 Speed: N/A  
 Time: N/A

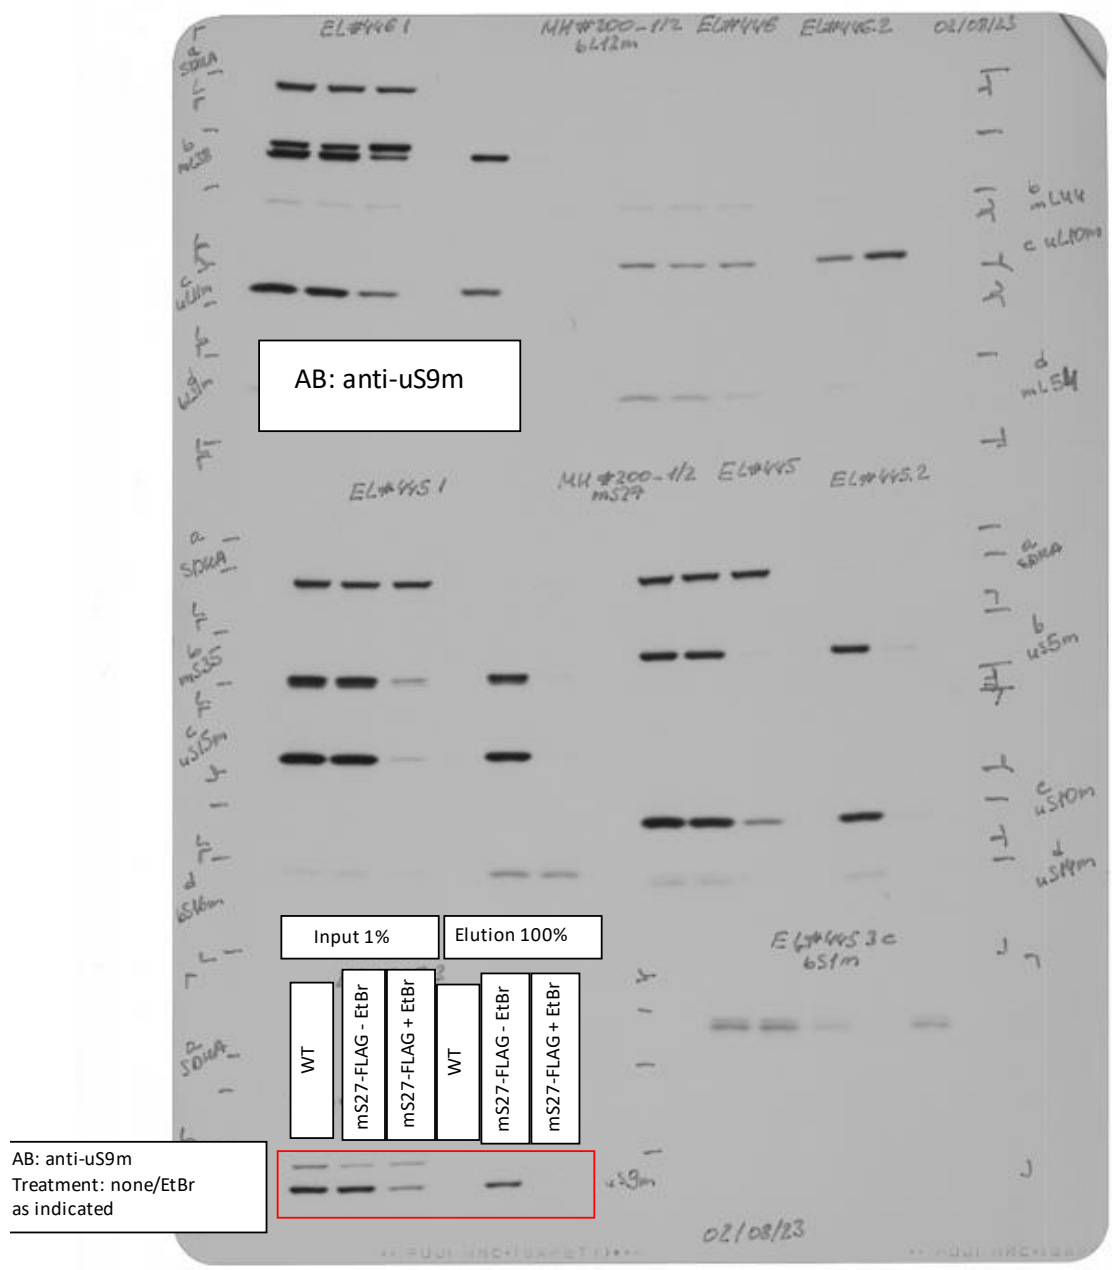

Source Data 1\_related to Main Fig.4e  
 EL#445 mS27-FLAG IP + EtBr treatment  
 Rotor: N/A  
 Gradient: N/A  
 Speed: N/A  
 Time: N/A

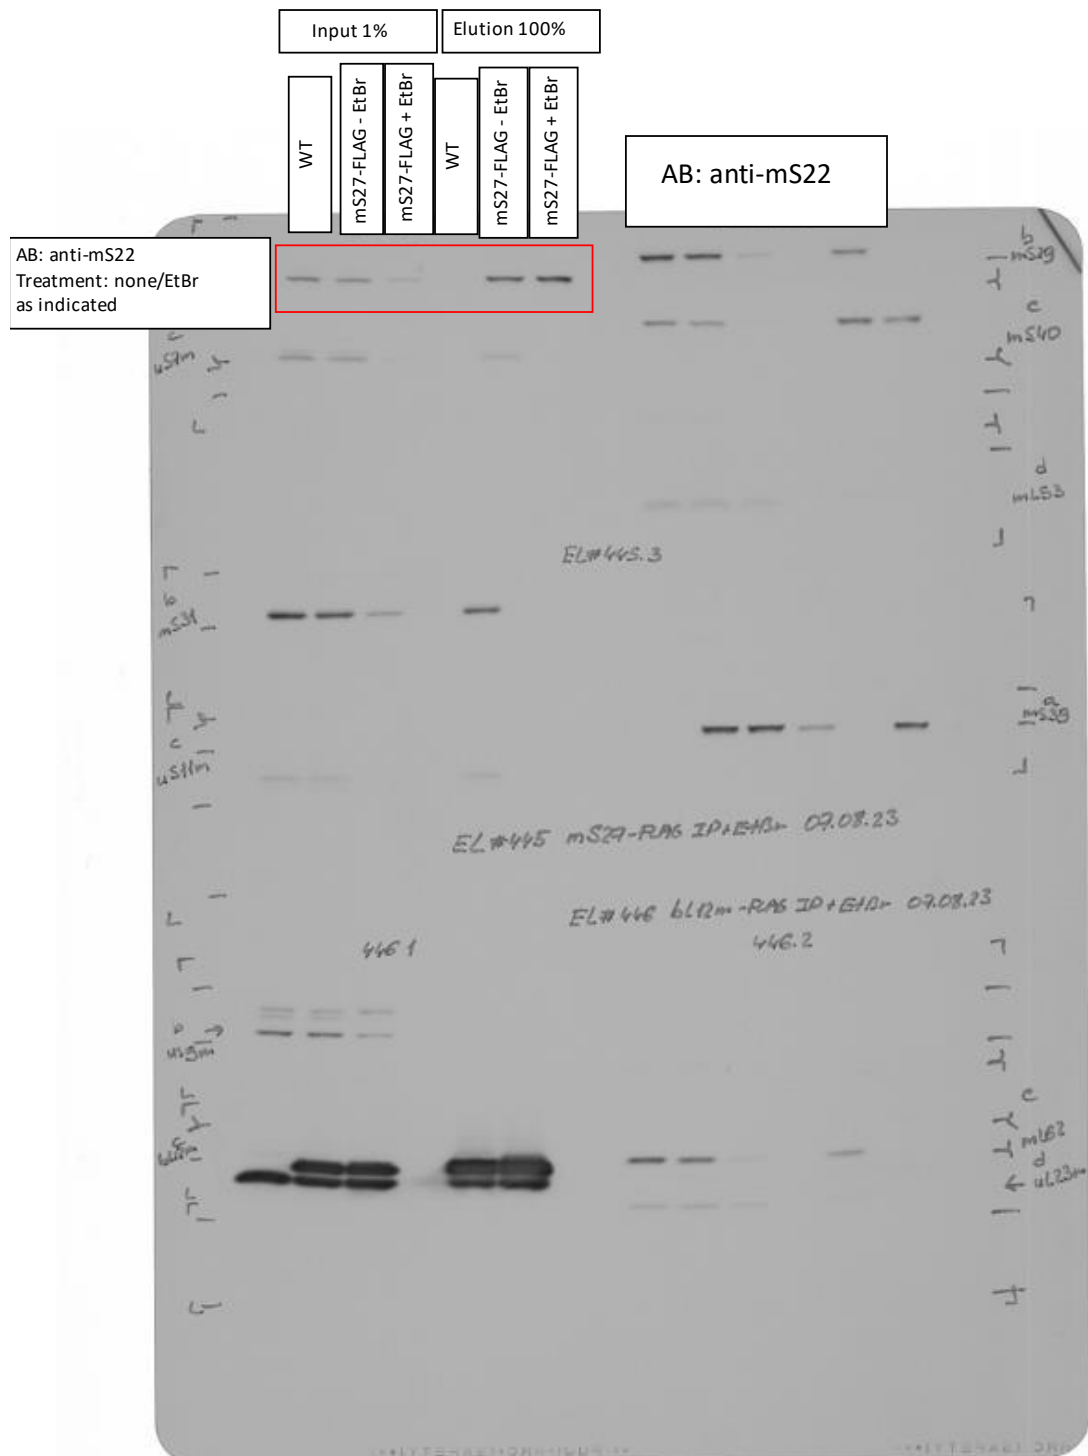





Source Data 1\_related to Main Fig.4e  
 EL#445 mS27-FLAG IP + EtBr treatment  
 Rotor: N/A  
 Gradient: N/A  
 Speed: N/A  
 Time: N/A

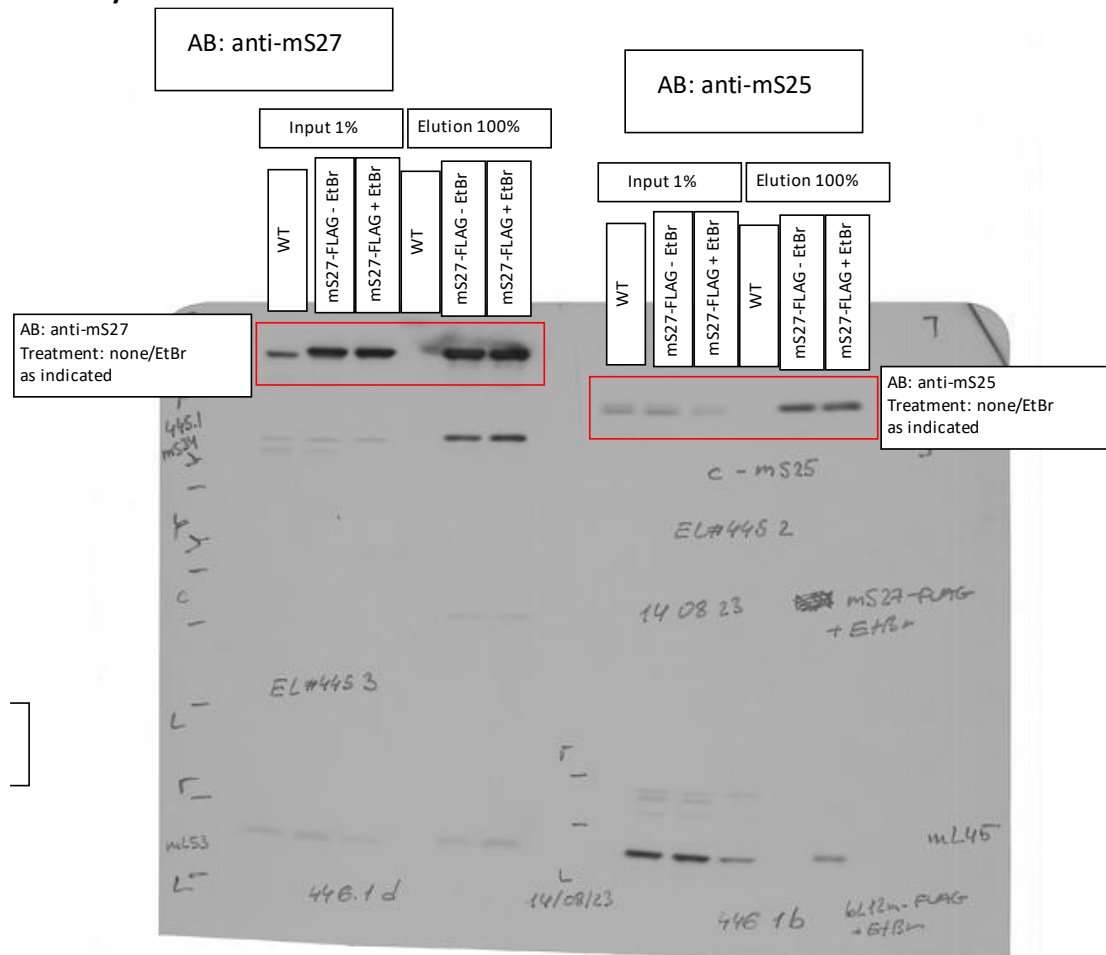

Source Data 1\_related to Main Fig.4e  
EL#445 mS27-FLAG IP + EtBr treatment  
Rotor: N/A  
Gradient: N/A  
Speed: N/A  
Time: N/A

AB: anti-uS17m

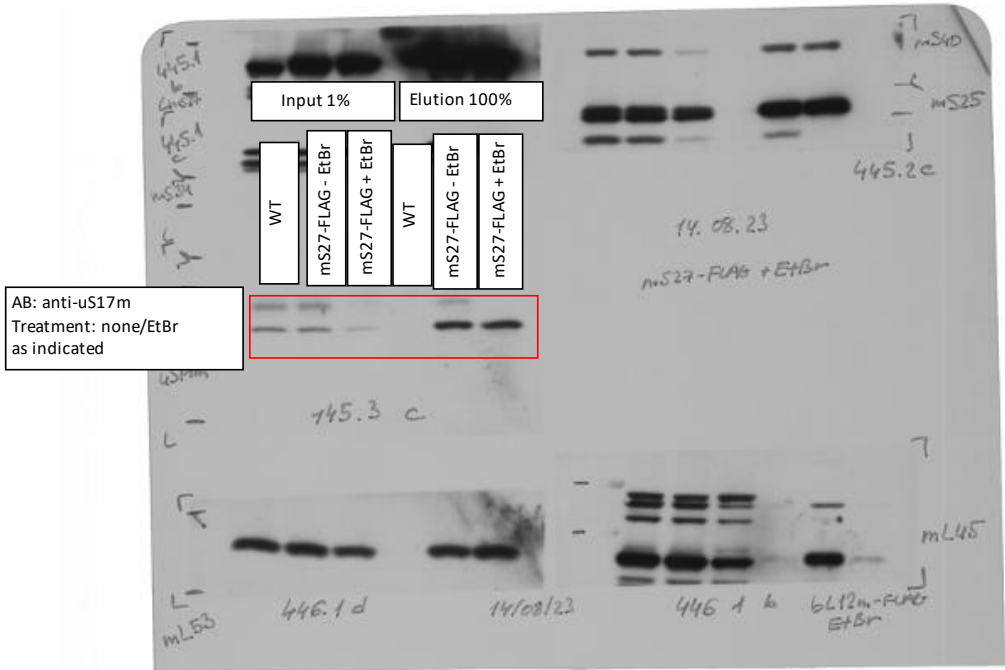

Source Data 1\_related to Main Fig.4e  
 EL#445 mS27-FLAG IP + EtBr treatment  
 Rotor: N/A  
 Gradient: N/A  
 Speed: N/A  
 Time: N/A

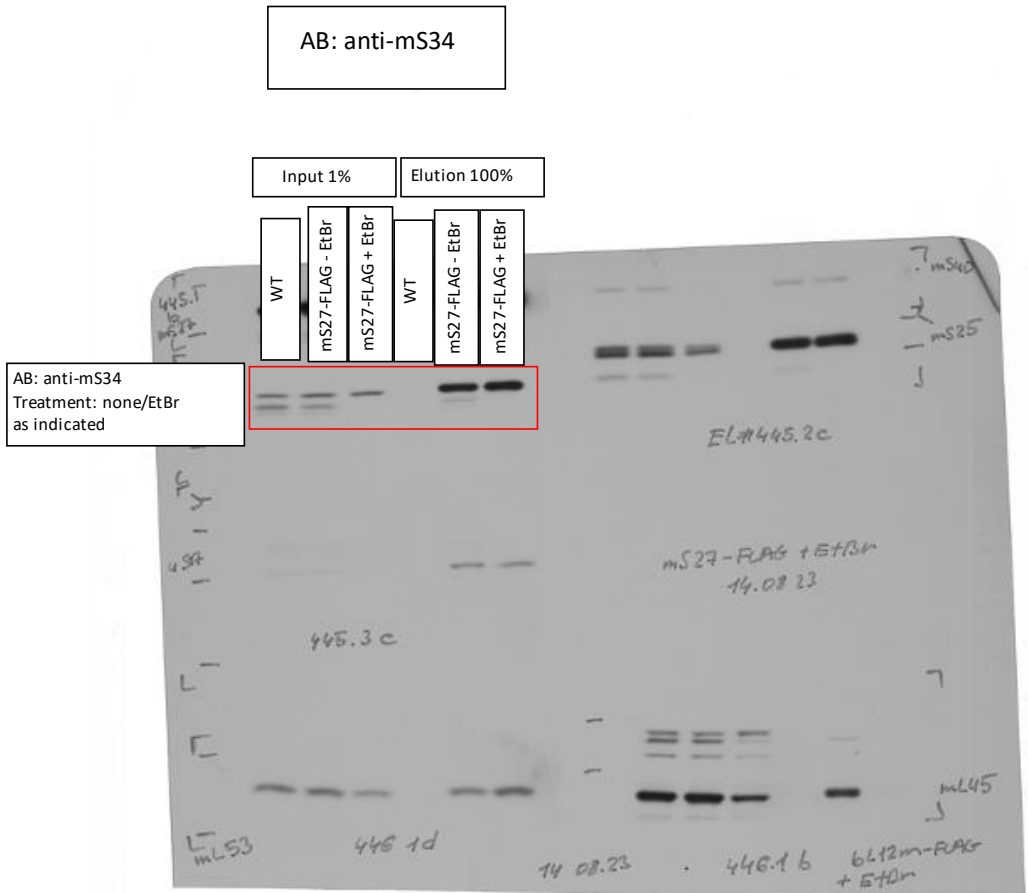

Source Data 1\_related to Main Fig.4f  
 EL#378 mS22-FLAG IP + Gradient + EtBr treatment  
 Rotor: SW41 Ti  
 Gradient: Sucrose 5-30%  
 Speed: 158.000xg  
 Time: 15h

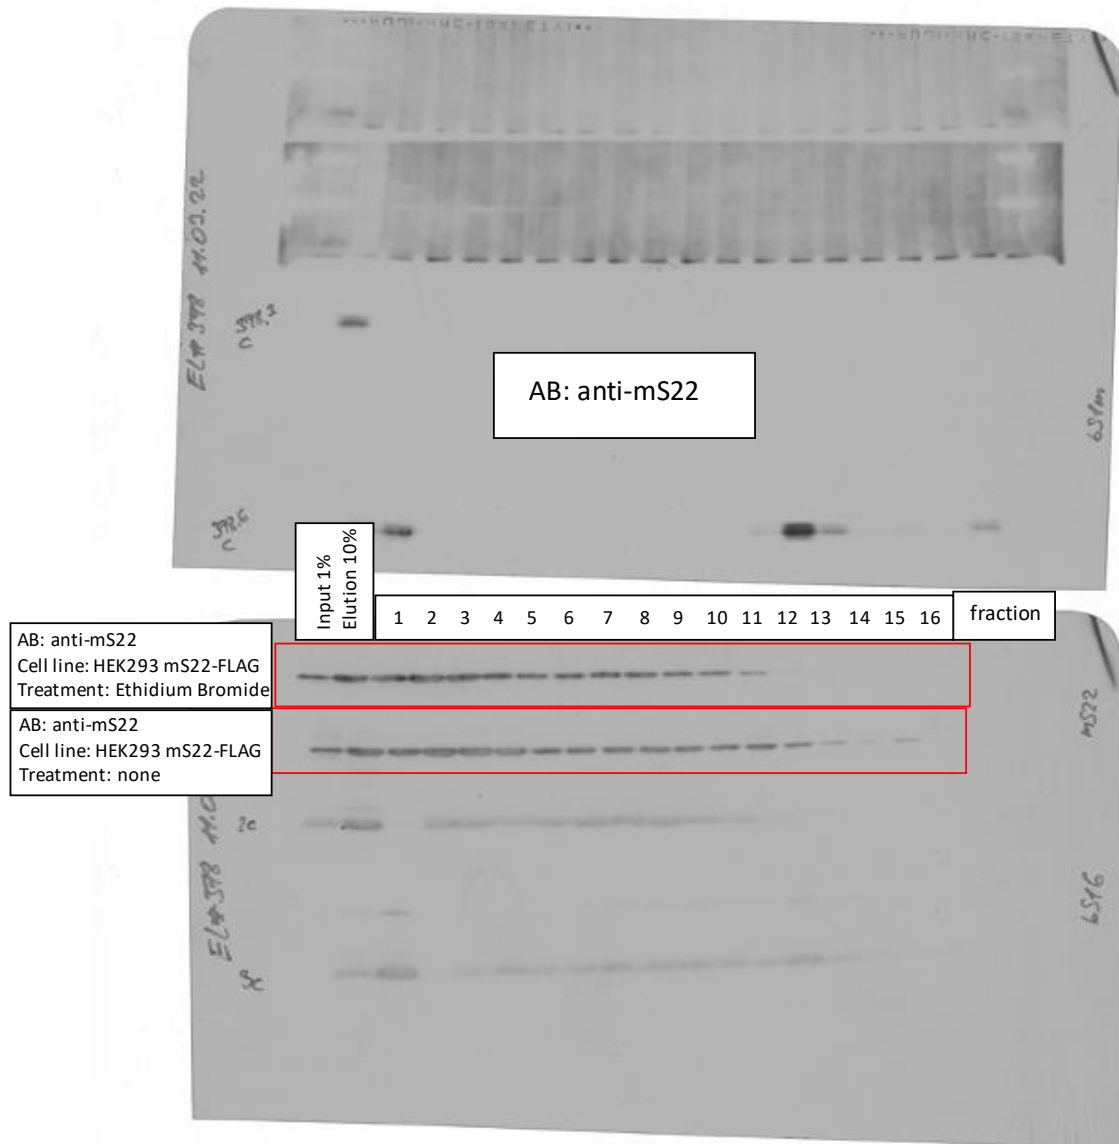

Source Data 1\_related to Main Fig.4f  
 EL#378 mS22-FLAG IP + Gradient + EtBr treatment  
 Rotor: SW41 Ti  
 Gradient: Sucrose 5-30%  
 Speed: 158.000xg  
 Time: 15h

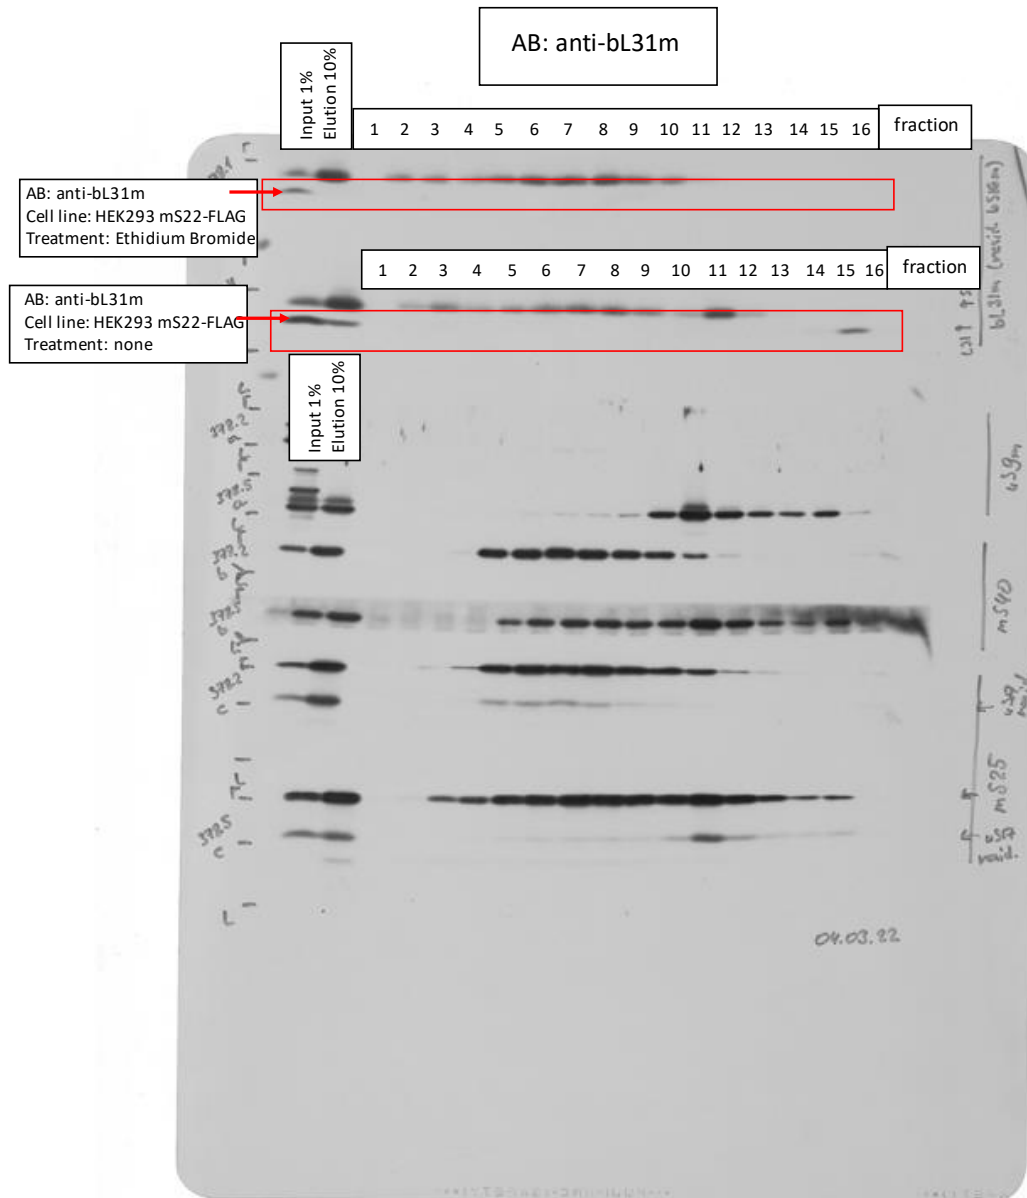

Source Data 1\_related to Main Fig.4f  
 EL#378 mS22-FLAG IP + Gradient + EtBr treatment  
 Rotor: SW41 Ti  
 Gradient: Sucrose 5-30%  
 Speed: 158.000xg  
 Time: 15h

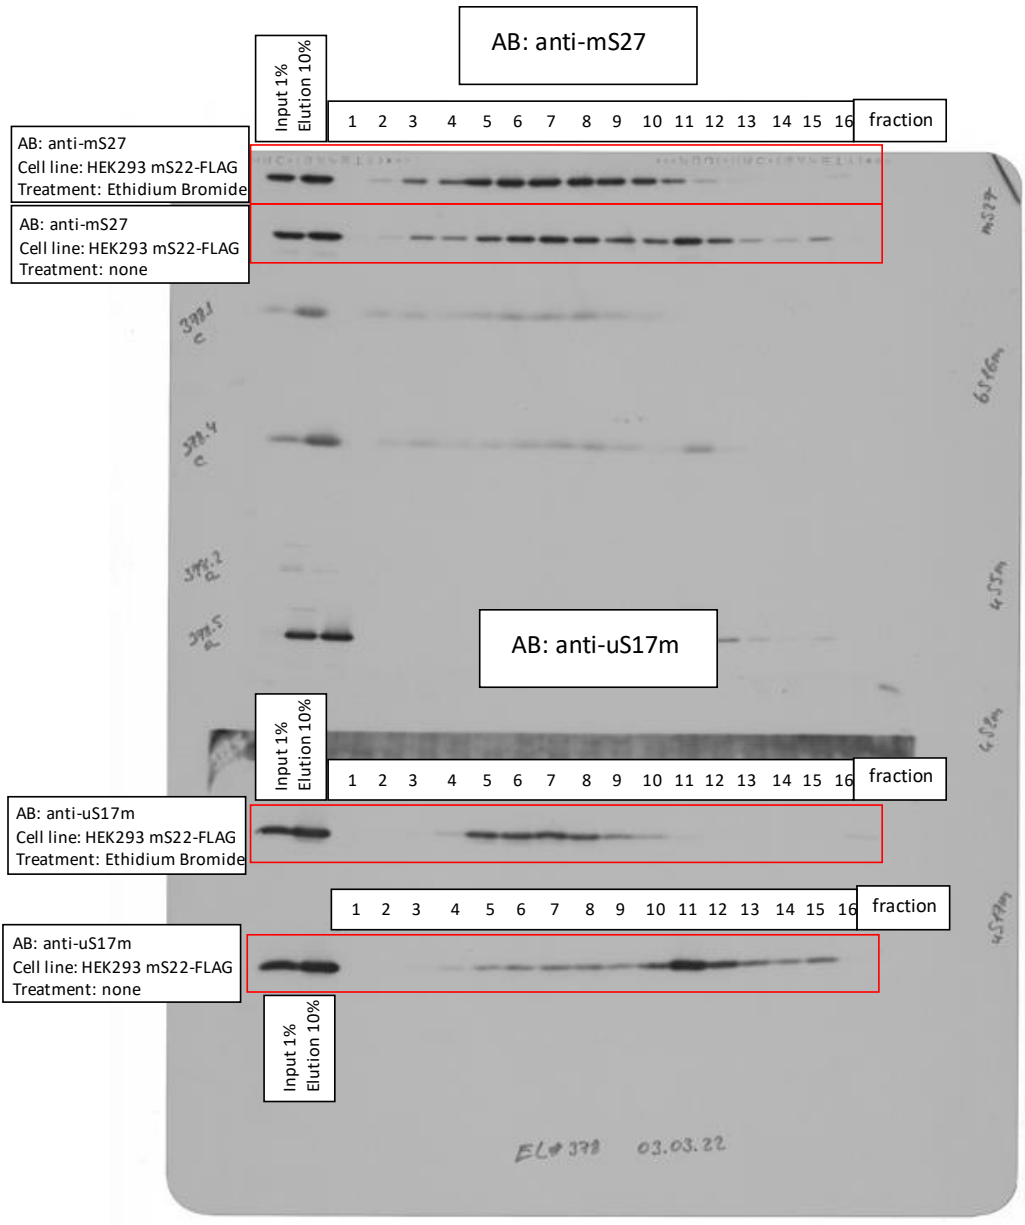

Source Data 1\_related to Main Fig.4f  
EL#378 mS22-FLAG IP + Gradient + EtBr treatment  
Rotor: SW41 Ti  
Gradient: Sucrose 5-30%  
Speed: 158.000xg  
Time: 15h

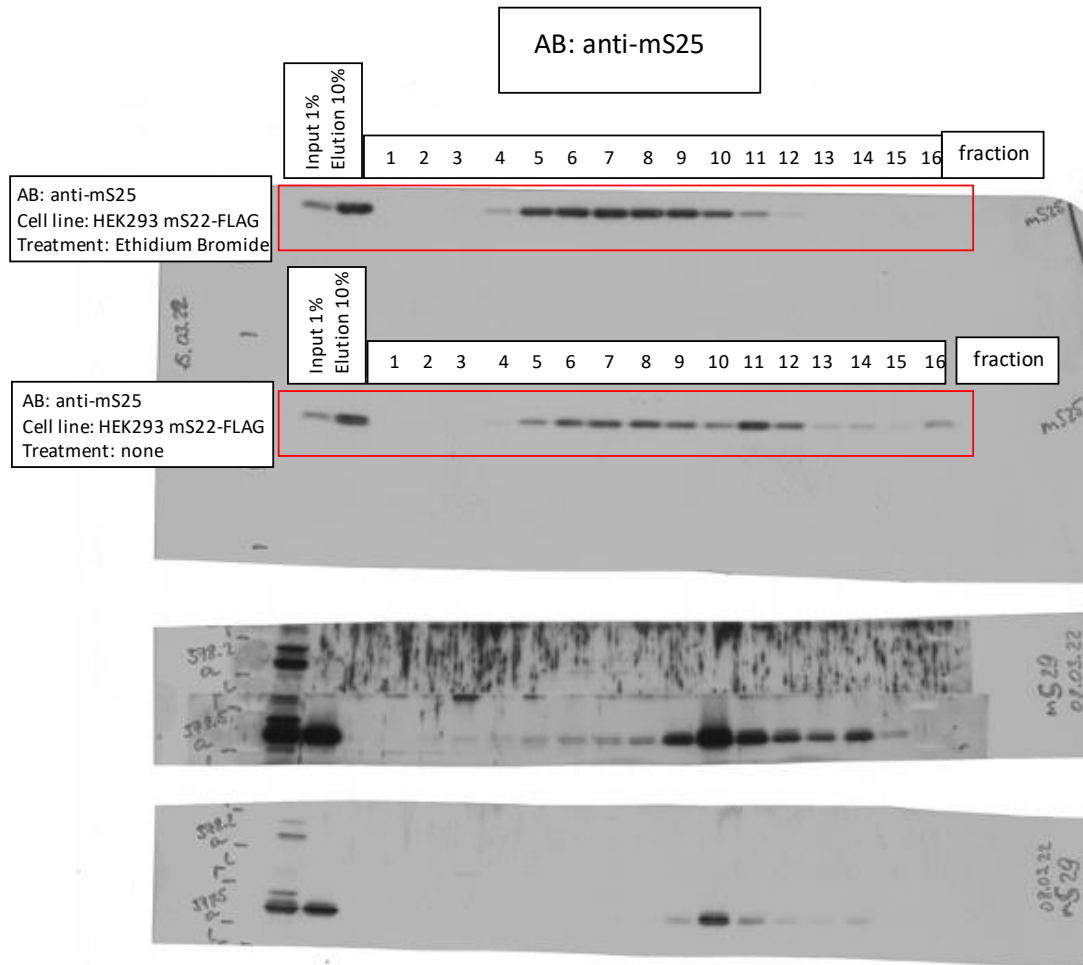



Source Data 1\_related to Main Fig.4f  
 EL#378 mS22-FLAG IP + Gradient + EtBr treatment  
 Rotor: SW41 Ti  
 Gradient: Sucrose 5-30%  
 Speed: 158.000xg  
 Time: 15h

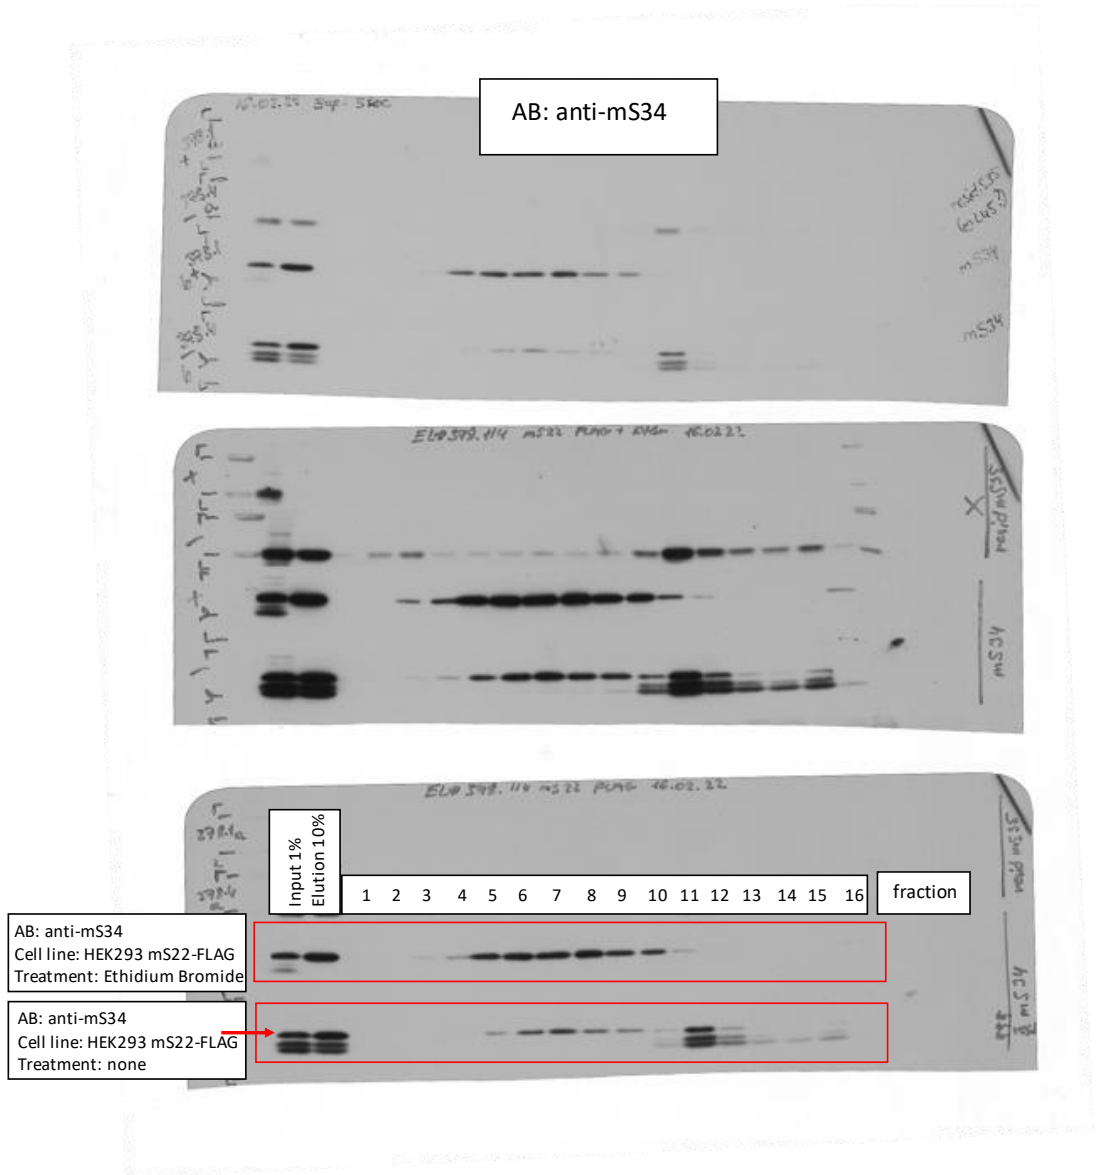

Source Data 1\_related to Main Fig.4f  
 EL#378 mS22-FLAG IP + Gradient + EtBr treatment  
 Rotor: SW41 Ti  
 Gradient: Sucrose 5-30%  
 Speed: 158.000xg  
 Time: 15h

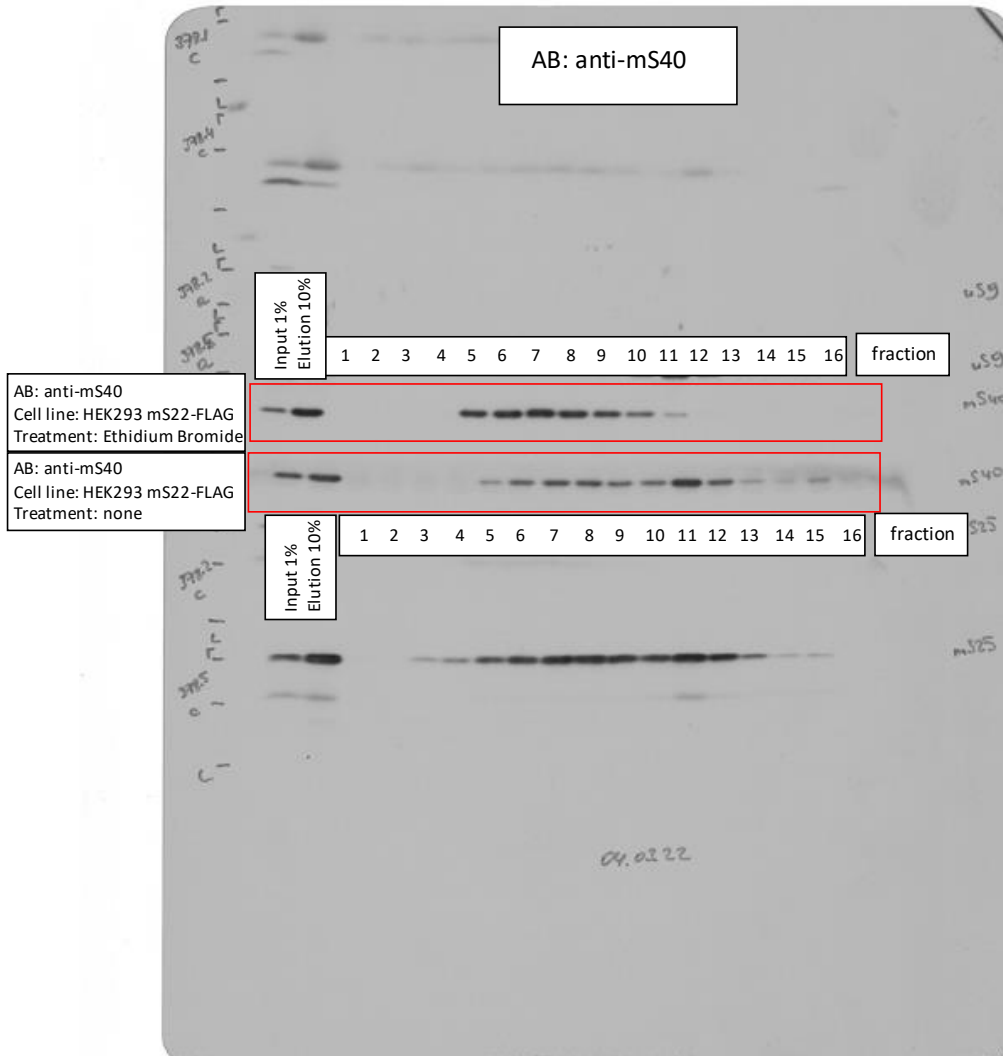

Source Data 1\_related to Main Fig.4f  
 EL#378 mS22-FLAG IP + Gradient + EtBr treatment  
 Rotor: SW41 Ti  
 Gradient: Sucrose 5-30%  
 Speed: 158.000xg  
 Time: 15h

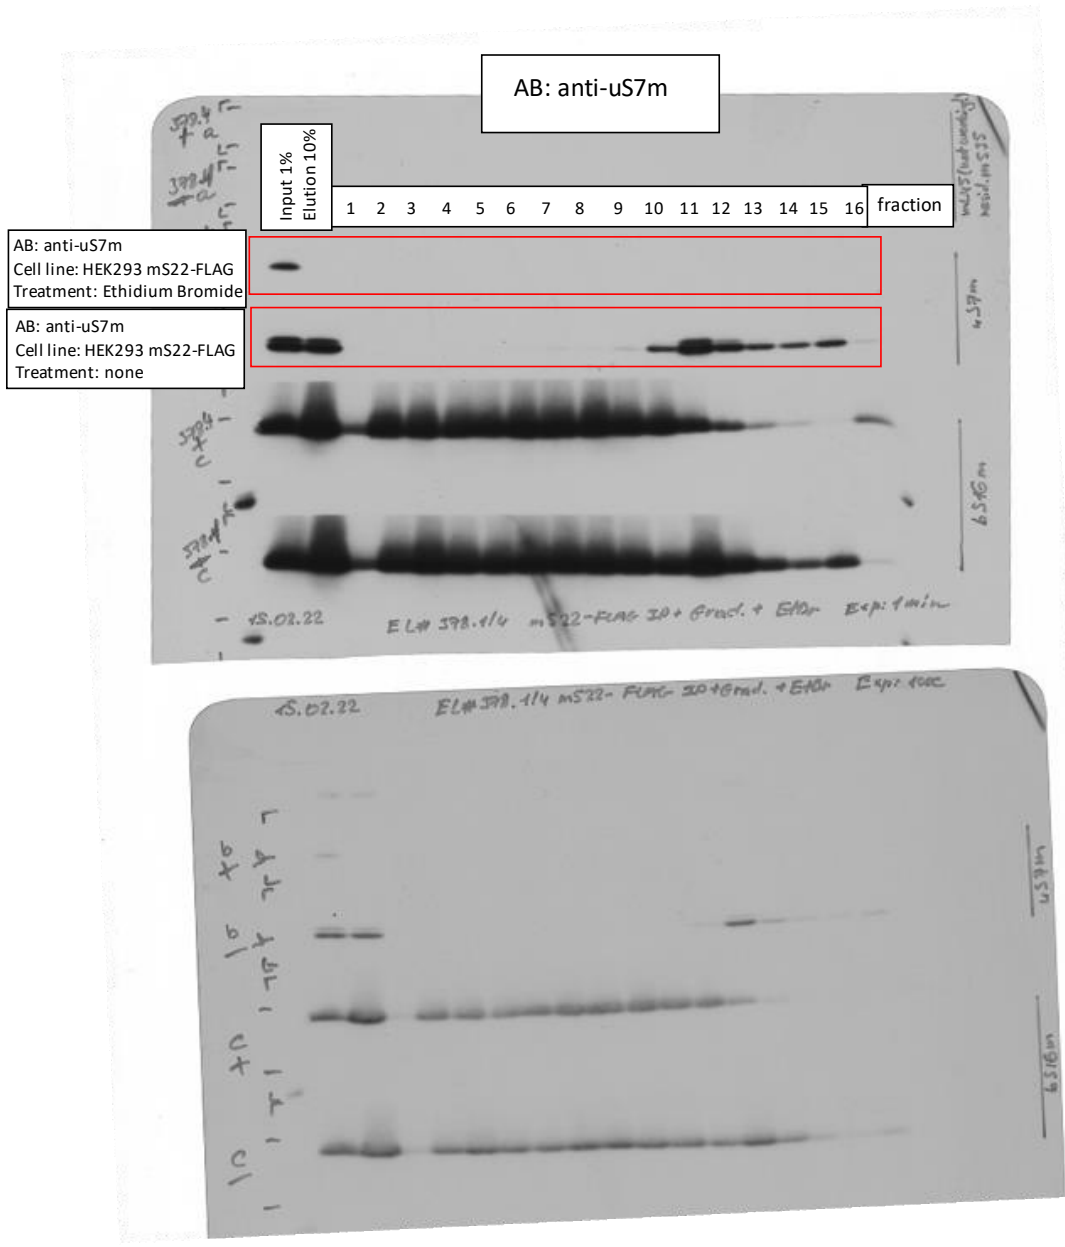

Supplement: 41594_2024_1356_MOESM16_ESM.pdf [file 41594_2024_1356_MOESM16_ESM.pdf]
