# Supplementary material for: A roadmap for ribosome assembly in human mitochondria
Source: PubMed Central journal article supplement (PMC11638073; doi:10.1038/s41594-024-01356-w), 2024-07-11

Source Data 2\_related to Extended Data Fig.3a

EL#349 mS27-FLAG IP + Gradient

Rotor: SW41 Ti

Gradient: Sucrose 5-30%

Speed: 158.000xg

Time: 15h

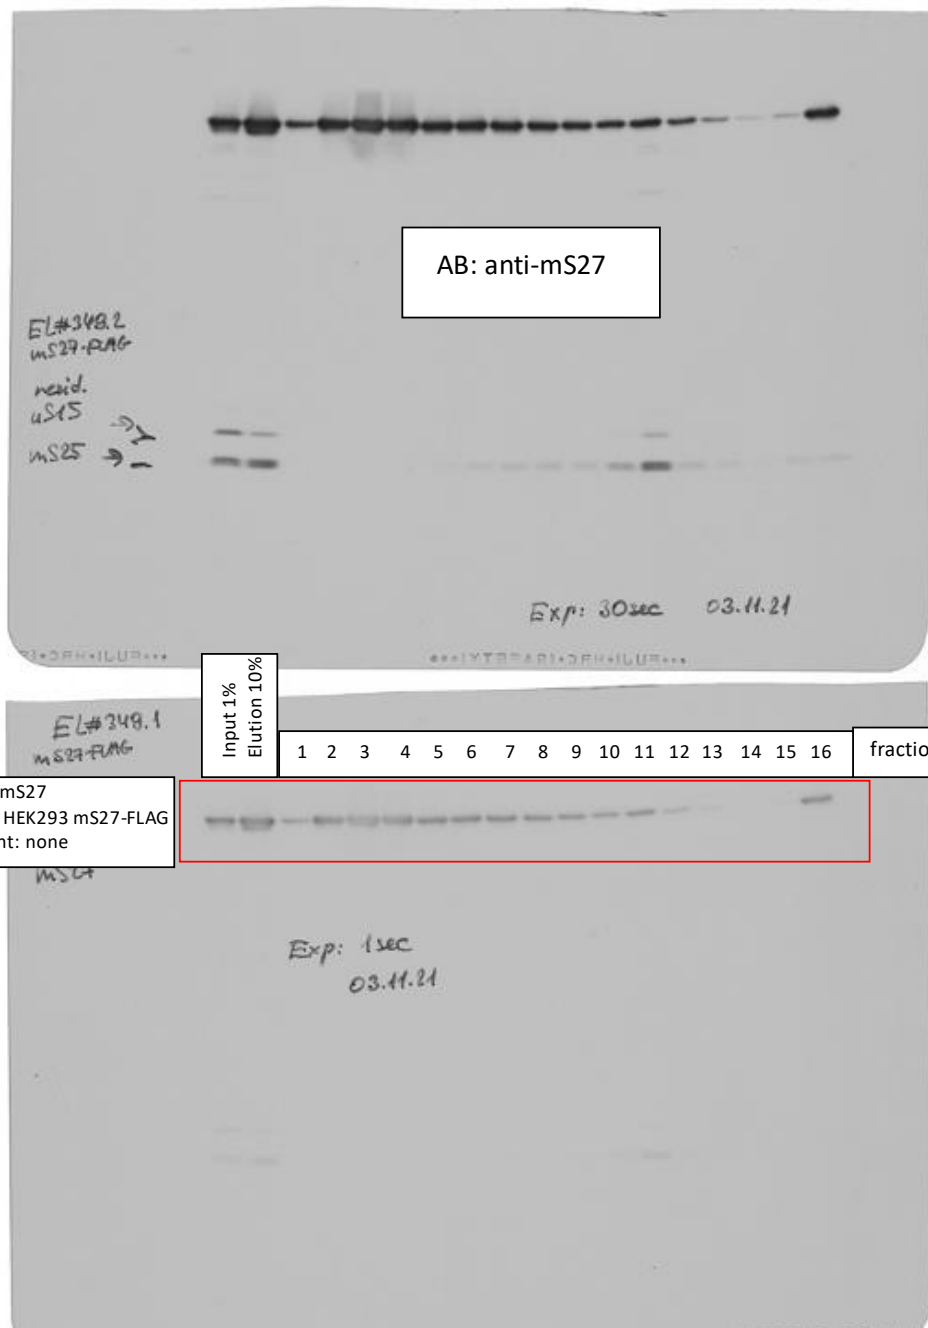

Source Data 2\_related to Extended Data Fig.3a

EL#349 mS27-FLAG IP + Gradient

Rotor: SW41 Ti

Gradient: Sucrose 5-30%

Speed: 158.000xg

Time: 15h

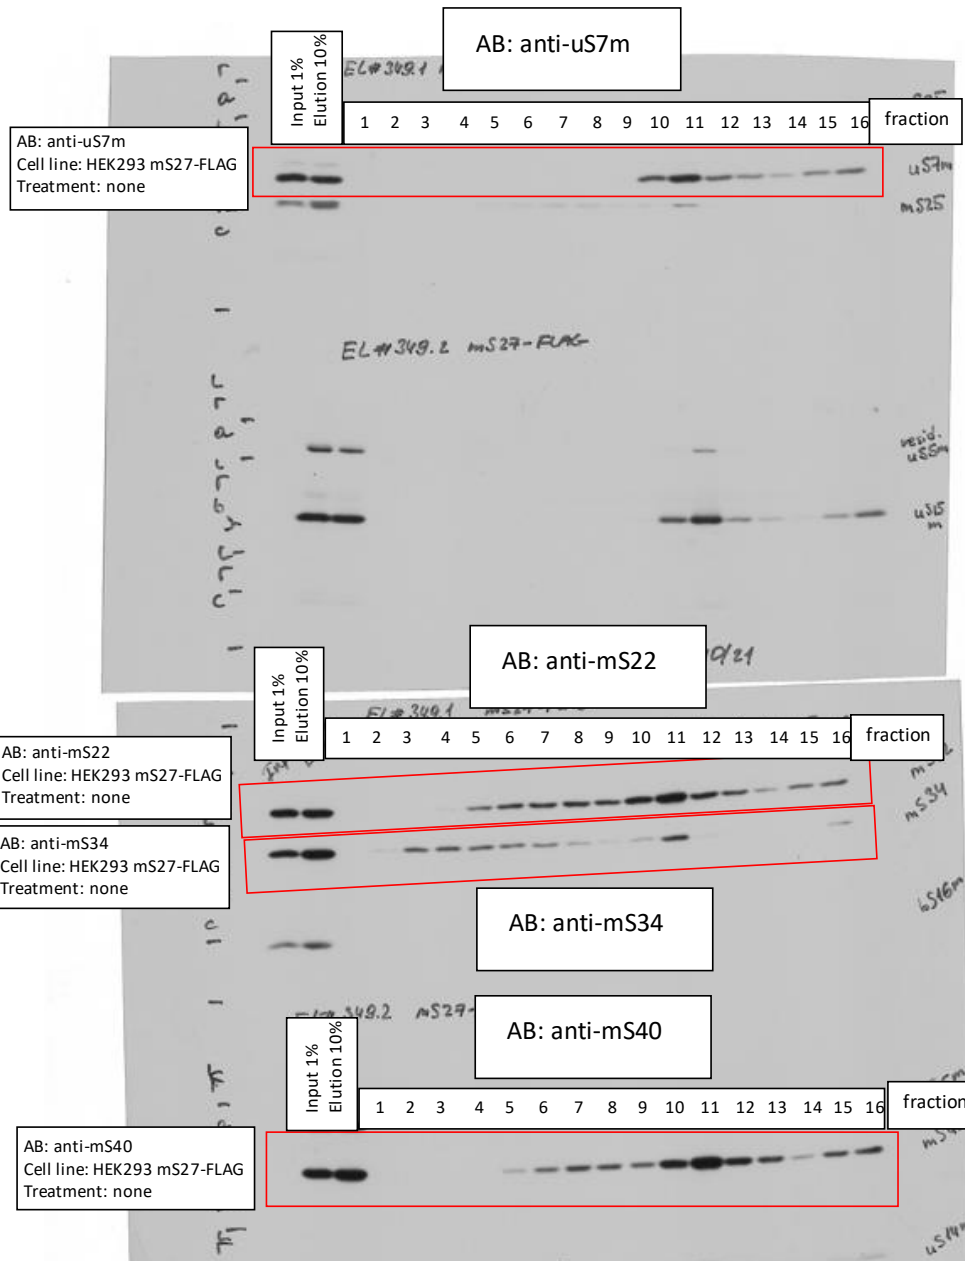

Source Data 2\_related to Extended Data Fig.3a

EL#349 mS27-FLAG IP + Gradient

Rotor: SW41 Ti

Gradient: Sucrose 5-30%

Speed: 158.000xg

Time: 15h

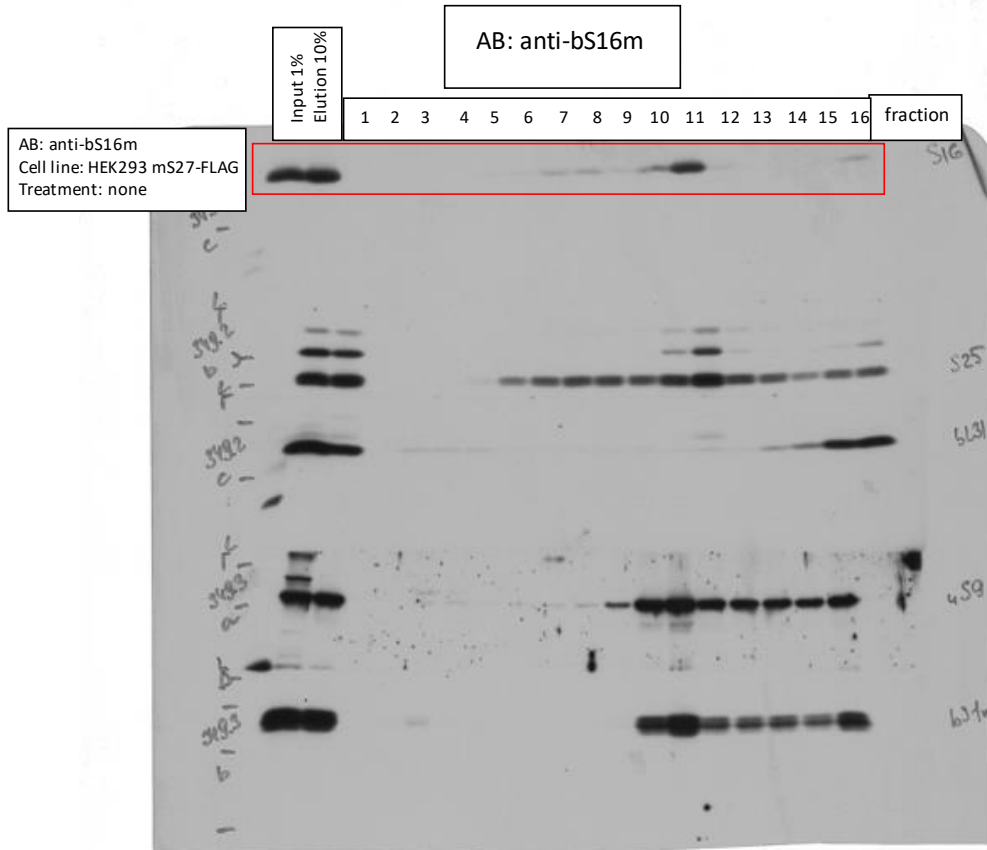

Source Data 2\_related to Extended Data Fig.3a

EL#349 mS27-FLAG IP + Gradient

Rotor: SW41 Ti

Gradient: Sucrose 5-30%

Speed: 158.000xg

Time: 15h

AB: anti-uS17m

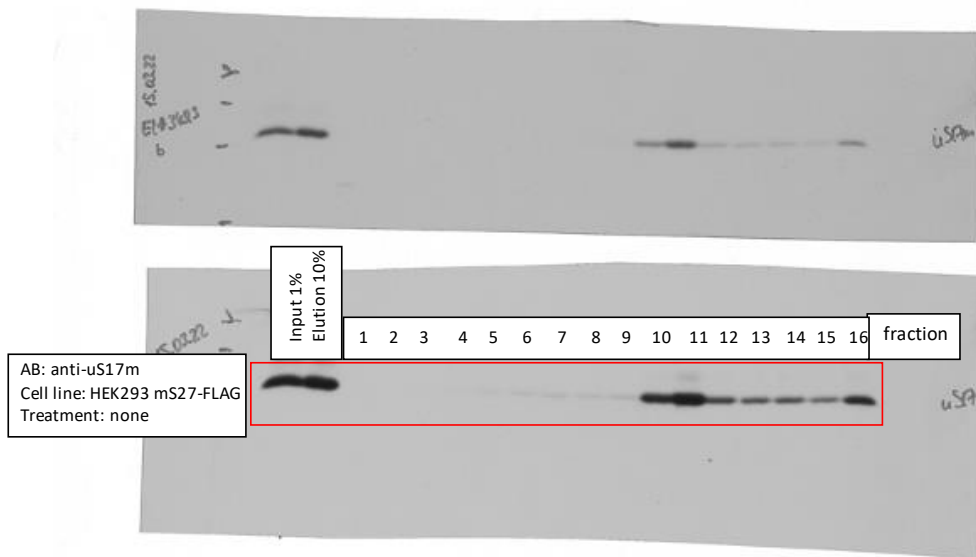

Source Data 2\_related to Extended Data Fig.3a

EL#349 mS27-FLAG IP + Gradient

Rotor: SW41 Ti

Gradient: Sucrose 5-30%

Speed: 158.000xg

Time: 15h

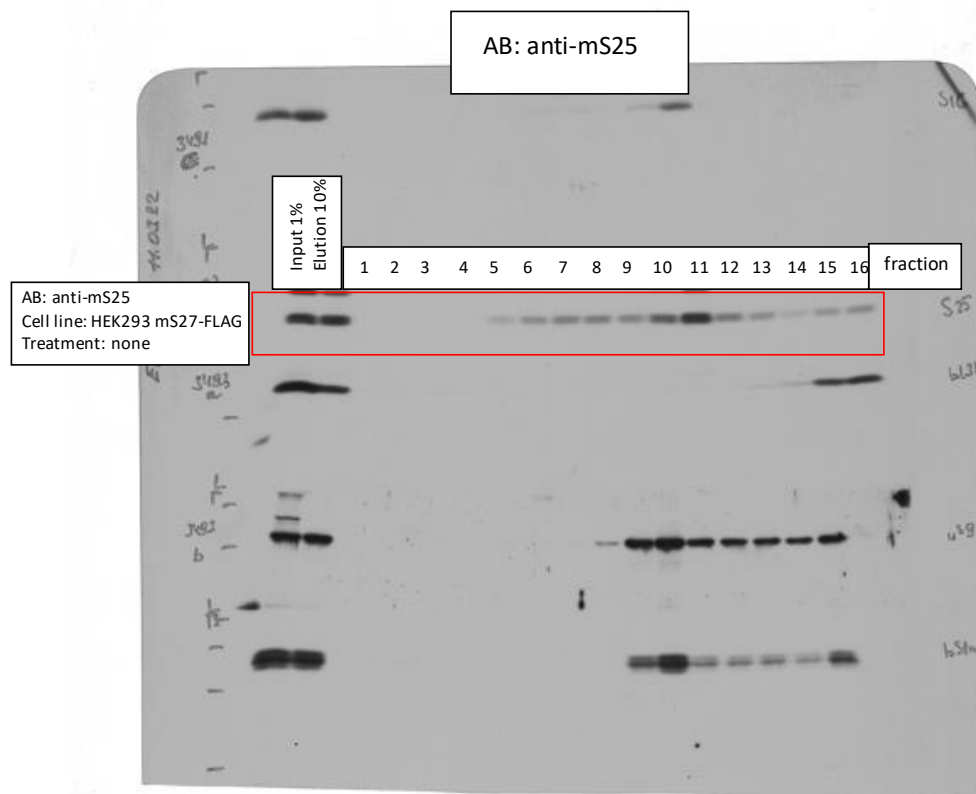

Source Data 2\_related to Extended Data Fig.3a

EL#349 mS27-FLAG IP + Gradient

Rotor: SW41 Ti

Gradient: Sucrose 5-30%

Speed: 158.000xg

Time: 15h

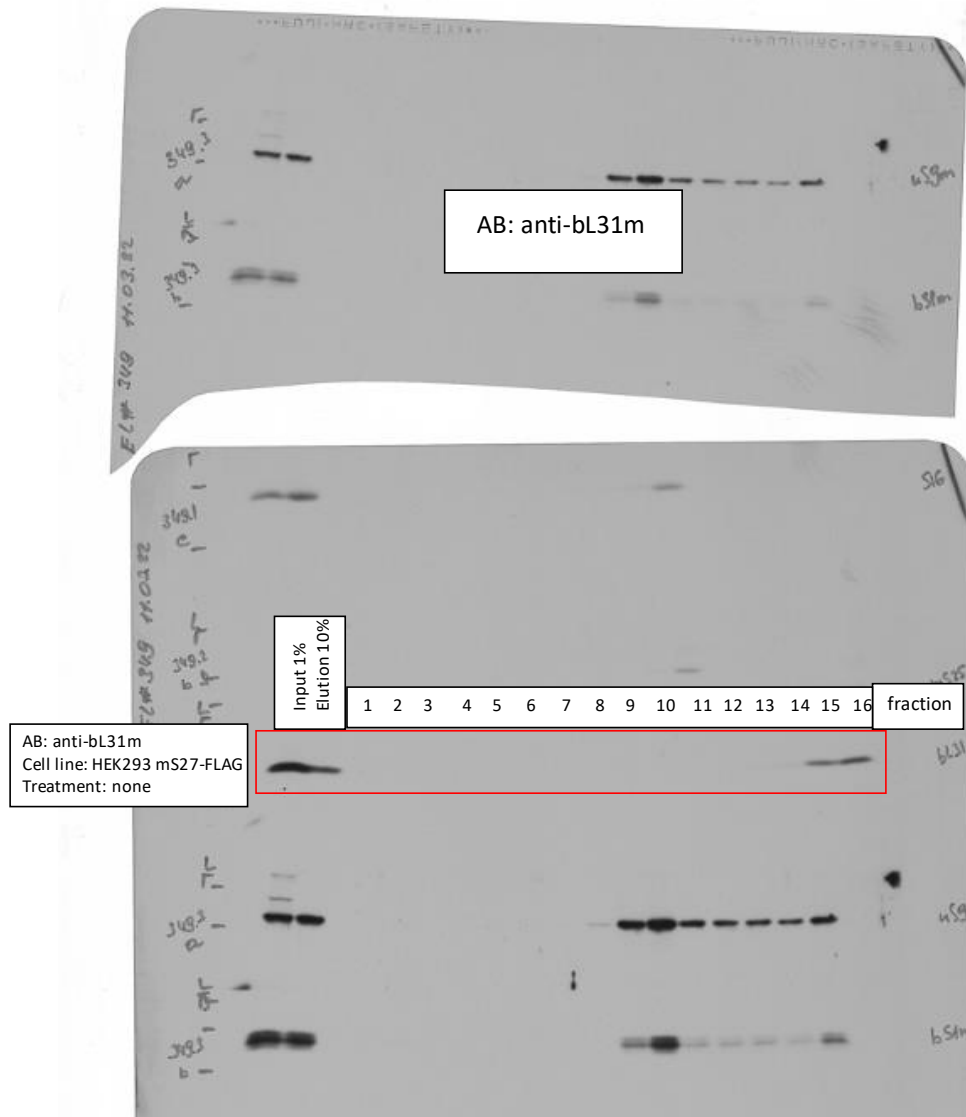

Source Data 2\_related to Extended Data Fig.3b

EL#373 mS25-FLAG IP + Gradient

Rotor: SW41 Ti

Gradient: Sucrose 5-30%

Speed: 158.000xg

Time: 15h

AB: anti-mS25

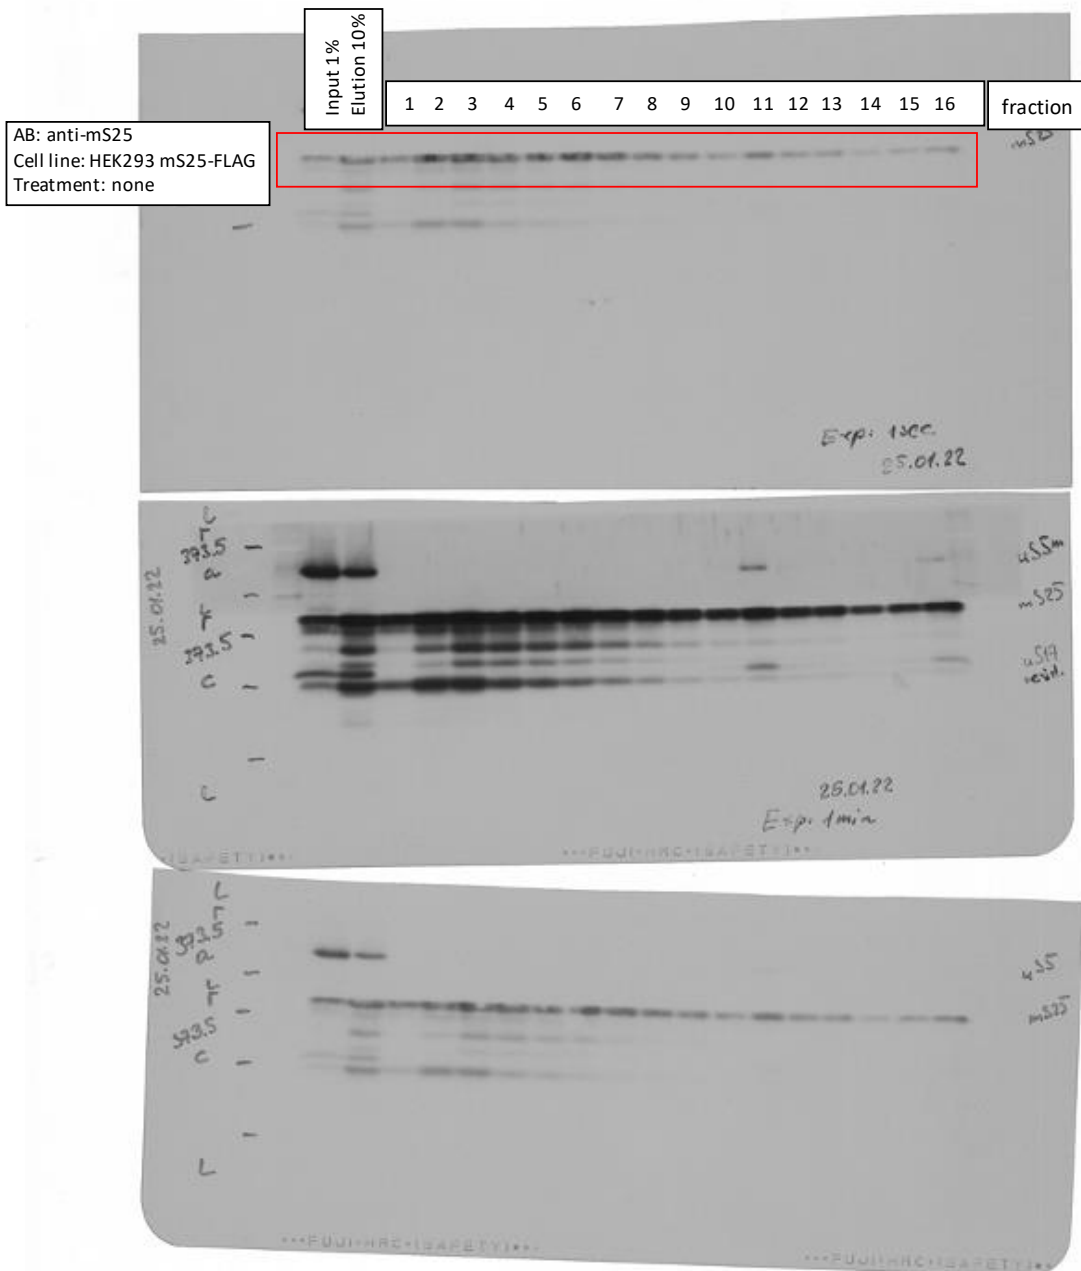

Source Data 2\_related to Extended Data Fig.3b

EL#373 mS25-FLAG IP + Gradient

Rotor: SW41 Ti

Gradient: Sucrose 5-30%

Speed: 158.000xg

Time: 15h

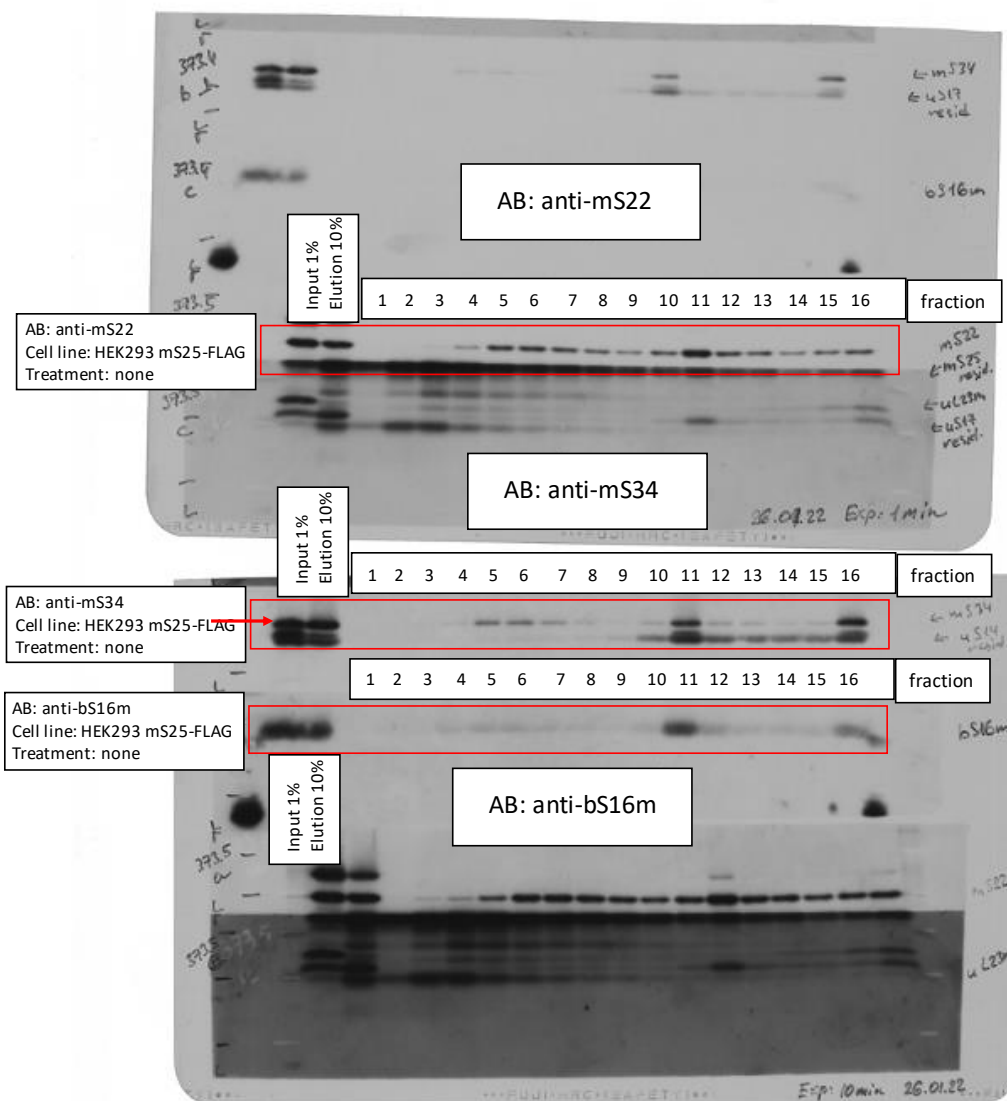



Source Data 2\_related to Extended Data Fig.3b

EL#373 mS25-FLAG IP + Gradient

Rotor: SW41 Ti

Gradient: Sucrose 5-30%

Speed: 158.000xg

Time: 15h

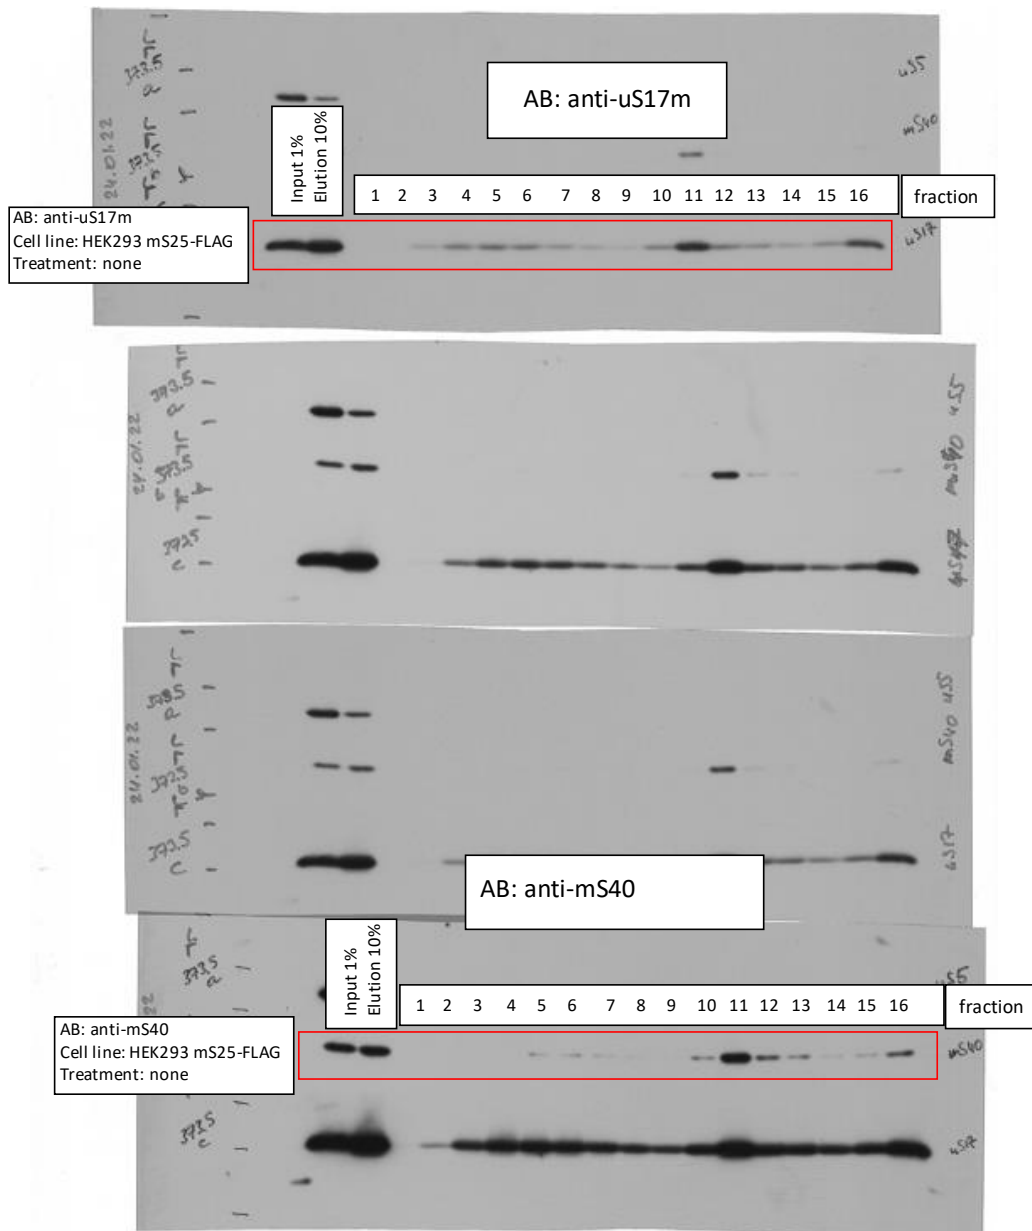

Source Data 2\_related to Extended Data Fig.3b

EL#373 mS25-FLAG IP + Gradient

Rotor: SW41 Ti

Gradient: Sucrose 5-30%

Speed: 158.000xg

Time: 15h

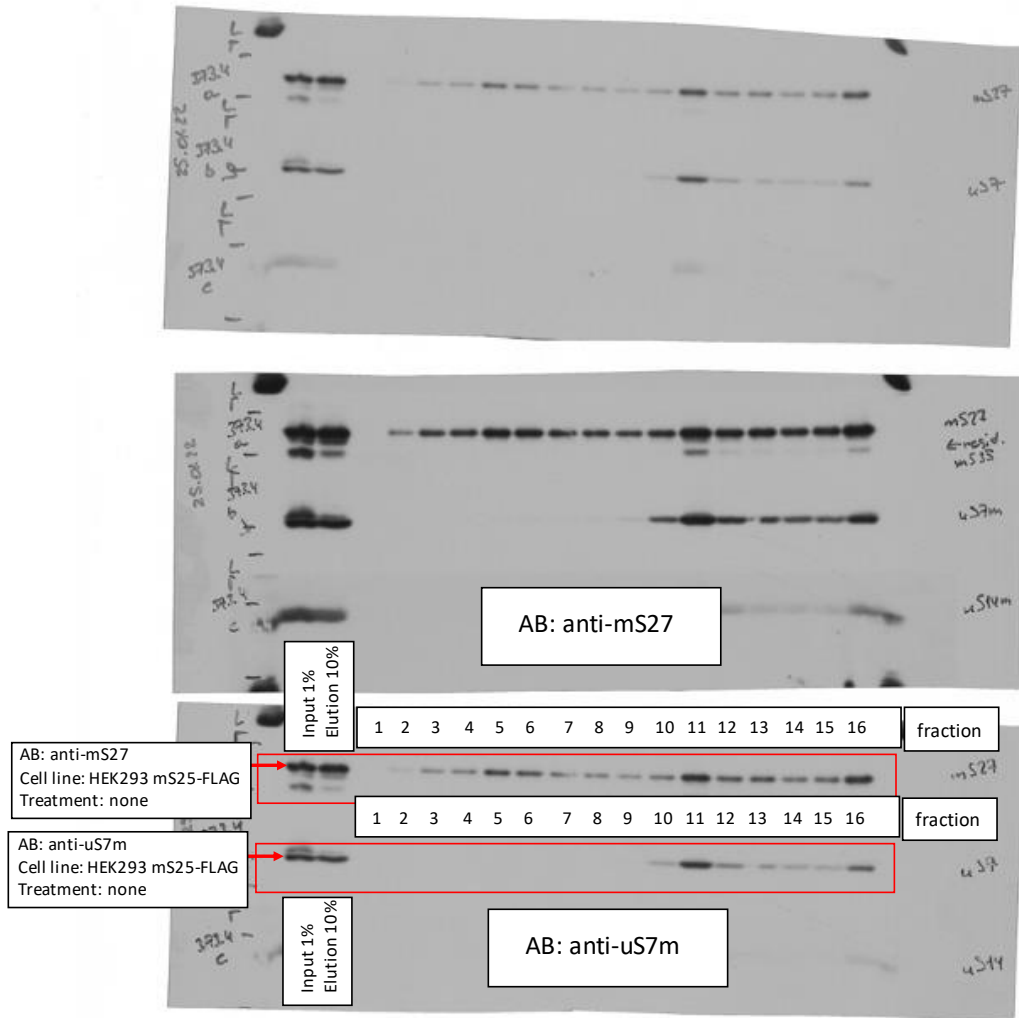

Source Data 2\_related to Extended Data Fig.3b

EL#373 mS25-FLAG IP + Gradient

Rotor: SW41 Ti

Gradient: Sucrose 5-30%

Speed: 158.000xg

Time: 15h

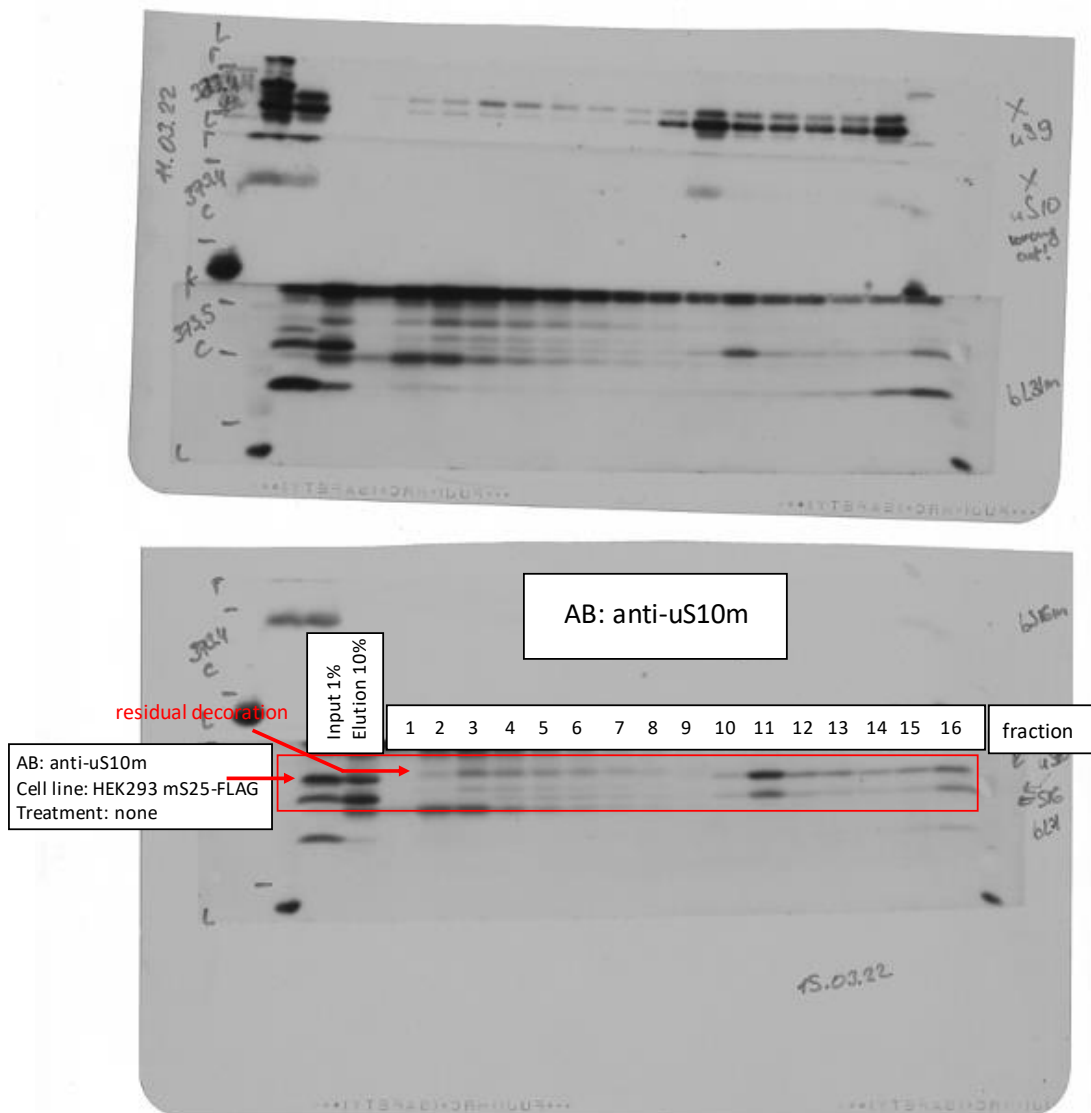

Source Data 2\_related to Extended Data Fig.3b

EL#373 mS25-FLAG IP + Gradient

Rotor: SW41 Ti

Gradient: Sucrose 5-30%

Speed: 158.000xg

Time: 15h

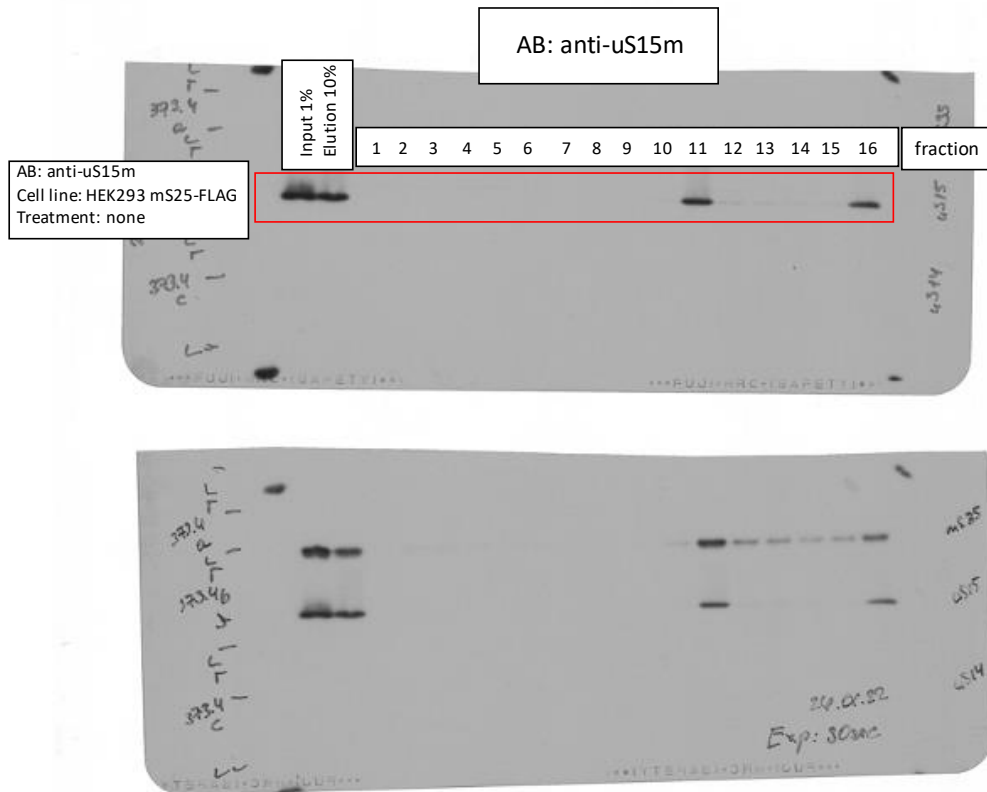

Source Data 2\_related to Extended Data Fig.3b

EL#373 mS25-FLAG IP + Gradient

Rotor: SW41 Ti

Gradient: Sucrose 5-30%

Speed: 158.000xg

Time: 15h

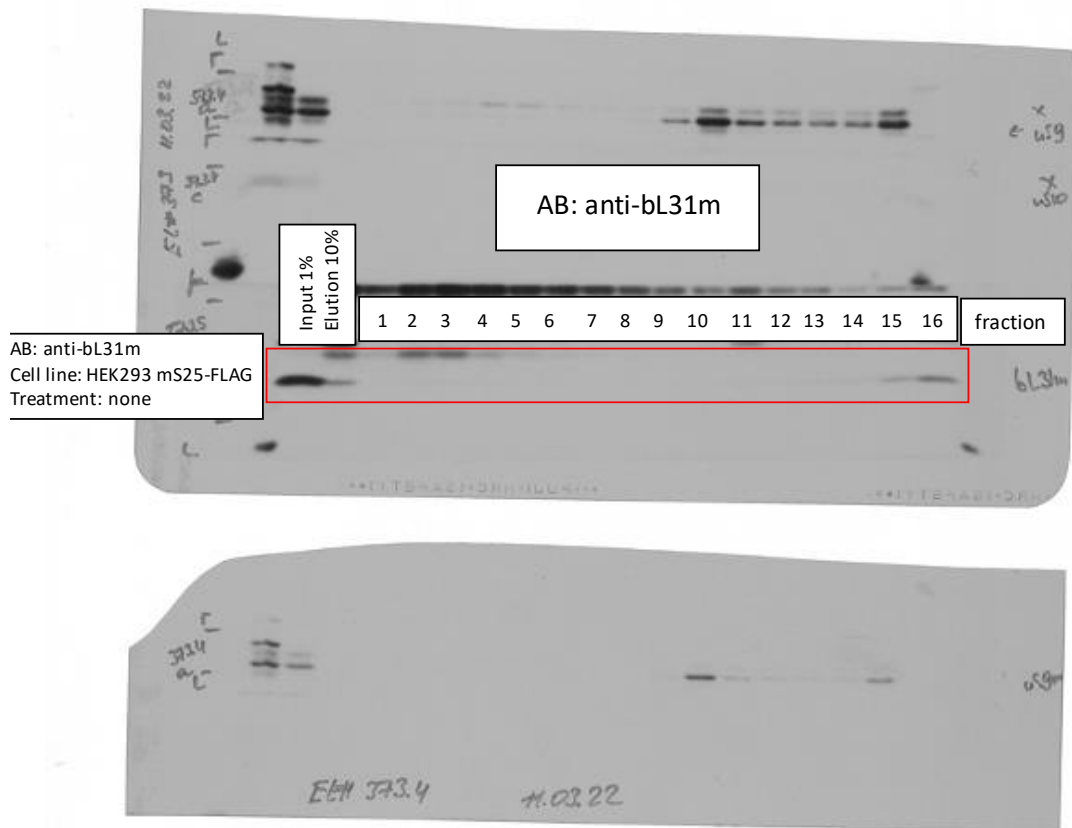

Source Data 2\_related to Extended Data Fig.3b

EL#373 mS25-FLAG IP + Gradient

Rotor: SW41 Ti

Gradient: Sucrose 5-30%

Speed: 158.000xg

Time: 15h

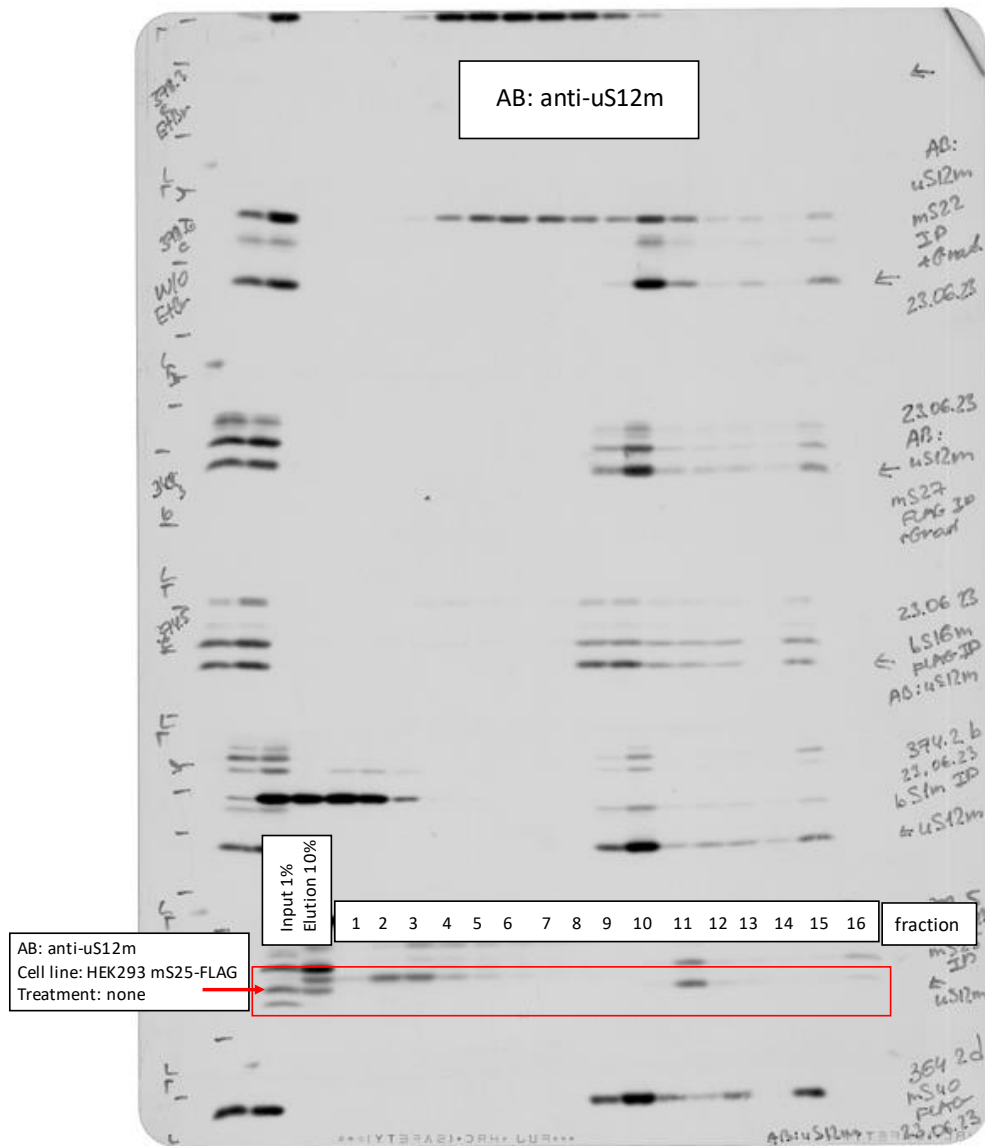

Source Data 2\_related to Extended Data Fig.3c

EL#364 mS40-FLAG IP + Gradient

Rotor: SW41 Ti

Gradient: Sucrose 5-30%

Speed: 158.000xg

Time: 15h

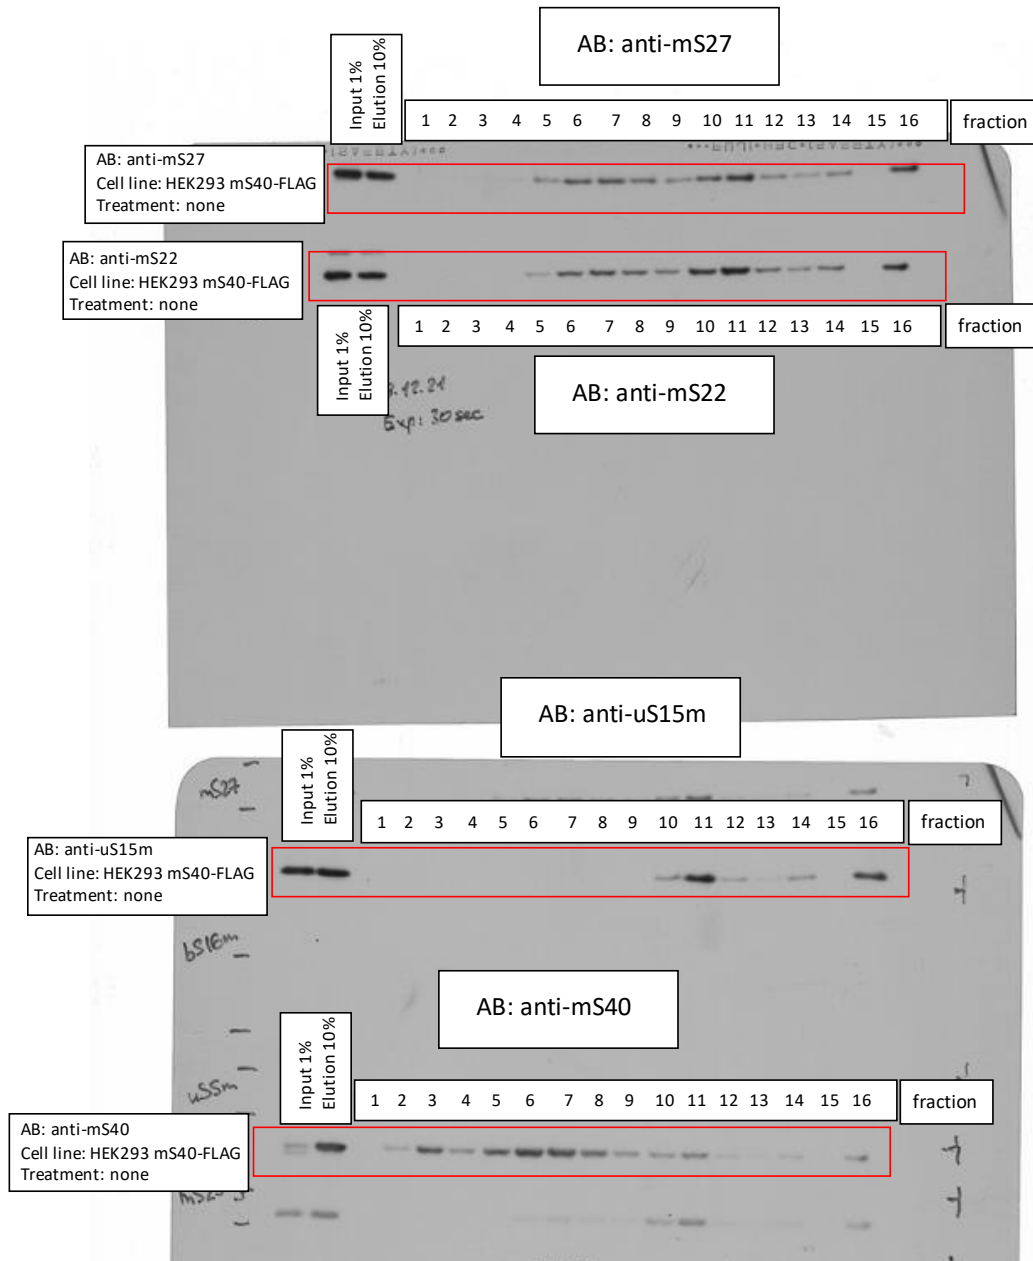

Source Data 2\_related to Extended Data Fig.3c

EL#364 mS40-FLAG IP + Gradient

Rotor: SW41 Ti

Gradient: Sucrose 5-30%

Speed: 158.000xg

Time: 15h

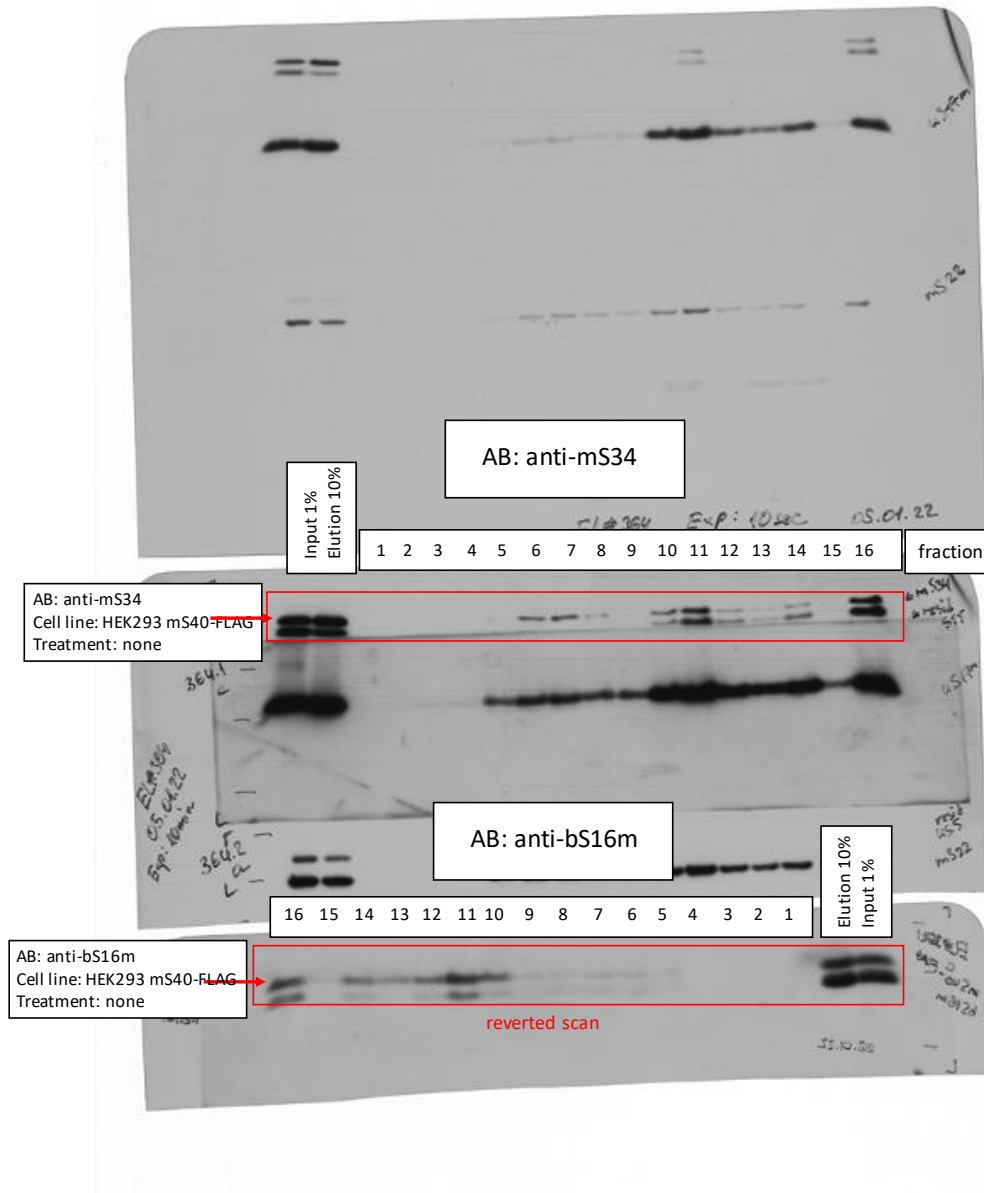



Source Data 2\_related to Extended Data Fig.3c

EL#364 mS40-FLAG IP + Gradient

Rotor: SW41 Ti

Gradient: Sucrose 5-30%

Speed: 158.000xg

Time: 15h

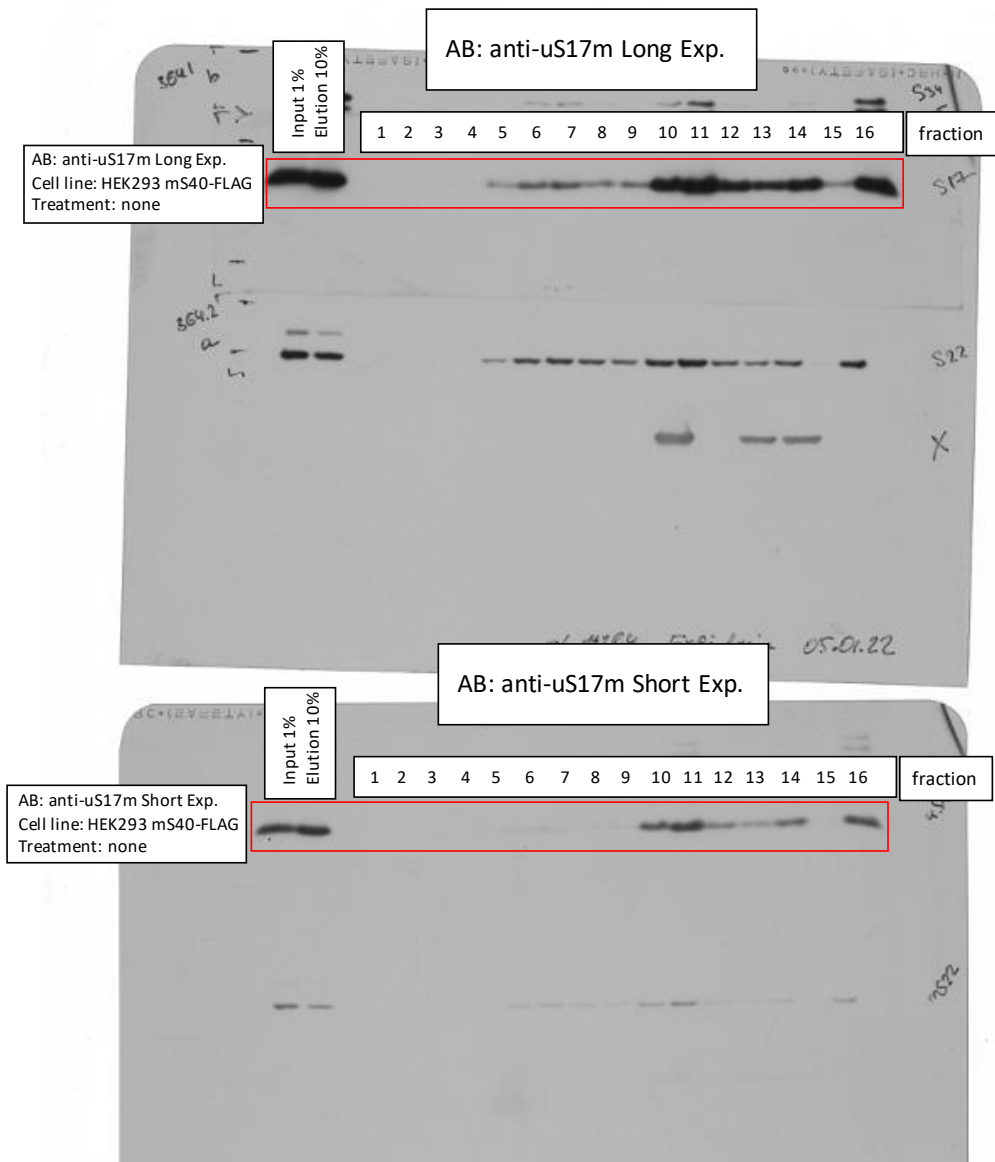

Source Data 2\_related to Extended Data Fig.3c

EL#364 mS40-FLAG IP + Gradient

Rotor: SW41 Ti

Gradient: Sucrose 5-30%

Speed: 158.000xg

Time: 15h

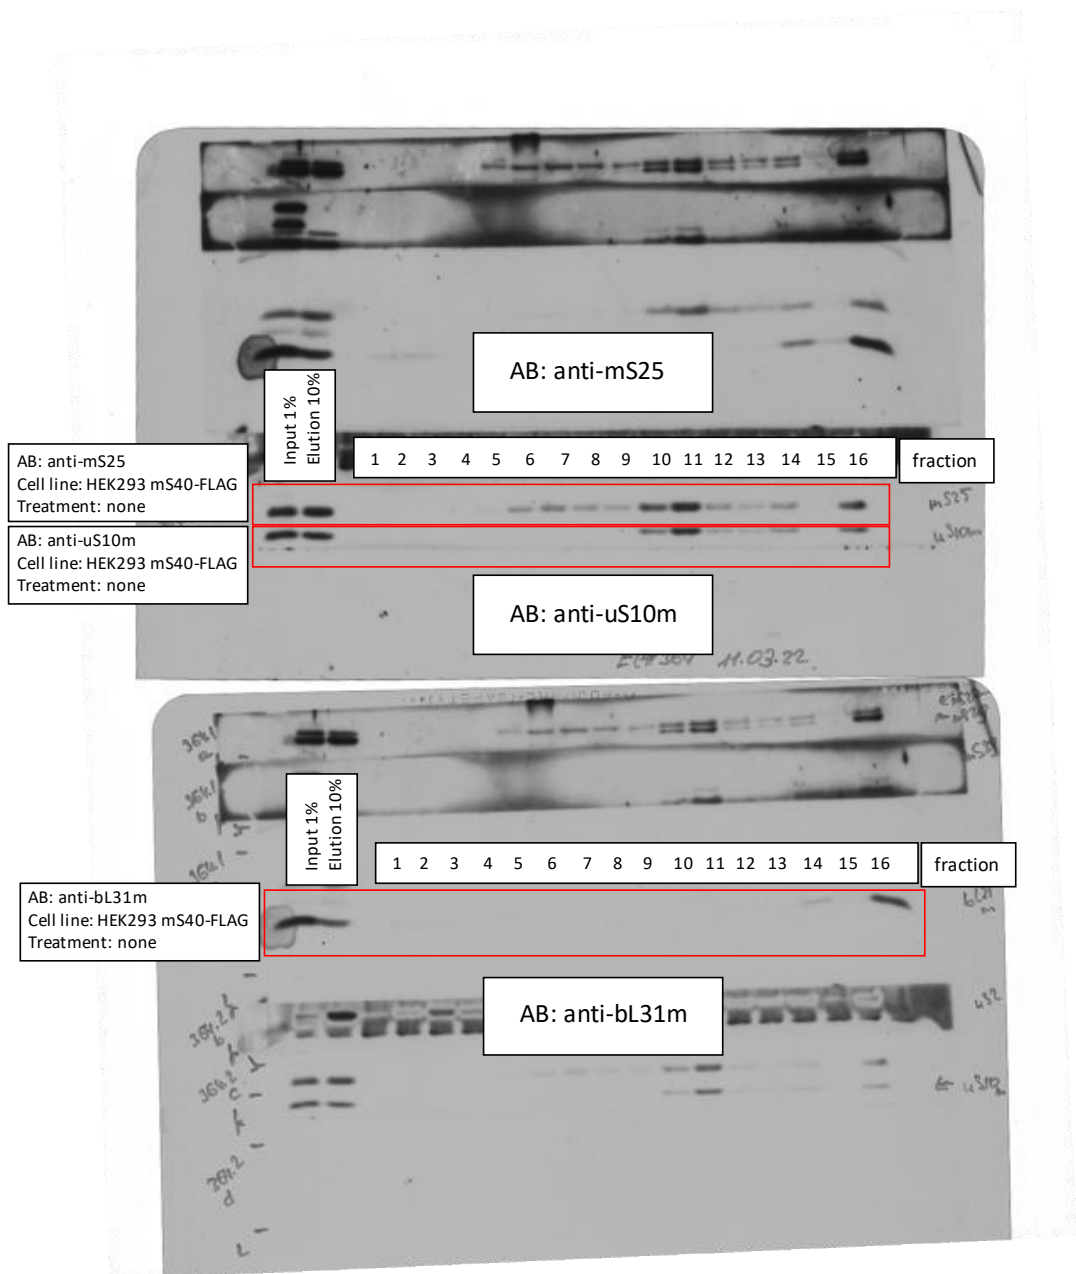

Source Data 2\_related to Extended Data Fig.3c

EL#364 mS40-FLAG IP + Gradient

Rotor: SW41 Ti

Gradient: Sucrose 5-30%

Speed: 158.000xg

Time: 15h

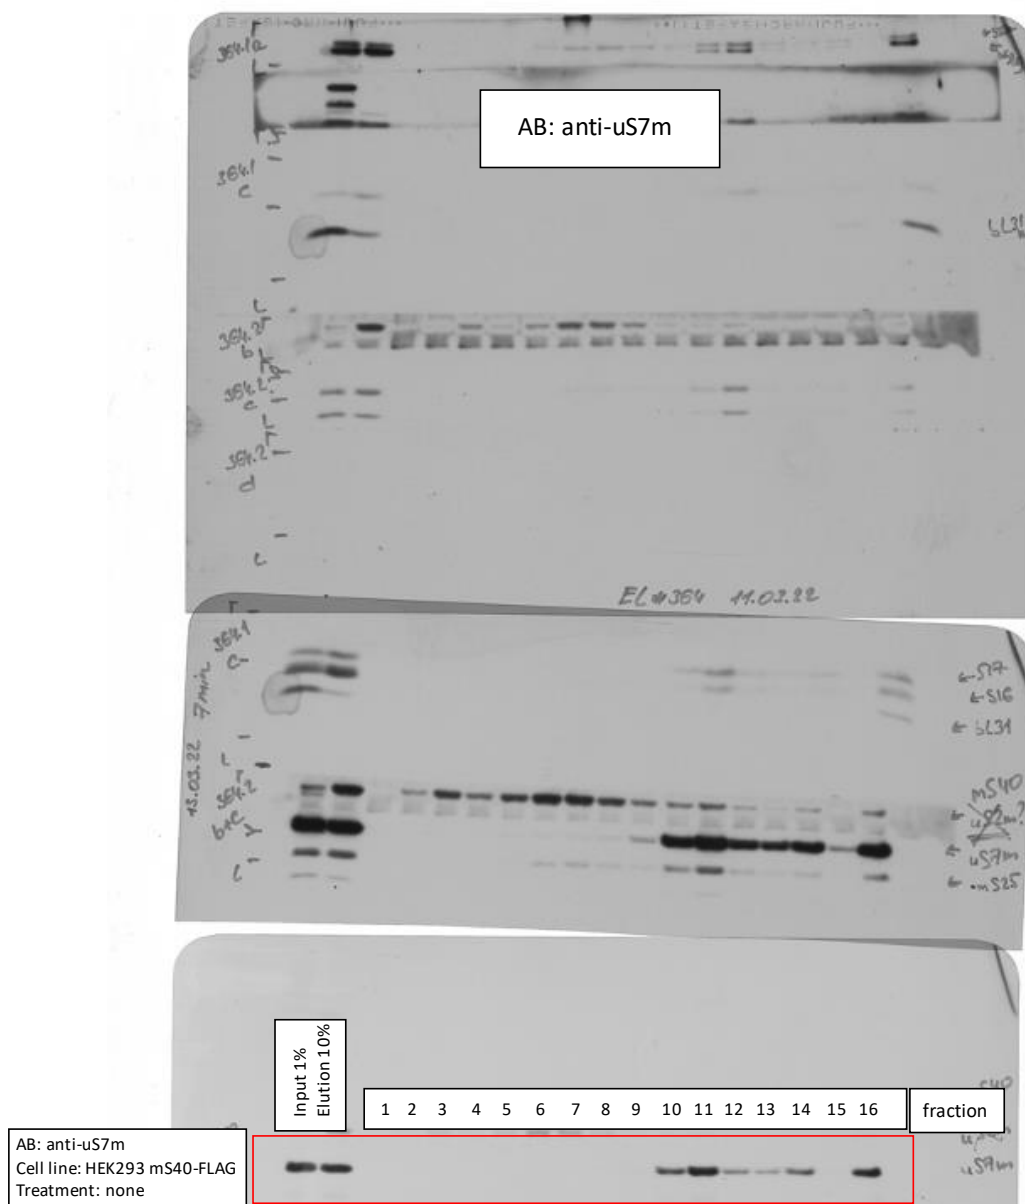

Source Data 2\_related to Extended Data Fig.3c

EL#364 mS40-FLAG IP + Gradient

Rotor: SW41 Ti

Gradient: Sucrose 5-30%

Speed: 158.000xg

Time: 15h

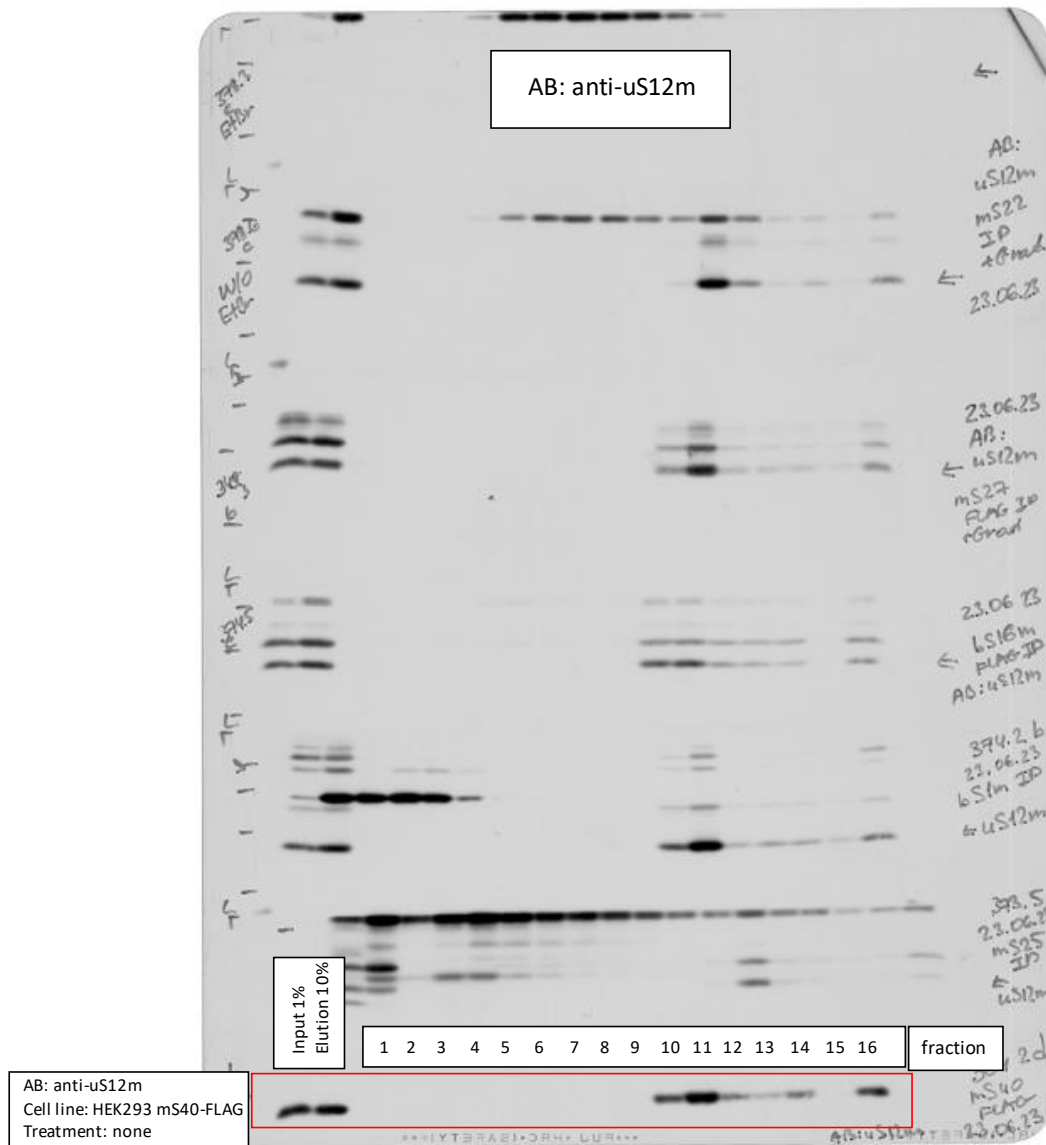

Source Data 2\_related to Extended Data Fig.3d

AS#117 mS40 KO + Gradient

Rotor: SW41 Ti

Gradient: Sucrose 5-30%

Speed: 158.000xg

Time: 15h

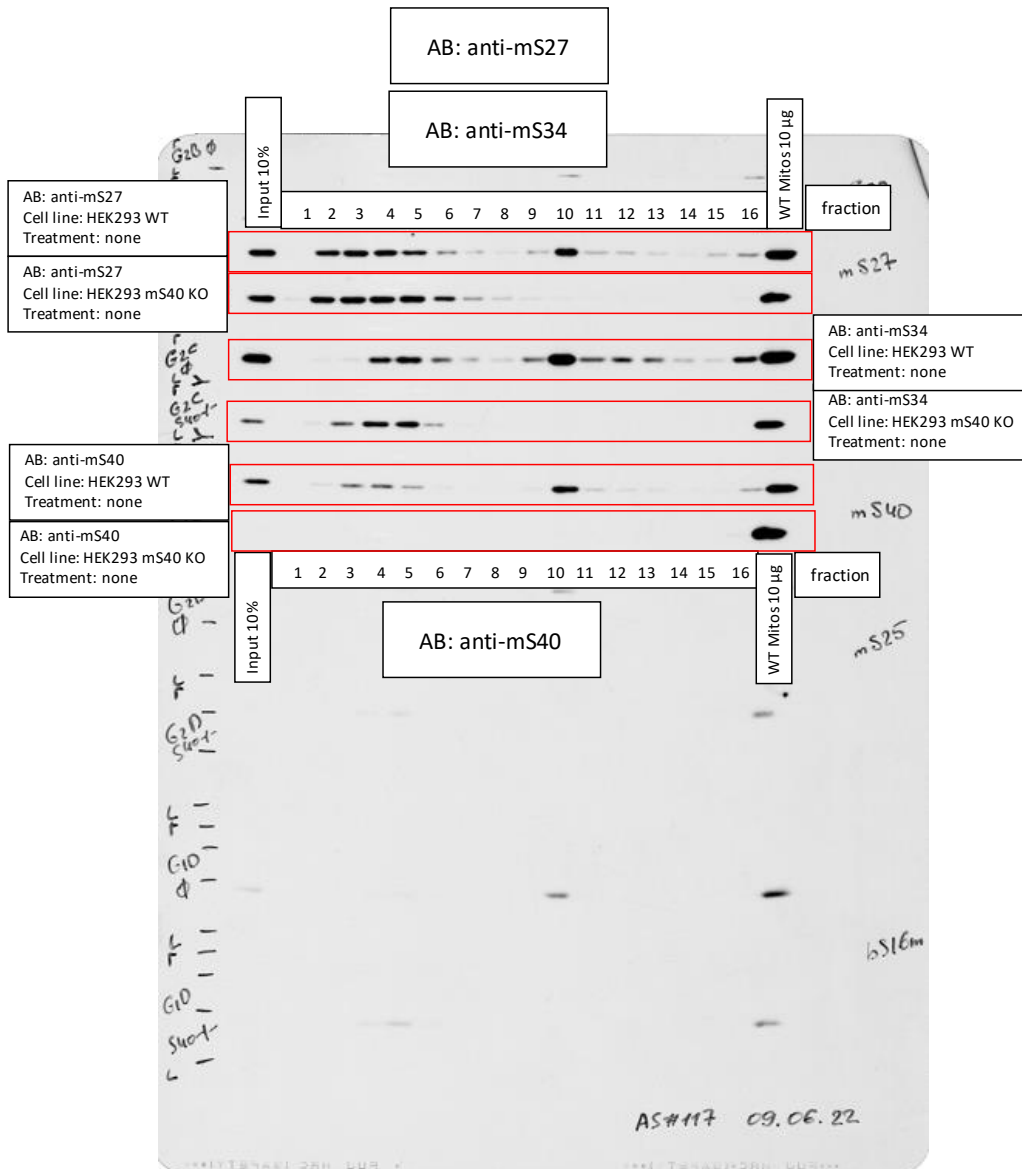

Source Data 2\_related to Extended Data Fig.3d

AS#117 mS40 KO + Gradient

Rotor: SW41 Ti

Gradient: Sucrose 5-30%

Speed: 158.000xg

Time: 15h

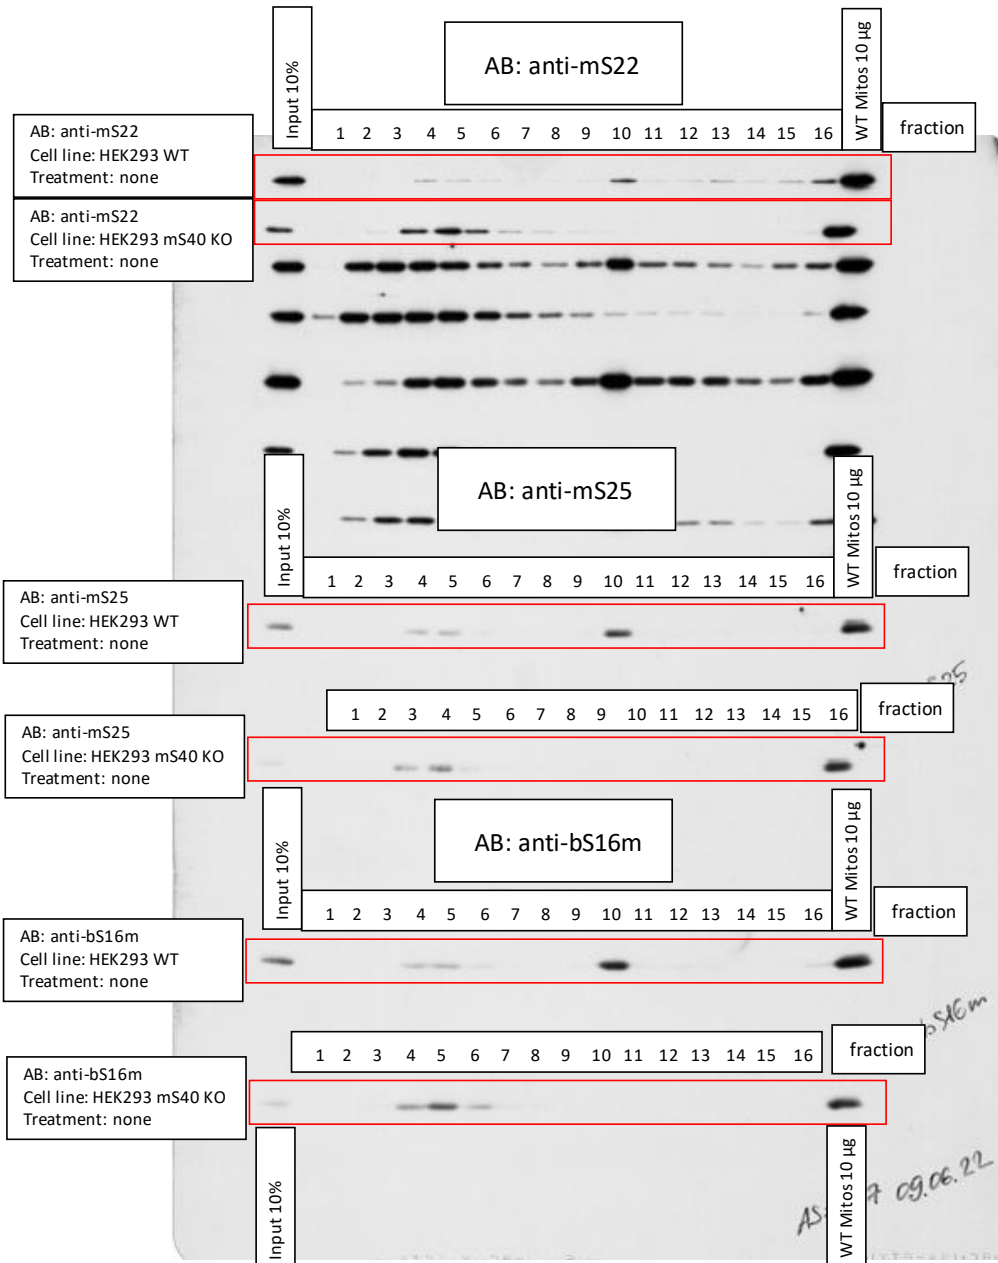

Source Data 2\_related to Extended Data Fig.3d

AS#117 mS40 KO + Gradient

Rotor: SW41 Ti

Gradient: Sucrose 5-30%

Speed: 158.000xg

Time: 15h

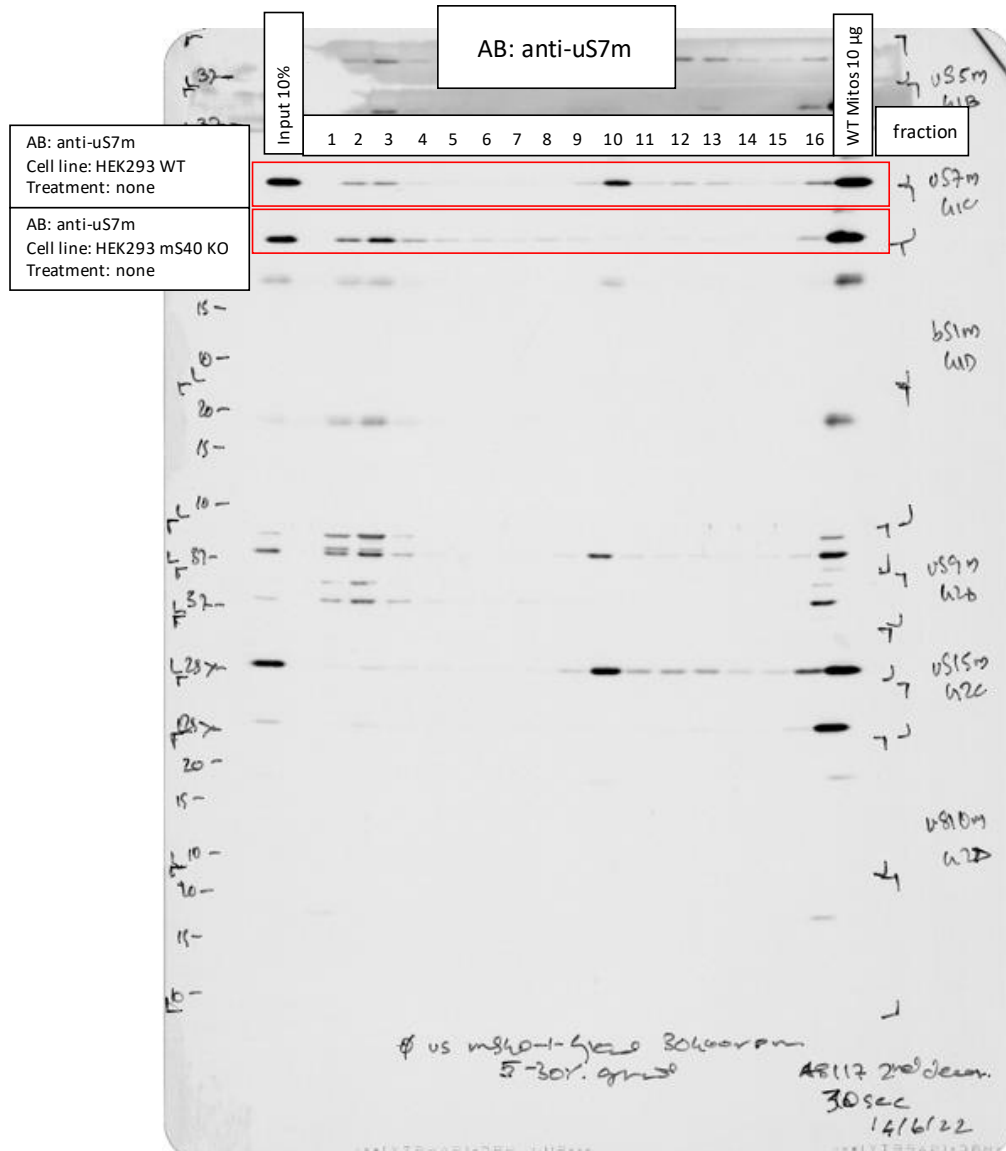

Source Data 2\_related to Extended Data Fig.3d

AS#117 mS40 KO + Gradient

Rotor: SW41 Ti

Gradient: Sucrose 5-30%

Speed: 158.000xg

Time: 15h

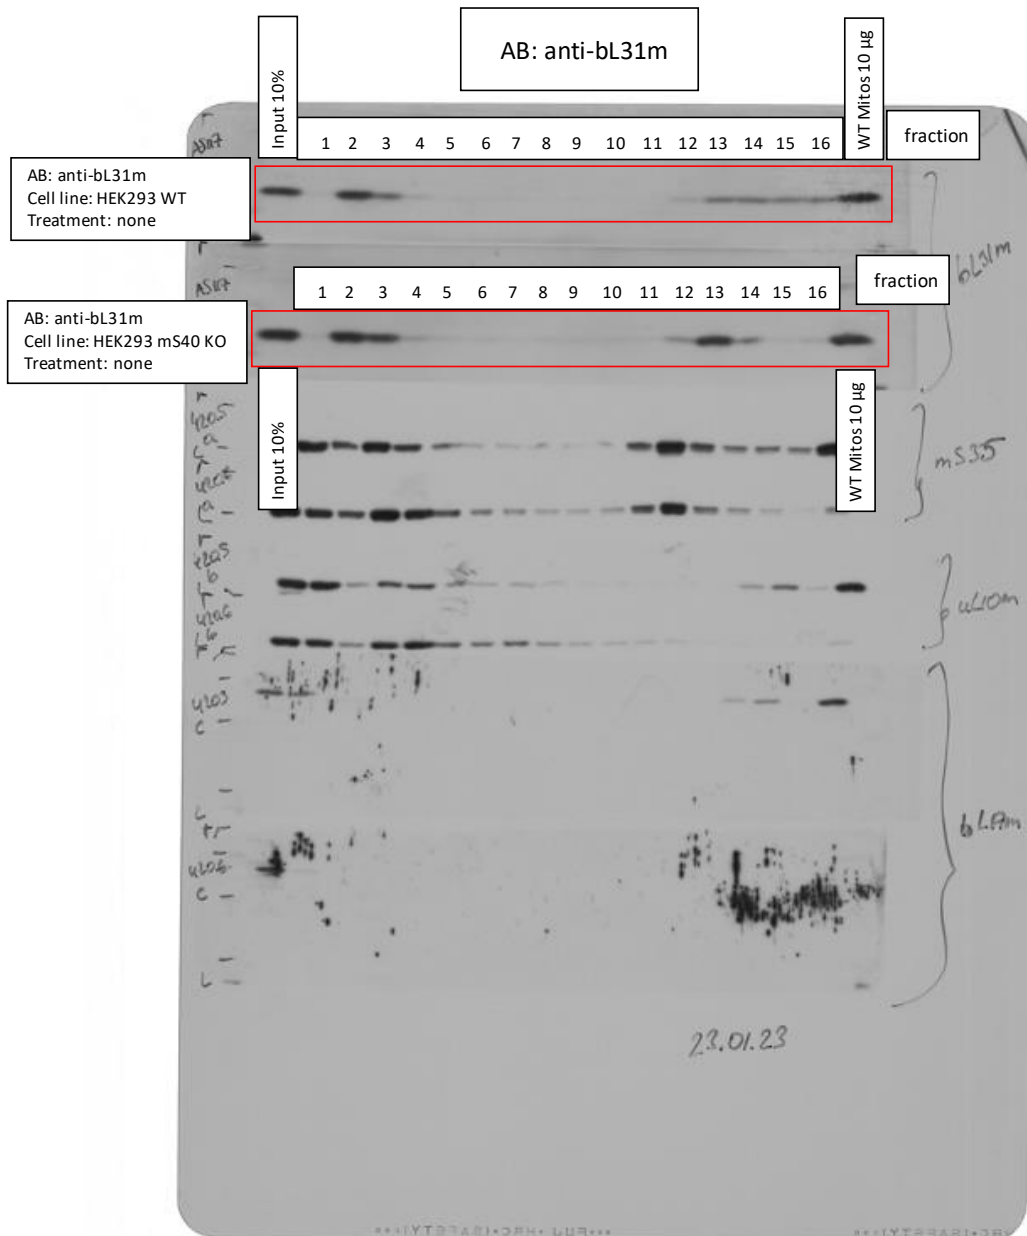



Source Data 2\_related to Extended Data Fig.3e

EL#374.1-3 bS1m-FLAG IP + Gradient

Rotor: SW41 Ti

Gradient: Sucrose 5-30%

Speed: 158.000xg

Time: 15h

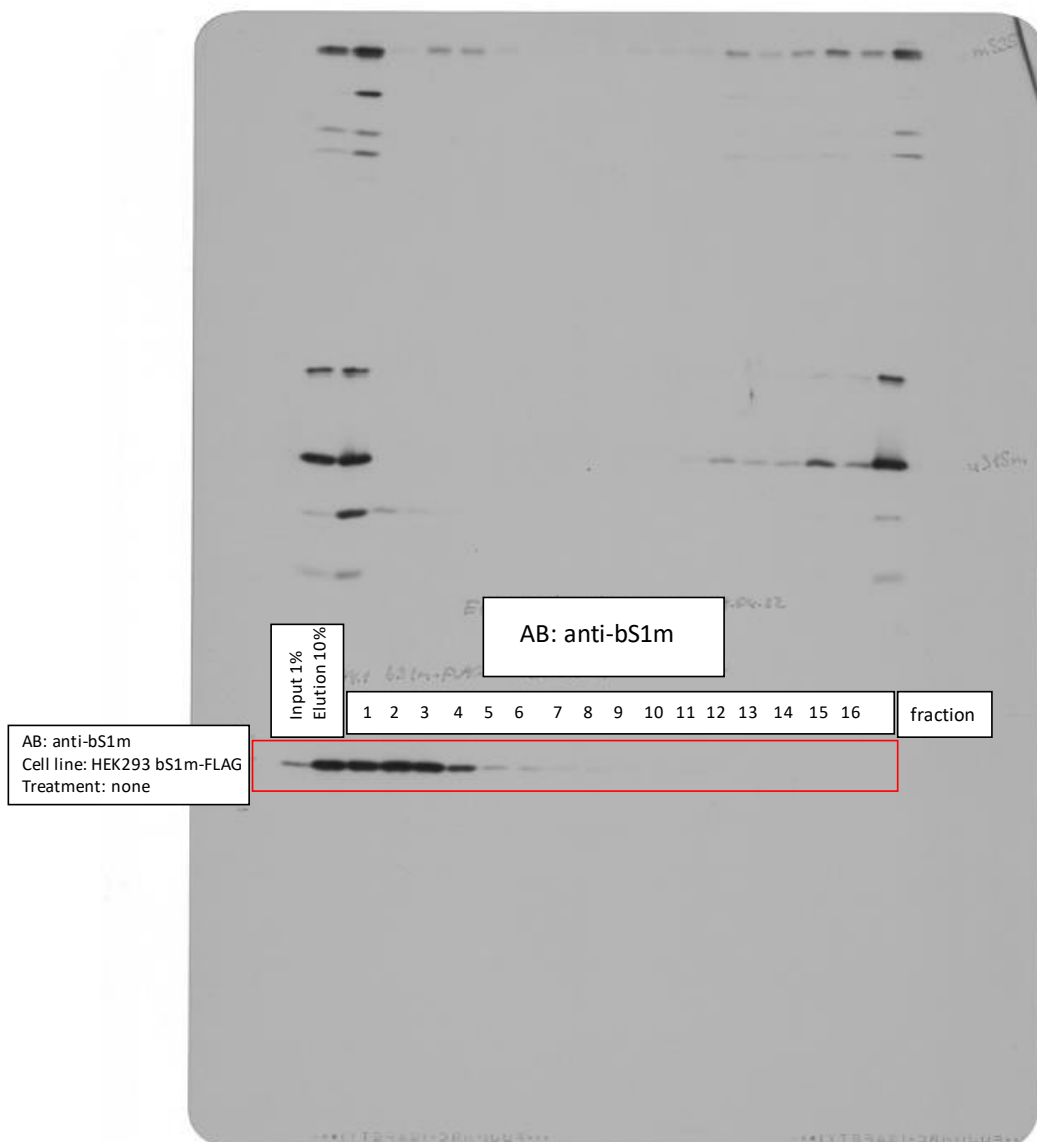

Source Data 2\_related to Extended Data Fig.3e

EL#374.1-3 bS1m-FLAG IP + Gradient

Rotor: SW41 Ti

Gradient: Sucrose 5-30%

Speed: 158.000xg

Time: 15h

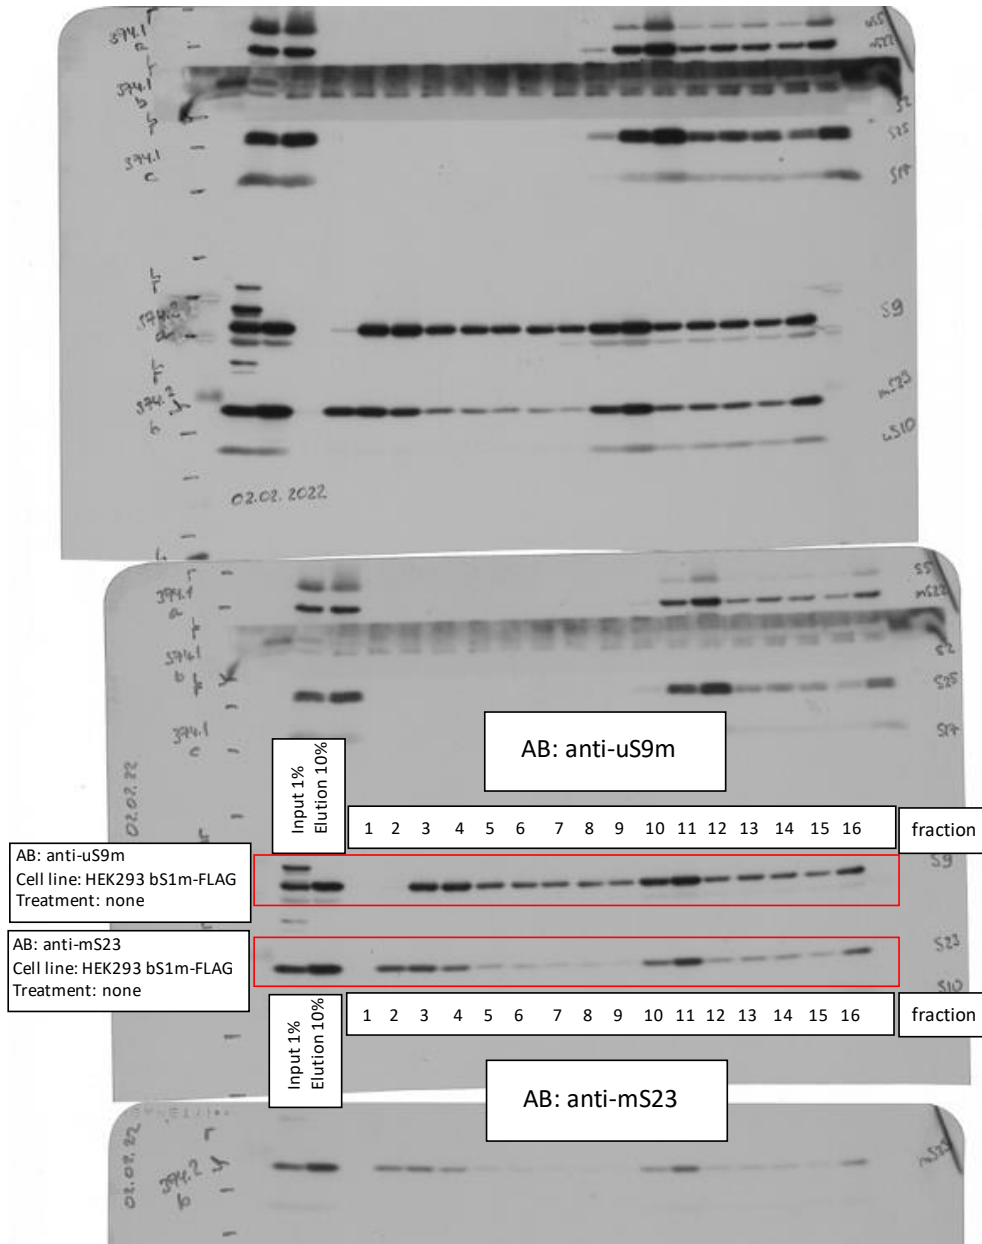

Source Data 2\_related to Extended Data Fig.3e

EL#374.1-3 bS1m-FLAG IP + Gradient

Rotor: SW41 Ti

Gradient: Sucrose 5-30%

Speed: 158.000xg

Time: 15h

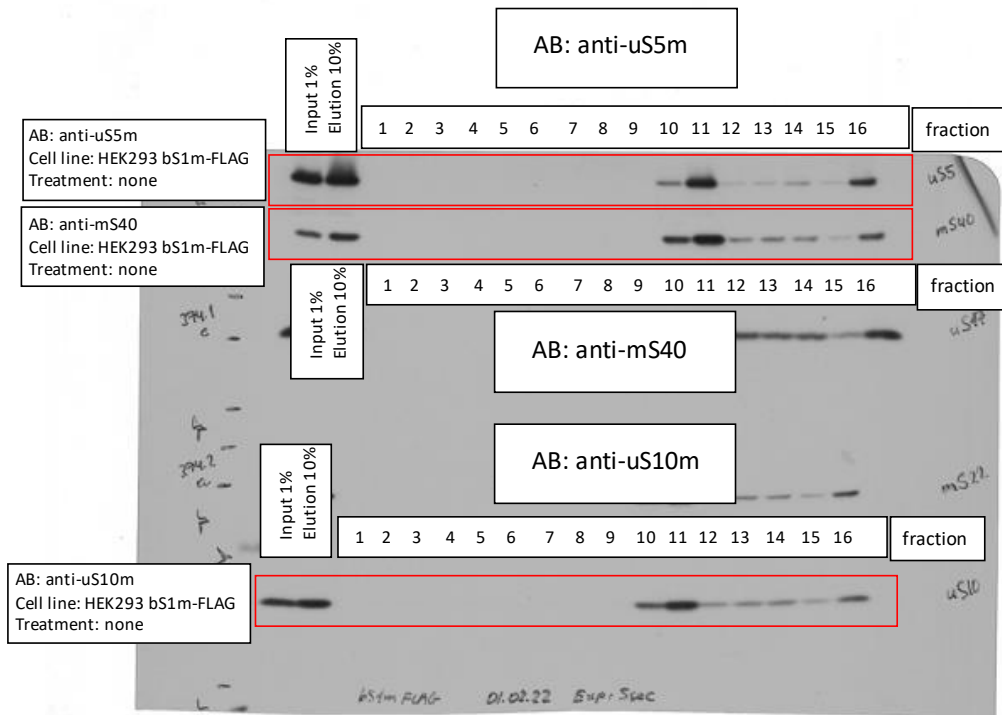

Source Data 2\_related to Extended Data Fig.3e

EL#374.1-3 bS1m-FLAG IP + Gradient

Rotor: SW41 Ti

Gradient: Sucrose 5-30%

Speed: 158.000xg

Time: 15h

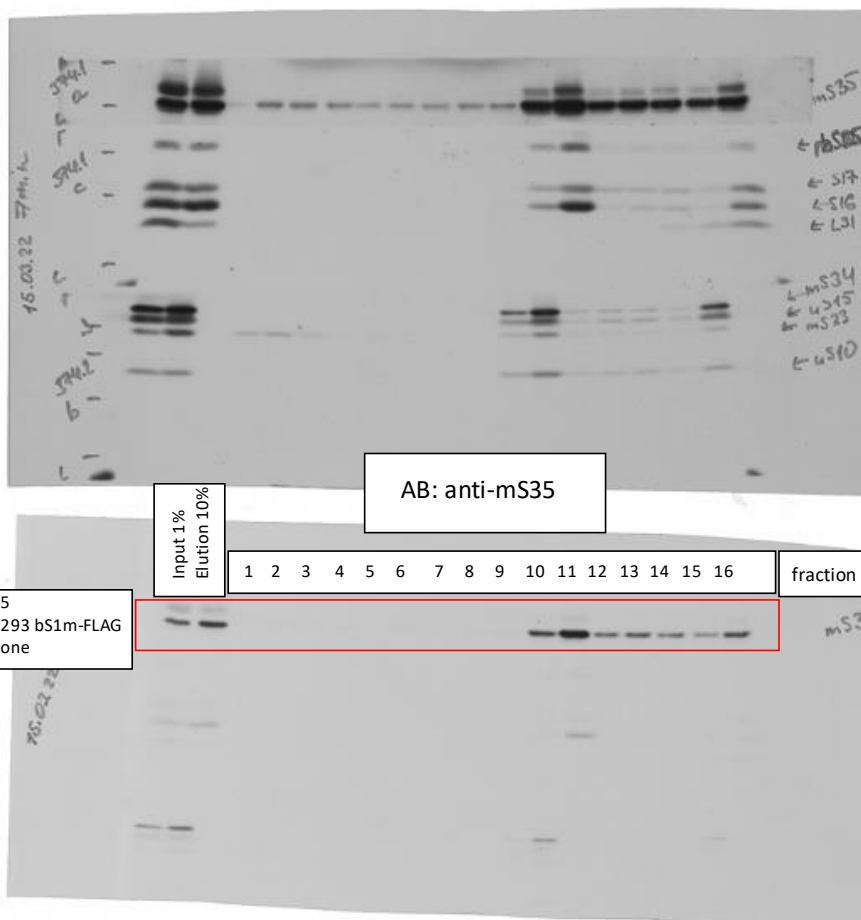

Source Data 2\_related to Extended Data Fig.3e

EL#374.1-3 bS1m-FLAG IP + Gradient

Rotor: SW41 Ti

Gradient: Sucrose 5-30%

Speed: 158.000xg

Time: 15h

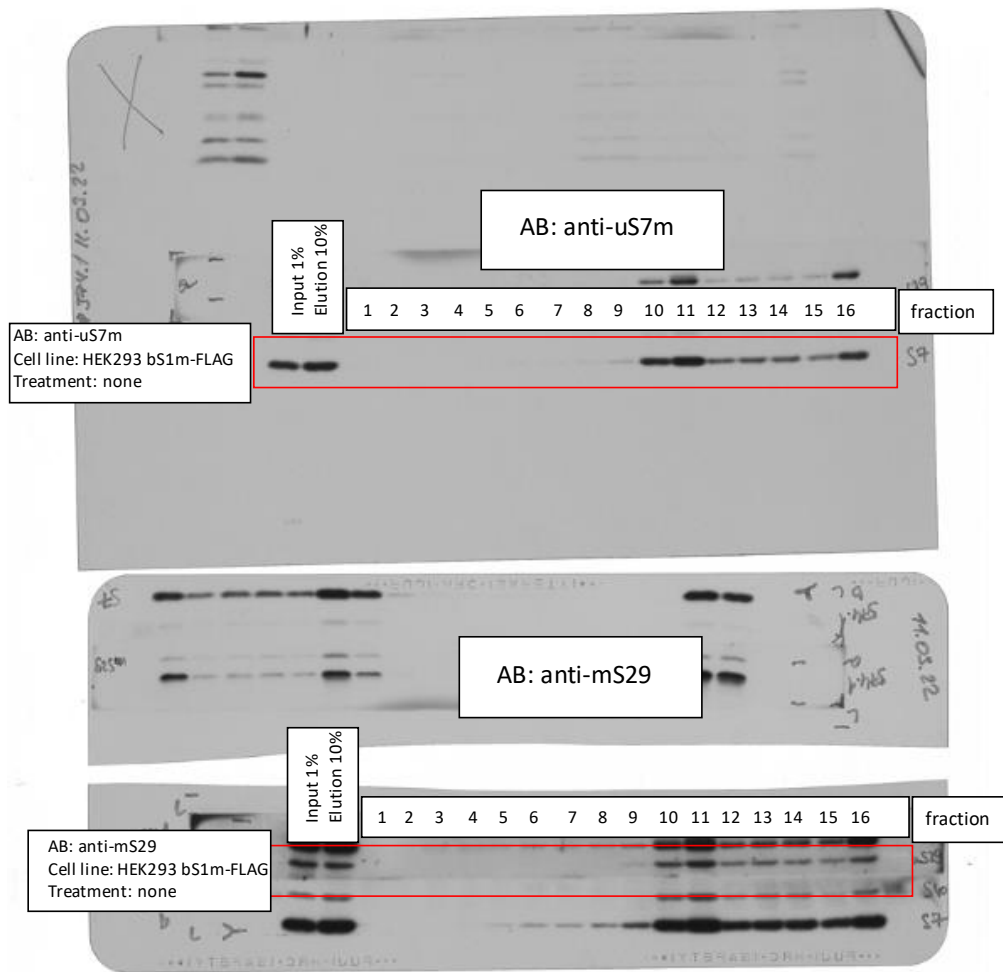

Source Data 2\_related to Extended Data Fig.3e

EL#374.1-3 bS1m-FLAG IP + Gradient

Rotor: SW41 Ti

Gradient: Sucrose 5-30%

Speed: 158.000xg

Time: 15h

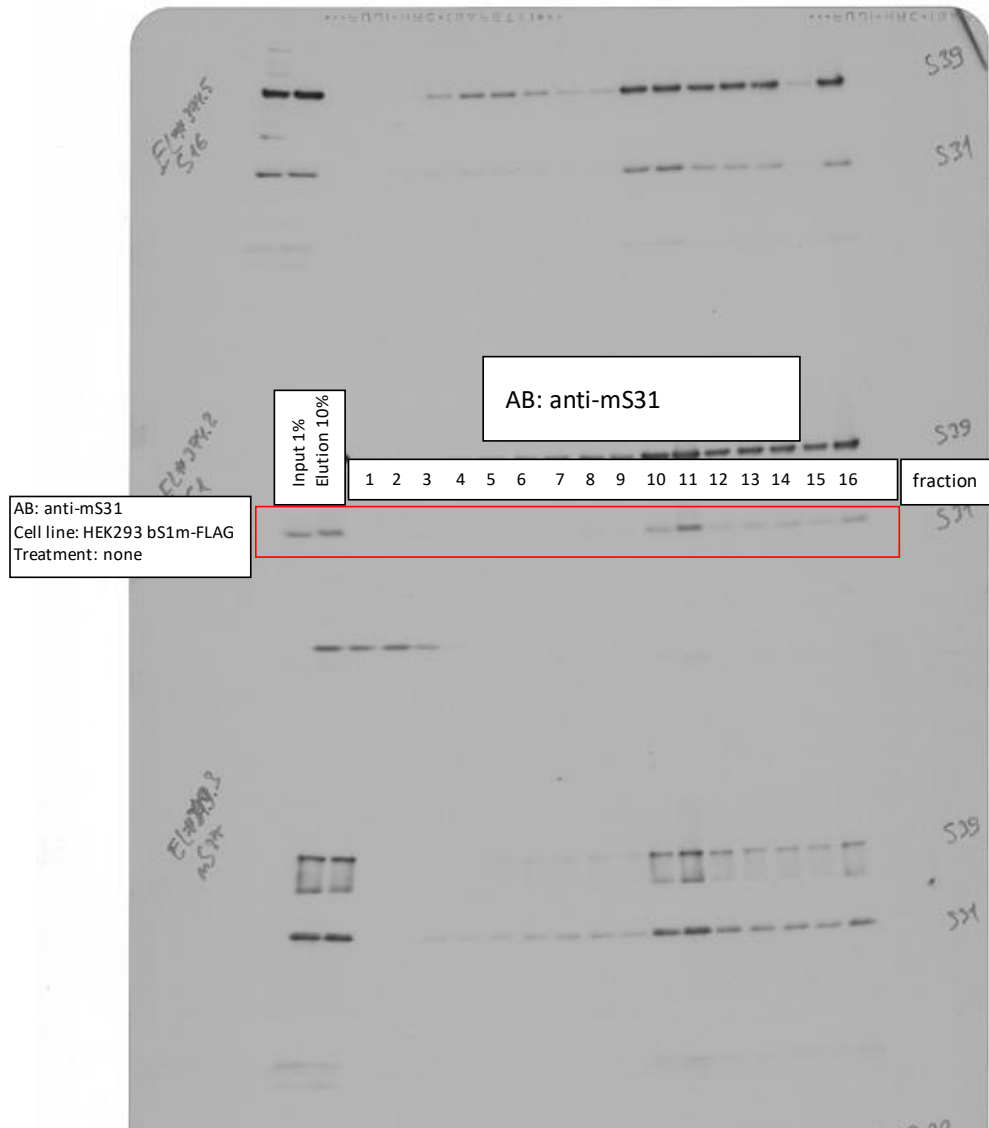

Source Data 2\_related to Extended Data Fig.3e

EL#374.1-3 bS1m-FLAG IP + Gradient

Rotor: SW41 Ti

Gradient: Sucrose 5-30%

Speed: 158.000xg

Time: 15h

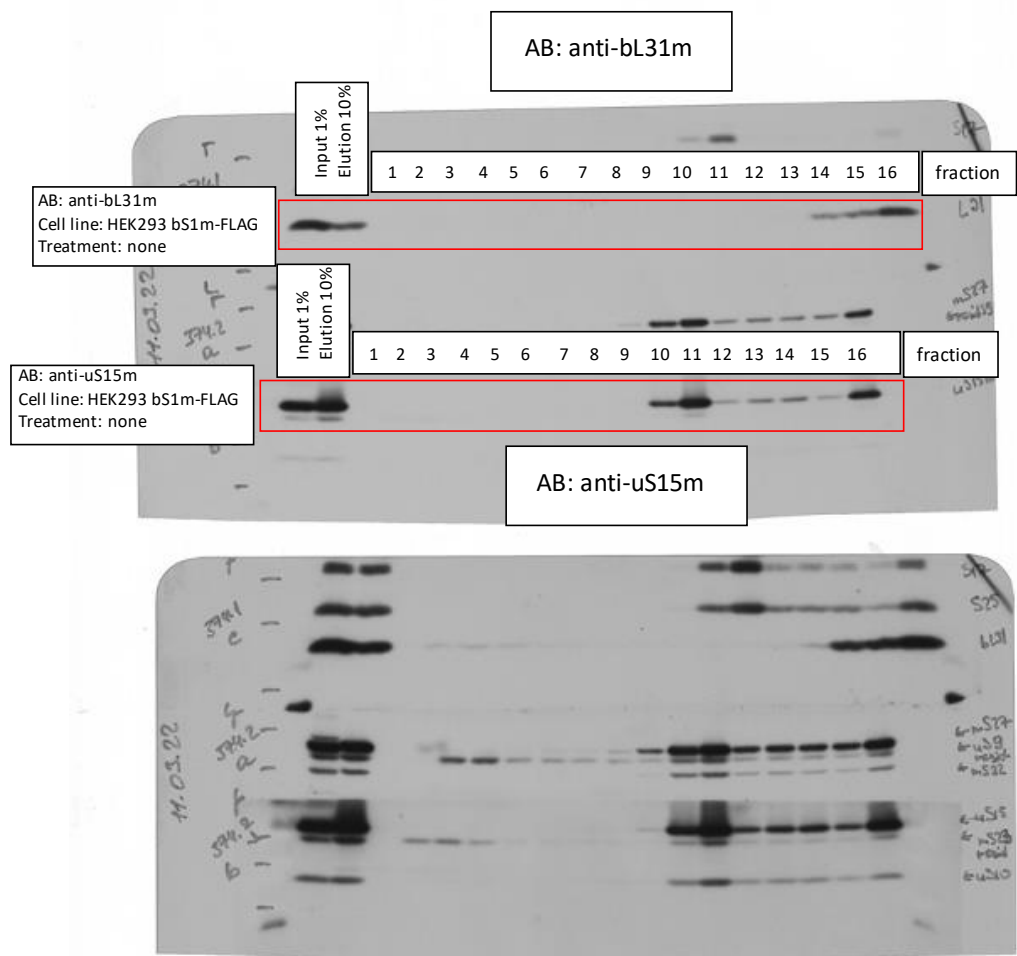

Source Data 2\_related to Extended Data Fig.3f

EL#392.1-2 uS10m-FLAG IP + Gradient

Rotor: SW41 Ti

Gradient: Sucrose 5-30%

Speed: 158.000xg

Time: 15h

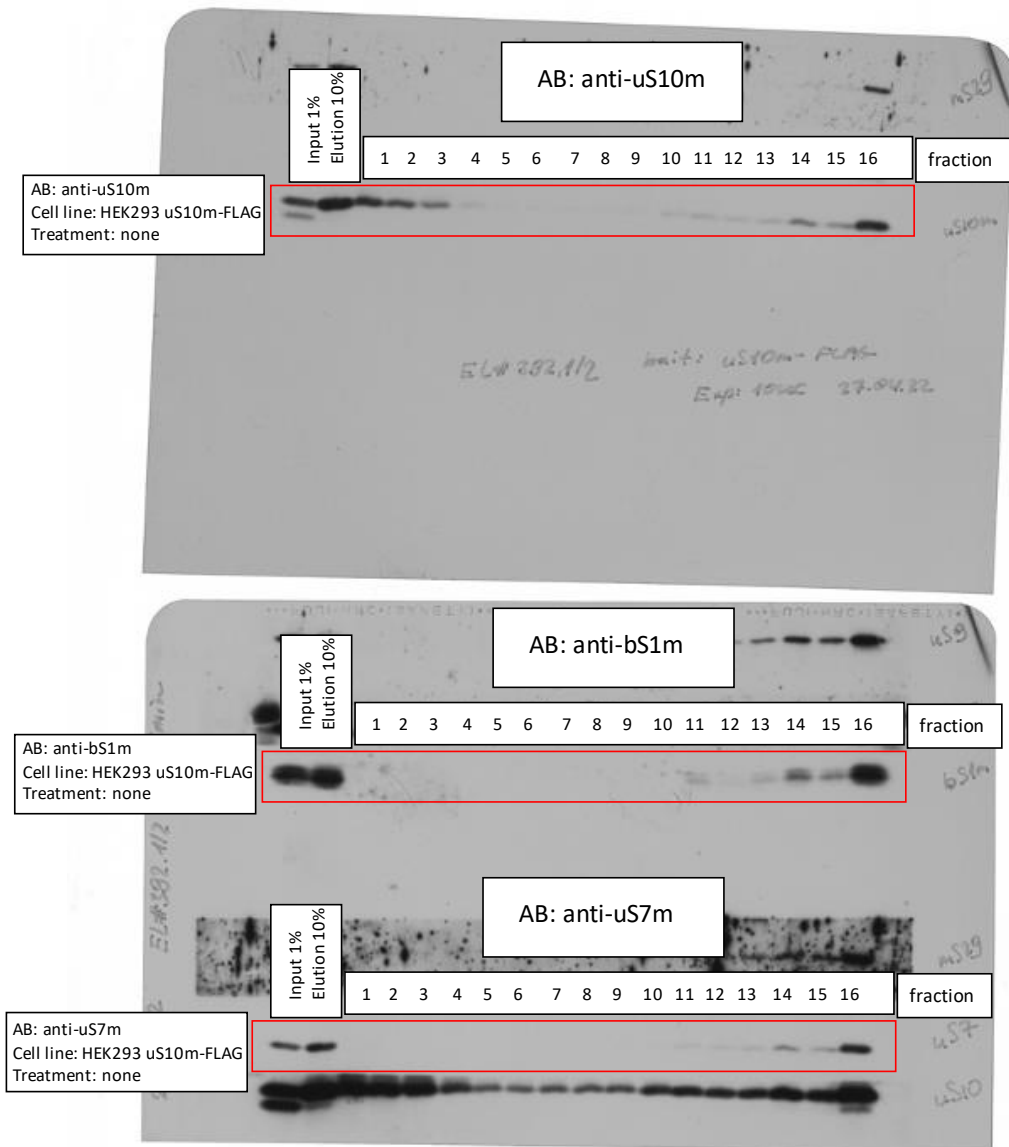



Source Data 2\_related to Extended Data Fig.3f

EL#392.1-2 uS10m-FLAG IP + Gradient

Rotor: SW41 Ti

Gradient: Sucrose 5-30%

Speed: 158.000xg

Time: 15h

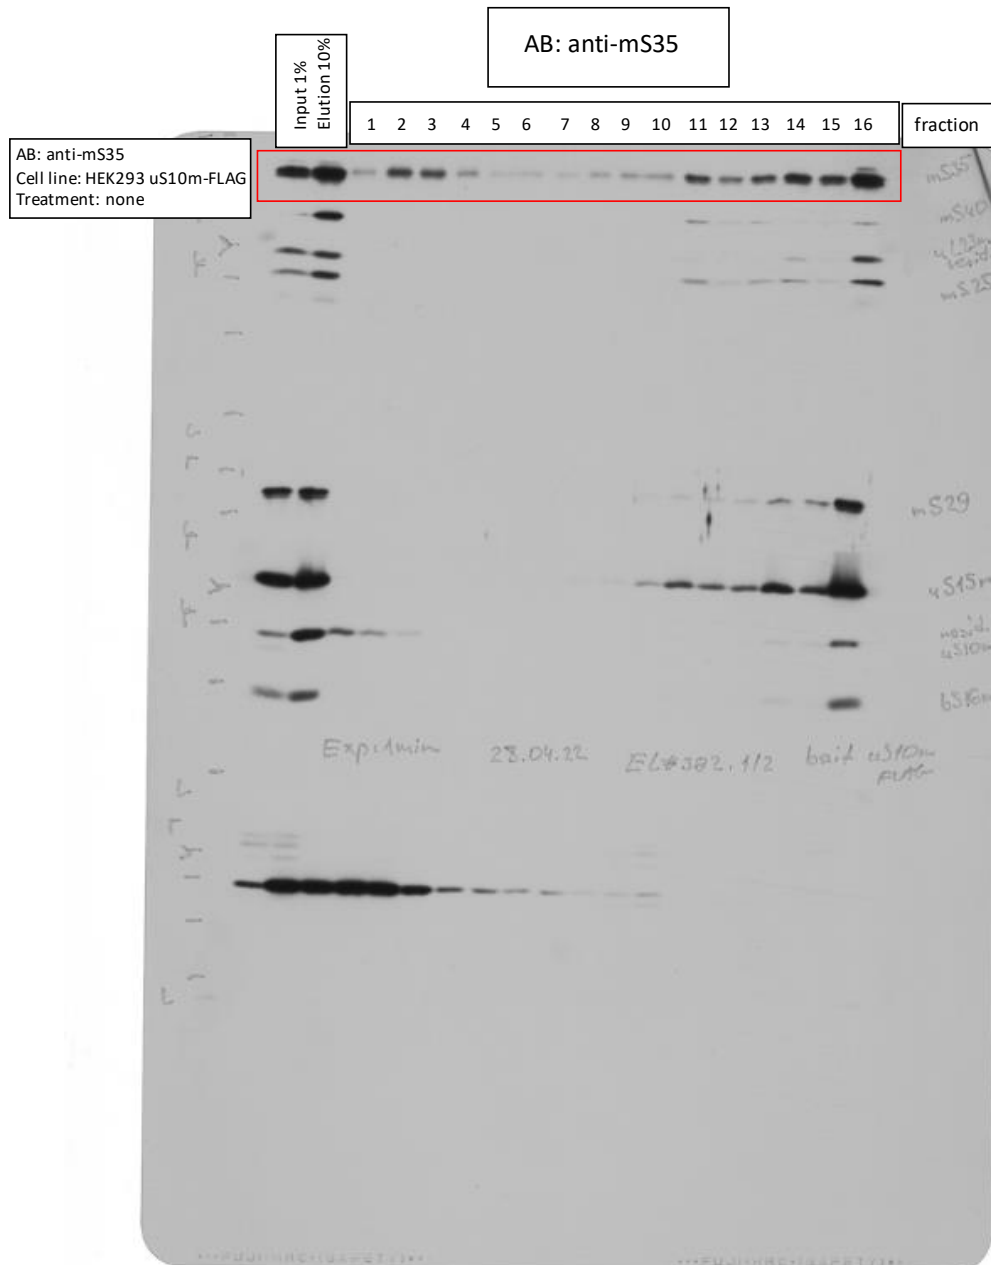

Source Data 2\_related to Extended Data Fig.3f

EL#392.1-2 uS10m-FLAG IP + Gradient

Rotor: SW41 Ti

Gradient: Sucrose 5-30%

Speed: 158.000xg

Time: 15h

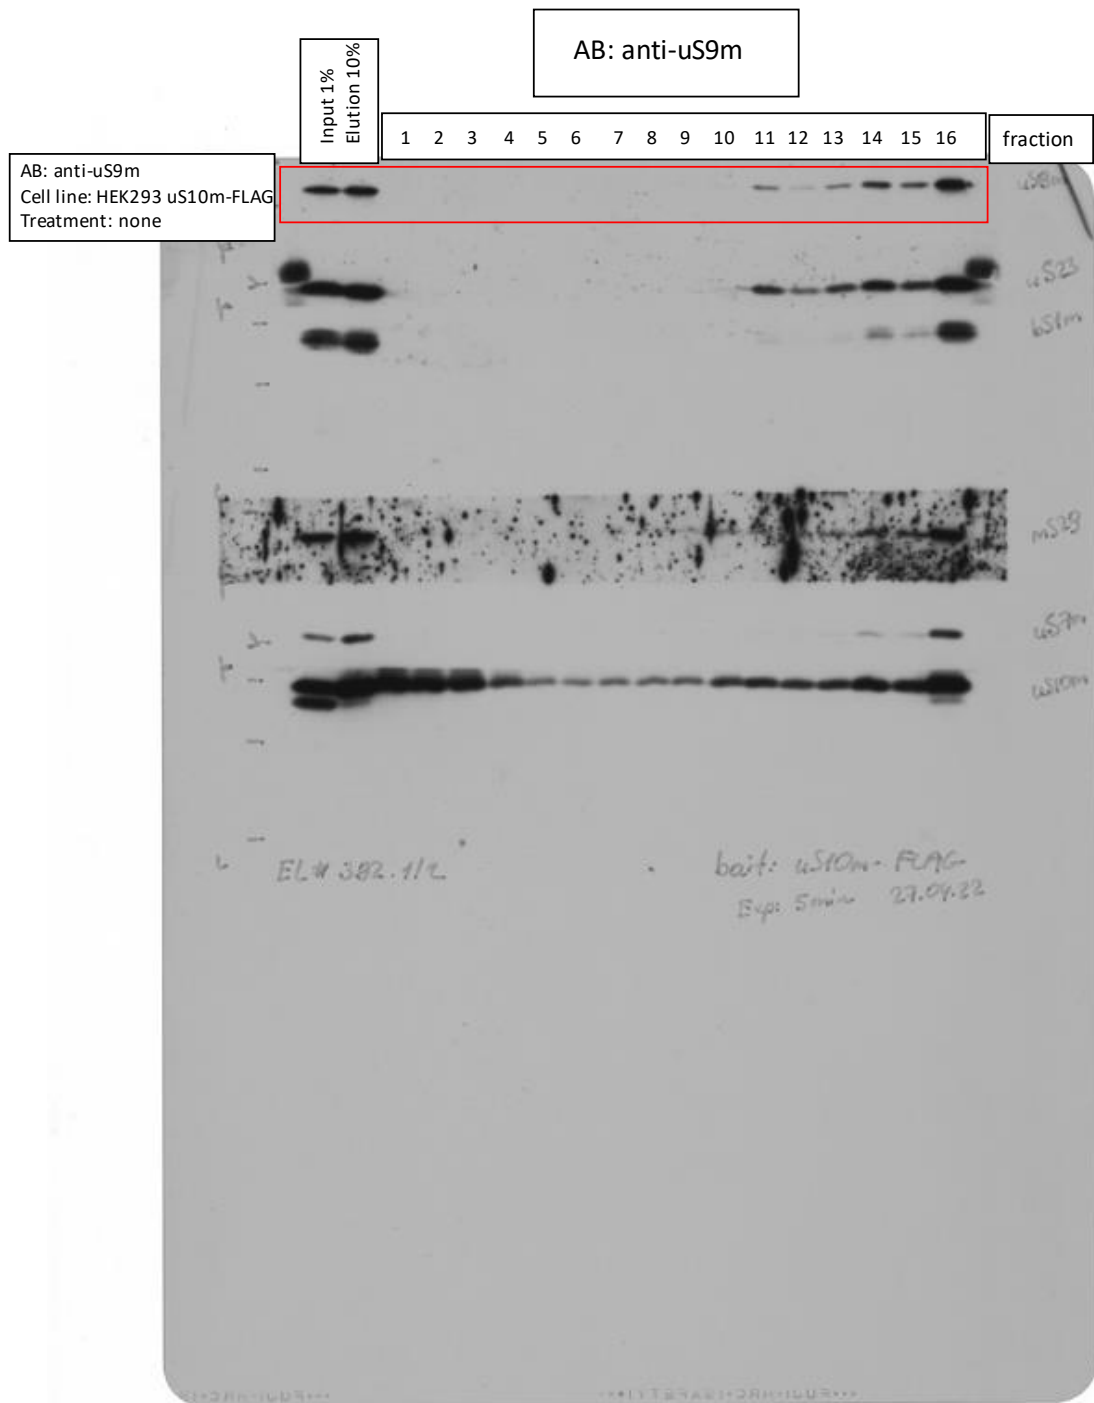

Source Data 2\_related to Extended Data Fig.3f

EL#392.1-2 uS10m-FLAG IP + Gradient

Rotor: SW41 Ti

Gradient: Sucrose 5-30%

Speed: 158.000xg

Time: 15h

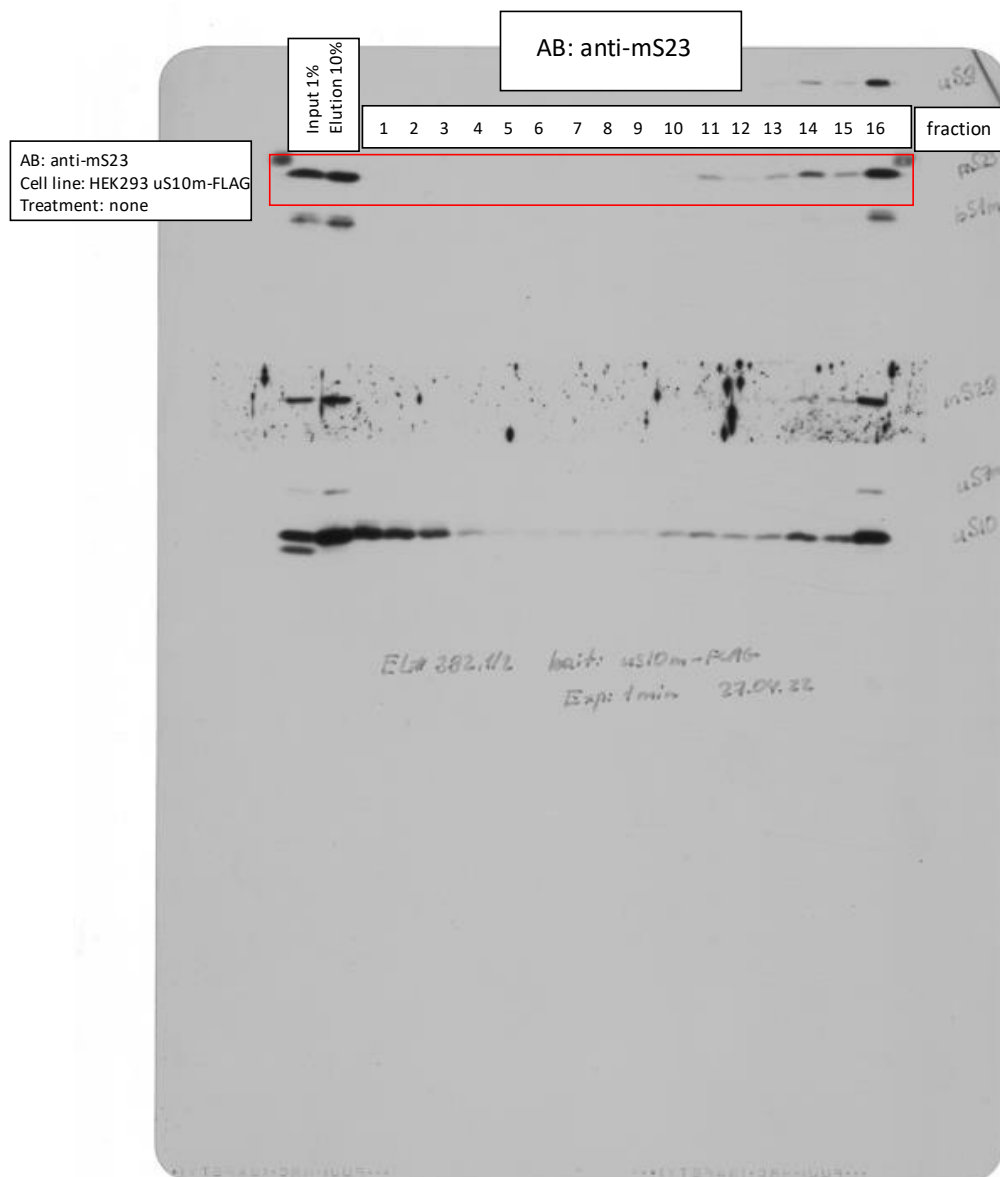

Source Data 2\_related to Extended Data Fig.3f

EL#392.1-2 uS10m-FLAG IP + Gradient

Rotor: SW41 Ti

Gradient: Sucrose 5-30%

Speed: 158.000xg

Time: 15h

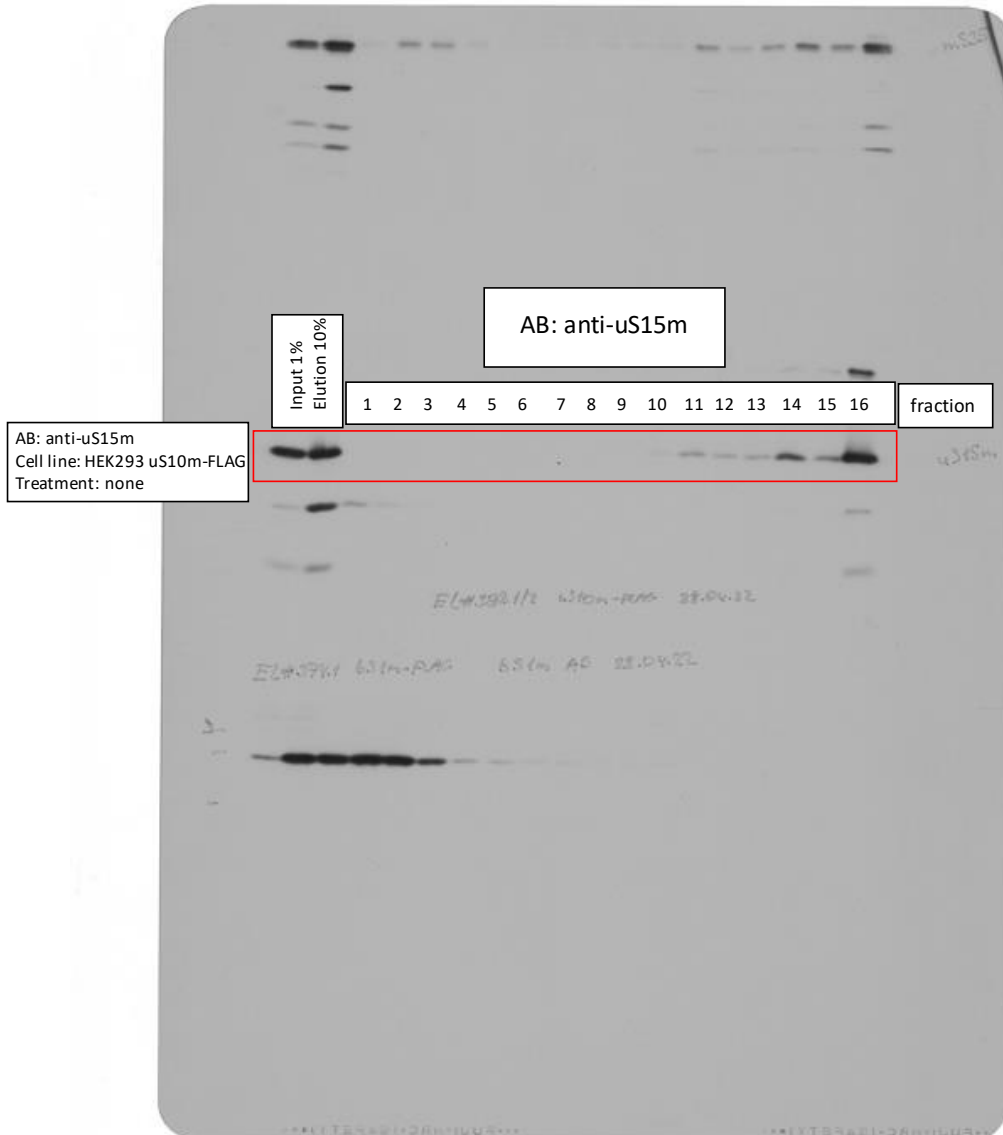

Source Data 2\_related to Extended Data Fig.3f

EL#392.1-2 uS10m-FLAG IP + Gradient

Rotor: SW41 Ti

Gradient: Sucrose 5-30%

Speed: 158.000xg

Time: 15h

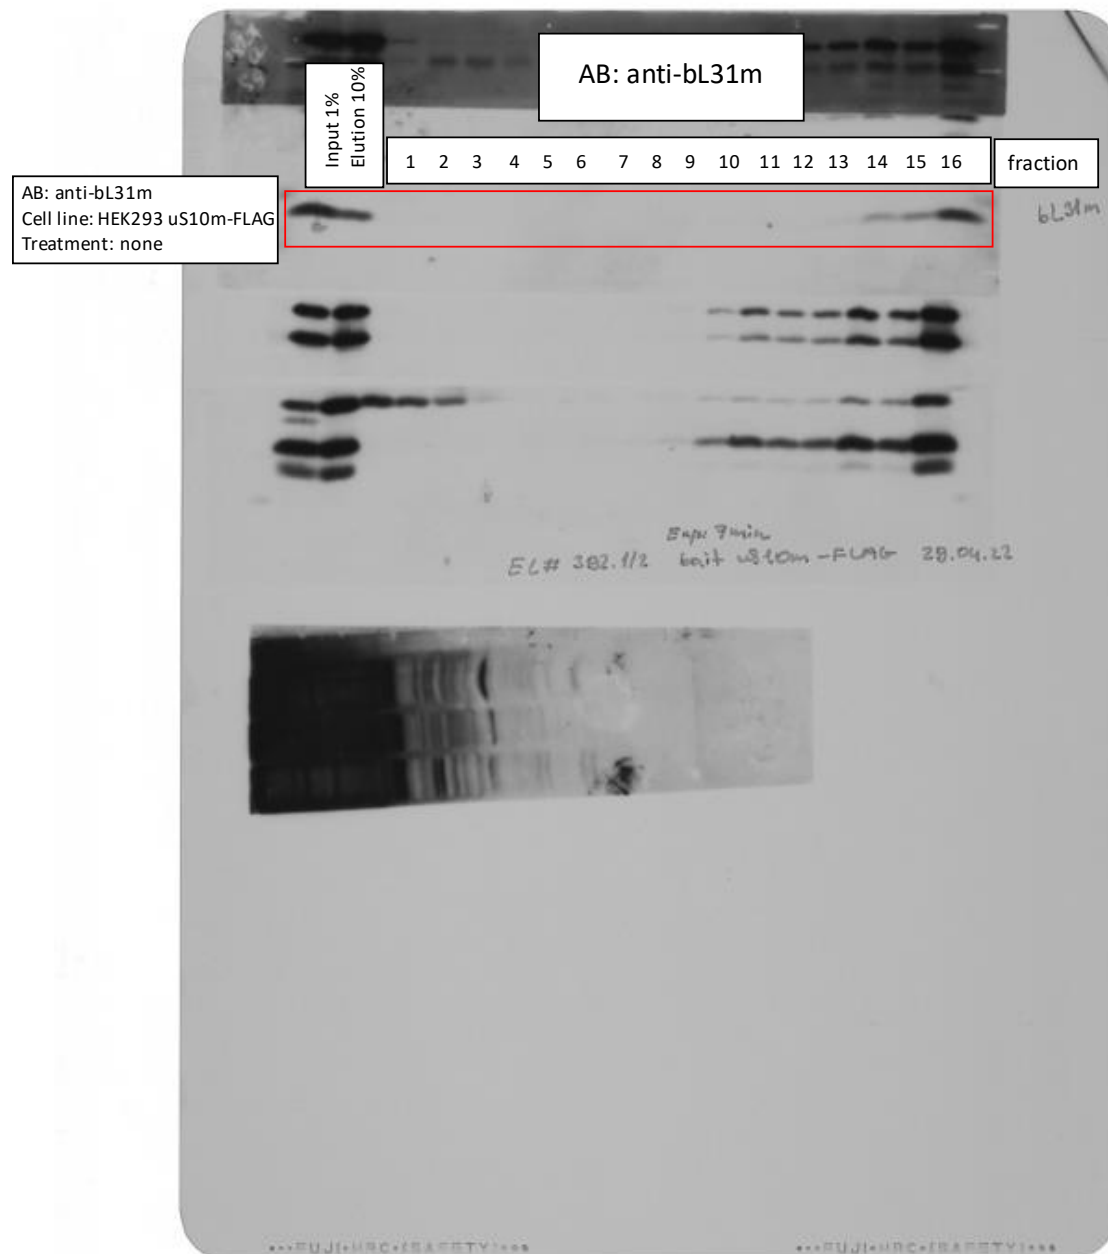

Source Data 2\_related to Extended Data Fig.3f

EL#392.1-2 uS10m-FLAG IP + Gradient

Rotor: SW41 Ti

Gradient: Sucrose 5-30%

Speed: 158.000xg

Time: 15h

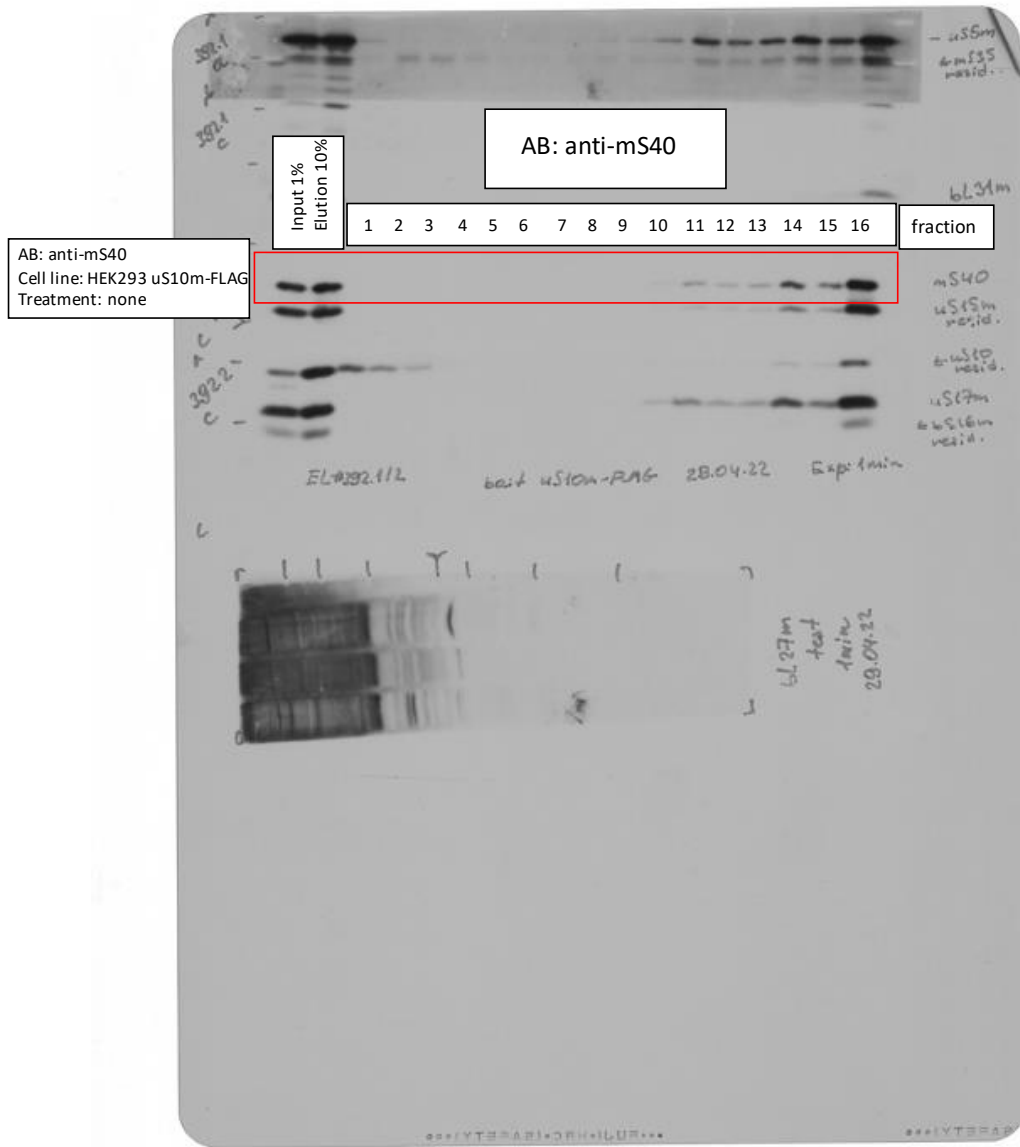

Source Data 2\_related to Extended Data Fig.3f

EL#392.1-2 uS10m-FLAG IP + Gradient

Rotor: SW41 Ti

Gradient: Sucrose 5-30%

Speed: 158.000xg

Time: 15h

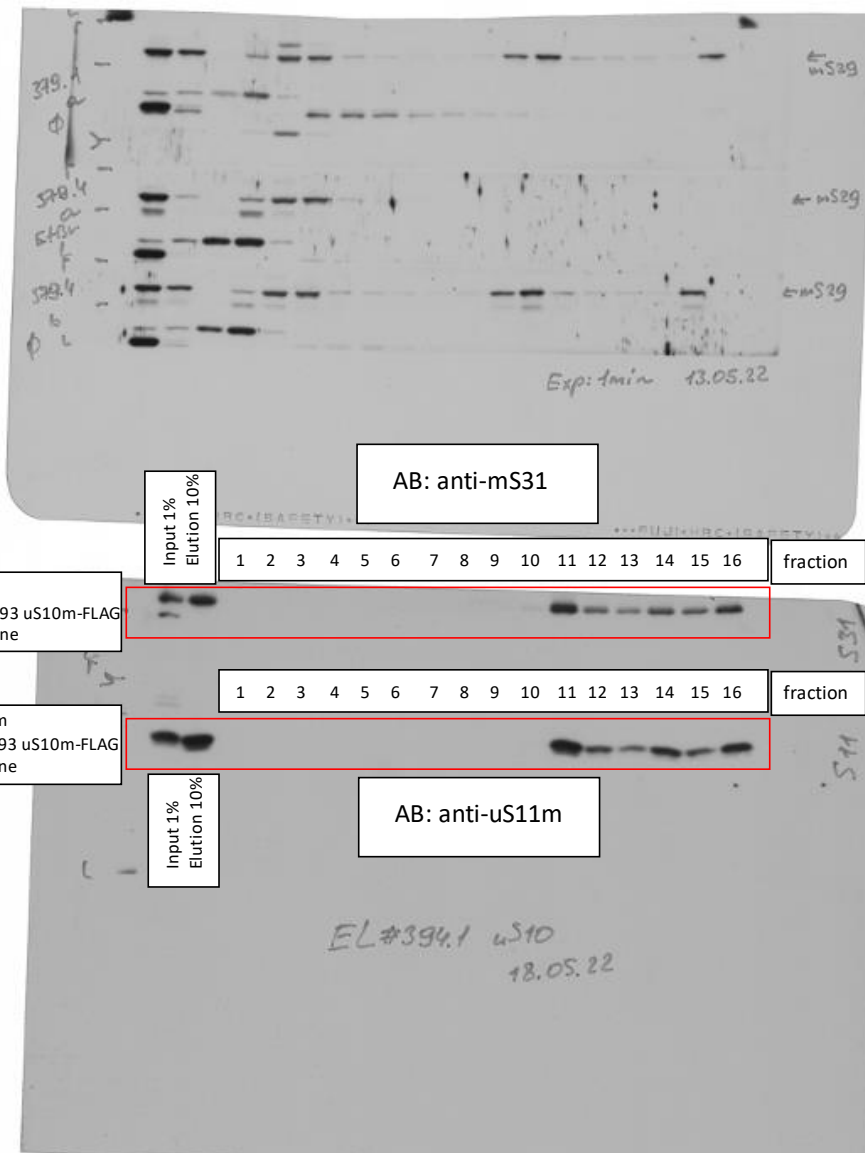

Source Data 2\_related to Extended Data Fig.3f

EL#392.1-2 uS10m-FLAG IP + Gradient

Rotor: SW41 Ti

Gradient: Sucrose 5-30%

Speed: 158.000xg

Time: 15h

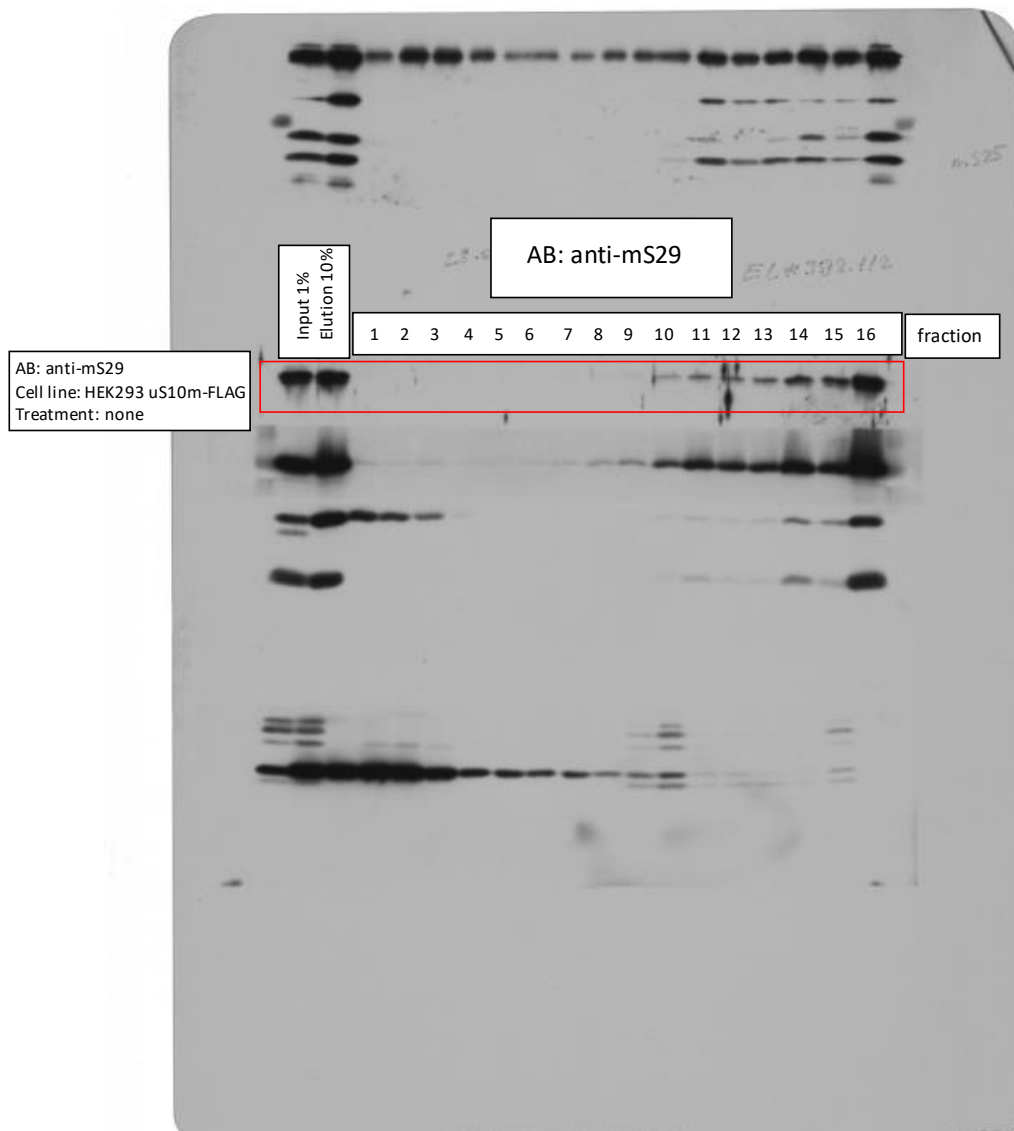



Source Data 2\_related to Extended Data Fig.3f

EL#392.1-2 uS10m-FLAG IP + Gradient

Rotor: SW41 Ti

Gradient: Sucrose 5-30%

Speed: 158.000xg

Time: 15h

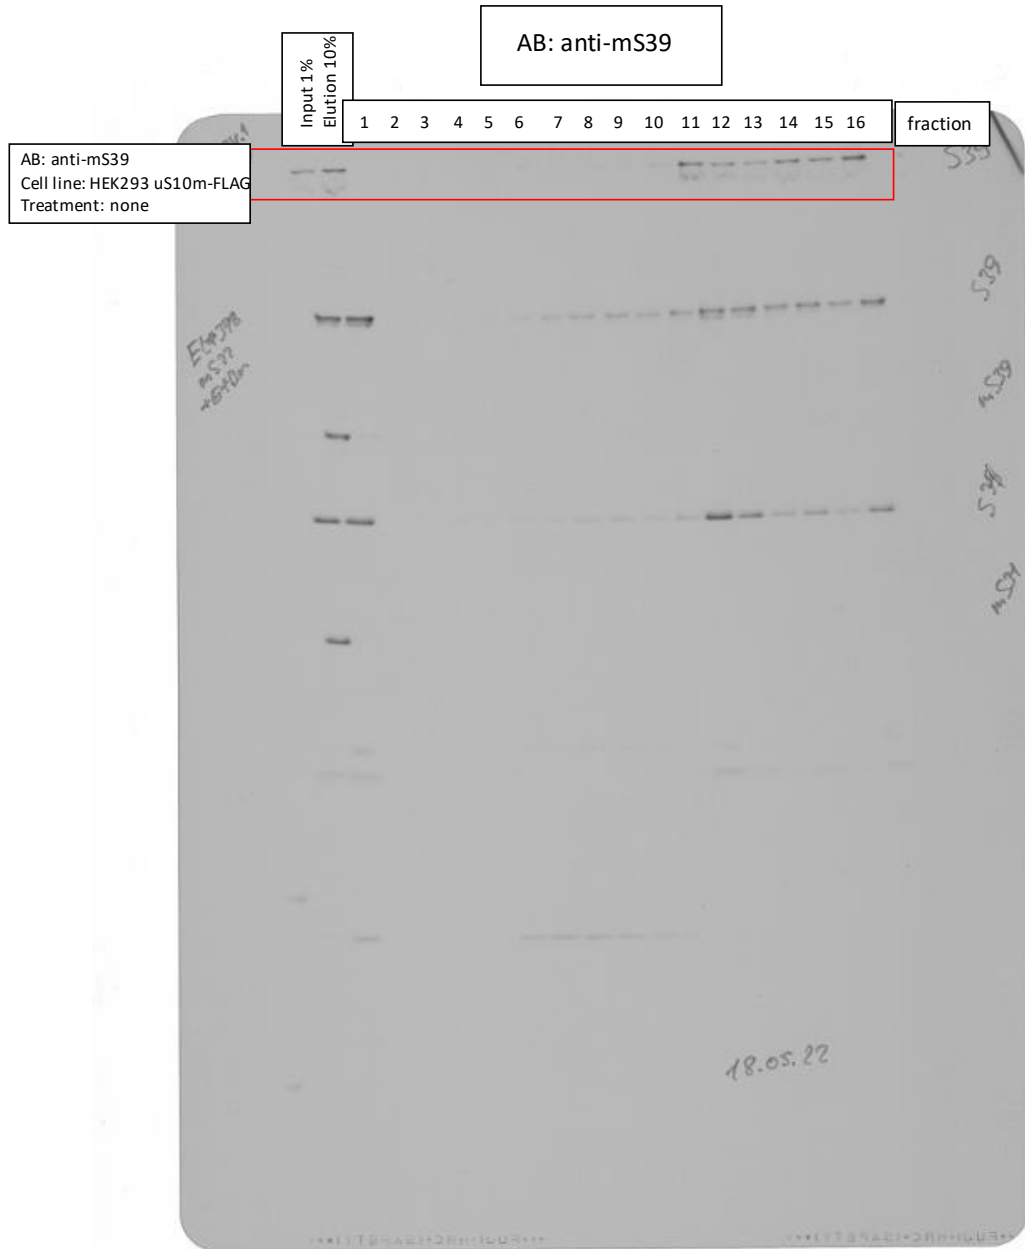

Source Data 2\_related to Extended Data Fig.3g

AS#112 HEK293 WT vs. HEK293 uS7m KO

Rotor: SW41 Ti

Gradient: Sucrose 5-30%

Speed: 158.000xg

Time: 15h

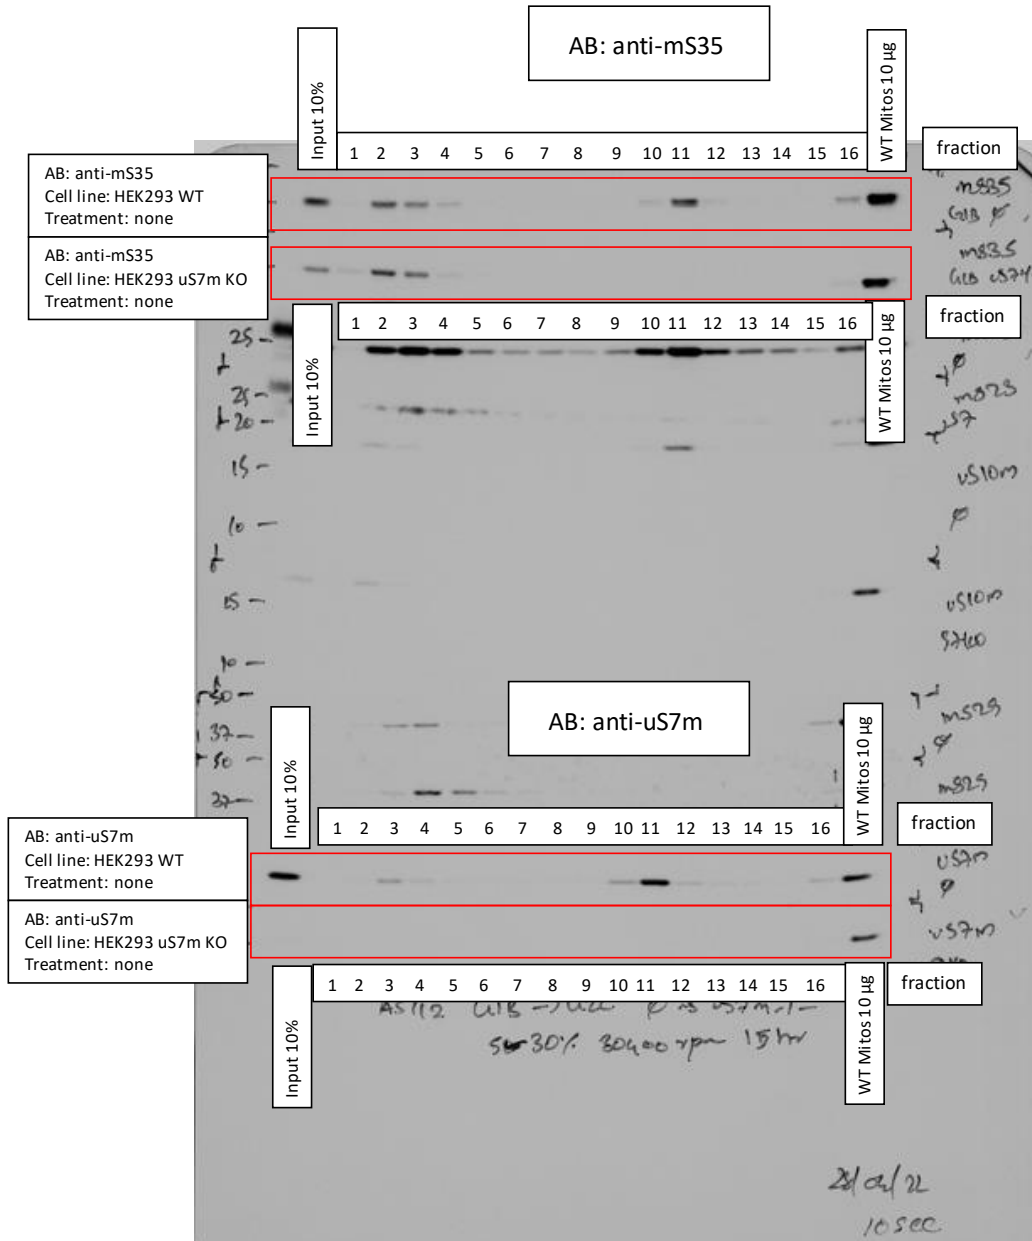

Source Data 2\_related to Extended Data Fig.3g

AS#112 HEK293 WT vs. HEK293 uS7m KO

Rotor: SW41 Ti

Gradient: Sucrose 5-30%

Speed: 158.000xg

Time: 15h

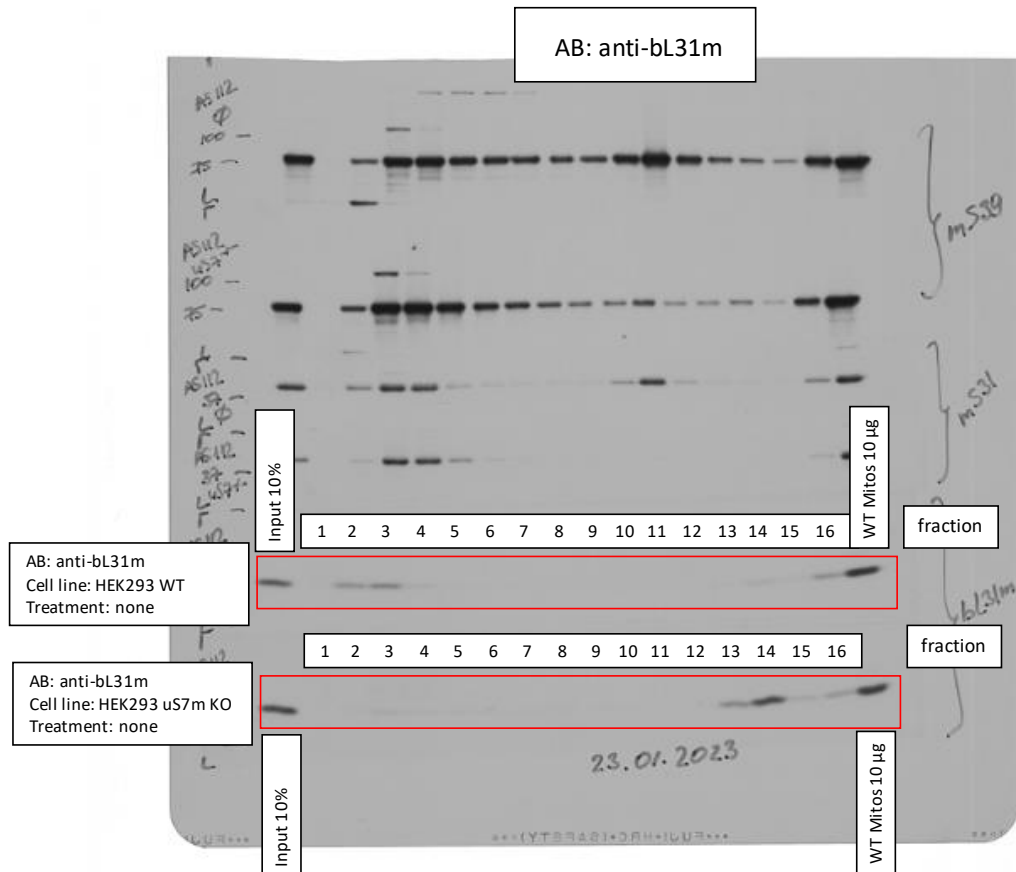

Source Data 2\_related to Extended Data Fig.3g

AS#112 HEK293 WT vs. HEK293 uS7m KO

Rotor: SW41 Ti

Gradient: Sucrose 5-30%

Speed: 158.000xg

Time: 15h

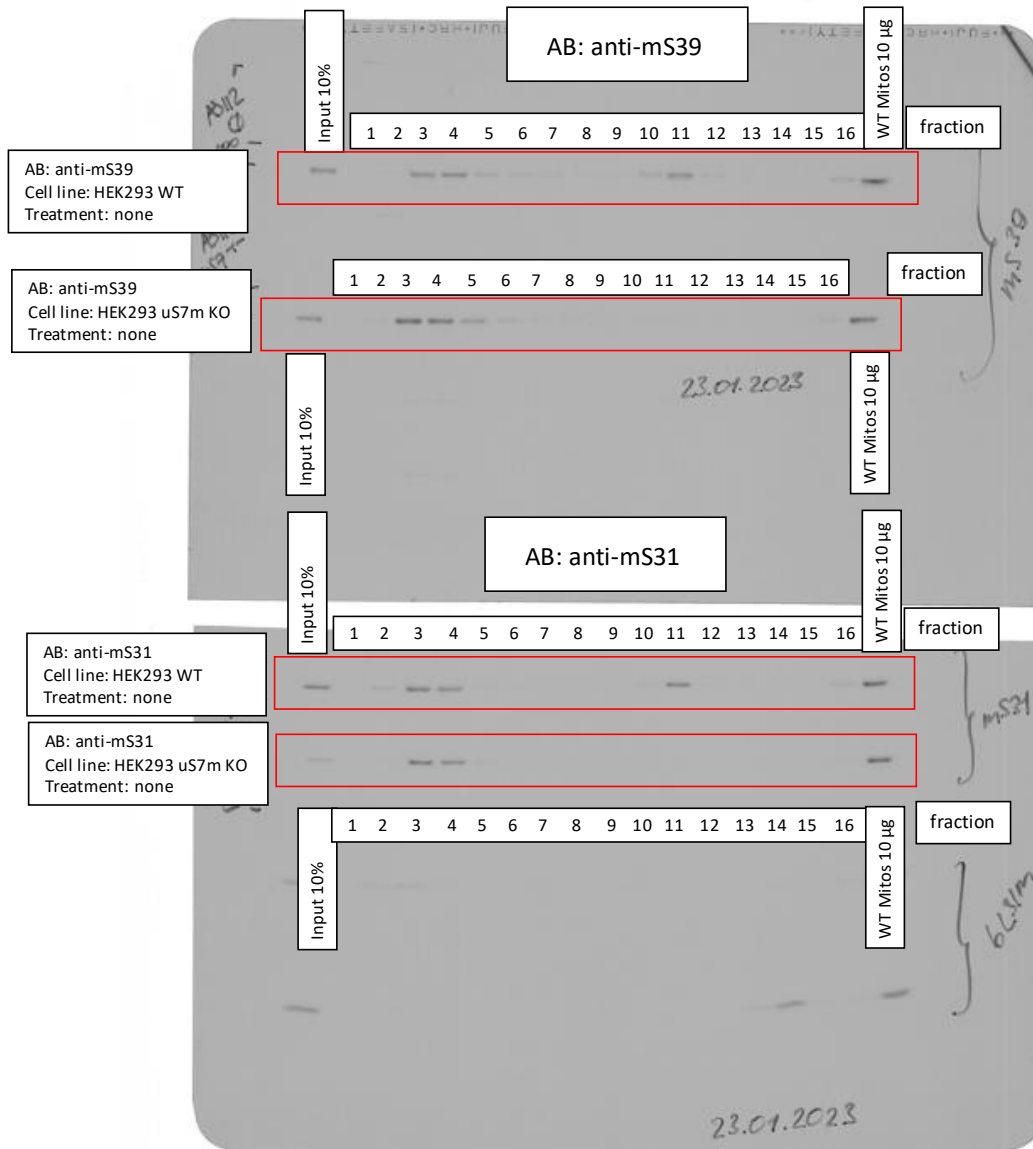

Source Data 2\_related to Extended Data Fig.3g

AS#112 HEK293 WT vs. HEK293 uS7m KO

Rotor: SW41 Ti

Gradient: Sucrose 5-30%

Speed: 158.000xg

Time: 15h

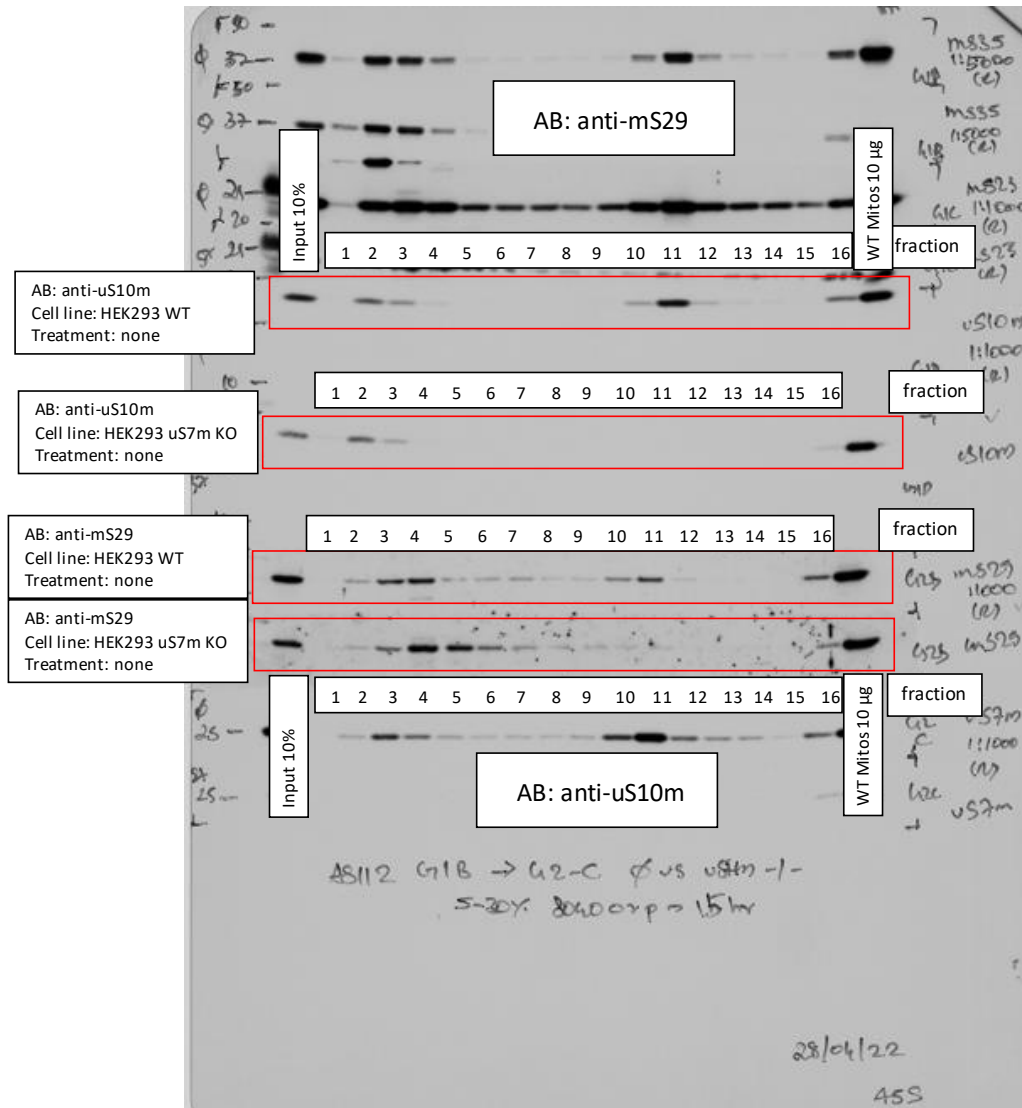

Source Data 2\_related to Extended Data Fig.3g

AS#112 HEK293 WT vs. HEK293 uS7m KO

Rotor: SW41 Ti

Gradient: Sucrose 5-30%

Speed: 158.000xg

Time: 15h

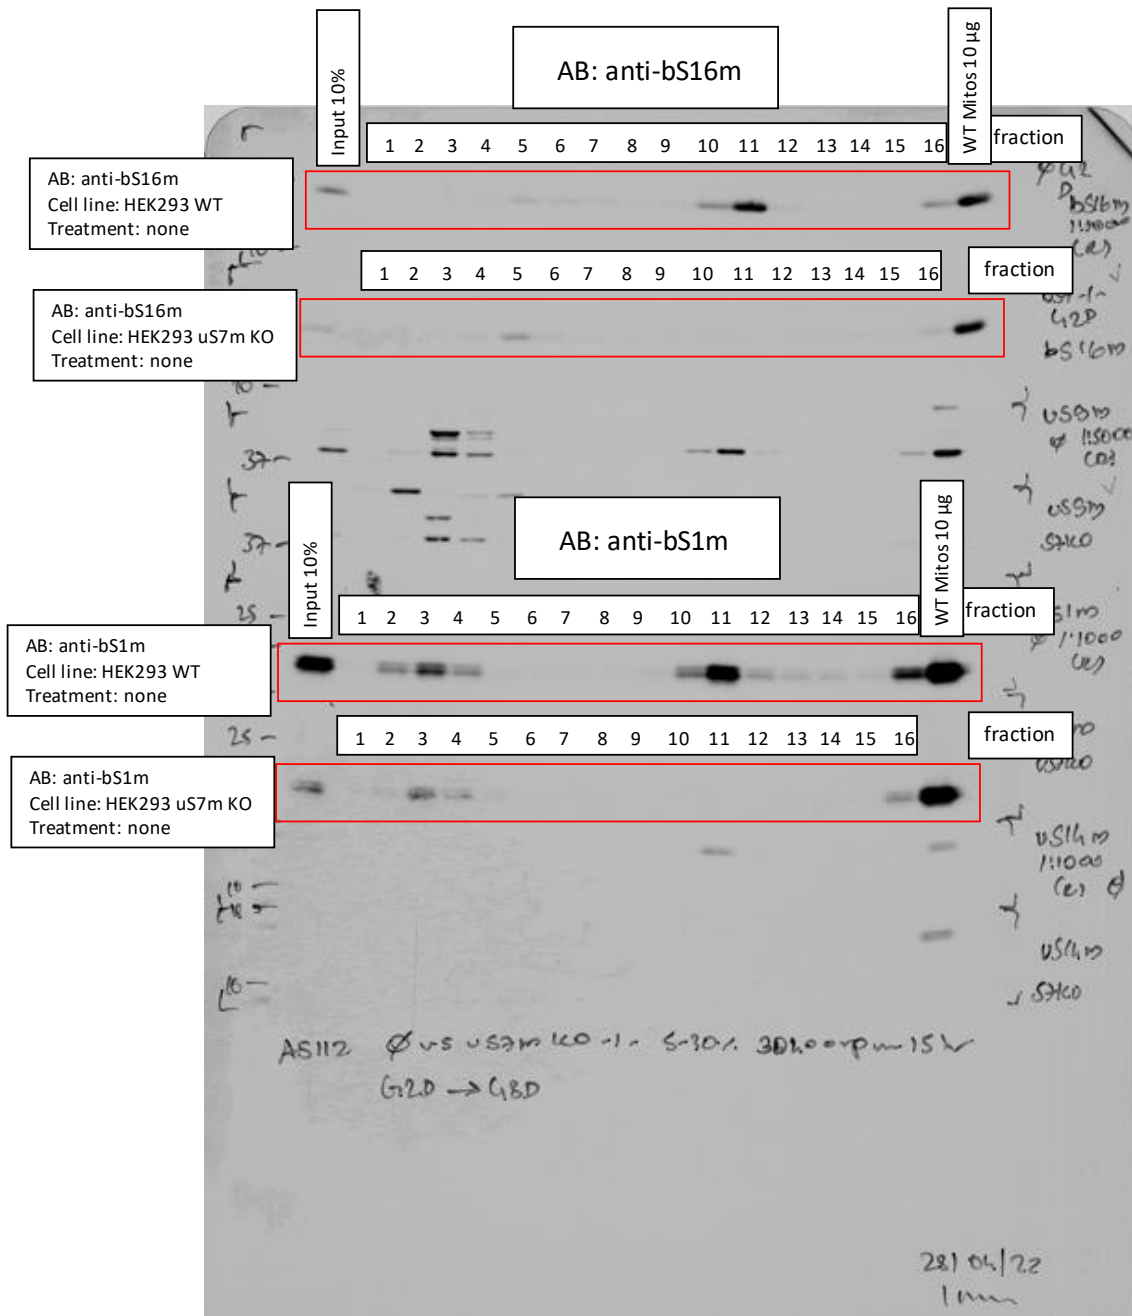

Source Data 2\_related to Extended Data Fig.3g

AS#112 HEK293 WT vs. HEK293 uS7m KO

Rotor: SW41 Ti

Gradient: Sucrose 5-30%

Speed: 158.000xg

Time: 15h

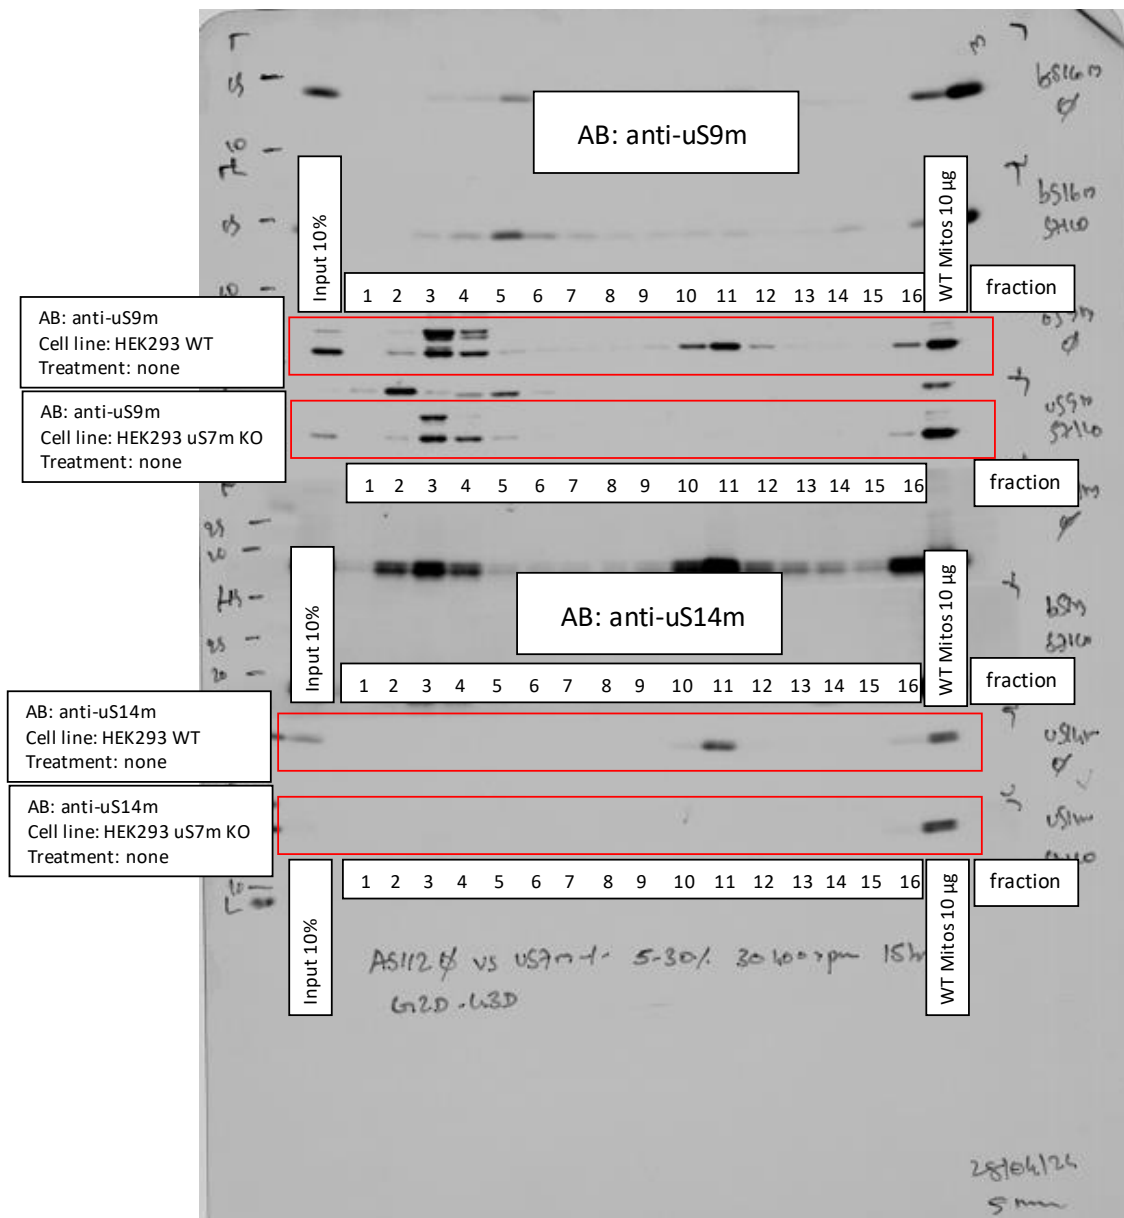

Supplement: 41594_2024_1356_MOESM20_ESM.pdf [file 41594_2024_1356_MOESM20_ESM.pdf]
