# Supplementary material for: A roadmap for ribosome assembly in human mitochondria
Source: PubMed Central journal article supplement (PMC11638073; doi:10.1038/s41594-024-01356-w), 2024-07-11

Source Data 3\_related to Extended Data Fig.7a  
 EL#380 mL62-FLAG IP + Gradient + EtBr treatment  
 Rotor: SW41 Ti  
 Gradient: Sucrose 5-30%  
 Speed: 158.000xg  
 Time: 15h

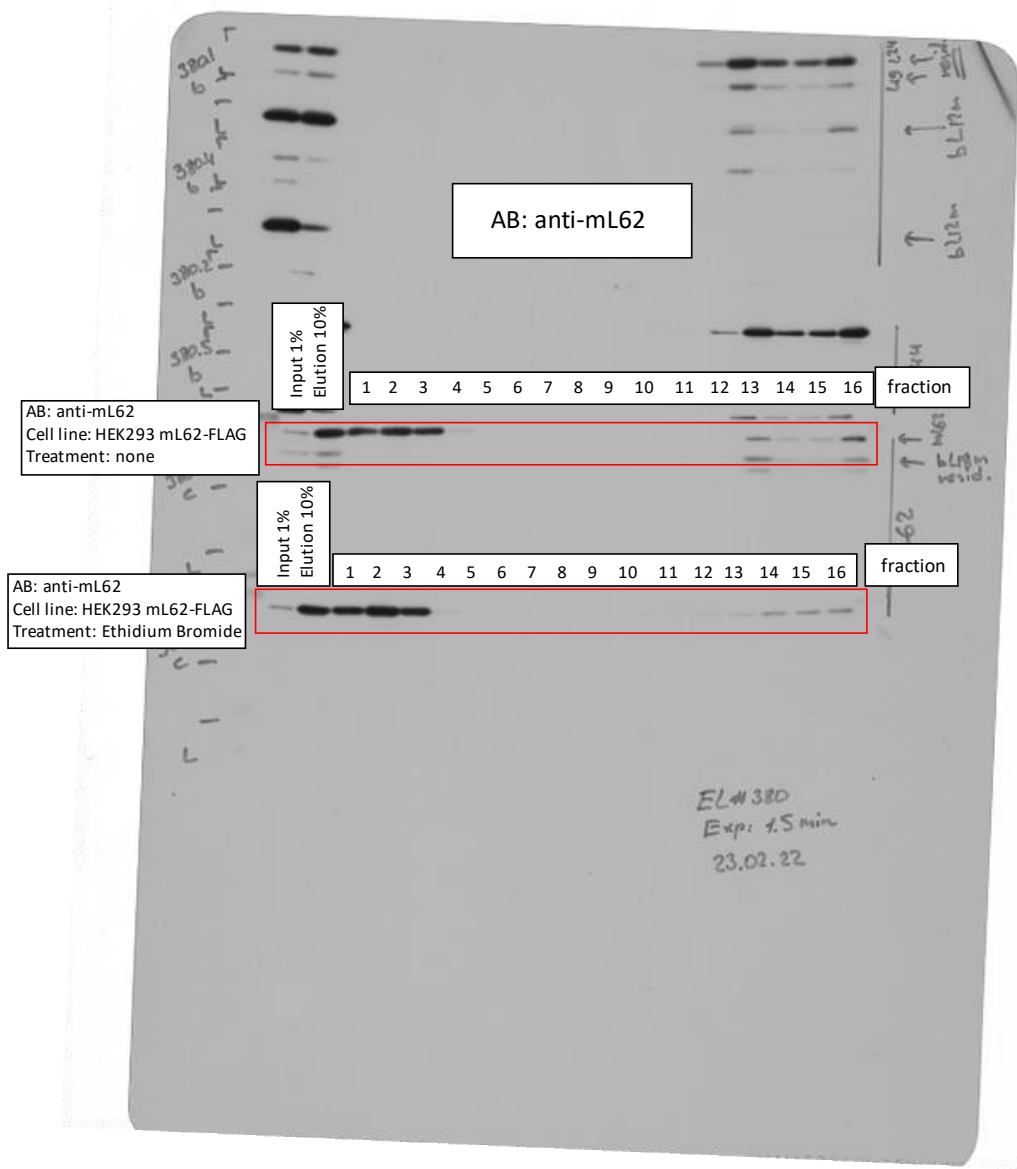

Source Data 3\_related to Extended Data Fig.7a  
 EL#380 mL62-FLAG IP + Gradient + EtBr treatment  
 Rotor: SW41 Ti  
 Gradient: Sucrose 5-30%  
 Speed: 158.000xg  
 Time: 15h

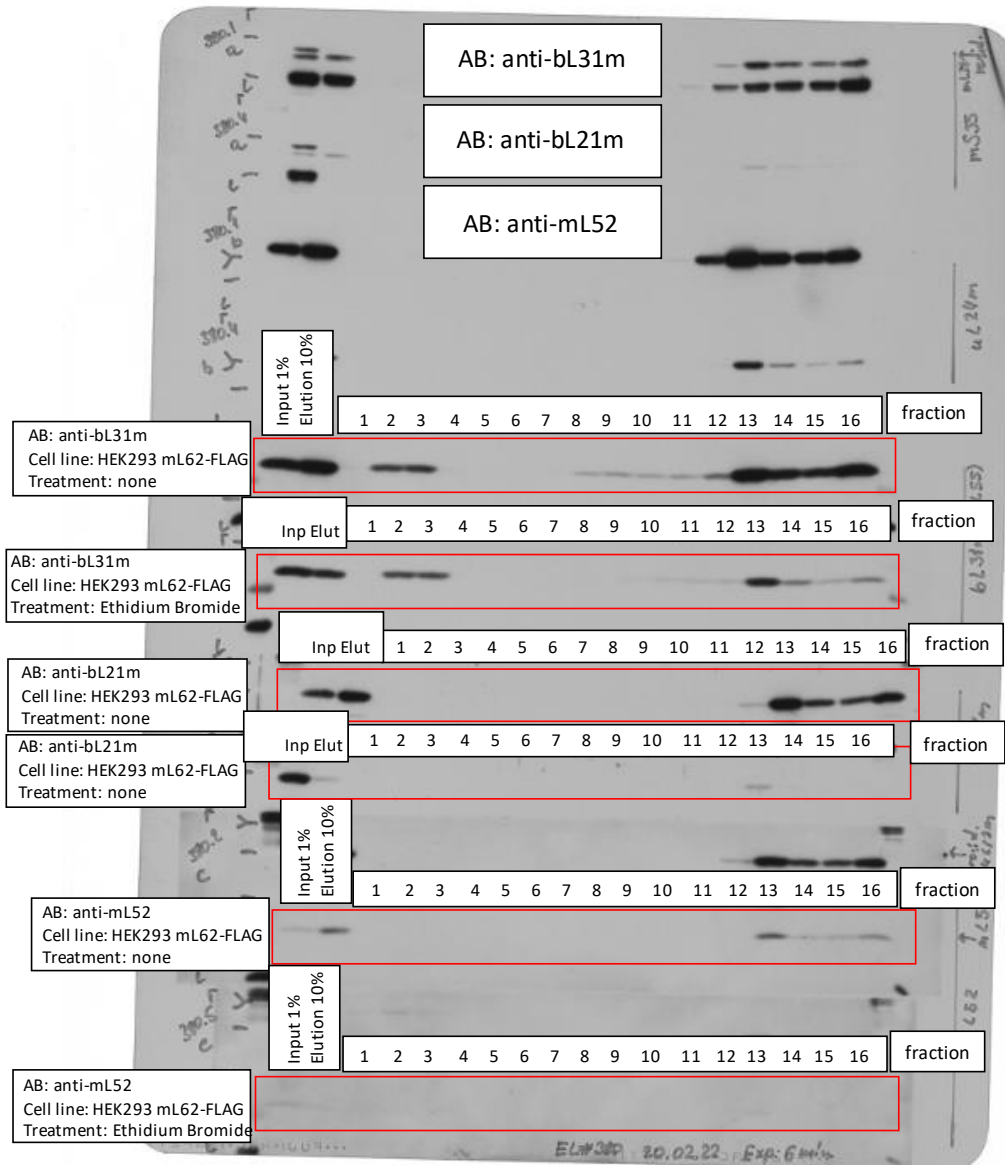

Source Data 3\_related to Extended Data Fig.7a  
EL#380 mL62-FLAG IP + Gradient + EtBr treatment  
Rotor: SW41 Ti  
Gradient: Sucrose 5-30%  
Speed: 158.000xg  
Time: 15h

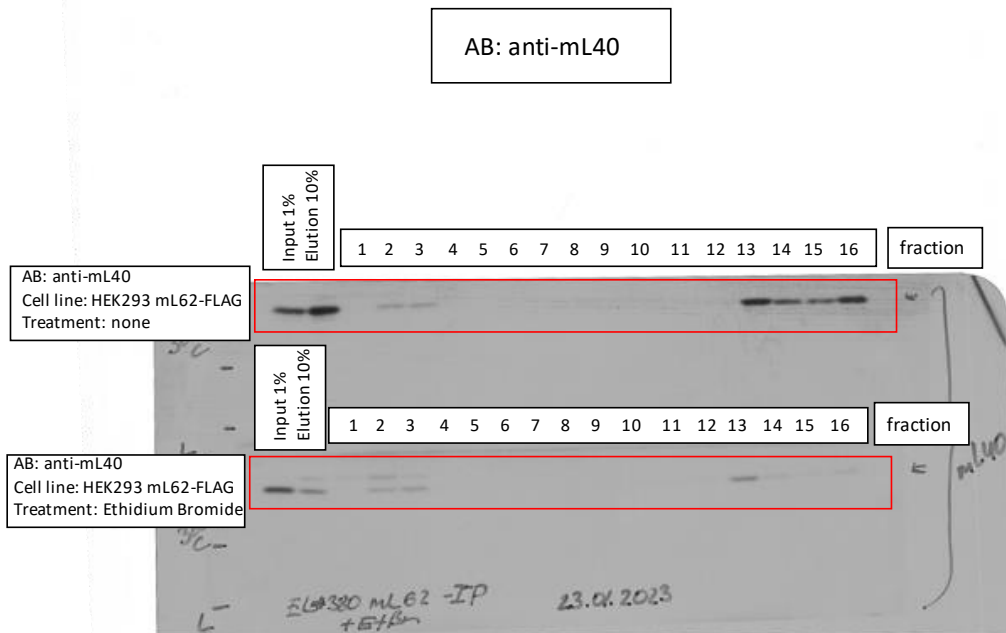

Source Data 3\_related to Extended Data Fig.7a  
EL#380 mL62-FLAG IP + Gradient + EtBr treatment  
Rotor: SW41 Ti  
Gradient: Sucrose 5-30%  
Speed: 158.000xg  
Time: 15h

AB: anti-mL46

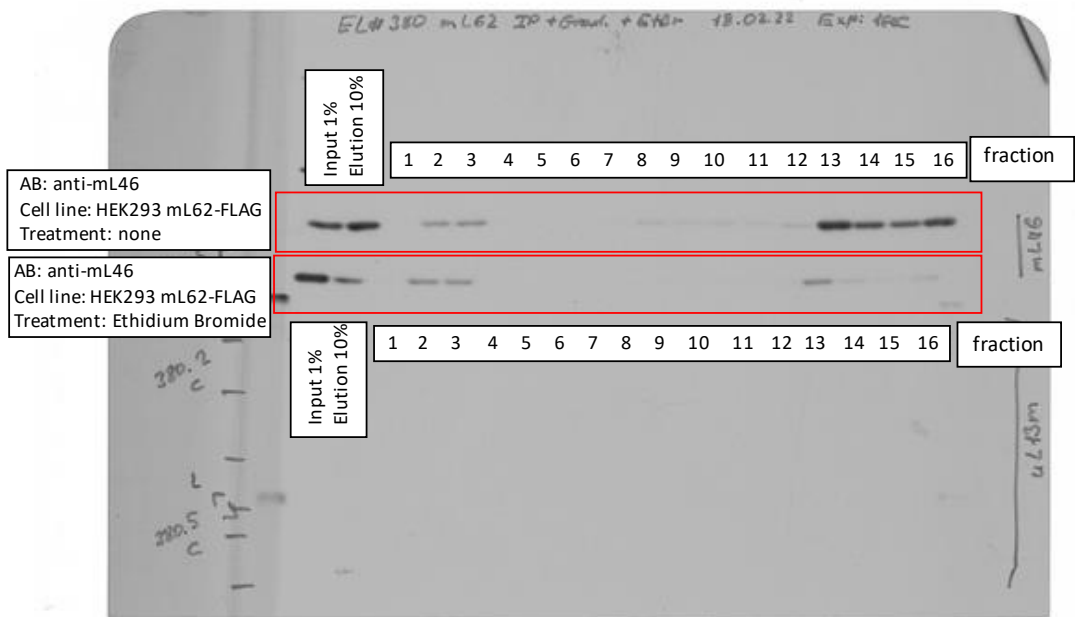

Source Data 3\_related to Extended Data Fig.7a  
 EL#380 mL62-FLAG IP + Gradient + EtBr treatment  
 Rotor: SW41 Ti  
 Gradient: Sucrose 5-30%  
 Speed: 158.000xg  
 Time: 15h

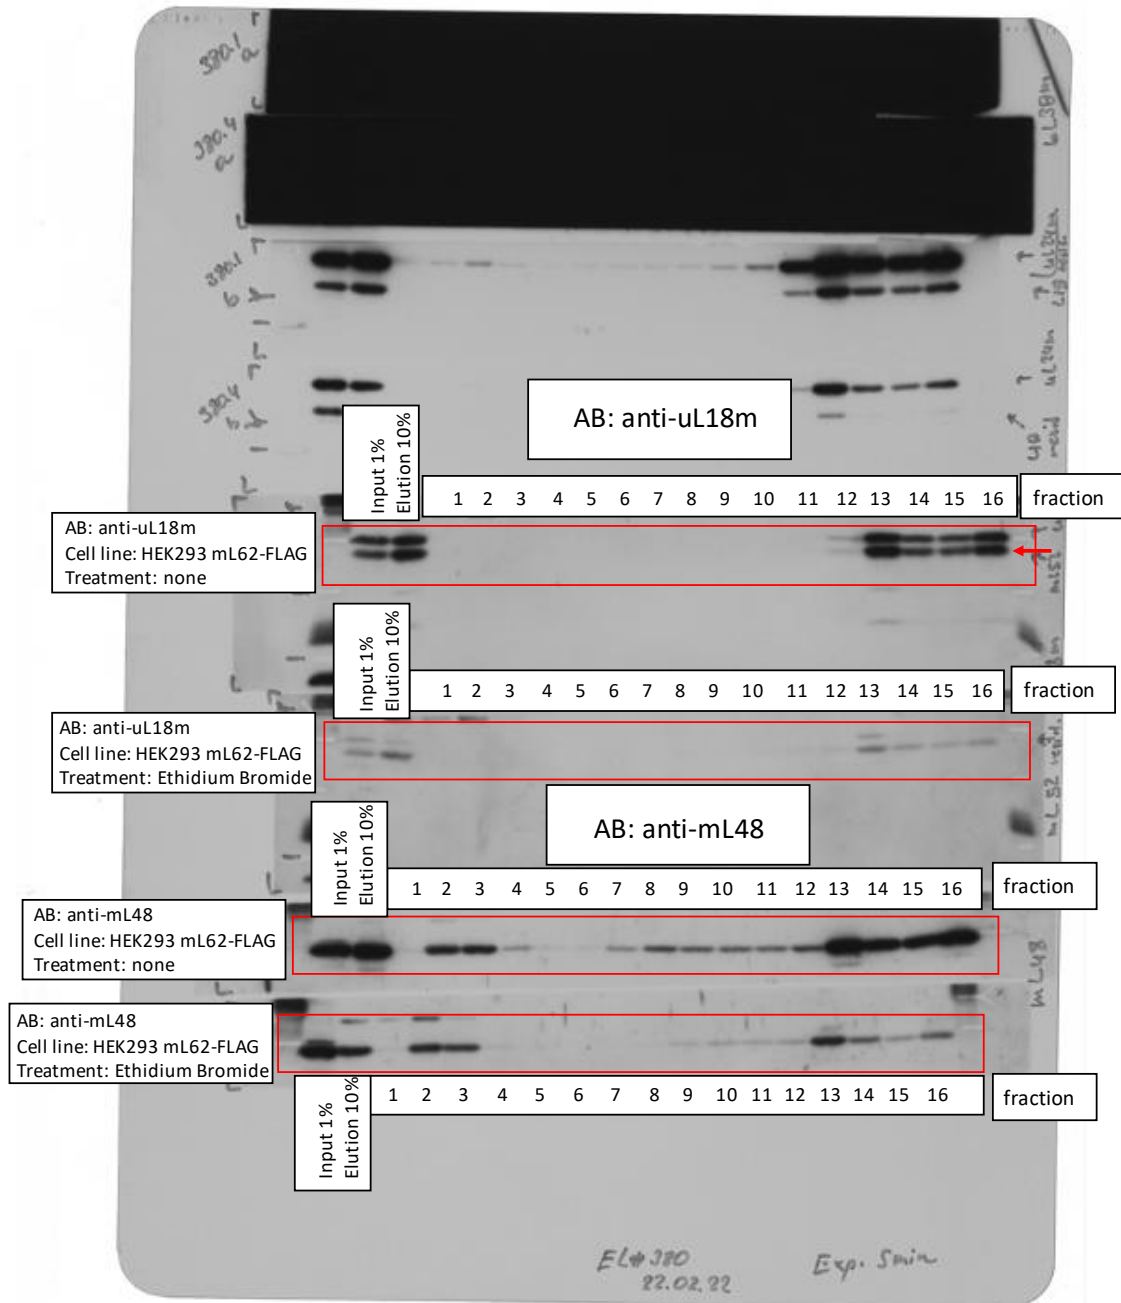

Source Data 3\_related to Extended Data Fig.7a  
 EL#380 mL62-FLAG IP + Gradient + EtBr treatment  
 Rotor: SW41 Ti  
 Gradient: Sucrose 5-30%  
 Speed: 158.000xg  
 Time: 15h

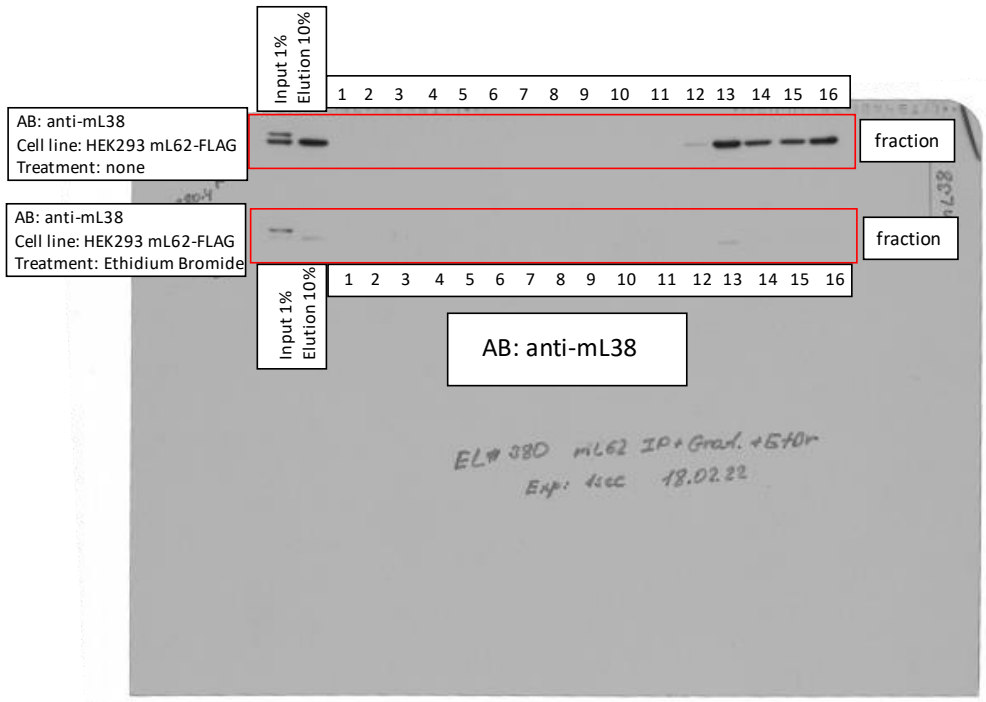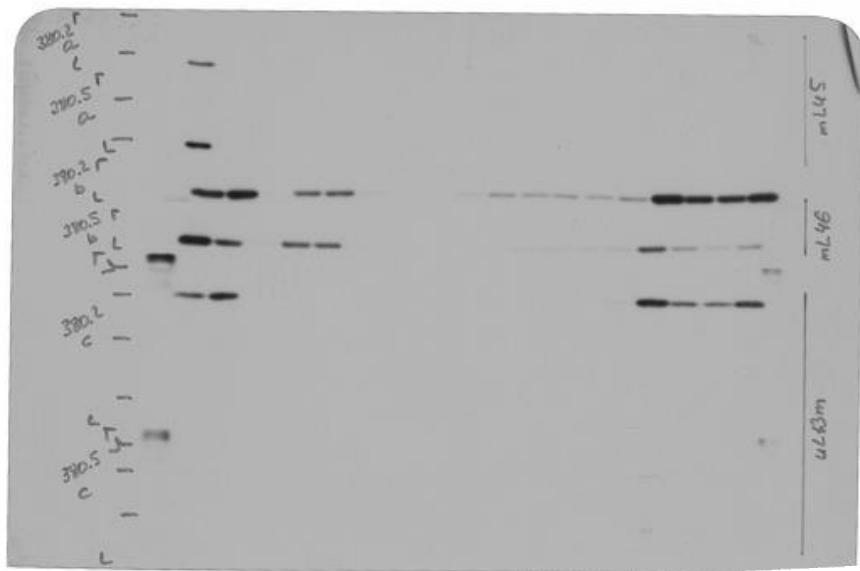

Source Data 3\_related to Extended Data Fig.7a  
 EL#380 mL62-FLAG IP + Gradient + EtBr treatment  
 Rotor: SW41 Ti  
 Gradient: Sucrose 5-30%  
 Speed: 158.000xg  
 Time: 15h

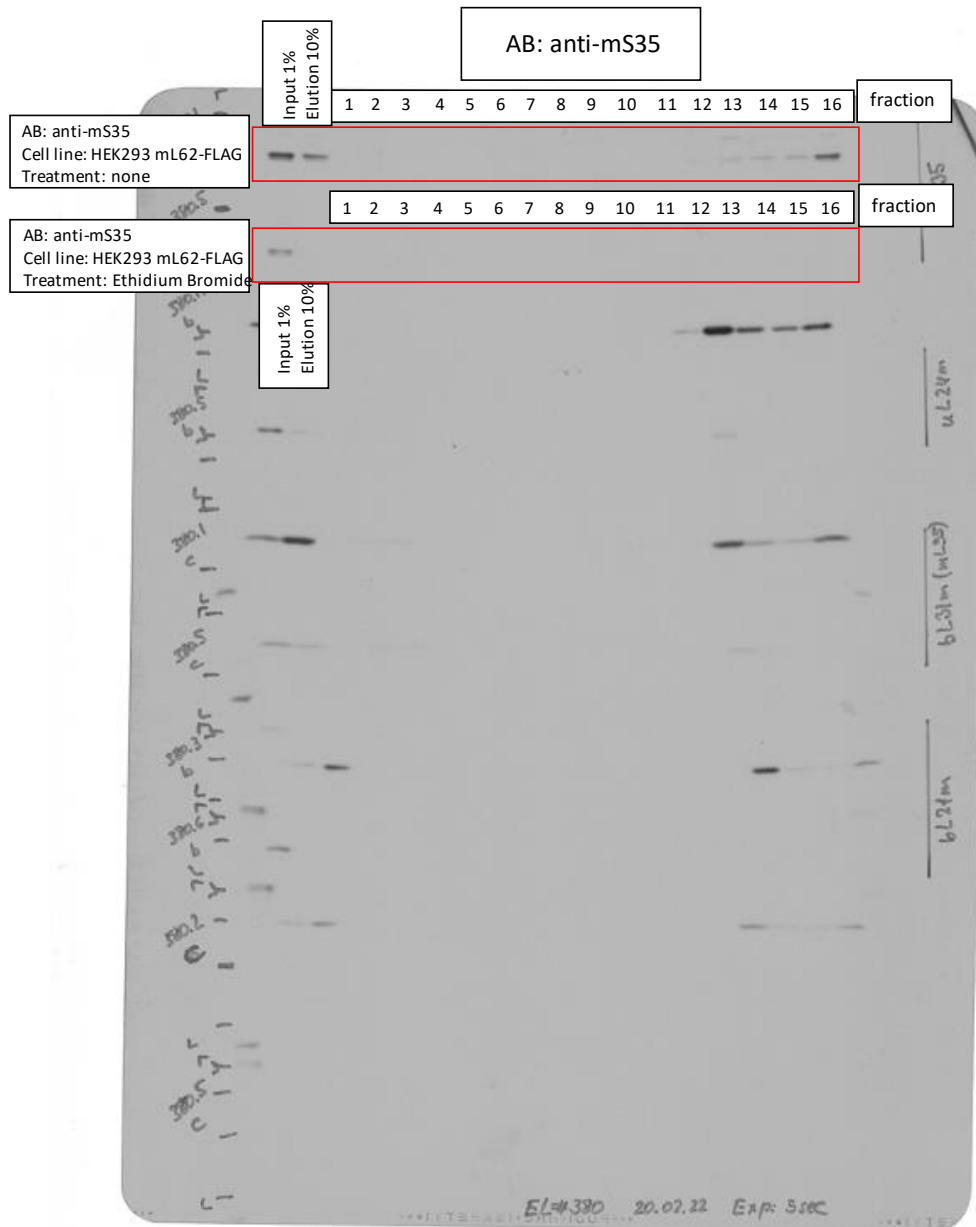

Source Data 3\_related to Extended Data Fig.7b

EL#399.4-6 bL31m-FLAG IP + Gradient

Rotor: SW41 Ti

Gradient: Sucrose 5-30%

Speed: 158.000xg

Time: 15h

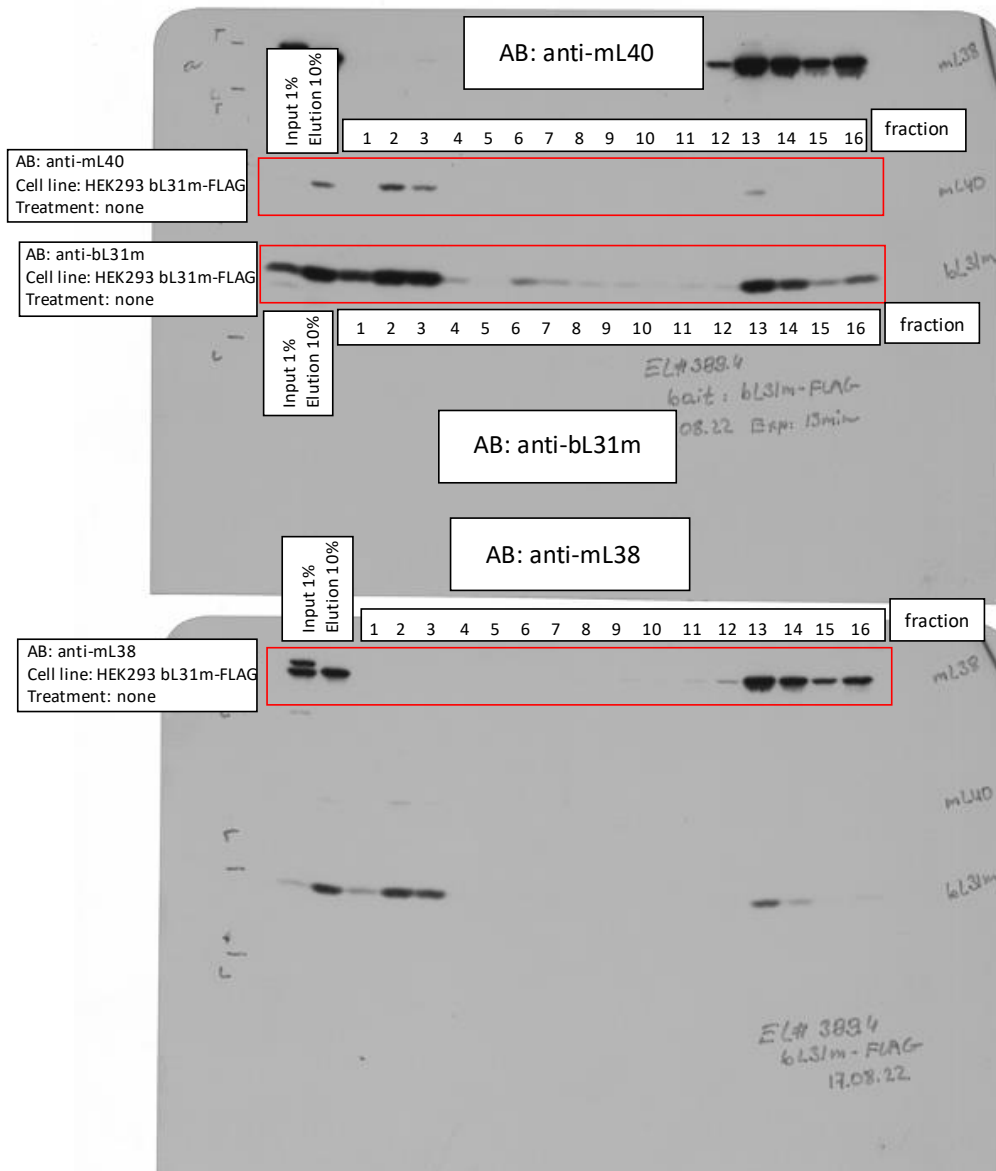



Source Data 3\_related to Extended Data Fig.7b

EL#399.4-6 bL31m-FLAG IP + Gradient

Rotor: SW41 Ti

Gradient: Sucrose 5-30%

Speed: 158.000xg

Time: 15h

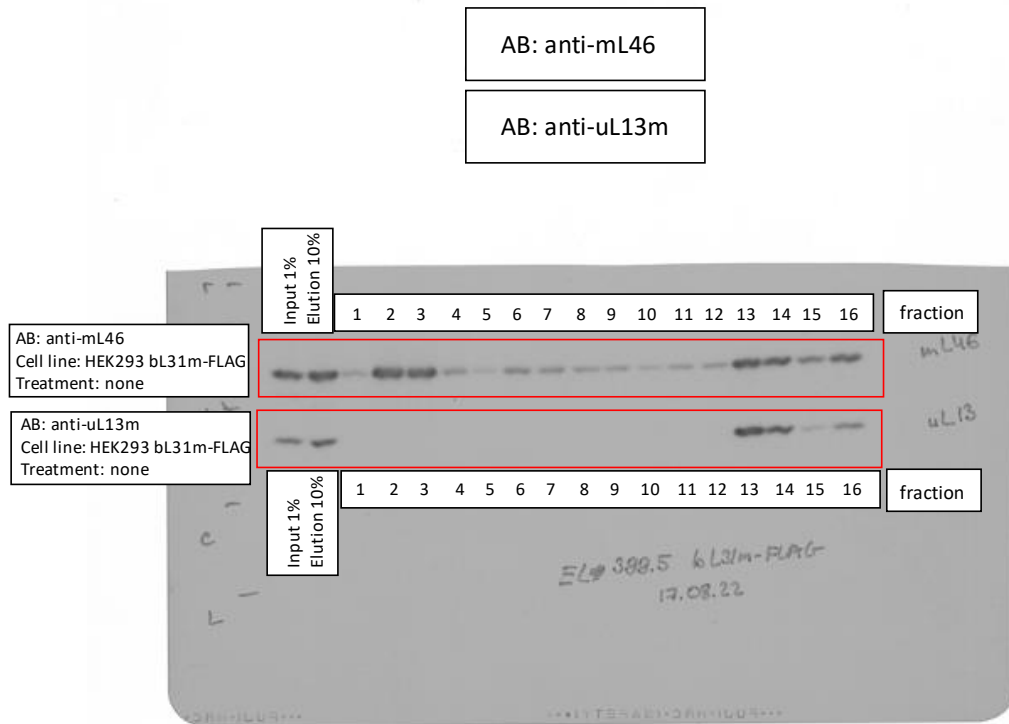

Source Data 3\_related to Extended Data Fig.7b

EL#399.4-6 bL31m-FLAG IP + Gradient

Rotor: SW41 Ti

Gradient: Sucrose 5-30%

Speed: 158.000xg

Time: 15h

AB: anti-mL52

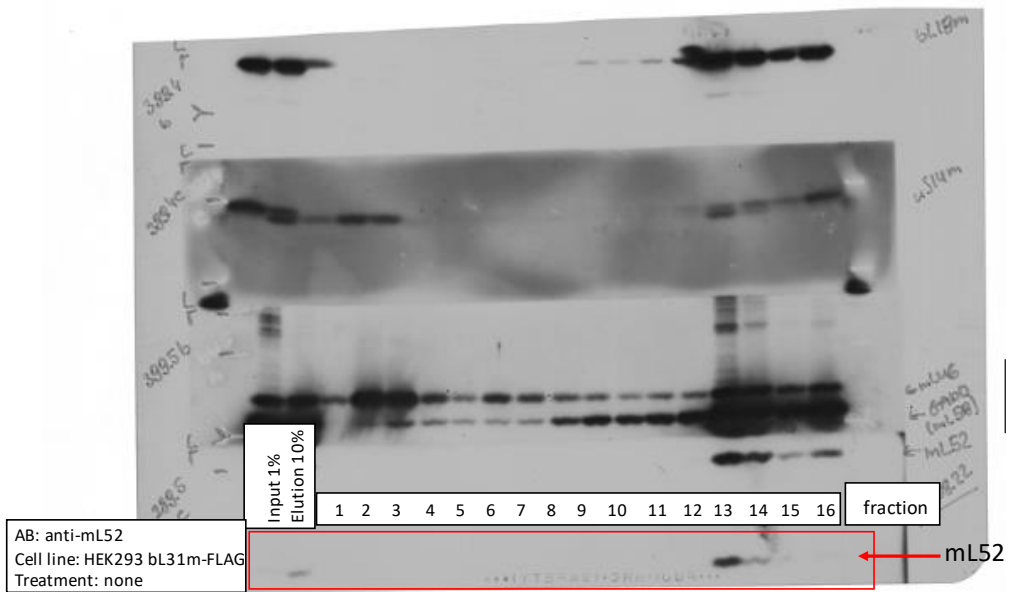

Source Data 3\_related to Extended Data Fig.7b

EL#399.4-6 bL31m-FLAG IP + Gradient

Rotor: SW41 Ti

Gradient: Sucrose 5-30%

Speed: 158.000xg

Time: 15h

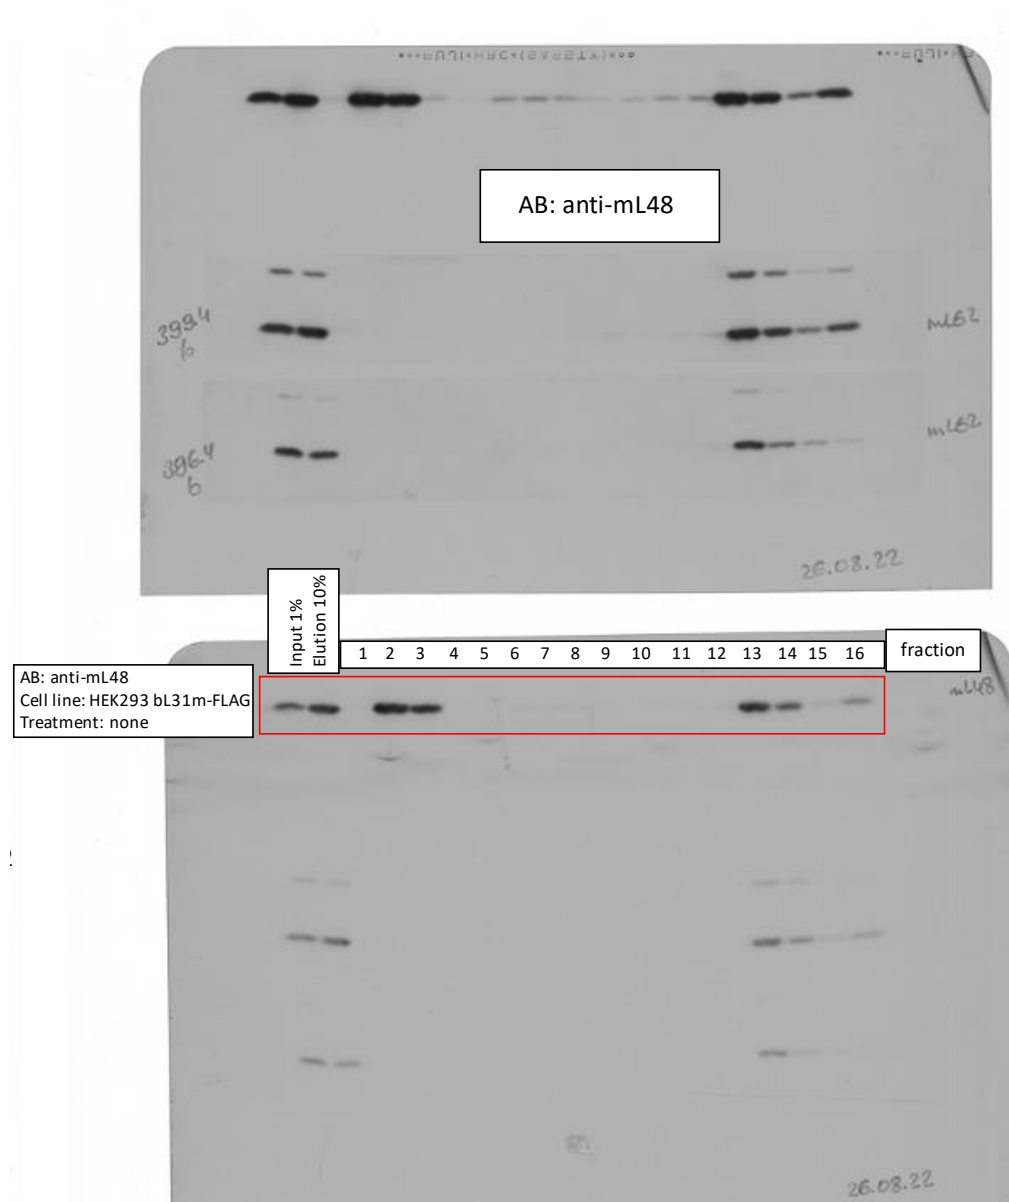

Source Data 3\_related to Extended Data Fig.7b

EL#399.4-6 bL31m-FLAG IP + Gradient

Rotor: SW41 Ti

Gradient: Sucrose 5-30%

Speed: 158.000xg

Time: 15h

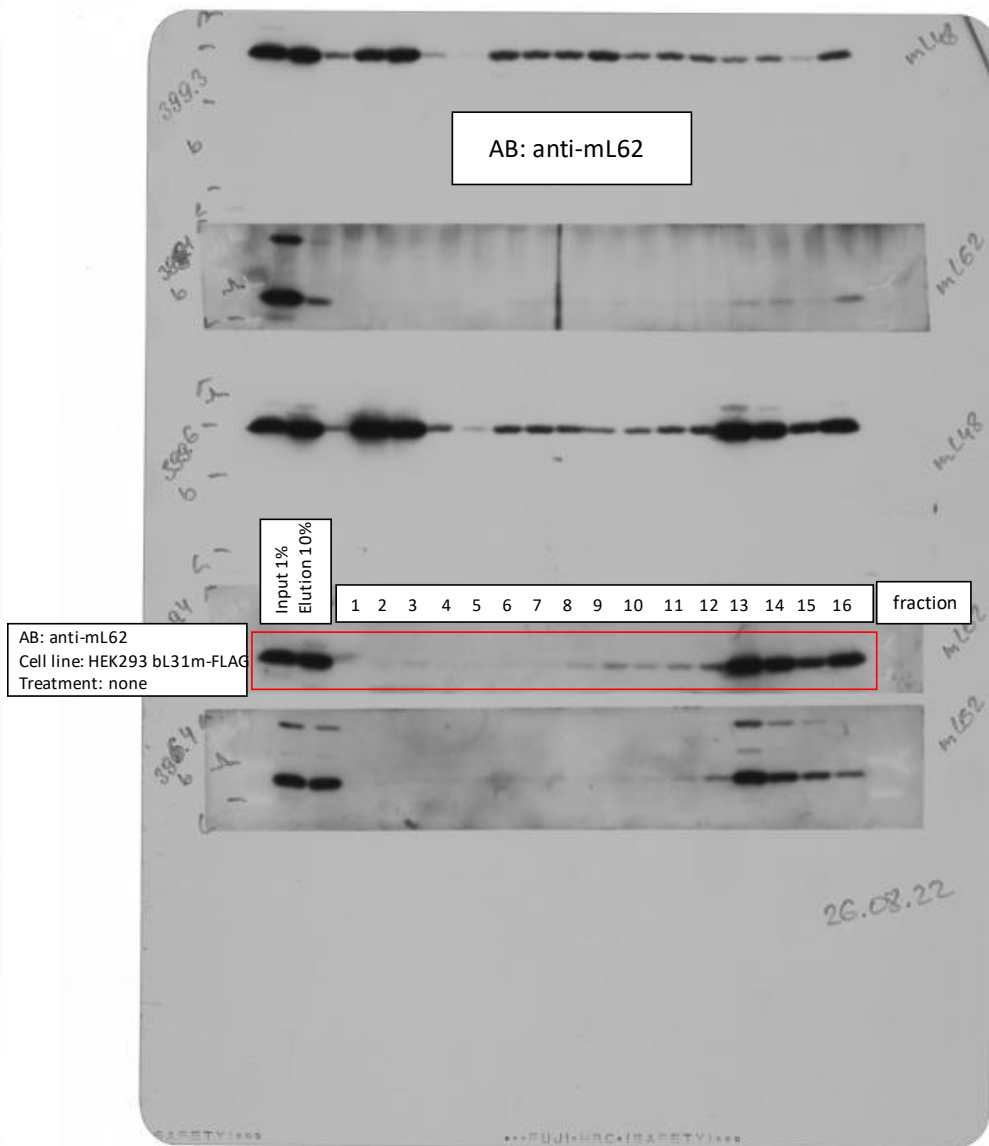

Source Data 3\_related to Extended Data Fig.7b

EL#399.4-6 bL31m-FLAG IP + Gradient

Rotor: SW41 Ti

Gradient: Sucrose 5-30%

Speed: 158.000xg

Time: 15h

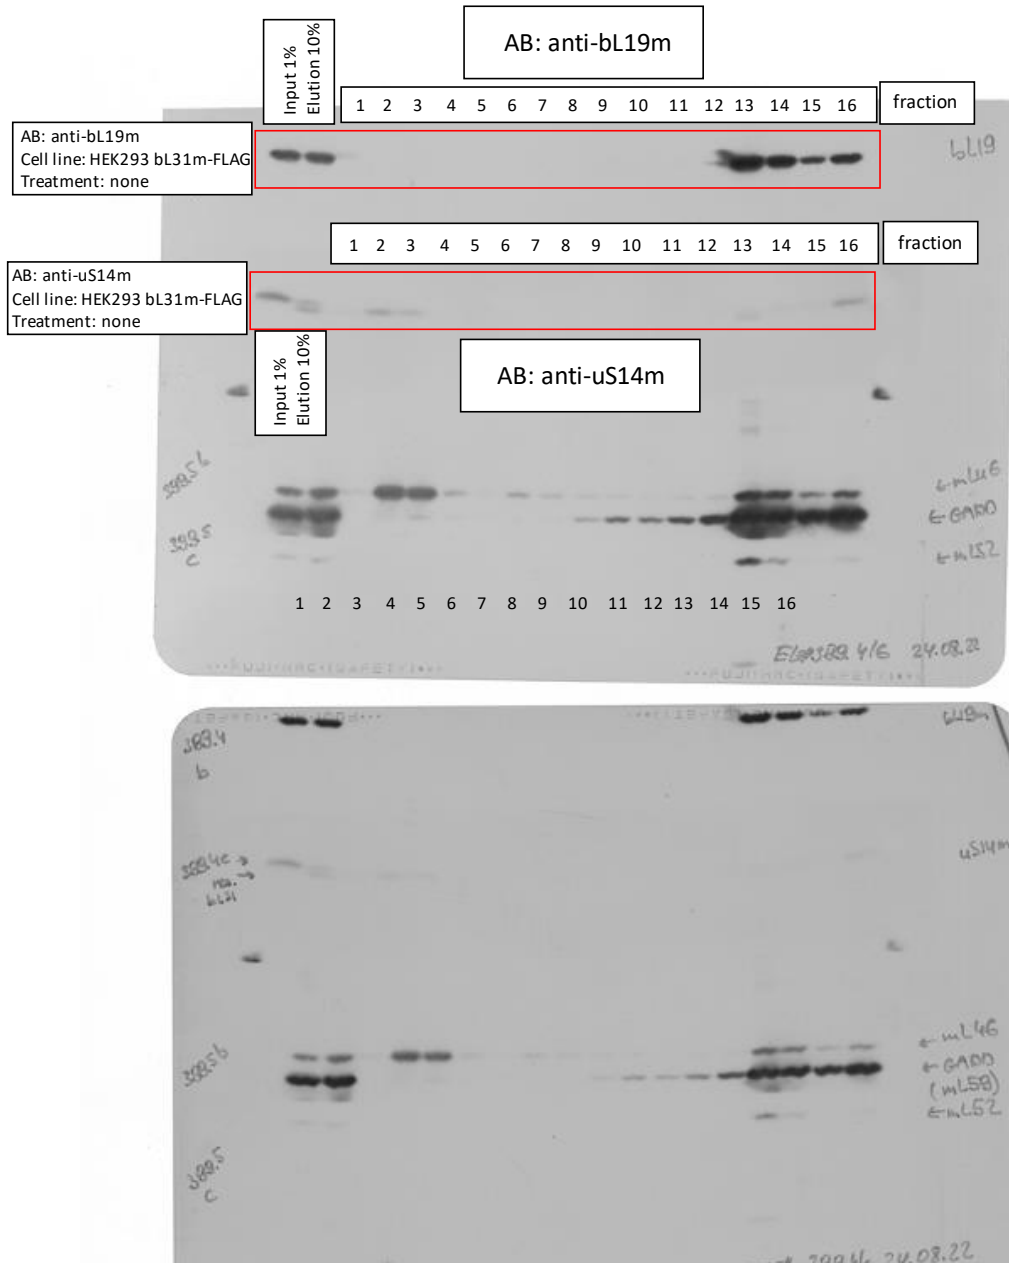

Source Data 3\_related to Extended Data Fig.7b

EL#399.4-6 bl31m-FLAG IP + Gradient

Rotor: SW41 Ti

Gradient: Sucrose 5-30%

Speed: 158.000xg

Time: 15h

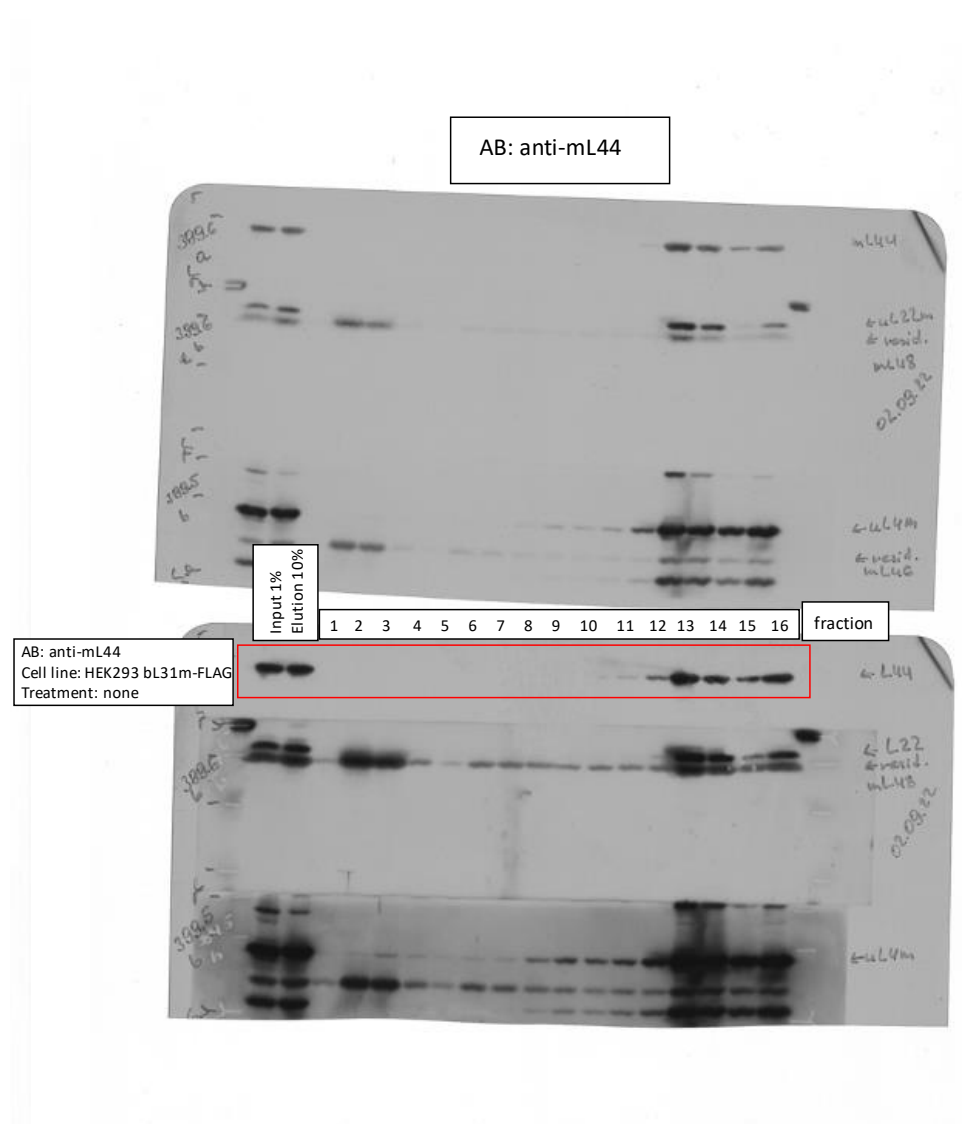

Source Data 3\_related to Extended Data Fig.7b

EL#399.4-6 bL31m-FLAG IP + Gradient

Rotor: SW41 Ti

Gradient: Sucrose 5-30%

Speed: 158.000xg

Time: 15h

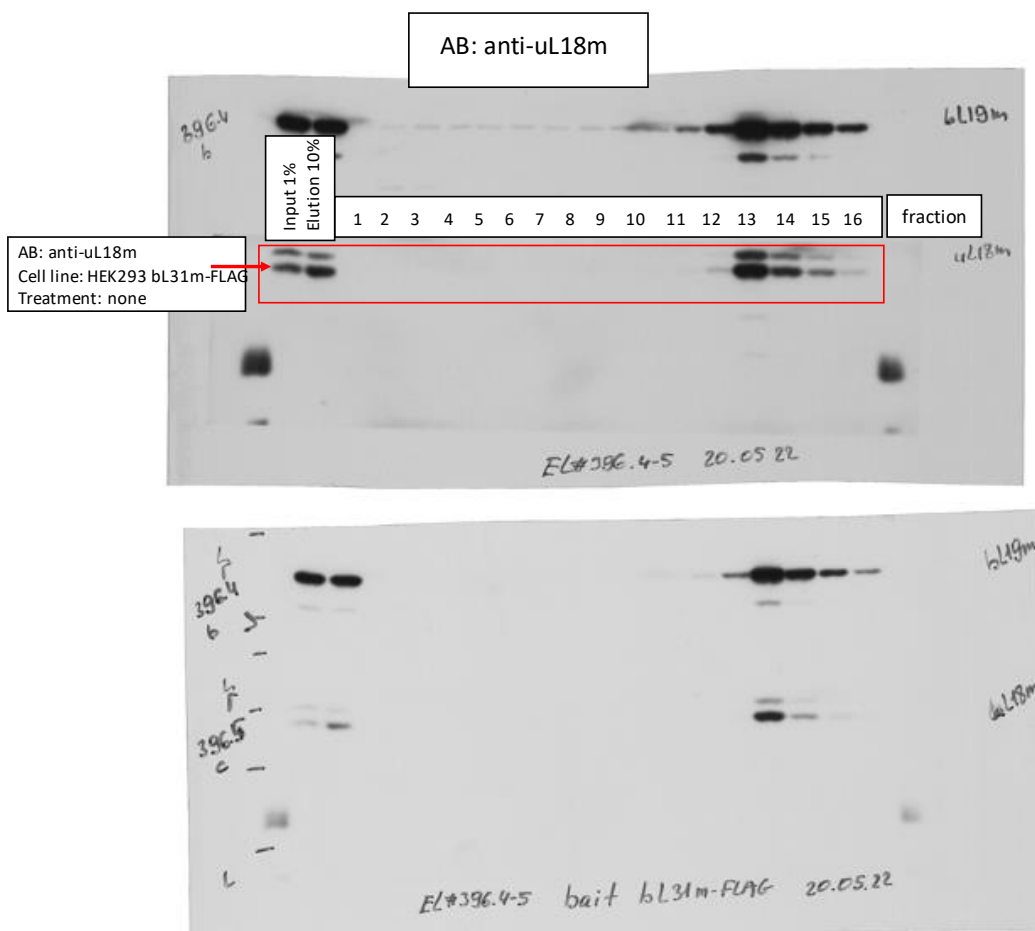

Source Data 3\_related to Extended Data Fig.7c  
EL#363 HEK293 WT + Ethidium Bromide treatment + Gradient  
EL#379 HEK293 WT + Ethidium Bromide treatment + Gradient

Rotor: SW41 Ti  
Gradient: Sucrose 5-30%  
Speed: 158.000xg  
Time: 15h

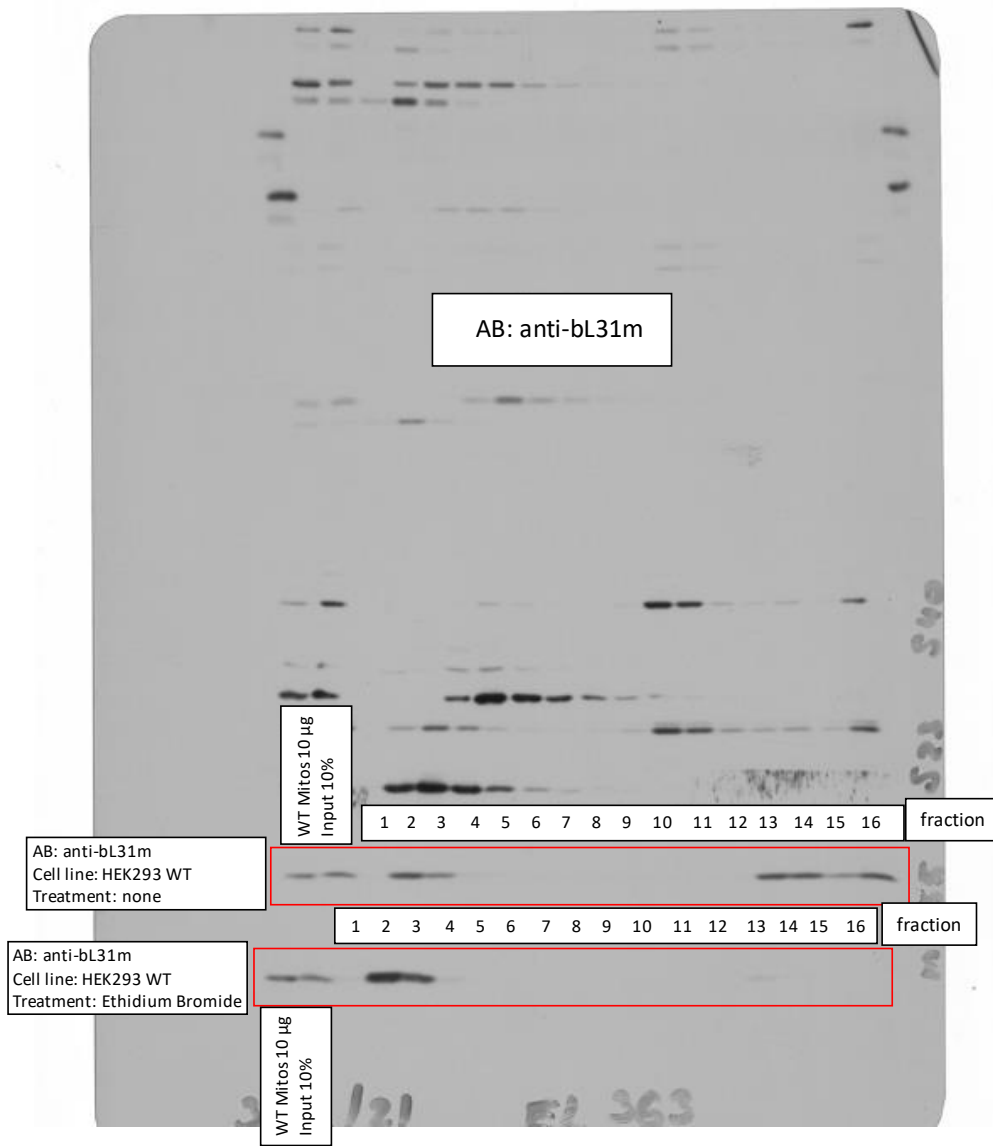



Source Data 3\_related to Extended Data Fig.7c  
EL#363 HEK293 WT + Ethidium Bromide treatment + Gradient  
EL#379 HEK293 WT + Ethidium Bromide treatment + Gradient

Rotor: SW41 Ti  
Gradient: Sucrose 5-30%  
Speed: 158.000xg  
Time: 15h

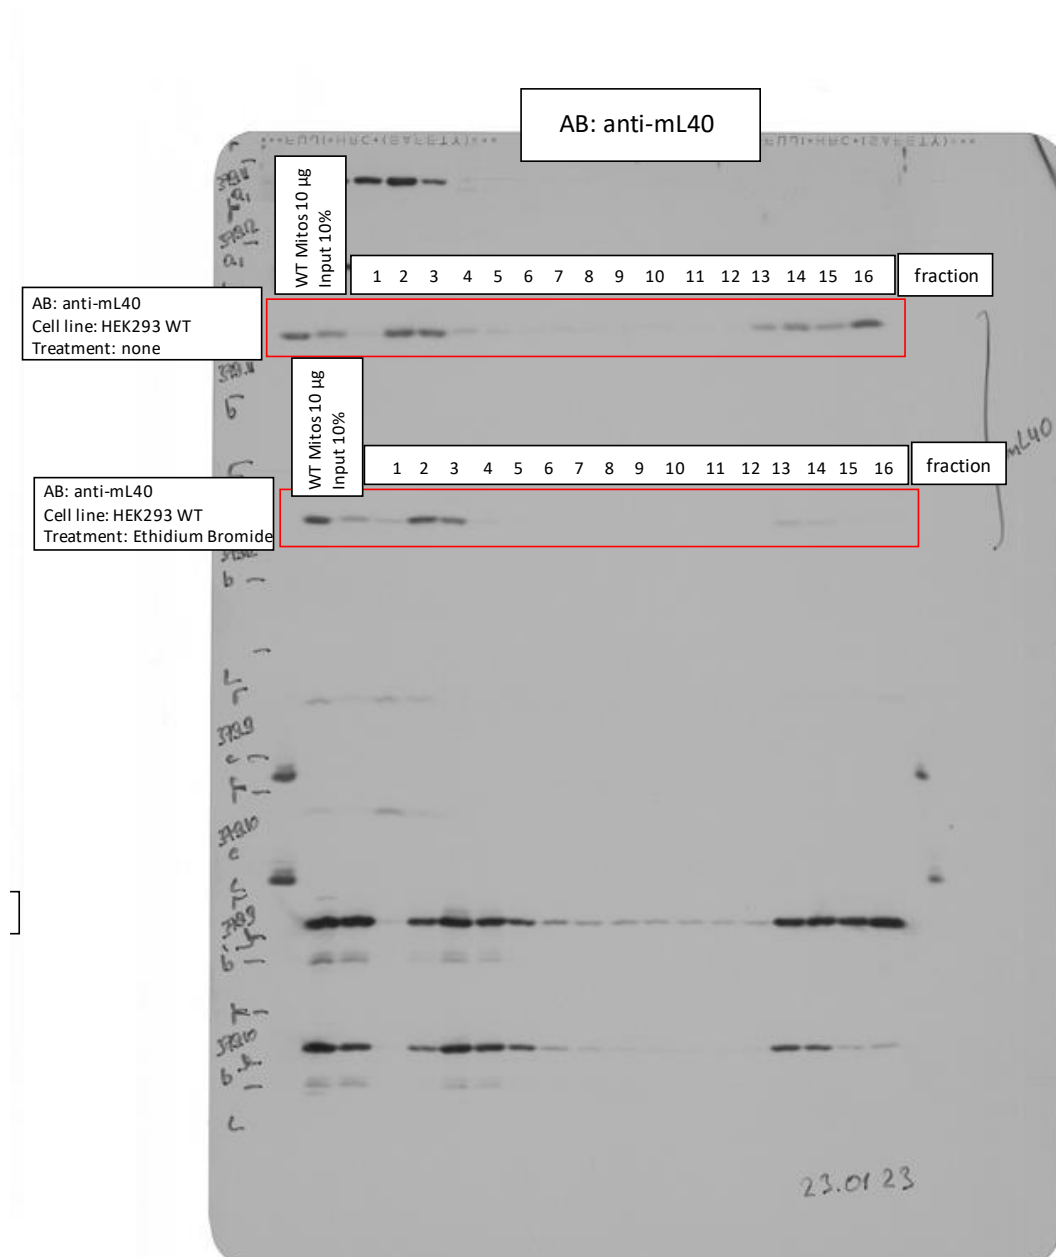

Source Data 3\_related to Extended Data Fig.7c  
 EL#363 HEK293 WT + Ethidium Bromide treatment + Gradient  
 EL#379 HEK293 WT + Ethidium Bromide treatment + Gradient

Rotor: SW41 Ti  
 Gradient: Sucrose 5-30%  
 Speed: 158.000xg  
 Time: 15h

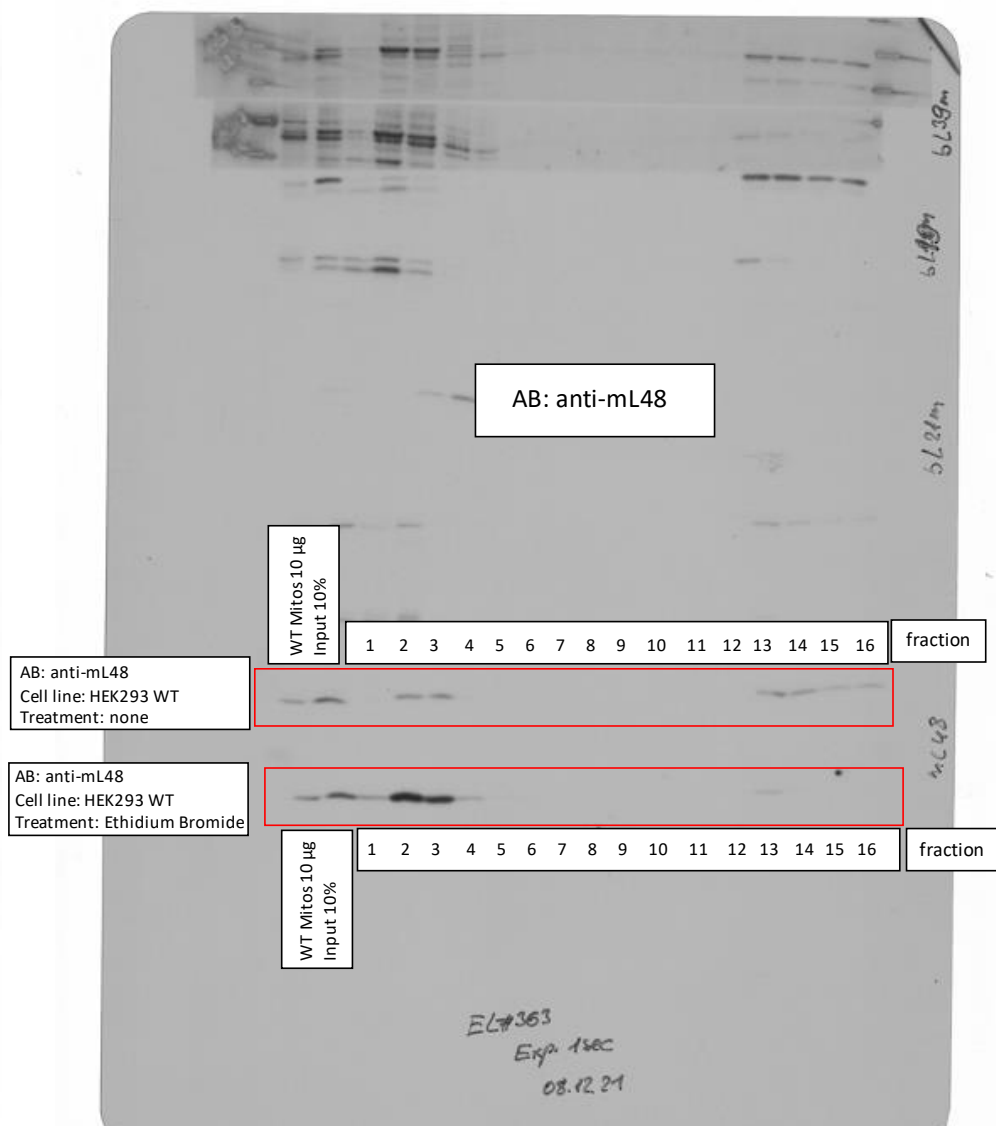

Source Data 3\_related to Extended Data Fig.7c  
EL#363 HEK293 WT + Ethidium Bromide treatment + Gradient  
EL#379 HEK293 WT + Ethidium Bromide treatment + Gradient

Rotor: SW41 Ti  
Gradient: Sucrose 5-30%  
Speed: 158.000xg  
Time: 15h

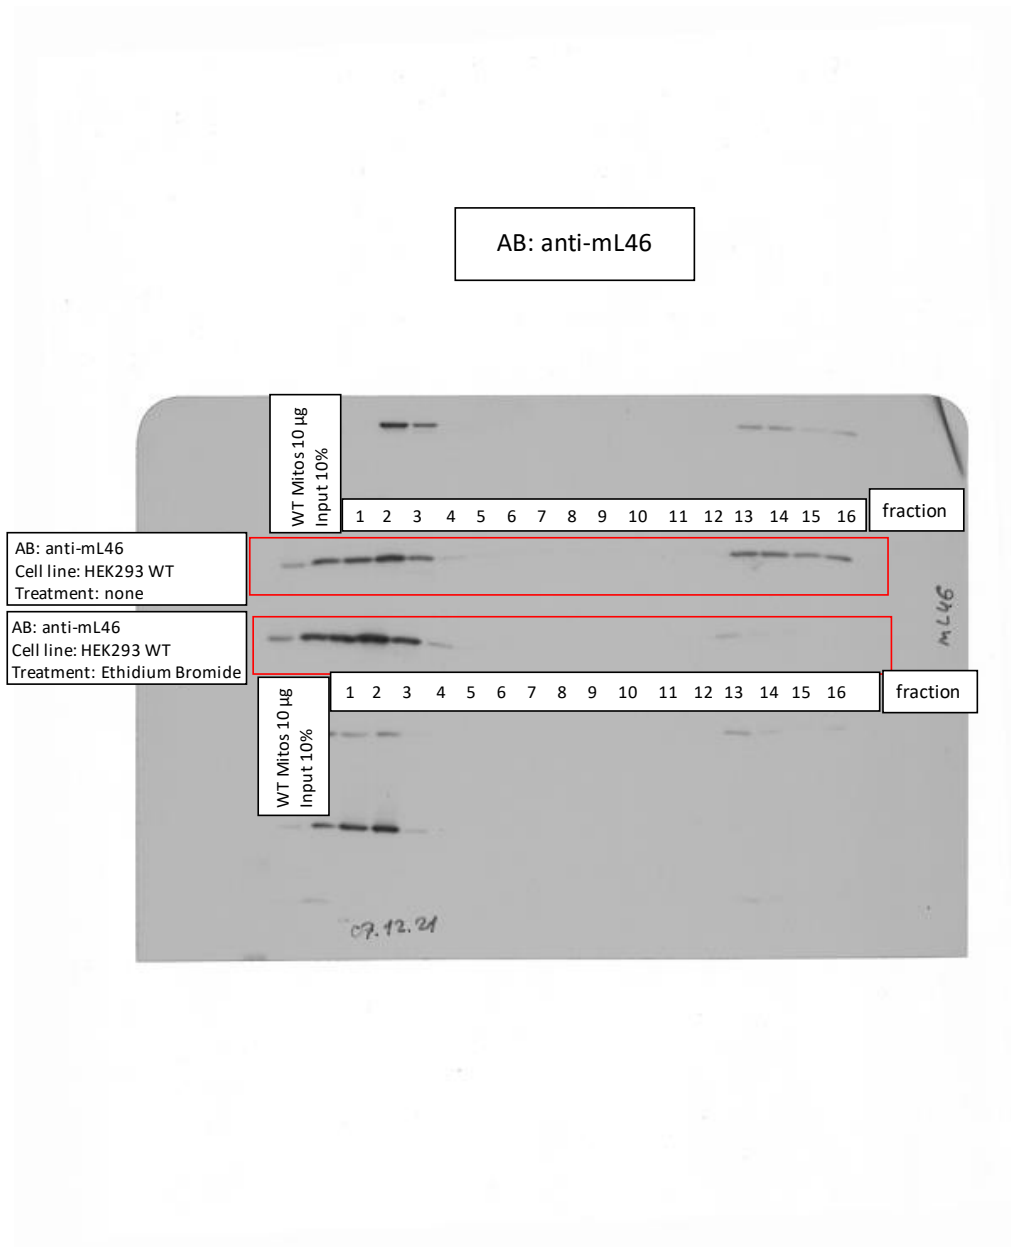

Source Data 3\_related to Extended Data Fig.7c  
EL#363 HEK293 WT + Ethidium Bromide treatment + Gradient  
EL#379 HEK293 WT + Ethidium Bromide treatment + Gradient

Rotor: SW41 Ti  
Gradient: Sucrose 5-30%  
Speed: 158.000xg  
Time: 15h

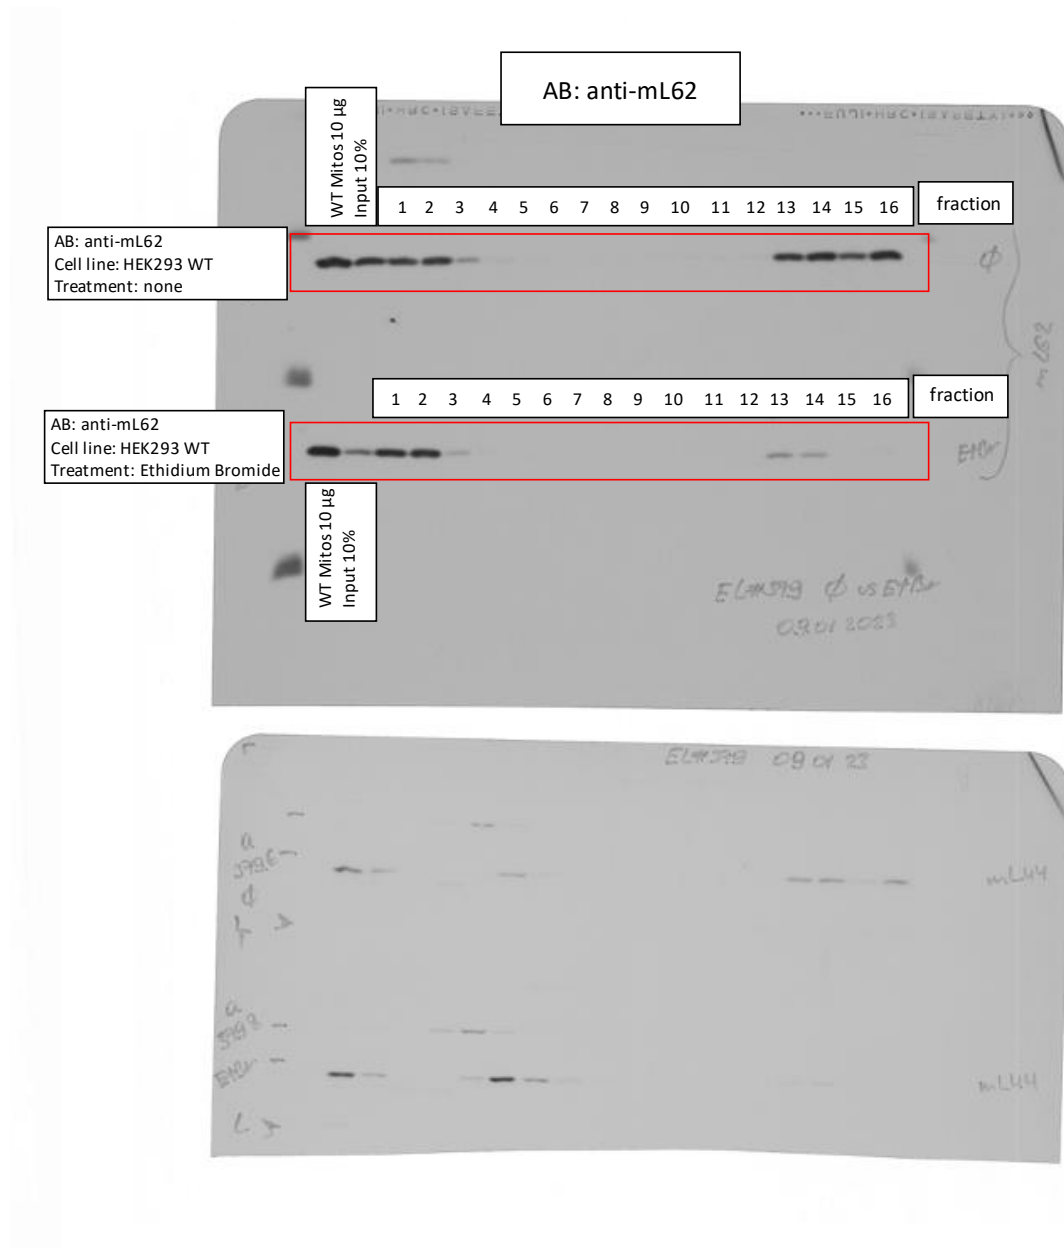

Source Data 3\_related to Extended Data Fig.7c  
EL#363 HEK293 WT + Ethidium Bromide treatment + Gradient  
EL#379 HEK293 WT + Ethidium Bromide treatment + Gradient

Rotor: SW41 Ti  
Gradient: Sucrose 5-30%  
Speed: 158.000xg  
Time: 15h

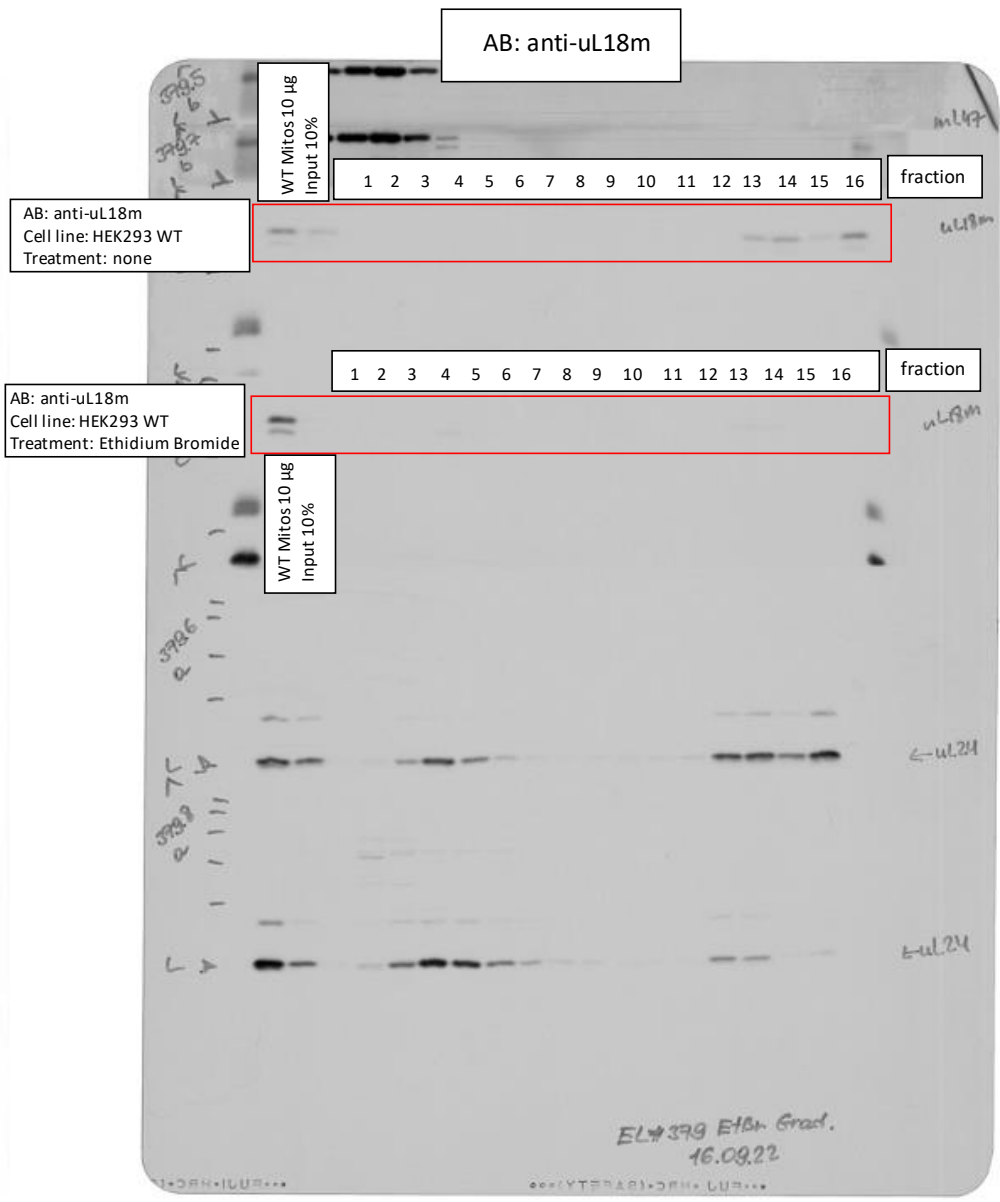

Source Data 3\_related to Extended Data Fig.7c  
 EL#363 HEK293 WT + Ethidium Bromide treatment + Gradient  
 EL#379 HEK293 WT + Ethidium Bromide treatment + Gradient

Rotor: SW41 Ti  
 Gradient: Sucrose 5-30%  
 Speed: 158.000xg  
 Time: 15h

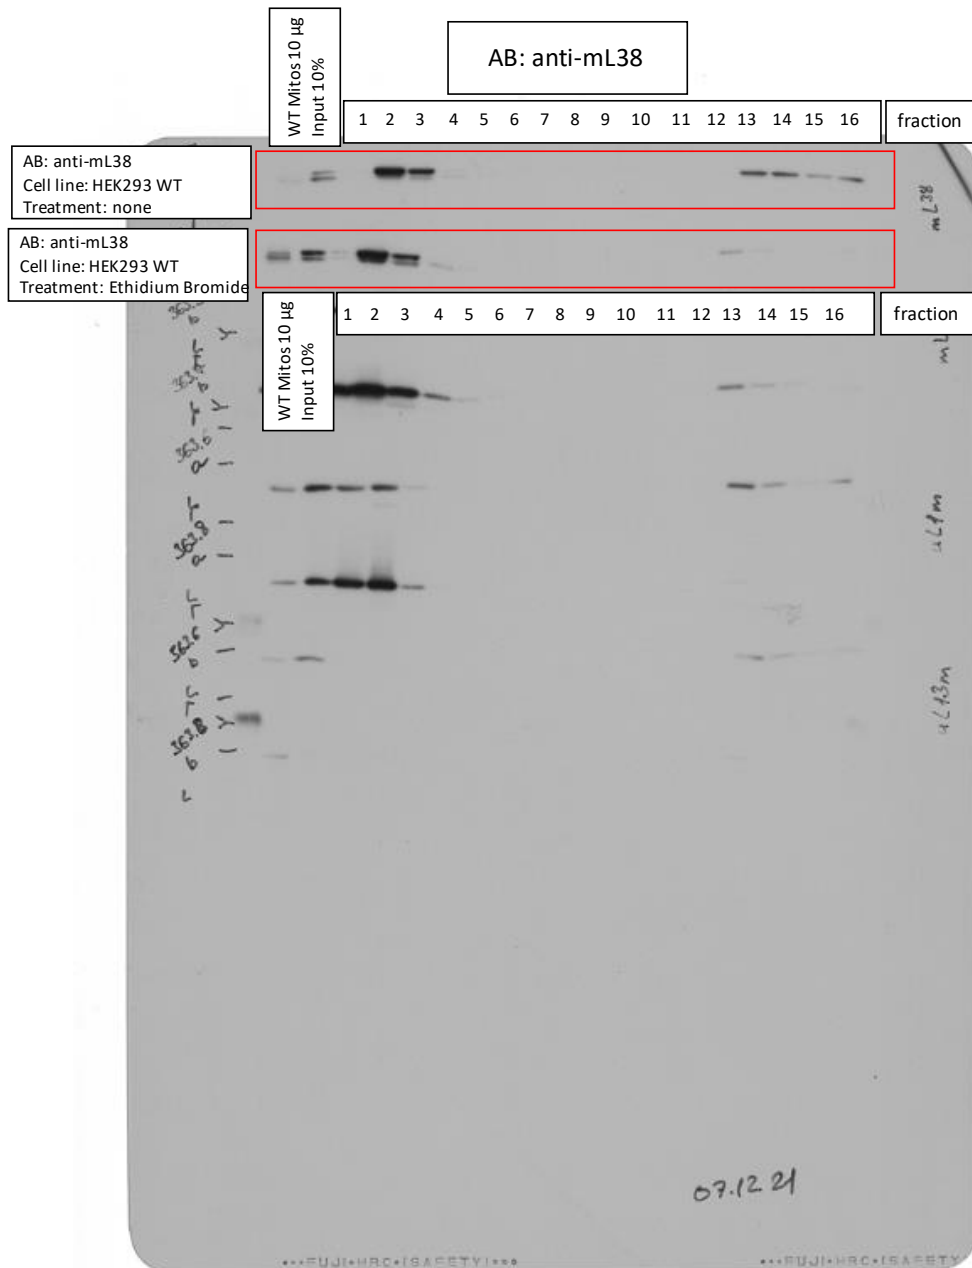

Source Data 3\_related to Extended Data Fig.7d

VC#154 HEK293 WT vs. HEK293 mL62 KO

Rotor: SW41 Ti

Gradient: Sucrose 5-30%

Speed: 21500xg

Time: 15h

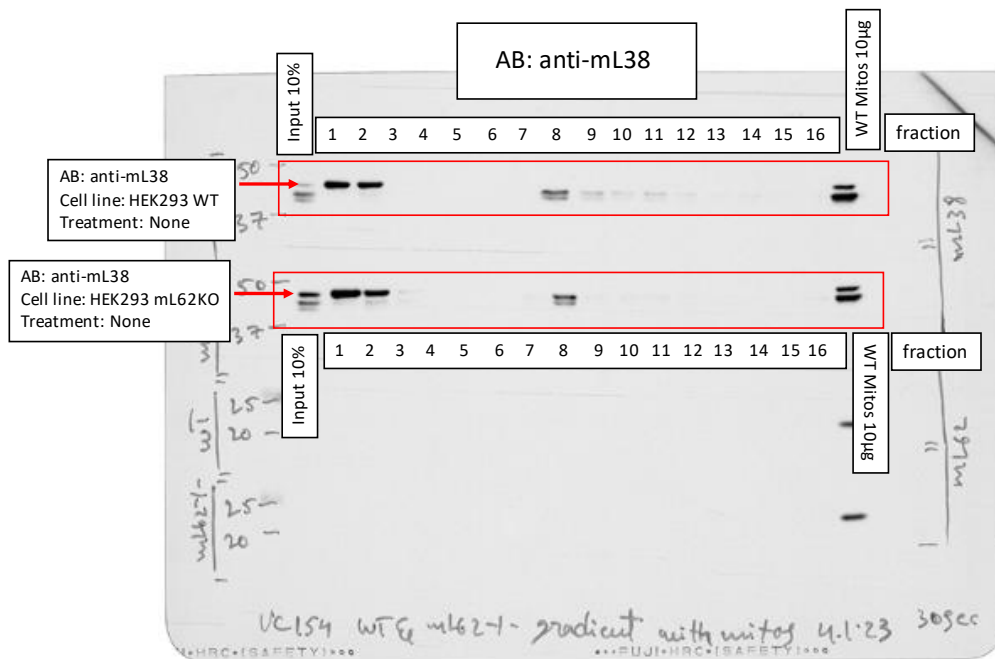

Source Data 3\_related to Extended Data Fig.7d

VC#154 HEK293 WT vs. HEK293 mL62 KO

Rotor: SW41 Ti

Gradient: Sucrose 5-30%

Speed: 21500xg

Time: 15h

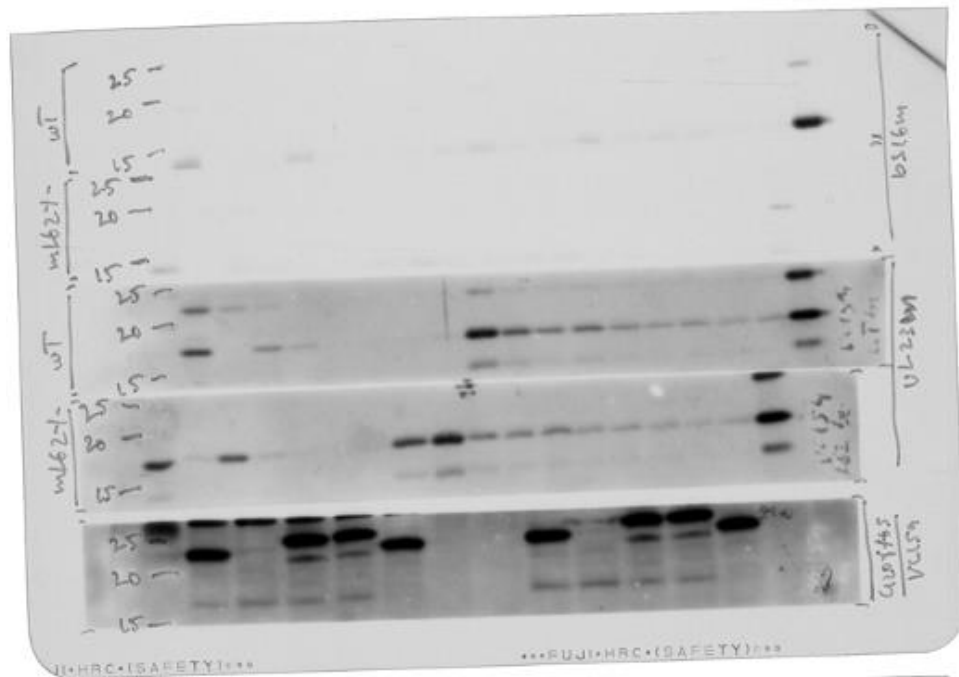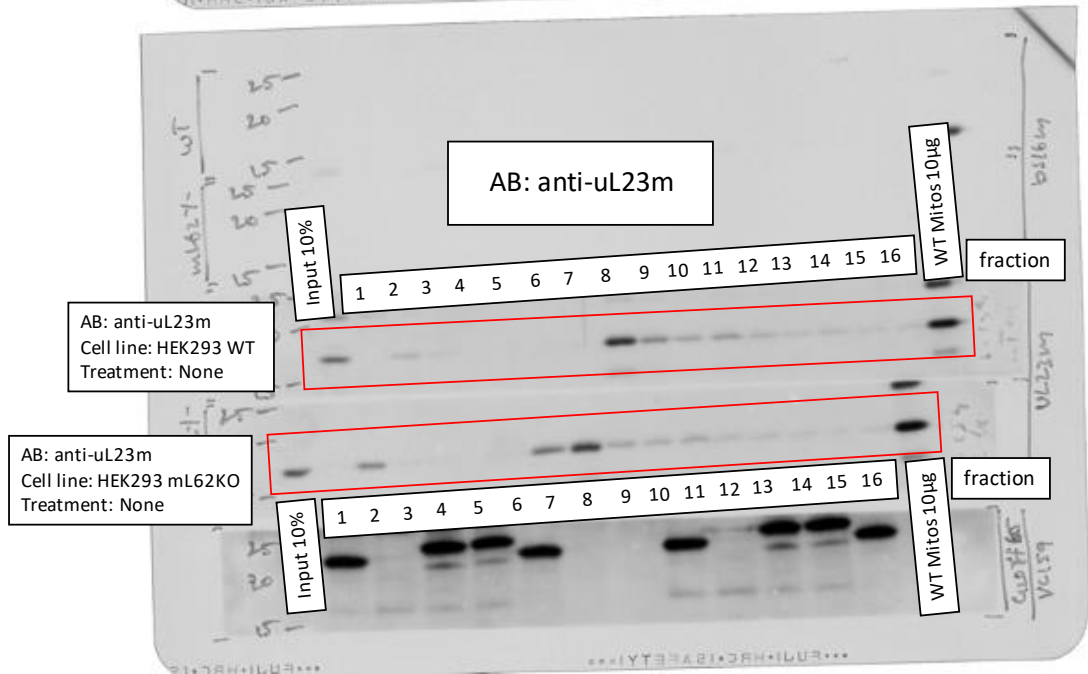



Source Data 3\_related to Extended Data Fig.7d

VC#154 HEK293 WT vs. HEK293 mL62 KO

Rotor: SW41 Ti

Gradient: Sucrose 5-30%

Speed: 21500xg

Time: 15h

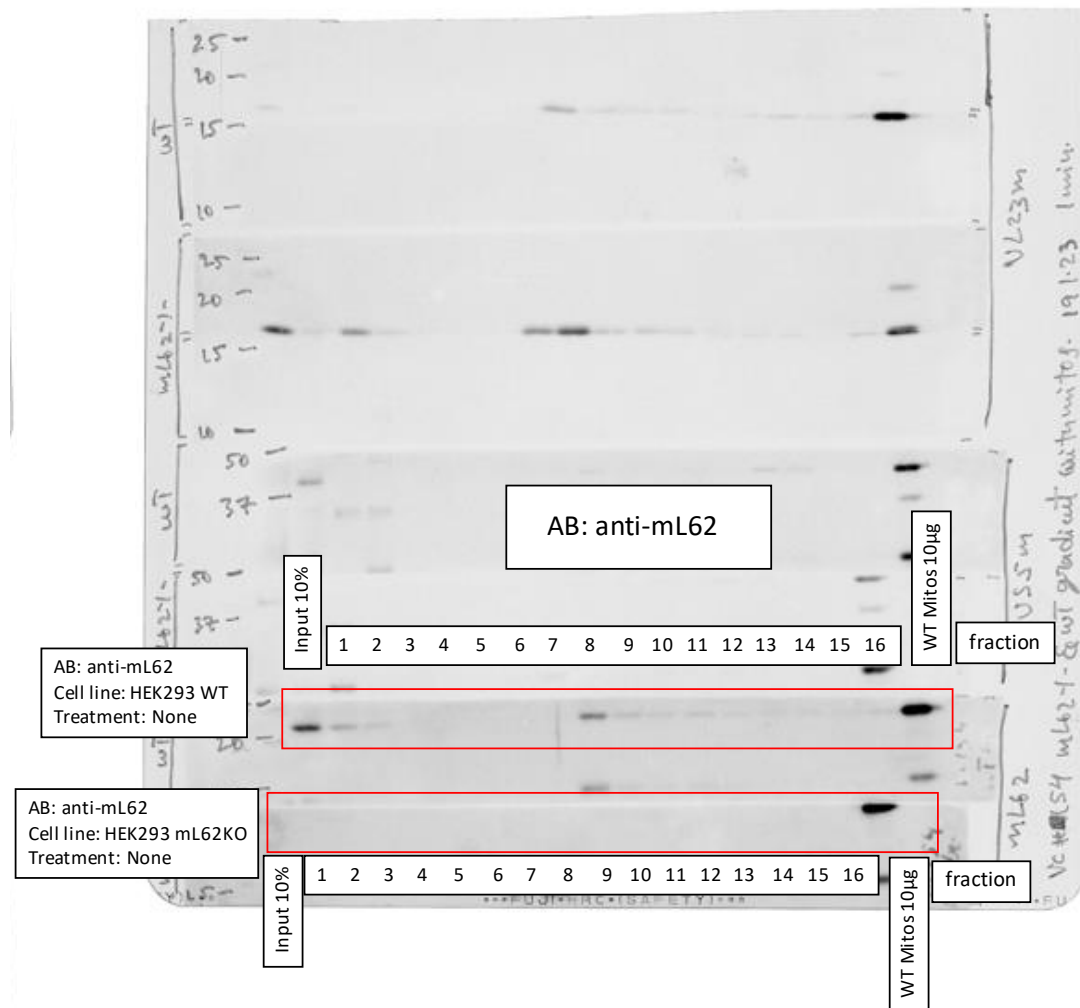

Source Data 3\_related to Extended Data Fig.7d

VC#154 HEK293 WT vs. HEK293 mL62 KO

Rotor: SW41 Ti

Gradient: Sucrose 5-30%

Speed: 21500xg

Time: 15h

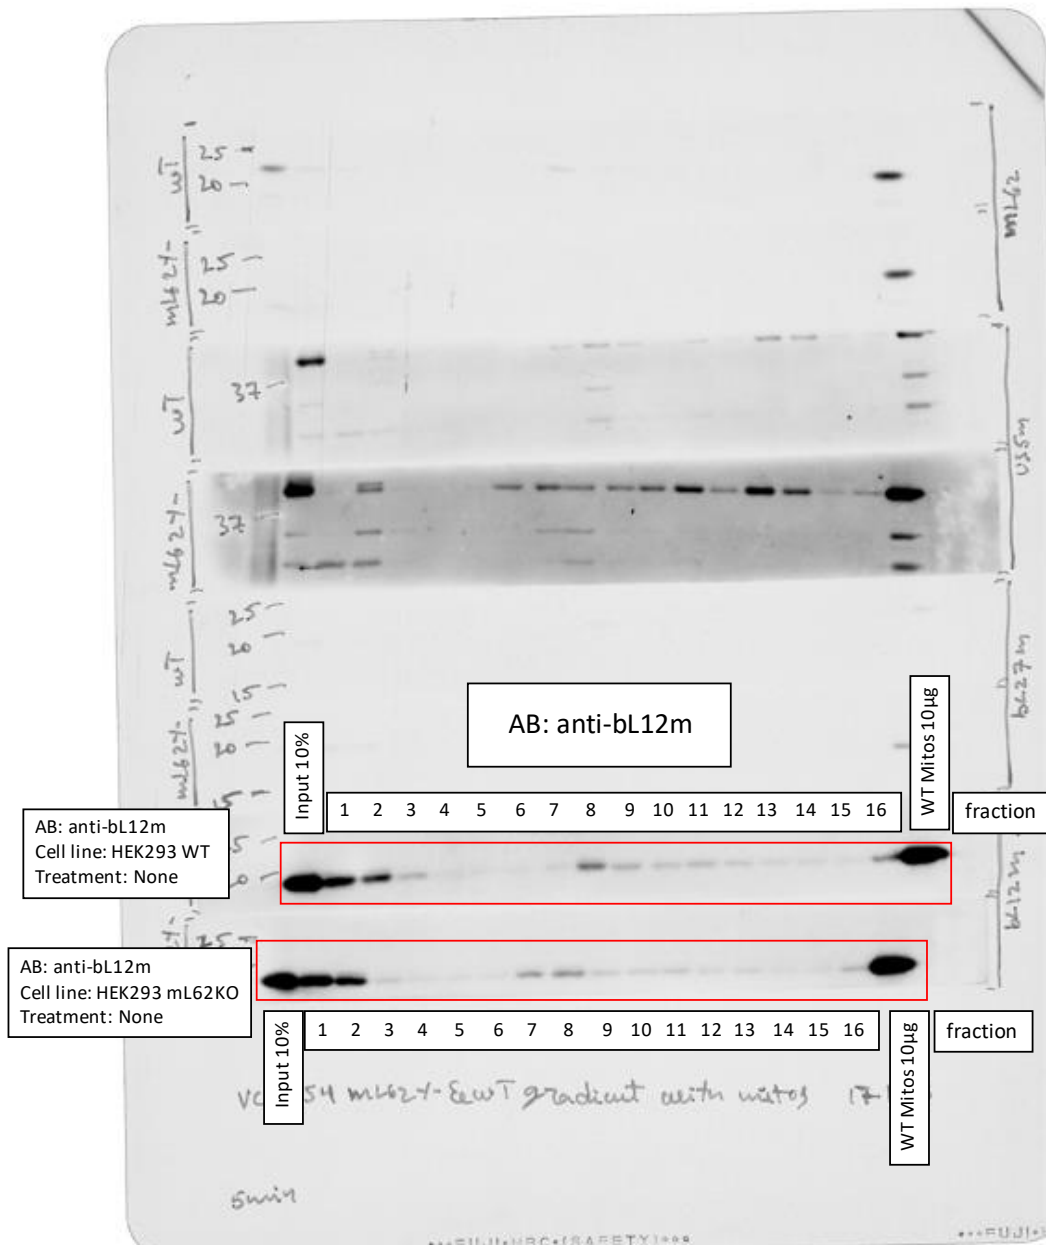



Source Data 3\_related to Extended Data Fig.7d

VC#154 HEK293 WT vs. HEK293 mL62 KO

Rotor: SW41 Ti

Gradient: Sucrose 5-30%

Speed: 21500xg

Time: 15h

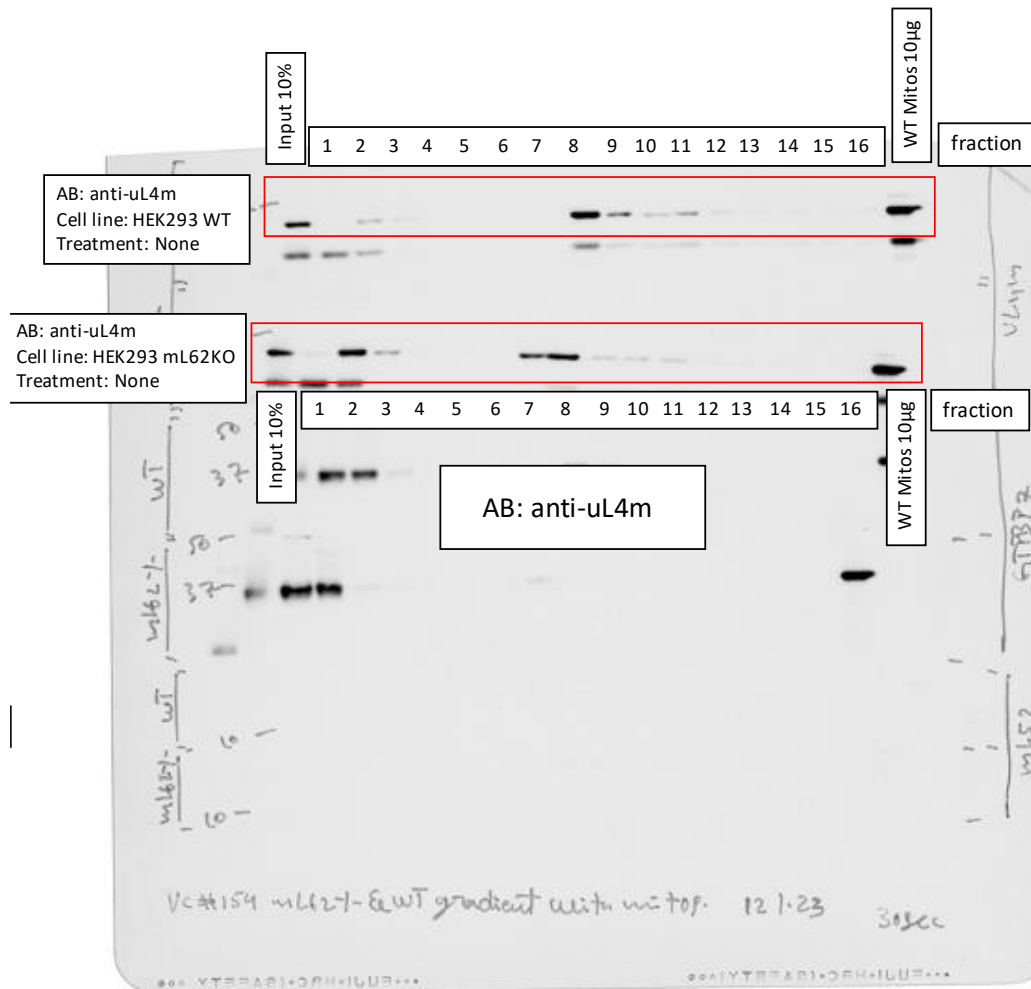

Source Data 3\_related to Extended Data Fig.7d

VC#154 HEK293 WT vs. HEK293 mL62 KO

Rotor: SW41 Ti

Gradient: Sucrose 5-30%

Speed: 21500xg

Time: 15h

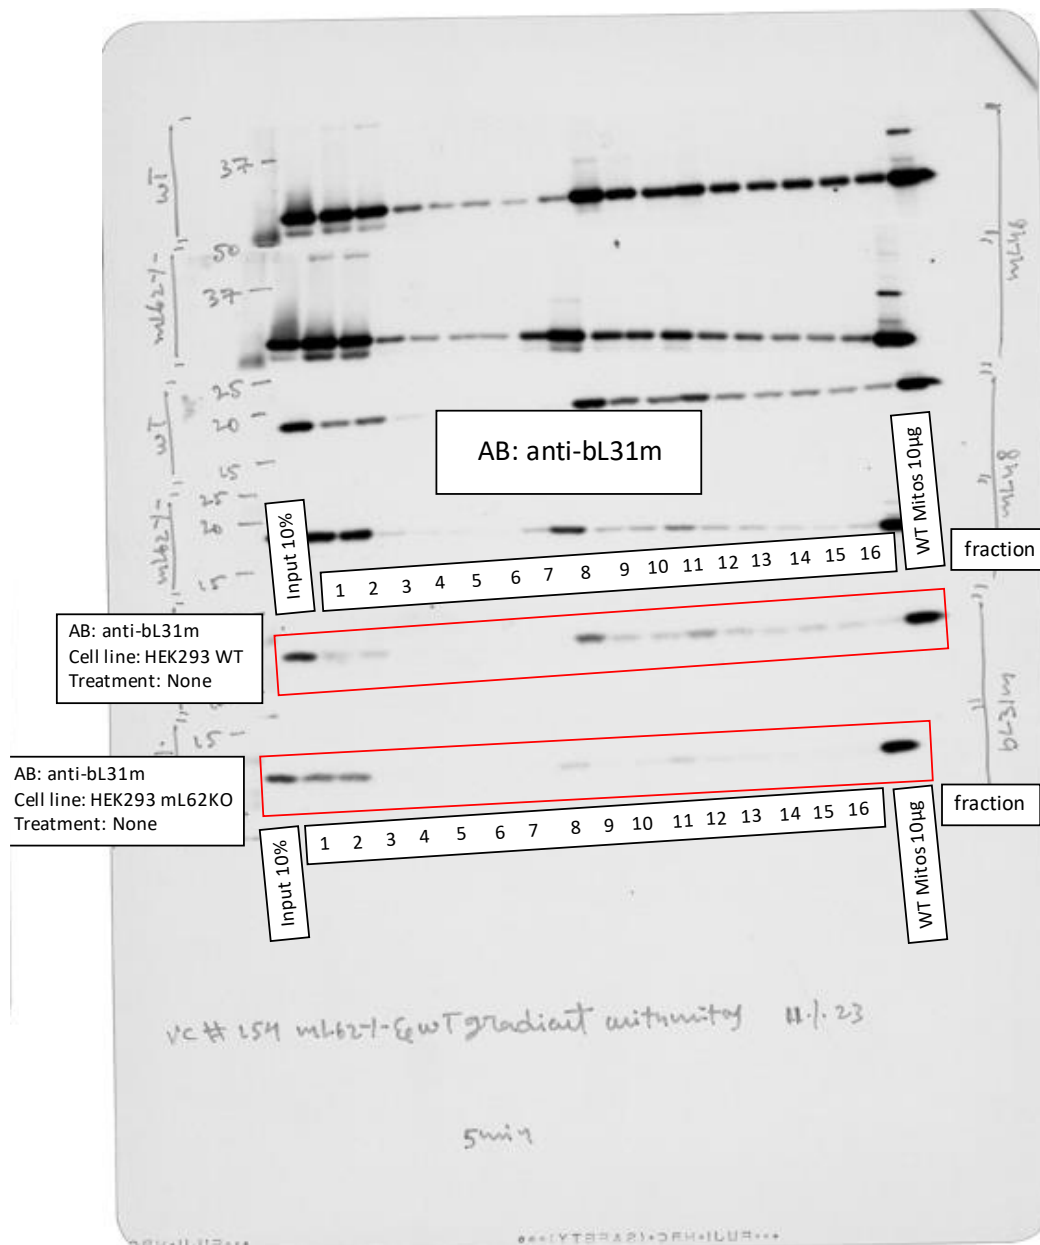

Source Data 3\_related to Extended Data Fig.7d

VC#154 HEK293 WT vs. HEK293 mL62 KO

Rotor: SW41 Ti

Gradient: Sucrose 5-30%

Speed: 21500xg

Time: 15h

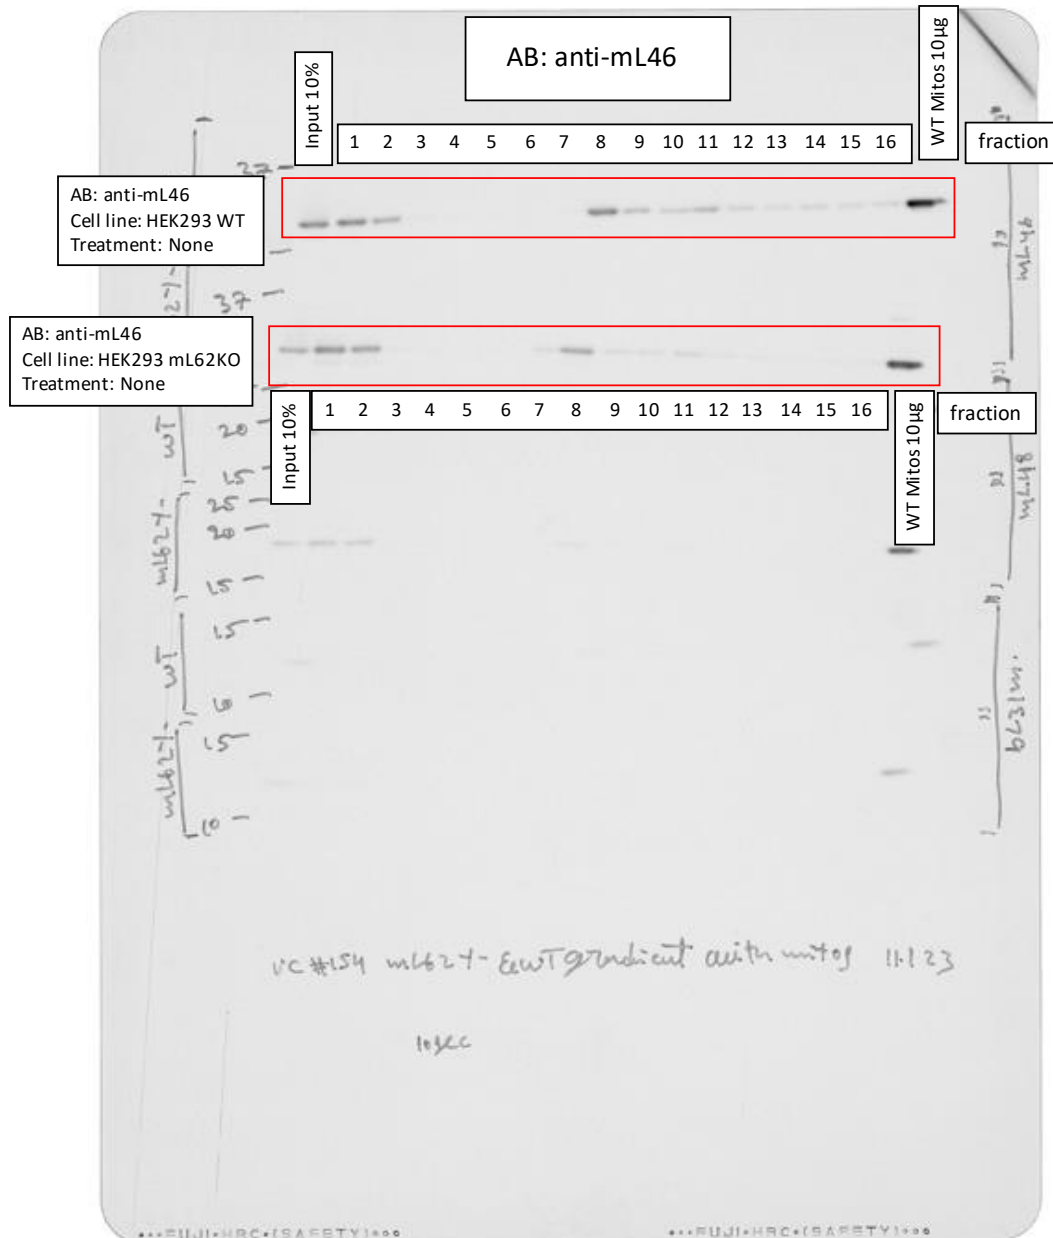

Source Data 3\_related to Extended Data Fig.7d

VC#154 HEK293 WT vs. HEK293 mL62 KO

Rotor: SW41 Ti

Gradient: Sucrose 5-30%

Speed: 21500xg

Time: 15h

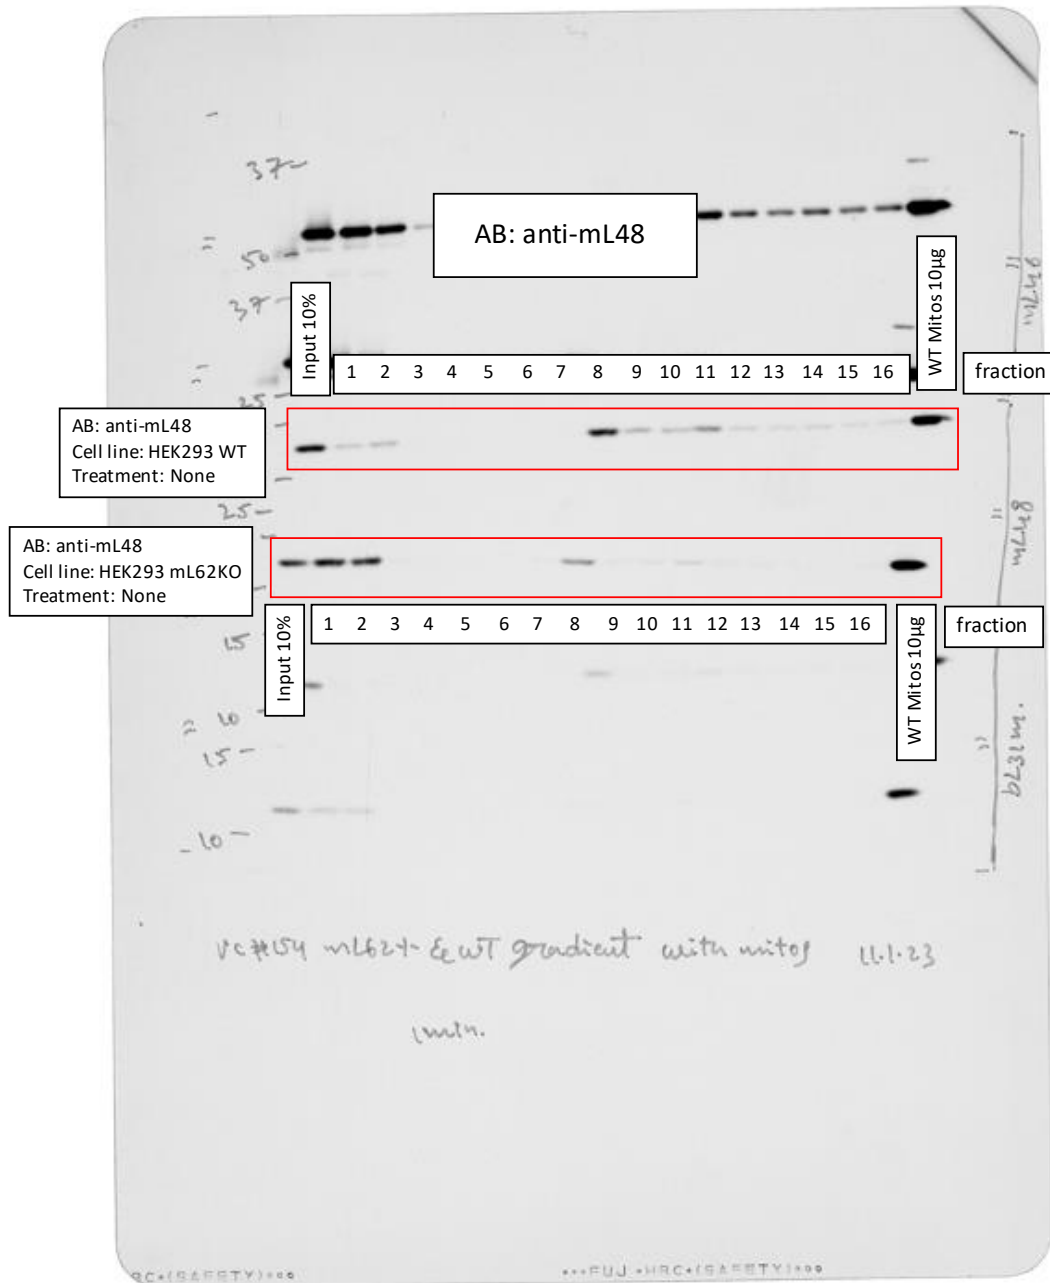

Source Data 3\_related to Extended Data Fig.7d

VC#154 HEK293 WT vs. HEK293 mL62 KO

Rotor: SW41 Ti

Gradient: Sucrose 5-30%

Speed: 21500xg

Time: 15h

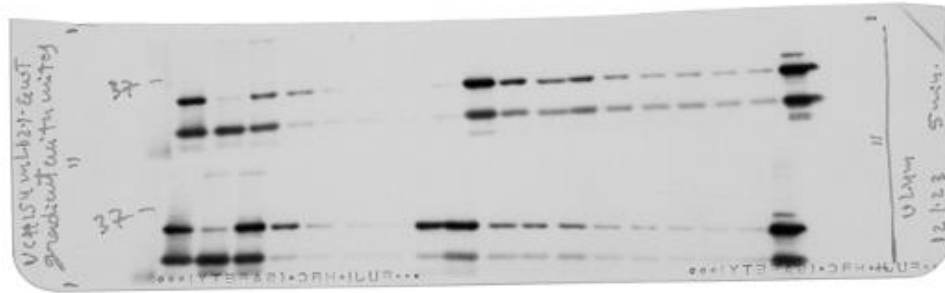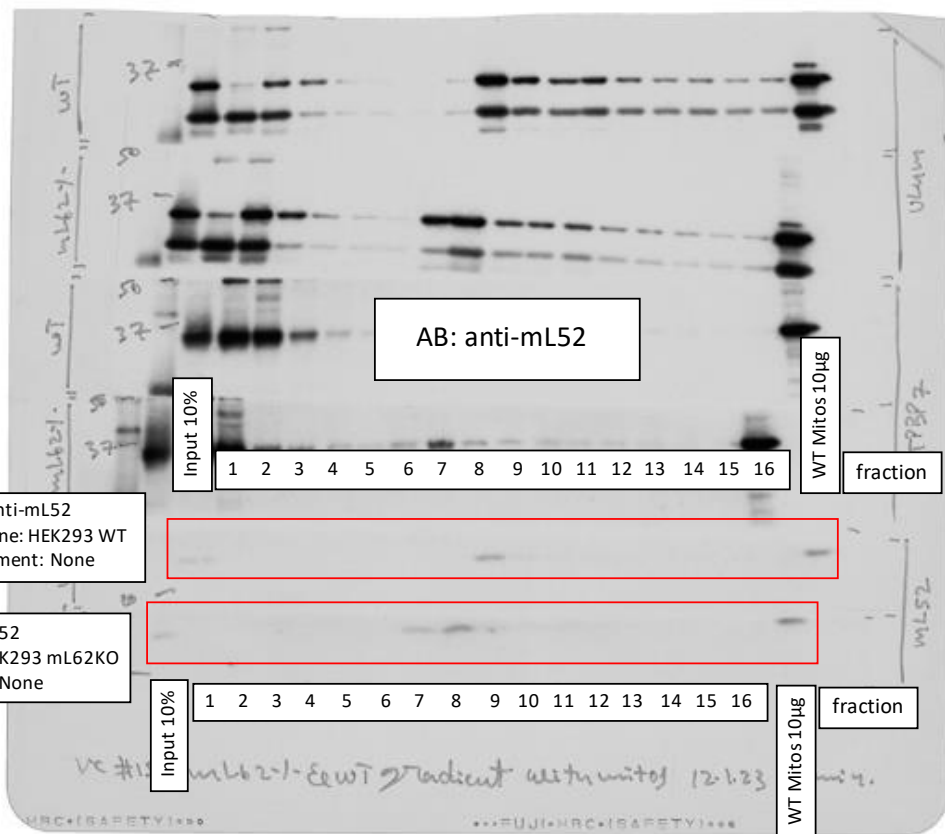



Source Data 3\_related to Extended Data Fig.7d

VC#154 HEK293 WT vs. HEK293 mL62 KO

Rotor: SW41 Ti

Gradient: Sucrose 5-30%

Speed: 21500xg

Time: 15h

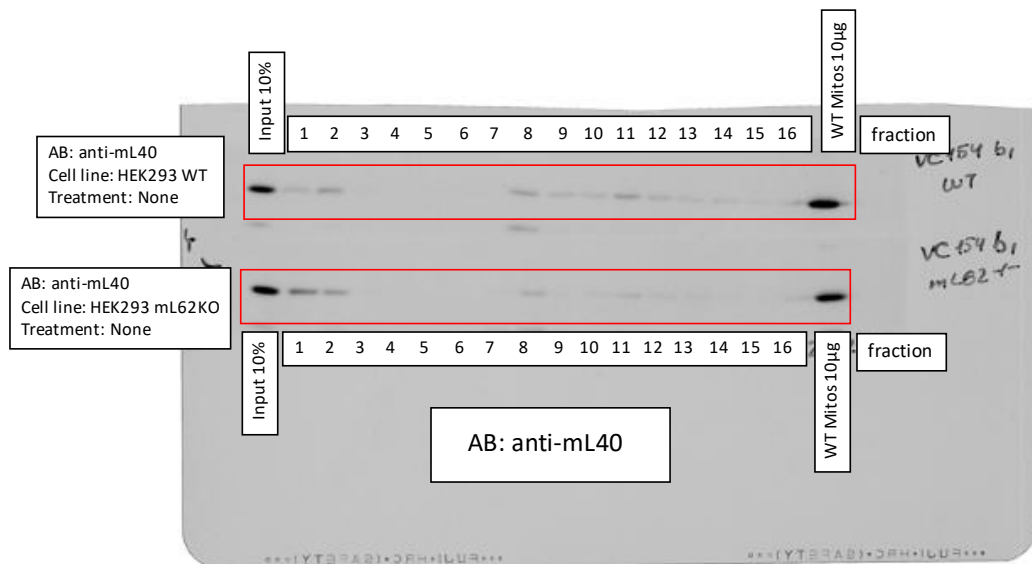

Source Data 3\_related to Extended Data Fig.7d

VC#154 HEK293 WT vs. HEK293 mL62 KO

Rotor: SW41 Ti

Gradient: Sucrose 5-30%

Speed: 21500xg

Time: 15h

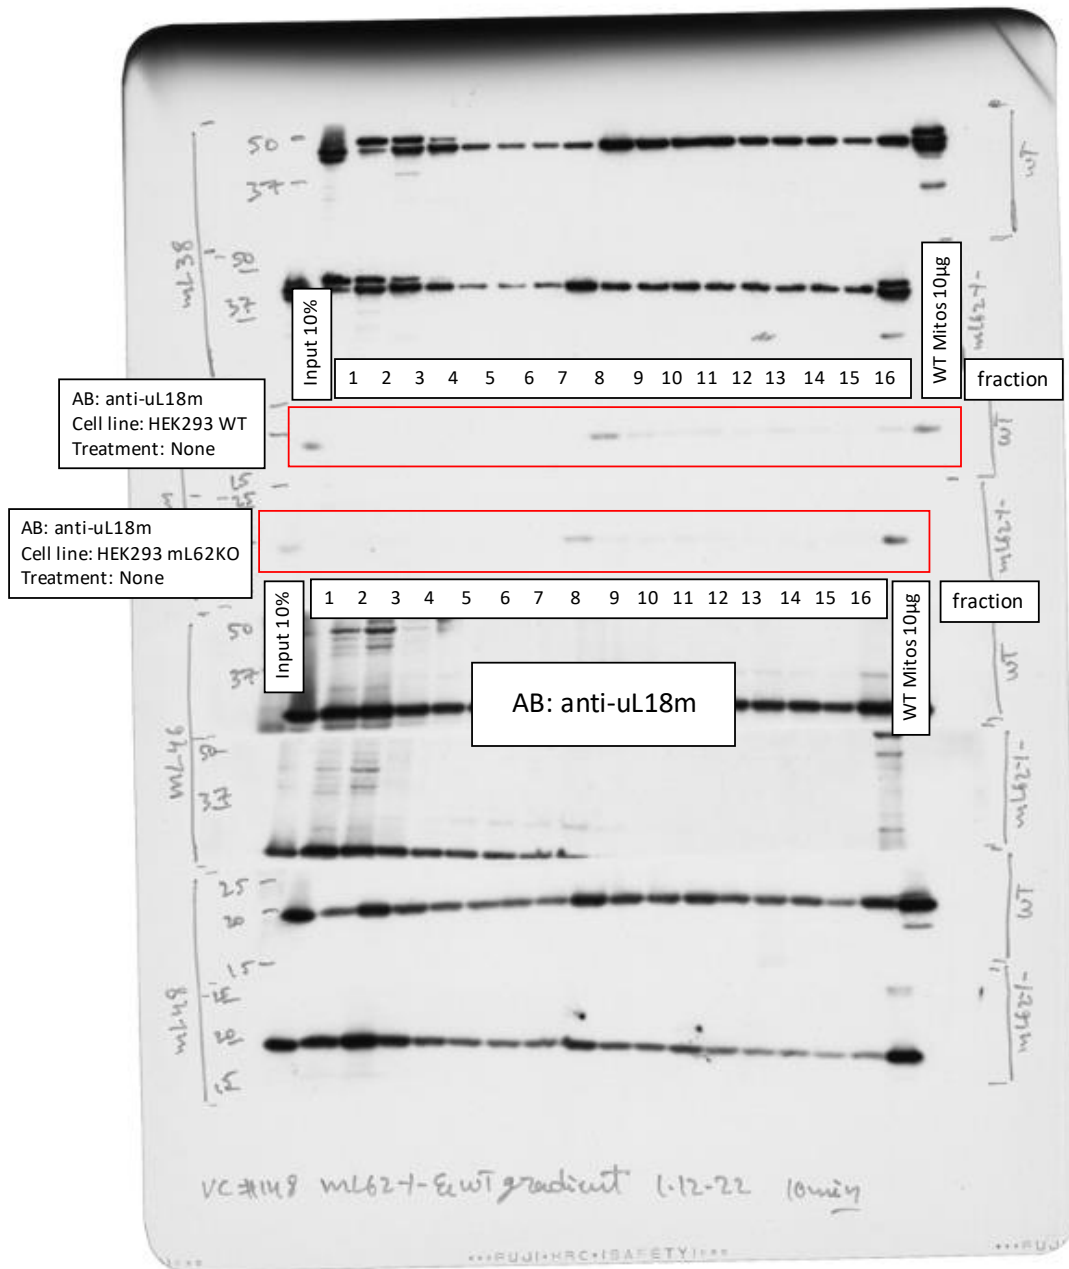

Source Data 3\_related to Extended Data Fig.7e  
 VC#131 mL62KO and mL62KO +mL62FLAG 35S methionin labeling  
 Concentration of Radio activity: 200 $\mu$ Ci/mL  
 Incubation Time: 1h

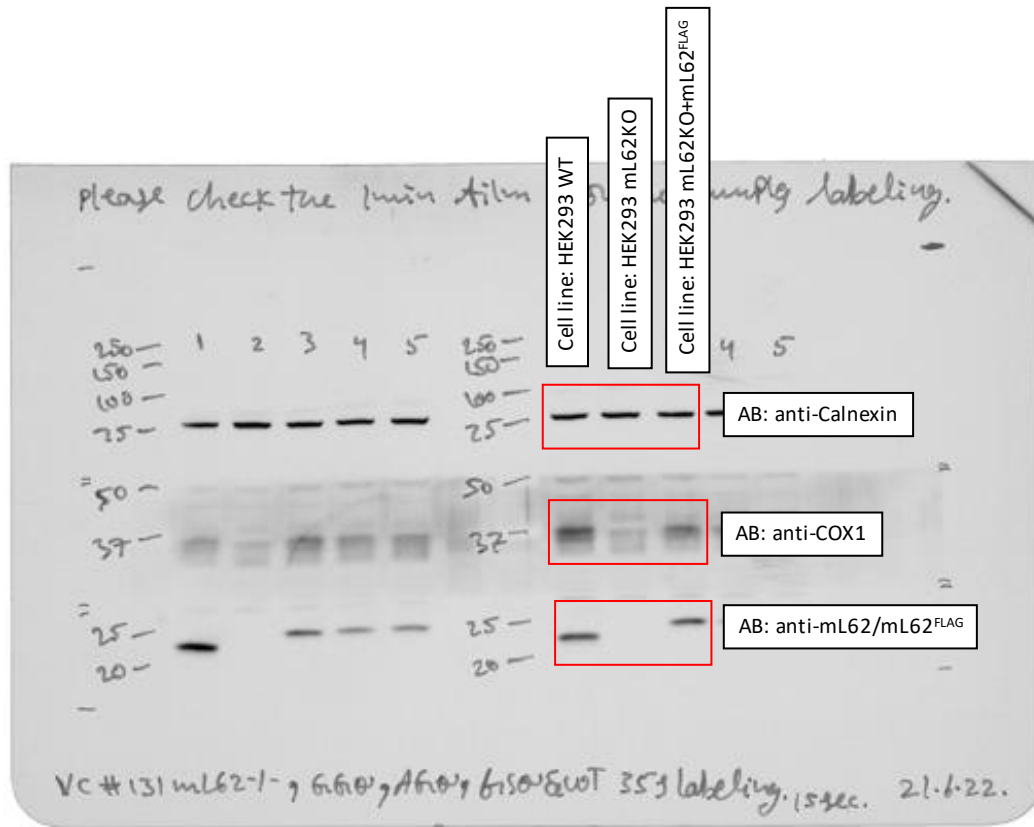

Source Data 3\_related to Extended Data Fig.7e  
VC#131 mL62KO and mL62KO +mL62FLAG 35S methionin labeling  
Concentration of Radio activity: 200 $\mu$ Ci/mL  
Incubation Time: 1h

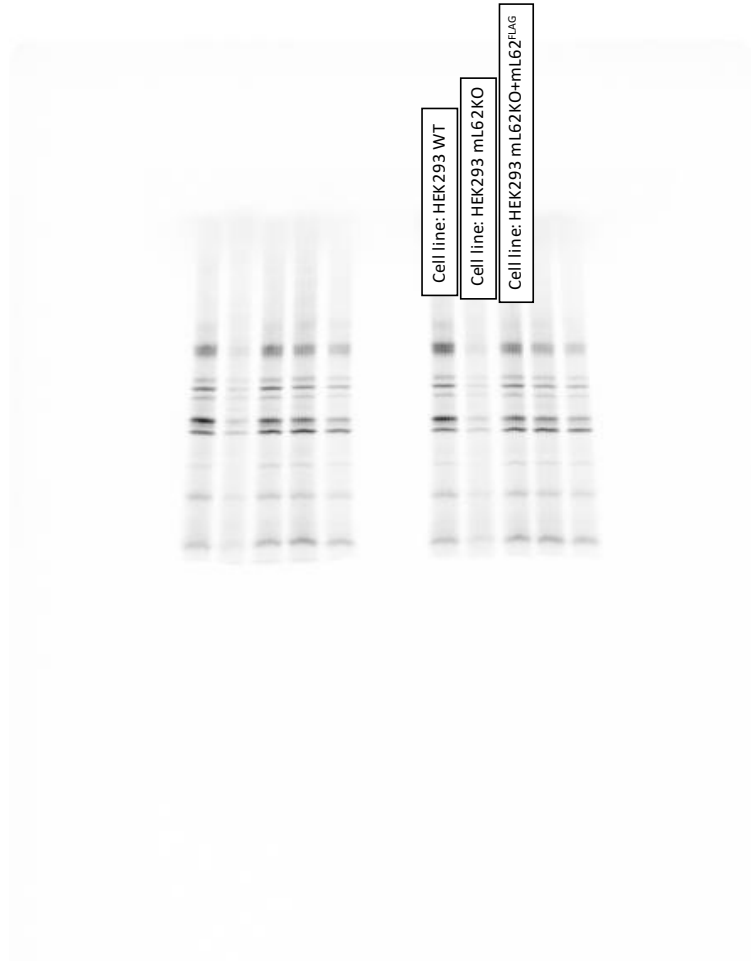

Supplement: 41594_2024_1356_MOESM24_ESM.pdf [file 41594_2024_1356_MOESM24_ESM.pdf]
