# Supplementary material for: A roadmap for ribosome assembly in human mitochondria
Source: PubMed Central journal article supplement (PMC11638073; doi:10.1038/s41594-024-01356-w), 2024-07-11

Source Data 4\_related to Extended Data Fig.8a

EL#377.1-3 uL11m-FLAG IP + Gradient

Rotor: SW41 Ti

Gradient: Sucrose 5-30%

Speed: 158.000xg

Time: 15h

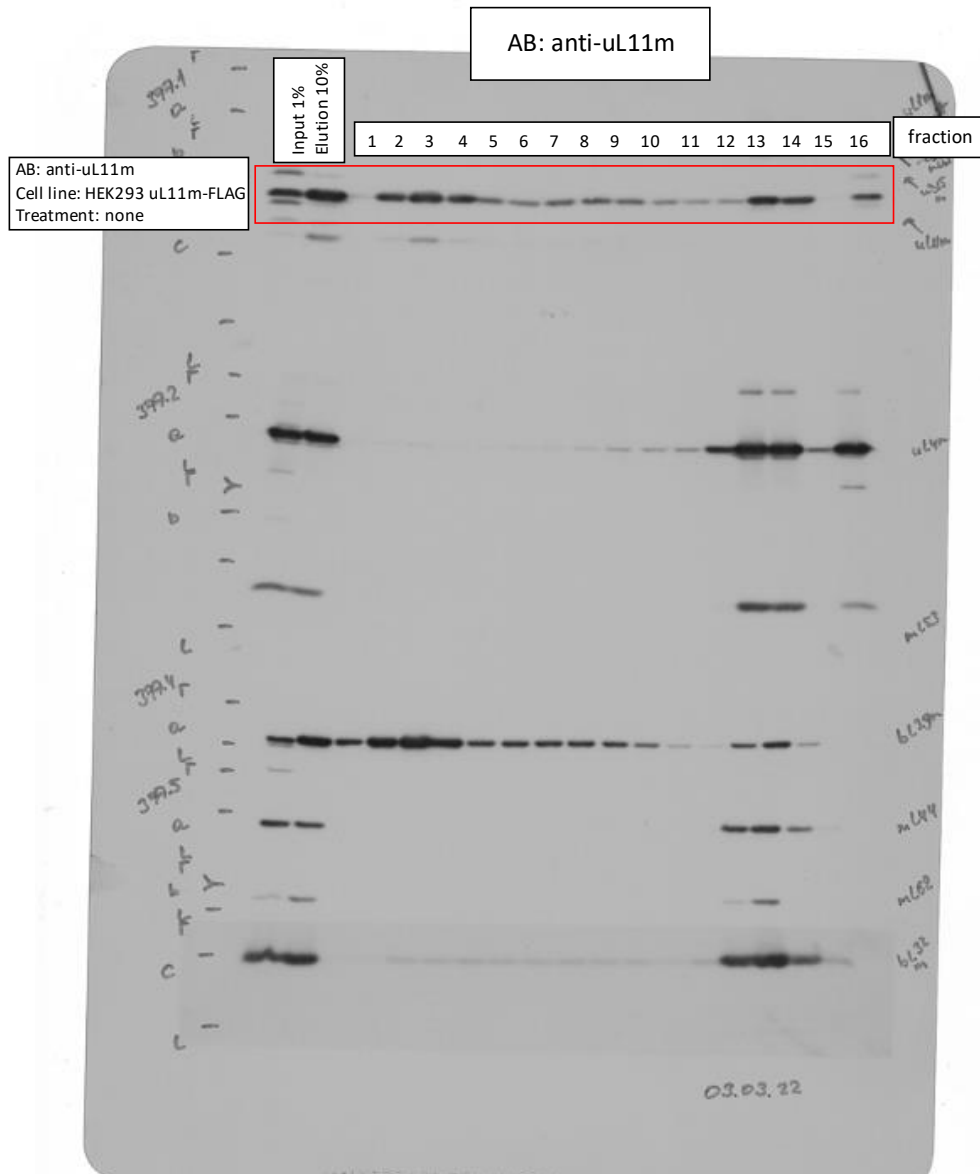

Source Data 4\_related to Extended Data Fig.8a

EL#377.1-3 uL11m-FLAG IP + Gradient

Rotor: SW41 Ti

Gradient: Sucrose 5-30%

Speed: 158.000xg

Time: 15h

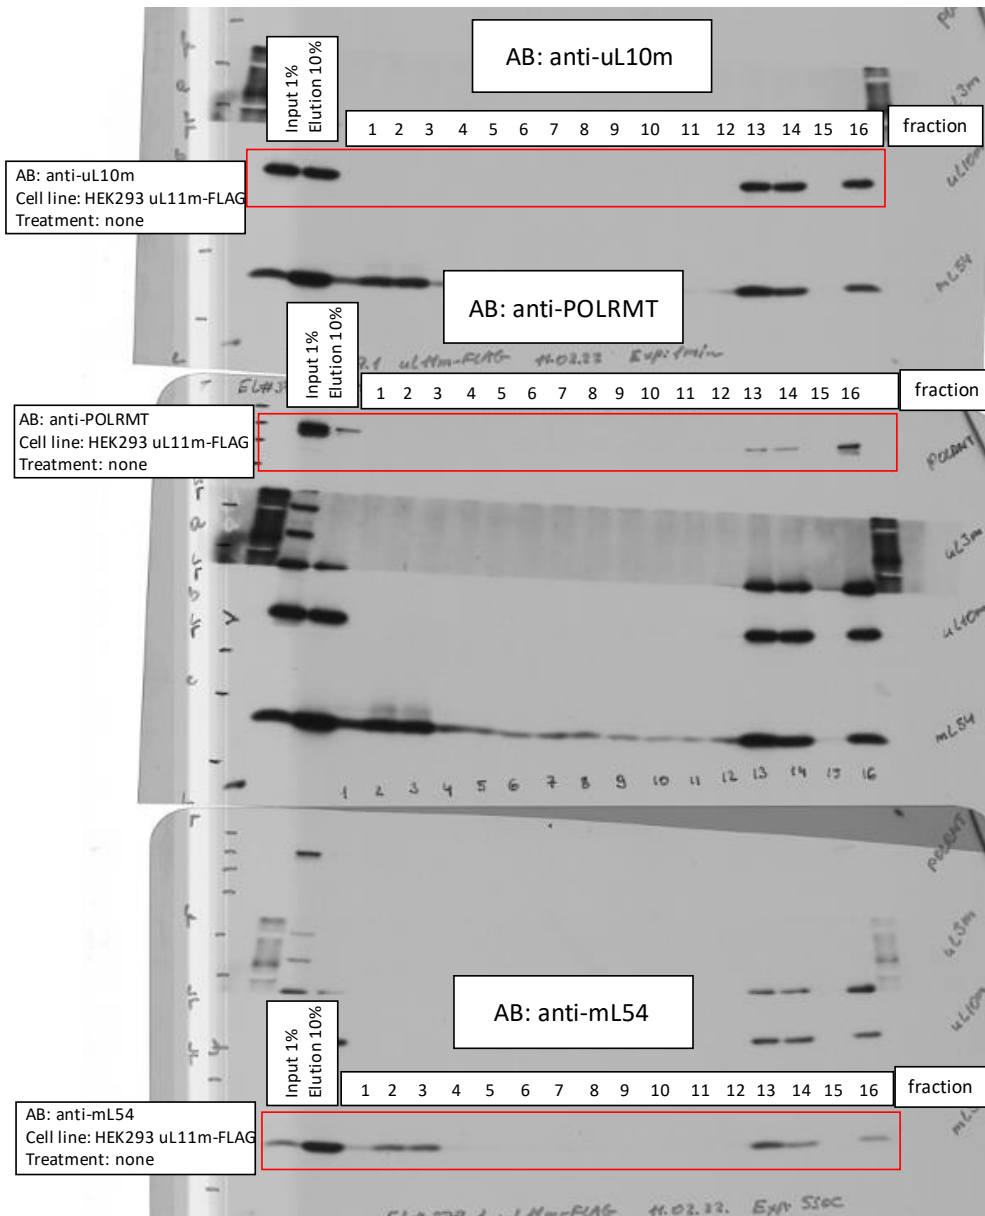

Source Data 4\_related to Extended Data Fig.8a

EL#377.1-3 uL11m-FLAG IP + Gradient

Rotor: SW41 Ti

Gradient: Sucrose 5-30%

Speed: 158.000xg

Time: 15h

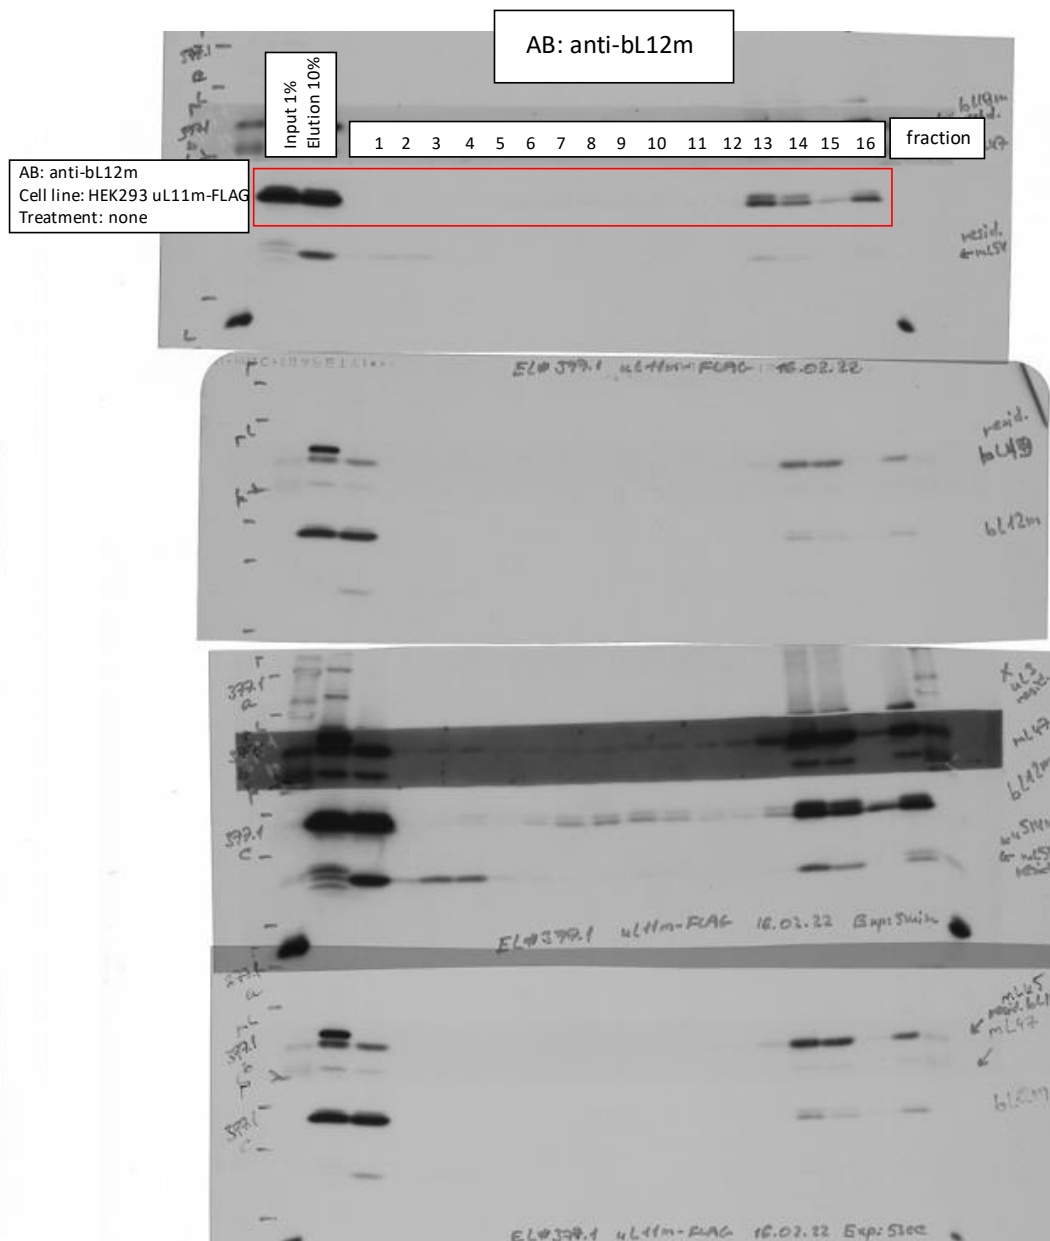

Source Data 4\_related to Extended Data Fig.8a

EL#377.1-3 uL11m-FLAG IP + Gradient

Rotor: SW41 Ti

Gradient: Sucrose 5-30%

Speed: 158.000xg

Time: 15h

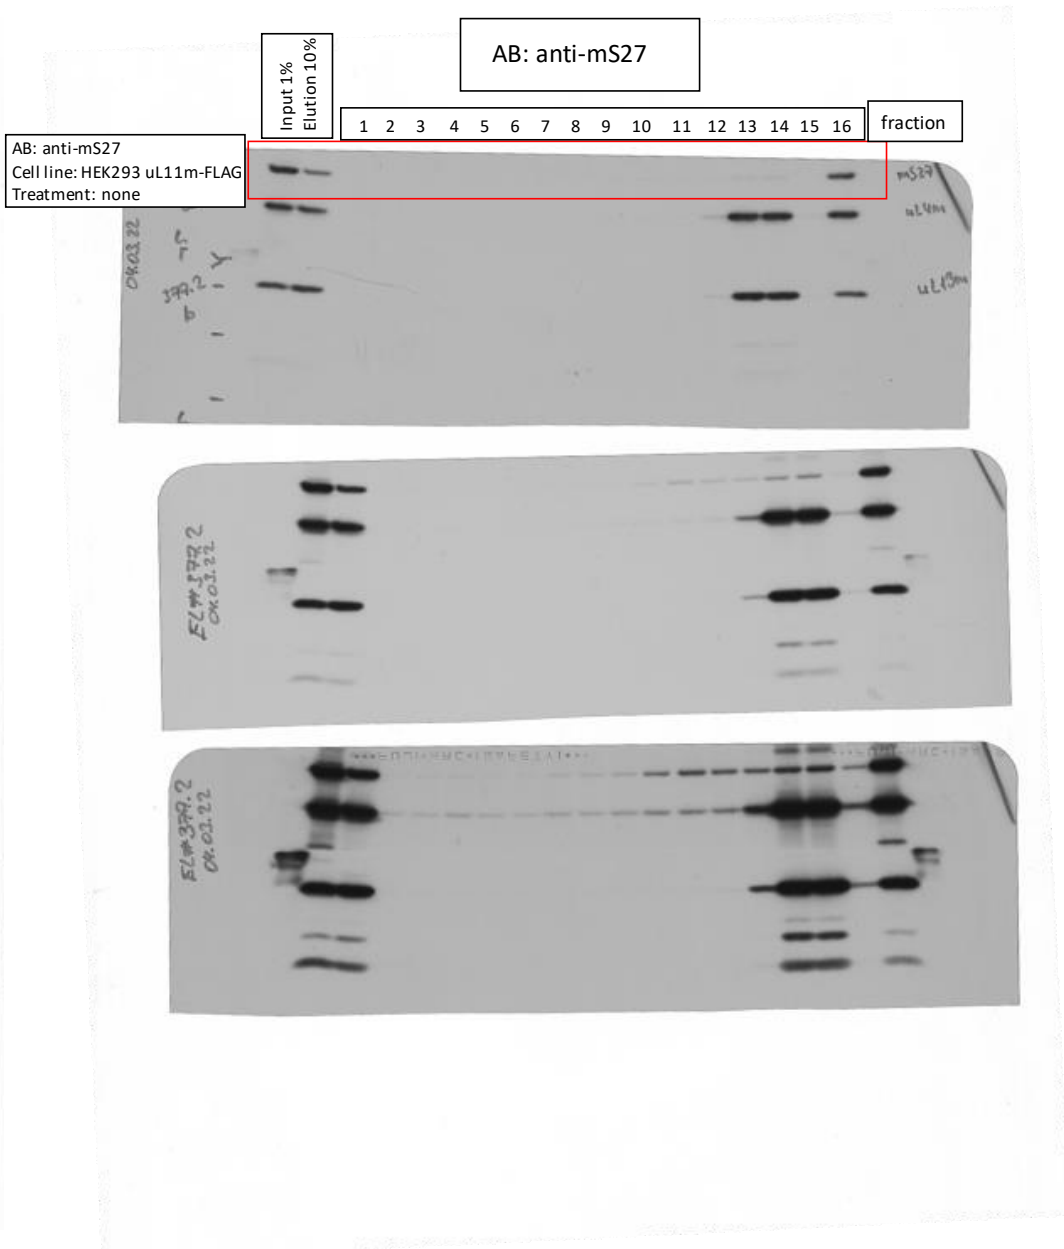

Source Data 4\_related to Extended Data Fig.8a

EL#377.1-3 uL11m-FLAG IP + Gradient

Rotor: SW41 Ti

Gradient: Sucrose 5-30%

Speed: 158.000xg

Time: 15h

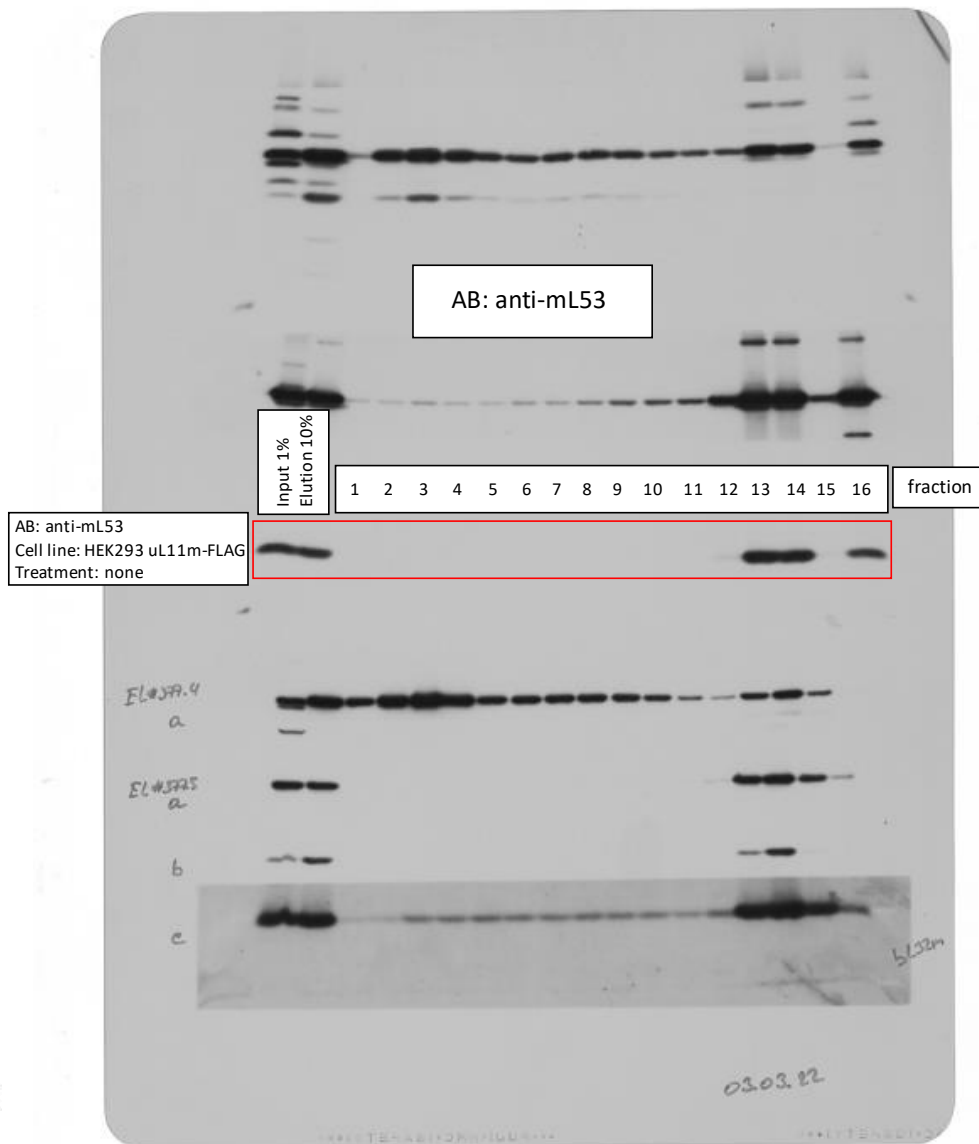

Source Data 4\_related to Extended Data Fig.8a

EL#377.1-3 uL11m-FLAG IP + Gradient

Rotor: SW41 Ti

Gradient: Sucrose 5-30%

Speed: 158.000xg

Time: 15h

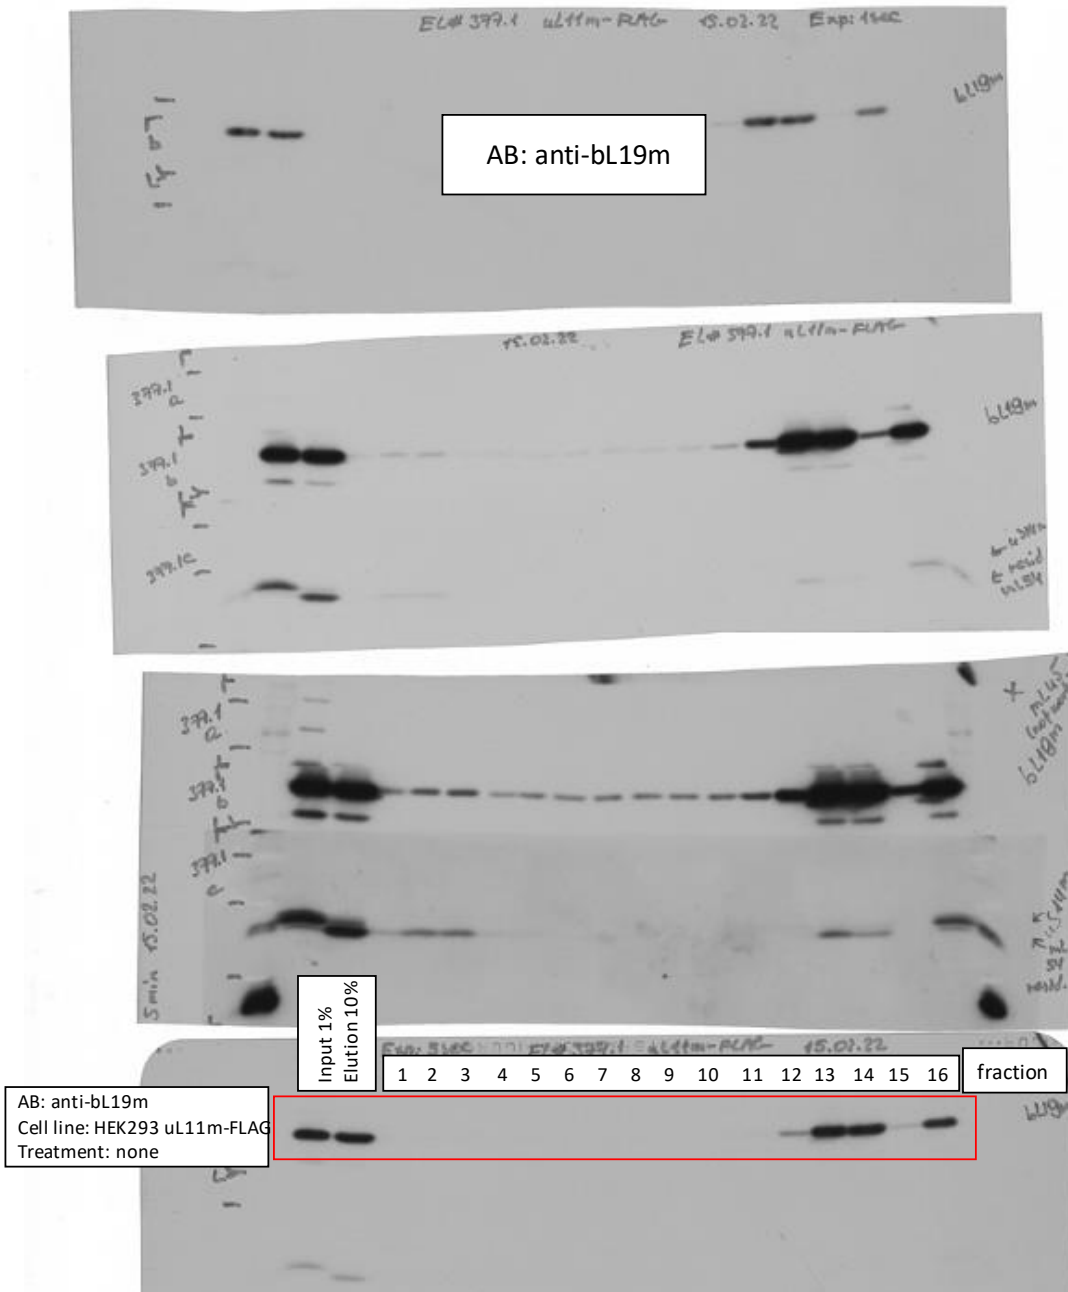

Source Data 4\_related to Extended Data Fig.8b

EL#412.4-6 bL12m-FLAG IP + Gradient

Rotor: SW41 Ti

Gradient: Sucrose 5-30%

Speed: 158.000xg

Time: 15h

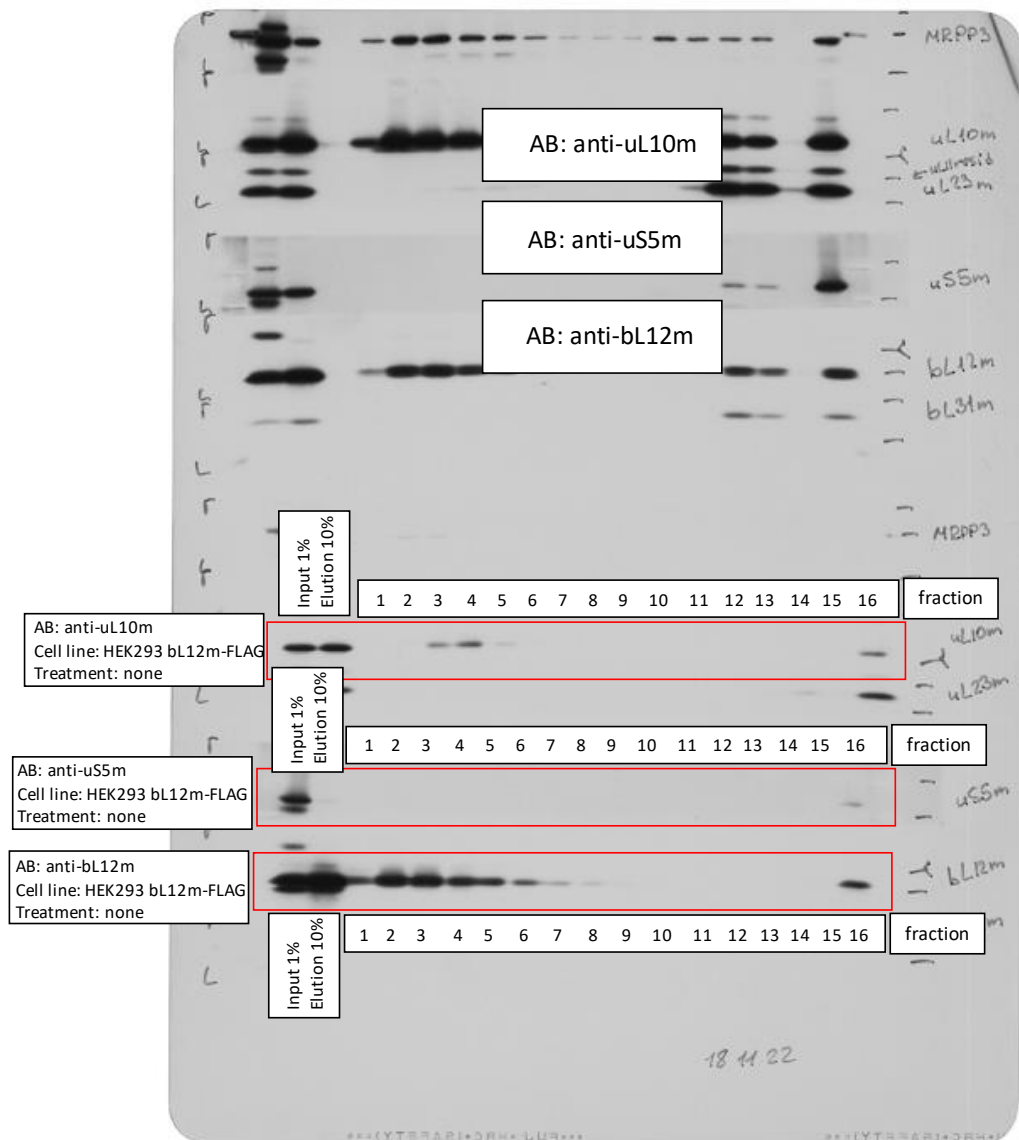

Source Data 4\_related to Extended Data Fig.8b

EL#412.4-6 bL12m-FLAG IP + Gradient

Rotor: SW41 Ti

Gradient: Sucrose 5-30%

Speed: 158.000xg

Time: 15h

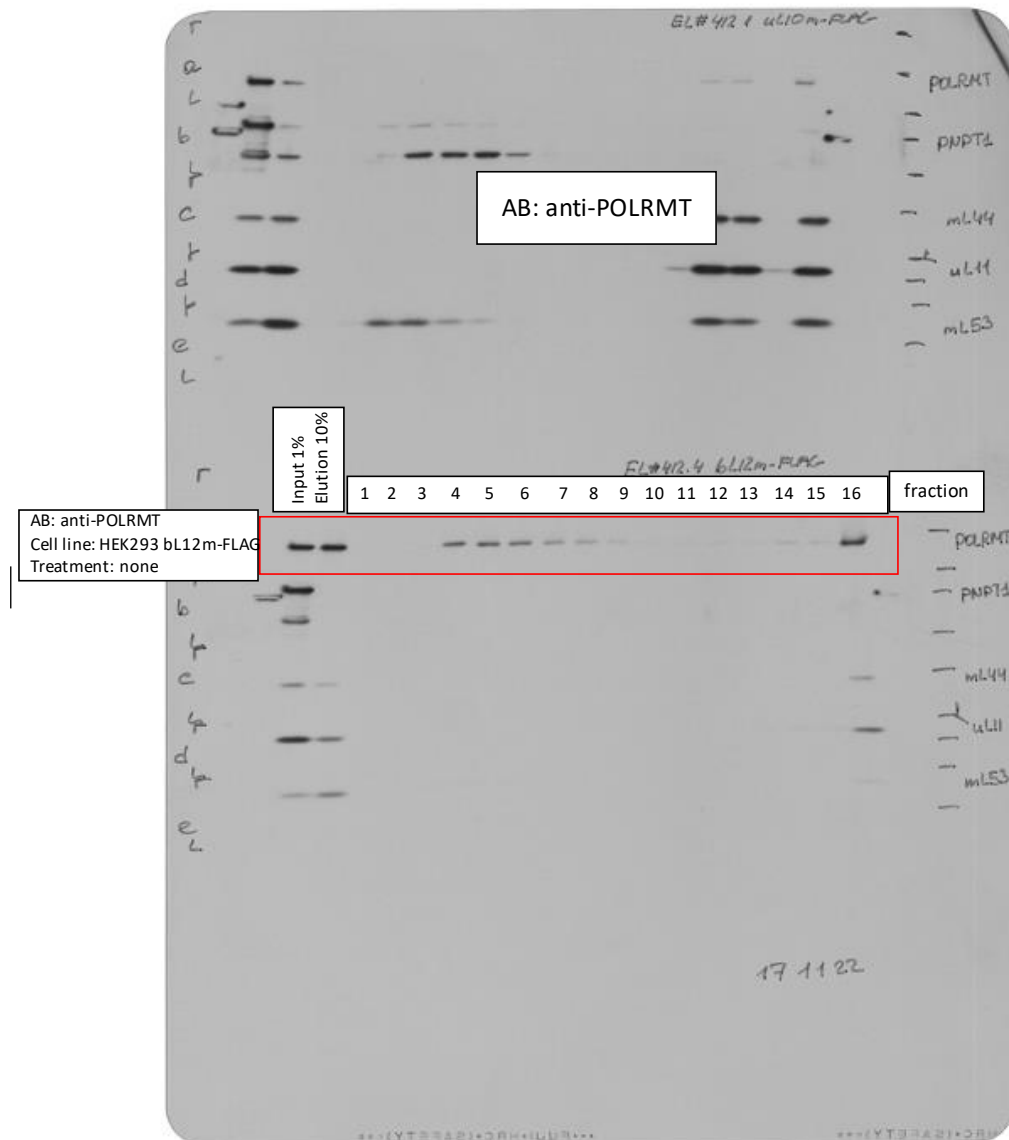



Source Data 4\_related to Extended Data Fig.8b

EL#412.4-6 bL12m-FLAG IP + Gradient

Rotor: SW41 Ti

Gradient: Sucrose 5-30%

Speed: 158.000xg

Time: 15h

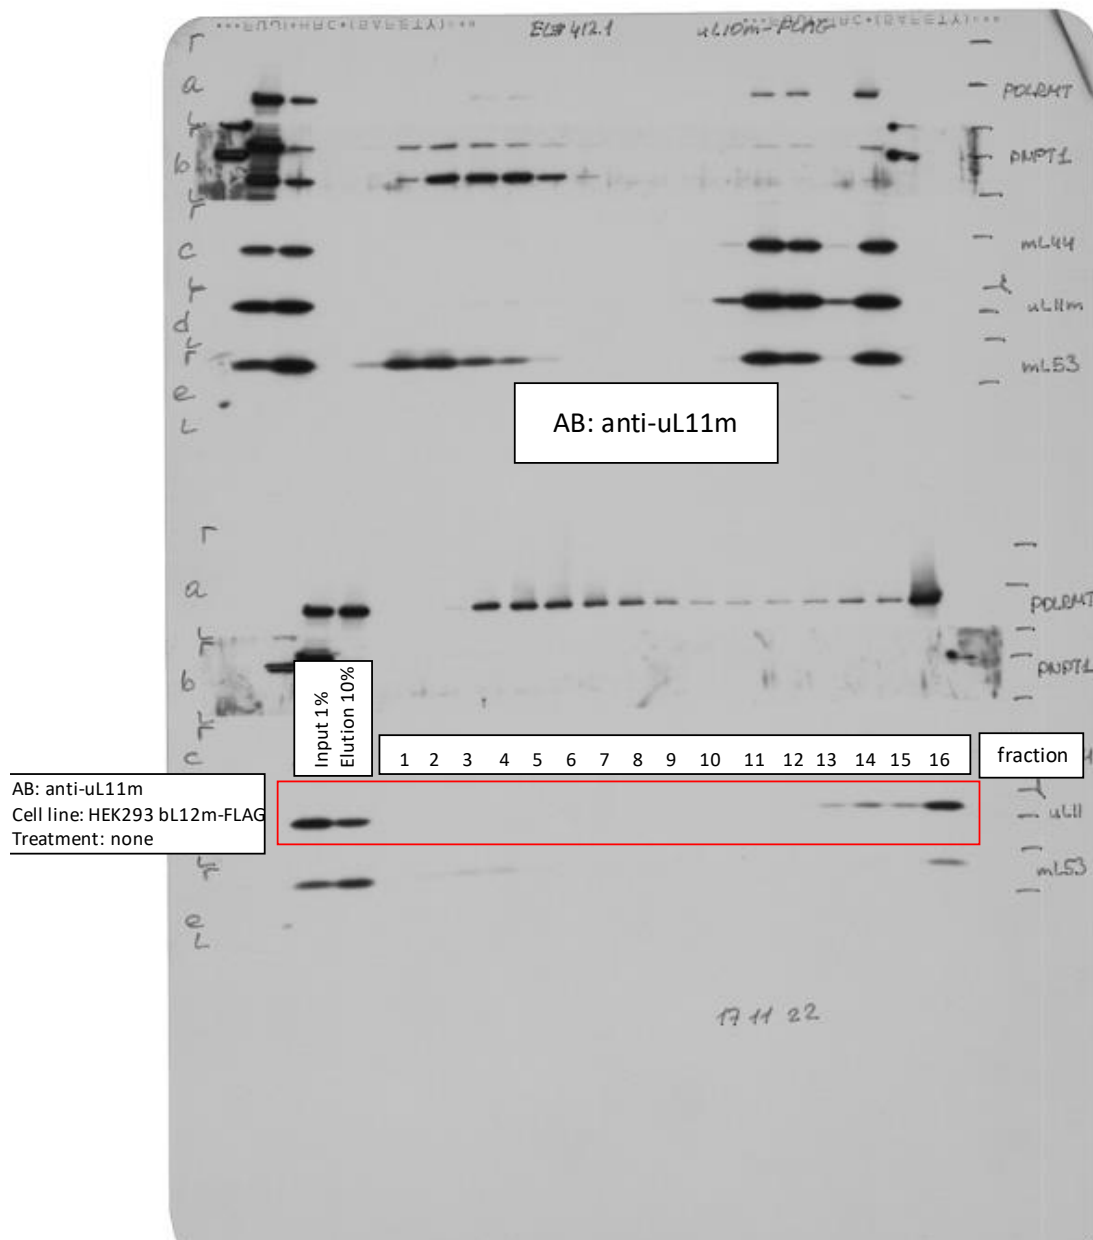

Source Data 4\_related to Extended Data Fig.8b

EL#412.4-6 bL12m-FLAG IP + Gradient

Rotor: SW41 Ti

Gradient: Sucrose 5-30%

Speed: 158.000xg

Time: 15h

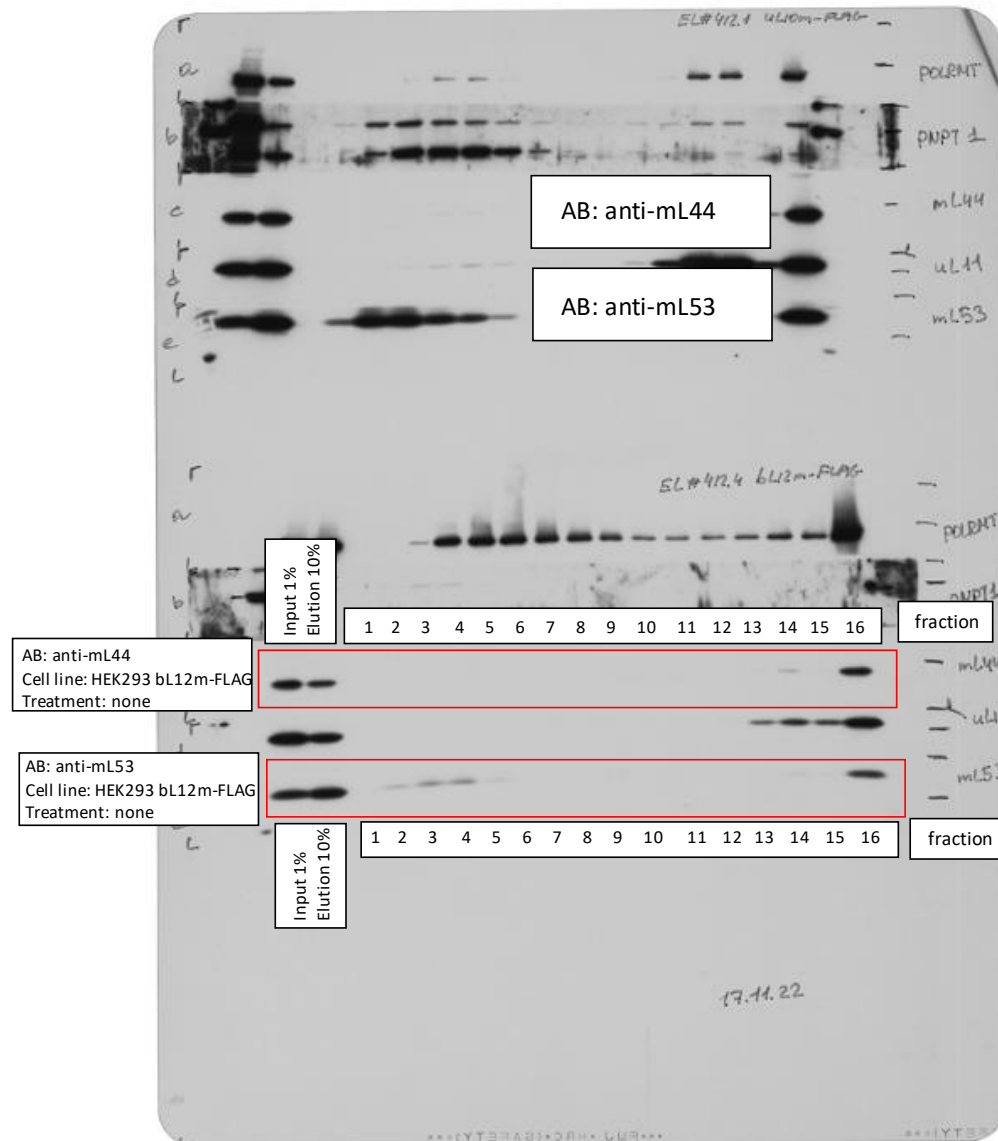

Source Data 4\_related to Extended Data Fig.8b

EL#412.4-6 bL12m-FLAG IP + Gradient

Rotor: SW41 Ti

Gradient: Sucrose 5-30%

Speed: 158.000xg

Time: 15h

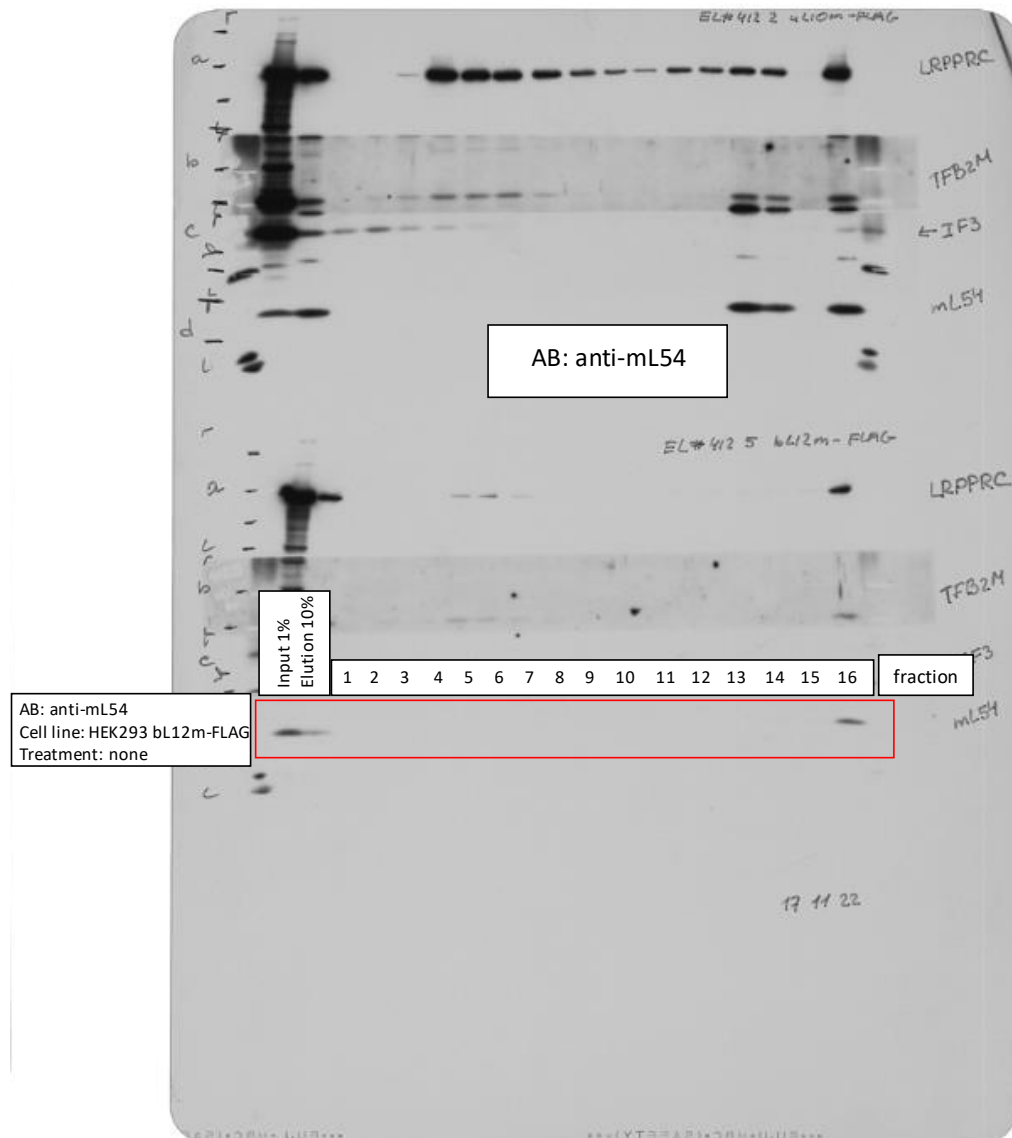

AB: anti-mL54  
Cell line: HEK293 bL12m-FLAG  
Treatment: none

Source Data 4\_related to Extended Data Fig.8c

EL#412.1-3 uL10m-FLAG IP + Gradient

Rotor: SW41 Ti

Gradient: Sucrose 5-30%

Speed: 158.000xg

Time: 15h

AB: anti-uL10m

AB: anti-uS5m

AB: anti-bL12m

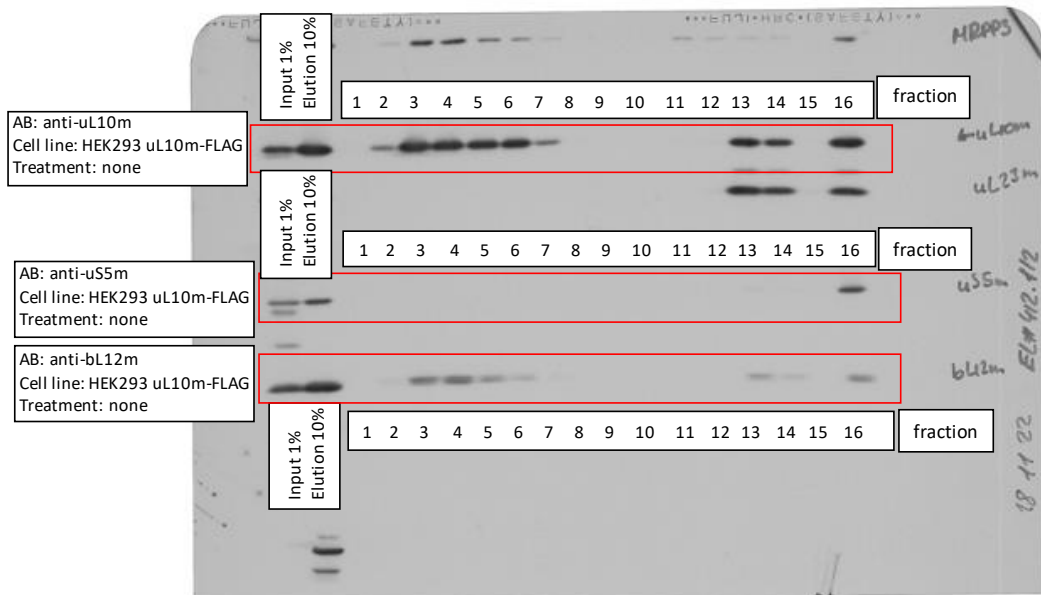

Source Data 4\_related to Extended Data Fig.8c

EL#412.1-3 uL10m-FLAG IP + Gradient

Rotor: SW41 Ti

Gradient: Sucrose 5-30%

Speed: 158.000xg

Time: 15h

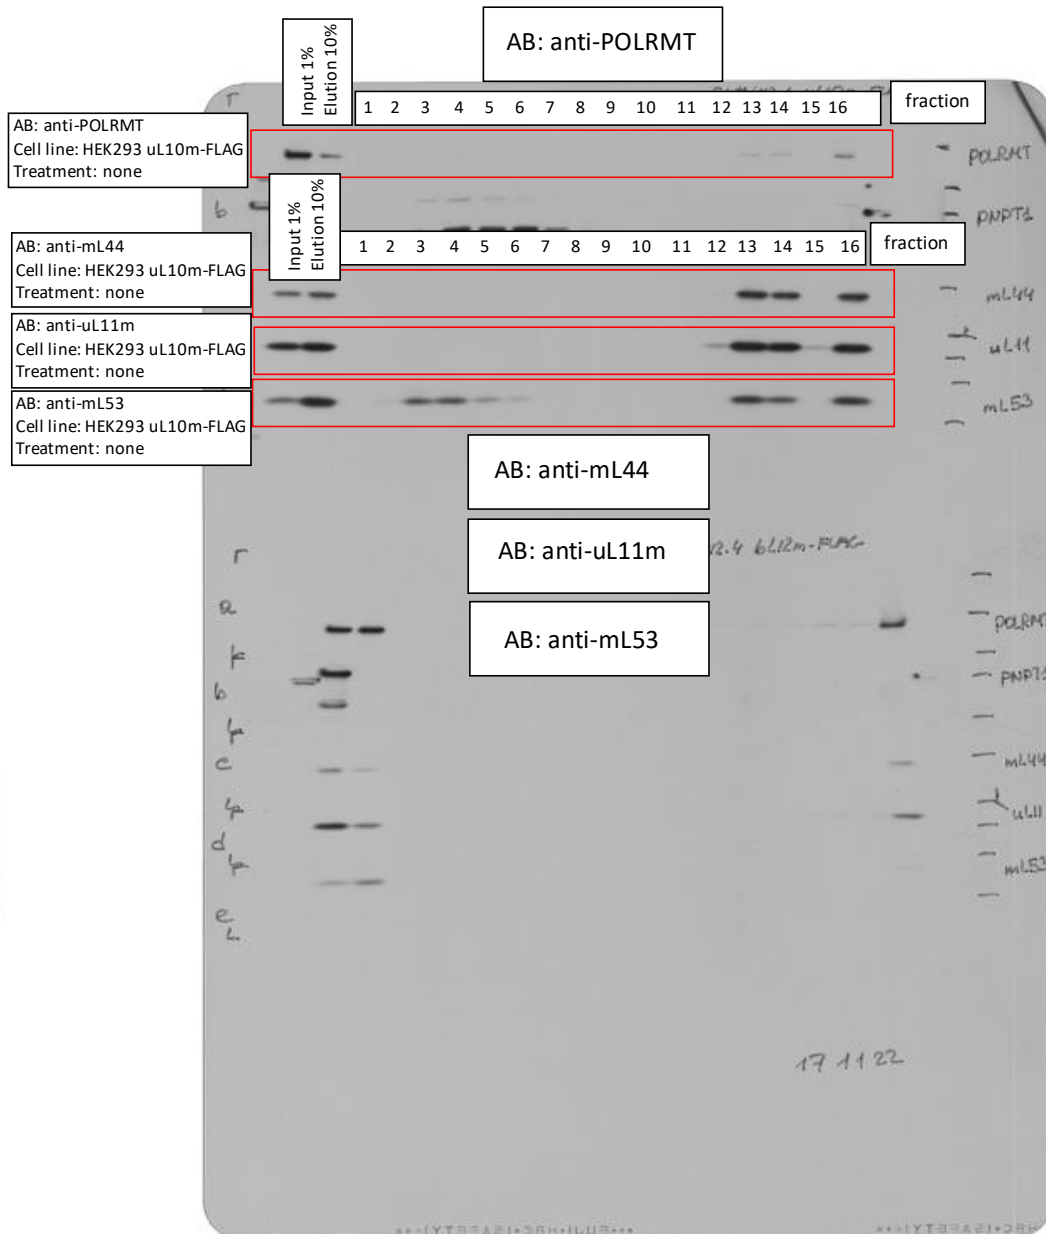

Source Data 4\_related to Extended Data Fig.8c

EL#412.1-3 uL10m-FLAG IP + Gradient

Rotor: SW41 Ti

Gradient: Sucrose 5-30%

Speed: 158.000xg

Time: 15h

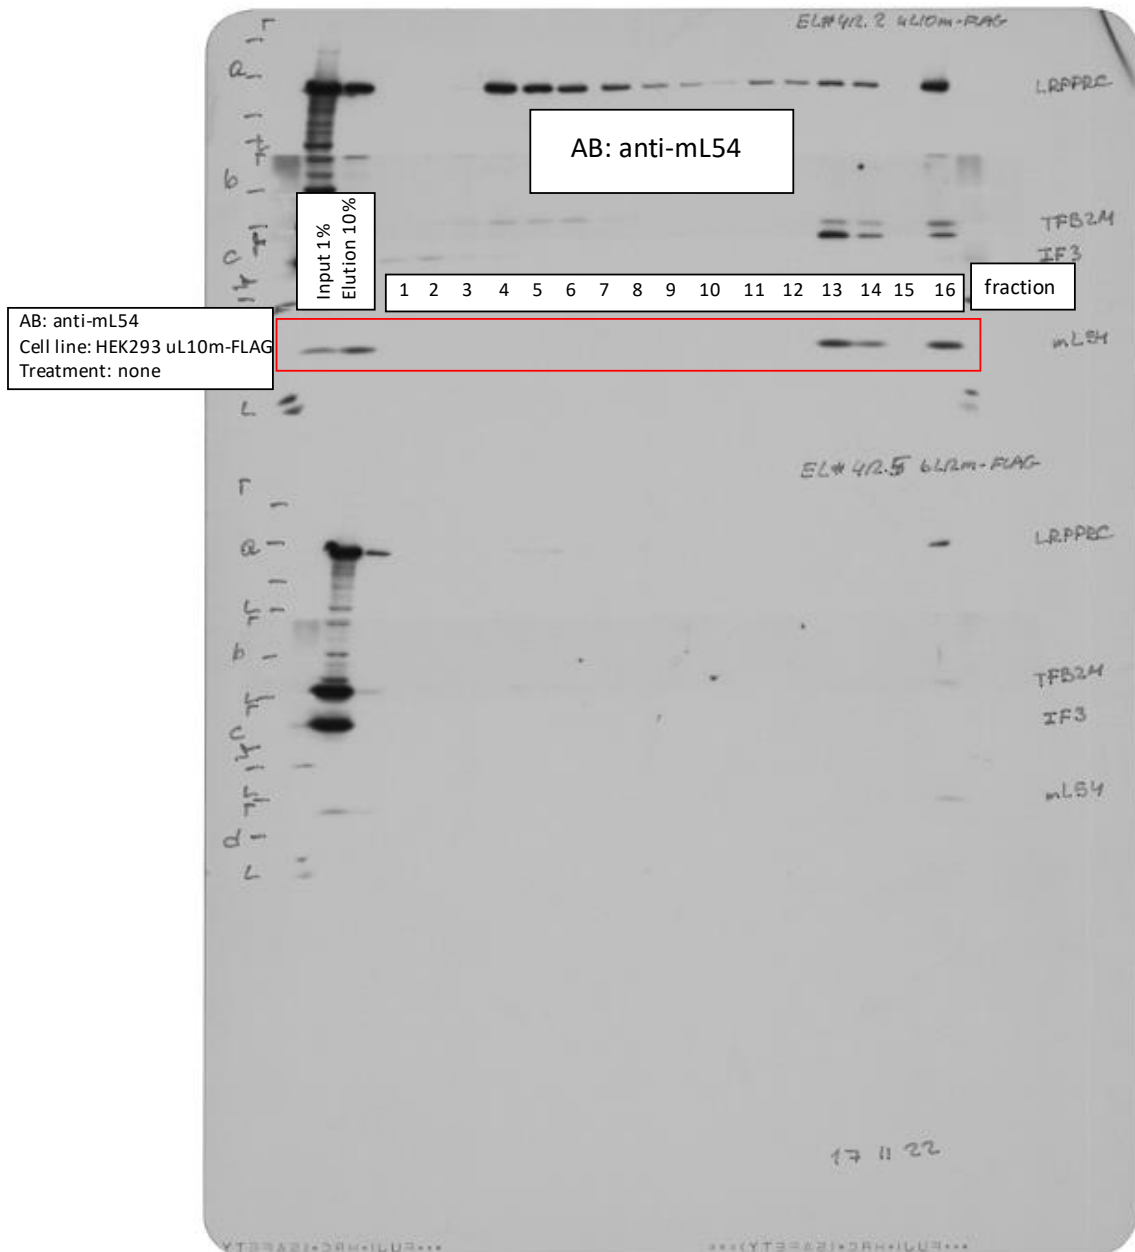

Source Data 4\_related to Extended Data Fig.8e

EL#451 uL11m-FLAG IP + EtBr treatment

Rotor: N/A

Gradient: N/A

Speed: N/A

Time: N/A

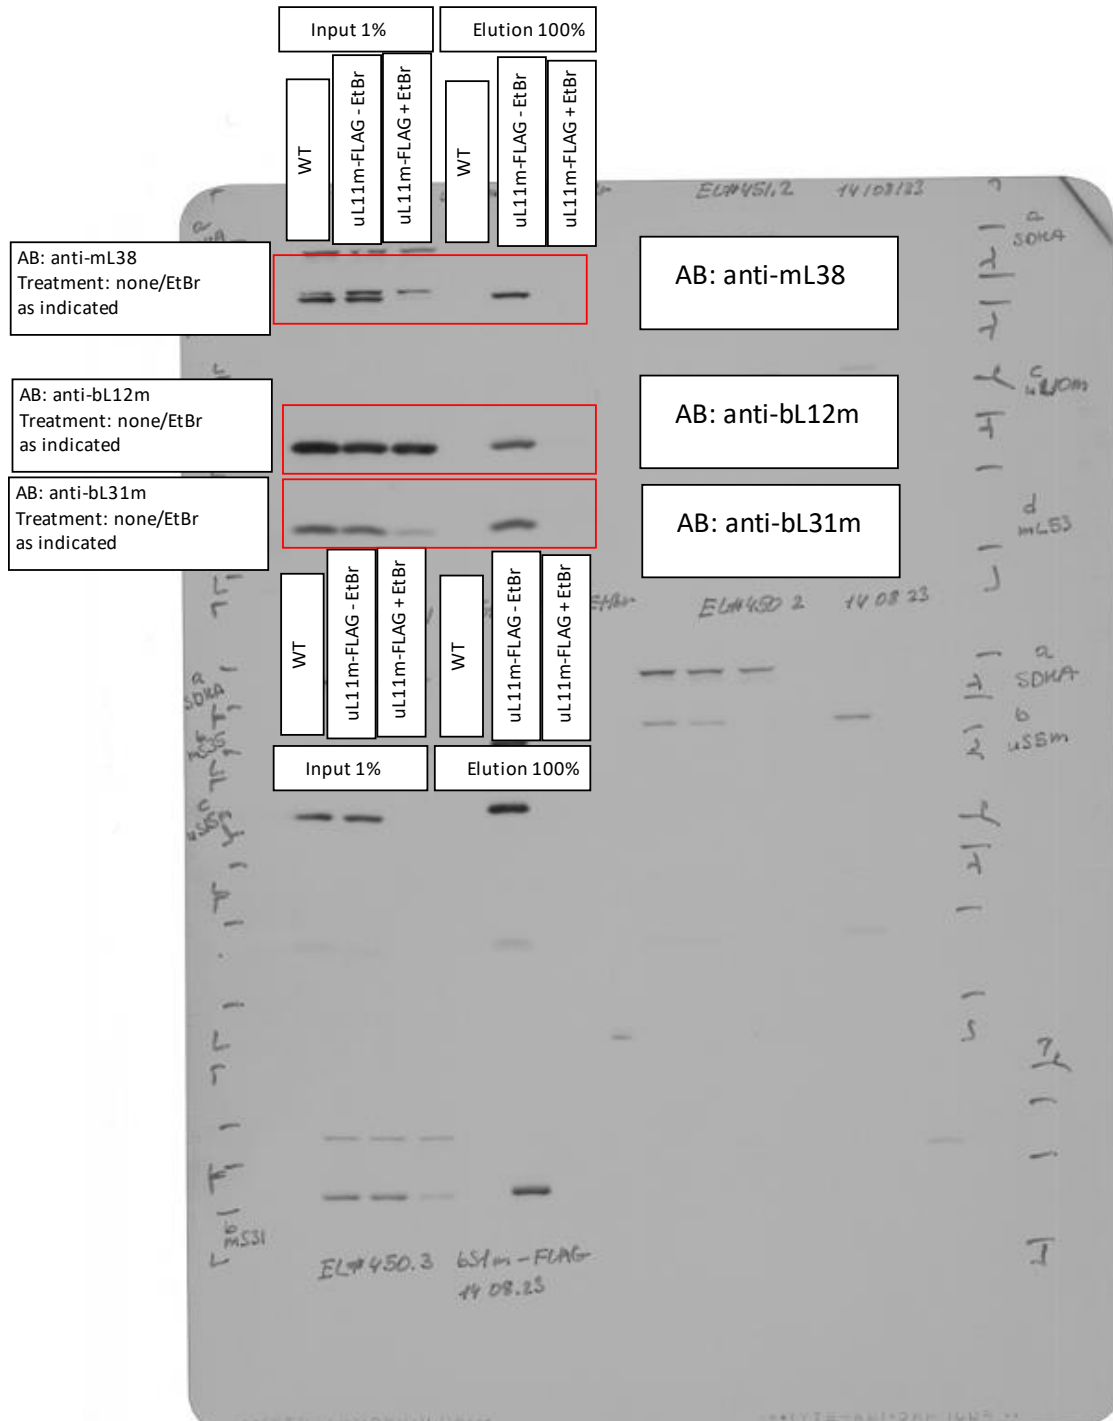

Source Data 4\_related to Extended Data Fig.8e

EL#451 uL11m-FLAG IP + EtBr treatment

Rotor: N/A

Gradient: N/A

Speed: N/A

Time: N/A

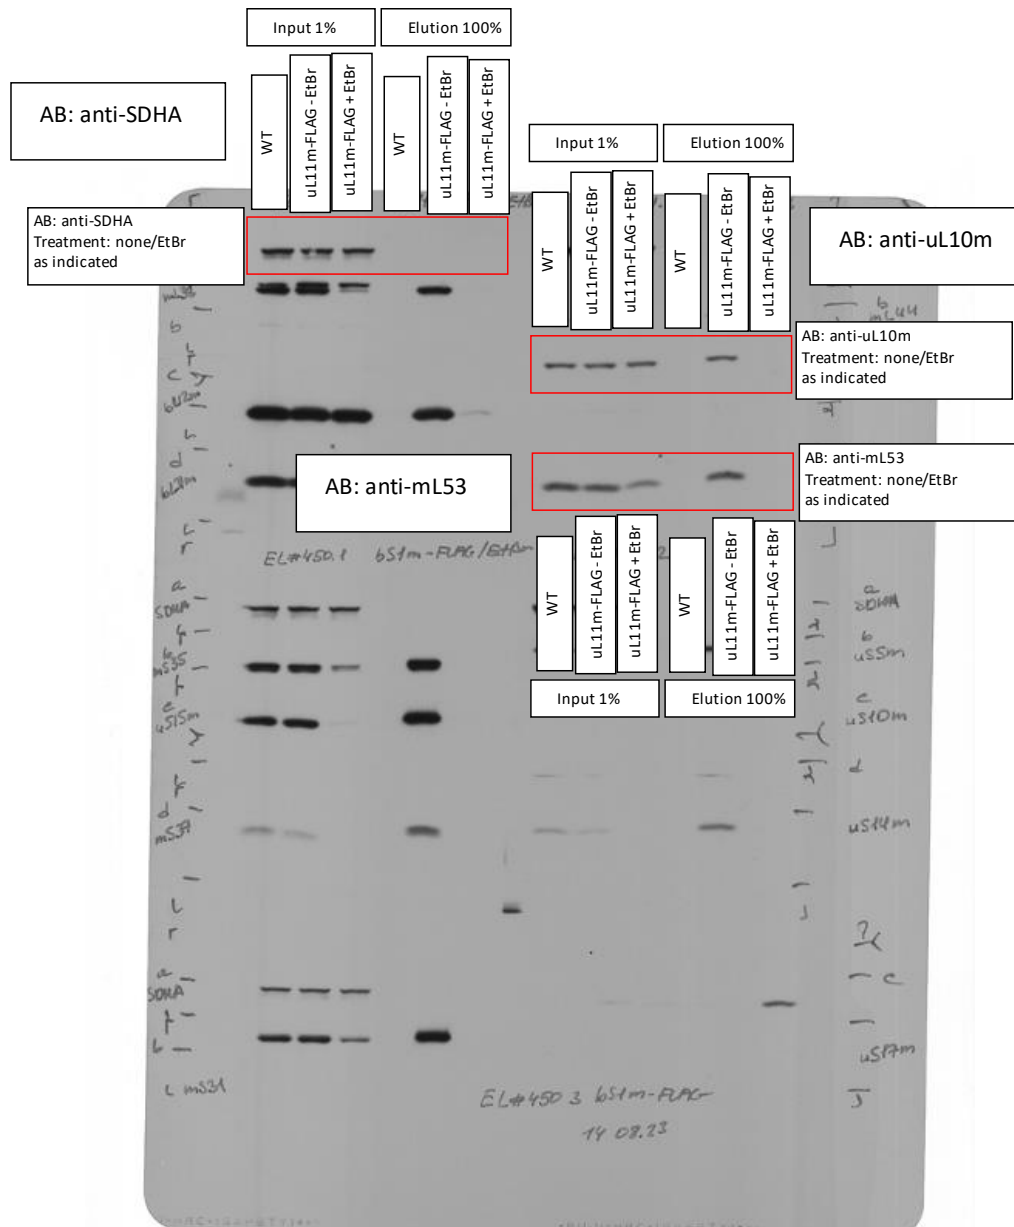



Source Data 4\_related to Extended Data Fig.8e

EL#451 uL11m-FLAG IP + EtBr treatment

Rotor: N/A

Gradient: N/A

Speed: N/A

Time: N/A

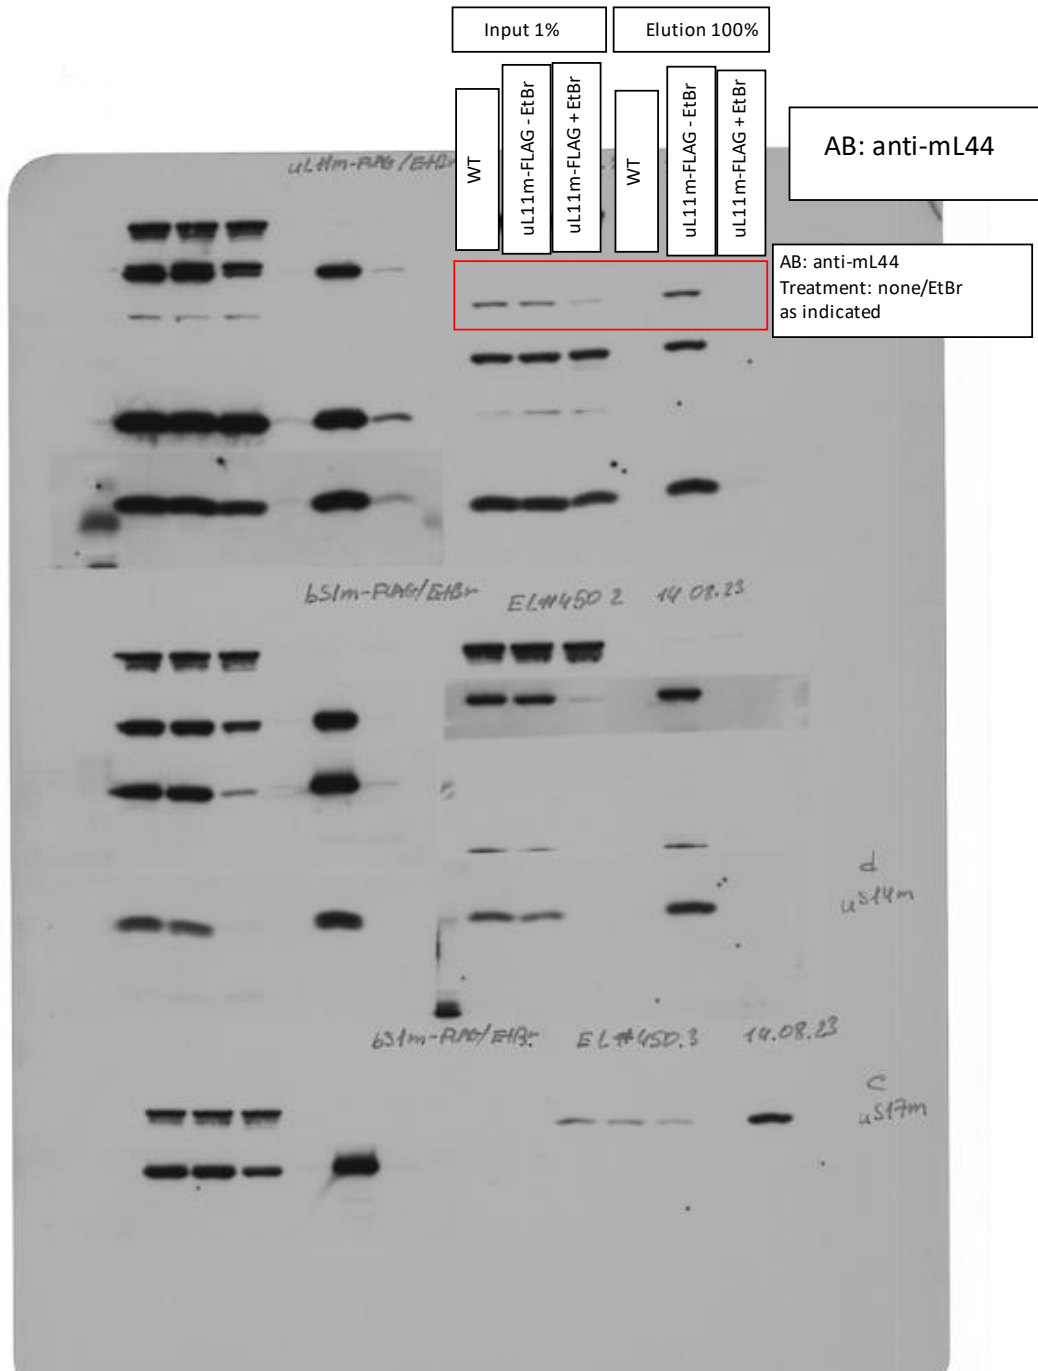

Source Data 4\_related to Extended Data Fig.8e

EL#451 uL11m-FLAG IP + EtBr treatment

Rotor: N/A

Gradient: N/A

Speed: N/A

Time: N/A

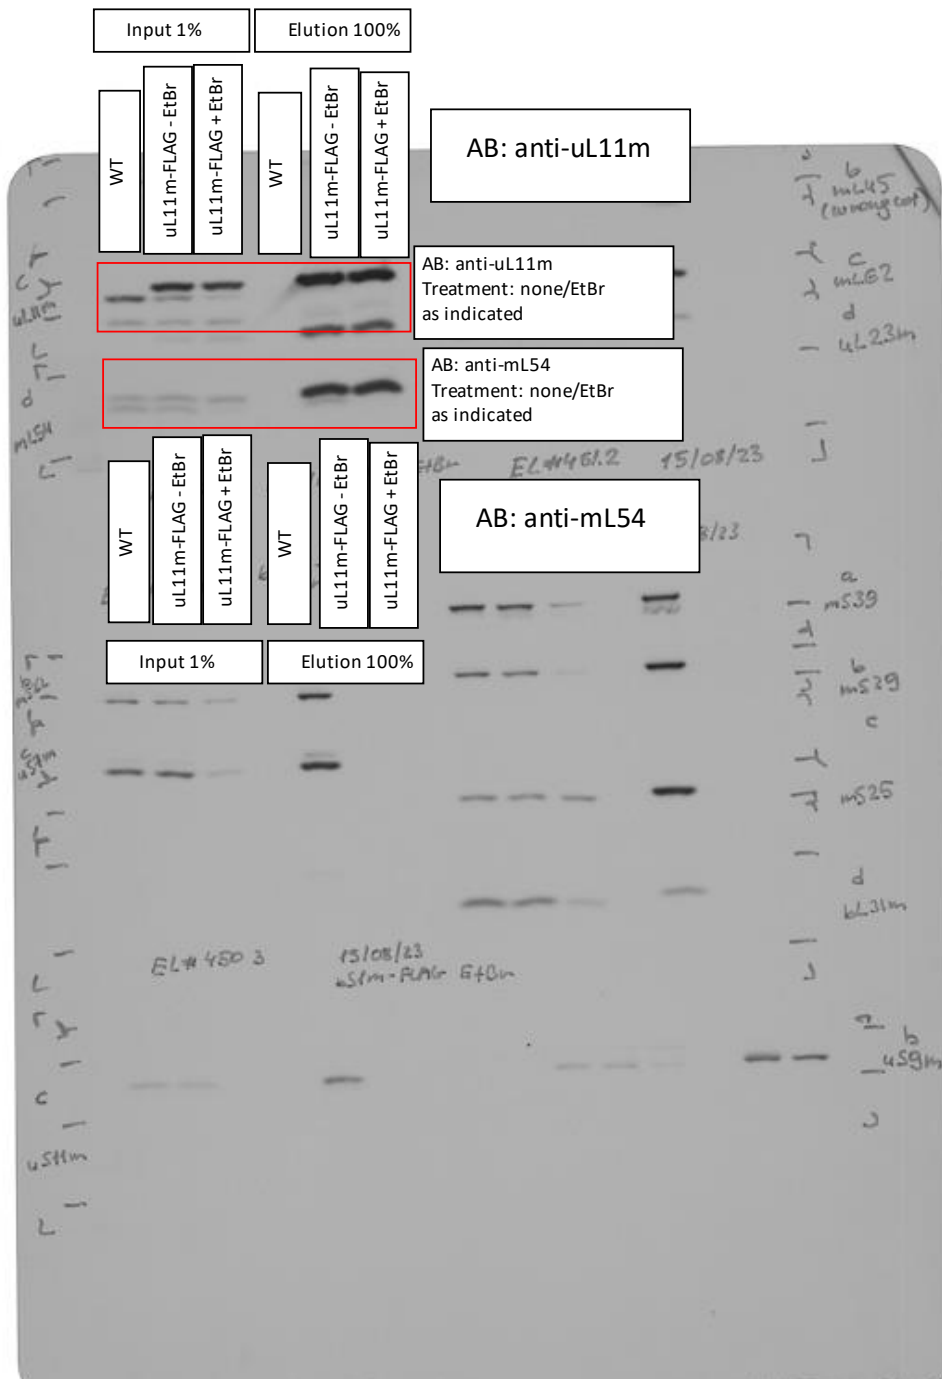

Source Data 4\_related to Extended Data Fig.8e

EL#451 uL11m-FLAG IP + EtBr treatment

Rotor: N/A

Gradient: N/A

Speed: N/A

Time: N/A

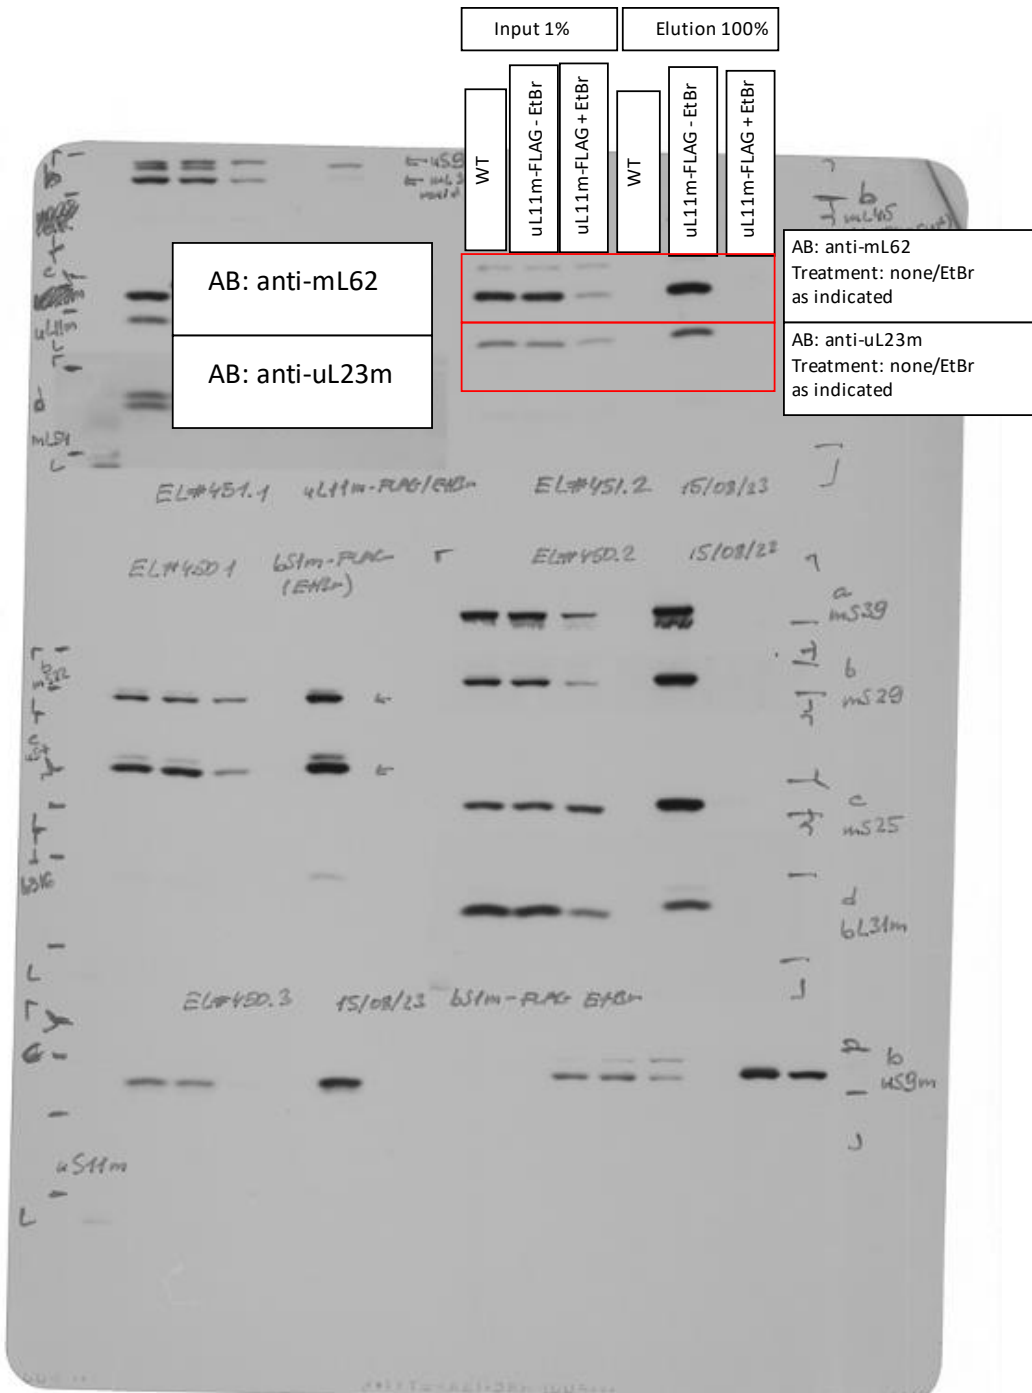

### Source Data 4\_related to Extended Data Fig.8e

EL#451 uL11m-FLAG IP + EtBr treatment

Rotor: N/A

Gradient: N/A

Speed: N/A

Time: N/A

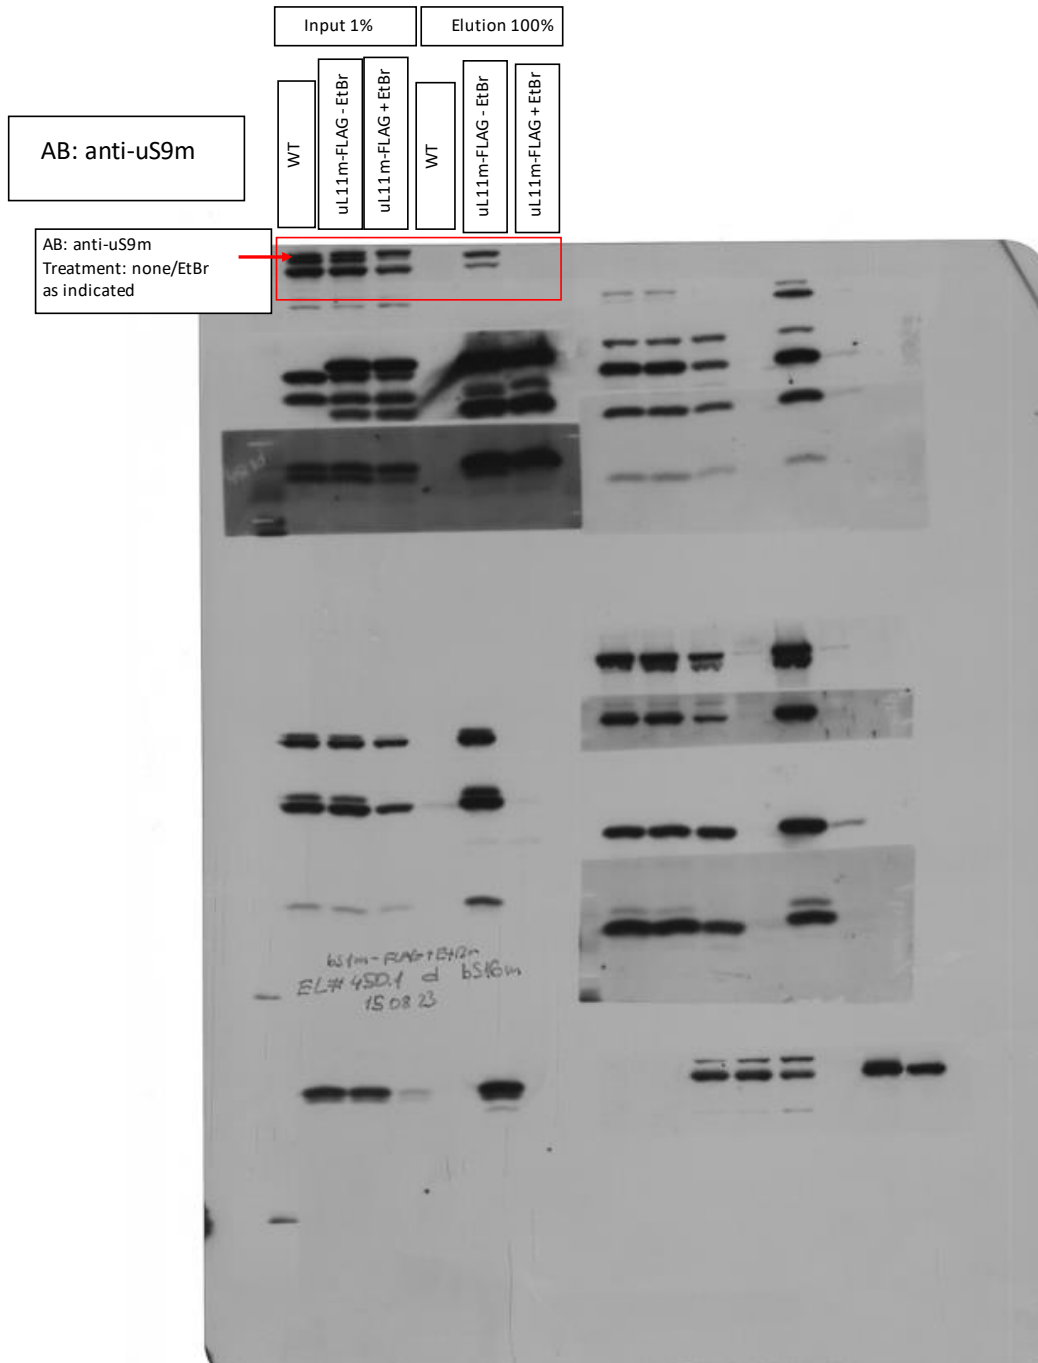

Source Data 4\_related to Extended Data Fig.8d  
 EL#446/MH#200 bL12m-FLAG IP + EtBr treatment  
 Rotor: N/A  
 Gradient: N/A  
 Speed: N/A  
 Time: N/A

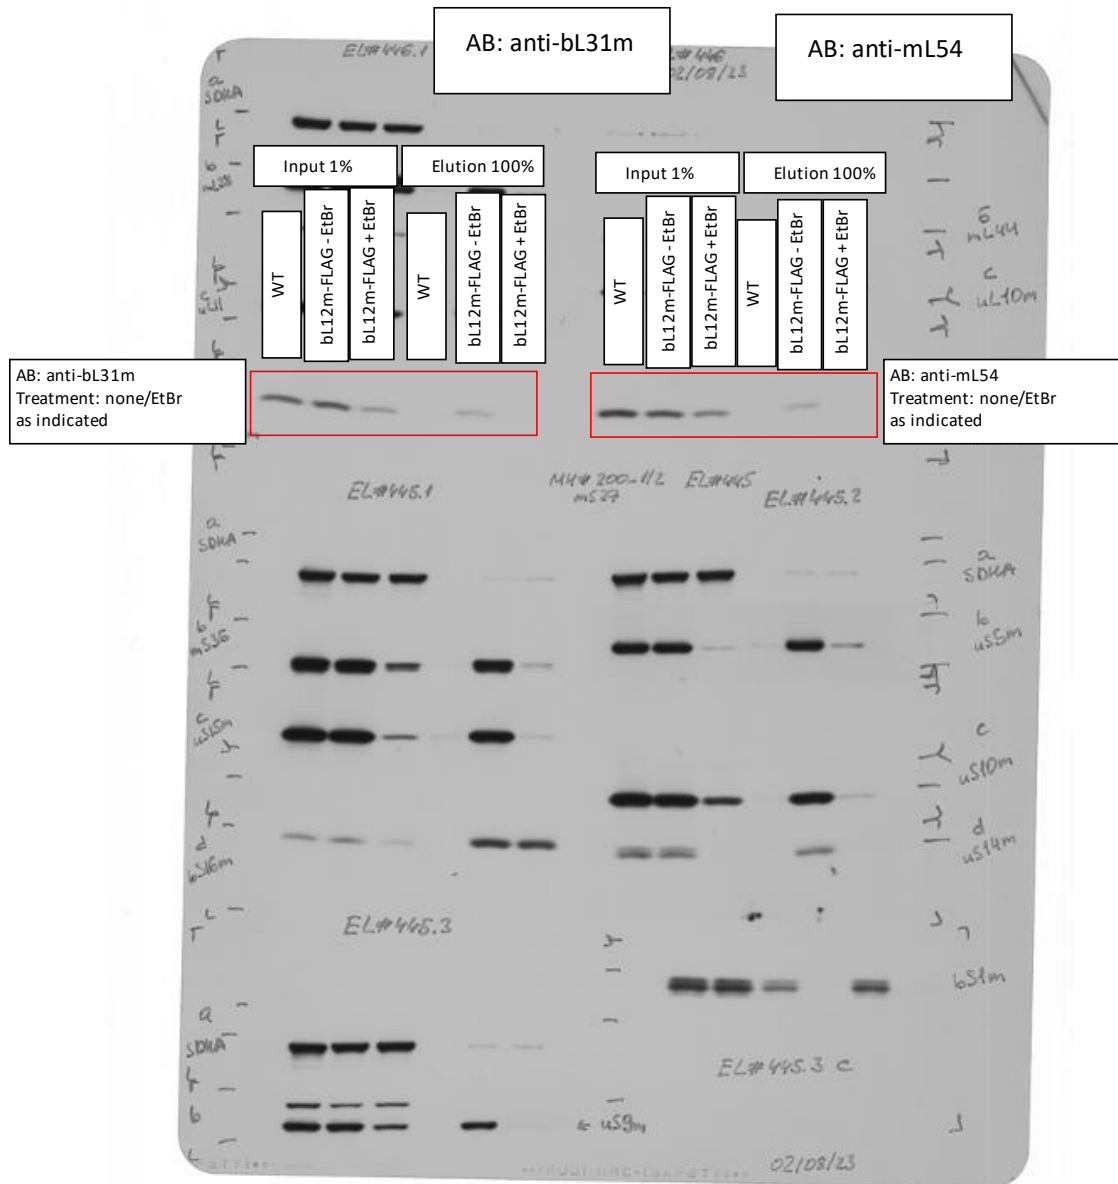

Source Data 4\_related to Extended Data Fig.8d  
 EL#446/MH#200 bL12m-FLAG IP + EtBr treatment

Rotor: N/A  
 Gradient: N/A  
 Speed: N/A  
 Time: N/A

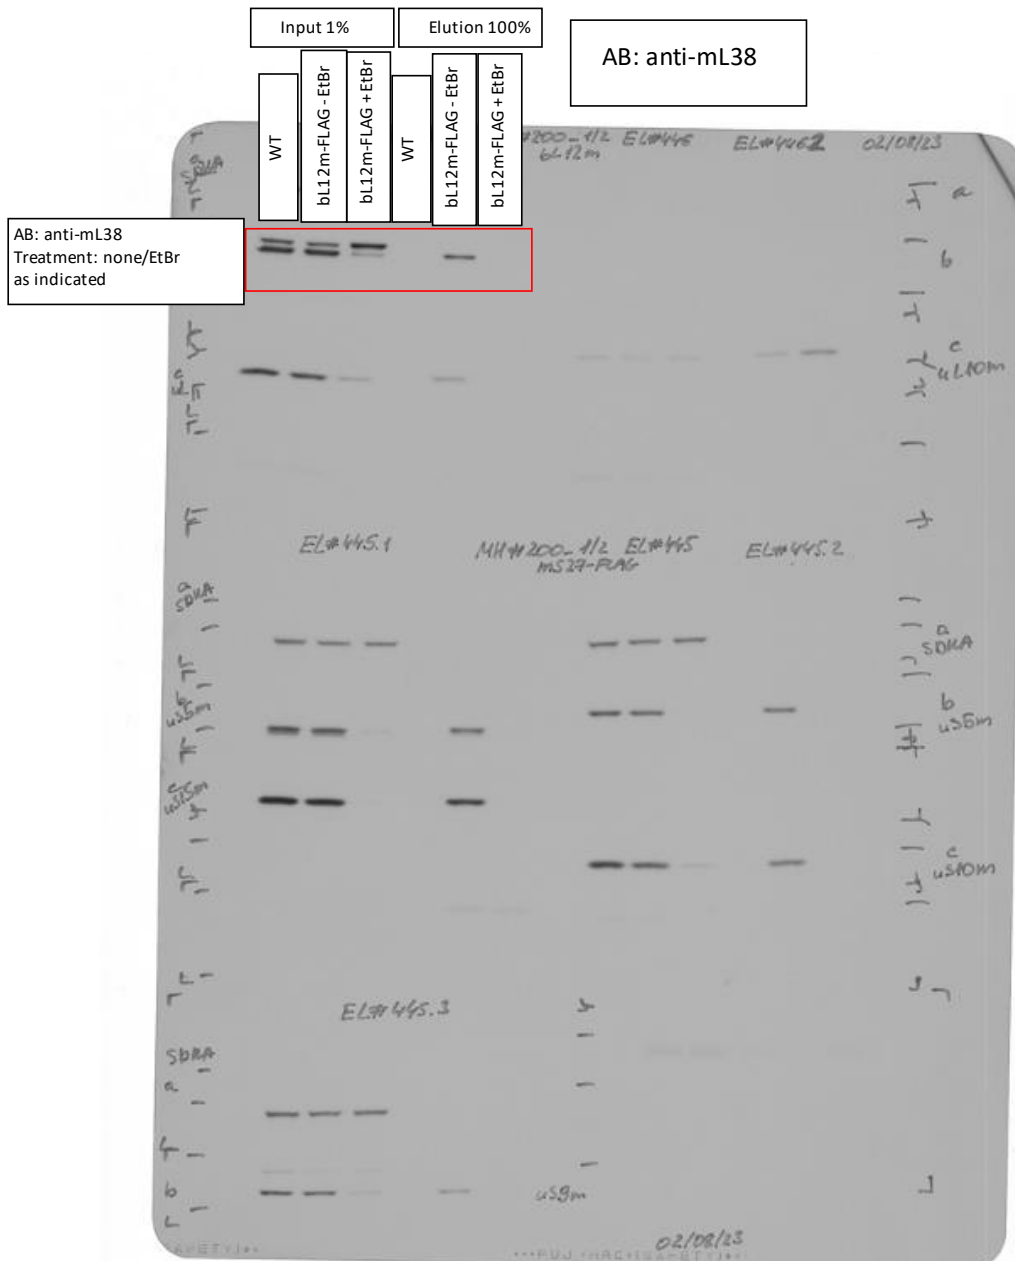

Source Data 4\_related to Extended Data Fig.8d  
 EL#446/MH#200 bL12m-FLAG IP + EtBr treatment

Rotor: N/A

Gradient: N/A

Speed: N/A

Time: N/A

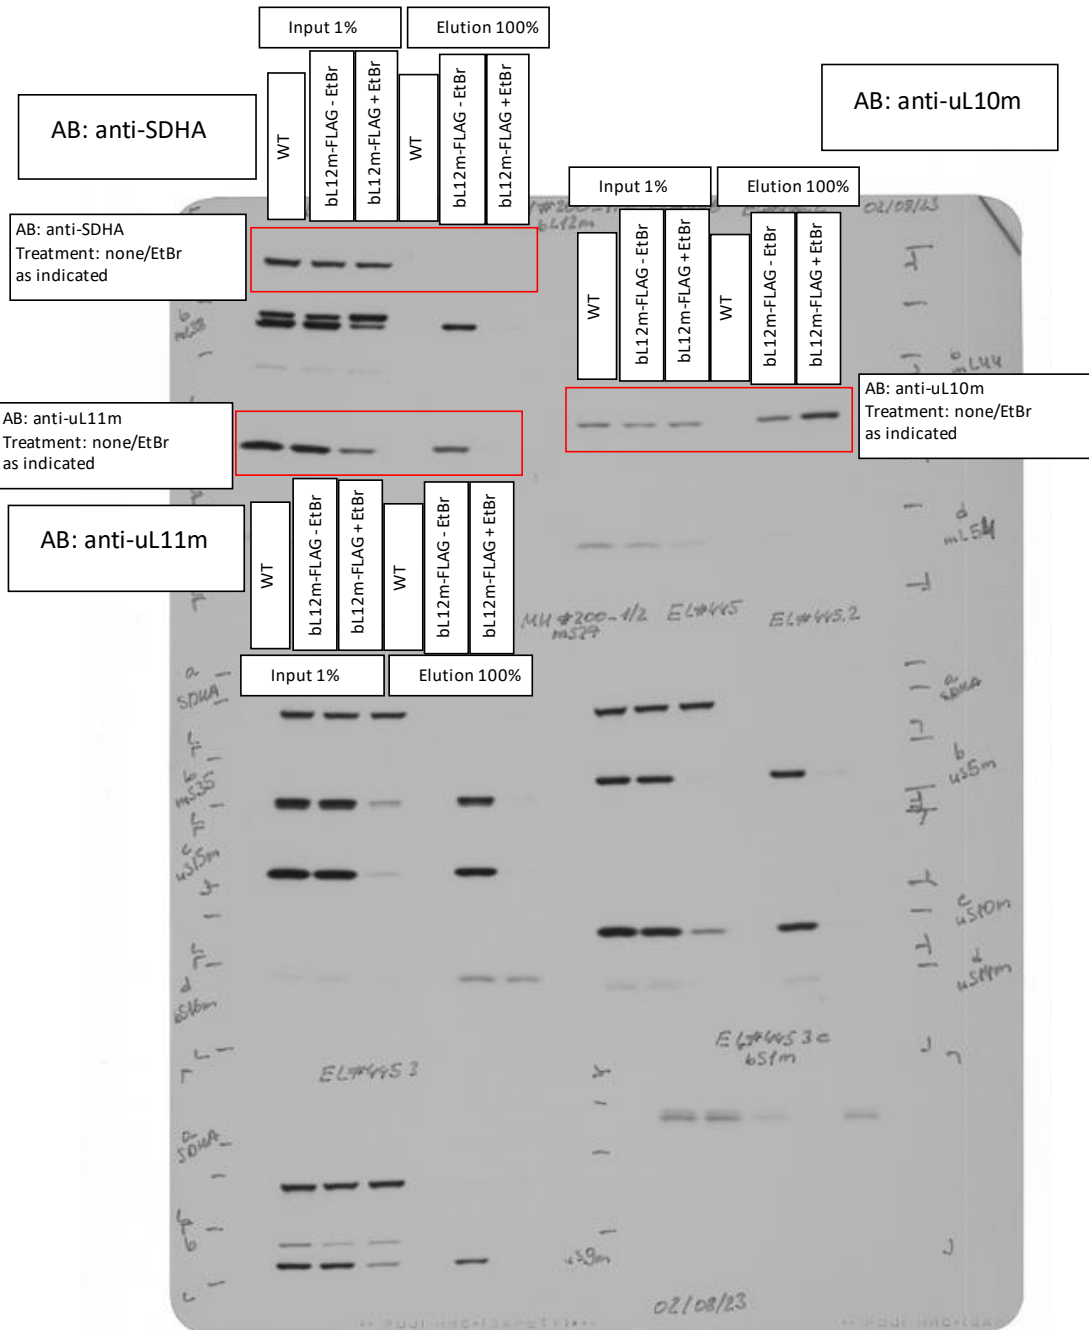

Source Data 4\_related to Extended Data Fig.8d  
EL#446/MH#200 bL12m-FLAG IP + EtBr treatment

Rotor: N/A  
Gradient: N/A  
Speed: N/A  
Time: N/A

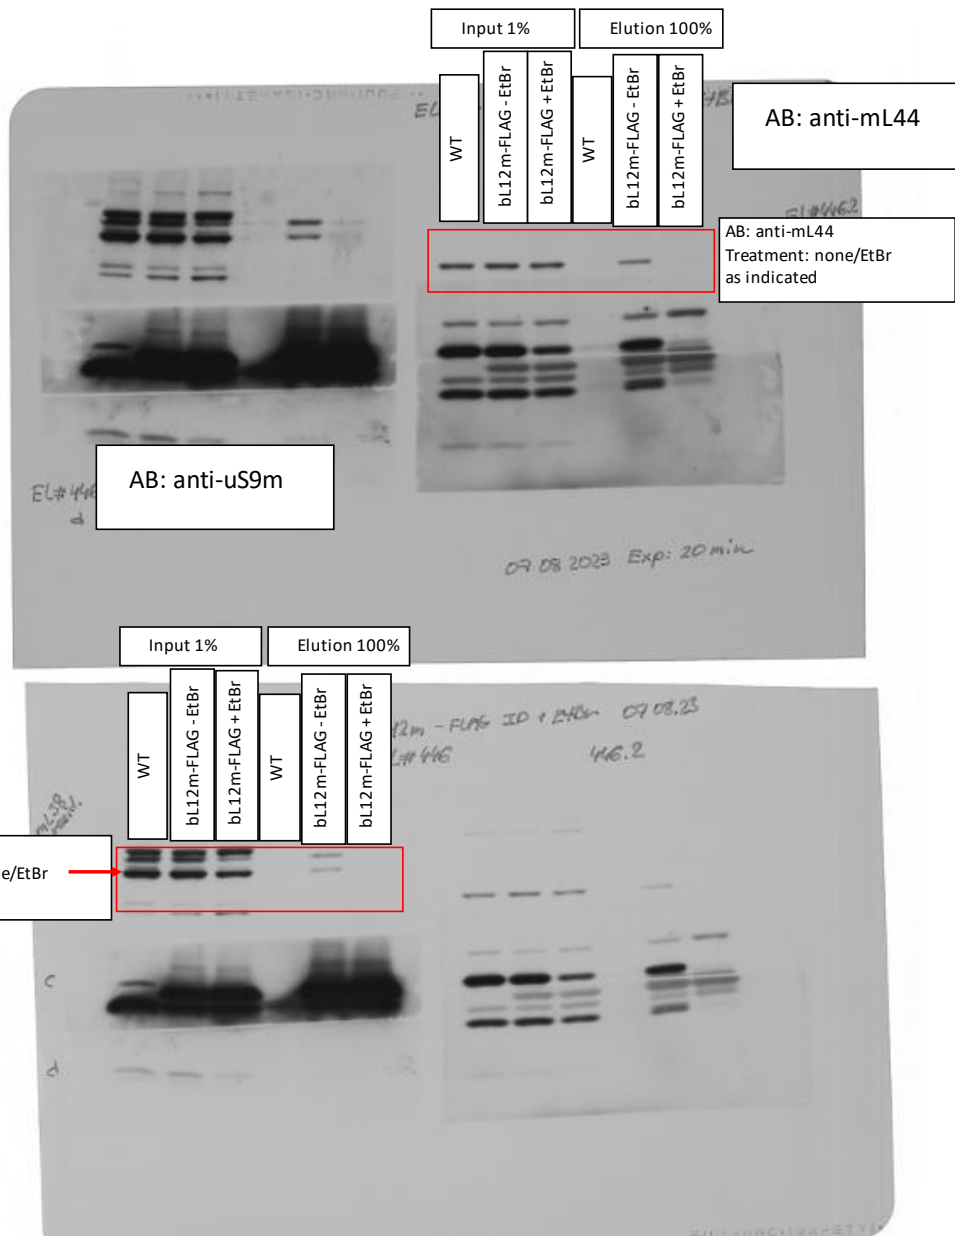



Source Data 4\_related to Extended Data Fig.8d  
 EL#446/MH#200 bL12m-FLAG IP + EtBr treatment

Rotor: N/A  
 Gradient: N/A  
 Speed: N/A  
 Time: N/A

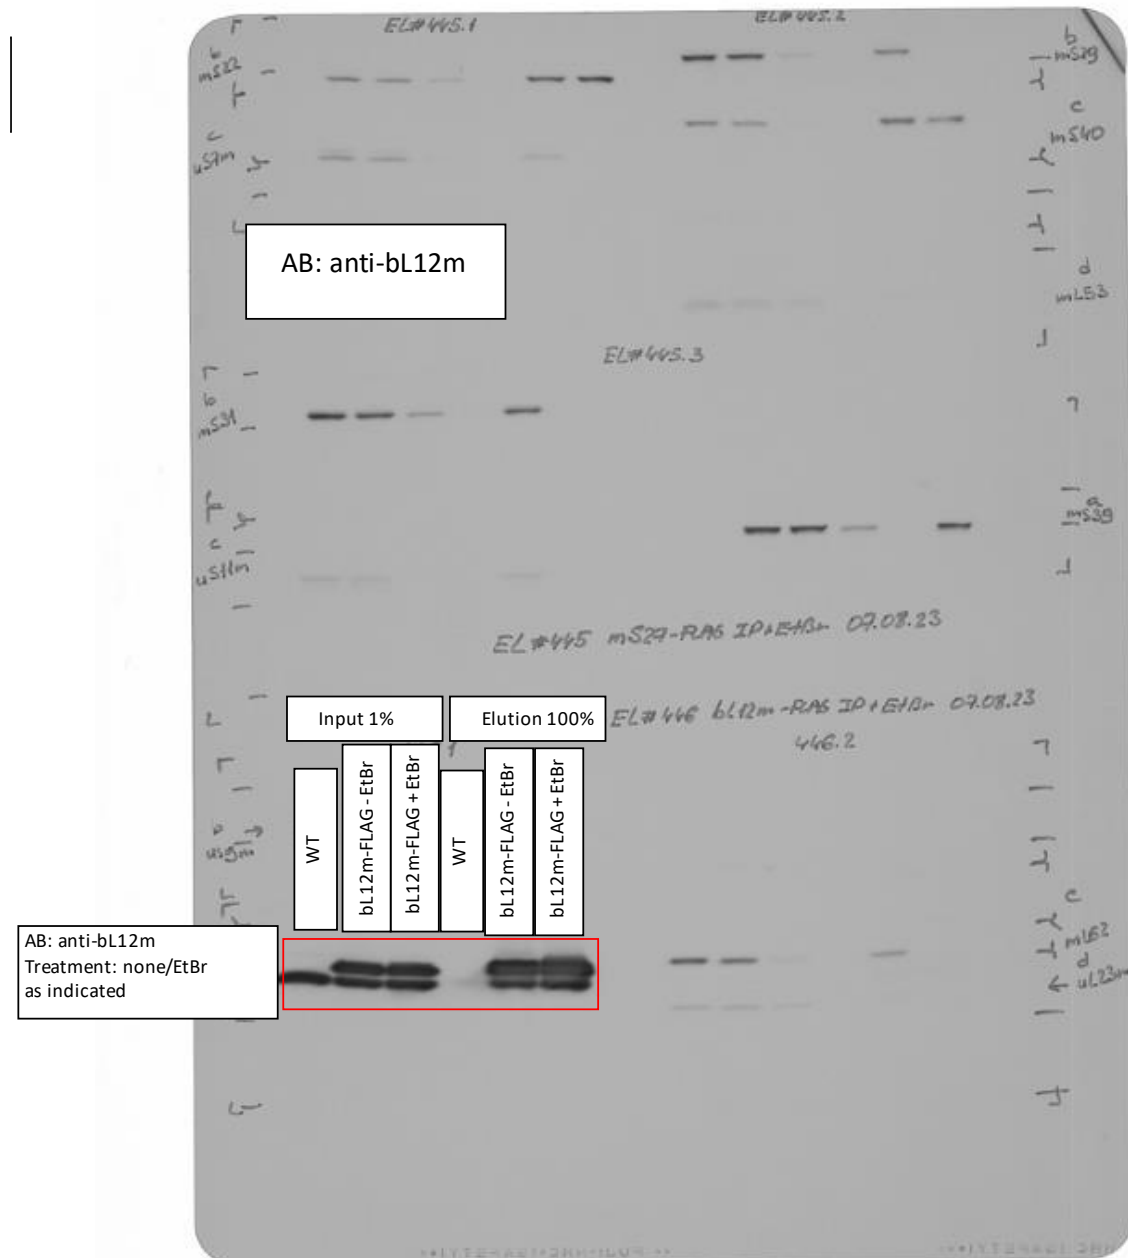

Source Data 4\_related to Extended Data Fig.8d  
EL#446/MH#200 bL12m-FLAG IP + EtBr treatment

Rotor: N/A

Gradient: N/A

Speed: N/A

Time: N/A

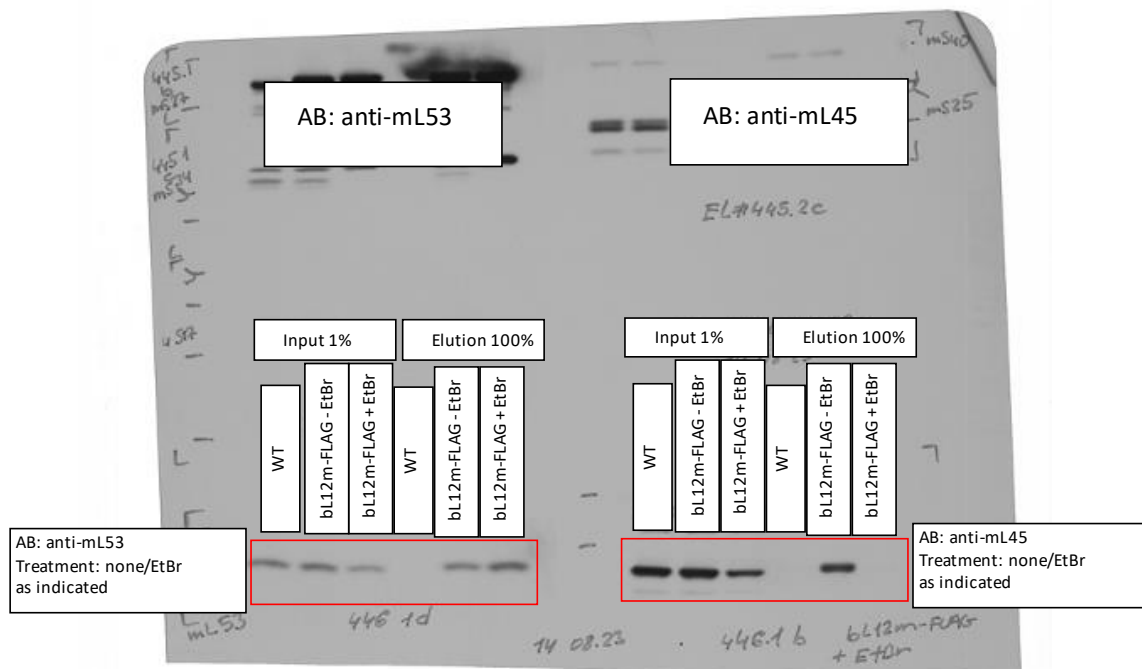

Source Data 4\_related to Extended Data Fig.8d  
 EL#446/MH#200 bL12m-FLAG IP + EtBr treatment

Rotor: N/A  
 Gradient: N/A  
 Speed: N/A  
 Time: N/A

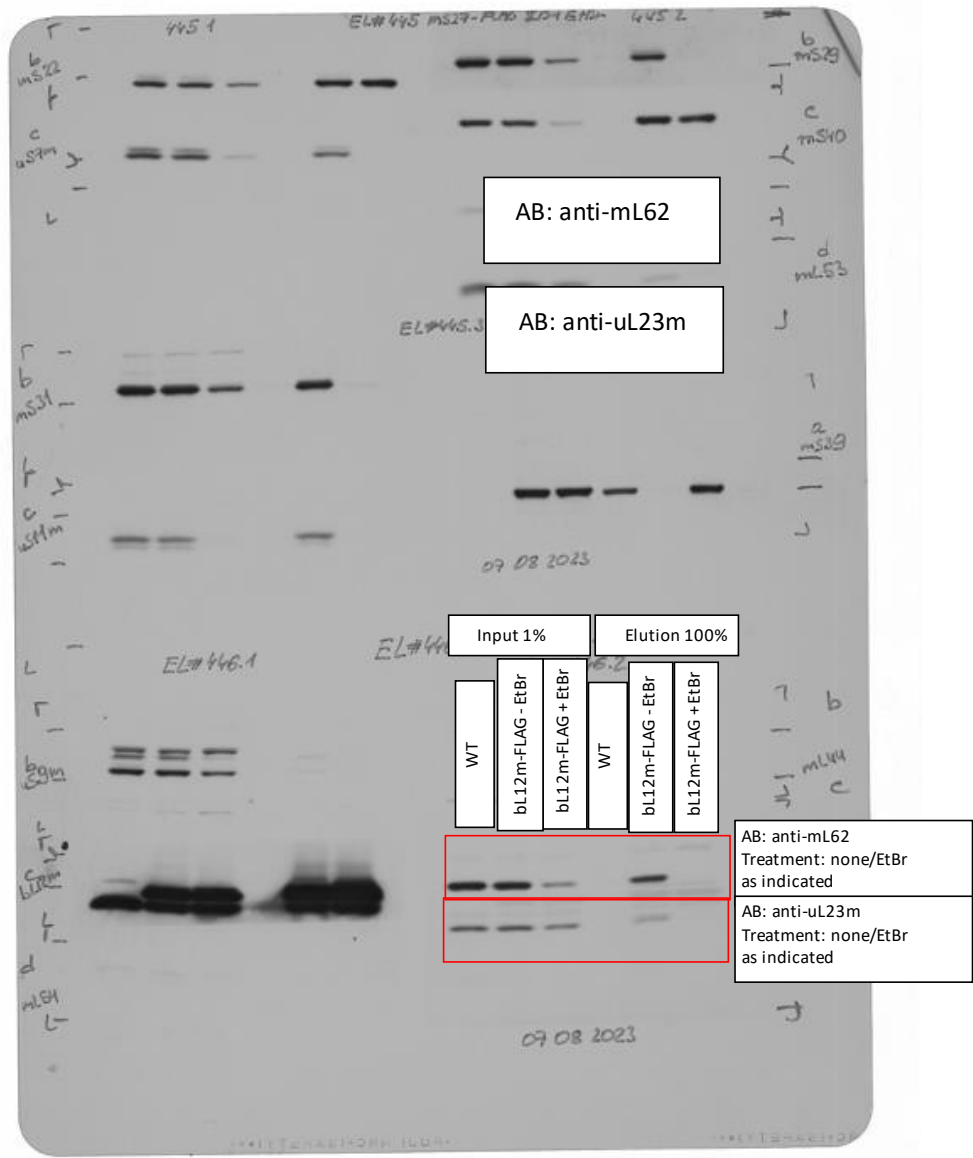

Source Data 4\_related to Extended Data Fig.8f  
 EL#363 HEK293 WT + Ethidium Bromide treatment + Gradient  
 EL#379 HEK293 WT + Ethidium Bromide treatment + Gradient

Rotor: SW41 Ti  
 Gradient: Sucrose 5-30%  
 Speed: 158.000xg  
 Time: 15h

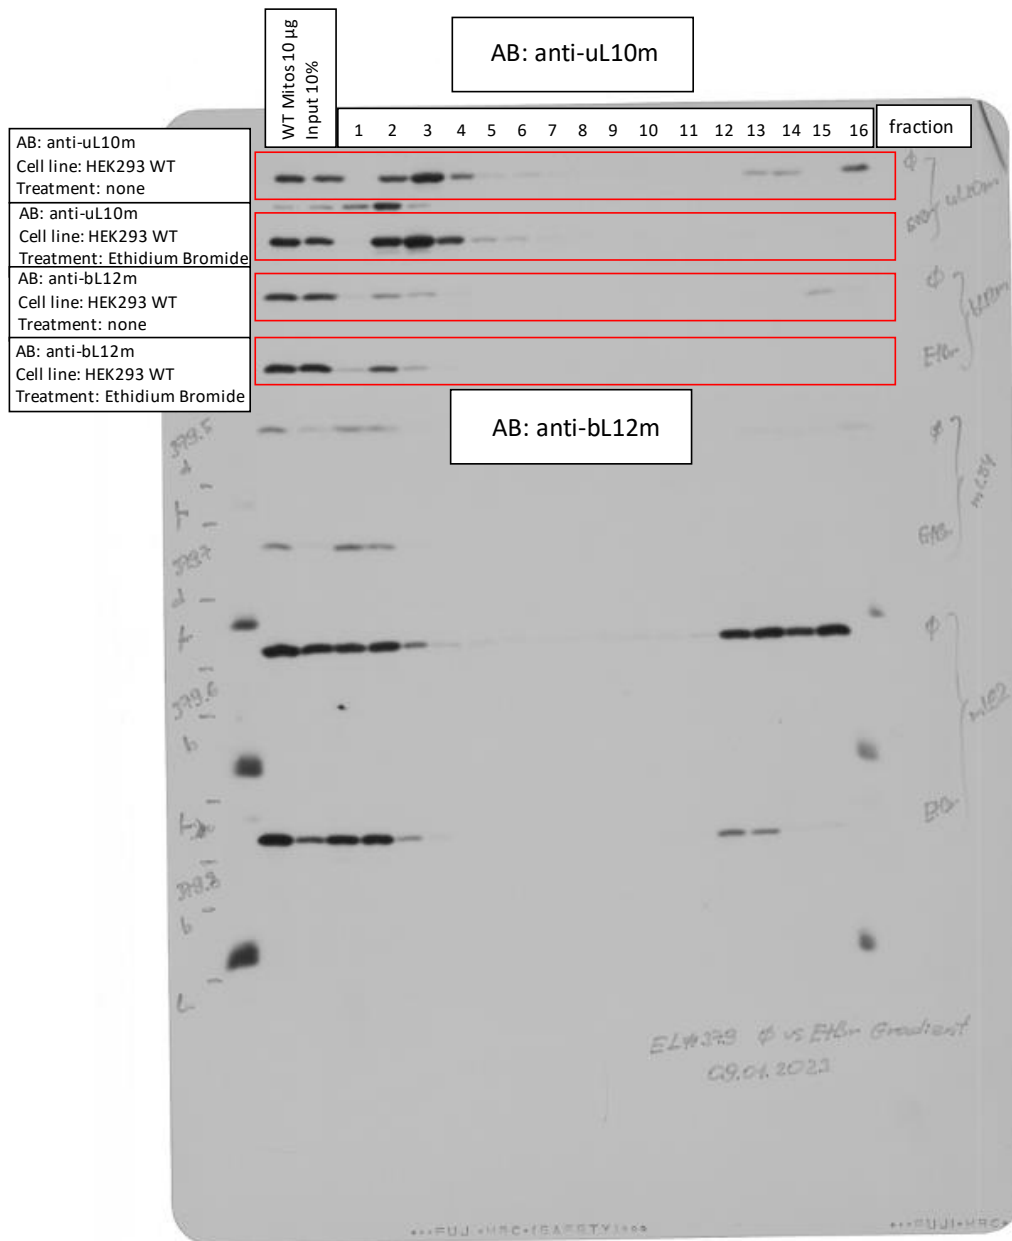

Source Data 4\_related to Extended Data Fig.8f  
 EL#363 HEK293 WT + Ethidium Bromide treatment + Gradient  
 EL#379 HEK293 WT + Ethidium Bromide treatment + Gradient

Rotor: SW41 Ti  
 Gradient: Sucrose 5-30%  
 Speed: 158.000xg  
 Time: 15h

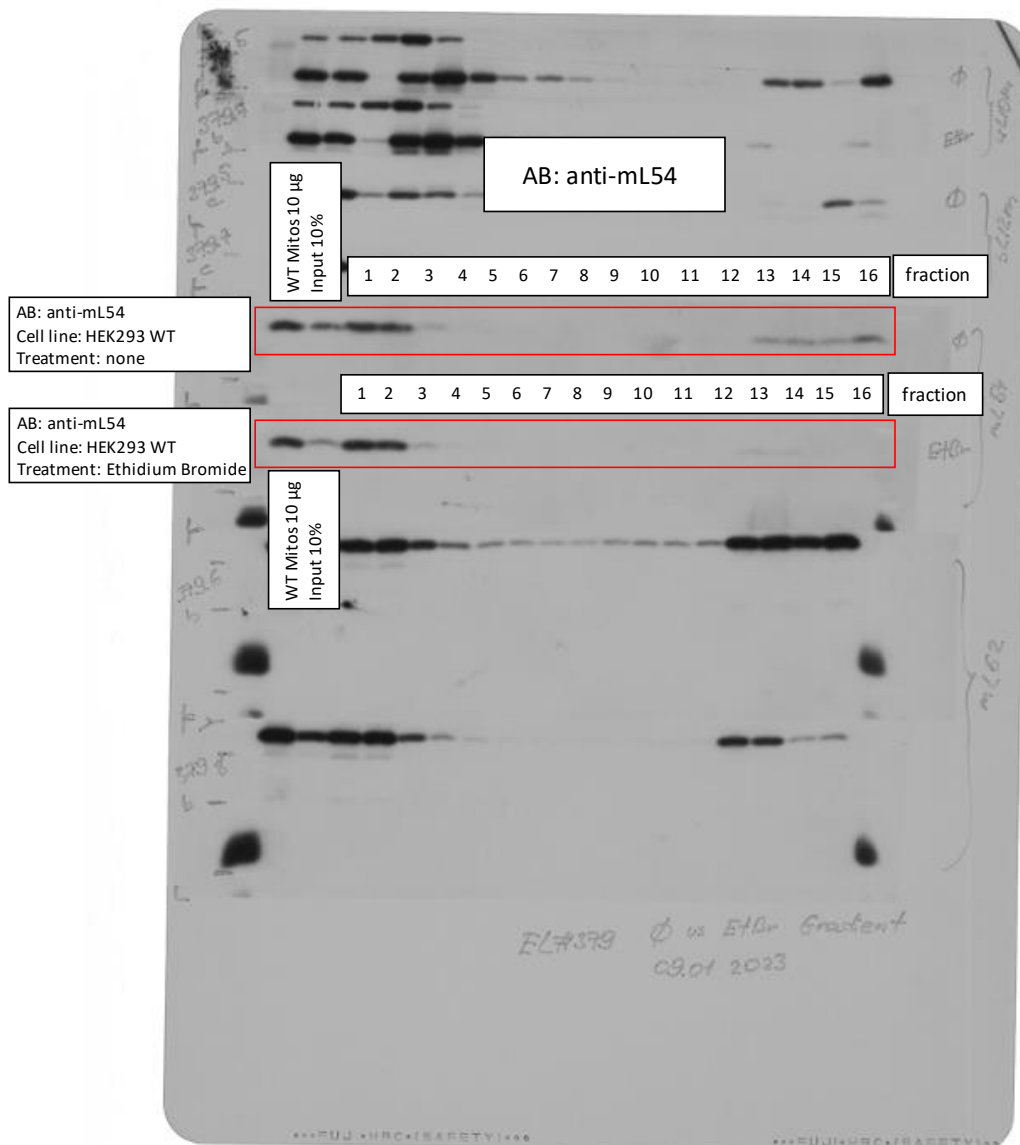

Source Data 4\_related to Extended Data Fig.8f  
 EL#363 HEK293 WT + Ethidium Bromide treatment + Gradient  
 EL#379 HEK293 WT + Ethidium Bromide treatment + Gradient

Rotor: SW41 Ti  
 Gradient: Sucrose 5-30%  
 Speed: 158.000xg  
 Time: 15h

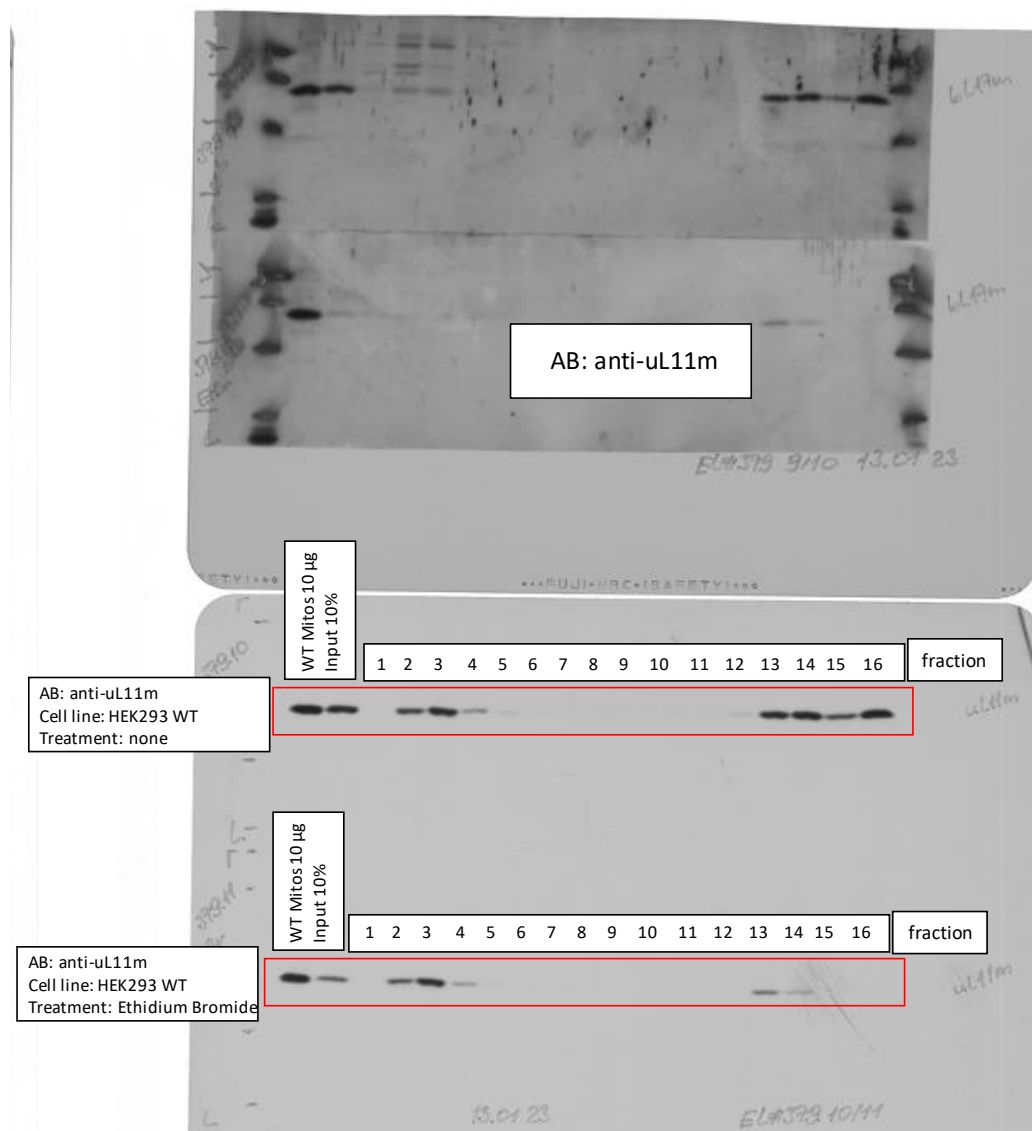

Source Data 4\_related to Extended Data Fig.8f  
EL#363 HEK293 WT + Ethidium Bromide treatment + Gradient  
EL#379 HEK293 WT + Ethidium Bromide treatment + Gradient

Rotor: SW41 Ti  
Gradient: Sucrose 5-30%  
Speed: 158.000xg  
Time: 15h

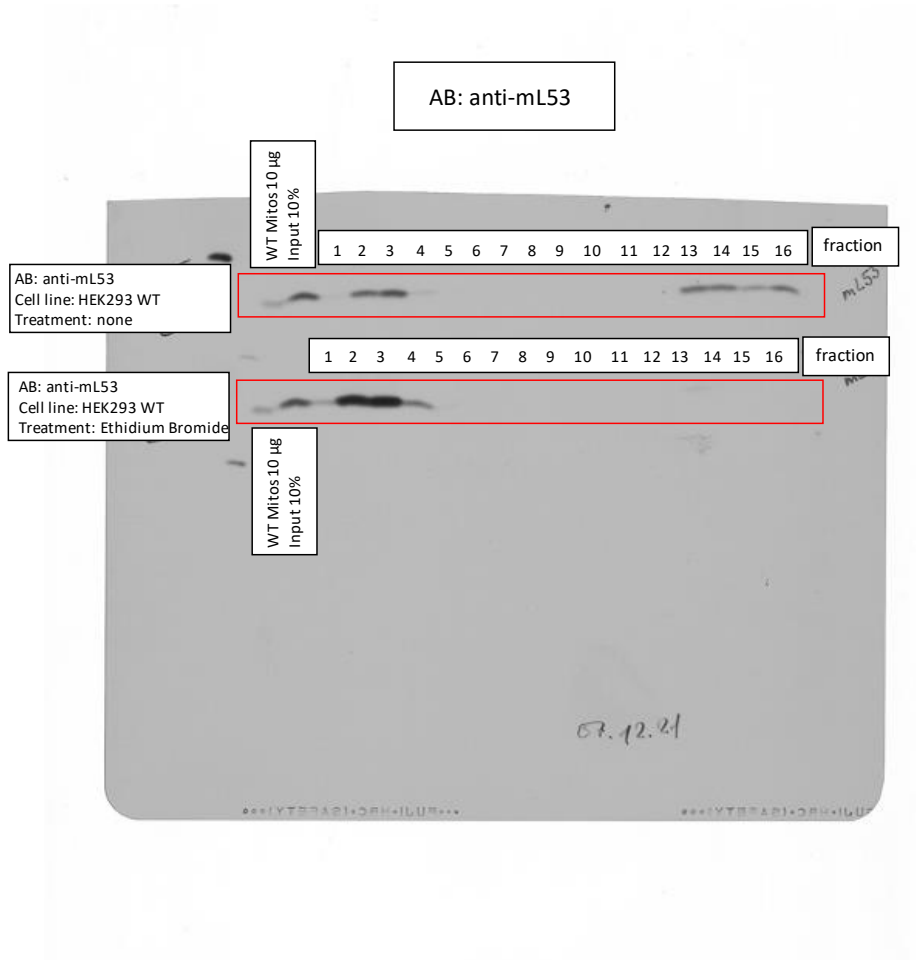

Supplement: 41594_2024_1356_MOESM25_ESM.pdf [file 41594_2024_1356_MOESM25_ESM.pdf]
