# Supplementary material for: A roadmap for ribosome assembly in human mitochondria
Source: PubMed Central journal article supplement (PMC11638073; doi:10.1038/s41594-024-01356-w), 2024-07-11

Source Data 5\_related to Extended Data Fig.9a

EL#353 mL44-FLAG IP + Gradient

Rotor: SW41 Ti

Gradient: Sucrose 5-30%

Speed: 158.000xg

Time: 15h

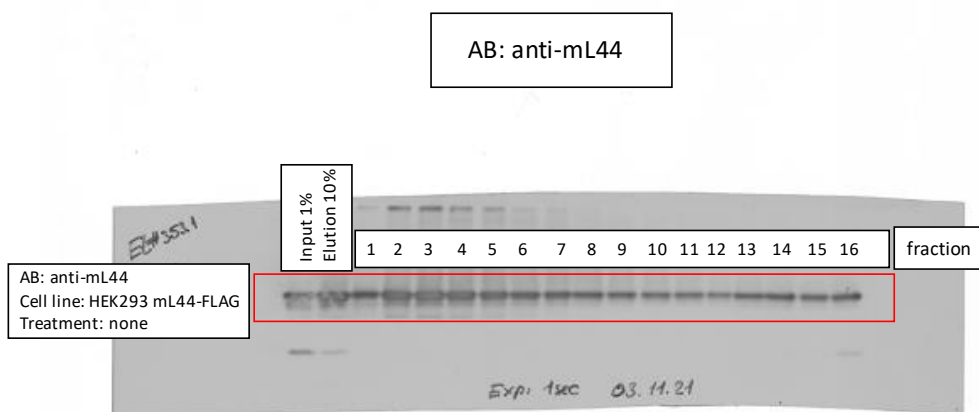

Source Data 5\_related to Extended Data Fig.9a

EL#353 mL44-FLAG IP + Gradient

Rotor: SW41 Ti

Gradient: Sucrose 5-30%

Speed: 158.000xg

Time: 15h

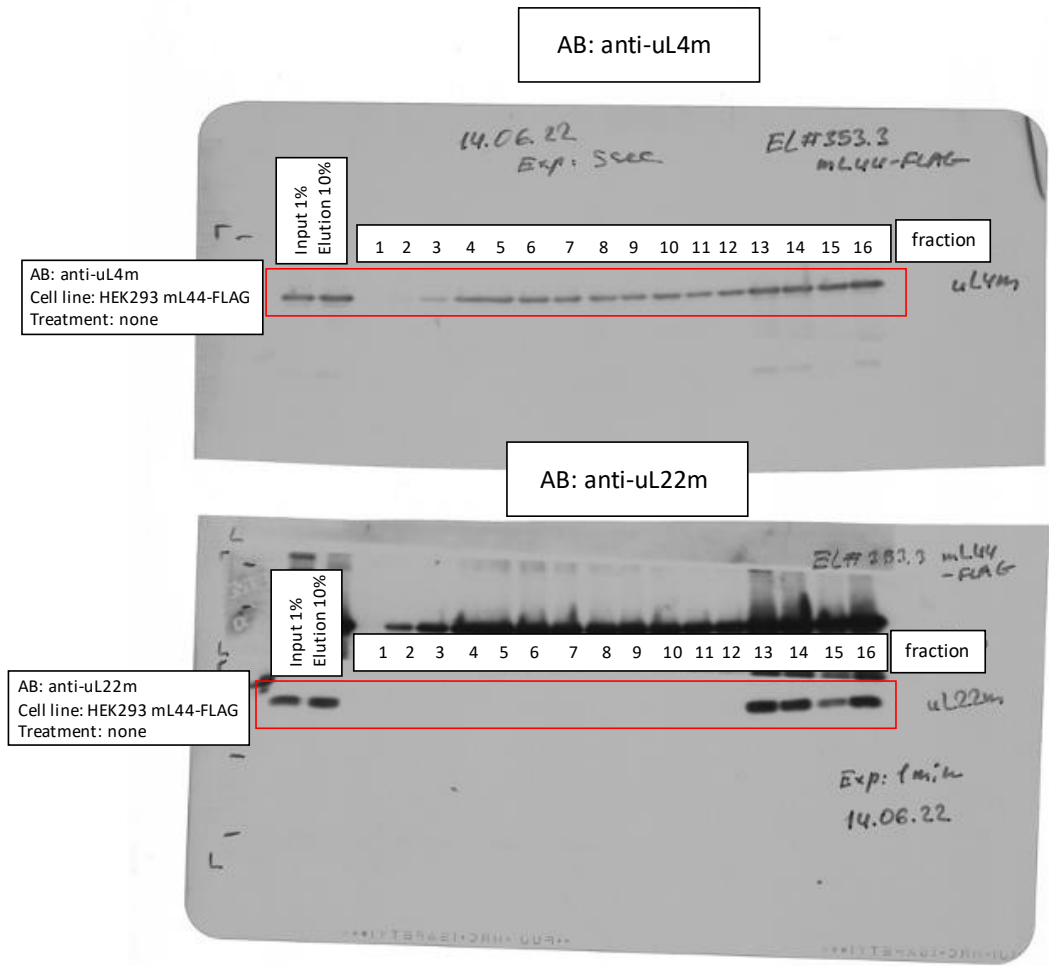

Source Data 5\_related to Extended Data Fig.9a

EL#353 mL44-FLAG IP + Gradient

Rotor: SW41 Ti

Gradient: Sucrose 5-30%

Speed: 158.000xg

Time: 15h

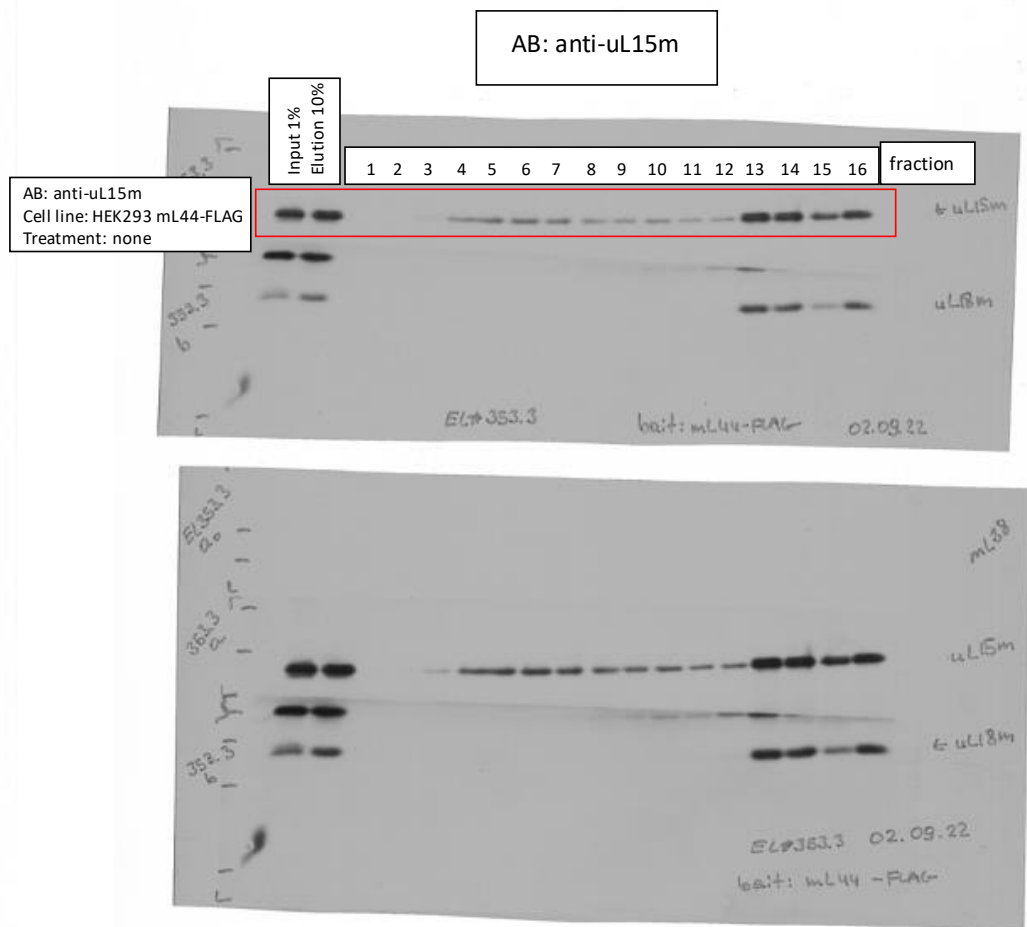

Source Data 5\_related to Extended Data Fig.9a

EL#353 mL44-FLAG IP + Gradient

Rotor: SW41 Ti

Gradient: Sucrose 5-30%

Speed: 158.000xg

Time: 15h

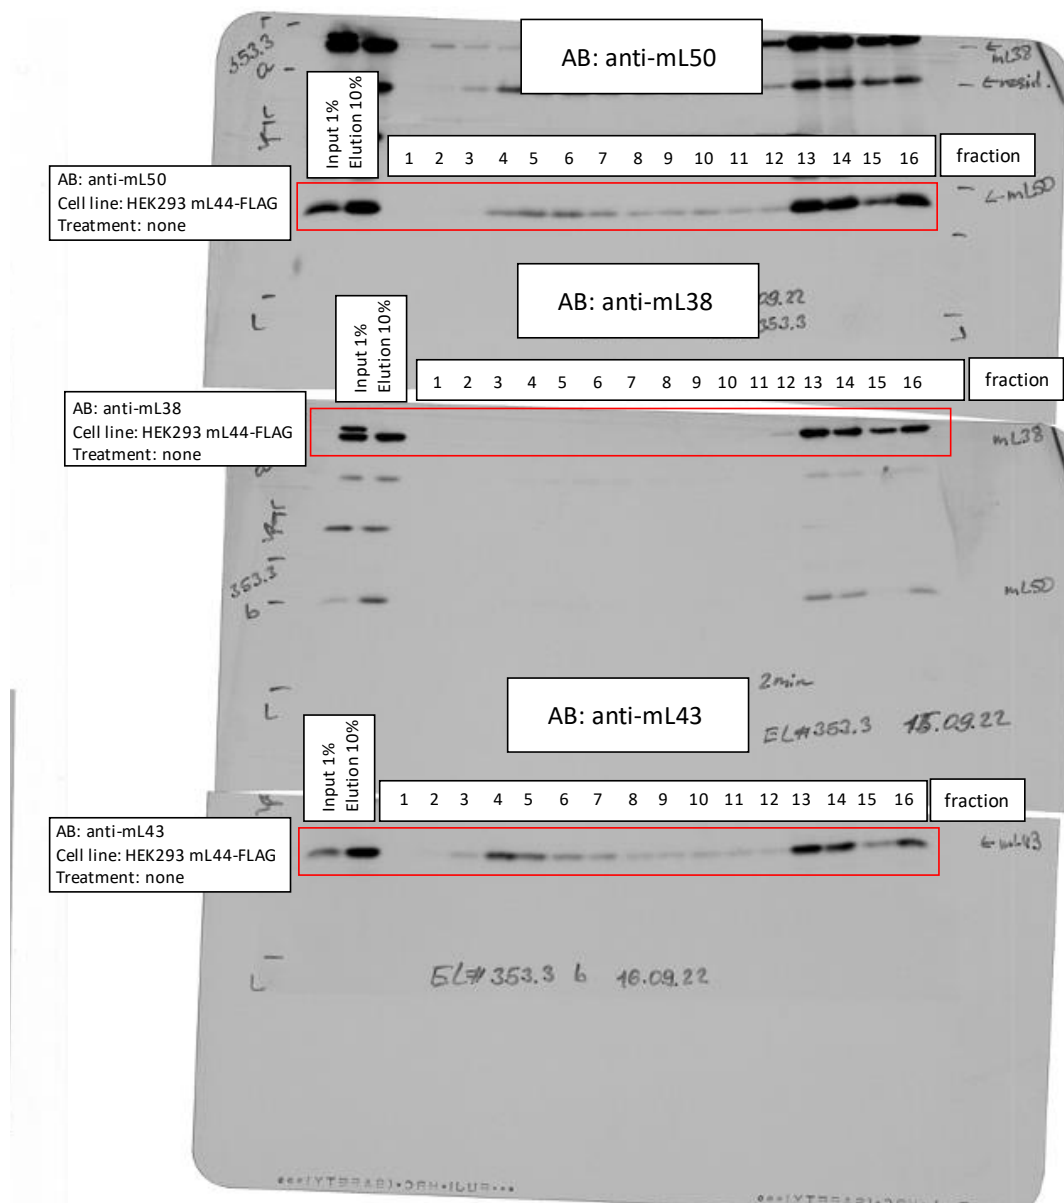

Source Data 5\_related to Extended Data Fig.9a

EL#353 mL44-FLAG IP + Gradient

Rotor: SW41 Ti

Gradient: Sucrose 5-30%

Speed: 158.000xg

Time: 15h

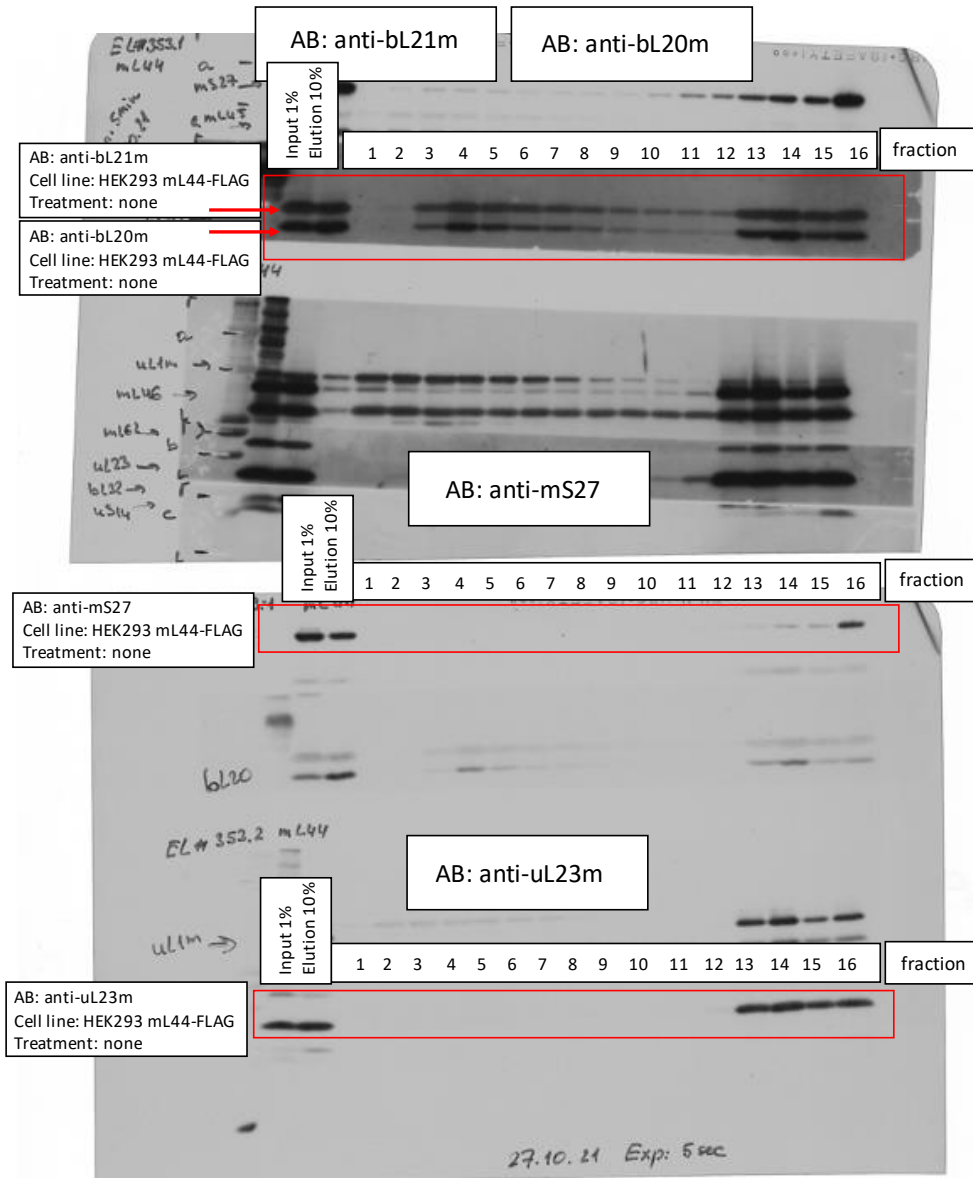

Source Data 5\_related to Extended Data Fig.9a

EL#353 mL44-FLAG IP + Gradient

Rotor: SW41 Ti

Gradient: Sucrose 5-30%

Speed: 158.000xg

Time: 15h

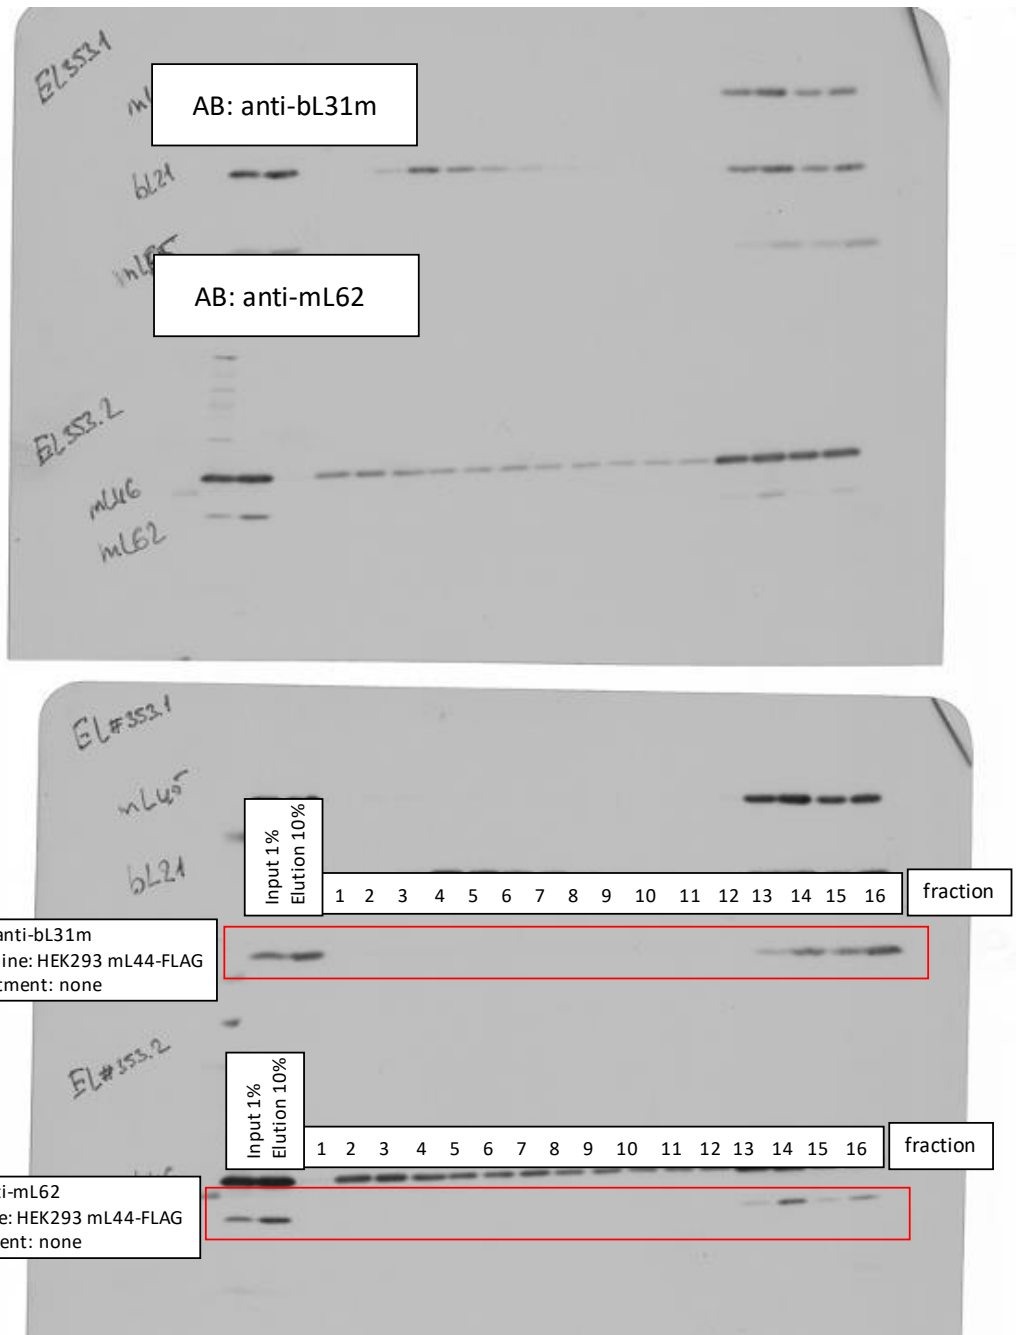

Source Data 5\_related to Extended Data Fig.9b

EL#353 mL44-FLAG IP + Gradient

Rotor: SW41 Ti

Gradient: Sucrose 5-30%

Speed: 158.000xg

Time: 15h

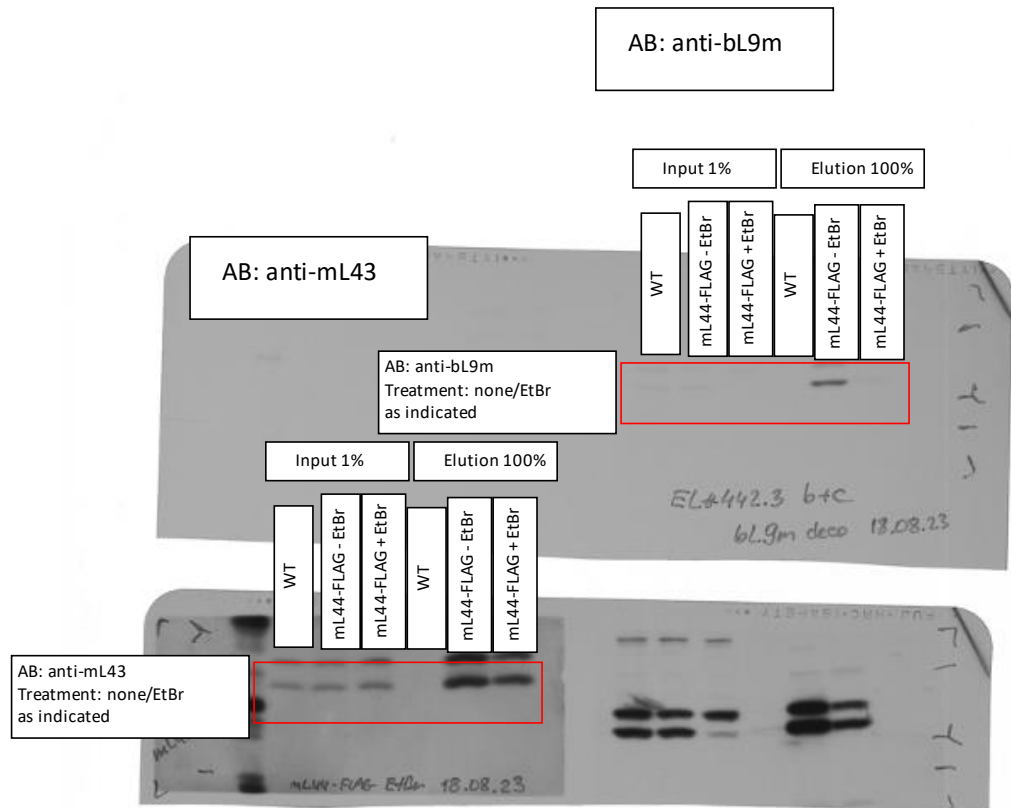

Source Data 5\_related to Extended Data Fig.9b

EL#353 mL44-FLAG IP + Gradient

Rotor: SW41 Ti

Gradient: Sucrose 5-30%

Speed: 158.000xg

Time: 15h

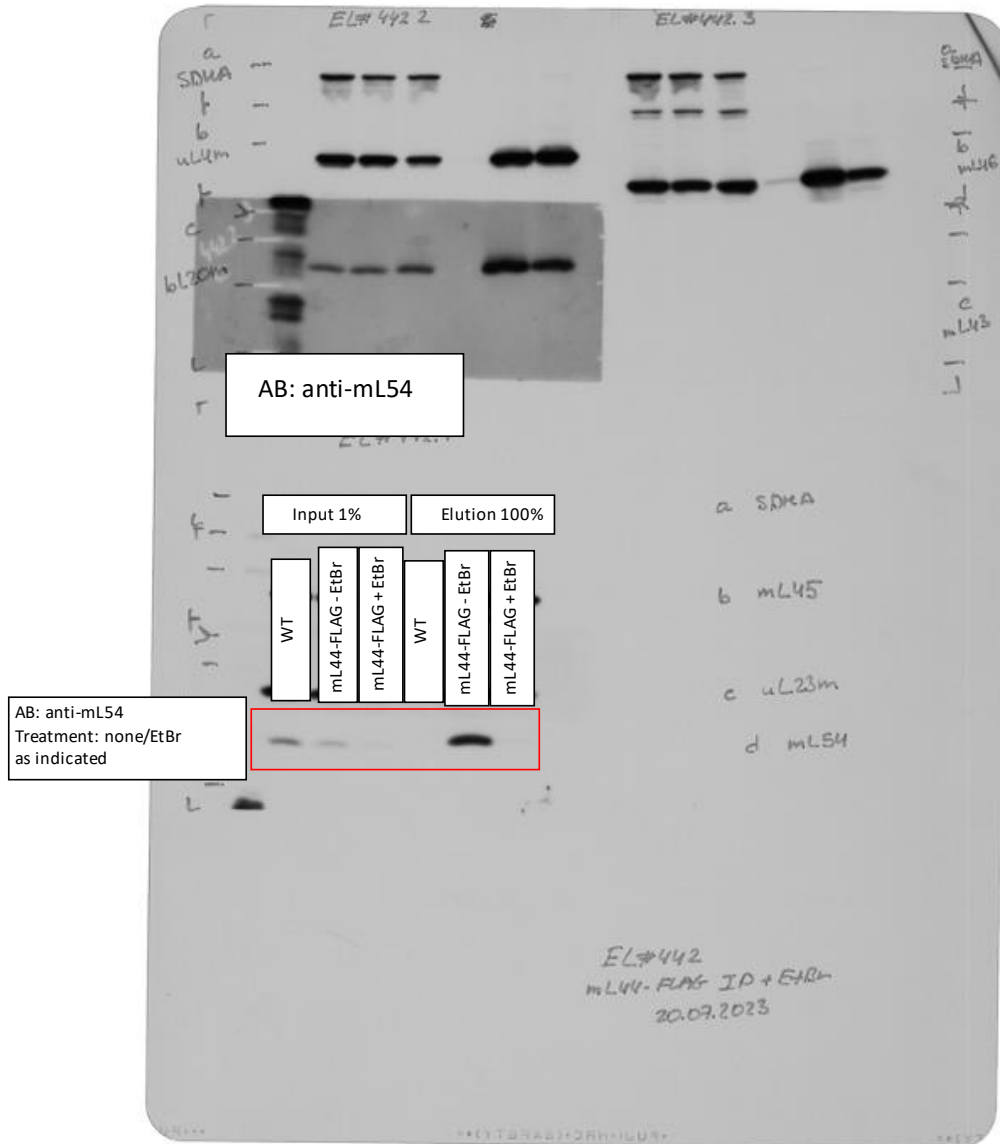



Source Data 5\_related to Extended Data Fig.9b

EL#353 mL44-FLAG IP + Gradient

Rotor: SW41 Ti

Gradient: Sucrose 5-30%

Speed: 158.000xg

Time: 15h

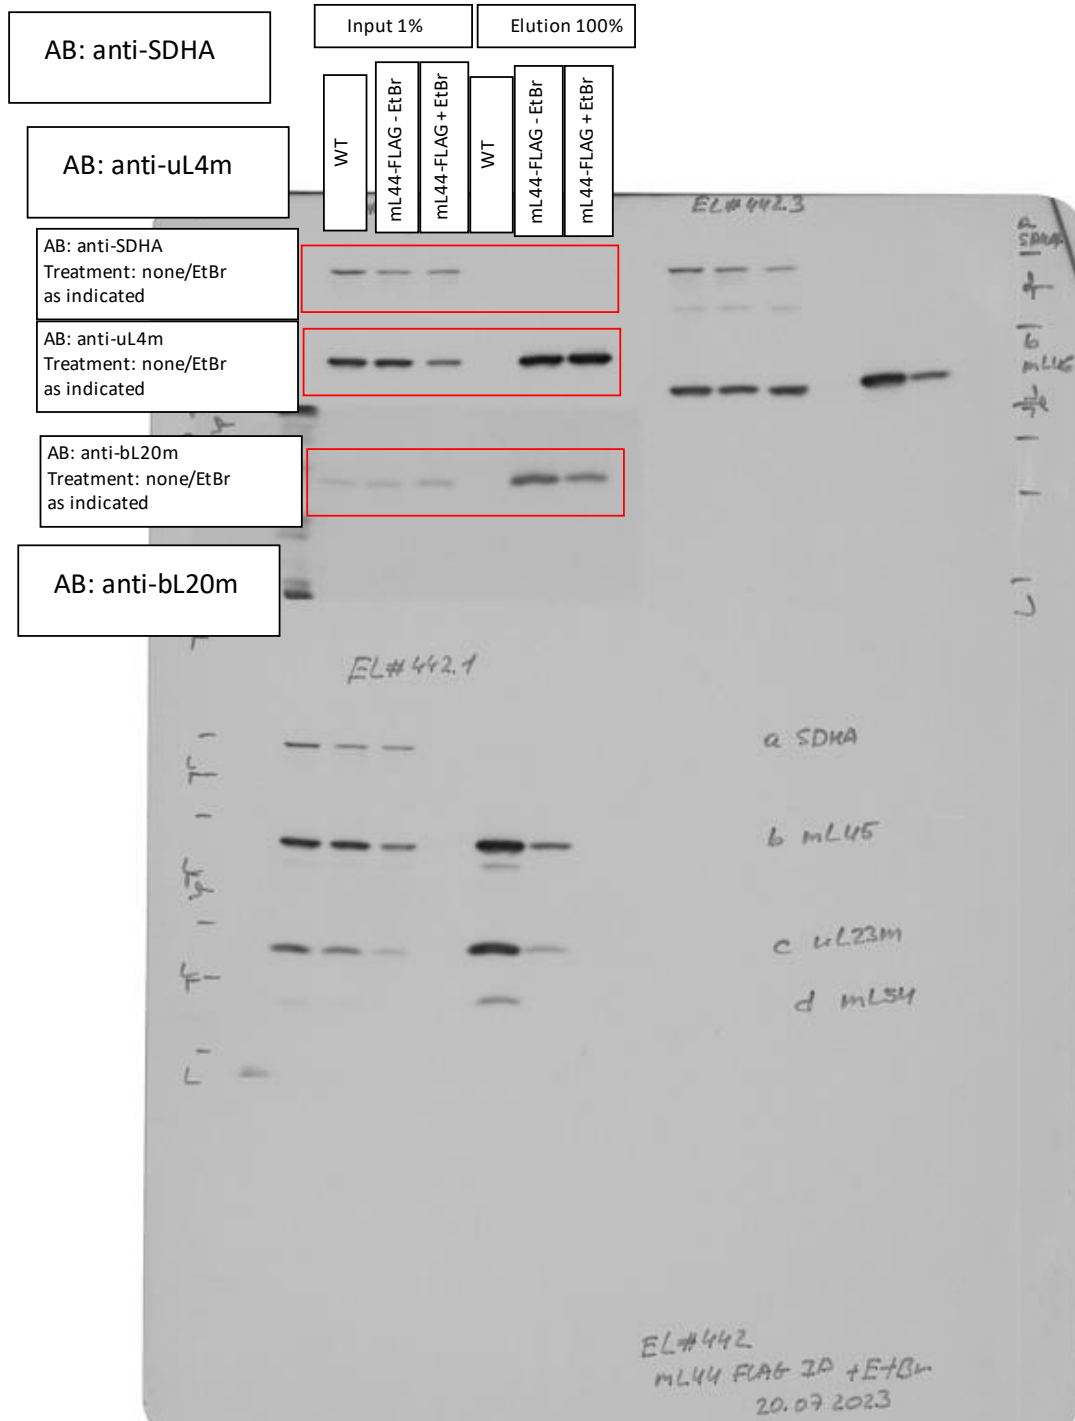

Source Data 5\_related to Extended Data Fig.9b

EL#353 mL44-FLAG IP + Gradient

Rotor: SW41 Ti

Gradient: Sucrose 5-30%

Speed: 158.000xg

Time: 15h

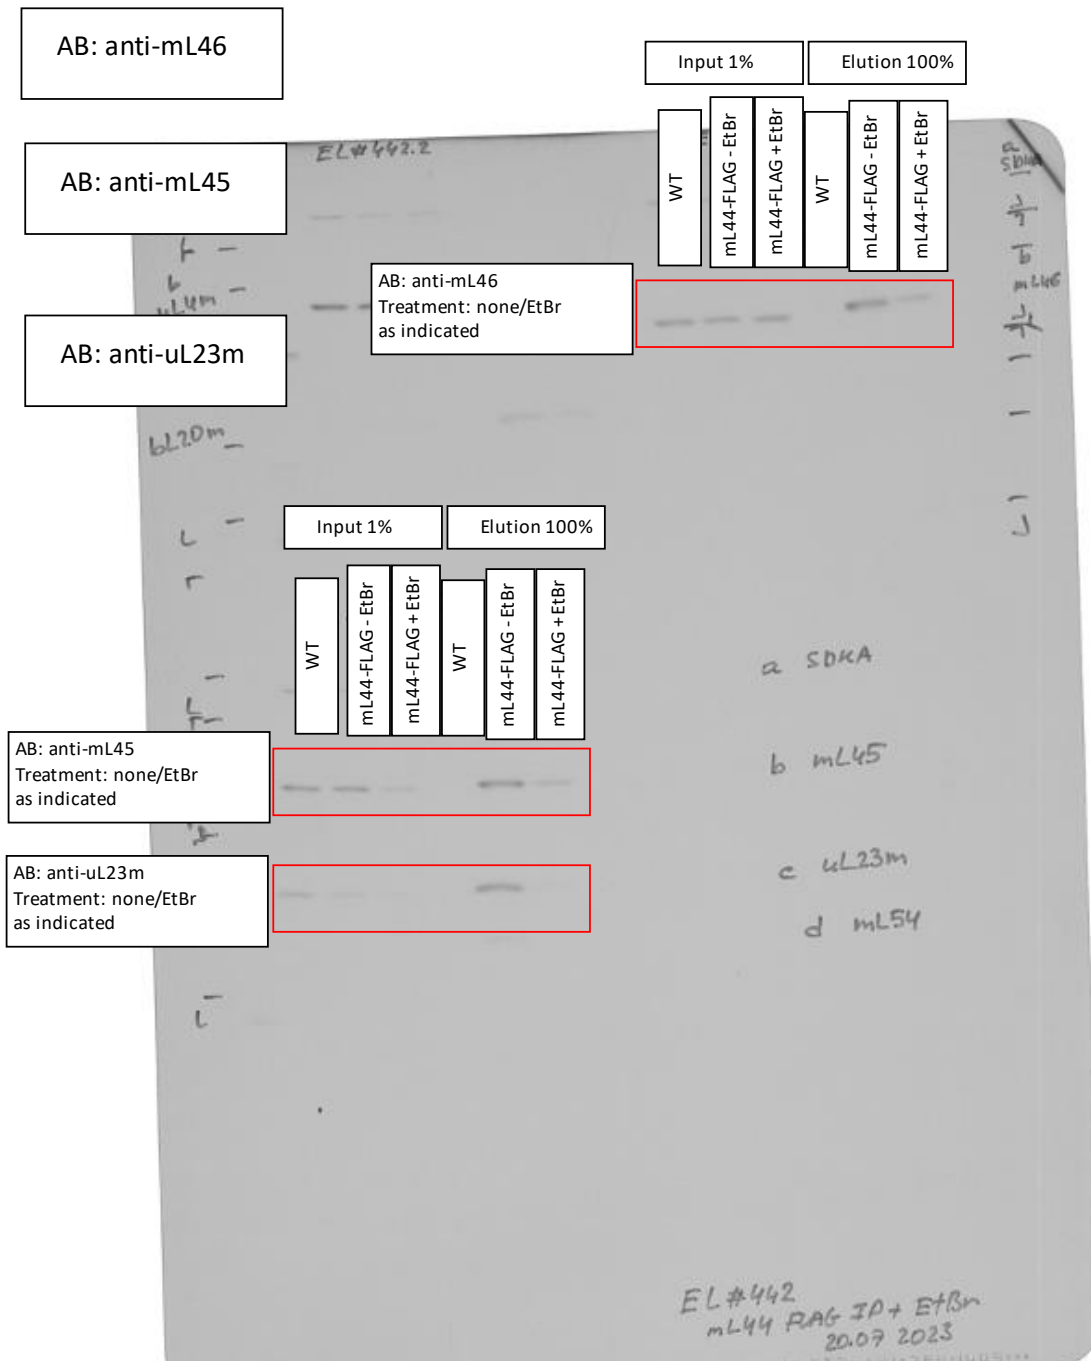

Source Data 5\_related to Extended Data Fig.9b

EL#353 mL44-FLAG IP + Gradient

Rotor: SW41 Ti

Gradient: Sucrose 5-30%

Speed: 158.000xg

Time: 15h

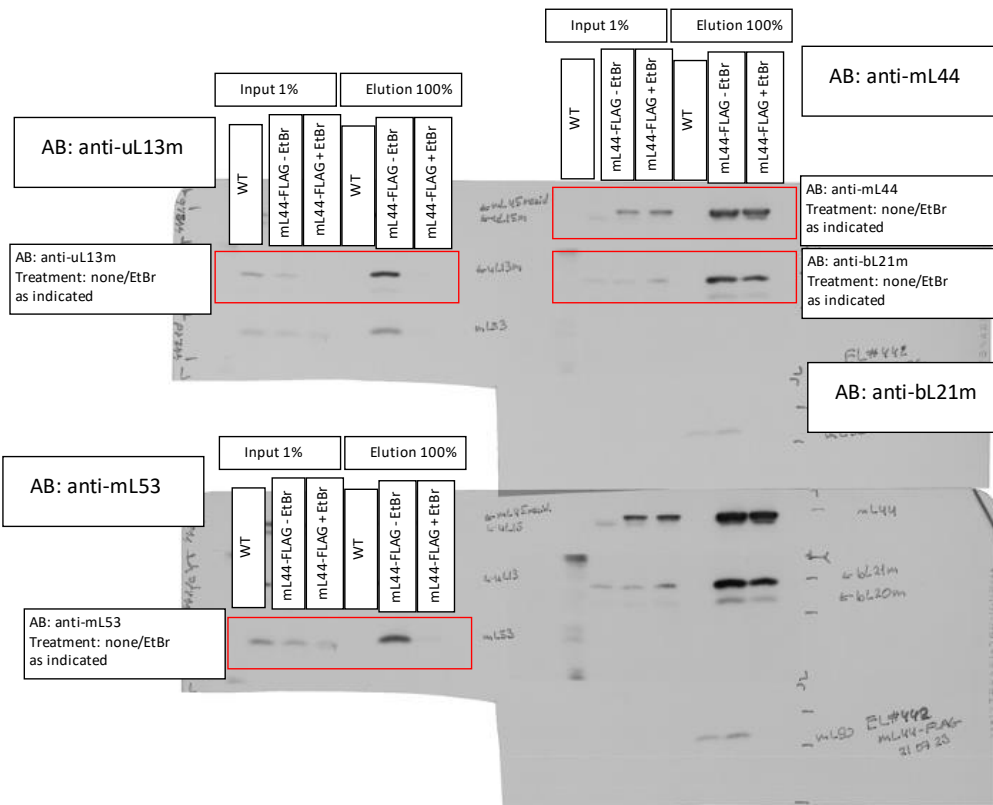

Source Data 5\_related to Extended Data Fig.9b

EL#353 mL44-FLAG IP + Gradient

Rotor: SW41 Ti

Gradient: Sucrose 5-30%

Speed: 158.000xg

Time: 15h

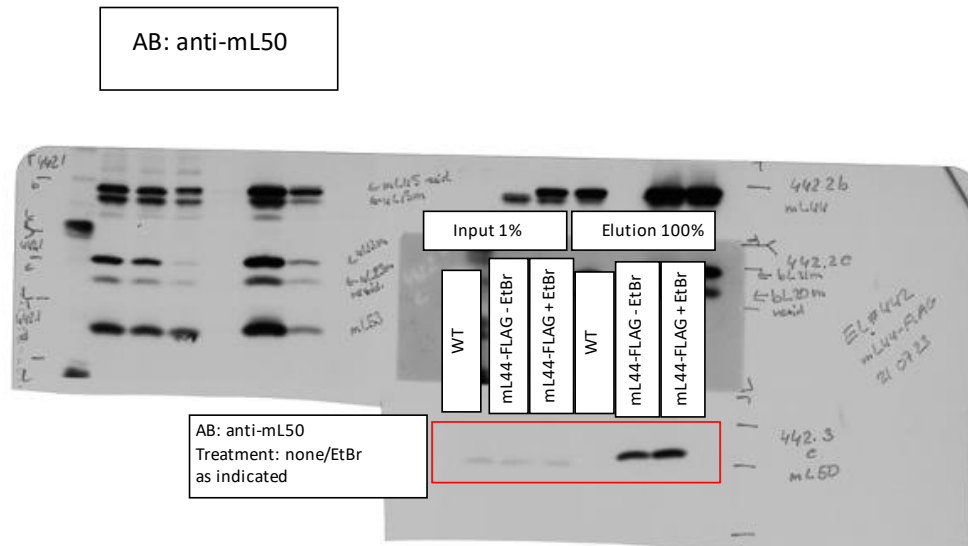

Source Data 5\_related to Extended Data Fig.9b

EL#353 mL44-FLAG IP + Gradient

Rotor: SW41 Ti

Gradient: Sucrose 5-30%

Speed: 158.000xg

Time: 15h

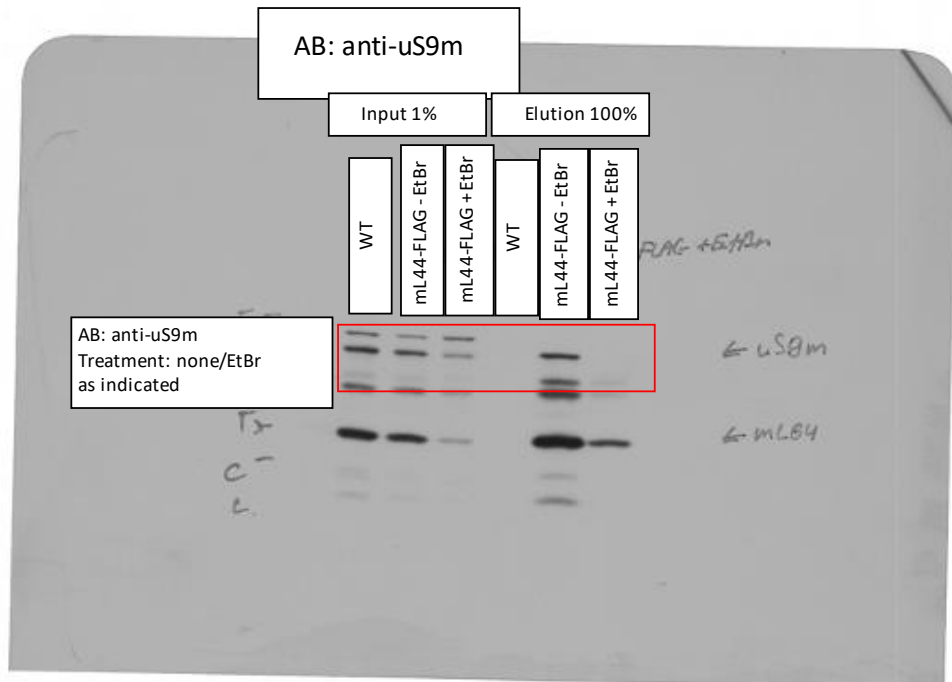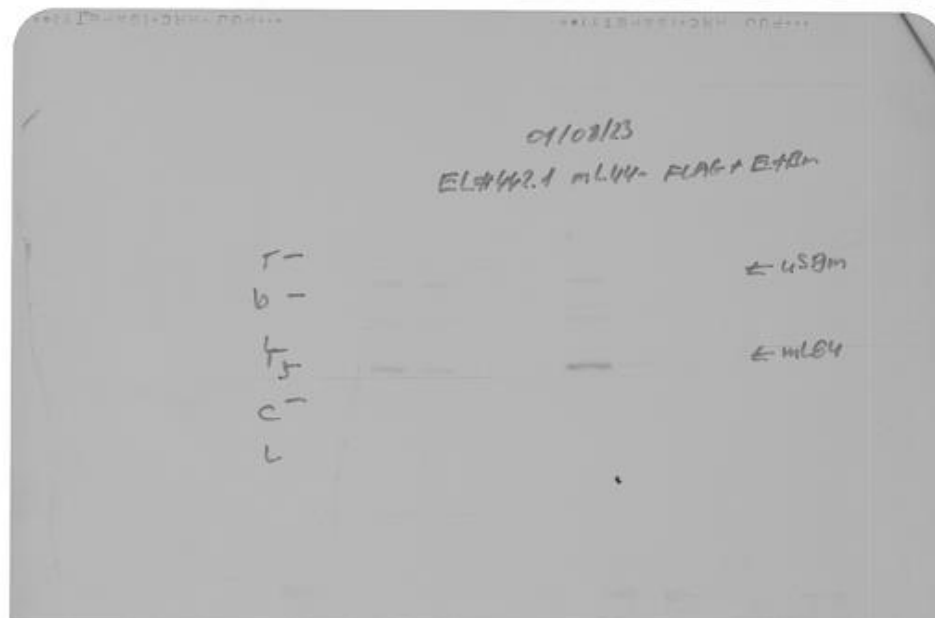

Source Data 5\_related to Extended Data Fig.9c  
 EL#363 HEK293 WT + Ethidium Bromide treatment + Gradient  
 EL#379 HEK293 WT + Ethidium Bromide treatment + Gradient

Rotor: SW41 Ti  
 Gradient: Sucrose 5-30%  
 Speed: 158.000xg  
 Time: 15h

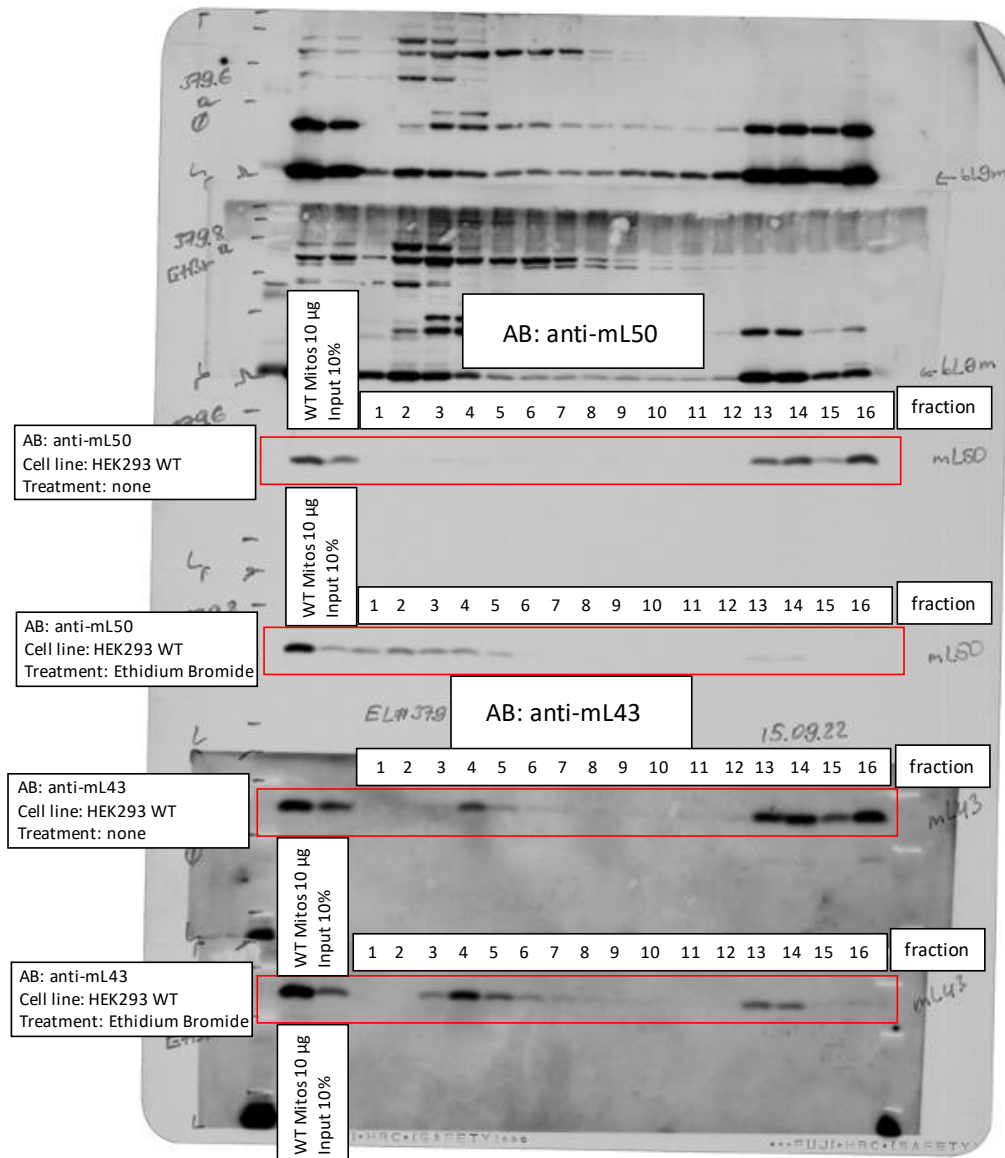

Source Data 5\_related to Extended Data Fig.9c  
 EL#363 HEK293 WT + Ethidium Bromide treatment + Gradient  
 EL#379 HEK293 WT + Ethidium Bromide treatment + Gradient

Rotor: SW41 Ti  
 Gradient: Sucrose 5-30%  
 Speed: 158.000xg  
 Time: 15h

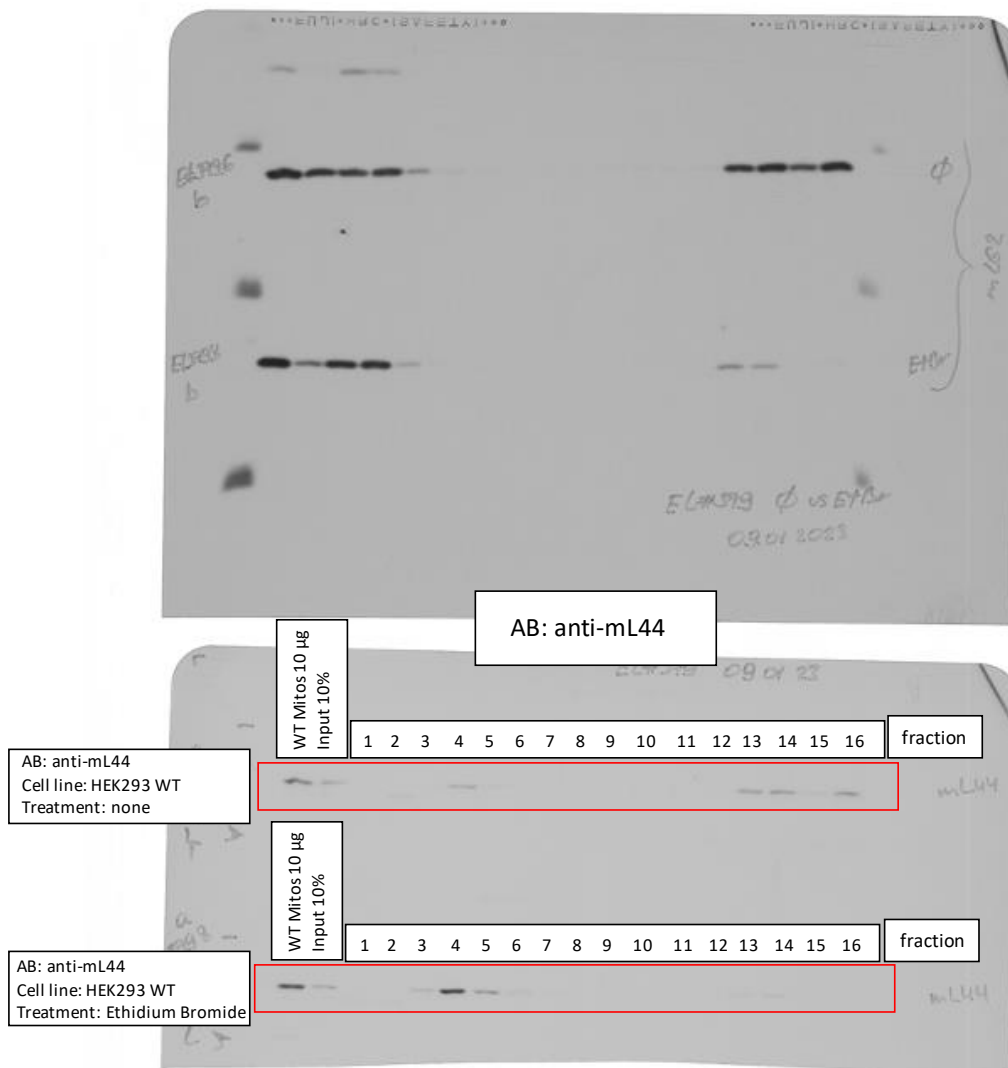

Source Data 5\_related to Extended Data Fig.9c  
 EL#363 HEK293 WT + Ethidium Bromide treatment + Gradient  
 EL#379 HEK293 WT + Ethidium Bromide treatment + Gradient

Rotor: SW41 Ti  
 Gradient: Sucrose 5-30%  
 Speed: 158.000xg  
 Time: 15h

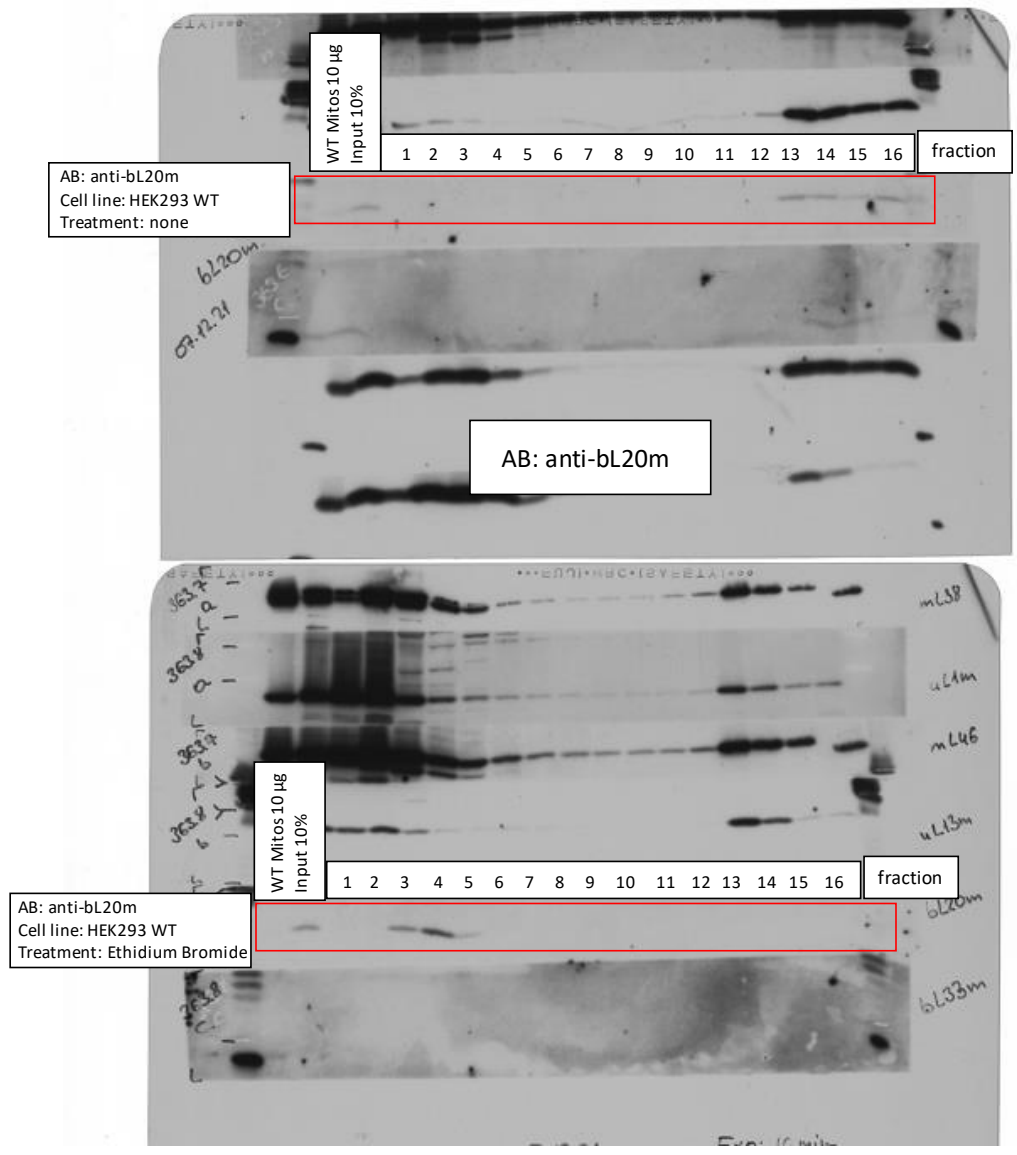



Source Data 5\_related to Extended Data Fig.9c  
EL#363 HEK293 WT + Ethidium Bromide treatment + Gradient  
EL#379 HEK293 WT + Ethidium Bromide treatment + Gradient

Rotor: SW41 Ti  
Gradient: Sucrose 5-30%  
Speed: 158.000xg  
Time: 15h

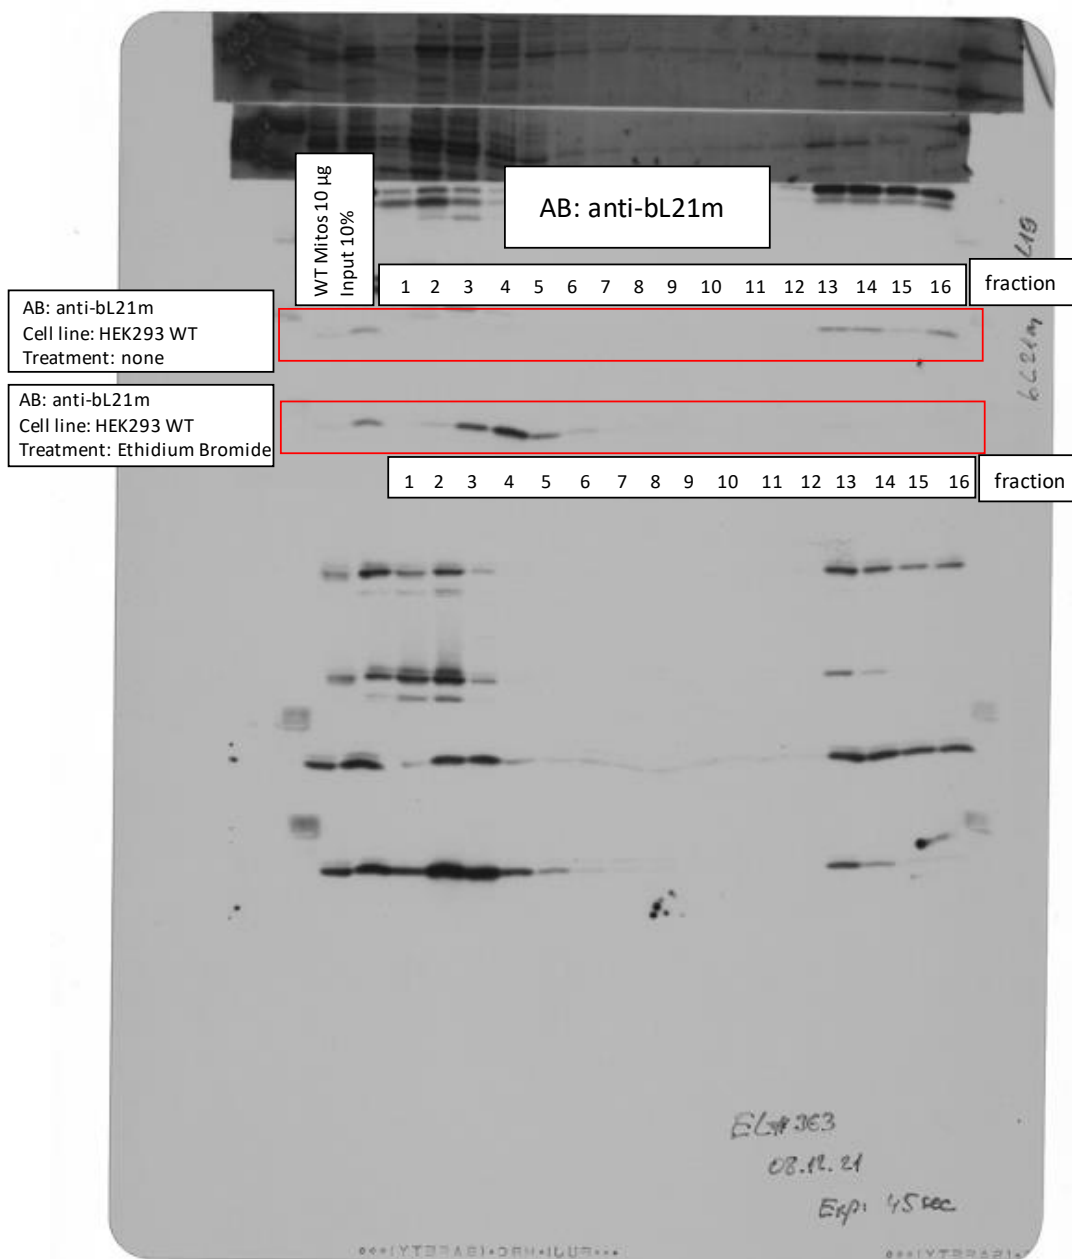

Source Data 5\_related to Extended Data Fig.9c  
 EL#363 HEK293 WT + Ethidium Bromide treatment + Gradient  
 EL#379 HEK293 WT + Ethidium Bromide treatment + Gradient

Rotor: SW41 Ti  
 Gradient: Sucrose 5-30%  
 Speed: 158.000xg  
 Time: 15h

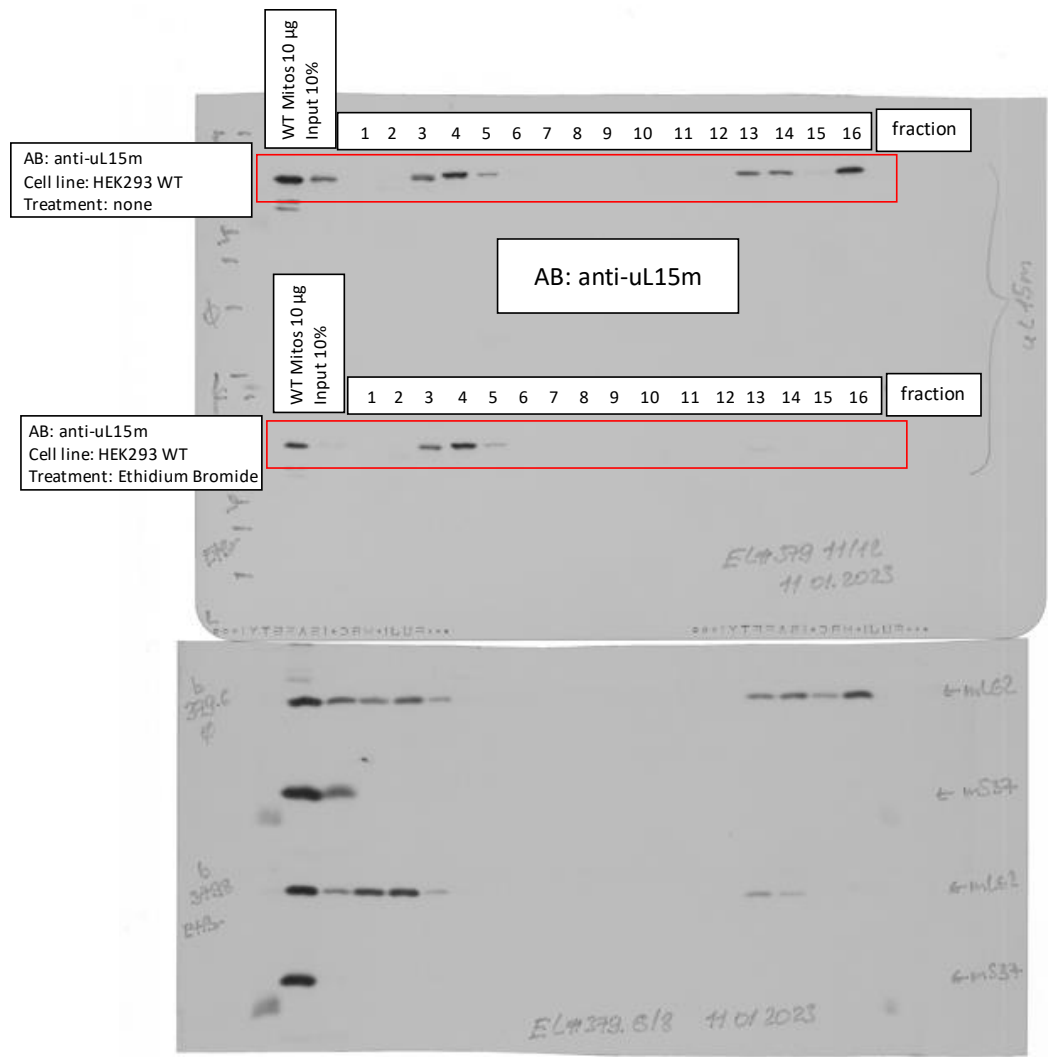

Source Data 5\_related to Extended Data Fig.9c  
 EL#363 HEK293 WT + Ethidium Bromide treatment + Gradient  
 EL#379 HEK293 WT + Ethidium Bromide treatment + Gradient

Rotor: SW41 Ti  
 Gradient: Sucrose 5-30%  
 Speed: 158.000xg  
 Time: 15h

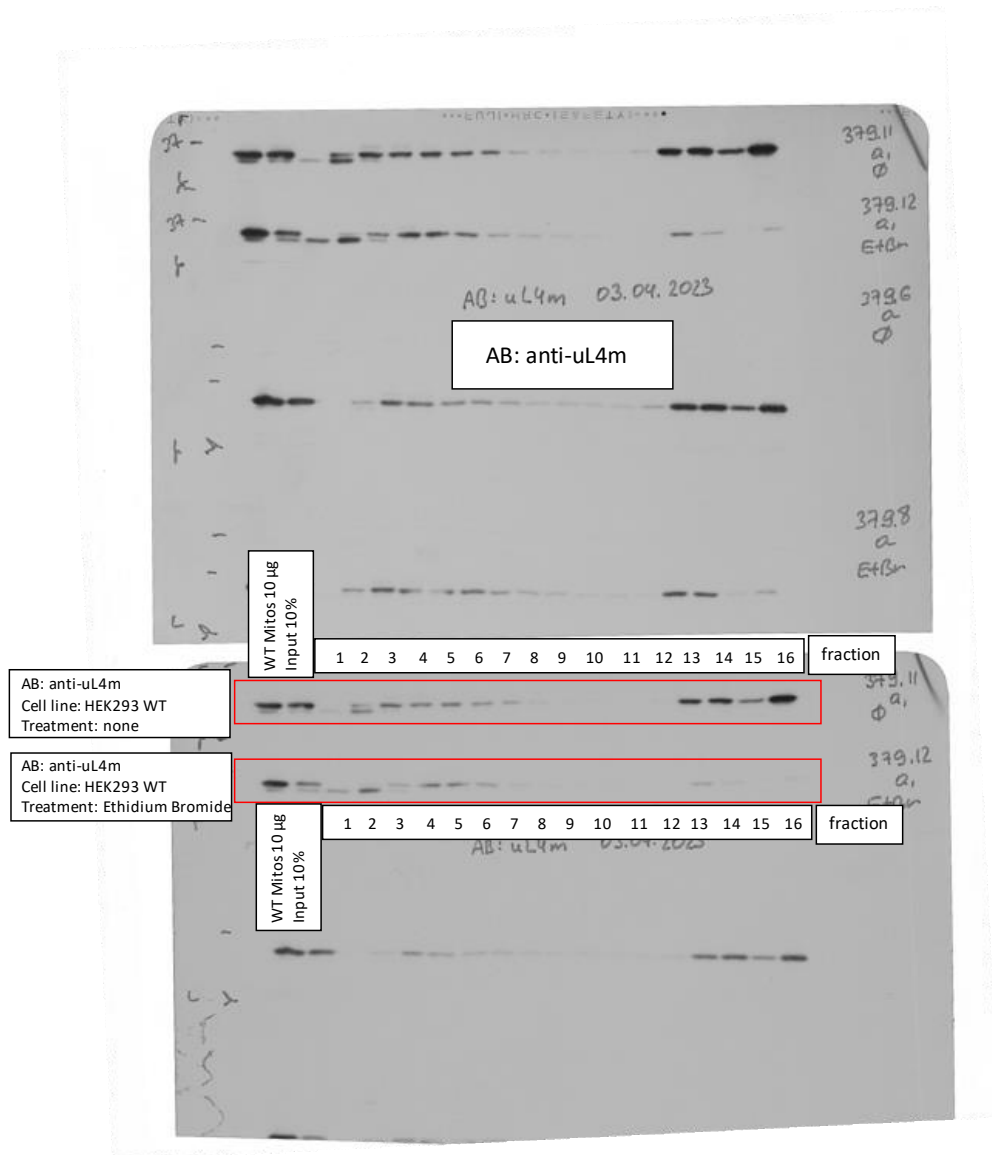

Source Data 5\_related to Extended Data Fig.9d  
 EL#405 HEK293 WT vs. HEK293 mL44 KO + Gradient  
 EL#409 HEK293 WT vs. HEK293 uL4m KO and bL20m KO  
 Rotor: SW41 Ti  
 Gradient: Sucrose 5-30%  
 Speed: 158.000xg  
 Time: 15h

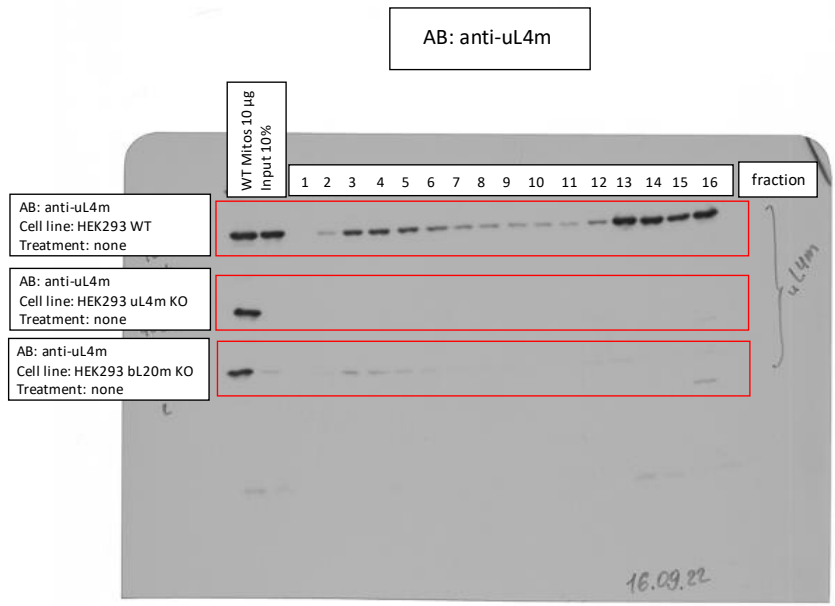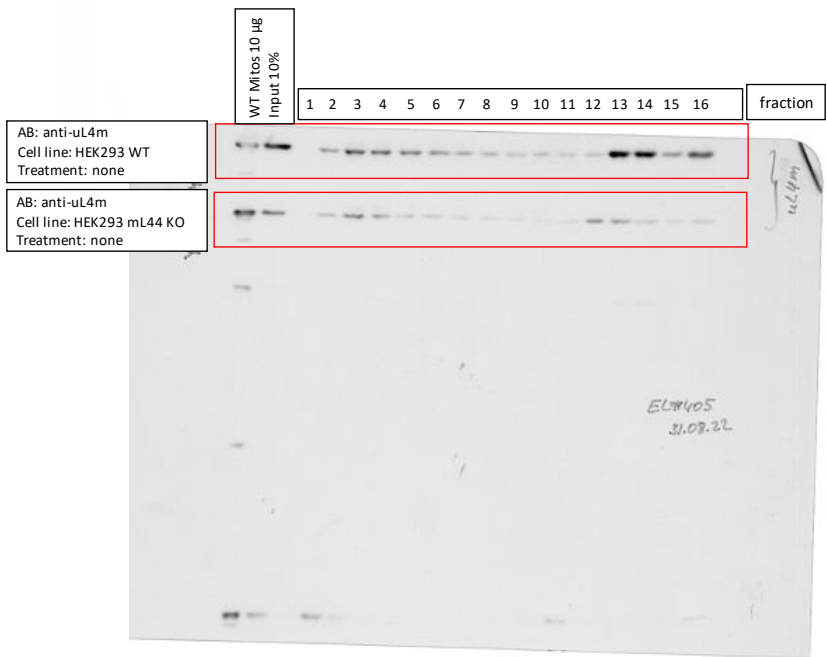

Source Data 5\_related to Extended Data Fig.9d  
 EL#405 HEK293 WT vs. HEK293 mL44 KO + Gradient  
 EL#409 HEK293 WT vs. HEK293 uL4m KO and bL20m KO  
 Rotor: SW41 Ti  
 Gradient: Sucrose 5-30%  
 Speed: 158.000xg  
 Time: 15h

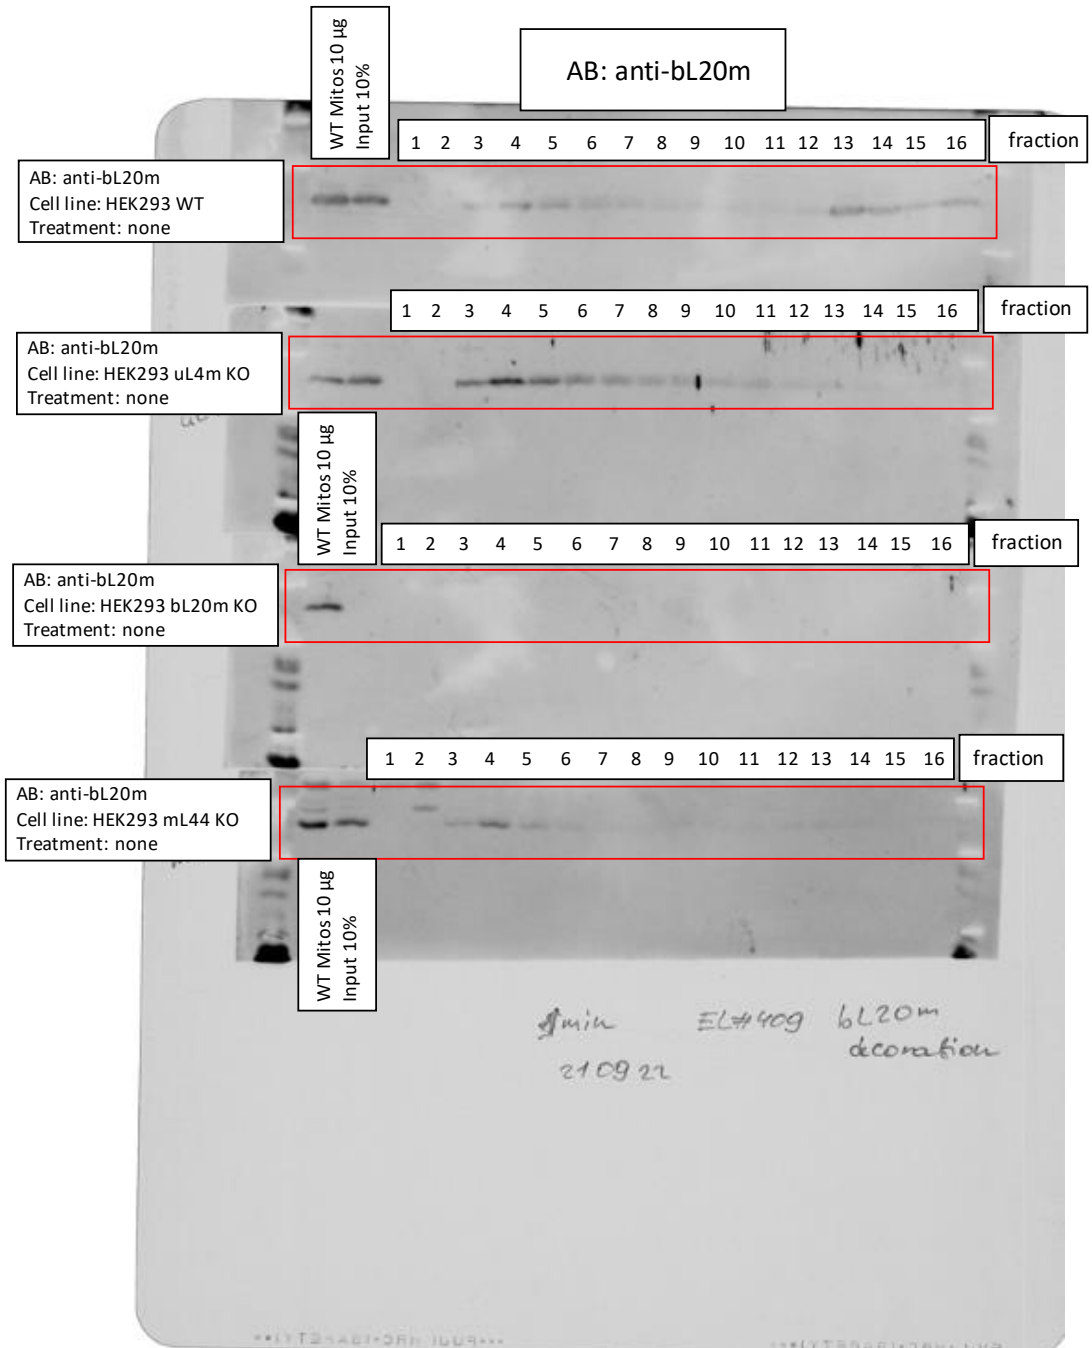

Source Data 5\_related to Extended Data Fig.9d  
 EL#405 HEK293 WT vs. HEK293 mL44 KO + Gradient  
 EL#409 HEK293 WT vs. HEK293 uL4m KO and bL20m KO  
 Rotor: SW41 Ti  
 Gradient: Sucrose 5-30%  
 Speed: 158.000xg  
 Time: 15h

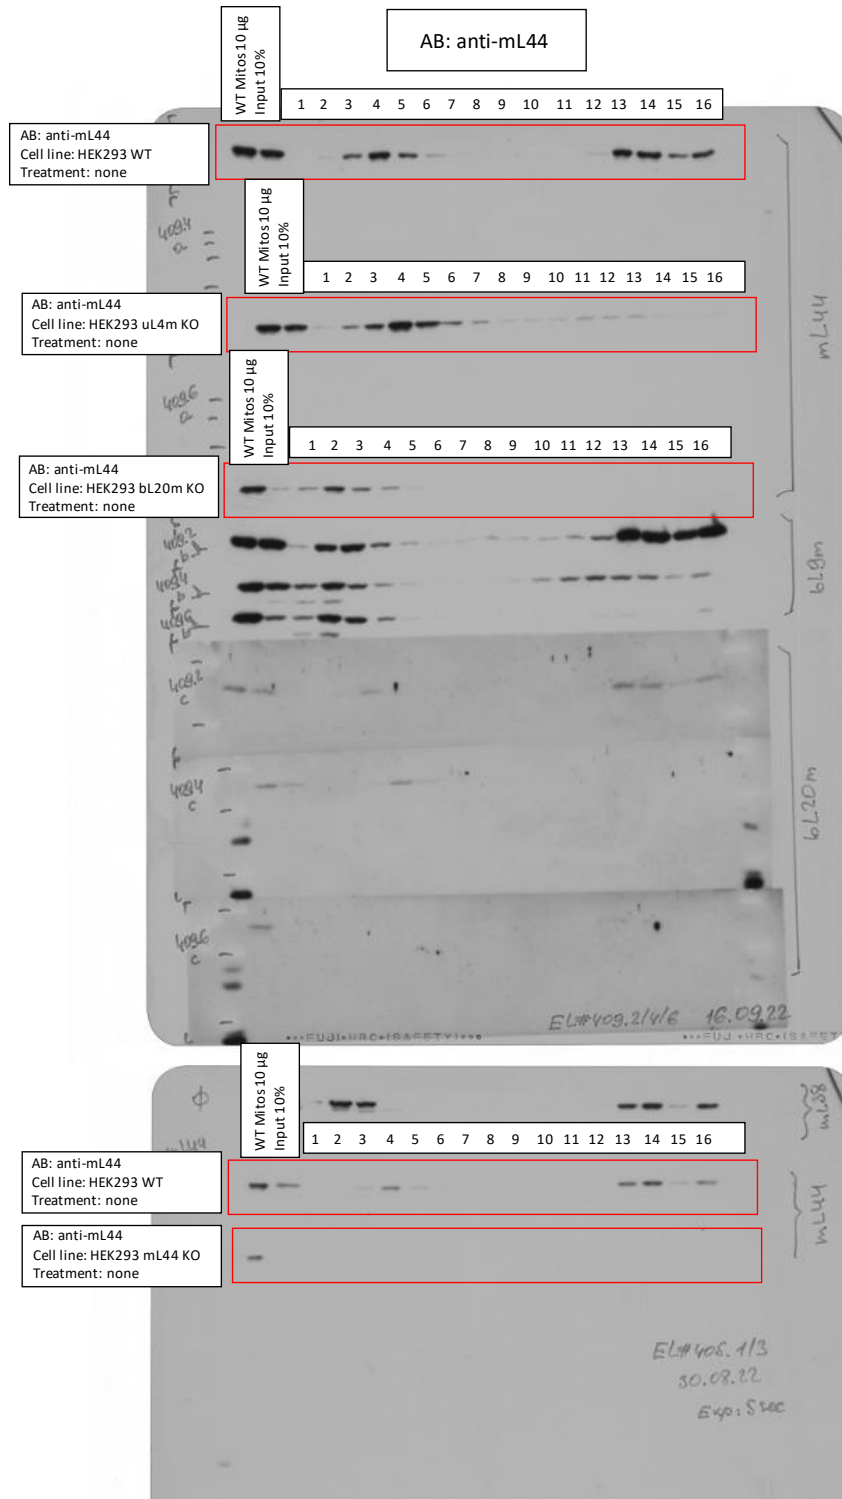

Source Data 5\_related to Extended Data Fig.9d  
 EL#405 HEK293 WT vs. HEK293 mL44 KO + Gradient  
 EL#409 HEK293 WT vs. HEK293 uL4m KO and bL20m KO  
 Rotor: SW41 Ti  
 Gradient: Sucrose 5-30%  
 Speed: 158.000xg  
 Time: 15h

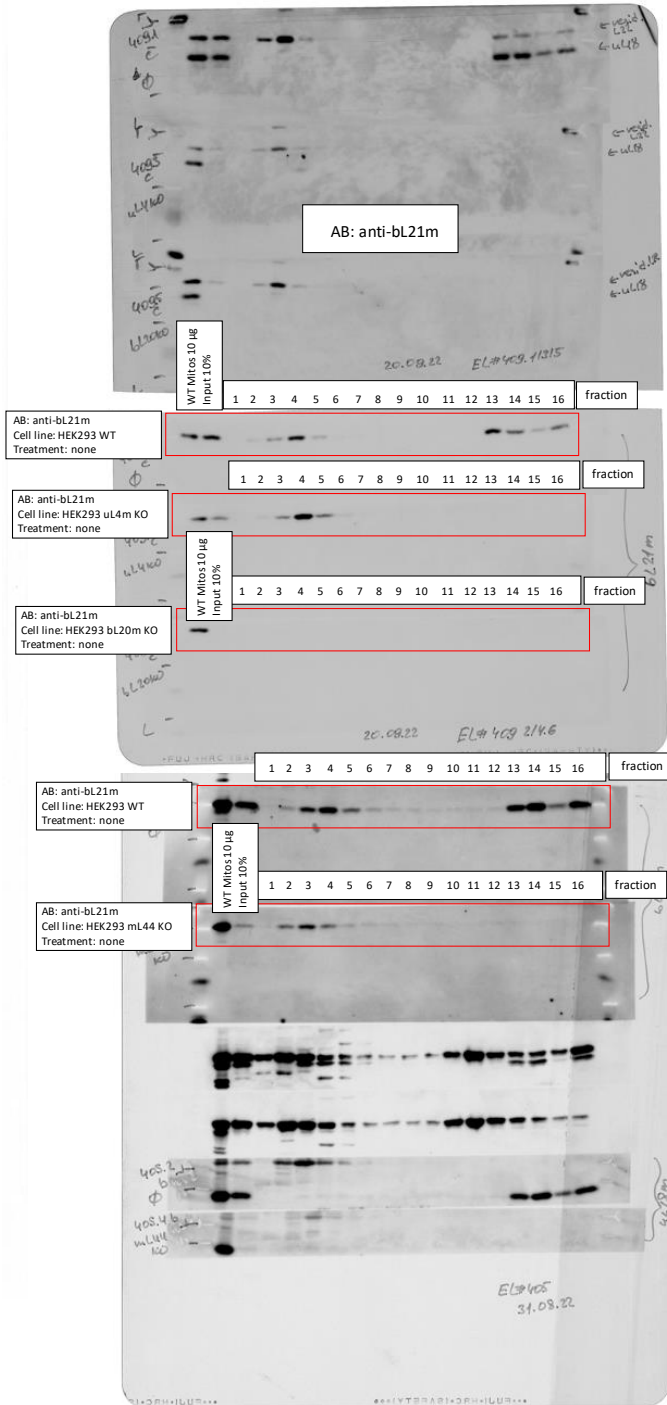

Source Data 5\_related to Extended Data Fig.9d  
 EL#405 HEK293 WT vs. HEK293 mL44 KO + Gradient  
 EL#409 HEK293 WT vs. HEK293 uL4m KO and bL20m KO  
 Rotor: SW41 Ti  
 Gradient: Sucrose 5-30%  
 Speed: 158.000xg  
 Time: 15h

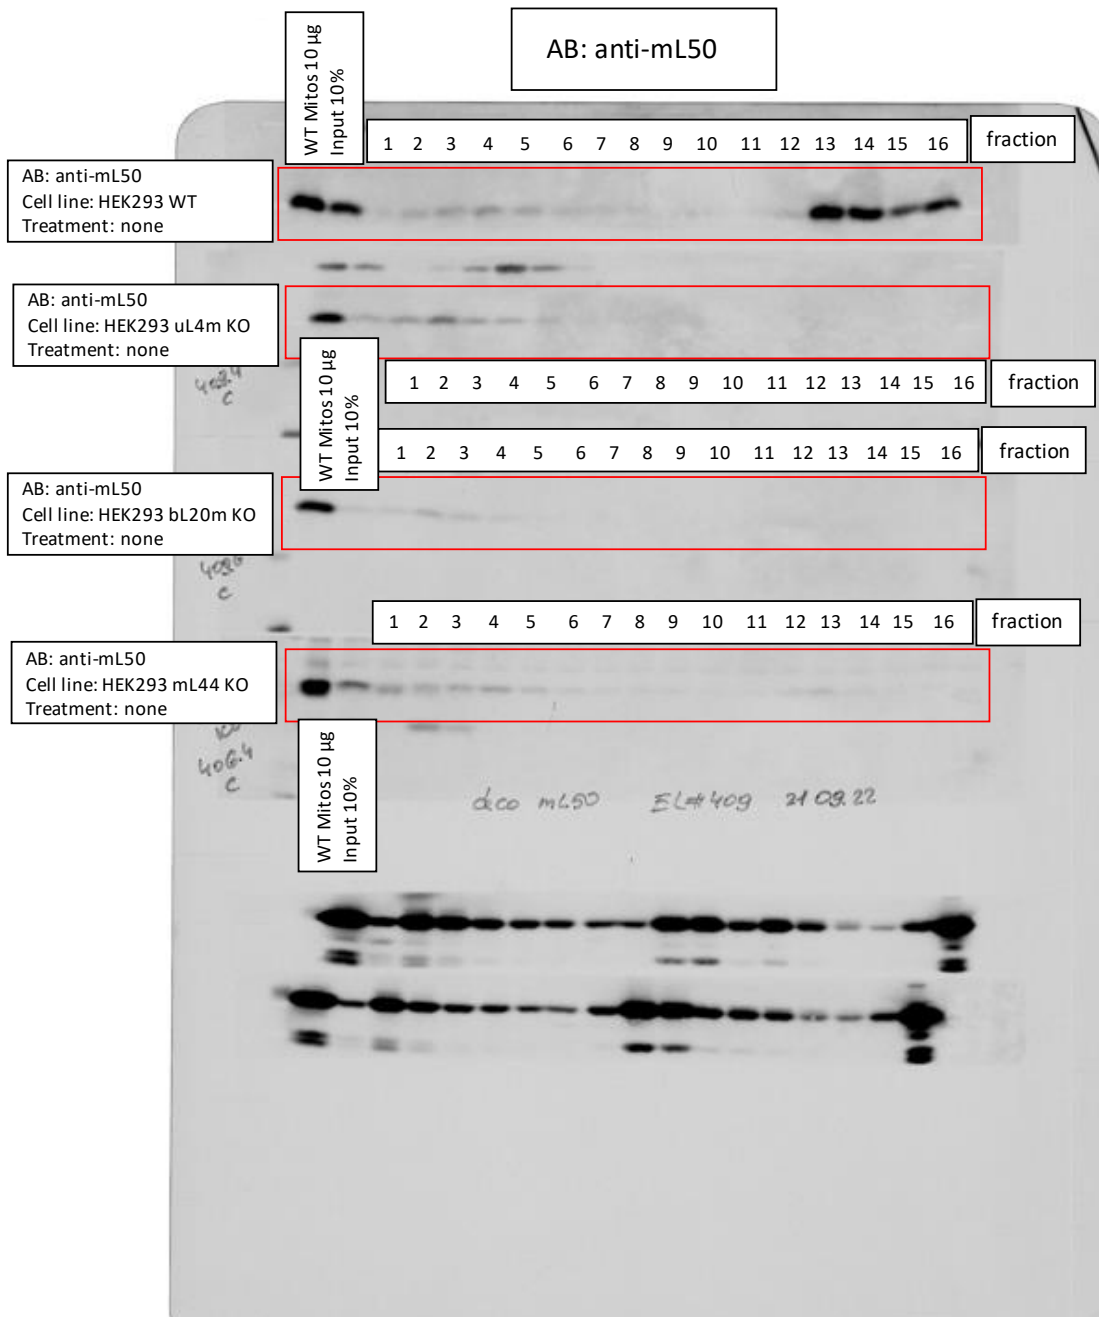



Source Data 5\_related to Extended Data Fig.9d  
 EL#405 HEK293 WT vs. HEK293 mL44 KO + Gradient  
 EL#409 HEK293 WT vs. HEK293 uL4m KO and bL20m KO  
 Rotor: SW41 Ti  
 Gradient: Sucrose 5-30%  
 Speed: 158.000xg  
 Time: 15h

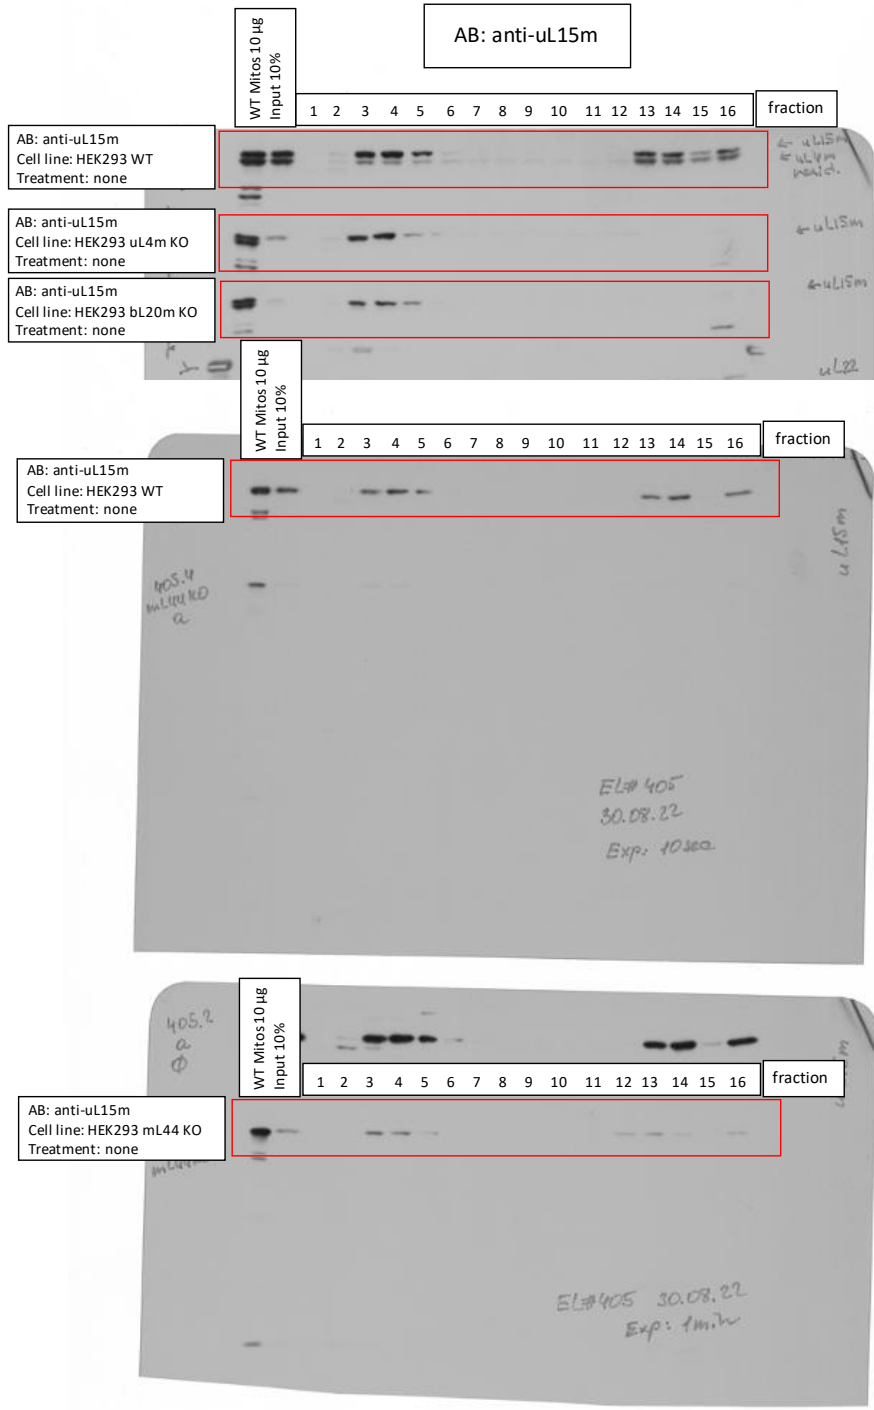

Source Data 5\_related to Extended Data Fig.9d  
 EL#405 HEK293 WT vs. HEK293 mL44 KO + Gradient  
 EL#409 HEK293 WT vs. HEK293 uL4m KO and bL20m KO  
 Rotor: SW41 Ti  
 Gradient: Sucrose 5-30%  
 Speed: 158.000xg  
 Time: 15h

AB: anti-mL43

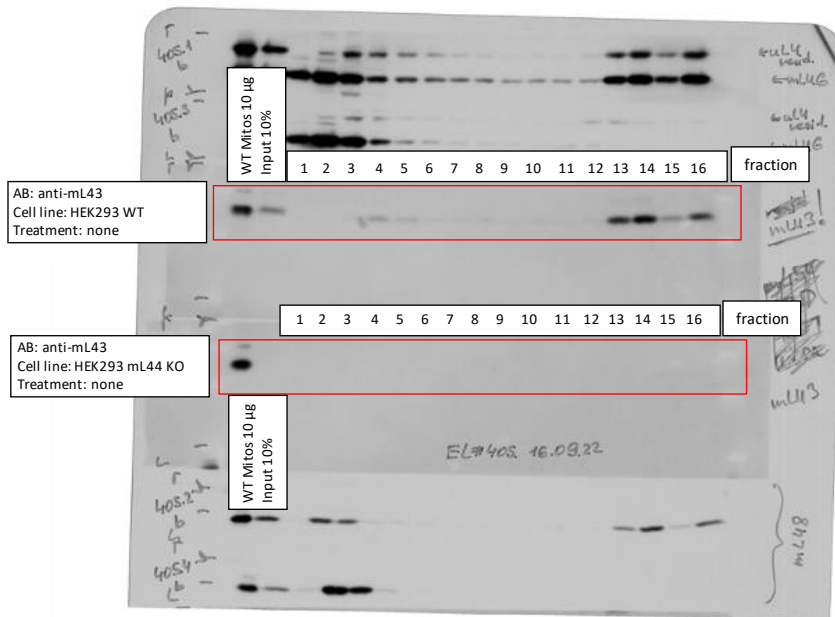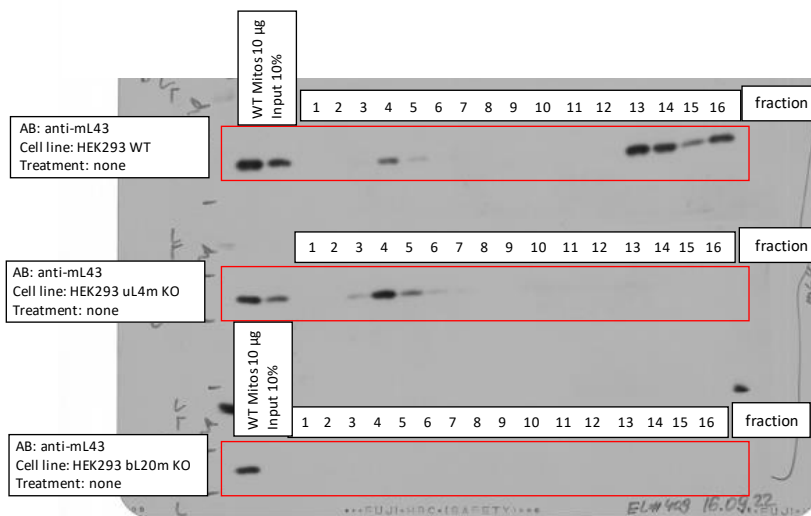

Source Data 5\_related to Extended Data Fig.9d  
 EL#405 HEK293 WT vs. HEK293 mL44 KO + Gradient  
 EL#409 HEK293 WT vs. HEK293 uL4m KO and bL20m KO  
 Rotor: SW41 Ti  
 Gradient: Sucrose 5-30%  
 Speed: 158.000xg  
 Time: 15h

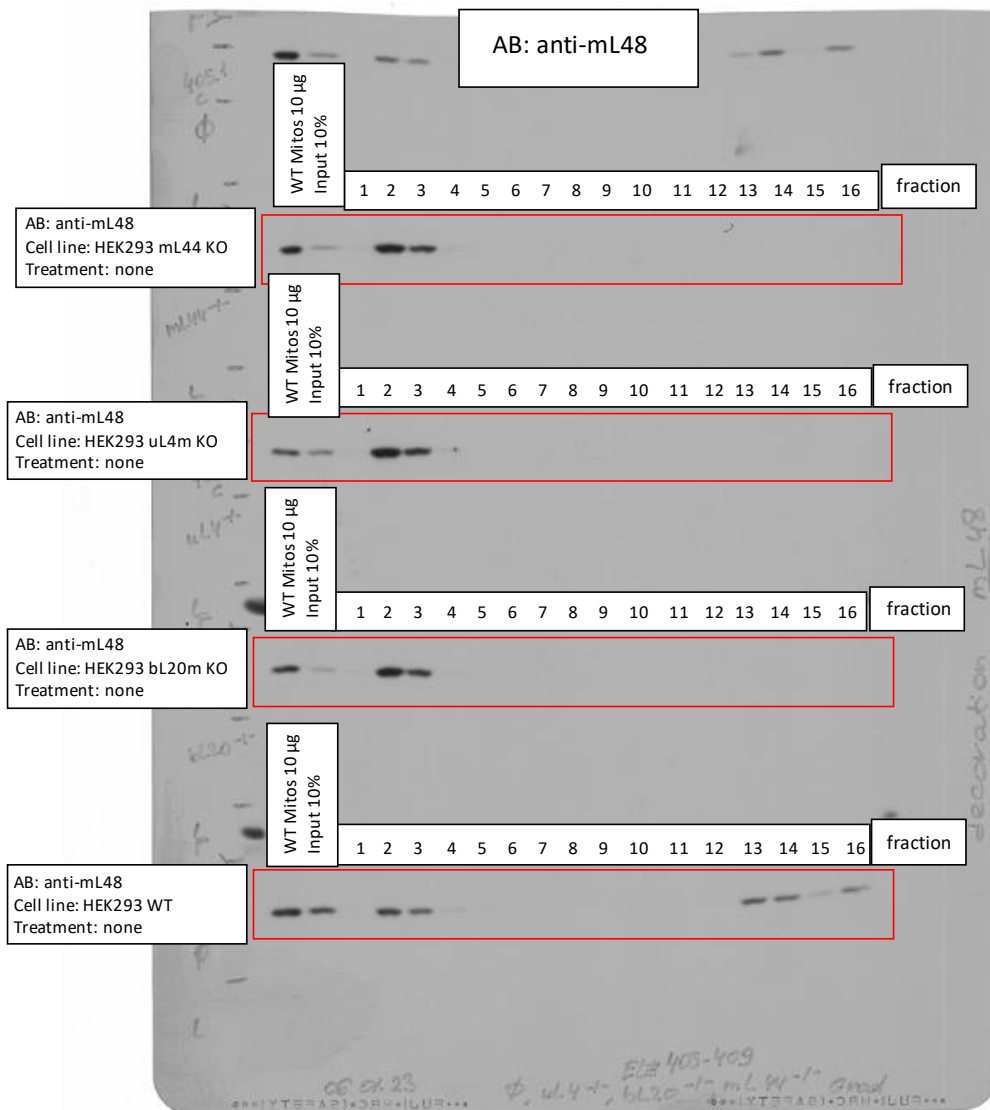

Source Data 5\_related to Extended Data Fig.9d  
 EL#405 HEK293 WT vs. HEK293 mL44 KO + Gradient  
 EL#409 HEK293 WT vs. HEK293 uL4m KO and bL20m KO  
 Rotor: SW41 Ti  
 Gradient: Sucrose 5-30%  
 Speed: 158.000xg  
 Time: 15h

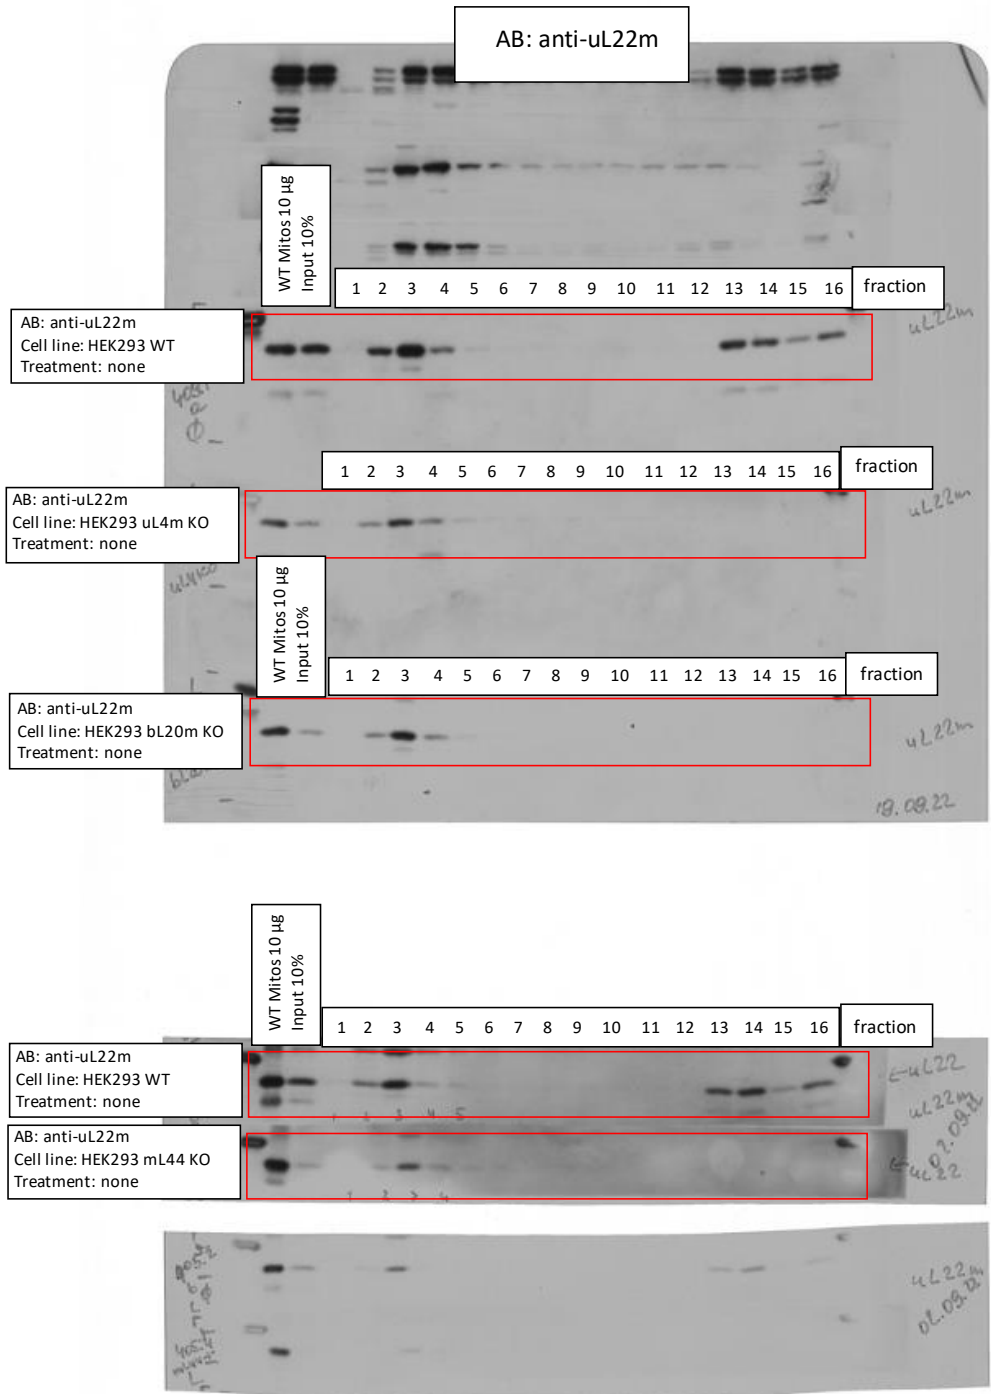

Source Data 5\_related to Extended Data Fig.9d  
 EL#405 HEK293 WT vs. HEK293 mL44 KO + Gradient  
 EL#409 HEK293 WT vs. HEK293 uL4m KO and bL20m KO  
 Rotor: SW41 Ti  
 Gradient: Sucrose 5-30%  
 Speed: 158.000xg  
 Time: 15h

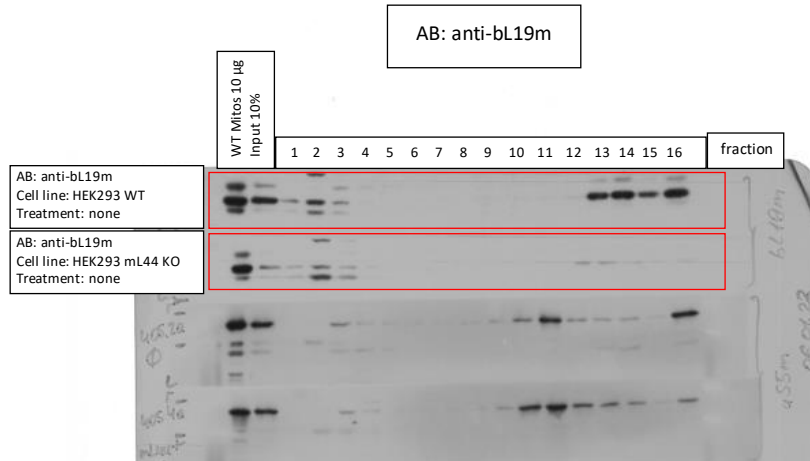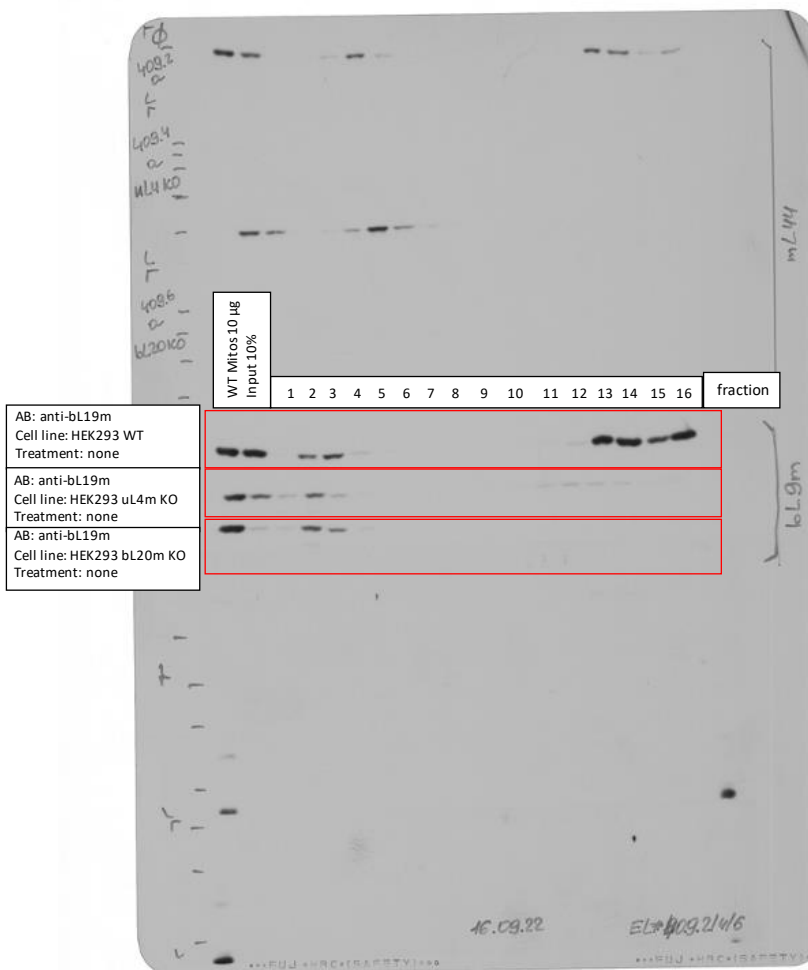

Source Data 5\_related to Extended Data Fig.9d  
 EL#405 HEK293 WT vs. HEK293 mL44 KO + Gradient  
 EL#409 HEK293 WT vs. HEK293 uL4m KO and bL20m KO  
 Rotor: SW41 Ti  
 Gradient: Sucrose 5-30%  
 Speed: 158.000xg  
 Time: 15h

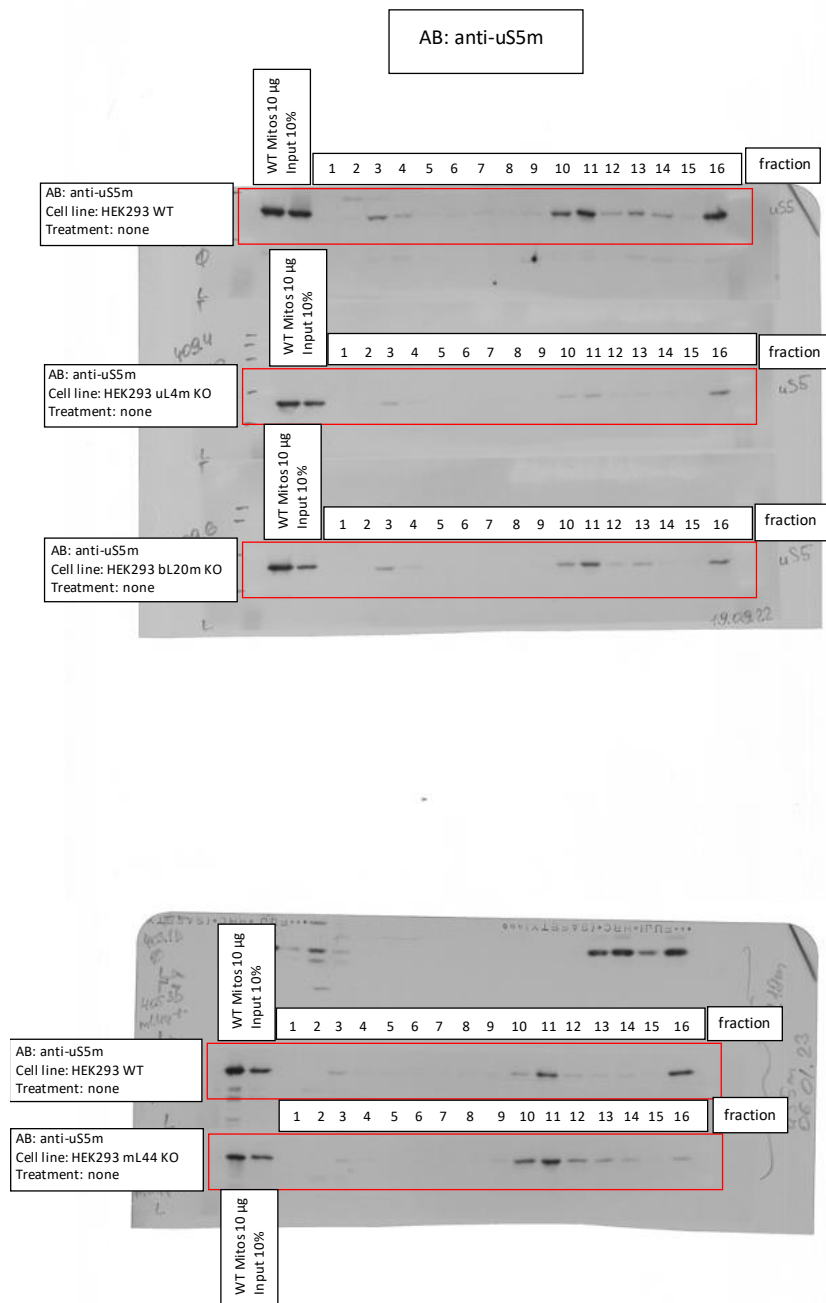

Supplement: 41594_2024_1356_MOESM26_ESM.pdf [file 41594_2024_1356_MOESM26_ESM.pdf]
