# Supplementary material for: A roadmap for ribosome assembly in human mitochondria
Source: PubMed Central journal article supplement (PMC11638073; doi:10.1038/s41594-024-01356-w), 2024-07-11
Supplement: 41594_2024_1356_MOESM1_ESM.pdf [file 41594_2024_1356_MOESM1_ESM.pdf]

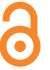

---

# A roadmap for ribosome assembly in human mitochondria

---

In the format provided by the authors and unedited

---

## Supplementary information

### Supplementary Figures

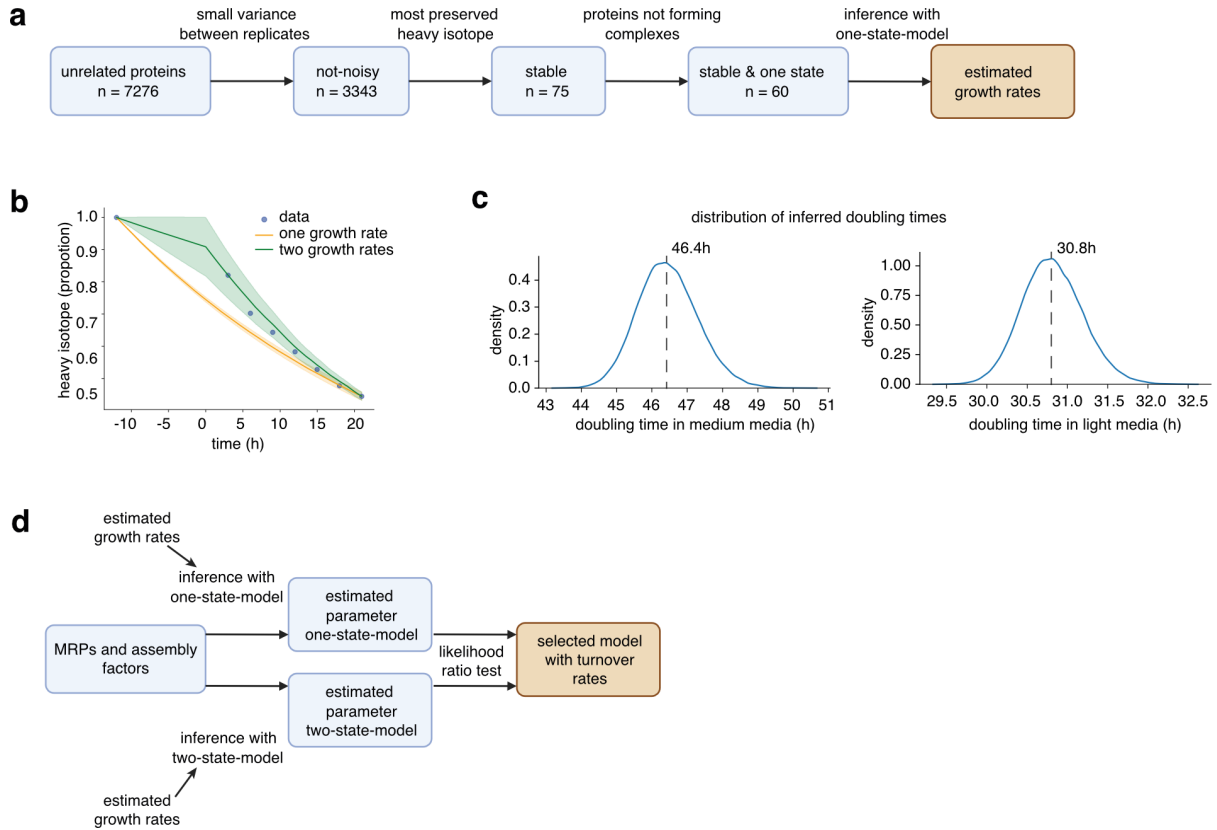

**Supplementary Fig.1|Workflow for inference of global intracellular turnover of MRPs and mitoribosome assembly factors. a**, Estimation of the cell growth rate. Unrelated proteins, *i.e.* proteins that are not MRPs or their assembly factors, were filtered by variance between replicates, value of “heavy” isotope in the late time-points (18 and 21 h) and complex formation to get stable one state proteins with reliable data. These proteins were model using one-state-model to infer cell growth rate in the “medium” and in the “light” media. **b**, Medians of the “heavy” isotope derived from selected proteins in (a, indicated as dots) compared to inference results using one growth rate (based on 21 h time point) and using two growth rates (based on 3 and 21 h time point). Solid lines indicate median and shaded areas indicate 5%-ile and 95%-ile of model fits. **c**, Distribution of inferred cell doubling times (directly related to the cell growth rates). Vertical line represents the median of the distribution, value used for the subsequent modelling of MRPs and assembly factors. **d**, Schema of modelling of MRPs and assembly factors. Proteins were modelled with both one-state-model and two-state-model using the previously inferred cell growth rates. Likelihood ratio test was used to select the more likely model for every protein.

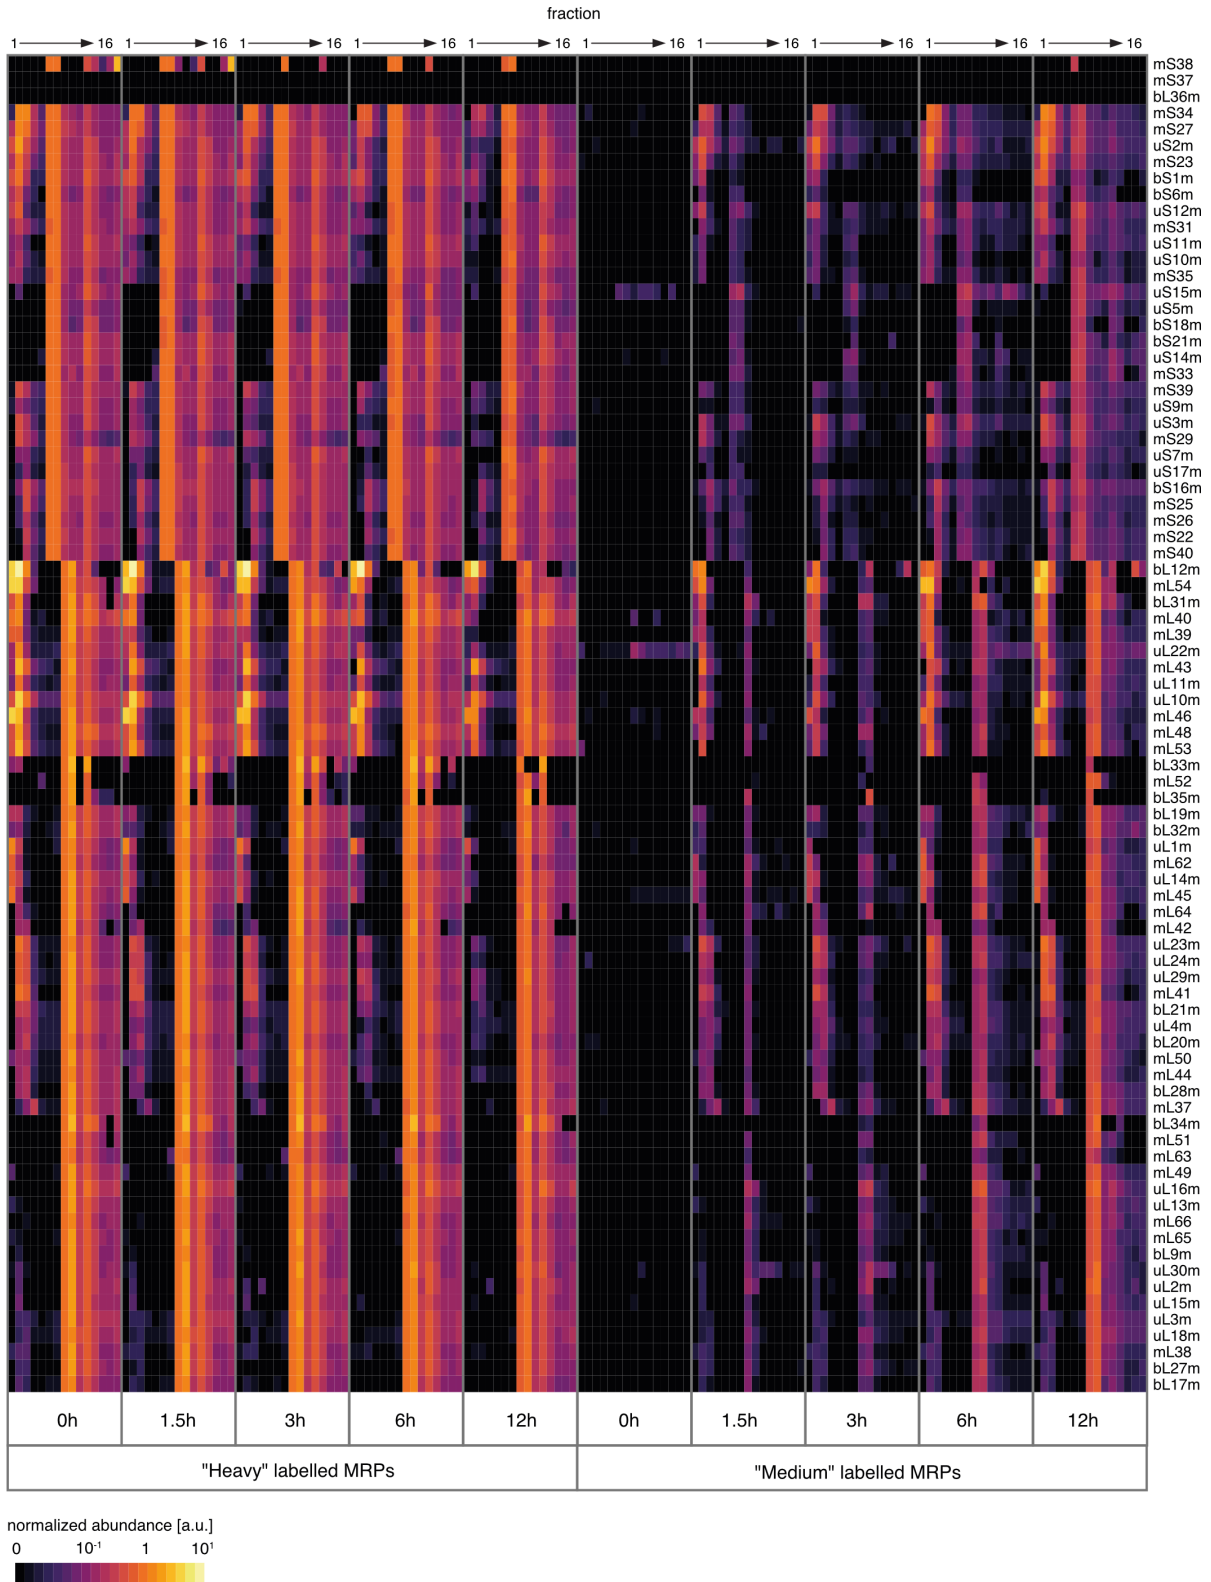

**Supplementary Fig.2|Normalized abundance of “heavy” and “medium” labelled MRP across sucrose gradient fractions for five collected time points (0 h-12 h).** The abundance of “heavy” and “medium” labelled MRPs is indicated as a range from black (zero) to light yellow (maximal value). MRPs are arranged based on hierarchical clustering of “heavy” and “medium” labelled protein abundances across all sucrose gradient fractions and time points.

Determination of abundance and flux in each fraction for each protein (example: uS2m)

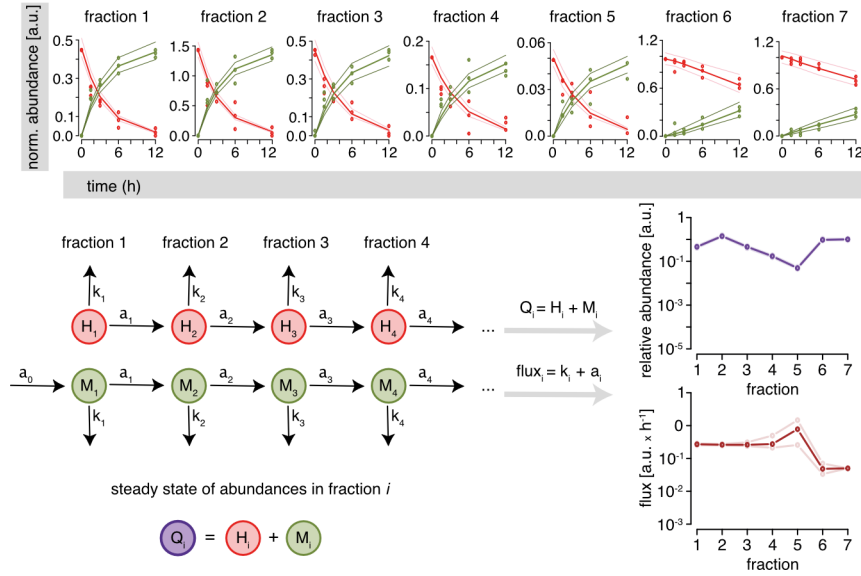

**Supplementary Fig.3| Inference of steady state abundance and fluxes.** As an example, normalized abundance of uS2m is depicted for fractions 1-7 over time. Dots represent individual data points of the biological replicates and lines represent median and confidence ranges of flux model fits, where “heavy” labelled uS2m is depicted in red and “medium” labelled uS2m is depicted in green. The flux model describes the turnover ( $k$ ) of MRPs in each fraction as well as the MRP transfer across fractions ( $a$ ). H = “heavy”, M = “medium”, Q = steady state abundance,  $a$  = integration rate,  $k$  = turnover rate.



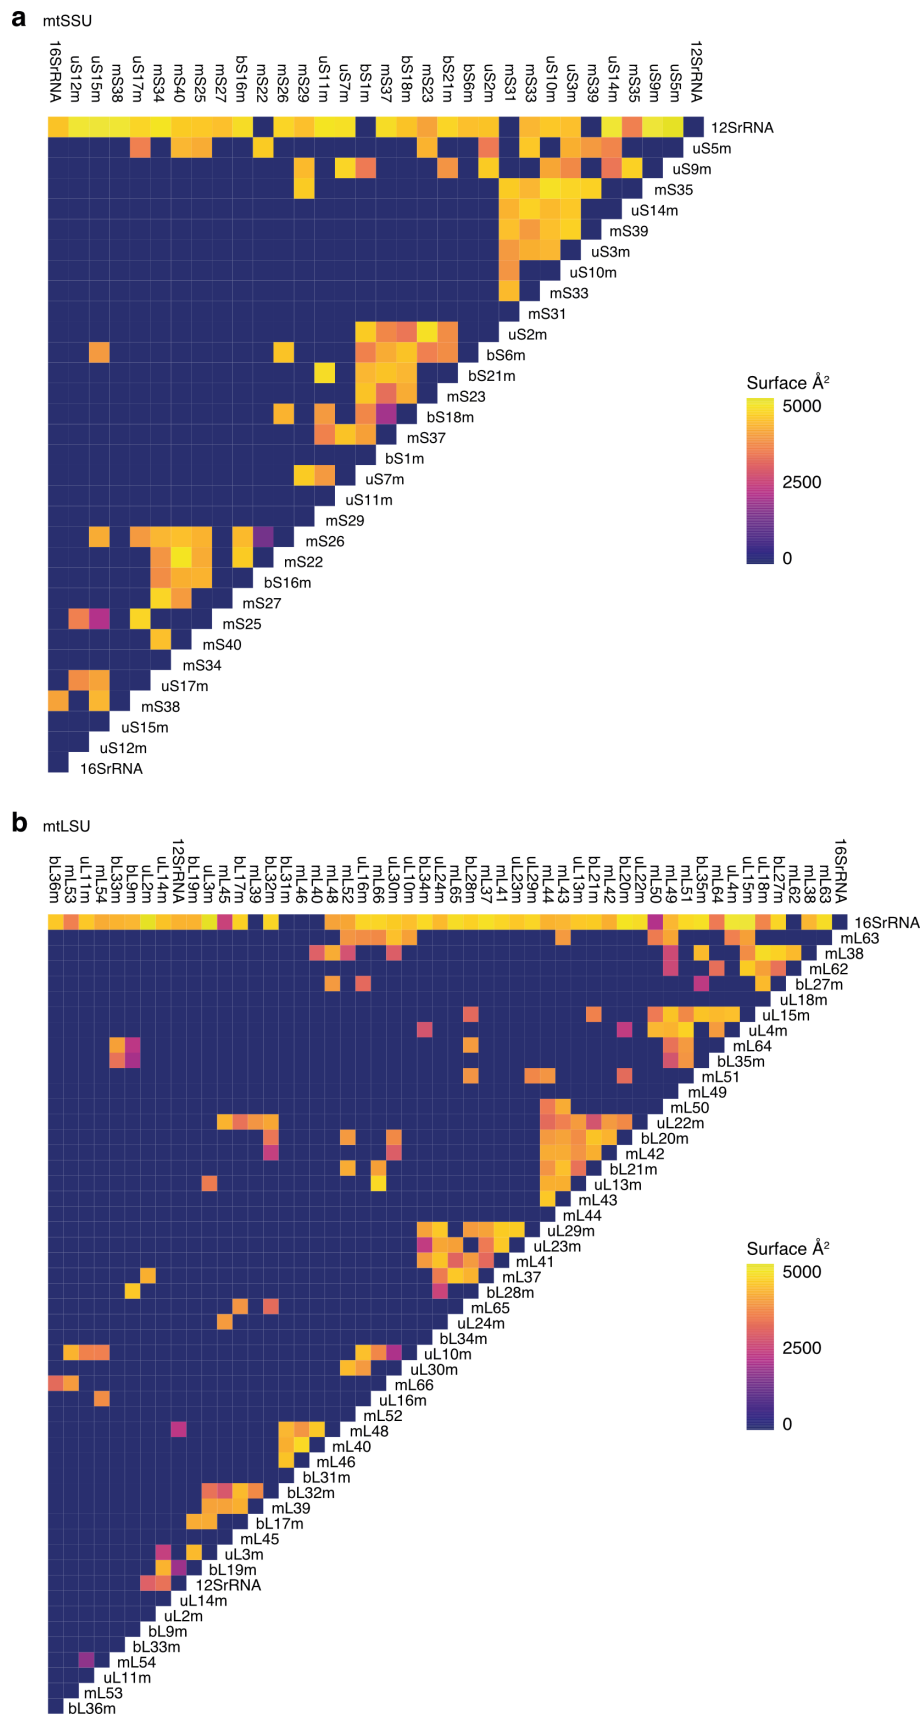

**Supplementary Fig.4|Contact matrix of the mtLSU (a) and mtSSU (b).** Contact matrix shows the pairwise contact surface area between two MRPs, as well as between MRPs and RNAs, computed based on the structure PDB 6zm6 using the software PDBEPIA. The contact surface area of MRPs is indicated as a range from blue (minimal value) to light yellow (maximal value).

cluster distance within sub-modules

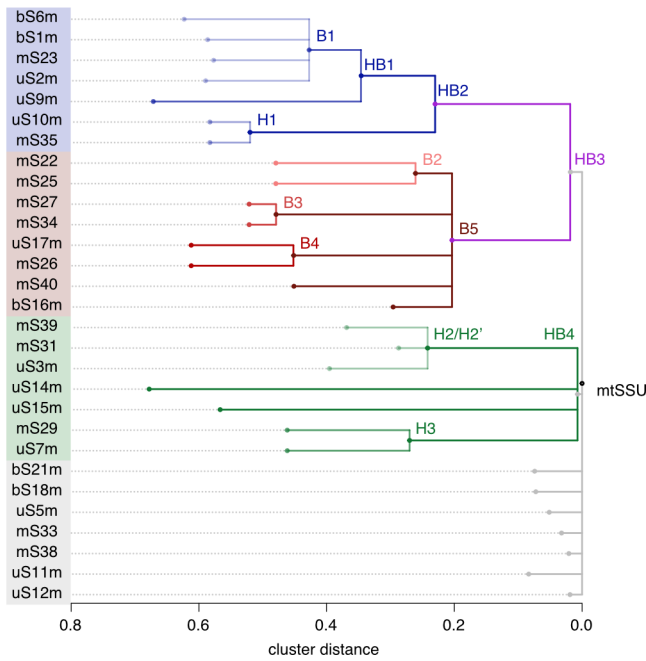

**Supplementary Fig.5|Assembly module similarity of mtSSU.** Dendrogram illustrates the mtSSU assembly pathway, where the distance between a MRP node and a module node indicates the distance between the flux and abundance of the MRP compared to the mean of the fluxes and abundances of all MRPs assigned to the module. Hence, the larger the distance,  $d$ , the more divergent was the MRP from its assigned module. Accordingly, the distance between two module nodes, indicates the distance between the average flux and abundance of the smaller module compared to the average of the fluxes and abundances of the larger module.

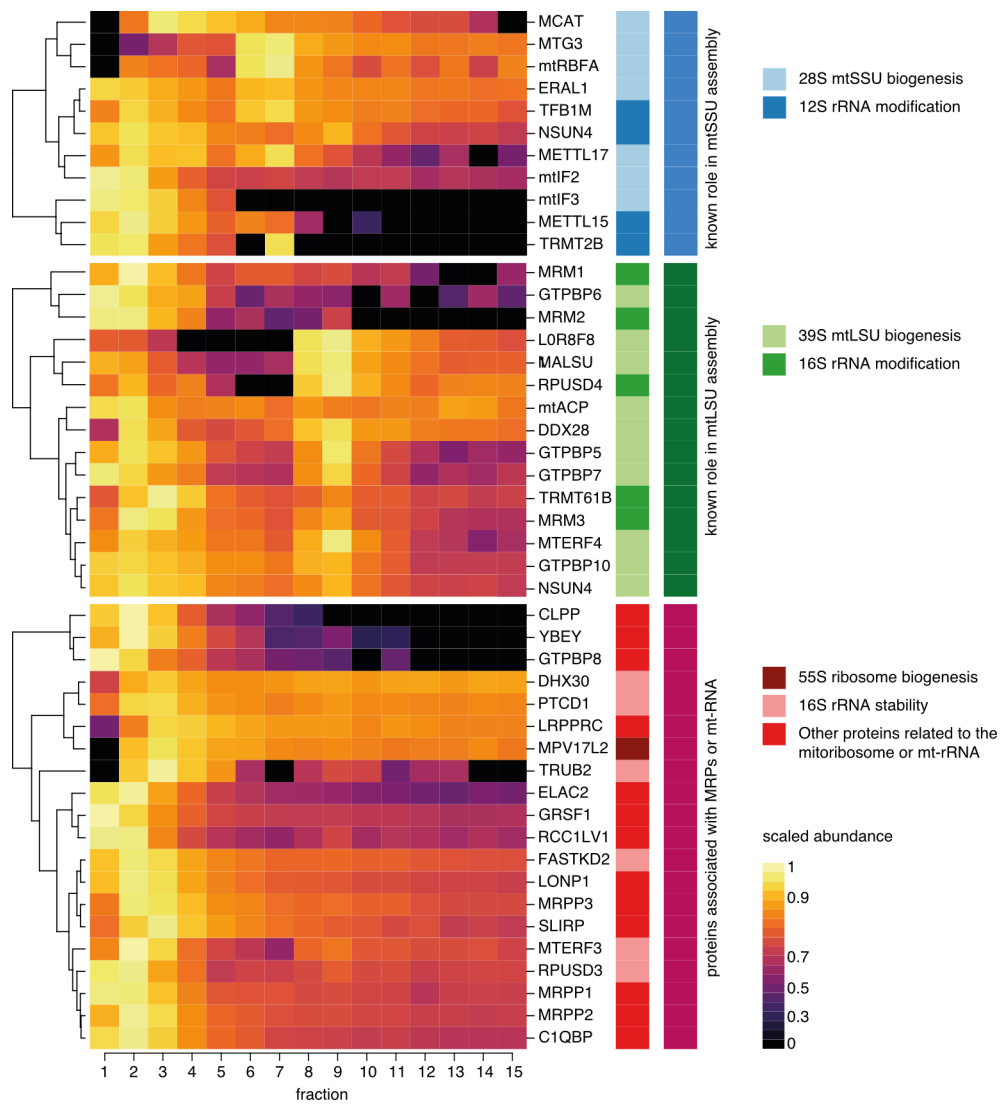

**Supplementary Fig.6|Abundance of assembly factors and mitoribosome-associated proteins across gradient fractions.** Proteins are grouped based on their known function into “known role in mtSSU assembly”, “known role in mtLSU assembly” and “proteins associated with MRPs or mtRNA”. Within each group, proteins are arranged based on hierarchical clustering of scaled abundances across all sucrose gradient fractions.

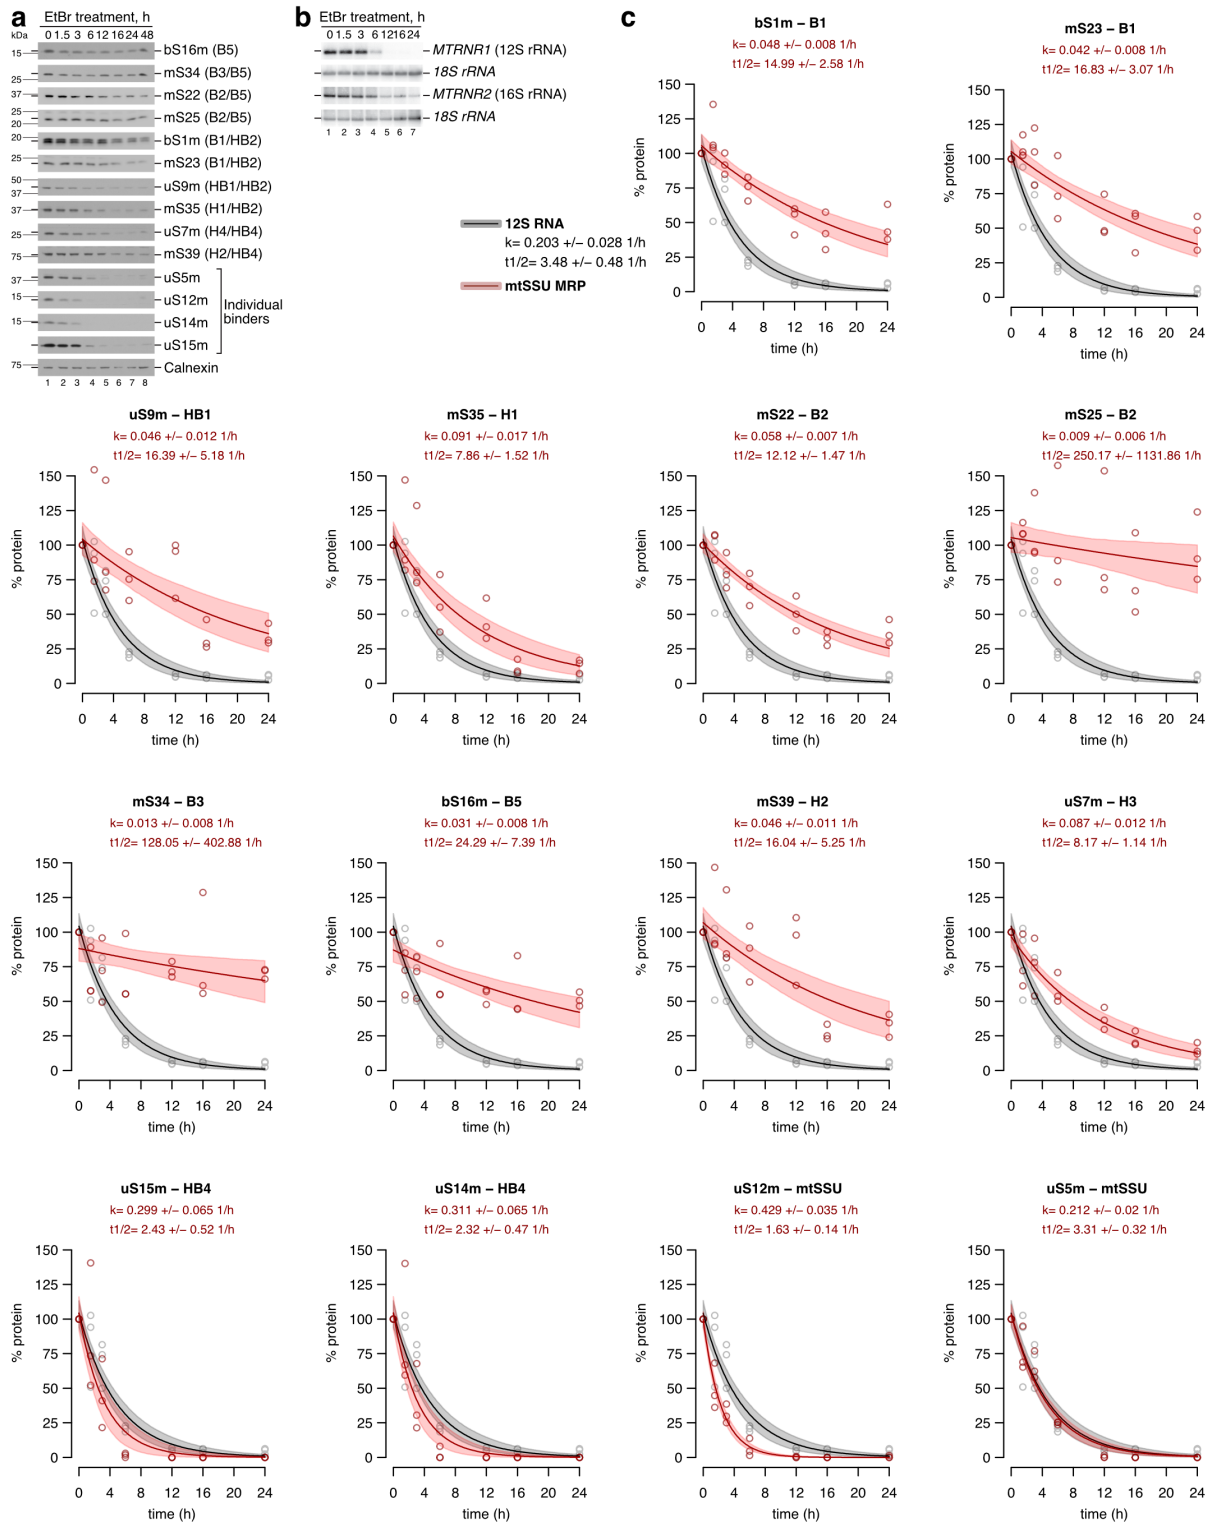

**Supplementary Fig.7|Formation of assembly modules is independent of the presence of rRNA – inference of decay rates.** **a**, Western blot analysis of the MRPs stability upon mt-rRNA depletion. HEK293 WT cells were induced with  $0.25 \mu\text{g/mL}$  of ethidium bromide and harvested after indicated time intervals. MRPs were detected using indicated antibodies. Calnexin was used as a loading control. **b**, Monitoring of the mt-rRNA decay upon inhibition of mitochondrial transcription. Cells were treated according to the scheme presented in **a**. Total RNA was isolated and the presence of mt-rRNAs were detected by northern blot with indicated probes. 18S cytosolic ribosomal rRNA was used as a loading control. **c**, MRPs decay rate upon repression of mt-rRNA synthesis by ethidium bromide. Plotted are relative MRP (red) and 12S rRNA (grey) abundance at indicated time points post-treatment as percentage of the starting abundance (time point 0 h). Exponential decay model was employed to

determine decay rates ( $k$ ) and half-life ( $t_{1/2}$ ) of MRPs and 12S RNA. Solid lines and shaded areas indicate the median and confidence ranges of the model fits, respectively. The title of each panel indicates MRP name and its corresponding first mtSSU module it associates with.

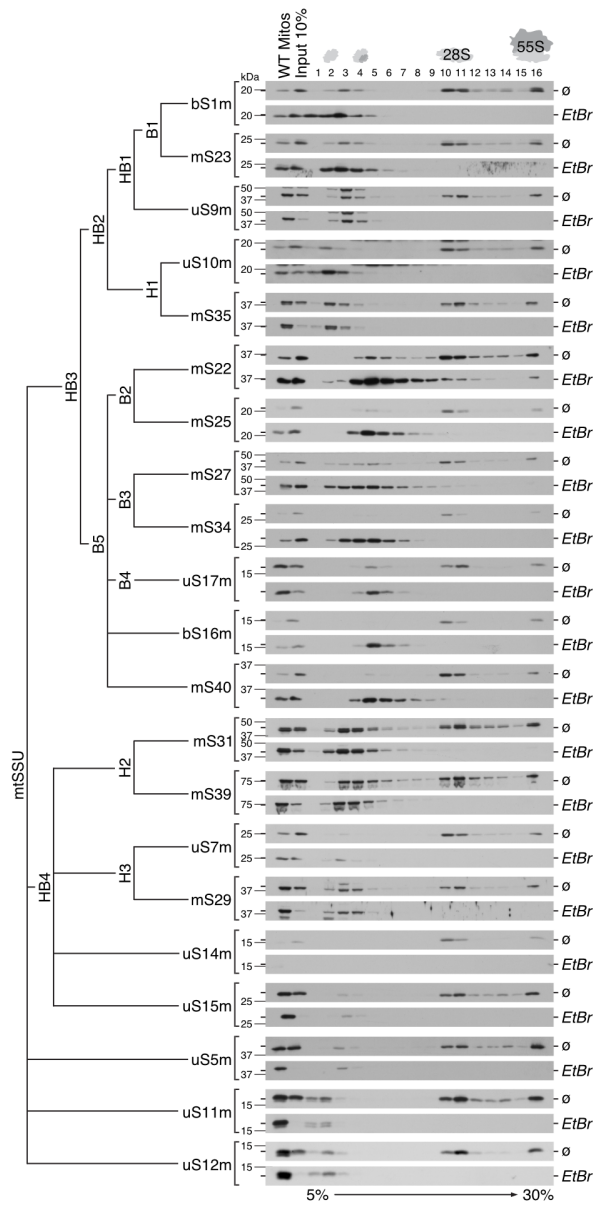

**Supplementary Fig.8|Formation of the mtSSU assembly clusters upon 12S mt-rRNA depletion.** Mitochondrial complexes isolated from ethidium bromide-treated (EtBr) or untreated cells ( $\emptyset$ ) were separated by sucrose gradient ultracentrifugation. H – mtSSU head; B – mtSSU body; HB – mtSSU head-body assembly module.

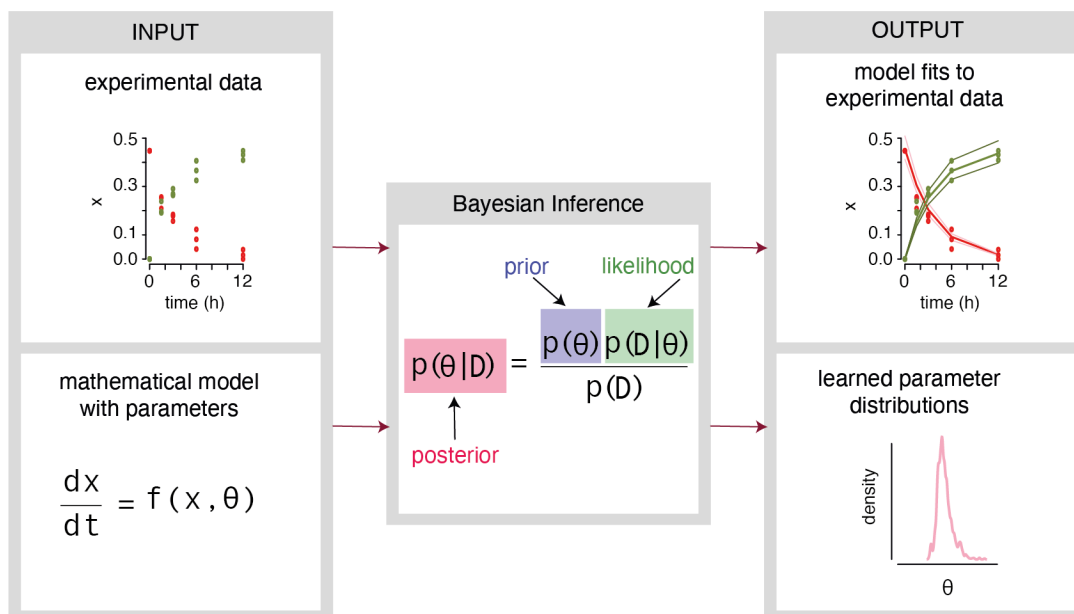

**Supplementary Fig.9|Bayesian inference schematic.** In order to derive kinetic parameter estimates (posterior distribution) of a mathematical model describing experimental data (input), Bayesian parameter inference can be employed. Here, the initial best guess of the parameters (prior distribution) is updated via the likelihood, which combines the data with the mathematical model, resulting in the posterior parameter distribution. Successful inference results in good agreement between model simulations and experimental data.

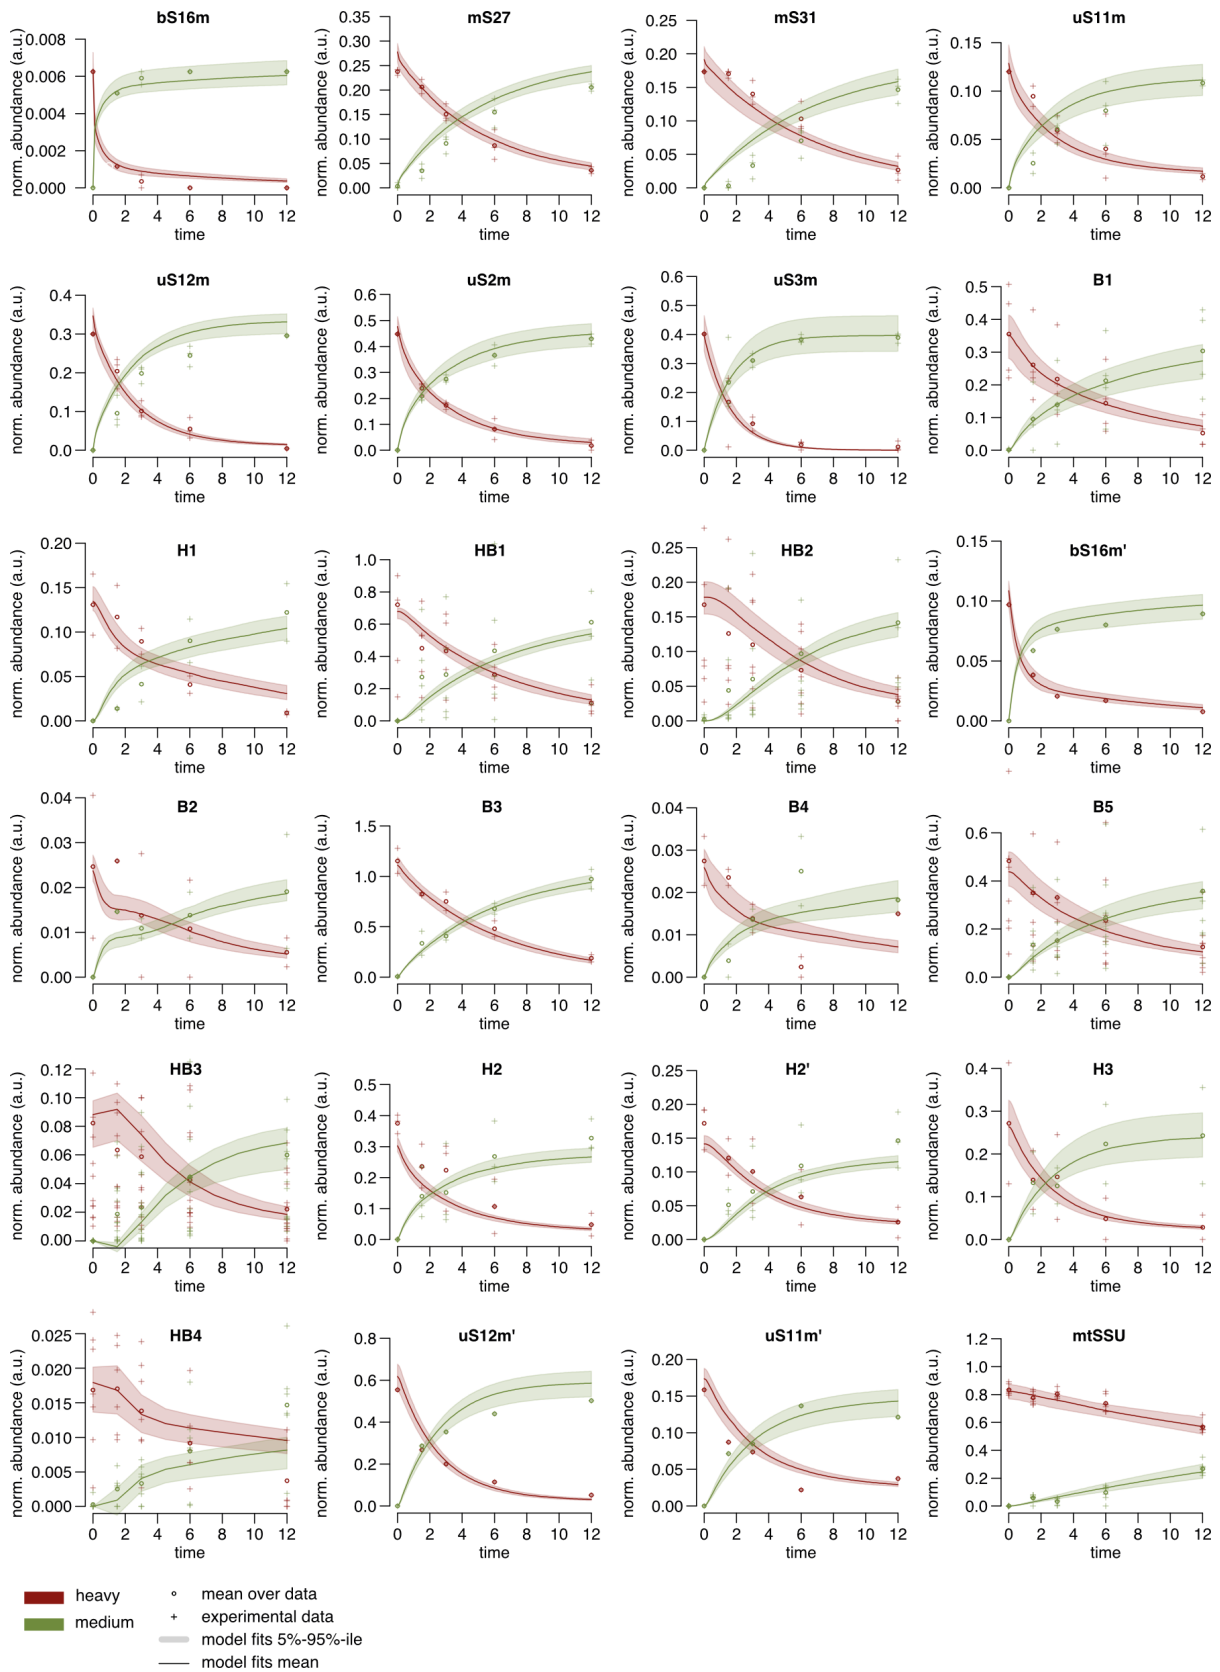

**Supplementary Fig.10|Experimental data and model fits for mtSSU assembly.** Shown is normalized abundance of “heavy” and “medium” labelled MRPs and mtSSU complexes (n=3 biological replicates). Model fits are obtained from posterior sample upon Bayesian inference. Solid lines indicate median and shaded areas indicate 5%-ile and 95%-ile of model fits.



**a** degradation rates - single mtSSU proteins

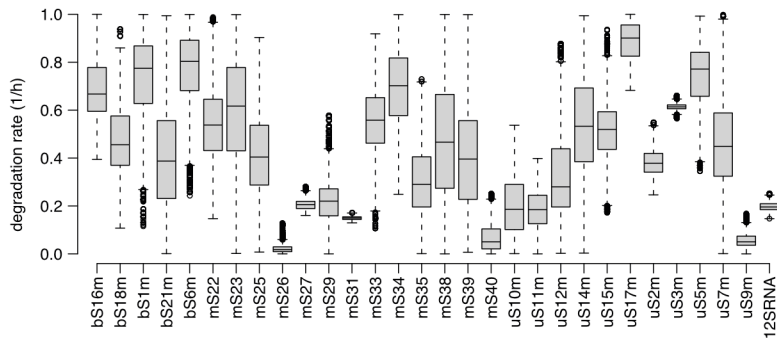

**b** degradation rates - mtSSU sub-complexes

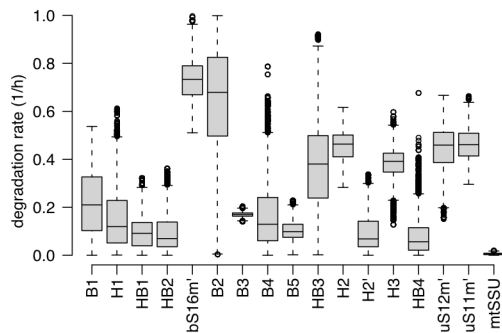

**c** binding rates - mtSSU sub-complexes

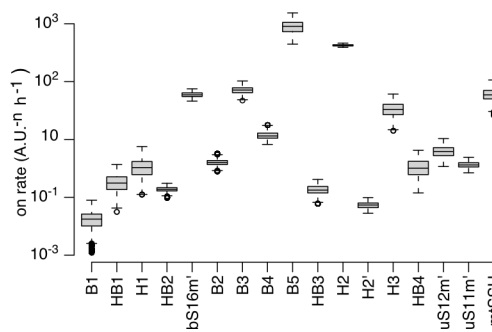

**d** unbinding rates - mtSSU sub-complexes

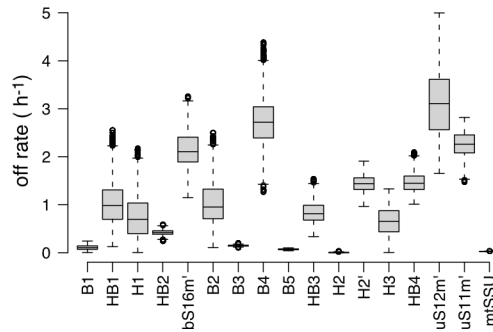

### Supplementary Fig.11| Kinetic rates of mtSSU assembly

**a-d**, Inferred kinetic rates of mtSSU assembly. Boxplots indicate median, 1st quartile, 3rd quartile, as well as minimum and maximum after outlier removal over the respective marginal posterior parameter distribution inferred based on  $n=3$  biological replicates. Outliers are indicated as dots. In (c)  $n$  indicates the order of the reaction (i.e. number of binding partners) - 1.

cluster distance within sub-modules

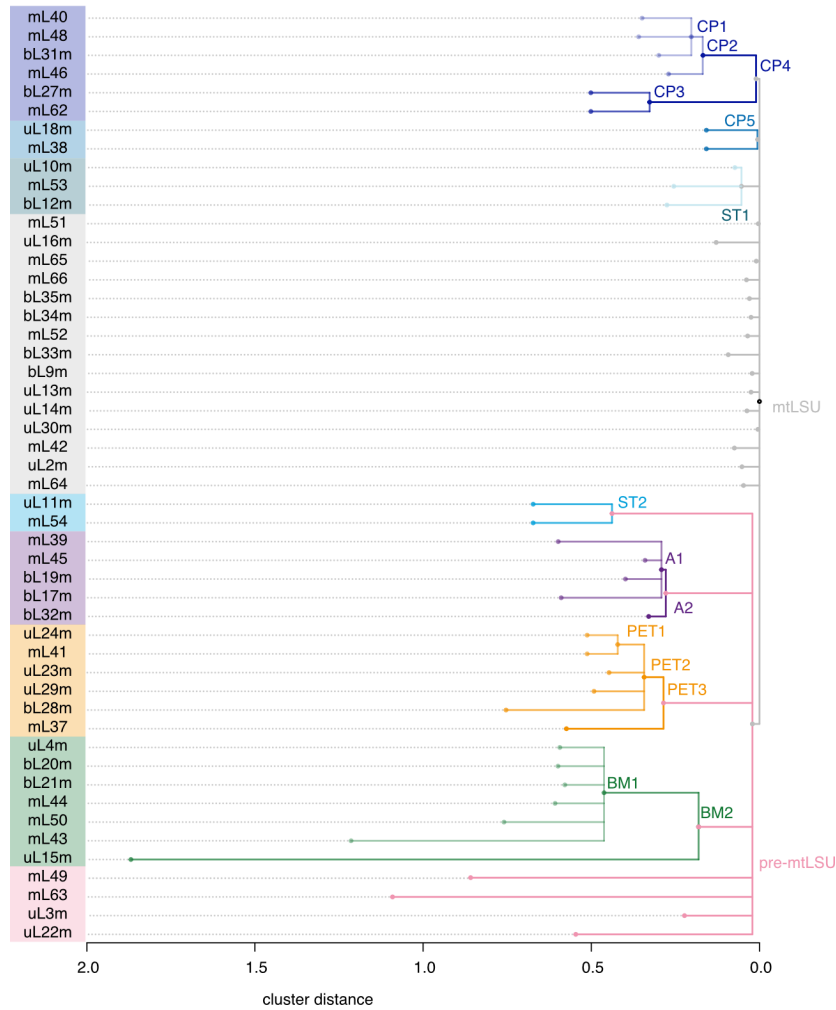

**Supplementary Fig.12| Assembly module similarity of mtLSU.** Dendrogram illustrates the mtLSU assembly pathway, where the distance between a MRP node and a module node indicates the distance between the flux and abundance of the MRP compared to the mean of the fluxes and abundances of all MRPs assigned to the module. Hence, the larger the distance,  $d$ , the more divergent was the MRP from its assigned module. Accordingly, the distance between two module nodes, indicates the distance between the average flux and abundance of the smaller module compared to the average of the fluxes and abundances of the larger module.

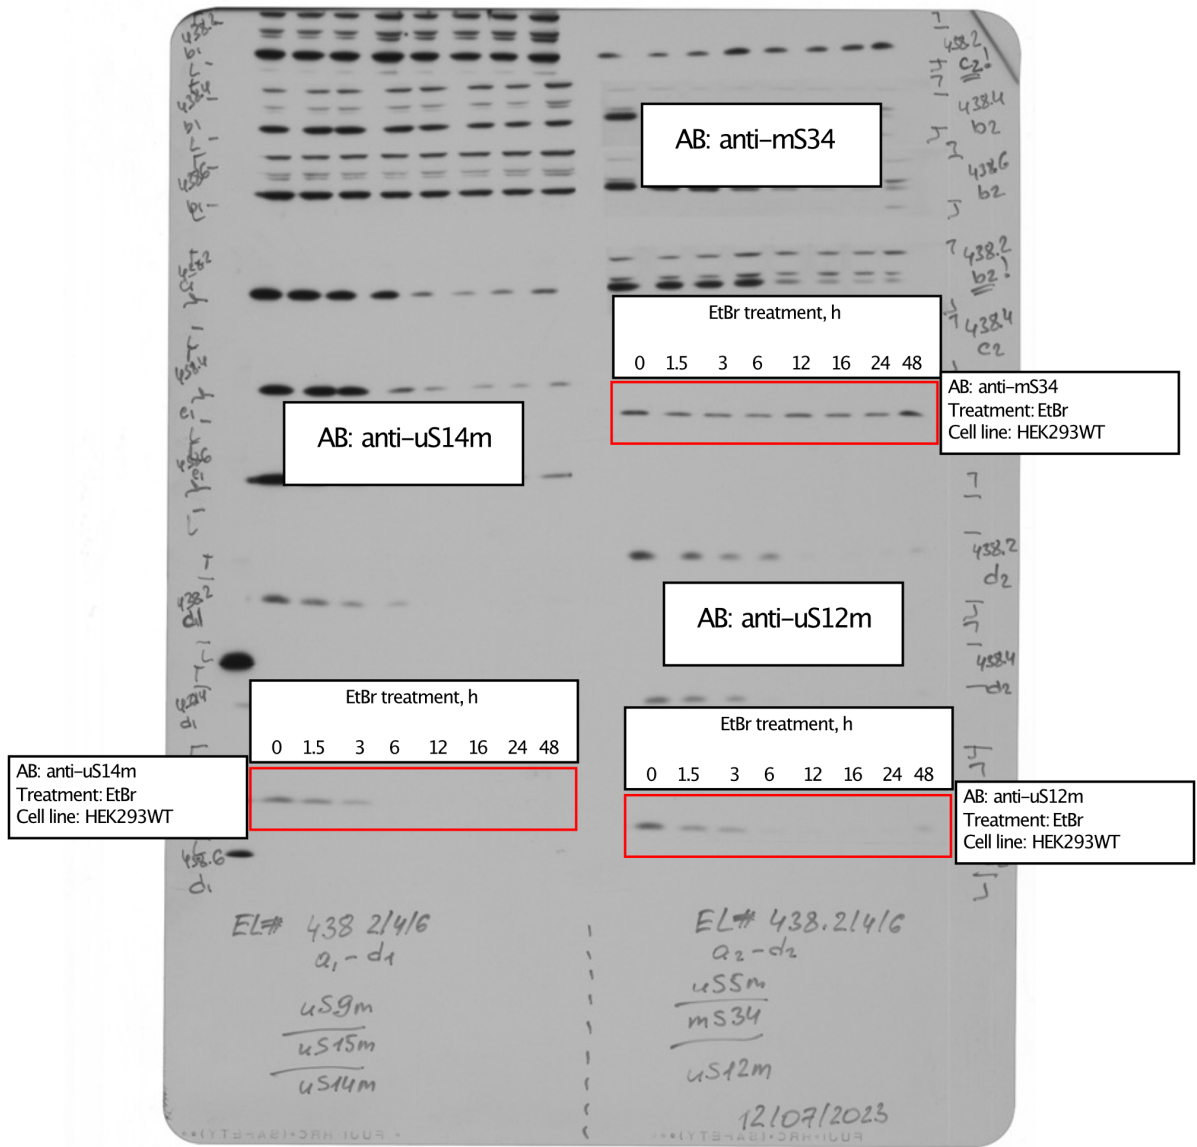

Supplementary Fig.13| Source Data for Supplementary Figure 7a

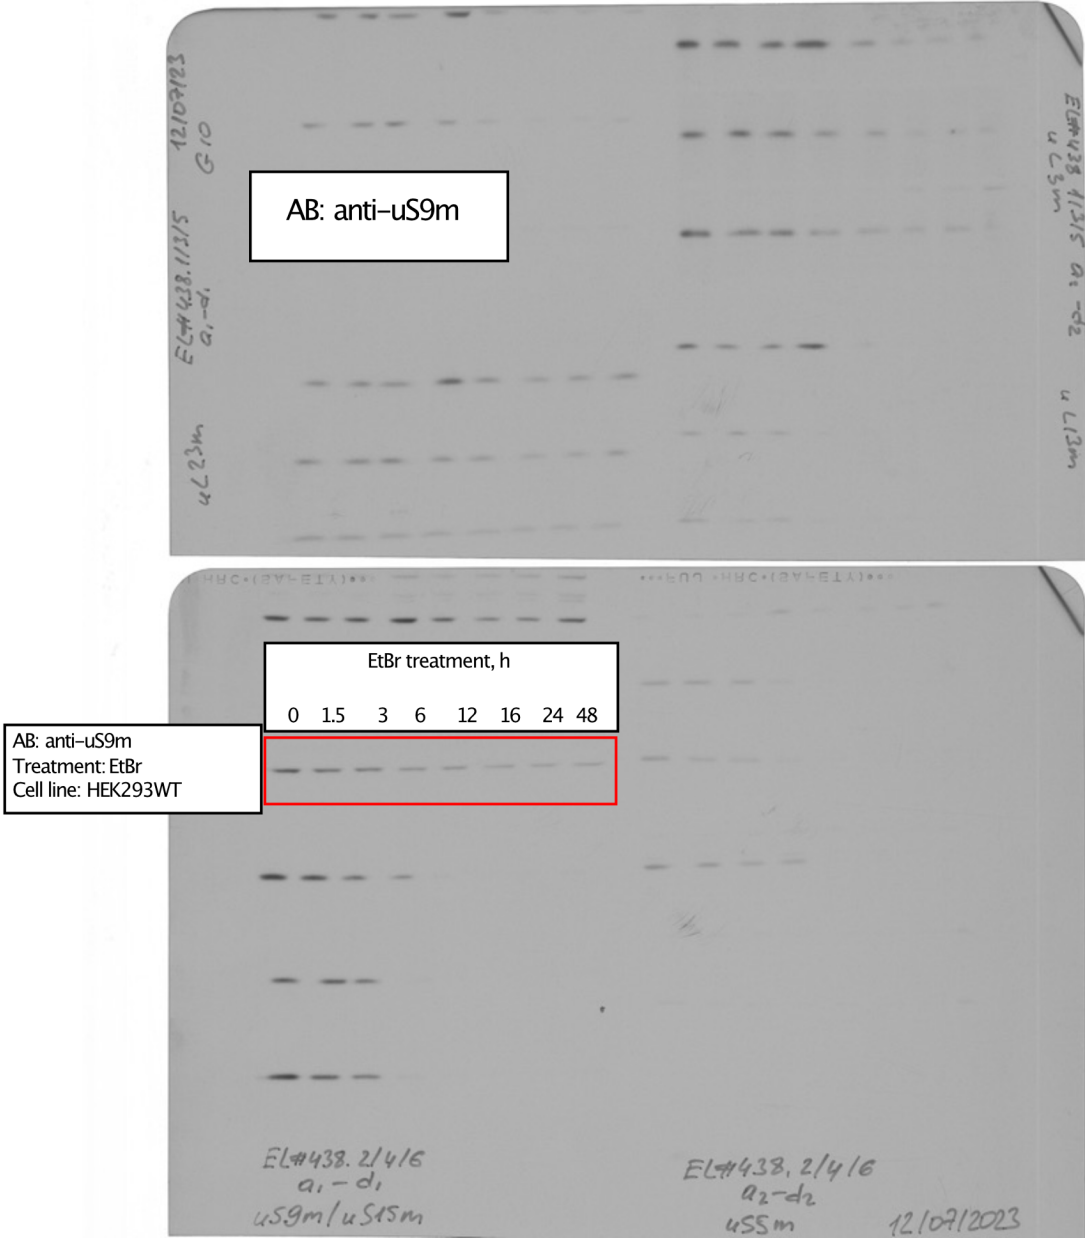

Supplementary Fig.13| Source Data for Supplementary Figure 7a (continuation)

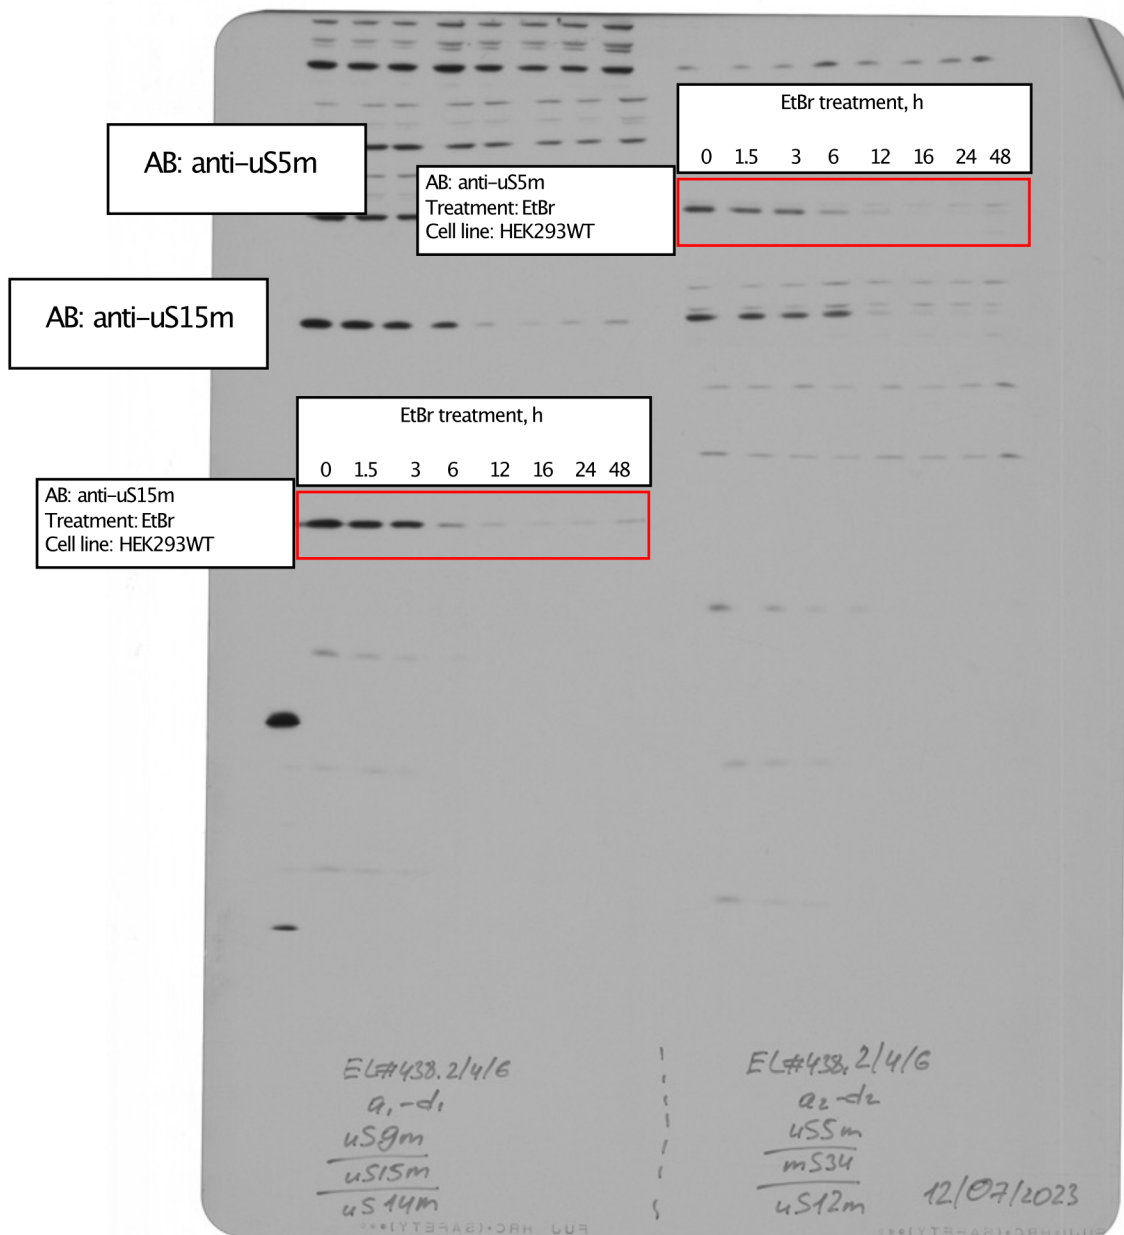

Supplementary Fig.13| Source Data for Supplementary Figure 7a (continuation)

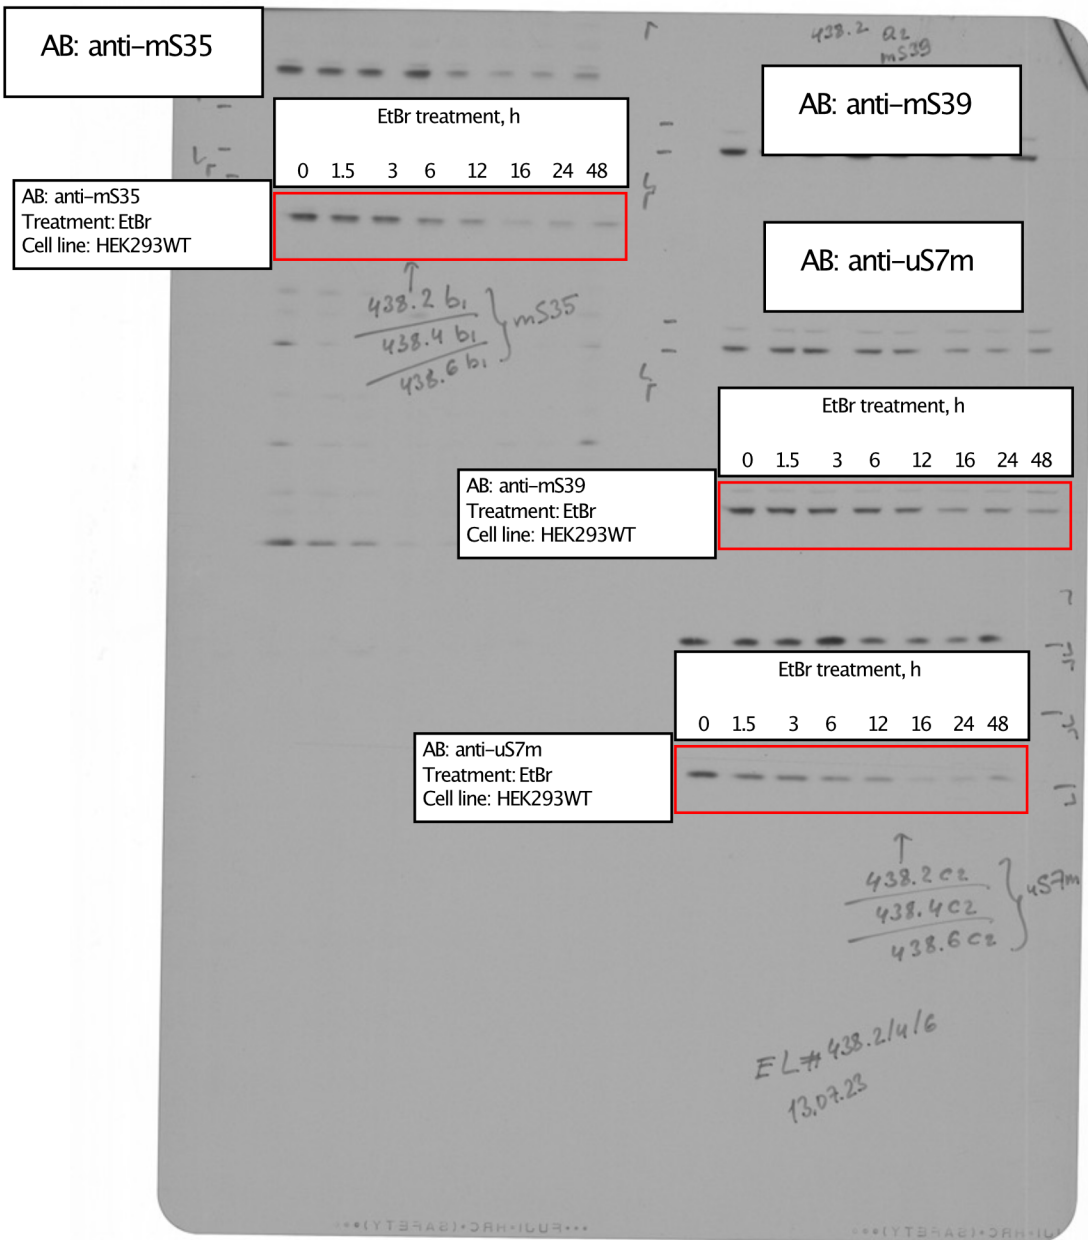

Supplementary Fig.13| Source Data for Supplementary Figure 7a (continuation)

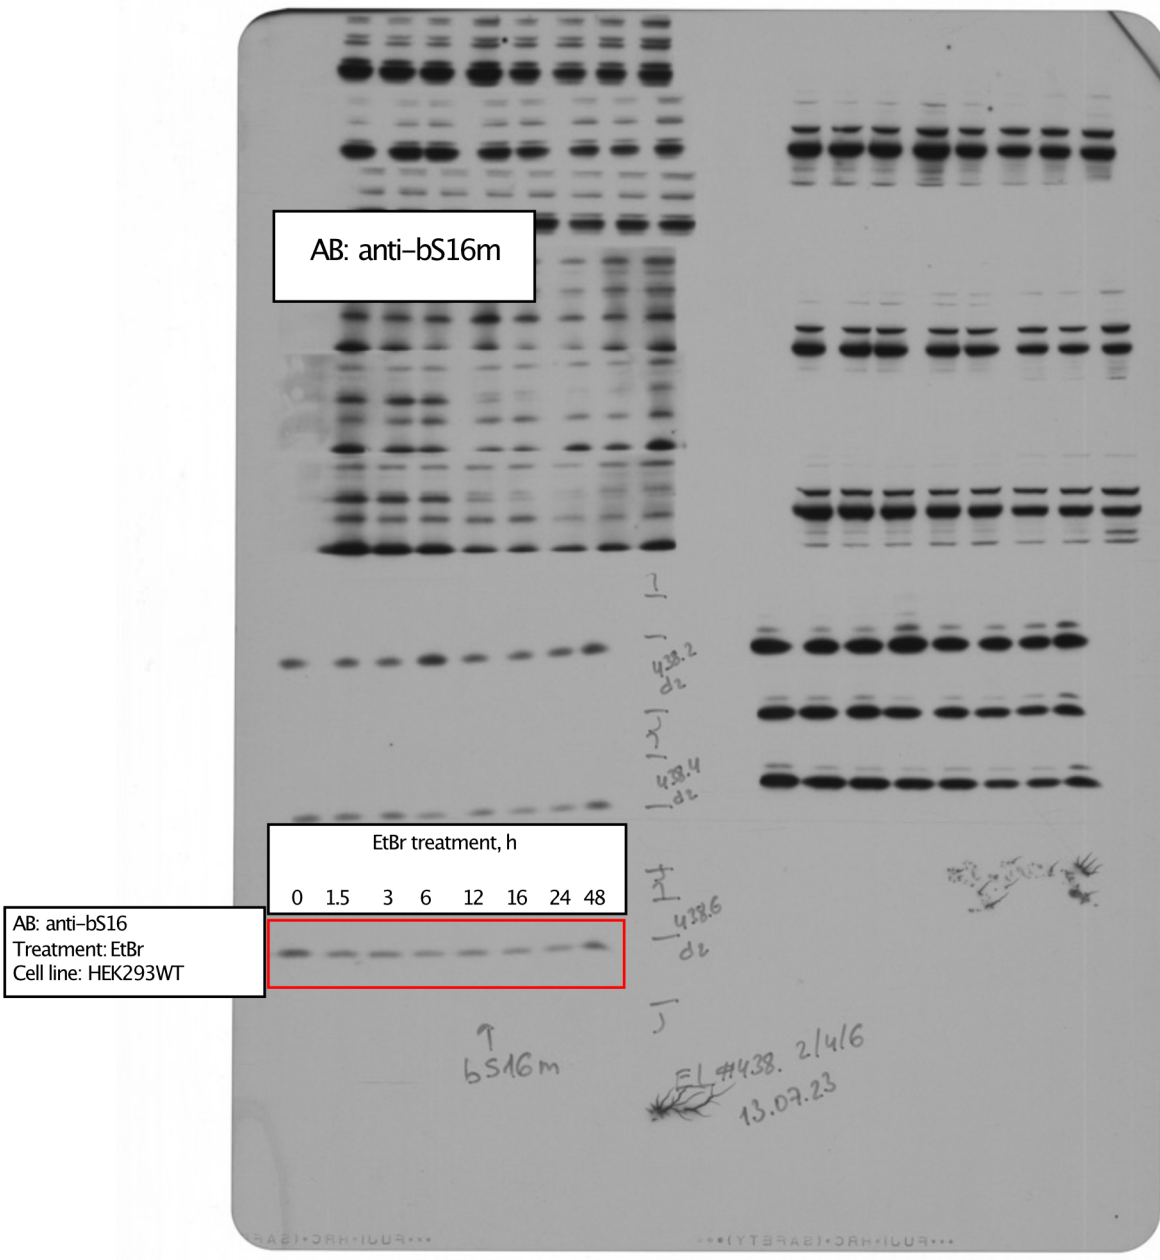

Supplementary Fig.13| Source Data for Supplementary Figure 7a (continuation)

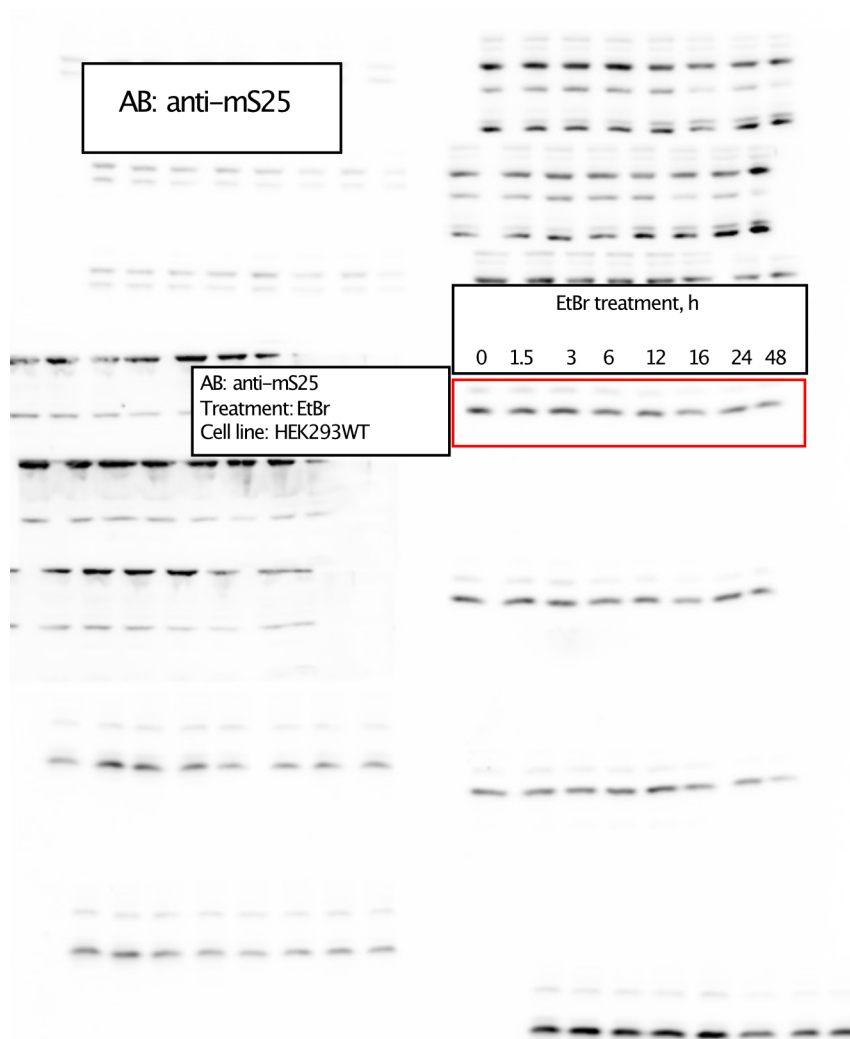

Supplementary Fig.13| Source Data for Supplementary Figure 7a (continuation)



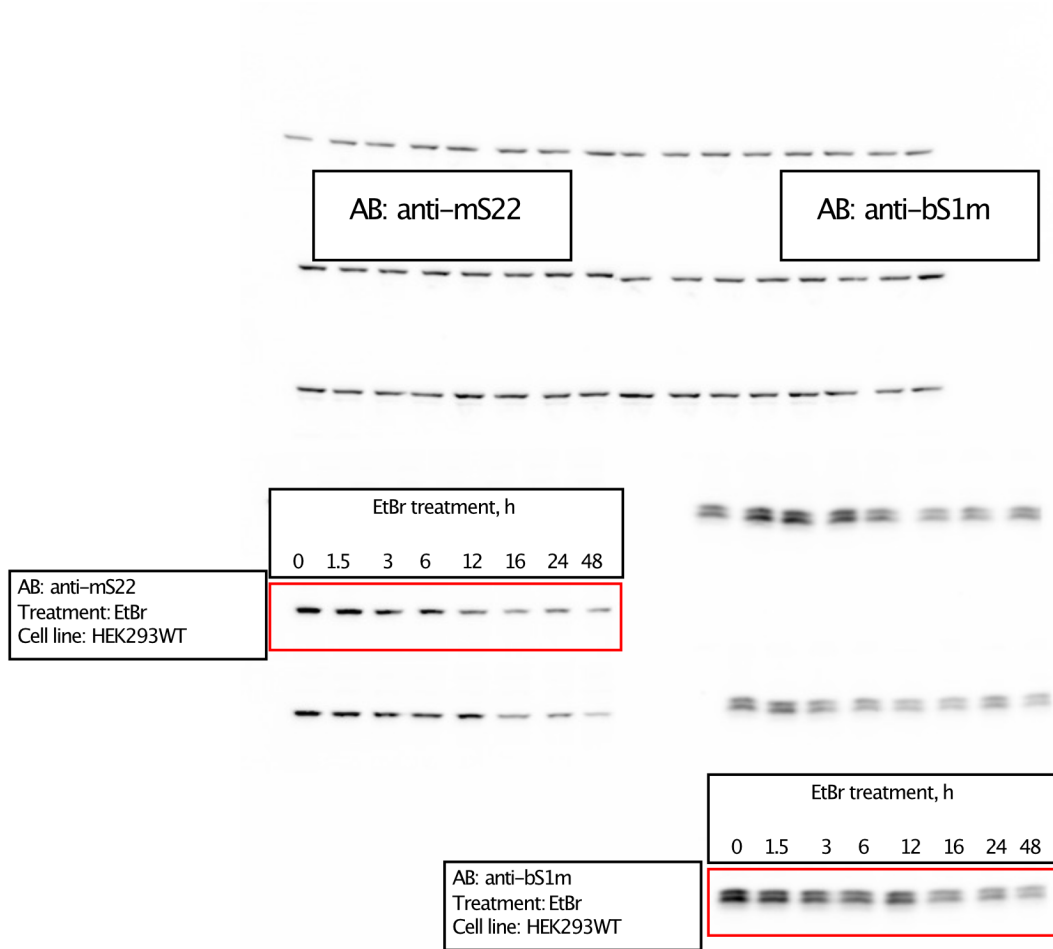

Supplementary Fig.13| Source Data for Supplementary Figure 7a (continuation)

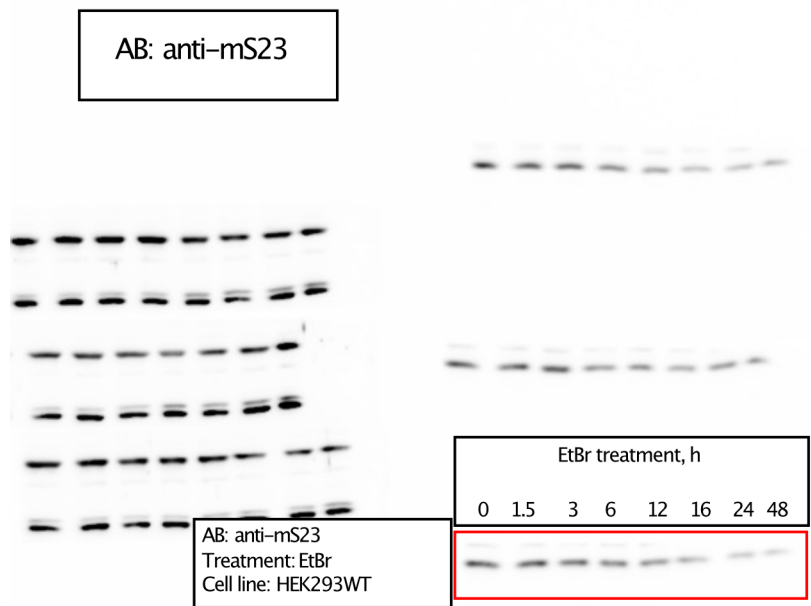

Supplementary Fig.13| Source Data for Supplementary Figure 7a (continuation)

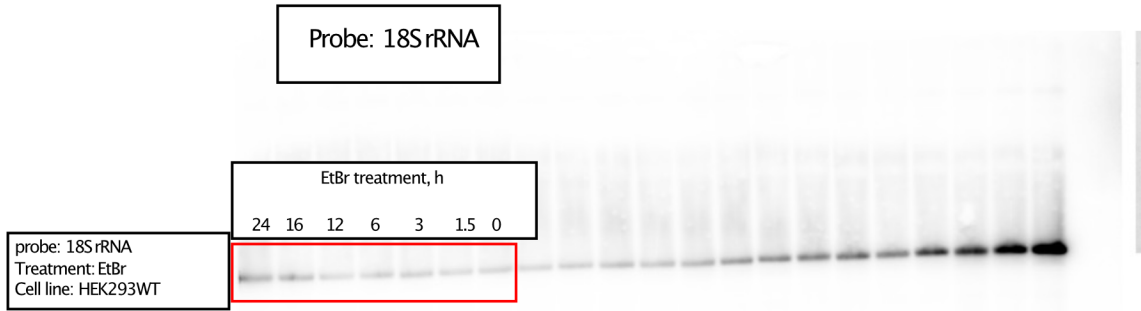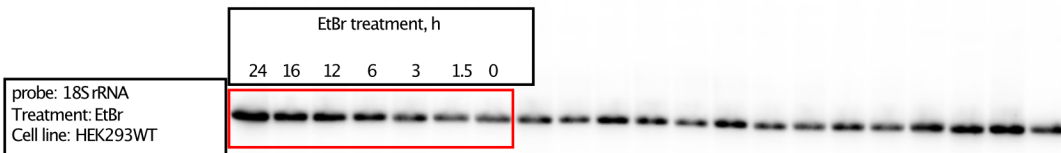

Supplementary Fig.14| Source Data for Supplementary Figure 7b

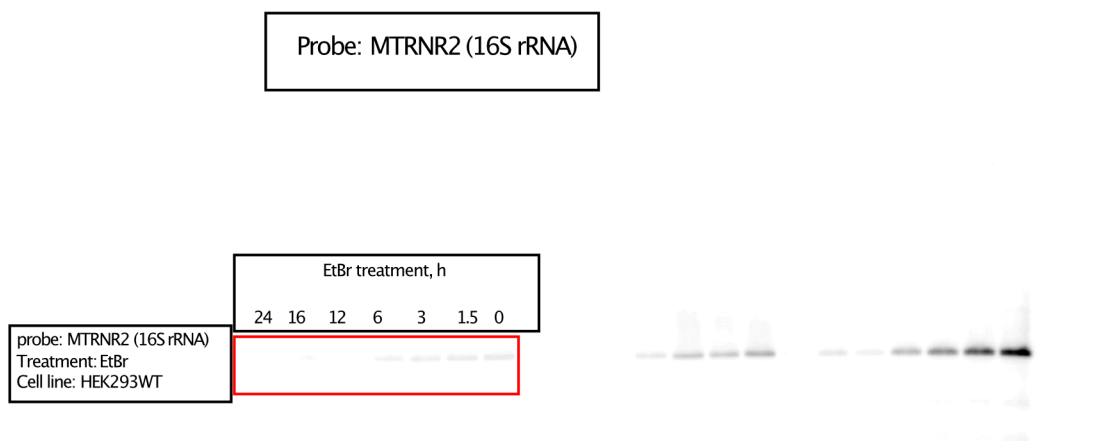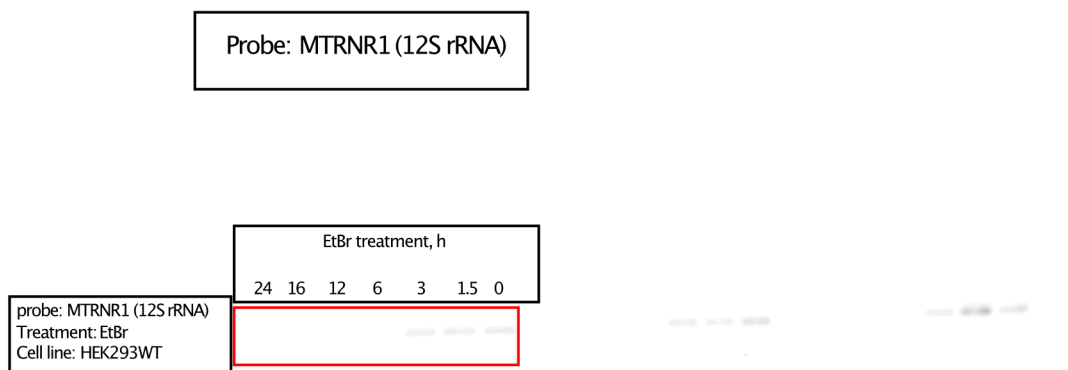

**Supplementary Fig.14| Source Data for Supplementary Figure 7b (continuation)**

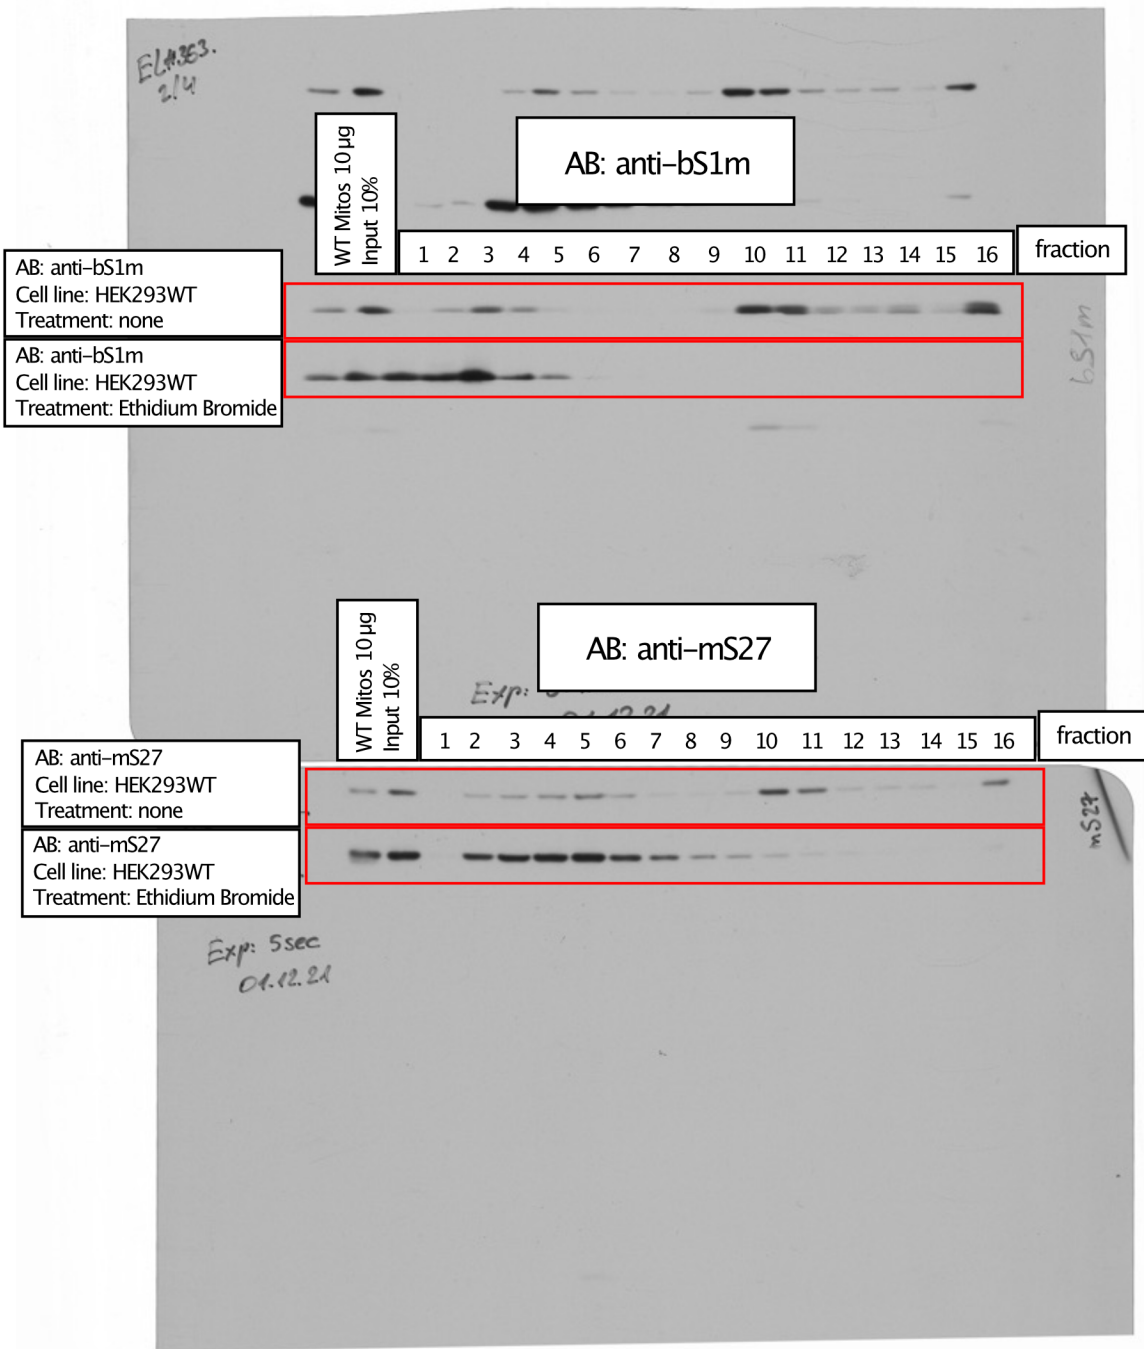

Supplementary Fig.15| Source Data for Supplementary Figure 8

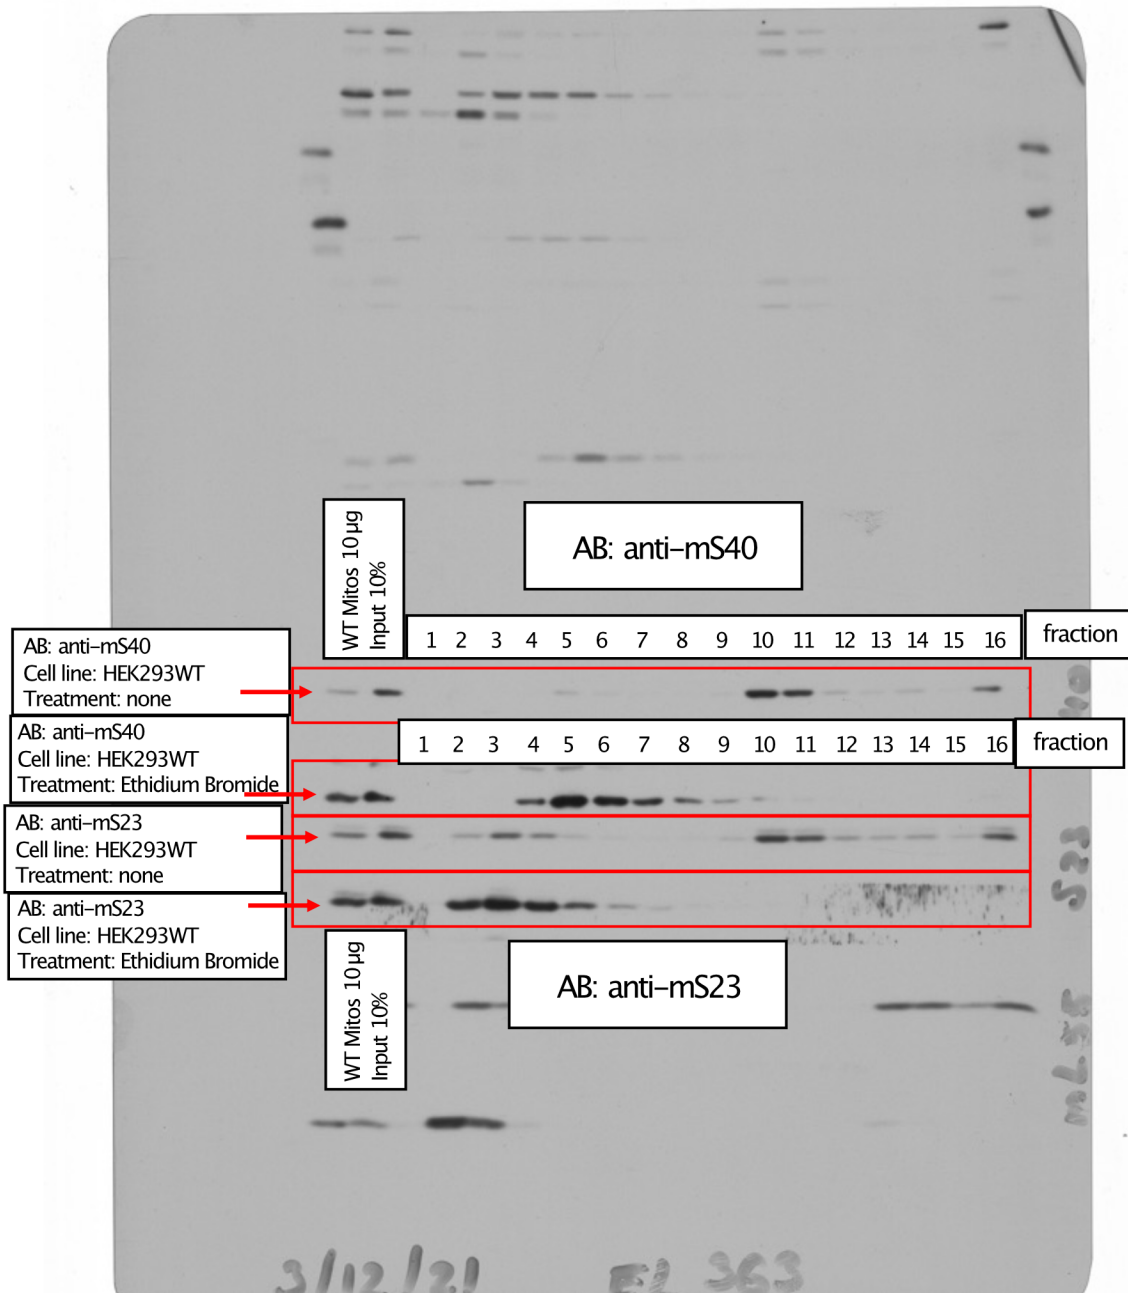

Supplementary Fig.15| Source Data for Supplementary Figure 8 (continuation)

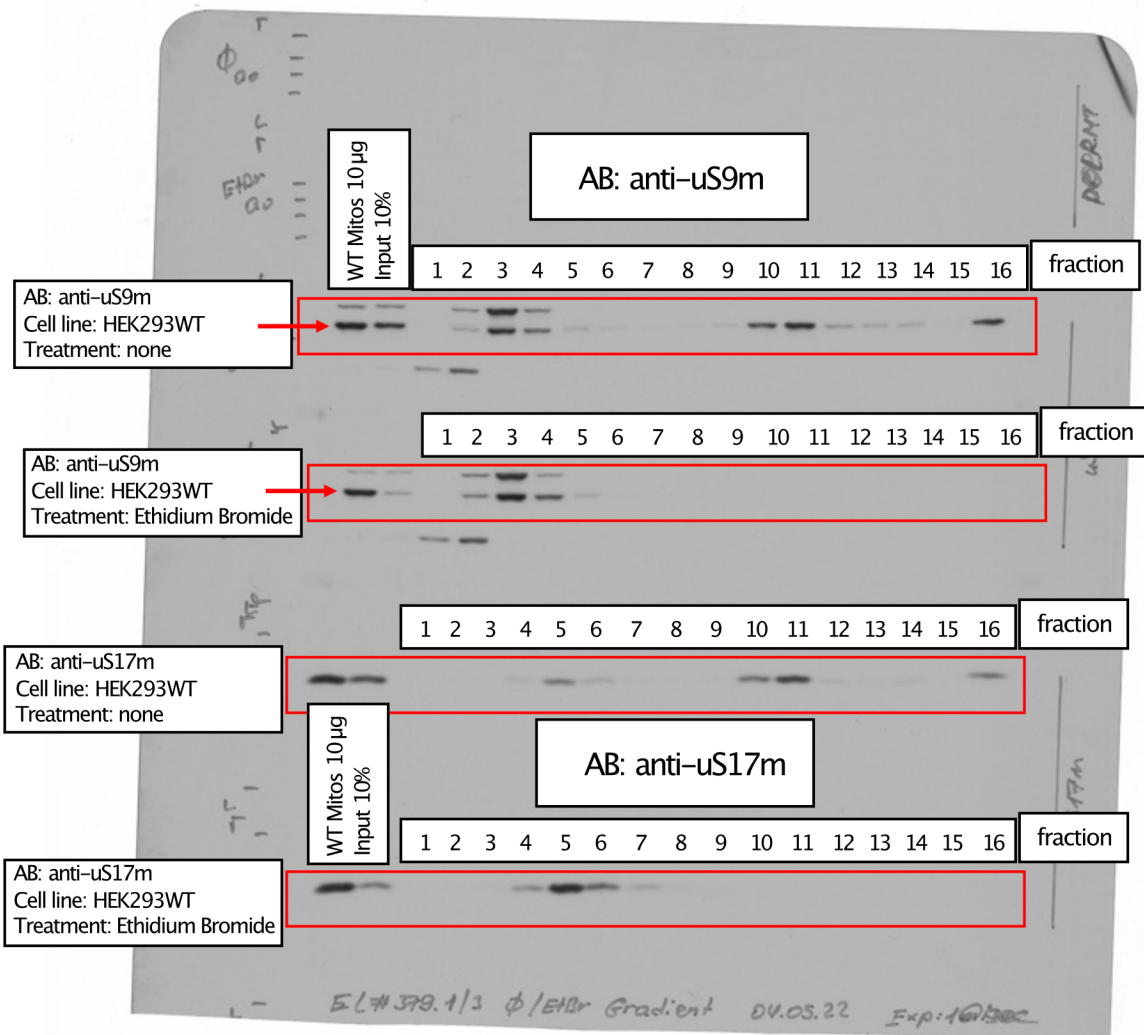

Supplementary Fig.15| Source Data for Supplementary Figure 8 (continuation)

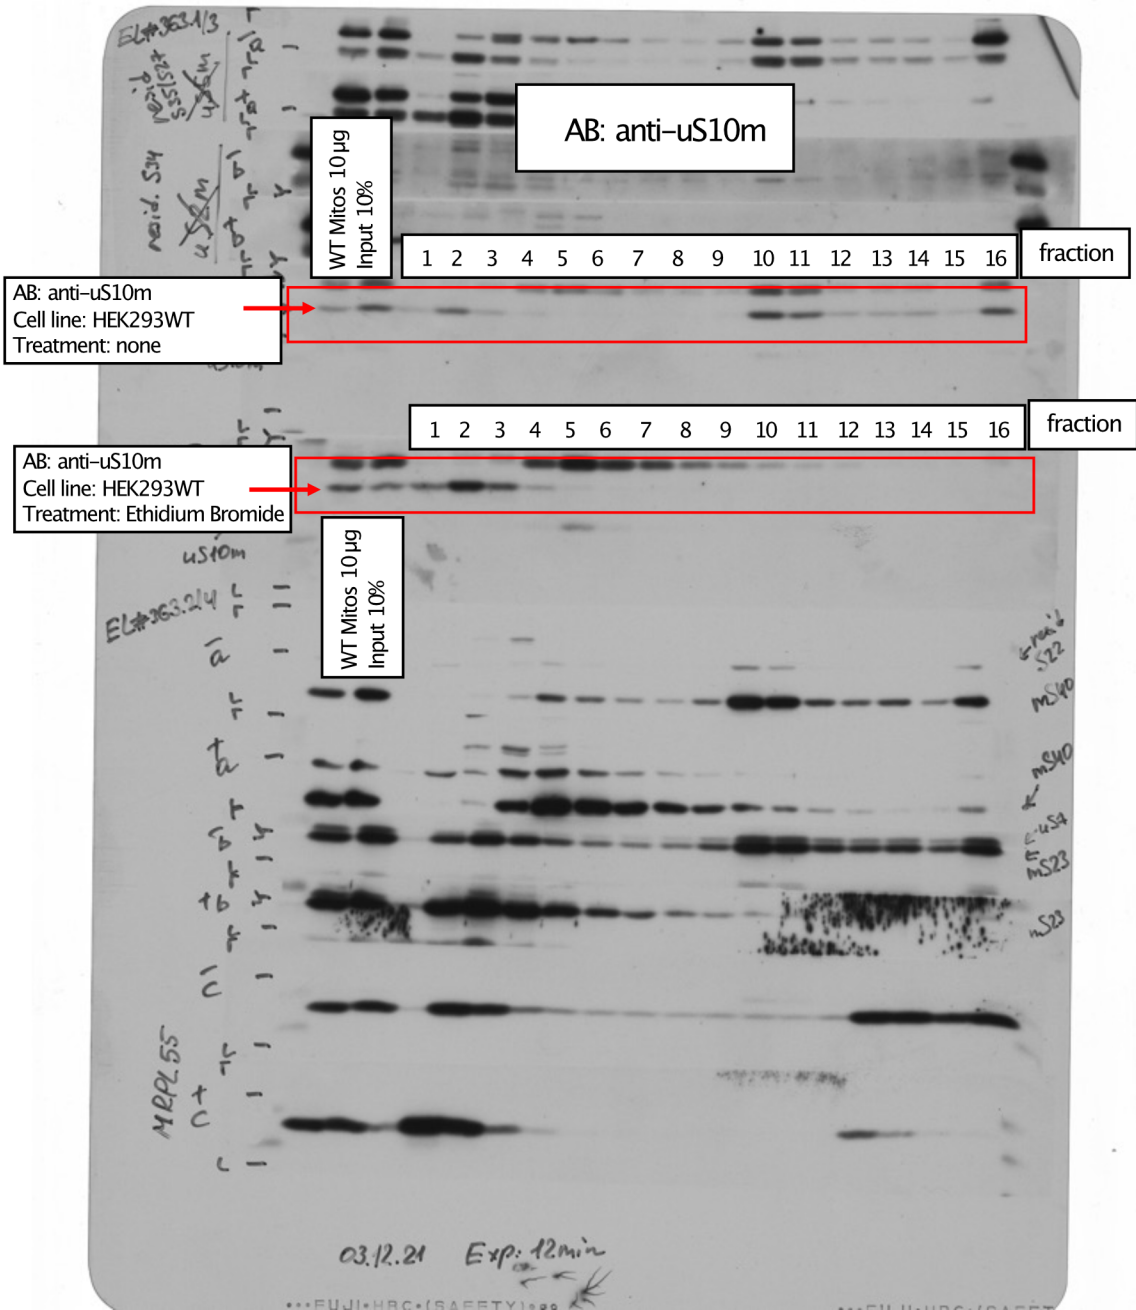

Supplementary Fig.15| Source Data for Supplementary Figure 8 (continuation)



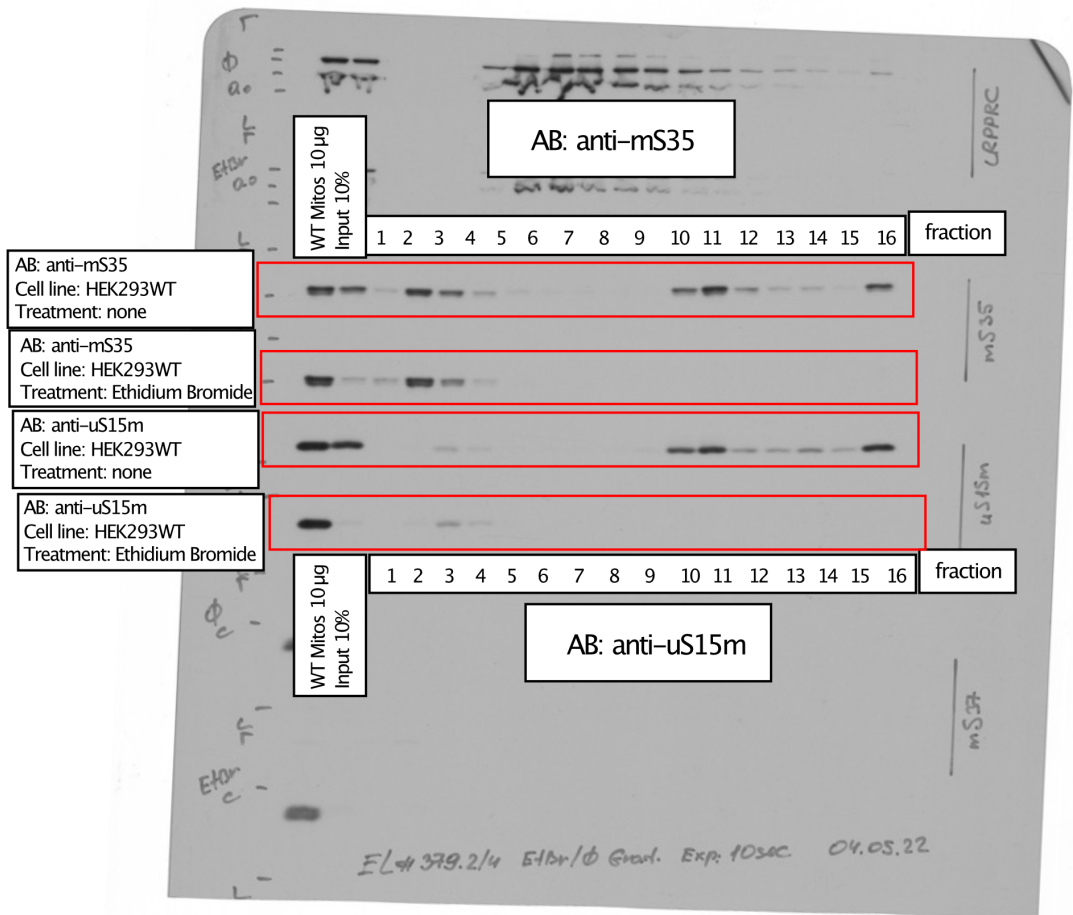

Supplementary Fig.15| Source Data for Supplementary Figure 8 (continuation)

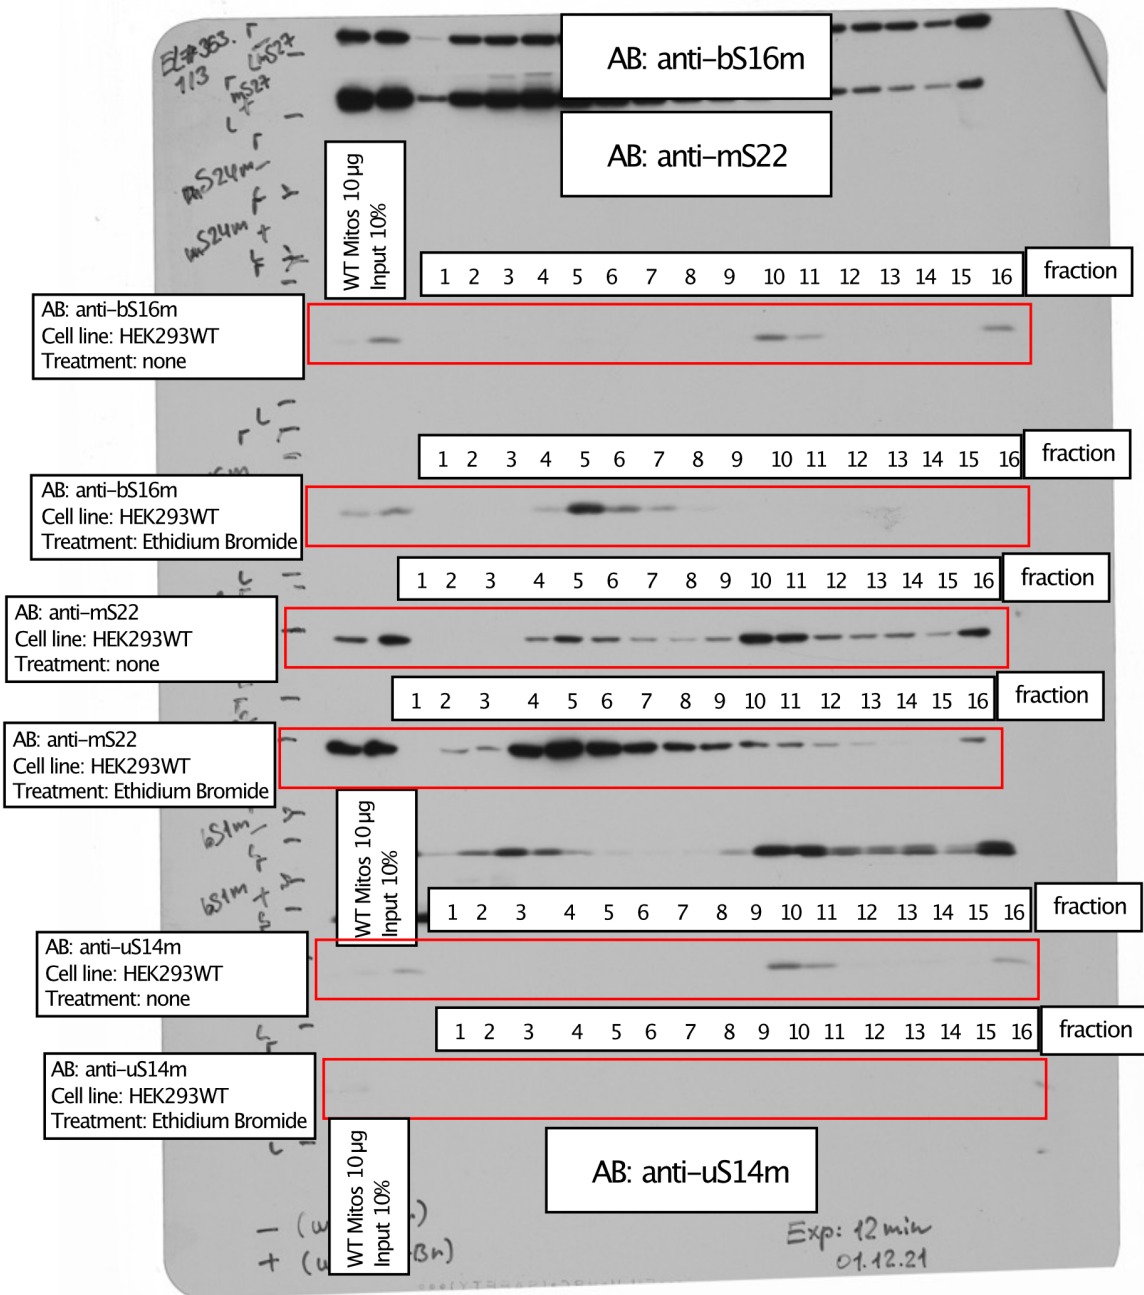

Supplementary Fig.15| Source Data for Supplementary Figure 8 (continuation)

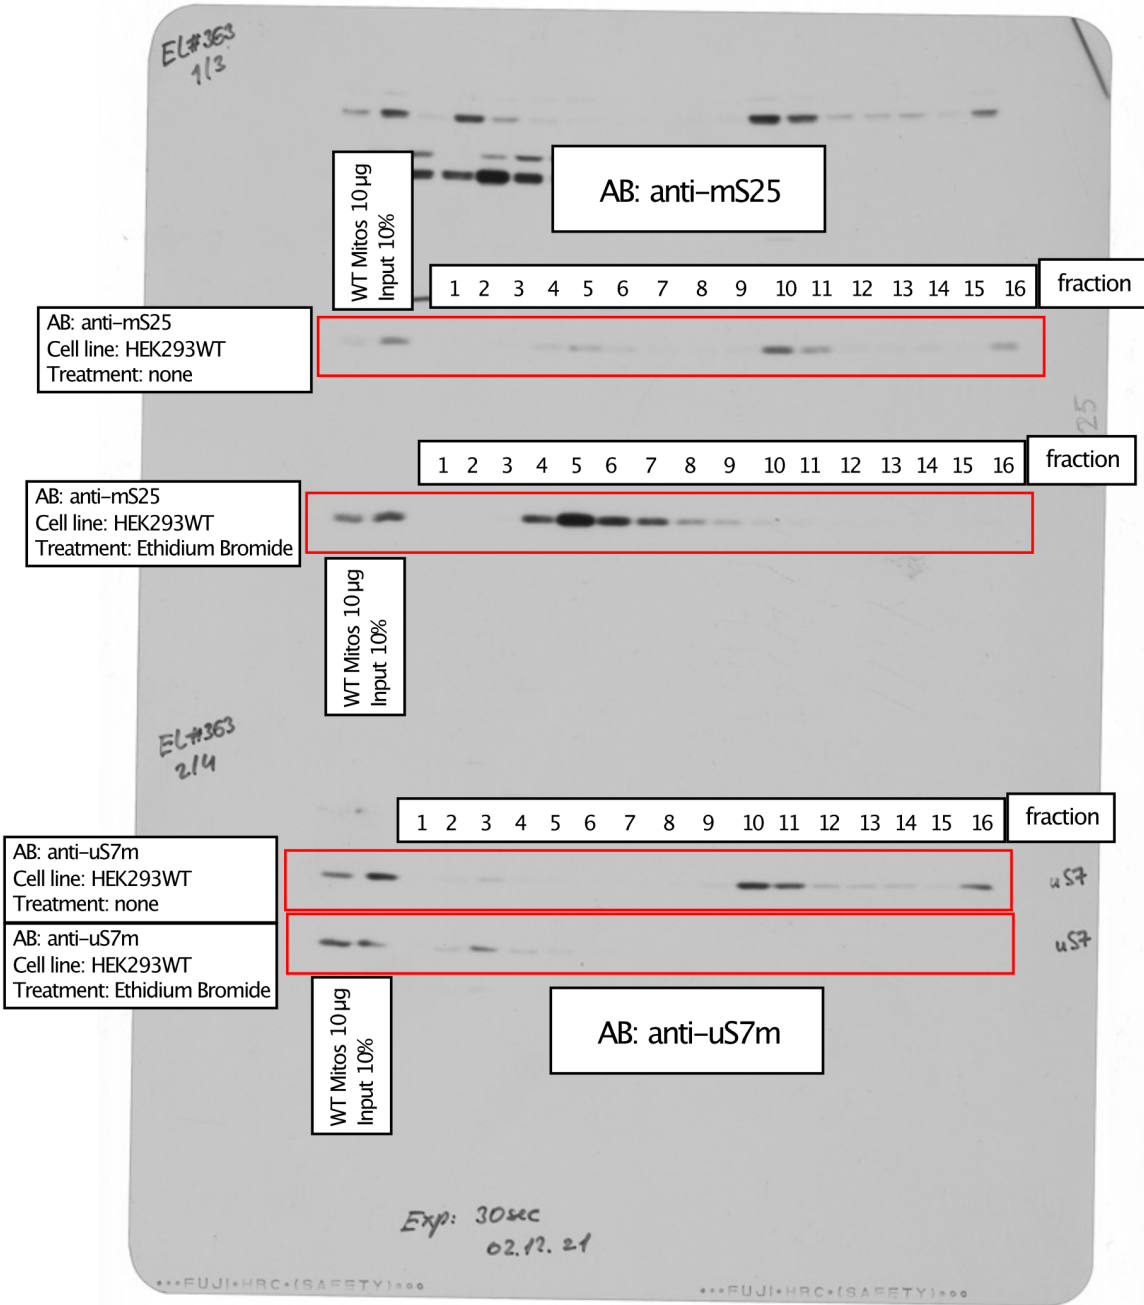

Supplementary Fig.15 | Source Data for Supplementary Figure 8 (continuation)

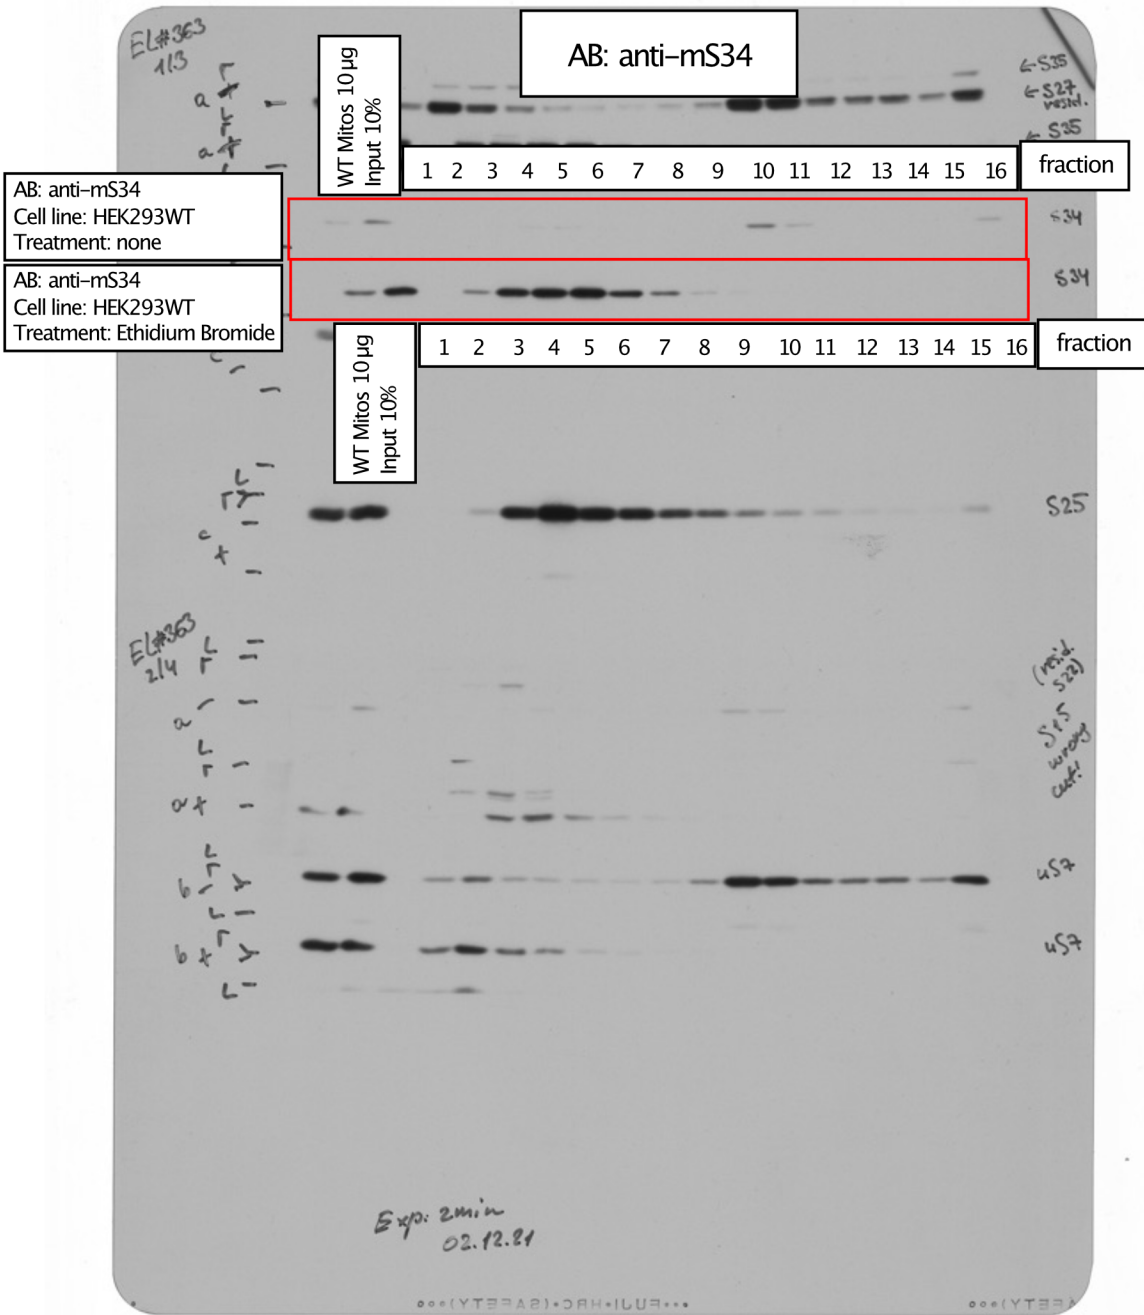

Supplementary Fig.15| Source Data for Supplementary Figure 8 (continuation)

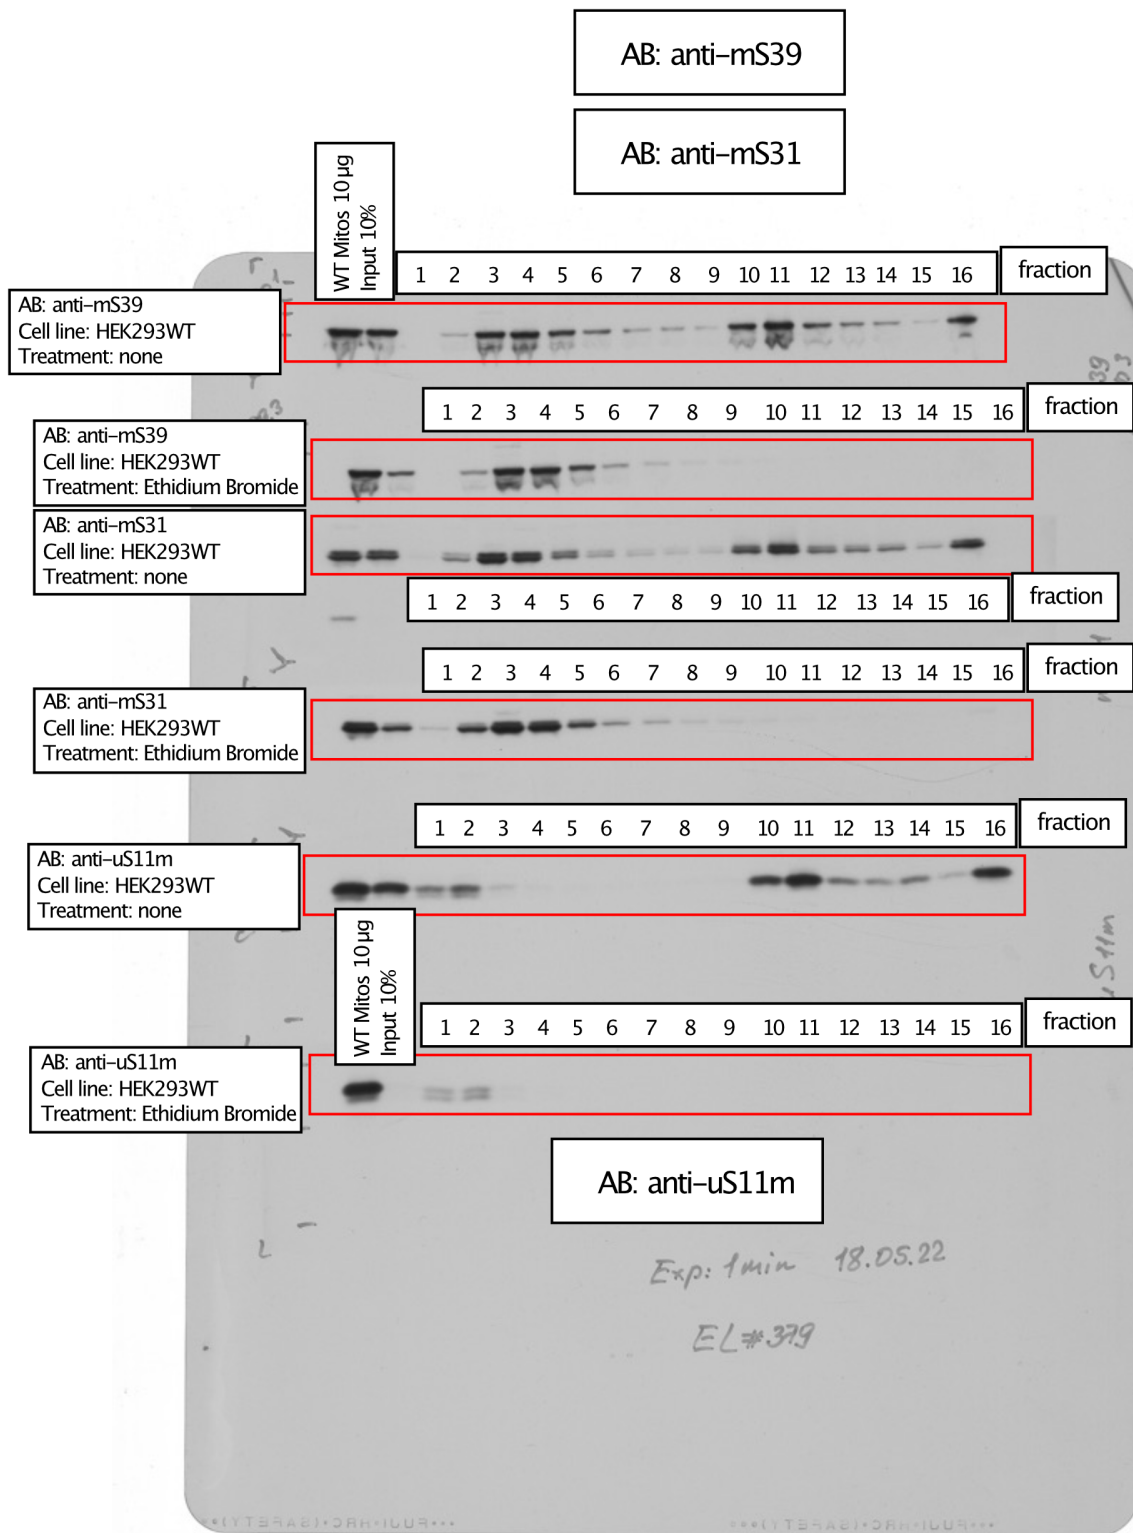

Supplementary Fig.15| Source Data for Supplementary Figure 8 (continuation)

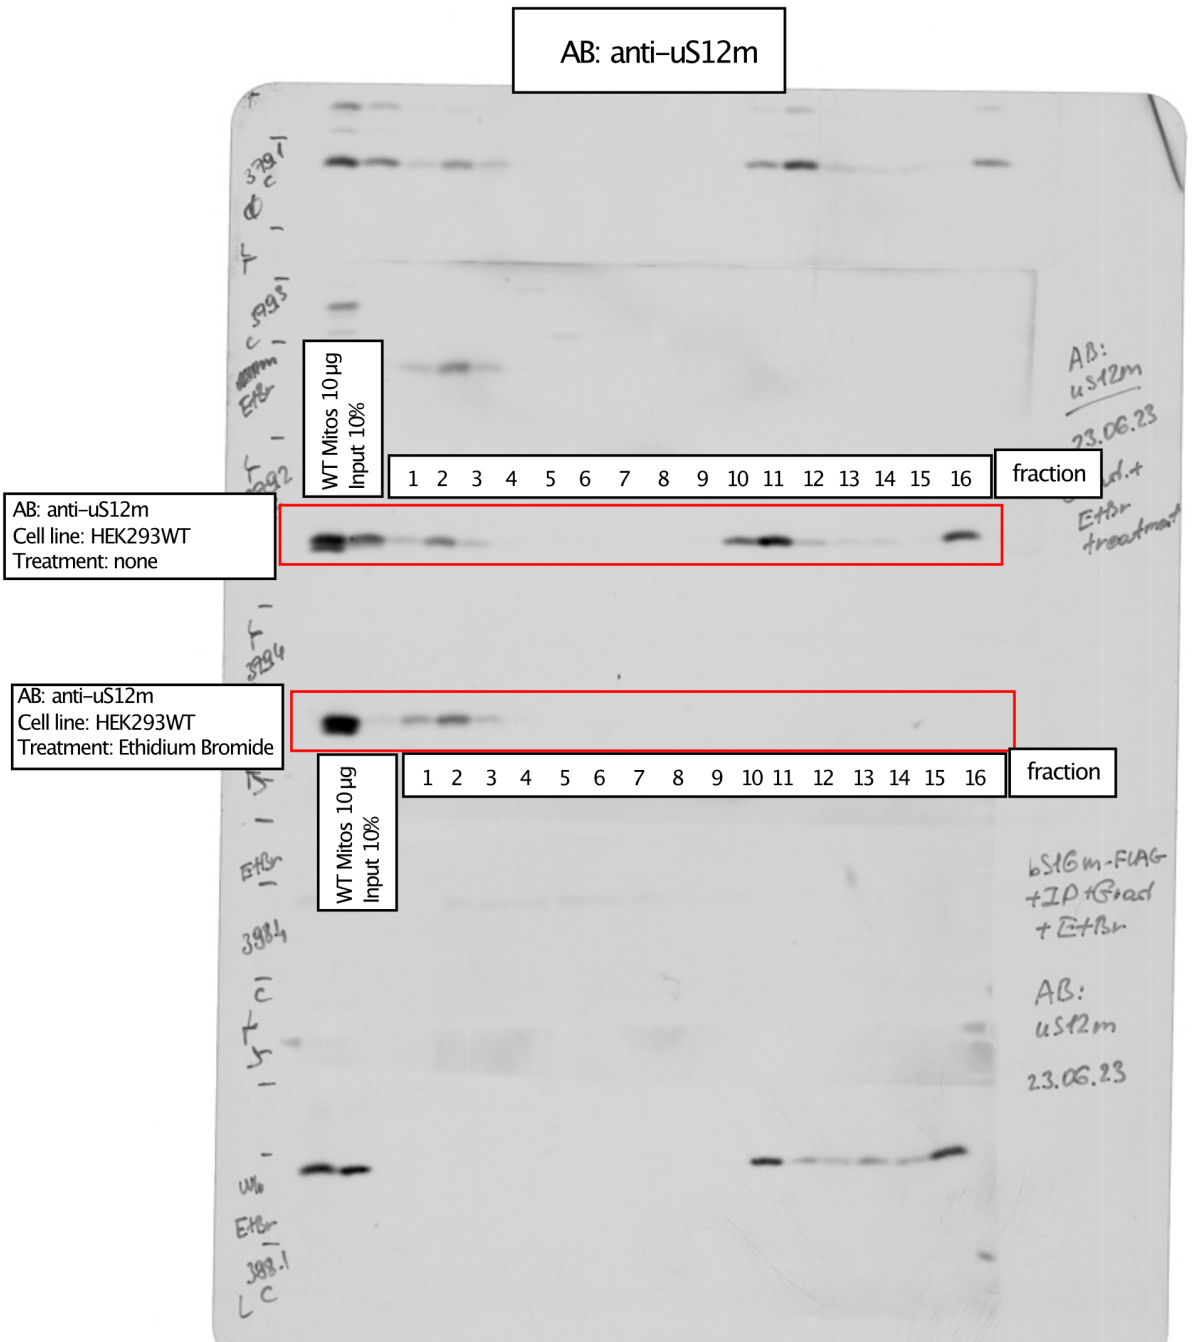

Supplementary Fig.15 | Source Data for Supplementary Figure 8 (continuation)

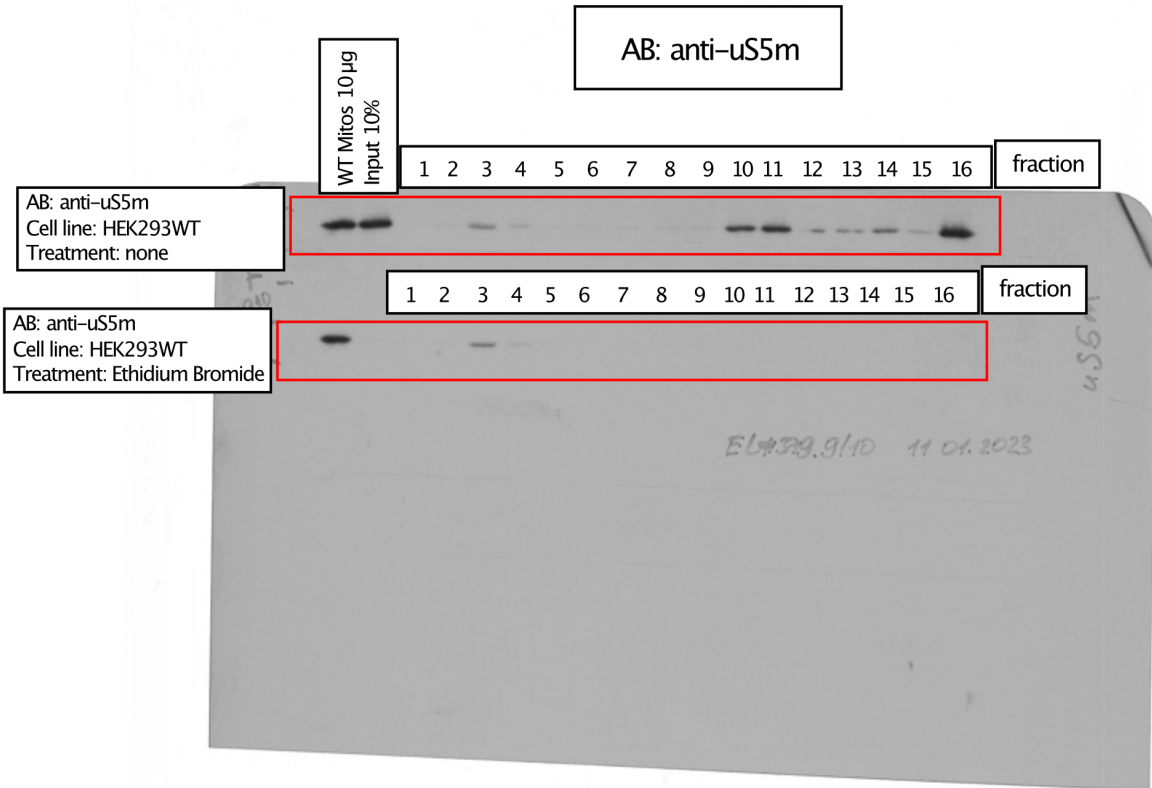

Supplementary Fig.15| Source Data for Supplementary Figure 8 (continuation)

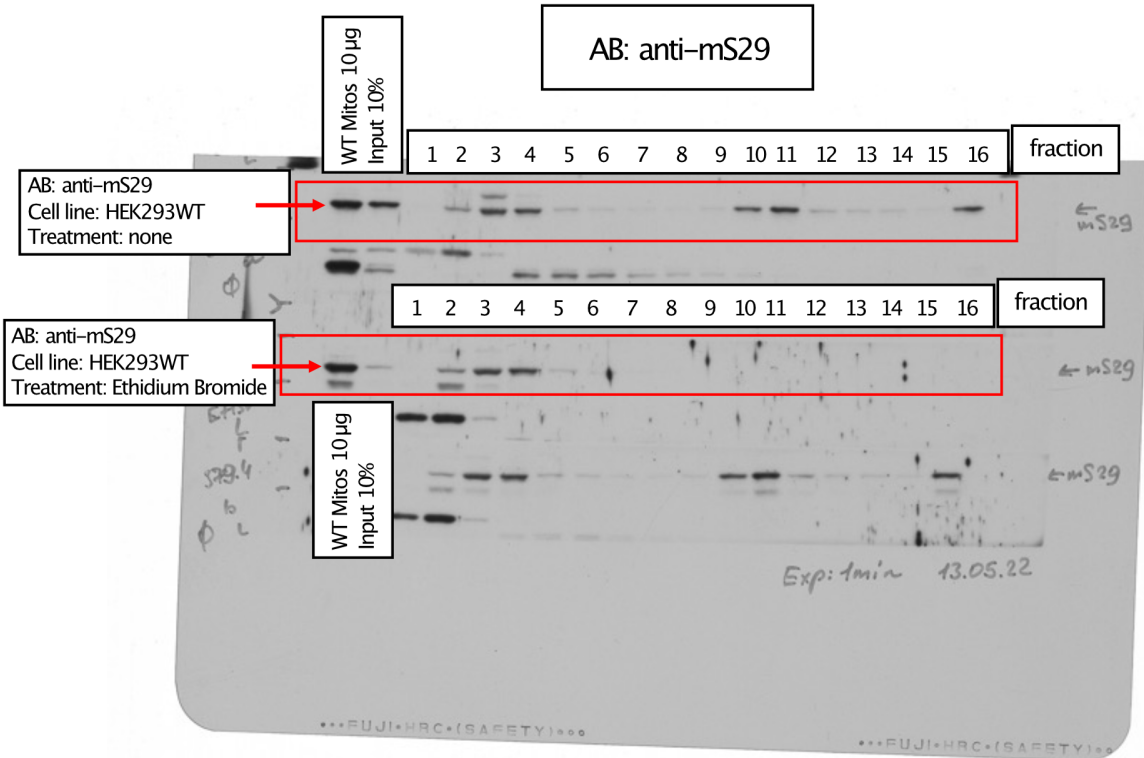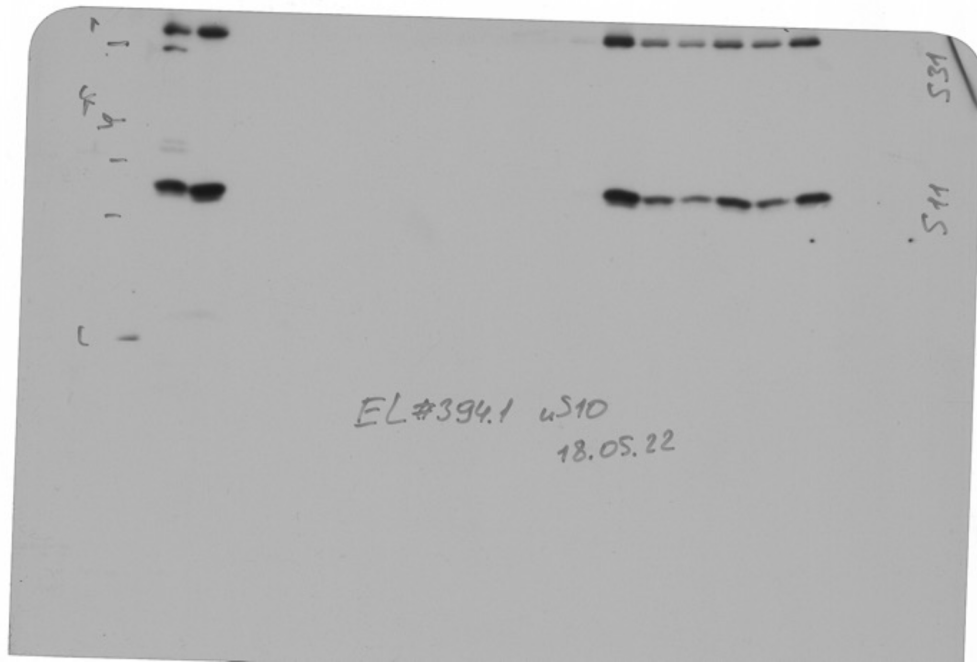

Supplementary Fig.15| Source Data for Supplementary Figure 8 (continuation)



## Supplementary Tables

**Supplementary Table 7: Prior distributions of kinetic rates for one-state-model and two-state-model**

| <i>parameter</i> | <i>parameter name</i>                                       | <i>distribution</i> | <i>distribution parameters</i> | <i>unit</i> |
|------------------|-------------------------------------------------------------|---------------------|--------------------------------|-------------|
| $k_a$            | degradation rate state A                                    | Uniform             | $L=0; U=1$                     | $h^{-1}$    |
| $k_b$            | degradation rate state B                                    | Uniform             | $L=0; U=1$                     | $h^{-1}$    |
| $k_{ab}$         | transfer rate from state A to state B                       | Uniform             | $L=0; U=1$                     | $h^{-1}$    |
| $t_m$            | doubling time in medium chase                               | Gamma               | $\alpha=5; \beta=0.7$          | h           |
| $t_l$            | doubling time in light chase                                | Gamma               | $\alpha=5; \beta=0.7$          | h           |
| $\sigma$         | standard deviation of Normal distribution of additive error | HalfNormal          | $\mu=0; \sigma=0.1$            | -           |

**Supplementary Table 8: Uniform parameter prior distribution ranges of flux model**

| <i>parameter</i> | <i>parameter name</i> | <i>min</i> | <i>max</i> | <i>unit</i> |
|------------------|-----------------------|------------|------------|-------------|
| $k_i$            | turnover rate         | 0          | 1          | $h^{-1}$    |
| $a_i$            | transfer rate         | 0          | 20         | $h^{-1}$    |
| $H_i(t=0)$       | MRP initial condition | 0          | 2          | a.u.        |
| $sd$             | standard deviation    | 0          | 100        | -           |

**Supplementary Table 9: mtSSU MRPs and module assignment**

| <i>MRP or module</i> | <i>members</i> | <i>sucrose gradient fraction</i> |
|----------------------|----------------|----------------------------------|
| mS27                 | mS27           | 1                                |
| mS31                 | mS31           | 1                                |
| bS16m                | bS16m          | 1                                |
| uS2m                 | uS2m           | 1                                |
| uS12m                | uS12m          | 1                                |
| uS11m                | uS11m          | 1                                |

|        |                                                                     |   |
|--------|---------------------------------------------------------------------|---|
| bS16m' | bS16m                                                               | 2 |
| uS11m' | uS11m                                                               | 2 |
| uS12m' | uS12m                                                               | 2 |
| uS3m   | uS3m                                                                | 2 |
| B1     | bS6m, bS1m, mS23, uS2m                                              | 1 |
| H1     | uS10m, mS35                                                         | 1 |
| HB1    | B1, uS9m                                                            | 2 |
| B2     | mS22, mS25                                                          | 2 |
| B3     | mS27, mS34                                                          | 2 |
| B4     | uS17m, mS26                                                         | 2 |
| H3     | mS29, uS7m                                                          | 2 |
| H2     | mS39, mS31, uS3m                                                    | 2 |
| H2'    | H2                                                                  | 3 |
| HB2    | H1, HB1                                                             | 3 |
| B5     | mS40, bS16m', B2, B3, B4                                            | 3 |
| HB3    | B5, HB2                                                             | 4 |
| HB4    | H2', H3, 12SRNA, uS14m, uS15m                                       | 5 |
| mtSSU  | all mtSSU MRPs (bS18m, bS21m, HB3, HB4, mS33, uS12m', uS5m, uS11m') | 6 |

**Supplementary Table 10: List of all reactions that lead to the formation of different mtSSU modules.** A graphic representation of these reactions is depicted in **Fig.3**.

| <i>educt E</i> | <i>product P</i> |
|----------------|------------------|
| bS1m           | B1               |
| bS6m           | B1               |
| mS23           | B1               |
| uS2m           | B1               |
| mS22           | B2               |
| mS25           | B2               |
| mS27           | B3               |
| mS34           | B3               |
| mS26           | B4               |
| uS17m          | B4               |
| B2             | B5               |
| B3             | B5               |
| B4             | B5               |
| bS16m'         | B5               |
| mS40           | B5               |
| bS16m          | bS16m'           |
| mS35           | H1               |
| uS10m          | H1               |
| mS31           | H2               |
| mS39           | H2               |
| uS3m           | H2               |
| H2             | H2'              |

|        |        |
|--------|--------|
| mS29   | H3     |
| uS7m   | H3     |
| B1     | HB1    |
| uS9m   | HB1    |
| H1     | HB2    |
| HB1    | HB2    |
| B5     | HB3    |
| HB2    | HB3    |
| H2'    | HB4    |
| H3     | HB4    |
| 12SRNA | HB4    |
| uS14m  | HB4    |
| uS15m  | HB4    |
| bS18m  | mtSSU  |
| bS21m  | mtSSU  |
| HB3    | mtSSU  |
| HB4    | mtSSU  |
| mS33   | mtSSU  |
| mS38   | mtSSU  |
| uS12m' | mtSSU  |
| uS5m   | mtSSU  |
| uS11m' | mtSSU  |
| uS11m  | uS11m' |
| uS12m  | uS12m' |

**Supplementary Table 11: Truncated normal prior distribution parameters of mtSSU model.**

| <i>parameter</i> | parameter name         | $\mu$ | $\sigma$ | <i>max</i> | <i>unit</i>                        |
|------------------|------------------------|-------|----------|------------|------------------------------------|
| $on_j$           | binding rate           | 100   | 100      | $10^6$     | a.u. <sup>-n</sup> h <sup>-1</sup> |
| $off_j$          | unbinding rate         | 1     | 1        | 5          | h <sup>-1</sup>                    |
| $k_i$            | turnover rate          | 0.1   | 0.3      | 1          | h <sup>-1</sup>                    |
| $P_i(t=0)$       | MRPs initial condition | 0.1   | 1        | 5          | a.u.                               |
| $sd$             | standard deviation     | 0     | 1        | 10         | -                                  |

Here,  $n$  indicates the order of the binding reaction (*i.e.* number of binding partners) -1.

**Supplementary Table 12. Key reagents and resources**

| REAGENT or RESOURCE                  | Supplier      | Catalog No. |
|--------------------------------------|---------------|-------------|
| <b>Antibodies</b>                    |               |             |
| Rabbit polyclonal anti-bS1m (1:1000) | Proteintech   | 16378-1-AP  |
| Rabbit polyclonal anti-uS5m (1:5000) | Proteintech   | 16428-1-AP  |
| Rabbit polyclonal anti-uS7m (1:1000) | Sigma-Aldrich | HPA 023007  |

|                                        |              |            |
|----------------------------------------|--------------|------------|
| Rabbit polyclonal anti-uS9m (1:7500)   | ProteinTech  | 16533-1-AP |
| Rabbit polyclonal anti-uS10m (1:1000)  | ProteinTech  | 16030-1-AP |
| Rabbit polyclonal anti-uS11m (1:1000)  | ProteinTech  | 17041-1-AP |
| Rabbit polyclonal anti-uS12m (1:1000)  | ProteinTech  | 15225-1-AP |
| Rabbit polyclonal anti-uS14m (1:1000)  | ProteinTech  | 16301-1-AP |
| Rabbit polyclonal anti-uS15m (1:5000)  | ProteinTech  | 17106-1-AP |
| Rabbit polyclonal anti-bS16m (1:5000)  | ProteinTech  | 16735-1-AP |
| Rabbit polyclonal anti-uS17m (1:1000)  | ProteinTech  | 18881-1-AP |
| Rabbit polyclonal anti-mS22 (1:5000)   | ProteinTech  | 10984-1-AP |
| Rabbit polyclonal anti-mS23 (1:10000)  | ProteinTech  | 18345-1-AP |
| Rabbit polyclonal anti-mS25 (1:5000)   | ProteinTech  | 15277-1-AP |
| Rabbit polyclonal anti-mS27 (1:10000)  | ProteinTech  | 17280-1-AP |
| Rabbit polyclonal anti-mS29 (1:1000)   | ProteinTech  | 10276-1-AP |
| Rabbit polyclonal anti-mS31 (1:10000)  | ProteinTech  | 16288-1-AP |
| Rabbit polyclonal anti-mS34 (1:5000)   | ProteinTech  | 15166-1-AP |
| Rabbit polyclonal anti-mS35 (1:5000)   | ProteinTech  | 16457-1-AP |
| Rabbit polyclonal anti-mS37 (1:500)    | ProteinTech  | 11728-1-AP |
| Rabbit polyclonal anti-mS39 (1:20000)  | ProteinTech  | 25158-1-AP |
| Rabbit polyclonal anti-mS40 (1:5000)   | ProteinTech  | 16139-1-AP |
| Rabbit polyclonal anti-uL1m (1:10000)  | <sup>1</sup> | PRAB4964   |
| Rabbit polyclonal anti-uL3m (1:500)    | Proteintech  | 16584-1-AP |
| Rabbit polyclonal anti-uL4m (1:1000)   | Proteintech  | 27484-1-AP |
| Rabbit polyclonal anti-bL9m (1:5000)   | Proteintech  | 15342-1-AP |
| Rabbit polyclonal anti-uL10m (1:1000)  | Proteintech  | 16652-1-AP |
| Rabbit polyclonal anti-uL11m (1:1000)  | Proteintech  | 15543-1-AP |
| Rabbit polyclonal anti-bL12m (1:5000)  | Proteintech  | 14795-1-AP |
| Rabbit polyclonal anti-uL13m (1:5000)  | Proteintech  | 16241-1-AP |
| Rabbit polyclonal anti-uL14m (1:1000)  | Proteintech  | 15040-1-AP |
| Rabbit polyclonal anti-uL15m (1:1000)  | Proteintech  | 18339-1-AP |
| Rabbit polyclonal anti-bL17m (1:1000)  | Proteintech  | 17214-1-AP |
| Rabbit polyclonal anti-uL18m (1:1000)  | Proteintech  | 15178-1-AP |
| Rabbit polyclonal anti-bL19m (1:1000)  | Proteintech  | 16517-1-AP |
| Rabbit polyclonal anti-bL20m (1:200)   | Proteintech  | 16969-A-AP |
| Rabbit polyclonal anti-bL21m (1:1000)  | Proteintech  | 16978-1-AP |
| Rabbit polyclonal anti-uL22m (1:500)   | Proteintech  | 16299-1-AP |
| Rabbit polyclonal anti-uL23m (1:10000) | <sup>1</sup> | PRAB1716   |
| Rabbit polyclonal anti-uL24m (1:10000) | Proteintech  | 16224-1-AP |
| Rabbit polyclonal anti-uL29m (1:1000)  | Proteintech  | 24728-1-AP |
| Rabbit polyclonal anti-bL31m (1:1000)  | Proteintech  | 17679-1-AP |
| Rabbit polyclonal anti-bL32m (1:1000)  | <sup>2</sup> | 4957/4     |
| Rabbit polyclonal anti-mL38 (1:7500)   | Proteintech  | 15913-1-AP |
| Rabbit polyclonal anti-mL39 (1:500)    | This study   | PRAB4962   |

|                                                                                                                                                    |                            |            |
|----------------------------------------------------------------------------------------------------------------------------------------------------|----------------------------|------------|
| Rabbit polyclonal anti-mL40 (1:5000)                                                                                                               | Novusbio                   | NBP1-82620 |
| Rabbit polyclonal anti-mL43 (1:5000)                                                                                                               | Proteintech                | 17477-1-AP |
| Rabbit polyclonal anti-mL44 (1:20000)                                                                                                              | Proteintech                | 16394-1-AP |
| Rabbit polyclonal anti-mL45 (1:5000)                                                                                                               | Proteintech                | 15682-1-AP |
| Rabbit polyclonal anti-mL46 (1:10000)                                                                                                              | Proteintech                | 16611-1-AP |
| Rabbit polyclonal anti-mL48 (1:5000)                                                                                                               | Proteintech                | 14677-1-AP |
| Rabbit polyclonal anti-mL50 (1:1000)                                                                                                               | Invitrogen                 | PA5-54638  |
| Rabbit polyclonal anti-mL52 (1:1000)                                                                                                               | Proteintech                | 16800-1-AP |
| Rabbit polyclonal anti-mL53 (1:1000)                                                                                                               | Proteintech                | 16142-1-AP |
| Rabbit polyclonal anti-mL54 (1:1000)                                                                                                               | Proteintech                | 17683-1-AP |
| Rabbit polyclonal anti-mL62 (1:1000)                                                                                                               | Proteintech                | 10403-1-AP |
| Rabbit polyclonal anti-mL64 (1:10000)                                                                                                              | Proteintech                | 16260-1-AP |
| Mouse monoclonal anti-Calnexin (1:250000)<br>(clone 2A2C6)                                                                                         | Proteintech                | 66903-1-Ig |
| Rabbit polyclonal anti-COX1 (1:2000)                                                                                                               | <sup>1</sup>               | PRAB5121   |
| Rabbit polyclonal anti-POLRMT (1:20000)                                                                                                            | Proteintech                | 17748-1-AP |
| Mouse monoclonal anti-SDHA (1:20000)<br>(clone 2E3GC12FB2AE2)                                                                                      | ThermoFisher<br>Scientific | 459200     |
| <b>Oligonucleotides</b>                                                                                                                            |                            |            |
| Primer: Generation of the FLAG-tagged version of uL10m<br>Forward: 5'-<br>CTCTCCGGATCCCCACCATGGCTGCGGCCGTGGCGG-3'                                  | This study;<br>Microsynth  | N/A        |
| Primer: Generation of the FLAG-tagged version of uL10m<br>Reverse: 5'-<br>CTTTCTGATATCCTACTTATCGTCGTCATCCTTGTAATCCG<br>AGTCCGGAACAGTGTGTCAGGATC-3' | This study;<br>Microsynth  | N/A        |
| Primer: Generation of the FLAG-tagged version of uL11m<br>Forward: 5'-<br>CTCTCCAAGCTTCCACCATGTCAAAGCTCGGCCGGGCC-3'                                | This study;<br>Microsynth  | N/A        |
| Primer: Generation of the FLAG-tagged version of uL11m<br>Reverse: 5'-<br>CTTTCTGATATCCTACTTATCGTCGTCATCCTTGTAATCCT<br>TCTTGGCAGCTTCTTCTTGGGCAG-3' | This study;<br>Microsynth  | N/A        |
| Primer: Generation of the FLAG-tagged version of bL12m<br>Forward: 5'-<br>CTCTCCGGATCCCCACCATGCTGCCGGCGGCCGCTC-3'                                  | This study;<br>Microsynth  | N/A        |
| Primer: Generation of the FLAG-tagged version of bL12m<br>Reverse: 5'-<br>CTTTCTCTCGAGCTACTTATCGTCGTCATCCTTGTAATCCT<br>CCAGAACCACGGTGCCGCC-3'      | This study;<br>Microsynth  | N/A        |
| Primer: Generation of the FLAG-tagged version of bL31m<br>Forward: 5'-<br>CTCTCCGGATCCCCACCATGGCGGCCGTGGGCAGCCT-3'                                 | This study;<br>Microsynth  | N/A        |
| Primer: Generation of the FLAG-tagged version of bL31m<br>Reverse: 5'-<br>CTTTCTGATATCCTACTTATCGTCGTCATCCTTGTAATCCT<br>TCTTGGTCCTGGTCCAGAACTGTC-3' | This study;<br>Microsynth  | N/A        |
| Primer: Generation of the FLAG-tagged version of mL39 Forward:<br>5'-CTCTCCAAGCTTCCACCATGGAGGCGCTGGCCATGGG-<br>3'                                  | This study;<br>Microsynth  | N/A        |
| Primer: Generation of the FLAG-tagged version of mL39 Reverse:<br>5'-                                                                              | This study;<br>Microsynth  | N/A        |

|                                                                                                                                                           |                           |     |
|-----------------------------------------------------------------------------------------------------------------------------------------------------------|---------------------------|-----|
| CTTTCTGATATCCTACTTATCGTCGTCATCCTTGTAATCGG<br>TAGATGTACATTCCTCTGTTGCTTTAC-3'                                                                               |                           |     |
| Primer: Generation of the FLAG-tagged version of mL44 Forward:<br>5'- CTCTCCGGATCCCCACCATGGCGTCCGGGCTGGTAAG-<br>3'                                        | This study;<br>Microsynth | N/A |
| Primer: Generation of the FLAG-tagged version of mL44 Reverse:<br>5'-<br>CTTTCTGATATCCTACTTATCGTCGTCATCCTTGTAATCGC<br>TGGCAGTGATGCTCTTTTC-3'              | This study;<br>Microsynth | N/A |
| Primer: Generation of the FLAG-tagged version of bS1m Forward:<br>5'-CTCTCCAAGCTTCCACCATGGCGGCGCTGTGTCGGAC-<br>3'                                         | This study;<br>Microsynth | N/A |
| Primer: Generation of the FLAG-tagged version of bS1m Reverse:<br>5'-<br>CTTTCTGATATCCTACTTATCGTCGTCATCCTTGTAATCTT<br>TTTCATGATGTTCTTCTTTTCGATCTTGAGTC-3' | This study;<br>Microsynth | N/A |
| Primer: Generation of the FLAG-tagged version of uS10m<br>Forward: 5'-<br>CTCTCCGGATCCCCACCATGGCGGCGCGGACAGCGTT-3'                                        | This study;<br>Microsynth | N/A |
| Primer: Generation of the FLAG-tagged version of uS10m Reverse:<br>5'-<br>CTTTCTGATATCCTACTTATCGTCGTCATCCTTGTAATCTG<br>ACTTGCTTCTTCTTTTCTTCTGA-3'         | This study;<br>Microsynth | N/A |
| Primer: Generation of the FLAG-tagged version of mS22 Forward:<br>5'-<br>CTCTCCGGATCCCCACCATGGCGCCCCTCGGAACAACCTG-<br>3'                                  | This study;<br>Microsynth | N/A |
| Primer: Generation of the FLAG-tagged version of mS22 Reverse:<br>5'-<br>CTTTCTGATATCCTACTTATCGTCGTCATCCTTGTAATCGG<br>AAGCTGCAGAATGGCGACTG-3'             | This study;<br>Microsynth | N/A |
| Primer: Generation of the FLAG-tagged version of mS25 Forward:<br>5'-CTCCTAAGCTTCCACCATGCCATGAAGGGCCG-3'                                                  | This study;<br>Microsynth | N/A |
| Primer: Generation of the FLAG-tagged version of mS25 Reverse:<br>5'-<br>CTTCTGATATCCTACTTATCGTCGTCATCCTTGTAATCGTC<br>CTGGGCATCGGCTTTC-3'                 | This study;<br>Microsynth | N/A |
| Primer: Generation of the FLAG-tagged version of mS27 Forward:<br>5'-<br>CTTTCTGGATCCCCACCATGGCTGCCTCCATAGTGCGGC-<br>3'                                   | This study;<br>Microsynth | N/A |
| Primer: Generation of the FLAG-tagged version of mS27 Reverse:<br>5'-<br>CTCTCCGATATCCTACTTATCGTCGTCATCCTTGTAATCGG<br>CAGATGCCTTTGCTGCTTTCTGAGCCTG-3'     | This study;<br>Microsynth | N/A |
| Guide RNA: targeting the Exon 4 of uL4m: 5'-<br>AGTGGCACTGACCGTCAAGC-3'                                                                                   | This study; IDT           | N/A |
| Guide RNA: targeting the Exon 2 of bL20m: 5'-<br>TTTCACAAAGGCTCGAATCA-3'                                                                                  | This study; IDT           | N/A |
| Guide RNA: targeting the Exon 1 of mL44: 5'-<br>AAGCTGGTCCCTCCGGTTTCG-3'                                                                                  | This study;<br>Microsynth | N/A |
| Guide RNA: targeting the Exon 6 of mL45: 5'-<br>GGGCAACGTGTACGGCCAGA-3'                                                                                   | This study;<br>Microsynth | N/A |
| Guide RNA: targeting the Exon 5 of mL62: 5'-<br>ATGGAACCTGACTTCTGCCT-3'                                                                                   | This study; IDT           | N/A |
| Guide RNA: targeting the Exon 1 of uS7m: 5'-<br>CACCGTCGGGCAACCTTCACTG-3'                                                                                 | This study;<br>Microsynth | N/A |
| Guide RNA: targeting the Exon 1 of mS40: 5'-<br>CTGTATTAACACCGTGCTG-3'                                                                                    | This study; IDT           | N/A |

|                                                                                       |                                                                  |          |
|---------------------------------------------------------------------------------------|------------------------------------------------------------------|----------|
| Probe for northern blot: targeting MTRNR1 (12S rRNA): 5'-TCGATTACAGAACAGGCTCCTCTAG-3' | 3                                                                | N/A      |
| Probe for northern blot: targeting MTRNR2 (16S rRNA): 5'-GTTTGGCTAAGGTTGTCTGGTAGTA-3' | 2                                                                | N/A      |
| Probe for northern blot: targeting 18S rRNA: 5'-TTTACTTCCTCTAGATAGTCAAGTTCGACC-3'     | 4                                                                | N/A      |
| <b>Experimental models: Cell Lines</b>                                                |                                                                  |          |
| HEK293-Flp-In T-Rex WT                                                                | ThermoFisher Scientific                                          | R78007   |
| HEK293-Flp-In T-Rex uL4m <sup>-/-</sup>                                               | This study                                                       | N/A      |
| HEK293-Flp-In T-Rex bL20m <sup>-/-</sup>                                              | This study                                                       | N/A      |
| HEK293-Flp-In T-Rex mL44 <sup>-/-</sup>                                               | This study                                                       | N/A      |
| HEK293-Flp-In T-Rex mL45 <sup>-/-</sup>                                               | This study                                                       | N/A      |
| HEK293-Flp-In T-Rex mL62 <sup>-/-</sup>                                               | This study                                                       | N/A      |
| HEK293-Flp-In T-Rex uS7m <sup>-/-</sup>                                               | This study                                                       | N/A      |
| HEK293-Flp-In T-Rex mS40 <sup>-/-</sup>                                               | This study                                                       | N/A      |
| HEK293-Flp-In T-Rex uL10m <sup>FLAG</sup>                                             | This study                                                       | N/A      |
| HEK293-Flp-In T-Rex uL11m <sup>FLAG</sup>                                             | This study                                                       | N/A      |
| HEK293-Flp-In T-Rex bL12m <sup>FLAG</sup>                                             | This study                                                       | N/A      |
| HEK293-Flp-In T-Rex bL31m <sup>FLAG</sup>                                             | This study                                                       | N/A      |
| HEK293-Flp-In T-Rex mL39 <sup>FLAG</sup>                                              | This study                                                       | N/A      |
| HEK293-Flp-In T-Rex mL44 <sup>FLAG</sup>                                              | This study                                                       | N/A      |
| HEK293-Flp-In T-Rex mL62 <sup>FLAG</sup>                                              | 1                                                                | N/A      |
| HEK293-Flp-In T-Rex bS1m <sup>FLAG</sup>                                              | This study                                                       | N/A      |
| HEK293-Flp-In T-Rex uS10m <sup>FLAG</sup>                                             | This study                                                       | N/A      |
| HEK293-Flp-In T-Rex mS22 <sup>FLAG</sup>                                              | This study                                                       | N/A      |
| HEK293-Flp-In T-Rex mS25 <sup>FLAG</sup>                                              | This study                                                       | N/A      |
| HEK293-Flp-In T-Rex mS27 <sup>FLAG</sup>                                              | This study                                                       | N/A      |
| HEK293-Flp-In T-Rex mS40 <sup>FLAG</sup>                                              | 2                                                                | N/A      |
| <b>Recombinant DNA</b>                                                                |                                                                  |          |
| pOG44 Flp-Recombinase Expression Vector                                               | ThermoFisher Scientific                                          | V600520  |
| pcDNA5/FRT/TO                                                                         | ThermoFisher Scientific                                          | V6520-20 |
| pX330-U6-Chimeric_BB-CBh-hSpCas9                                                      | Addgene                                                          | 42230    |
| pEGFP-N1                                                                              | Clontech                                                         | N/A      |
| <b>Software and Algorithm</b>                                                         |                                                                  |          |
| Affinity Designer                                                                     | Serif Europe Ltd                                                 | N/A      |
| Affinity Photo                                                                        | Serif Europe Ltd                                                 | N/A      |
| Typhoon imaging system                                                                | GE Healthcare                                                    | N/A      |
| PDBePISA                                                                              | European Bioinformatics Institute                                | N/A      |
| UCSF ChimeraX                                                                         | Resource for Biocomputing, Visualization, and Informatics (RBVI) | N/A      |

|                                                                                          |                                                     |                                                                     |
|------------------------------------------------------------------------------------------|-----------------------------------------------------|---------------------------------------------------------------------|
| MaxQuant software version 1.6.0.1                                                        | Max-Planck-Institute of Biochemistry <sup>5</sup>   | N/A                                                                 |
| R: A language and environment for statistical computing version 4.1.0                    | R Core Team, R Foundation for Statistical Computing | <a href="https://www.R-project.org/">https://www.R-project.org/</a> |
| <b>Chemicals</b>                                                                         |                                                     |                                                                     |
| Anti-FLAG M2 Affinity Gel                                                                | Sigma-Aldrich                                       | A2220                                                               |
| cOmplete™ Protease inhibitor cocktail tablets                                            | Roche                                               | 11836170001                                                         |
| RiboLock RNase Inhibitor                                                                 | ThermoFisher Scientific                             | EO0381                                                              |
| Ethidium Bromide                                                                         | Roth                                                | 2218.1                                                              |
| GlycoBlue coprecipitant                                                                  | Invitrogen                                          | AM9515                                                              |
| FLAG-peptide                                                                             | Sigma-Aldrich                                       | F3290-4MG                                                           |
| L-Arginine:HCL ( <sup>13</sup> C <sub>6</sub> , 99%)                                     | 14L-515                                             | Cambridge Isotope Laboratories                                      |
| L-Arginine:HCL ( <sup>13</sup> C <sub>6</sub> , 99%; <sup>15</sup> N <sub>4</sub> , 99%) | 16J-570                                             | Cambridge Isotope Laboratories                                      |
| L-Lysine:2HCL (4,4,5,5,-D <sub>4</sub> , 96-98%)                                         | 17H-615                                             | Cambridge Isotope Laboratories                                      |
| L-Lysine:2HCL ( <sup>13</sup> C <sub>6</sub> , 99%; <sup>15</sup> N <sub>2</sub> , 99%)  | 13L-177                                             | Cambridge Isotope Laboratories                                      |
| L-[ <sup>35</sup> S]methionine                                                           | Hartmann Analytic                                   | SCM-01                                                              |
| Adenosine 5'-triphosphate, [ <sup>32</sup> P]                                            | Hartmann Analytic                                   | SRP-501                                                             |
| Emetine dihydrochloride hydrate                                                          | Sigma-Aldrich                                       | 219282                                                              |
| Lipofectamine 3000                                                                       | Invitrogen                                          | L3000-015                                                           |
| GeneJuice                                                                                | Novagen                                             | 70967-3                                                             |
| Alt-R® CRISPR-Cas9 tracrRNA, ATTO™ 550                                                   | Integrated DNA technologies                         | 1075927                                                             |
| Alt-R® S.p. Cas9 Nuclease V3                                                             | Integrated DNA technologies                         | 1081058                                                             |



## Supplementary References

1. Richter-Dennerlein, R. *et al.* Mitochondrial Protein Synthesis Adapts to Influx of Nuclear-Encoded Protein. *Cell* **167**, 471-483.e10 (2016).
2. Lavdovskaia, E. *et al.* The human Obg protein GTPBP10 is involved in mitoribosomal biogenesis. *Nucleic Acids Res.* **46**, 8471–8482 (2018).
3. Lavdovskaia, E. *et al.* Dual function of GTPBP6 in biogenesis and recycling of human mitochondrial ribosomes. *Nucleic acids Res.* **48**, 12929–12942 (2020).
4. Larburu, N. *et al.* Structure of a human pre-40S particle points to a role for RACK1 in the final steps of 18S rRNA processing. *Nucleic Acids Res.* **44**, 8465–8478 (2016).
5. Cox, J. & Mann, M. MaxQuant enables high peptide identification rates, individualized p.p.b.-range mass accuracies and proteome-wide protein quantification. *Nat. Biotechnol.* **26**, 1367–1372 (2008).
