# Supplementary material for: A roadmap for ribosome assembly in human mitochondria
Source: PubMed Central journal article supplement (PMC11638073; doi:10.1038/s41594-024-01356-w), 2024-07-11
Supplement: 41594_2024_1356_MOESM3_ESM.pdf [file 41594_2024_1356_MOESM3_ESM.pdf]

## Peer Review Information

---

**Journal:** Nature Structural & Molecular Biology

**Manuscript Title:** A roadmap for ribosome assembly in human mitochondria

**Corresponding author name(s):** Ricarda Richter-Dennerlein, Henning Urlaub, Juliane Liepe

### Editorial Notes:

**Transferred manuscripts** This manuscript has been previously reviewed at another journal that is not operating a transparent peer review scheme. This document only contains reviewer comments, rebuttal and decision letters for versions considered at Nature Structural & Molecular Biology

### Reviewer Comments & Decisions:

|                                          |
|------------------------------------------|
| <b>Decision Letter, initial version:</b> |
|------------------------------------------|

**Message:** Our ref: NSMB-A48545-T

22nd Dec 2023

Dear Dr. Richter-Dennerlein,

Thank you for submitting your revised manuscript "A roadmap for ribosome assembly in human mitochondria" (NSMB-A48545-T). It has now been assessed by the editorial team, who have found that it has improved in revision, and therefore we'll be happy in principle to publish it in Nature Structural & Molecular Biology, pending minor revisions to comply with our editorial and formatting guidelines.

We are now performing detailed checks on your paper and will send you a checklist detailing our editorial and formatting requirements in the next few weeks. Please note that delays may be expected at this time of the year. Please do not upload the final materials and make any revisions until you receive this additional information from us.

Thank you again for your interest in Nature Structural & Molecular Biology. Please do not hesitate to contact me if you have any questions.

Sincerely,

Sara

Sara Osman, Ph.D.  
Associate Editor  
Nature Structural & Molecular Biology

**Author Rebuttal to Initial comments**

## **Referee #2 (Remarks to the Author):**

*The revised manuscript by Lavdovskaia et al. has been improved in terms of text and new analyses/figures. The key finding of this manuscript was that mitochondrial ribosomal protein-only modules are initially assembled and subsequently assembled on the rRNA scaffold, which is a fundamentally different assembly pathway compared to its bacterial mitoribosomes or cytosolic ribosomes. In the first version of the manuscript, I did not fully understand what they claimed from the original datasets and thought that more careful validations must be required. In the revised manuscript, however, the key finding has been further supported by new experiments/analyses, including the EtBr treatments (Fig. 4), the one-state and two-state-models of MRPs (Extended Data Fig. 1), and clear representation of Extended Data Figs. 7-10. All new pieces support the notion that the formation of protein-only modules is independent of the presence of rRNA.*

*I therefore support the data and claim by Lavdovskaia et al. from a proteomics/biochemical point of view.*

### Our response:

We thank the reviewer for his/her positive feedback about our revised manuscript.

## **Referee #3 (Remarks to the Author):**

*The authors have addressed the reviewer comments very well in their revisions, which have greatly improved their manuscript on human mitochondrial ribosome assembly. In particular, the new Fig. 1 outlines the method and clustering process more clearly. I found the schemes throughout the figures very helpful. The high-resolution sucrose gradients, and the northern blots, now provide much more compelling support for the existence of mitochondrial ribosomal protein complexes. I am largely satisfied with that this conclusion of the paper is supported by the data in the revised manuscript.*

### Our response:

We are very pleased to receive this positive feedback about the restructured manuscript.

*The only aspect of the interpretation that remains in doubt (to me) is whether the pulse-chase scheme can resolve the kinetics of ribosome assembly in ED Fig. 4 as sensitively as implied by the model and the discussion of the paper. I don't think this is a major conclusion of the paper, and so it is OK. The only improvement I would suggest is to downplay or remove the statement about "rate-limiting steps" in the abstract and in the discussion.*

### Our response:

Unfortunately, we have to disagree with this statement and we will aim to clarify this in the manuscript. Neither the kinetic model of the mtSSU assembly shown in ED Fig. 4 nor the reconstructed assembly pathways of the mtSSU and mtLSU are based on the unfractionated triple SILAC data displayed in ED Fig. 1. Latter was only used to characterise the global turnover of mtLSU and mtSSU subunits and known assembly factors inside mitochondria, as well as in whole cell lysate. This dataset provided us the insight that most likely all subunits are rapidly transported into mitochondria, as their turnover in mitochondria and in whole cell lysate did not differ.

We agree with the reviewer, that this dataset is not suited to dissect the assembly pathway and for sure it is not suited to derive precise association and dissociation rates of individual assembly steps. Indeed,

for the latter, we generated a second triple SILAC dataset, which makes use of sucrose fractionation. In this second dataset (Report Figure R3.2 and Report Figure R3.3) we (i) have a higher temporal resolution, and (ii) observe the most dynamic behaviour in the first 5 fractions, in which 'heavy' labelled MRPs decrease up to 50% in the first six hours, while 'heavy' labelled MRPs in the denser sucrose gradient fractions only decrease by max. 30%. Especially the early sucrose gradient fractions describe the interaction and turnover of single proteins and small sub-complexes. Therefore, we do think that our experimental design is suitable to construct the assembly pathway and determine rate-limiting steps. However, we will adjust the wording in the abstract as suggested by the reviewer, as this aspect is indeed not a major conclusion of the paper.

*Here is why I still have some doubts on this point: The authors now use a two-state model to describe the protein turnover, which is more apt, but not well constrained by the data. It is easy to see in ED Fig. 1 that the fast phase is largely complete by 3 hours, which is the first time point. The baseline estimates of heavy proteins at time zero are also quite noisy. These factors translate to a large uncertainty for the rate constant  $k_{ab}$ , which is the likelihood of a protein transferring from state A to state B, versus turnover from state A.*

Our response:

Indeed, we fully agree with the reviewer that this unfractionated dataset in ED Fig 1 is not suited to infer individual turnover and binding rates at high accuracy. Already the model itself - 2-state model - is a strong simplification to describe the mitochondrial ribosome assembly pathway, because we would expect more than two states depending on the specific protein modelled. For this reason, we did not use this dataset to infer the assembly pathway or to inform the kinetic mtSSU model (see also above).

*The authors misunderstood my point about this in their reply that the chosen time points cover the protein half-lives. This is true for the stable population, but not for the unstable population that is being partitioned between assembly and turnover.*

*The authors might want to note that the reported binding and unbinding rate constants in their models are (likely) the composites of many smaller reaction steps. A simple association reaction should occur in minutes, not hours, even assuming a sluggish on-rate of  $10^7$  /Ms and a concentration of 1 nM.*

Our response:

We are assuming that the reviewer refers to the parameter estimates of the kinetic mtSSU model displayed in Supplementary Fig.11. The provided estimates for on-rates are shown in A.U./h (arbitrary units per hour) and hence, can be compared among each other, but do not provide absolute estimates in absence of the precise molarity (as described in detail in supplementary methods). We must stress again, that the mtSSU kinetic model was not informed by the unfractionated data displayed in ED Fig. 1, but only by the sucrose gradient fractionated dataset.

*Apart from the comment above, I think this is an interesting and well-done study that is sure to have an impact on the field of ribosome biogenesis, and on the understanding of mitochondrial physiology.*

**Final Decision Letter:****Message:** 17th Jun 2024

Dear Dr. Richter-Dennerlein,

We are now happy to accept your revised paper "A roadmap for ribosome assembly in human mitochondria" for publication as an Article in Nature Structural & Molecular Biology.

Acceptance is conditional on the manuscript's not being published elsewhere and on there being no announcement of this work to the newspapers, magazines, radio or television until the publication date in Nature Structural & Molecular Biology.

Over the next few weeks, your paper will be copyedited to ensure that it conforms to Nature Structural & Molecular Biology style. Once your paper is typeset, you will receive an email with a link to choose the appropriate publishing options for your paper and our Author Services team will be in touch regarding any additional information that may be required.

After the grant of rights is completed, you will receive a link to your electronic proof via email with a request to make any corrections within 48 hours. If, when you receive your proof, you cannot meet this deadline, please inform us at [rjsproduction@springernature.com](mailto:rjsproduction@springernature.com) immediately.

You will not receive your proofs until the publishing agreement has been received through our system.

Due to the importance of these deadlines, we ask that you please let us know now whether you will be difficult to contact over the next month. If this is the case, we ask you provide us with the contact information (email, phone and fax) of someone who will be able to check the proofs on your behalf, and who will be available to address any last-minute problems.

To assist our authors in disseminating their research to the broader community, our SharedIt initiative provides all co-authors with the ability to generate a unique shareable link that will allow anyone (with or without a subscription) to read the published article. Recipients of the link with a subscription will also be able to download and print the PDF.

As soon as your article is published, you can generate your shareable link by entering the DOI of your article here: <http://authors.springernature.com/share>. Corresponding authors will also receive an automated email with the shareable link

Note the policy of the journal on data deposition:  
<http://www.nature.com/authors/policies/availability.html>.

Your paper will be published online soon after we receive proof corrections and will appear in print in the next available issue. You can find out your date of online publication by contacting the production team shortly after sending your proof corrections.

You may wish to make your media relations office aware of your accepted publication, in case they consider it appropriate to organize some internal or external publicity. Once your paper has been scheduled you will receive an email confirming the publication

details. This is normally 3-4 working days in advance of publication. If you need additional notice of the date and time of publication, please let the production team know when you receive the proof of your article to ensure there is sufficient time to coordinate. Further information on our embargo policies can be found here: <https://www.nature.com/authors/policies/embargo.html>

You can now use a single sign-on for all your accounts, view the status of all your manuscript submissions and reviews, access usage statistics for your published articles and download a record of your refereeing activity for the Nature journals.

If you have not already done so, we strongly recommend that you upload the step-by-step protocols used in this manuscript to the Protocol Exchange. Protocol Exchange is an open online resource that allows researchers to share their detailed experimental know-how. All uploaded protocols are made freely available, assigned DOIs for ease of citation and fully searchable through nature.com. Protocols can be linked to any publications in which they are used and will be linked to from your article. You can also establish a dedicated page to collect all your lab Protocols. By uploading your Protocols to Protocol Exchange, you are enabling researchers to more readily reproduce or adapt the methodology you use, as well as increasing the visibility of your protocols and papers. Upload your Protocols at [www.nature.com/protocolexchange/](http://www.nature.com/protocolexchange/). Further information can be found at [www.nature.com/protocolexchange/about](http://www.nature.com/protocolexchange/about).

An online order form for reprints of your paper is available at <https://www.nature.com/reprints/author-reprints.html>. Please let your coauthors and your institutions' public affairs office know that they are also welcome to order reprints by this method.

Please note that *Nature Structural & Molecular Biology* is a Transformative Journal (TJ). Authors may publish their research with us through the traditional subscription access route or make their paper immediately open access through payment of an article-processing charge (APC). Authors will not be required to make a final decision about access to their article until it has been accepted. [Find out more about Transformative Journals](#)

**Authors may need to take specific actions to achieve [compliance](#) with funder and institutional open access mandates.** If your research is supported by a funder that requires immediate open access (e.g. according to [Plan S principles](#)) then you should select the gold OA route, and we will direct you to the compliant route where possible. For authors selecting the subscription publication route, the journal's standard licensing terms will need to be accepted, including [self-archiving policies](#). Those licensing terms will supersede any other terms that the author or any third party may assert apply to any version of the manuscript.

In approximately 10 business days you will receive an email with a link to choose the appropriate publishing options for your paper and our Author Services team will be in touch regarding any additional information that may be required.

You will not receive your proofs until the publishing agreement has been received through our system.

If you have any questions about our publishing options, costs, Open Access requirements, or our legal forms, please contact [ASJournals@springernature.com](mailto:ASJournals@springernature.com)

Sincerely,  
Sara

Sara Osman, Ph.D.  
Senior Editor  
Nature Structural & Molecular Biology
